# Supplementary material
Source: PubMed Central journal article supplement (PMC2268599)
Supplement: pnas_0709632105_1.pdf [file pnas_0709632105_1.pdf]

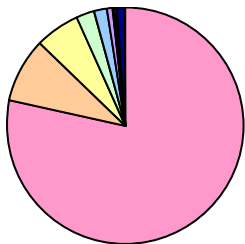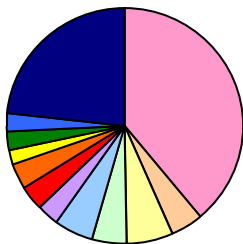

$\geq 4$  siRNAs in wt  
n=3880

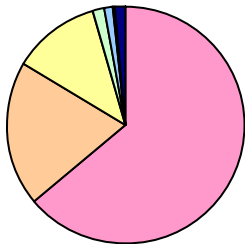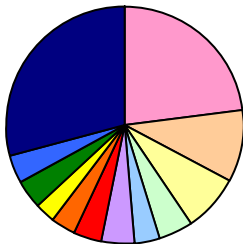

$\geq 10$  siRNAs in wt  
n=1768

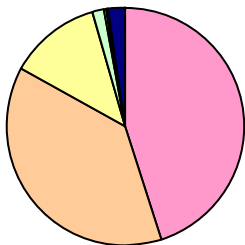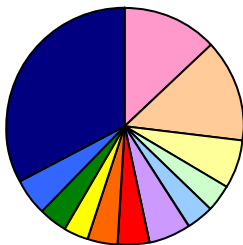

$\geq 20$  siRNAs in wt  
n=836

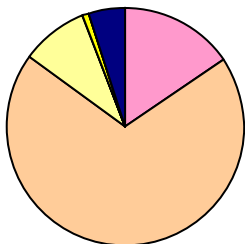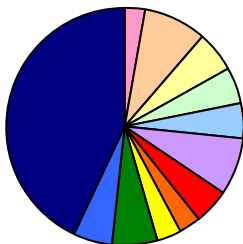

$\geq 50$  siRNAs in wt  
n=255

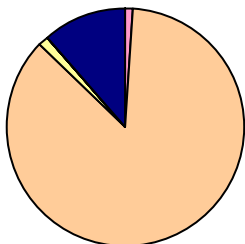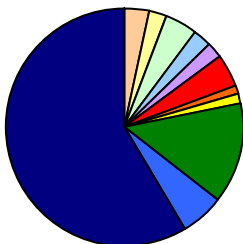

$\geq 100$  siRNAs in wt  
n=87

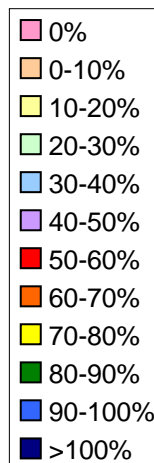

abundance as a  
percentage of wt

PolIVa dependency

PolIVb dependency
