# Supplementary material
Source: PubMed Central journal article supplement (PMC2268599)
Supplement: pnas_0709632105_4.pdf [file pnas_0709632105_4.pdf]

**Table 2. siRNA generating loci.**

| locus ID       | chr | start     | stop      | cloned siRNAs |         |         | unique siRNA | TE |
|----------------|-----|-----------|-----------|---------------|---------|---------|--------------|----|
|                |     |           |           | wt            | nripd1a | nripd1b |              |    |
| at_locus.00001 | 1   | 2         | 265       | 8             | 0       | 1       | yes          |    |
| at_locus.00002 | 1   | 794       | 960       | 4             | 0       | 0       | yes          |    |
| at_locus.00003 | 1   | 17,055    | 17,460    | 8             | 0       | 0       | no           | TE |
| at_locus.00004 | 1   | 17,936    | 18,228    | 15            | 2       | 1       | no           | TE |
| at_locus.00005 | 1   | 42,311    | 42,434    | 6             | 0       | 0       | no           |    |
| at_locus.00006 | 1   | 44,717    | 44,745    | 4             | 0       | 0       | no           |    |
| at_locus.00007 | 1   | 77,318    | 77,495    | 7             | 0       | 2       | no           | TE |
| at_locus.00008 | 1   | 78,931    | 79,121    | 12            | 111     | 62      | yes          |    |
| at_locus.00009 | 1   | 234,014   | 234,153   | 2             | 6       | 0       | yes          |    |
| at_locus.00010 | 1   | 239,121   | 239,294   | 9             | 2       | 0       | yes          |    |
| at_locus.00011 | 1   | 257,727   | 258,630   | 24            | 2       | 2       | no           | TE |
| at_locus.00012 | 1   | 292,112   | 292,612   | 21            | 0       | 11      | yes          |    |
| at_locus.00013 | 1   | 431,343   | 431,489   | 25            | 1       | 0       | yes          |    |
| at_locus.00014 | 1   | 431,907   | 432,003   | 26            | 0       | 1       | no           | TE |
| at_locus.00015 | 1   | 433,124   | 433,454   | 22            | 1       | 2       | no           | TE |
| at_locus.00016 | 1   | 446,619   | 447,422   | 20            | 0       | 7       | yes          |    |
| at_locus.00017 | 1   | 499,595   | 500,158   | 33            | 3       | 0       | no           | TE |
| at_locus.00018 | 1   | 500,405   | 500,860   | 11            | 0       | 0       | no           | TE |
| at_locus.00019 | 1   | 501,289   | 501,372   | 8             | 0       | 0       | no           | TE |
| at_locus.00021 | 1   | 540,468   | 540,973   | 14            | 0       | 0       | yes          | TE |
| at_locus.00022 | 1   | 549,927   | 550,806   | 2             | 0       | 0       | no           |    |
| at_locus.00023 | 1   | 587,500   | 587,978   | 16            | 0       | 0       | yes          | TE |
| at_locus.00024 | 1   | 670,627   | 670,905   | 11            | 0       | 5       | yes          |    |
| at_locus.00025 | 1   | 696,476   | 696,722   | 8             | 0       | 0       | no           | TE |
| at_locus.00026 | 1   | 697,345   | 697,374   | 4             | 0       | 0       | no           | TE |
| at_locus.00027 | 1   | 758,685   | 758,759   | 21            | 0       | 2       | no           | TE |
| at_locus.00028 | 1   | 759,012   | 759,144   | 4             | 0       | 1       | no           | TE |
| at_locus.00029 | 1   | 759,580   | 760,429   | 32            | 0       | 2       | no           | TE |
| at_locus.00030 | 1   | 781,404   | 781,902   | 2             | 0       | 0       | no           |    |
| at_locus.00031 | 1   | 822,274   | 822,314   | 5             | 0       | 0       | yes          | TE |
| at_locus.00032 | 1   | 875,165   | 875,342   | 5             | 2       | 8       | no           |    |
| at_locus.00033 | 1   | 888,839   | 889,255   | 2             | 0       | 0       | no           |    |
| at_locus.00035 | 1   | 944,357   | 944,389   | 4             | 0       | 0       | yes          |    |
| at_locus.00036 | 1   | 1,009,071 | 1,009,248 | 5             | 2       | 8       | no           |    |

|                |   |           |           |    |   |    |     |    |
|----------------|---|-----------|-----------|----|---|----|-----|----|
| at_locus.00037 | 1 | 1,160,223 | 1,160,298 | 22 | 0 | 0  | no  | TE |
| at_locus.00038 | 1 | 1,160,962 | 1,161,246 | 5  | 0 | 0  | yes | TE |
| at_locus.00039 | 1 | 1,194,446 | 1,195,100 | 42 | 0 | 1  | yes | TE |
| at_locus.00040 | 1 | 1,215,705 | 1,215,828 | 5  | 4 | 3  | yes |    |
| at_locus.00041 | 1 | 1,249,941 | 1,250,839 | 2  | 0 | 0  | no  |    |
| at_locus.00042 | 1 | 1,276,526 | 1,276,583 | 6  | 0 | 0  | no  | TE |
| at_locus.00043 | 1 | 1,289,038 | 1,289,451 | 3  | 0 | 0  | no  |    |
| at_locus.00044 | 1 | 1,430,310 | 1,430,431 | 29 | 0 | 2  | no  |    |
| at_locus.00045 | 1 | 1,430,838 | 1,431,020 | 46 | 1 | 0  | yes | TE |
| at_locus.00046 | 1 | 1,441,673 | 1,442,099 | 12 | 0 | 7  | no  | TE |
| at_locus.00047 | 1 | 1,442,324 | 1,442,498 | 2  | 1 | 5  | yes | TE |
| at_locus.00048 | 1 | 1,476,517 | 1,476,710 | 5  | 0 | 1  | yes | TE |
| at_locus.00049 | 1 | 1,593,062 | 1,593,261 | 6  | 1 | 2  | yes |    |
| at_locus.00050 | 1 | 1,598,313 | 1,598,498 | 4  | 0 | 0  | yes | TE |
| at_locus.00051 | 1 | 1,613,359 | 1,613,796 | 6  | 0 | 1  | yes | TE |
| at_locus.00052 | 1 | 1,738,944 | 1,739,135 | 5  | 0 | 0  | no  | TE |
| at_locus.00053 | 1 | 1,882,116 | 1,882,209 | 9  | 0 | 0  | yes |    |
| at_locus.00054 | 1 | 1,975,167 | 1,975,231 | 4  | 0 | 0  | no  |    |
| at_locus.00055 | 1 | 1,975,540 | 1,975,584 | 17 | 0 | 1  | no  | TE |
| at_locus.00056 | 1 | 1,975,964 | 1,976,290 | 8  | 2 | 1  | yes | TE |
| at_locus.00057 | 1 | 2,014,948 | 2,015,084 | 7  | 7 | 9  | no  |    |
| at_locus.00060 | 1 | 2,157,021 | 2,157,252 | 4  | 0 | 4  | yes | TE |
| at_locus.00061 | 1 | 2,165,569 | 2,165,595 | 3  | 7 | 5  | yes |    |
| at_locus.00062 | 1 | 2,189,267 | 2,189,499 | 5  | 0 | 5  | yes |    |
| at_locus.00063 | 1 | 2,234,936 | 2,235,166 | 13 | 0 | 0  | no  | TE |
| at_locus.00065 | 1 | 2,340,178 | 2,340,424 | 4  | 0 | 0  | yes |    |
| at_locus.00066 | 1 | 2,415,681 | 2,415,941 | 7  | 0 | 1  | yes | TE |
| at_locus.00067 | 1 | 2,473,015 | 2,473,302 | 35 | 0 | 0  | no  | TE |
| at_locus.00068 | 1 | 2,531,496 | 2,531,619 | 11 | 0 | 0  | yes | TE |
| at_locus.00070 | 1 | 2,587,334 | 2,587,552 | 7  | 0 | 0  | no  | TE |
| at_locus.00071 | 1 | 2,587,831 | 2,588,400 | 20 | 0 | 0  | no  | TE |
| at_locus.00072 | 1 | 2,657,466 | 2,657,786 | 11 | 0 | 4  | yes | TE |
| at_locus.00073 | 1 | 2,676,166 | 2,676,181 | 0  | 0 | 10 | no  |    |
| at_locus.00074 | 1 | 2,788,457 | 2,788,735 | 12 | 0 | 1  | no  | TE |
| at_locus.00075 | 1 | 2,789,000 | 2,789,304 | 4  | 0 | 4  | no  | TE |
| at_locus.00076 | 1 | 2,790,748 | 2,791,484 | 8  | 0 | 10 | no  | TE |
| at_locus.00077 | 1 | 2,792,975 | 2,793,613 | 1  | 0 | 8  | no  | TE |

|                |   |           |           |    |    |    |     |    |
|----------------|---|-----------|-----------|----|----|----|-----|----|
| at_locus.00078 | 1 | 2,794,006 | 2,794,416 | 1  | 1  | 5  | no  | TE |
| at_locus.00079 | 1 | 2,795,207 | 2,795,823 | 7  | 0  | 5  | no  | TE |
| at_locus.00080 | 1 | 2,796,348 | 2,797,108 | 18 | 0  | 5  | no  | TE |
| at_locus.00081 | 1 | 2,797,860 | 2,798,154 | 1  | 0  | 5  | no  | TE |
| at_locus.00082 | 1 | 2,798,678 | 2,799,006 | 4  | 0  | 0  | no  | TE |
| at_locus.00083 | 1 | 2,799,274 | 2,799,589 | 5  | 0  | 0  | no  | TE |
| at_locus.00084 | 1 | 2,799,854 | 2,800,037 | 5  | 0  | 2  | no  | TE |
| at_locus.00086 | 1 | 2,986,696 | 2,986,837 | 5  | 0  | 0  | yes | TE |
| at_locus.00087 | 1 | 3,023,515 | 3,024,276 | 18 | 0  | 0  | no  | TE |
| at_locus.00088 | 1 | 3,063,597 | 3,063,635 | 10 | 0  | 0  | yes |    |
| at_locus.00089 | 1 | 3,073,478 | 3,074,017 | 16 | 0  | 0  | no  | TE |
| at_locus.00090 | 1 | 3,074,715 | 3,074,946 | 5  | 0  | 0  | no  | TE |
| at_locus.00091 | 1 | 3,180,541 | 3,180,722 | 0  | 12 | 11 | yes |    |
| at_locus.00092 | 1 | 3,251,279 | 3,251,384 | 11 | 0  | 0  | no  | TE |
| at_locus.00093 | 1 | 3,342,602 | 3,342,995 | 9  | 1  | 2  | yes | TE |
| at_locus.00094 | 1 | 3,413,562 | 3,413,785 | 10 | 0  | 0  | no  | TE |
| at_locus.00095 | 1 | 3,414,003 | 3,414,839 | 36 | 2  | 0  | yes | TE |
| at_locus.00096 | 1 | 3,469,677 | 3,469,840 | 2  | 4  | 0  | no  |    |
| at_locus.00097 | 1 | 3,497,755 | 3,497,779 | 4  | 0  | 0  | no  | TE |
| at_locus.00098 | 1 | 3,547,597 | 3,547,753 | 5  | 0  | 0  | yes |    |
| at_locus.00099 | 1 | 3,762,775 | 3,762,891 | 4  | 0  | 0  | no  | TE |
| at_locus.00100 | 1 | 3,771,751 | 3,771,789 | 5  | 0  | 0  | yes | TE |
| at_locus.00101 | 1 | 3,780,837 | 3,781,167 | 54 | 0  | 1  | no  | TE |
| at_locus.00102 | 1 | 3,781,417 | 3,781,906 | 4  | 0  | 2  | no  | TE |
| at_locus.00103 | 1 | 3,781,932 | 3,781,977 | 0  | 0  | 6  | no  | TE |
| at_locus.00104 | 1 | 3,782,806 | 3,783,173 | 5  | 0  | 1  | no  | TE |
| at_locus.00105 | 1 | 3,785,014 | 3,785,683 | 57 | 0  | 2  | no  | TE |
| at_locus.00106 | 1 | 3,825,794 | 3,825,926 | 4  | 1  | 3  | no  | TE |
| at_locus.00107 | 1 | 3,826,291 | 3,827,555 | 16 | 0  | 10 | no  | TE |
| at_locus.00108 | 1 | 3,892,172 | 3,892,206 | 6  | 0  | 0  | yes |    |
| at_locus.00109 | 1 | 3,898,228 | 3,898,294 | 4  | 0  | 0  | yes |    |
| at_locus.00110 | 1 | 3,910,516 | 3,910,601 | 11 | 0  | 0  | no  | TE |
| at_locus.00111 | 1 | 3,933,175 | 3,933,444 | 20 | 2  | 1  | yes |    |
| at_locus.00112 | 1 | 3,961,366 | 3,961,450 | 13 | 35 | 29 | yes |    |
| at_locus.00113 | 1 | 3,980,049 | 3,980,409 | 6  | 0  | 0  | yes |    |
| at_locus.00114 | 1 | 4,007,236 | 4,007,300 | 2  | 5  | 0  | no  |    |
| at_locus.00116 | 1 | 4,068,762 | 4,069,206 | 39 | 0  | 17 | yes |    |

|                |   |           |           |     |   |     |     |    |
|----------------|---|-----------|-----------|-----|---|-----|-----|----|
| at_locus.00117 | 1 | 4,093,262 | 4,093,697 | 20  | 0 | 1   | yes | TE |
| at_locus.00118 | 1 | 4,094,202 | 4,094,361 | 22  | 1 | 1   | yes | TE |
| at_locus.00119 | 1 | 4,110,095 | 4,111,053 | 30  | 2 | 2   | yes | TE |
| at_locus.00120 | 1 | 4,111,112 | 4,111,282 | 0   | 0 | 4   | no  | TE |
| at_locus.00121 | 1 | 4,111,487 | 4,111,536 | 2   | 0 | 0   | no  | TE |
| at_locus.00122 | 1 | 4,111,932 | 4,112,970 | 12  | 1 | 6   | yes | TE |
| at_locus.00123 | 1 | 4,182,121 | 4,182,309 | 3   | 6 | 1   | yes |    |
| at_locus.00124 | 1 | 4,293,107 | 4,293,391 | 1   | 2 | 5   | yes |    |
| at_locus.00125 | 1 | 4,312,395 | 4,312,650 | 4   | 0 | 0   | yes |    |
| at_locus.00126 | 1 | 4,355,005 | 4,355,225 | 3   | 6 | 0   | yes |    |
| at_locus.00127 | 1 | 4,406,019 | 4,406,898 | 30  | 3 | 18  | yes | TE |
| at_locus.00128 | 1 | 4,407,281 | 4,408,926 | 64  | 0 | 21  | yes | TE |
| at_locus.00129 | 1 | 4,409,237 | 4,409,754 | 12  | 1 | 5   | yes | TE |
| at_locus.00130 | 1 | 4,410,298 | 4,411,099 | 50  | 3 | 7   | no  | TE |
| at_locus.00131 | 1 | 4,505,547 | 4,505,612 | 4   | 0 | 0   | yes |    |
| at_locus.00132 | 1 | 4,505,868 | 4,507,416 | 296 | 4 | 211 | yes | TE |
| at_locus.00133 | 1 | 4,525,158 | 4,525,458 | 4   | 0 | 0   | yes |    |
| at_locus.00134 | 1 | 4,583,277 | 4,583,448 | 14  | 0 | 0   | yes | TE |
| at_locus.00135 | 1 | 4,619,129 | 4,619,710 | 53  | 0 | 21  | yes |    |
| at_locus.00136 | 1 | 4,620,025 | 4,621,050 | 28  | 0 | 26  | yes |    |
| at_locus.00137 | 1 | 4,685,982 | 4,686,013 | 4   | 0 | 0   | no  |    |
| at_locus.00138 | 1 | 4,708,309 | 4,708,513 | 4   | 0 | 1   | yes |    |
| at_locus.00139 | 1 | 4,720,162 | 4,720,589 | 106 | 4 | 2   | yes |    |
| at_locus.00140 | 1 | 4,720,942 | 4,721,338 | 18  | 0 | 0   | yes |    |
| at_locus.00143 | 1 | 4,770,114 | 4,770,614 | 26  | 1 | 1   | yes | TE |
| at_locus.00144 | 1 | 4,785,458 | 4,785,500 | 9   | 0 | 0   | no  | TE |
| at_locus.00145 | 1 | 4,786,433 | 4,786,581 | 32  | 0 | 0   | no  | TE |
| at_locus.00146 | 1 | 4,786,954 | 4,787,123 | 13  | 0 | 0   | yes | TE |
| at_locus.00147 | 1 | 4,842,288 | 4,842,440 | 0   | 7 | 8   | no  |    |
| at_locus.00148 | 1 | 4,860,324 | 4,860,515 | 12  | 0 | 0   | yes |    |
| at_locus.00149 | 1 | 4,896,496 | 4,896,670 | 11  | 1 | 0   | yes |    |
| at_locus.00150 | 1 | 4,966,587 | 4,966,691 | 4   | 0 | 0   | yes | TE |
| at_locus.00151 | 1 | 5,056,021 | 5,056,238 | 6   | 1 | 1   | yes |    |
| at_locus.00152 | 1 | 5,098,407 | 5,098,919 | 5   | 1 | 0   | yes | TE |
| at_locus.00153 | 1 | 5,099,139 | 5,099,462 | 8   | 0 | 5   | no  |    |
| at_locus.00154 | 1 | 5,100,544 | 5,100,941 | 8   | 0 | 4   | yes | TE |
| at_locus.00155 | 1 | 5,101,308 | 5,101,334 | 0   | 0 | 4   | no  |    |

|                |   |           |           |     |    |     |     |    |
|----------------|---|-----------|-----------|-----|----|-----|-----|----|
| at_locus.00156 | 1 | 5,101,928 | 5,102,119 | 9   | 1  | 1   | yes |    |
| at_locus.00157 | 1 | 5,285,118 | 5,285,390 | 6   | 2  | 0   | yes |    |
| at_locus.00158 | 1 | 5,297,879 | 5,298,167 | 4   | 76 | 18  | yes |    |
| at_locus.00159 | 1 | 5,356,867 | 5,357,082 | 4   | 0  | 0   | yes |    |
| at_locus.00160 | 1 | 5,391,434 | 5,391,569 | 12  | 0  | 0   | yes | TE |
| at_locus.00161 | 1 | 5,395,397 | 5,395,678 | 5   | 0  | 9   | yes |    |
| at_locus.00162 | 1 | 5,400,095 | 5,400,137 | 2   | 4  | 0   | yes |    |
| at_locus.00163 | 1 | 5,531,292 | 5,531,879 | 9   | 0  | 0   | yes | TE |
| at_locus.00164 | 1 | 5,657,361 | 5,657,558 | 5   | 0  | 1   | no  | TE |
| at_locus.00165 | 1 | 5,679,302 | 5,679,398 | 5   | 0  | 1   | no  | TE |
| at_locus.00166 | 1 | 5,681,695 | 5,681,741 | 10  | 0  | 0   | no  | TE |
| at_locus.00167 | 1 | 5,699,972 | 5,700,341 | 23  | 0  | 1   | no  |    |
| at_locus.00168 | 1 | 5,700,604 | 5,700,697 | 8   | 0  | 2   | no  |    |
| at_locus.00169 | 1 | 5,700,914 | 5,701,251 | 8   | 0  | 0   | no  | TE |
| at_locus.00170 | 1 | 5,701,469 | 5,701,729 | 23  | 0  | 2   | yes |    |
| at_locus.00171 | 1 | 5,701,952 | 5,702,051 | 5   | 0  | 0   | no  |    |
| at_locus.00172 | 1 | 5,758,395 | 5,758,575 | 0   | 15 | 11  | yes |    |
| at_locus.00173 | 1 | 5,799,026 | 5,799,497 | 31  | 1  | 1   | yes | TE |
| at_locus.00174 | 1 | 5,807,085 | 5,807,460 | 5   | 0  | 1   | yes |    |
| at_locus.00175 | 1 | 5,808,043 | 5,808,335 | 13  | 1  | 2   | yes |    |
| at_locus.00176 | 1 | 5,813,211 | 5,813,388 | 10  | 1  | 1   | no  |    |
| at_locus.00177 | 1 | 5,867,024 | 5,867,108 | 5   | 0  | 0   | yes |    |
| at_locus.00178 | 1 | 5,899,162 | 5,899,833 | 65  | 0  | 1   | yes | TE |
| at_locus.00179 | 1 | 5,958,839 | 5,958,906 | 4   | 0  | 0   | no  | TE |
| at_locus.00180 | 1 | 5,965,471 | 5,965,728 | 7   | 0  | 0   | yes | TE |
| at_locus.00181 | 1 | 5,966,942 | 5,966,980 | 5   | 0  | 0   | yes | TE |
| at_locus.00182 | 1 | 5,970,781 | 5,972,817 | 200 | 6  | 170 | yes |    |
| at_locus.00183 | 1 | 5,974,910 | 5,975,051 | 10  | 1  | 0   | yes |    |
| at_locus.00184 | 1 | 5,999,207 | 5,999,332 | 0   | 3  | 0   | no  | TE |
| at_locus.00185 | 1 | 6,010,746 | 6,010,763 | 1   | 0  | 4   | yes | TE |
| at_locus.00186 | 1 | 6,050,415 | 6,050,430 | 0   | 0  | 6   | no  |    |
| at_locus.00187 | 1 | 6,124,276 | 6,124,351 | 21  | 0  | 0   | no  |    |
| at_locus.00188 | 1 | 6,156,427 | 6,157,084 | 25  | 0  | 1   | yes | TE |
| at_locus.00189 | 1 | 6,157,313 | 6,157,952 | 11  | 1  | 13  | yes | TE |
| at_locus.00190 | 1 | 6,158,357 | 6,158,759 | 6   | 0  | 1   | yes | TE |
| at_locus.00191 | 1 | 6,191,398 | 6,191,448 | 4   | 0  | 0   | no  |    |
| at_locus.00192 | 1 | 6,197,237 | 6,197,804 | 7   | 0  | 0   | yes |    |

|                |   |           |           |    |     |     |     |    |
|----------------|---|-----------|-----------|----|-----|-----|-----|----|
| at_locus.00193 | 1 | 6,210,902 | 6,211,163 | 5  | 0   | 0   | no  | TE |
| at_locus.00194 | 1 | 6,211,458 | 6,211,961 | 4  | 0   | 4   | yes |    |
| at_locus.00195 | 1 | 6,218,683 | 6,219,131 | 18 | 0   | 1   | yes | TE |
| at_locus.00196 | 1 | 6,220,644 | 6,220,828 | 87 | 762 | 172 | yes |    |
| at_locus.00197 | 1 | 6,233,951 | 6,234,252 | 4  | 0   | 0   | yes | TE |
| at_locus.00198 | 1 | 6,234,991 | 6,235,078 | 6  | 0   | 1   | no  | TE |
| at_locus.00199 | 1 | 6,235,818 | 6,236,088 | 10 | 0   | 4   | yes |    |
| at_locus.00200 | 1 | 6,236,555 | 6,237,010 | 7  | 0   | 8   | yes | TE |
| at_locus.00201 | 1 | 6,237,310 | 6,237,378 | 3  | 0   | 1   | no  | TE |
| at_locus.00202 | 1 | 6,237,626 | 6,237,664 | 13 | 0   | 1   | no  | TE |
| at_locus.00203 | 1 | 6,273,641 | 6,273,687 | 10 | 0   | 0   | no  | TE |
| at_locus.00204 | 1 | 6,275,983 | 6,276,286 | 6  | 0   | 1   | no  | TE |
| at_locus.00205 | 1 | 6,302,721 | 6,303,022 | 6  | 0   | 4   | no  | TE |
| at_locus.00206 | 1 | 6,379,364 | 6,379,790 | 12 | 1   | 5   | yes |    |
| at_locus.00207 | 1 | 6,403,420 | 6,403,649 | 6  | 0   | 0   | no  | TE |
| at_locus.00208 | 1 | 6,454,747 | 6,454,849 | 6  | 0   | 0   | no  | TE |
| at_locus.00209 | 1 | 6,465,921 | 6,466,177 | 2  | 4   | 10  | yes |    |
| at_locus.00210 | 1 | 6,470,411 | 6,470,479 | 7  | 0   | 1   | yes | TE |
| at_locus.00211 | 1 | 6,514,469 | 6,514,555 | 6  | 0   | 0   | no  | TE |
| at_locus.00212 | 1 | 6,538,410 | 6,539,226 | 70 | 3   | 11  | no  | TE |
| at_locus.00213 | 1 | 6,539,766 | 6,540,235 | 15 | 0   | 7   | no  | TE |
| at_locus.00214 | 1 | 6,540,507 | 6,541,628 | 18 | 0   | 10  | no  | TE |
| at_locus.00215 | 1 | 6,541,837 | 6,542,159 | 37 | 0   | 2   | yes | TE |
| at_locus.00216 | 1 | 6,542,555 | 6,543,526 | 59 | 3   | 22  | no  | TE |
| at_locus.00217 | 1 | 6,575,073 | 6,575,268 | 11 | 0   | 2   | yes |    |
| at_locus.00218 | 1 | 6,589,364 | 6,589,916 | 2  | 0   | 5   | yes |    |
| at_locus.00219 | 1 | 6,593,424 | 6,593,560 | 3  | 0   | 0   | no  |    |
| at_locus.00220 | 1 | 6,695,452 | 6,695,557 | 26 | 54  | 16  | yes |    |
| at_locus.00221 | 1 | 6,704,188 | 6,704,931 | 61 | 1   | 10  | yes | TE |
| at_locus.00222 | 1 | 6,705,561 | 6,706,048 | 12 | 0   | 4   | no  | TE |
| at_locus.00223 | 1 | 6,706,742 | 6,708,044 | 52 | 0   | 18  | no  | TE |
| at_locus.00224 | 1 | 6,708,503 | 6,709,302 | 63 | 1   | 16  | yes | TE |
| at_locus.00225 | 1 | 6,715,248 | 6,715,621 | 5  | 0   | 0   | yes |    |
| at_locus.00226 | 1 | 6,722,884 | 6,723,081 | 6  | 0   | 0   | no  |    |
| at_locus.00227 | 1 | 6,736,563 | 6,736,855 | 7  | 2   | 1   | no  | TE |
| at_locus.00228 | 1 | 6,756,754 | 6,756,808 | 5  | 0   | 3   | no  |    |
| at_locus.00229 | 1 | 6,906,184 | 6,906,412 | 16 | 2   | 1   | yes |    |

|                |   |           |           |    |    |    |     |    |
|----------------|---|-----------|-----------|----|----|----|-----|----|
| at_locus.00230 | 1 | 6,947,577 | 6,947,768 | 12 | 0  | 1  | yes |    |
| at_locus.00231 | 1 | 6,948,300 | 6,948,511 | 17 | 0  | 1  | yes |    |
| at_locus.00232 | 1 | 7,026,365 | 7,027,191 | 25 | 0  | 1  | yes |    |
| at_locus.00233 | 1 | 7,035,181 | 7,035,266 | 8  | 0  | 0  | no  | TE |
| at_locus.00234 | 1 | 7,035,987 | 7,037,278 | 71 | 6  | 0  | no  | TE |
| at_locus.00235 | 1 | 7,052,011 | 7,052,045 | 4  | 0  | 0  | no  |    |
| at_locus.00236 | 1 | 7,058,196 | 7,058,289 | 12 | 44 | 8  | yes |    |
| at_locus.00237 | 1 | 7,065,430 | 7,065,478 | 5  | 0  | 1  | no  |    |
| at_locus.00238 | 1 | 7,075,391 | 7,075,439 | 5  | 0  | 1  | no  |    |
| at_locus.00239 | 1 | 7,085,134 | 7,085,169 | 1  | 4  | 0  | yes |    |
| at_locus.00240 | 1 | 7,138,781 | 7,138,911 | 7  | 0  | 0  | yes |    |
| at_locus.00241 | 1 | 7,241,122 | 7,241,491 | 22 | 0  | 0  | yes |    |
| at_locus.00242 | 1 | 7,251,943 | 7,251,973 | 10 | 0  | 0  | yes |    |
| at_locus.00243 | 1 | 7,255,420 | 7,255,817 | 4  | 0  | 4  | no  | TE |
| at_locus.00244 | 1 | 7,256,655 | 7,257,196 | 9  | 0  | 1  | no  | TE |
| at_locus.00245 | 1 | 7,281,807 | 7,281,843 | 9  | 0  | 0  | yes | TE |
| at_locus.00246 | 1 | 7,282,816 | 7,283,851 | 30 | 0  | 2  | no  | TE |
| at_locus.00247 | 1 | 7,353,579 | 7,353,762 | 5  | 0  | 2  | no  | TE |
| at_locus.00248 | 1 | 7,354,027 | 7,354,342 | 5  | 0  | 0  | no  | TE |
| at_locus.00249 | 1 | 7,354,610 | 7,354,938 | 4  | 0  | 0  | no  | TE |
| at_locus.00250 | 1 | 7,356,508 | 7,357,268 | 18 | 0  | 5  | no  | TE |
| at_locus.00251 | 1 | 7,357,793 | 7,358,409 | 7  | 0  | 5  | no  | TE |
| at_locus.00252 | 1 | 7,359,200 | 7,359,610 | 1  | 1  | 5  | no  | TE |
| at_locus.00253 | 1 | 7,360,003 | 7,360,641 | 1  | 0  | 8  | no  | TE |
| at_locus.00254 | 1 | 7,362,132 | 7,362,868 | 8  | 0  | 10 | no  | TE |
| at_locus.00255 | 1 | 7,364,312 | 7,364,616 | 4  | 0  | 4  | no  | TE |
| at_locus.00256 | 1 | 7,364,881 | 7,365,188 | 13 | 0  | 1  | no  | TE |
| at_locus.00257 | 1 | 7,365,716 | 7,365,969 | 11 | 0  | 0  | yes |    |
| at_locus.00258 | 1 | 7,392,273 | 7,392,423 | 5  | 2  | 1  | yes | TE |
| at_locus.00259 | 1 | 7,393,097 | 7,393,349 | 10 | 0  | 0  | yes | TE |
| at_locus.00260 | 1 | 7,423,512 | 7,423,594 | 2  | 0  | 1  | no  |    |
| at_locus.00261 | 1 | 7,431,379 | 7,431,745 | 4  | 0  | 0  | yes |    |
| at_locus.00262 | 1 | 7,505,143 | 7,505,322 | 7  | 0  | 2  | yes |    |
| at_locus.00263 | 1 | 7,522,023 | 7,522,378 | 17 | 0  | 4  | yes |    |
| at_locus.00264 | 1 | 7,710,359 | 7,710,734 | 2  | 0  | 14 | yes |    |
| at_locus.00265 | 1 | 7,711,095 | 7,711,359 | 3  | 0  | 6  | yes |    |
| at_locus.00266 | 1 | 7,712,141 | 7,712,362 | 3  | 1  | 12 | yes |    |

|                |   |           |           |    |   |    |     |    |
|----------------|---|-----------|-----------|----|---|----|-----|----|
| at_locus.00267 | 1 | 7,714,767 | 7,715,097 | 53 | 0 | 1  | no  | TE |
| at_locus.00268 | 1 | 7,717,439 | 7,717,747 | 20 | 0 | 1  | no  | TE |
| at_locus.00269 | 1 | 7,718,512 | 7,718,557 | 0  | 0 | 6  | no  | TE |
| at_locus.00270 | 1 | 7,719,721 | 7,719,989 | 4  | 0 | 1  | no  | TE |
| at_locus.00271 | 1 | 7,720,471 | 7,720,614 | 2  | 0 | 4  | no  | TE |
| at_locus.00272 | 1 | 7,721,830 | 7,722,499 | 56 | 0 | 2  | no  | TE |
| at_locus.00273 | 1 | 7,725,313 | 7,725,494 | 29 | 1 | 3  | yes | TE |
| at_locus.00274 | 1 | 7,747,796 | 7,748,251 | 1  | 0 | 4  | yes |    |
| at_locus.00275 | 1 | 7,761,250 | 7,761,367 | 4  | 0 | 1  | no  | TE |
| at_locus.00276 | 1 | 7,761,573 | 7,762,083 | 22 | 2 | 1  | no  | TE |
| at_locus.00277 | 1 | 7,766,493 | 7,766,542 | 5  | 0 | 0  | yes | TE |
| at_locus.00278 | 1 | 7,787,140 | 7,787,615 | 29 | 0 | 36 | yes |    |
| at_locus.00279 | 1 | 7,808,648 | 7,809,042 | 15 | 0 | 0  | yes |    |
| at_locus.00280 | 1 | 7,810,141 | 7,810,298 | 4  | 0 | 0  | yes |    |
| at_locus.00281 | 1 | 7,960,242 | 7,961,127 | 28 | 0 | 12 | no  | TE |
| at_locus.00282 | 1 | 7,985,147 | 7,985,678 | 44 | 0 | 4  | no  | TE |
| at_locus.00283 | 1 | 7,986,259 | 7,986,400 | 15 | 0 | 0  | no  | TE |
| at_locus.00284 | 1 | 8,016,446 | 8,016,572 | 8  | 0 | 1  | no  |    |
| at_locus.00285 | 1 | 8,053,118 | 8,053,355 | 9  | 0 | 9  | yes | TE |
| at_locus.00286 | 1 | 8,053,692 | 8,053,834 | 11 | 0 | 12 | yes |    |
| at_locus.00287 | 1 | 8,114,759 | 8,114,844 | 16 | 0 | 0  | no  | TE |
| at_locus.00288 | 1 | 8,115,475 | 8,115,763 | 7  | 0 | 0  | yes | TE |
| at_locus.00289 | 1 | 8,115,984 | 8,116,299 | 35 | 3 | 1  | no  | TE |
| at_locus.00290 | 1 | 8,116,536 | 8,116,608 | 12 | 0 | 0  | no  | TE |
| at_locus.00291 | 1 | 8,154,194 | 8,154,228 | 7  | 0 | 0  | yes |    |
| at_locus.00292 | 1 | 8,160,519 | 8,160,835 | 8  | 0 | 1  | yes | TE |
| at_locus.00293 | 1 | 8,169,868 | 8,169,949 | 6  | 0 | 0  | no  | TE |
| at_locus.00294 | 1 | 8,189,952 | 8,190,125 | 11 | 0 | 0  | no  | TE |
| at_locus.00295 | 1 | 8,190,407 | 8,190,449 | 7  | 0 | 0  | no  | TE |
| at_locus.00296 | 1 | 8,205,206 | 8,205,375 | 4  | 0 | 0  | no  |    |
| at_locus.00297 | 1 | 8,237,773 | 8,238,308 | 9  | 0 | 2  | yes |    |
| at_locus.00298 | 1 | 8,238,678 | 8,239,731 | 15 | 0 | 15 | no  | TE |
| at_locus.00299 | 1 | 8,252,573 | 8,252,605 | 4  | 0 | 0  | yes |    |
| at_locus.00300 | 1 | 8,254,787 | 8,254,874 | 4  | 0 | 0  | yes |    |
| at_locus.00301 | 1 | 8,267,141 | 8,267,503 | 46 | 1 | 1  | no  | TE |
| at_locus.00302 | 1 | 8,272,495 | 8,272,647 | 6  | 0 | 0  | yes |    |
| at_locus.00303 | 1 | 8,276,503 | 8,276,833 | 11 | 0 | 0  | yes | TE |



|                |   |           |           |    |   |    |     |    |
|----------------|---|-----------|-----------|----|---|----|-----|----|
| at_locus.00304 | 1 | 8,276,994 | 8,277,599 | 11 | 2 | 5  | yes | TE |
| at_locus.00305 | 1 | 8,282,974 | 8,283,394 | 8  | 0 | 4  | yes |    |
| at_locus.00306 | 1 | 8,289,749 | 8,289,993 | 21 | 0 | 0  | yes | TE |
| at_locus.00307 | 1 | 8,290,499 | 8,290,867 | 41 | 0 | 1  | no  | TE |
| at_locus.00308 | 1 | 8,291,475 | 8,291,514 | 7  | 0 | 0  | no  | TE |
| at_locus.00309 | 1 | 8,389,446 | 8,390,141 | 4  | 0 | 2  | yes |    |
| at_locus.00310 | 1 | 8,409,048 | 8,409,327 | 3  | 0 | 4  | yes |    |
| at_locus.00311 | 1 | 8,453,507 | 8,453,801 | 14 | 0 | 8  | no  | TE |
| at_locus.00312 | 1 | 8,454,416 | 8,454,879 | 3  | 0 | 5  | yes | TE |
| at_locus.00313 | 1 | 8,455,296 | 8,456,319 | 5  | 0 | 8  | no  | TE |
| at_locus.00314 | 1 | 8,456,742 | 8,457,272 | 8  | 0 | 6  | no  | TE |
| at_locus.00315 | 1 | 8,457,676 | 8,458,046 | 4  | 0 | 8  | no  | TE |
| at_locus.00316 | 1 | 8,458,524 | 8,458,656 | 4  | 0 | 3  | no  | TE |
| at_locus.00317 | 1 | 8,459,401 | 8,459,524 | 5  | 0 | 0  | no  | TE |
| at_locus.00318 | 1 | 8,460,013 | 8,460,318 | 4  | 0 | 0  | no  | TE |
| at_locus.00319 | 1 | 8,460,328 | 8,460,794 | 0  | 1 | 7  | no  | TE |
| at_locus.00320 | 1 | 8,461,176 | 8,461,525 | 3  | 0 | 5  | no  | TE |
| at_locus.00321 | 1 | 8,471,960 | 8,471,984 | 6  | 0 | 0  | yes | TE |
| at_locus.00322 | 1 | 8,475,148 | 8,475,260 | 4  | 0 | 0  | yes | TE |
| at_locus.00323 | 1 | 8,489,626 | 8,489,838 | 14 | 0 | 0  | no  | TE |
| at_locus.00324 | 1 | 8,490,108 | 8,490,415 | 13 | 0 | 0  | no  | TE |
| at_locus.00325 | 1 | 8,513,203 | 8,513,969 | 27 | 0 | 20 | yes |    |
| at_locus.00326 | 1 | 8,525,082 | 8,525,197 | 2  | 4 | 4  | yes |    |
| at_locus.00327 | 1 | 8,539,603 | 8,539,750 | 13 | 0 | 0  | no  | TE |
| at_locus.00328 | 1 | 8,566,582 | 8,566,602 | 4  | 0 | 0  | yes |    |
| at_locus.00329 | 1 | 8,577,092 | 8,577,180 | 7  | 0 | 0  | yes | TE |
| at_locus.00330 | 1 | 8,590,774 | 8,591,329 | 6  | 0 | 9  | yes |    |
| at_locus.00331 | 1 | 8,622,843 | 8,622,960 | 11 | 0 | 0  | no  | TE |
| at_locus.00332 | 1 | 8,646,697 | 8,647,090 | 0  | 0 | 4  | no  |    |
| at_locus.00333 | 1 | 8,673,719 | 8,674,394 | 17 | 0 | 1  | yes |    |
| at_locus.00334 | 1 | 8,708,381 | 8,708,559 | 4  | 0 | 0  | no  |    |
| at_locus.00335 | 1 | 8,730,843 | 8,731,074 | 1  | 0 | 5  | yes | TE |
| at_locus.00336 | 1 | 8,733,440 | 8,733,523 | 5  | 0 | 0  | yes |    |
| at_locus.00337 | 1 | 8,756,414 | 8,756,437 | 1  | 1 | 5  | yes |    |
| at_locus.00338 | 1 | 8,764,697 | 8,764,736 | 4  | 0 | 0  | yes |    |
| at_locus.00339 | 1 | 8,765,568 | 8,765,888 | 19 | 0 | 2  | no  |    |
| at_locus.00340 | 1 | 8,766,107 | 8,766,271 | 13 | 0 | 0  | no  |    |

|                |   |           |           |    |   |    |     |    |
|----------------|---|-----------|-----------|----|---|----|-----|----|
| at_locus.00341 | 1 | 8,766,530 | 8,767,473 | 27 | 0 | 20 | no  |    |
| at_locus.00342 | 1 | 8,771,951 | 8,772,015 | 0  | 0 | 5  | no  |    |
| at_locus.00343 | 1 | 8,772,053 | 8,773,173 | 12 | 0 | 9  | no  |    |
| at_locus.00344 | 1 | 8,774,049 | 8,774,620 | 9  | 0 | 2  | no  |    |
| at_locus.00345 | 1 | 8,775,236 | 8,775,774 | 6  | 1 | 1  | no  |    |
| at_locus.00346 | 1 | 8,778,187 | 8,779,001 | 6  | 0 | 4  | no  | TE |
| at_locus.00347 | 1 | 8,779,948 | 8,780,268 | 19 | 0 | 3  | no  |    |
| at_locus.00348 | 1 | 8,780,487 | 8,780,651 | 13 | 0 | 0  | no  |    |
| at_locus.00349 | 1 | 8,780,910 | 8,781,853 | 27 | 0 | 20 | no  |    |
| at_locus.00350 | 1 | 8,786,330 | 8,786,394 | 0  | 0 | 5  | no  |    |
| at_locus.00351 | 1 | 8,786,432 | 8,787,552 | 12 | 0 | 9  | no  |    |
| at_locus.00352 | 1 | 8,788,428 | 8,788,999 | 9  | 0 | 2  | no  |    |
| at_locus.00353 | 1 | 8,789,615 | 8,790,288 | 9  | 1 | 2  | no  | TE |
| at_locus.00354 | 1 | 8,791,692 | 8,792,049 | 4  | 0 | 1  | no  | TE |
| at_locus.00355 | 1 | 8,792,762 | 8,793,242 | 5  | 0 | 1  | yes | TE |
| at_locus.00356 | 1 | 8,793,639 | 8,793,993 | 8  | 0 | 7  | no  | TE |
| at_locus.00357 | 1 | 8,794,220 | 8,795,181 | 14 | 0 | 6  | yes | TE |
| at_locus.00358 | 1 | 8,797,213 | 8,797,939 | 15 | 0 | 13 | no  | TE |
| at_locus.00359 | 1 | 8,798,028 | 8,798,342 | 8  | 1 | 1  | yes | TE |
| at_locus.00360 | 1 | 8,800,715 | 8,801,529 | 6  | 0 | 4  | no  | TE |
| at_locus.00361 | 1 | 8,802,476 | 8,802,796 | 19 | 0 | 3  | no  |    |
| at_locus.00362 | 1 | 8,803,015 | 8,803,179 | 13 | 0 | 0  | no  |    |
| at_locus.00363 | 1 | 8,803,438 | 8,804,381 | 27 | 0 | 20 | no  |    |
| at_locus.00364 | 1 | 8,808,859 | 8,808,923 | 0  | 0 | 5  | no  |    |
| at_locus.00365 | 1 | 8,808,961 | 8,810,081 | 12 | 0 | 9  | no  |    |
| at_locus.00366 | 1 | 8,810,957 | 8,811,528 | 9  | 0 | 2  | no  |    |
| at_locus.00367 | 1 | 8,812,144 | 8,812,722 | 7  | 1 | 1  | no  |    |
| at_locus.00368 | 1 | 8,815,093 | 8,815,907 | 6  | 0 | 4  | no  | TE |
| at_locus.00369 | 1 | 8,816,854 | 8,817,174 | 19 | 0 | 3  | no  |    |
| at_locus.00370 | 1 | 8,817,393 | 8,817,557 | 13 | 0 | 0  | no  |    |
| at_locus.00371 | 1 | 8,817,816 | 8,818,759 | 27 | 0 | 20 | no  |    |
| at_locus.00372 | 1 | 8,823,237 | 8,823,301 | 0  | 0 | 5  | no  |    |
| at_locus.00373 | 1 | 8,823,339 | 8,824,459 | 12 | 0 | 9  | no  |    |
| at_locus.00374 | 1 | 8,825,335 | 8,825,906 | 9  | 0 | 2  | no  |    |
| at_locus.00375 | 1 | 8,826,522 | 8,827,100 | 7  | 1 | 1  | no  |    |
| at_locus.00376 | 1 | 8,829,471 | 8,830,285 | 6  | 0 | 4  | no  | TE |
| at_locus.00377 | 1 | 8,831,519 | 8,831,552 | 17 | 0 | 2  | no  |    |

|                |   |           |           |    |   |    |     |    |
|----------------|---|-----------|-----------|----|---|----|-----|----|
| at_locus.00378 | 1 | 8,831,771 | 8,831,935 | 13 | 0 | 0  | no  |    |
| at_locus.00379 | 1 | 8,832,194 | 8,833,137 | 27 | 0 | 20 | no  |    |
| at_locus.00380 | 1 | 8,837,615 | 8,837,679 | 0  | 0 | 5  | no  |    |
| at_locus.00381 | 1 | 8,869,657 | 8,869,793 | 7  | 1 | 2  | yes | TE |
| at_locus.00382 | 1 | 8,869,968 | 8,870,167 | 0  | 0 | 4  | yes |    |
| at_locus.00383 | 1 | 8,870,215 | 8,870,349 | 5  | 1 | 0  | yes |    |
| at_locus.00384 | 1 | 9,004,821 | 9,005,214 | 28 | 1 | 1  | no  | TE |
| at_locus.00385 | 1 | 9,005,358 | 9,005,813 | 5  | 0 | 14 | no  | TE |
| at_locus.00386 | 1 | 9,005,999 | 9,006,331 | 5  | 0 | 4  | no  | TE |
| at_locus.00387 | 1 | 9,006,730 | 9,007,977 | 8  | 0 | 24 | no  | TE |
| at_locus.00388 | 1 | 9,008,362 | 9,009,714 | 16 | 0 | 20 | no  | TE |
| at_locus.00389 | 1 | 9,009,934 | 9,010,776 | 7  | 0 | 13 | no  | TE |
| at_locus.00390 | 1 | 9,011,165 | 9,011,712 | 8  | 0 | 7  | no  | TE |
| at_locus.00391 | 1 | 9,012,300 | 9,012,659 | 4  | 0 | 1  | yes | TE |
| at_locus.00392 | 1 | 9,013,447 | 9,013,567 | 1  | 0 | 4  | no  | TE |
| at_locus.00393 | 1 | 9,013,943 | 9,014,624 | 10 | 0 | 5  | no  | TE |
| at_locus.00394 | 1 | 9,014,672 | 9,015,573 | 7  | 1 | 22 | no  | TE |
| at_locus.00395 | 1 | 9,018,125 | 9,018,414 | 1  | 1 | 7  | yes |    |
| at_locus.00396 | 1 | 9,062,232 | 9,062,482 | 5  | 0 | 2  | no  | TE |
| at_locus.00397 | 1 | 9,077,656 | 9,077,751 | 5  | 0 | 0  | yes | TE |
| at_locus.00398 | 1 | 9,082,716 | 9,082,946 | 9  | 0 | 0  | yes |    |
| at_locus.00399 | 1 | 9,174,280 | 9,174,533 | 13 | 0 | 1  | yes |    |
| at_locus.00400 | 1 | 9,175,614 | 9,175,837 | 2  | 0 | 4  | no  | TE |
| at_locus.00401 | 1 | 9,188,662 | 9,188,861 | 6  | 0 | 0  | yes |    |
| at_locus.00402 | 1 | 9,205,079 | 9,205,414 | 23 | 0 | 19 | yes |    |
| at_locus.00403 | 1 | 9,235,927 | 9,237,087 | 18 | 0 | 6  | yes | TE |
| at_locus.00404 | 1 | 9,304,766 | 9,305,381 | 34 | 1 | 0  | yes | TE |
| at_locus.00405 | 1 | 9,357,871 | 9,357,982 | 5  | 0 | 0  | yes |    |
| at_locus.00406 | 1 | 9,370,786 | 9,370,980 | 5  | 0 | 3  | yes | TE |
| at_locus.00407 | 1 | 9,384,182 | 9,384,296 | 10 | 0 | 0  | no  | TE |
| at_locus.00408 | 1 | 9,384,991 | 9,385,018 | 4  | 0 | 0  | no  | TE |
| at_locus.00409 | 1 | 9,418,020 | 9,418,264 | 5  | 0 | 0  | yes | TE |
| at_locus.00410 | 1 | 9,418,877 | 9,418,932 | 5  | 0 | 0  | yes | TE |
| at_locus.00411 | 1 | 9,550,687 | 9,550,725 | 4  | 0 | 0  | no  | TE |
| at_locus.00412 | 1 | 9,564,609 | 9,565,019 | 10 | 0 | 4  | yes |    |
| at_locus.00413 | 1 | 9,579,099 | 9,579,387 | 4  | 0 | 3  | yes |    |
| at_locus.00414 | 1 | 9,583,302 | 9,583,617 | 4  | 0 | 1  | yes | TE |

|                |   |           |           |    |   |    |     |    |
|----------------|---|-----------|-----------|----|---|----|-----|----|
| at_locus.00415 | 1 | 9,587,202 | 9,587,410 | 6  | 0 | 0  | yes | TE |
| at_locus.00416 | 1 | 9,629,800 | 9,630,675 | 11 | 0 | 11 | yes | TE |
| at_locus.00417 | 1 | 9,676,488 | 9,677,571 | 20 | 1 | 28 | yes | TE |
| at_locus.00418 | 1 | 9,677,619 | 9,678,300 | 10 | 0 | 5  | no  | TE |
| at_locus.00419 | 1 | 9,680,235 | 9,680,285 | 2  | 0 | 4  | no  | TE |
| at_locus.00420 | 1 | 9,680,532 | 9,680,731 | 1  | 0 | 6  | yes | TE |
| at_locus.00421 | 1 | 9,680,869 | 9,681,078 | 5  | 0 | 1  | no  | TE |
| at_locus.00422 | 1 | 9,681,467 | 9,681,714 | 2  | 0 | 8  | no  | TE |
| at_locus.00423 | 1 | 9,682,211 | 9,682,753 | 1  | 0 | 5  | yes | TE |
| at_locus.00424 | 1 | 9,683,103 | 9,683,427 | 4  | 0 | 4  | no  | TE |
| at_locus.00425 | 1 | 9,683,740 | 9,684,384 | 0  | 0 | 7  | no  | TE |
| at_locus.00426 | 1 | 9,685,608 | 9,686,376 | 8  | 0 | 17 | no  | TE |
| at_locus.00427 | 1 | 9,686,675 | 9,687,787 | 14 | 0 | 13 | yes | TE |
| at_locus.00428 | 1 | 9,688,091 | 9,689,337 | 8  | 0 | 23 | no  | TE |
| at_locus.00429 | 1 | 9,689,736 | 9,690,046 | 4  | 0 | 4  | no  | TE |
| at_locus.00430 | 1 | 9,690,254 | 9,690,709 | 5  | 0 | 14 | no  | TE |
| at_locus.00431 | 1 | 9,691,005 | 9,691,224 | 25 | 1 | 1  | no  | TE |
| at_locus.00432 | 1 | 9,706,342 | 9,706,398 | 5  | 0 | 0  | yes |    |
| at_locus.00433 | 1 | 9,706,667 | 9,707,123 | 12 | 0 | 1  | yes | TE |
| at_locus.00434 | 1 | 9,707,782 | 9,708,188 | 13 | 0 | 5  | yes |    |
| at_locus.00435 | 1 | 9,740,815 | 9,740,872 | 0  | 4 | 0  | yes |    |
| at_locus.00436 | 1 | 9,754,453 | 9,754,572 | 22 | 0 | 4  | yes |    |
| at_locus.00437 | 1 | 9,754,781 | 9,754,888 | 20 | 0 | 0  | yes |    |
| at_locus.00438 | 1 | 9,755,101 | 9,755,211 | 22 | 0 | 4  | no  |    |
| at_locus.00439 | 1 | 9,755,450 | 9,755,522 | 11 | 0 | 4  | yes |    |
| at_locus.00440 | 1 | 9,755,737 | 9,755,847 | 20 | 1 | 4  | yes |    |
| at_locus.00441 | 1 | 9,756,068 | 9,756,162 | 16 | 0 | 2  | yes |    |
| at_locus.00442 | 1 | 9,756,396 | 9,756,960 | 21 | 0 | 9  | yes |    |
| at_locus.00443 | 1 | 9,759,840 | 9,760,117 | 6  | 0 | 3  | yes |    |
| at_locus.00444 | 1 | 9,762,613 | 9,762,719 | 5  | 0 | 0  | yes | TE |
| at_locus.00445 | 1 | 9,811,788 | 9,812,008 | 13 | 0 | 0  | yes |    |
| at_locus.00446 | 1 | 9,812,263 | 9,812,335 | 8  | 0 | 0  | yes |    |
| at_locus.00447 | 1 | 9,816,197 | 9,816,282 | 14 | 0 | 0  | no  | TE |
| at_locus.00448 | 1 | 9,816,962 | 9,817,232 | 8  | 0 | 0  | no  | TE |
| at_locus.00449 | 1 | 9,817,459 | 9,818,142 | 61 | 3 | 2  | no  | TE |
| at_locus.00450 | 1 | 9,837,395 | 9,837,566 | 5  | 0 | 1  | no  | TE |
| at_locus.00451 | 1 | 9,862,687 | 9,862,978 | 16 | 0 | 0  | no  | TE |

|                |   |            |            |    |    |    |     |    |
|----------------|---|------------|------------|----|----|----|-----|----|
| at_locus.00452 | 1 | 9,865,553  | 9,866,015  | 21 | 1  | 0  | no  | TE |
| at_locus.00453 | 1 | 9,866,360  | 9,866,703  | 9  | 0  | 0  | no  | TE |
| at_locus.00454 | 1 | 9,867,316  | 9,867,401  | 16 | 0  | 0  | no  | TE |
| at_locus.00455 | 1 | 9,883,984  | 9,884,058  | 13 | 0  | 0  | yes |    |
| at_locus.00456 | 1 | 9,918,442  | 9,918,686  | 5  | 0  | 0  | no  | TE |
| at_locus.00457 | 1 | 9,919,238  | 9,919,317  | 23 | 0  | 1  | no  | TE |
| at_locus.00458 | 1 | 9,956,725  | 9,956,854  | 7  | 1  | 0  | yes |    |
| at_locus.00459 | 1 | 9,958,191  | 9,958,295  | 4  | 0  | 0  | yes |    |
| at_locus.00460 | 1 | 10,013,165 | 10,013,463 | 8  | 0  | 0  | yes |    |
| at_locus.00461 | 1 | 10,021,402 | 10,021,613 | 8  | 0  | 0  | no  | TE |
| at_locus.00462 | 1 | 10,022,831 | 10,023,505 | 10 | 0  | 43 | yes |    |
| at_locus.00463 | 1 | 10,062,760 | 10,062,960 | 4  | 0  | 0  | yes |    |
| at_locus.00464 | 1 | 10,064,400 | 10,064,661 | 8  | 0  | 1  | yes |    |
| at_locus.00465 | 1 | 10,152,712 | 10,152,924 | 6  | 0  | 0  | yes | TE |
| at_locus.00466 | 1 | 10,153,142 | 10,153,312 | 4  | 0  | 0  | yes | TE |
| at_locus.00467 | 1 | 10,153,514 | 10,154,038 | 17 | 0  | 17 | yes | TE |
| at_locus.00468 | 1 | 10,173,206 | 10,173,289 | 4  | 0  | 0  | yes |    |
| at_locus.00469 | 1 | 10,196,831 | 10,197,311 | 15 | 0  | 9  | yes |    |
| at_locus.00470 | 1 | 10,206,724 | 10,206,959 | 4  | 0  | 0  | yes | TE |
| at_locus.00472 | 1 | 10,300,343 | 10,301,001 | 7  | 13 | 36 | yes |    |
| at_locus.00473 | 1 | 10,309,121 | 10,309,384 | 0  | 6  | 13 | no  |    |
| at_locus.00474 | 1 | 10,347,096 | 10,347,319 | 10 | 0  | 1  | no  | TE |
| at_locus.00475 | 1 | 10,347,387 | 10,347,784 | 0  | 0  | 9  | no  | TE |
| at_locus.00476 | 1 | 10,347,867 | 10,348,502 | 12 | 0  | 0  | no  | TE |
| at_locus.00477 | 1 | 10,383,377 | 10,383,586 | 0  | 0  | 4  | yes |    |
| at_locus.00478 | 1 | 10,383,924 | 10,384,293 | 8  | 0  | 9  | yes |    |
| at_locus.00479 | 1 | 10,421,497 | 10,421,652 | 10 | 0  | 1  | yes | TE |
| at_locus.00480 | 1 | 10,478,008 | 10,478,921 | 1  | 18 | 3  | yes |    |
| at_locus.00481 | 1 | 10,526,168 | 10,526,555 | 37 | 2  | 4  | no  | TE |
| at_locus.00482 | 1 | 10,526,937 | 10,527,185 | 20 | 0  | 0  | no  | TE |
| at_locus.00483 | 1 | 10,527,933 | 10,528,767 | 15 | 0  | 14 | yes | TE |
| at_locus.00484 | 1 | 10,533,808 | 10,534,071 | 4  | 0  | 0  | yes | TE |
| at_locus.00485 | 1 | 10,579,410 | 10,579,437 | 4  | 0  | 0  | no  | TE |
| at_locus.00486 | 1 | 10,579,975 | 10,580,123 | 19 | 0  | 0  | no  | TE |
| at_locus.00487 | 1 | 10,591,527 | 10,591,938 | 7  | 1  | 1  | no  | TE |
| at_locus.00488 | 1 | 10,659,982 | 10,660,555 | 12 | 1  | 23 | yes |    |
| at_locus.00489 | 1 | 10,724,238 | 10,724,527 | 2  | 0  | 4  | no  | TE |

|                |   |            |            |    |     |    |     |    |
|----------------|---|------------|------------|----|-----|----|-----|----|
| at_locus.00491 | 1 | 10,776,831 | 10,776,943 | 5  | 0   | 7  | yes |    |
| at_locus.00492 | 1 | 10,777,199 | 10,777,222 | 4  | 0   | 0  | yes |    |
| at_locus.00493 | 1 | 10,777,249 | 10,777,524 | 0  | 0   | 6  | yes |    |
| at_locus.00494 | 1 | 10,802,262 | 10,803,306 | 28 | 2   | 2  | yes | TE |
| at_locus.00495 | 1 | 10,814,299 | 10,814,478 | 9  | 0   | 0  | yes |    |
| at_locus.00496 | 1 | 10,840,385 | 10,840,406 | 0  | 4   | 0  | no  |    |
| at_locus.00497 | 1 | 10,853,074 | 10,853,135 | 19 | 0   | 0  | yes | TE |
| at_locus.00498 | 1 | 10,915,797 | 10,915,863 | 4  | 0   | 1  | yes | TE |
| at_locus.00499 | 1 | 10,924,665 | 10,924,921 | 16 | 0   | 0  | yes |    |
| at_locus.00500 | 1 | 10,929,408 | 10,929,592 | 5  | 0   | 0  | no  | TE |
| at_locus.00501 | 1 | 10,930,640 | 10,931,452 | 16 | 0   | 1  | no  | TE |
| at_locus.00502 | 1 | 10,931,810 | 10,931,985 | 5  | 0   | 0  | yes | TE |
| at_locus.00503 | 1 | 11,005,873 | 11,006,149 | 4  | 0   | 0  | no  |    |
| at_locus.00504 | 1 | 11,020,220 | 11,020,728 | 7  | 0   | 14 | yes |    |
| at_locus.00505 | 1 | 11,028,424 | 11,028,459 | 1  | 0   | 4  | yes |    |
| at_locus.00506 | 1 | 11,045,354 | 11,045,496 | 4  | 0   | 0  | yes |    |
| at_locus.00507 | 1 | 11,048,680 | 11,049,388 | 20 | 0   | 2  | yes | TE |
| at_locus.00508 | 1 | 11,049,650 | 11,050,745 | 22 | 1   | 24 | yes | TE |
| at_locus.00509 | 1 | 11,050,944 | 11,051,434 | 5  | 0   | 0  | yes | TE |
| at_locus.00510 | 1 | 11,083,083 | 11,083,153 | 8  | 0   | 0  | yes |    |
| at_locus.00511 | 1 | 11,117,559 | 11,117,626 | 5  | 0   | 0  | yes |    |
| at_locus.00512 | 1 | 11,126,391 | 11,127,210 | 15 | 0   | 10 | yes | TE |
| at_locus.00513 | 1 | 11,128,991 | 11,129,218 | 17 | 0   | 0  | yes |    |
| at_locus.00514 | 1 | 11,132,675 | 11,132,790 | 7  | 0   | 0  | yes | TE |
| at_locus.00515 | 1 | 11,137,537 | 11,137,558 | 28 | 141 | 79 | yes |    |
| at_locus.00516 | 1 | 11,139,691 | 11,140,202 | 96 | 3   | 51 | yes |    |
| at_locus.00517 | 1 | 11,148,183 | 11,148,358 | 12 | 0   | 0  | no  |    |
| at_locus.00518 | 1 | 11,150,826 | 11,150,854 | 5  | 0   | 0  | no  | TE |
| at_locus.00519 | 1 | 11,152,613 | 11,152,807 | 17 | 1   | 1  | no  |    |
| at_locus.00520 | 1 | 11,174,191 | 11,174,279 | 23 | 0   | 0  | no  | TE |
| at_locus.00521 | 1 | 11,174,658 | 11,174,787 | 4  | 0   | 0  | no  | TE |
| at_locus.00522 | 1 | 11,185,205 | 11,185,224 | 4  | 34  | 24 | no  |    |
| at_locus.00523 | 1 | 11,192,381 | 11,192,400 | 1  | 16  | 13 | yes |    |
| at_locus.00524 | 1 | 11,204,447 | 11,204,586 | 7  | 0   | 0  | yes | TE |
| at_locus.00525 | 1 | 11,241,655 | 11,242,032 | 6  | 0   | 2  | yes | TE |
| at_locus.00526 | 1 | 11,259,508 | 11,259,652 | 4  | 0   | 0  | yes |    |
| at_locus.00527 | 1 | 11,279,837 | 11,280,204 | 18 | 2   | 3  | yes |    |

|                |   |            |            |     |   |     |     |    |
|----------------|---|------------|------------|-----|---|-----|-----|----|
| at_locus.00528 | 1 | 11,284,671 | 11,284,694 | 4   | 0 | 0   | yes |    |
| at_locus.00529 | 1 | 11,286,630 | 11,286,675 | 12  | 0 | 0   | no  | TE |
| at_locus.00530 | 1 | 11,286,950 | 11,287,655 | 57  | 2 | 7   | no  | TE |
| at_locus.00531 | 1 | 11,301,037 | 11,301,686 | 5   | 0 | 2   | no  | TE |
| at_locus.00532 | 1 | 11,308,897 | 11,308,924 | 1   | 0 | 4   | yes | TE |
| at_locus.00533 | 1 | 11,315,147 | 11,315,193 | 10  | 0 | 0   | no  | TE |
| at_locus.00534 | 1 | 11,319,356 | 11,319,384 | 4   | 0 | 2   | no  |    |
| at_locus.00535 | 1 | 11,352,294 | 11,352,358 | 7   | 0 | 0   | yes | TE |
| at_locus.00536 | 1 | 11,370,883 | 11,371,072 | 12  | 0 | 2   | yes |    |
| at_locus.00537 | 1 | 11,408,064 | 11,409,305 | 34  | 0 | 6   | no  | TE |
| at_locus.00538 | 1 | 11,409,705 | 11,409,821 | 6   | 0 | 1   | no  | TE |
| at_locus.00539 | 1 | 11,410,112 | 11,410,174 | 10  | 0 | 1   | no  | TE |
| at_locus.00540 | 1 | 11,428,207 | 11,428,290 | 5   | 0 | 0   | no  | TE |
| at_locus.00541 | 1 | 11,440,844 | 11,441,394 | 22  | 0 | 10  | yes |    |
| at_locus.00542 | 1 | 11,521,897 | 11,522,363 | 6   | 0 | 0   | yes | TE |
| at_locus.00543 | 1 | 11,525,924 | 11,526,168 | 1   | 0 | 6   | yes | TE |
| at_locus.00544 | 1 | 11,550,962 | 11,551,005 | 8   | 0 | 0   | yes |    |
| at_locus.00545 | 1 | 11,585,738 | 11,585,923 | 0   | 0 | 4   | yes |    |
| at_locus.00546 | 1 | 11,585,925 | 11,586,235 | 15  | 0 | 0   | yes |    |
| at_locus.00547 | 1 | 11,609,956 | 11,610,033 | 8   | 0 | 0   | no  |    |
| at_locus.00548 | 1 | 11,610,238 | 11,610,542 | 1   | 0 | 6   | yes |    |
| at_locus.00549 | 1 | 11,618,461 | 11,618,893 | 33  | 0 | 11  | yes |    |
| at_locus.00550 | 1 | 11,619,109 | 11,619,597 | 236 | 2 | 358 | yes |    |
| at_locus.00551 | 1 | 11,620,596 | 11,620,764 | 5   | 1 | 0   | yes |    |
| at_locus.00552 | 1 | 11,637,055 | 11,637,120 | 5   | 0 | 0   | yes |    |
| at_locus.00553 | 1 | 11,644,153 | 11,644,345 | 10  | 0 | 0   | yes |    |
| at_locus.00554 | 1 | 11,661,133 | 11,661,183 | 8   | 0 | 0   | yes |    |
| at_locus.00555 | 1 | 11,661,395 | 11,661,449 | 7   | 0 | 0   | yes |    |
| at_locus.00556 | 1 | 11,661,770 | 11,662,277 | 12  | 0 | 2   | yes |    |
| at_locus.00557 | 1 | 11,669,436 | 11,669,552 | 16  | 0 | 0   | no  | TE |
| at_locus.00558 | 1 | 11,700,393 | 11,701,709 | 68  | 3 | 1   | no  | TE |
| at_locus.00559 | 1 | 11,703,993 | 11,704,114 | 16  | 0 | 0   | no  | TE |
| at_locus.00560 | 1 | 11,704,390 | 11,704,983 | 6   | 0 | 4   | no  | TE |
| at_locus.00561 | 1 | 11,706,550 | 11,706,599 | 6   | 0 | 0   | no  | TE |
| at_locus.00562 | 1 | 11,706,863 | 11,707,011 | 5   | 0 | 1   | no  | TE |
| at_locus.00563 | 1 | 11,707,411 | 11,707,816 | 4   | 0 | 6   | no  | TE |
| at_locus.00564 | 1 | 11,707,878 | 11,708,592 | 15  | 0 | 1   | no  | TE |

|                |   |            |            |    |   |    |     |    |
|----------------|---|------------|------------|----|---|----|-----|----|
| at_locus.00565 | 1 | 11,721,050 | 11,721,393 | 4  | 0 | 0  | yes | TE |
| at_locus.00566 | 1 | 11,732,367 | 11,732,800 | 10 | 0 | 2  | yes | TE |
| at_locus.00567 | 1 | 11,735,832 | 11,736,134 | 20 | 0 | 1  | no  | TE |
| at_locus.00568 | 1 | 11,736,352 | 11,736,656 | 9  | 0 | 0  | no  | TE |
| at_locus.00569 | 1 | 11,737,288 | 11,737,373 | 10 | 0 | 0  | no  | TE |
| at_locus.00570 | 1 | 11,740,670 | 11,740,734 | 50 | 0 | 0  | yes |    |
| at_locus.00571 | 1 | 11,753,135 | 11,753,728 | 6  | 1 | 14 | no  | TE |
| at_locus.00572 | 1 | 11,754,735 | 11,754,768 | 9  | 0 | 1  | no  | TE |
| at_locus.00573 | 1 | 11,785,926 | 11,785,948 | 5  | 7 | 9  | no  |    |
| at_locus.00574 | 1 | 11,789,516 | 11,789,701 | 8  | 0 | 1  | no  | TE |
| at_locus.00575 | 1 | 11,793,871 | 11,794,056 | 8  | 0 | 1  | no  | TE |
| at_locus.00576 | 1 | 11,822,272 | 11,822,413 | 11 | 0 | 0  | yes |    |
| at_locus.00577 | 1 | 11,834,629 | 11,834,852 | 11 | 0 | 2  | no  | TE |
| at_locus.00578 | 1 | 11,834,986 | 11,835,317 | 0  | 0 | 7  | no  | TE |
| at_locus.00579 | 1 | 11,835,400 | 11,836,035 | 10 | 0 | 1  | yes | TE |
| at_locus.00580 | 1 | 11,871,428 | 11,871,458 | 4  | 0 | 0  | yes |    |
| at_locus.00581 | 1 | 11,880,037 | 11,880,280 | 12 | 1 | 11 | yes |    |
| at_locus.00582 | 1 | 11,880,450 | 11,880,790 | 4  | 0 | 2  | yes |    |
| at_locus.00583 | 1 | 11,887,187 | 11,887,599 | 8  | 0 | 3  | no  | TE |
| at_locus.00584 | 1 | 11,891,446 | 11,891,475 | 1  | 0 | 4  | no  | TE |
| at_locus.00585 | 1 | 11,891,952 | 11,892,149 | 5  | 0 | 1  | no  | TE |
| at_locus.00586 | 1 | 11,893,279 | 11,893,372 | 1  | 0 | 5  | no  | TE |
| at_locus.00587 | 1 | 11,895,763 | 11,895,902 | 7  | 0 | 0  | no  | TE |
| at_locus.00588 | 1 | 11,897,025 | 11,897,485 | 9  | 0 | 6  | no  | TE |
| at_locus.00589 | 1 | 11,898,318 | 11,898,835 | 5  | 0 | 2  | no  | TE |
| at_locus.00590 | 1 | 11,900,152 | 11,900,280 | 5  | 0 | 4  | no  | TE |
| at_locus.00591 | 1 | 11,900,827 | 11,901,617 | 47 | 0 | 23 | no  | TE |
| at_locus.00592 | 1 | 11,953,531 | 11,953,676 | 15 | 0 | 0  | yes |    |
| at_locus.00593 | 1 | 11,957,467 | 11,957,689 | 0  | 5 | 1  | yes |    |
| at_locus.00594 | 1 | 11,957,920 | 11,958,940 | 20 | 0 | 3  | yes | TE |
| at_locus.00595 | 1 | 11,960,662 | 11,960,963 | 4  | 0 | 1  | yes | TE |
| at_locus.00596 | 1 | 11,982,714 | 11,983,345 | 54 | 0 | 19 | yes | TE |
| at_locus.00597 | 1 | 11,984,311 | 11,985,107 | 41 | 0 | 3  | yes |    |
| at_locus.00598 | 1 | 11,987,808 | 11,987,843 | 4  | 0 | 0  | no  | TE |
| at_locus.00599 | 1 | 12,016,489 | 12,017,032 | 1  | 0 | 6  | yes | TE |
| at_locus.00600 | 1 | 12,034,222 | 12,034,384 | 5  | 0 | 3  | yes |    |
| at_locus.00601 | 1 | 12,035,792 | 12,036,652 | 14 | 2 | 47 | yes |    |



|                |   |            |            |    |    |    |     |    |
|----------------|---|------------|------------|----|----|----|-----|----|
| at_locus.00602 | 1 | 12,037,132 | 12,037,936 | 5  | 0  | 18 | yes |    |
| at_locus.00603 | 1 | 12,077,602 | 12,077,659 | 0  | 0  | 4  | yes |    |
| at_locus.00604 | 1 | 12,078,139 | 12,078,255 | 7  | 2  | 1  | no  |    |
| at_locus.00605 | 1 | 12,078,566 | 12,079,117 | 1  | 0  | 4  | yes |    |
| at_locus.00606 | 1 | 12,080,586 | 12,080,906 | 36 | 1  | 2  | yes | TE |
| at_locus.00607 | 1 | 12,083,832 | 12,084,037 | 10 | 0  | 12 | yes |    |
| at_locus.00609 | 1 | 12,137,433 | 12,137,778 | 10 | 0  | 0  | yes | TE |
| at_locus.00610 | 1 | 12,138,854 | 12,139,190 | 14 | 0  | 2  | no  | TE |
| at_locus.00611 | 1 | 12,139,780 | 12,139,912 | 4  | 0  | 0  | no  | TE |
| at_locus.00612 | 1 | 12,142,420 | 12,143,180 | 17 | 0  | 5  | yes | TE |
| at_locus.00613 | 1 | 12,166,719 | 12,167,005 | 4  | 0  | 1  | yes | TE |
| at_locus.00614 | 1 | 12,176,530 | 12,176,869 | 1  | 0  | 4  | yes | TE |
| at_locus.00615 | 1 | 12,183,707 | 12,183,969 | 7  | 0  | 1  | yes | TE |
| at_locus.00616 | 1 | 12,186,767 | 12,187,351 | 11 | 0  | 11 | yes |    |
| at_locus.00617 | 1 | 12,218,713 | 12,218,900 | 4  | 0  | 0  | yes |    |
| at_locus.00618 | 1 | 12,240,397 | 12,240,894 | 28 | 0  | 0  | yes | TE |
| at_locus.00619 | 1 | 12,247,542 | 12,247,976 | 25 | 0  | 18 | yes |    |
| at_locus.00620 | 1 | 12,249,044 | 12,249,462 | 5  | 0  | 0  | yes |    |
| at_locus.00621 | 1 | 12,263,023 | 12,263,668 | 18 | 0  | 20 | yes | TE |
| at_locus.00622 | 1 | 12,277,489 | 12,277,541 | 10 | 1  | 0  | yes |    |
| at_locus.00623 | 1 | 12,286,641 | 12,287,202 | 14 | 0  | 5  | yes | TE |
| at_locus.00624 | 1 | 12,293,705 | 12,293,732 | 1  | 8  | 10 | no  |    |
| at_locus.00625 | 1 | 12,294,315 | 12,294,515 | 0  | 1  | 4  | yes |    |
| at_locus.00626 | 1 | 12,294,736 | 12,294,763 | 5  | 34 | 8  | no  |    |
| at_locus.00627 | 1 | 12,303,077 | 12,303,198 | 5  | 0  | 0  | yes |    |
| at_locus.00628 | 1 | 12,328,148 | 12,328,777 | 54 | 0  | 1  | no  | TE |
| at_locus.00629 | 1 | 12,329,029 | 12,329,371 | 8  | 2  | 0  | no  | TE |
| at_locus.00630 | 1 | 12,329,948 | 12,330,033 | 11 | 0  | 0  | no  | TE |
| at_locus.00631 | 1 | 12,333,947 | 12,333,985 | 4  | 0  | 0  | no  | TE |
| at_locus.00632 | 1 | 12,336,765 | 12,337,784 | 11 | 0  | 16 | yes | TE |
| at_locus.00633 | 1 | 12,338,695 | 12,338,871 | 6  | 0  | 4  | yes |    |
| at_locus.00634 | 1 | 12,363,073 | 12,363,805 | 17 | 0  | 12 | yes | TE |
| at_locus.00635 | 1 | 12,364,115 | 12,364,190 | 8  | 0  | 0  | no  | TE |
| at_locus.00636 | 1 | 12,364,823 | 12,365,844 | 47 | 2  | 2  | no  | TE |
| at_locus.00637 | 1 | 12,376,661 | 12,376,829 | 5  | 34 | 10 | yes |    |
| at_locus.00638 | 1 | 12,379,908 | 12,379,990 | 0  | 0  | 4  | yes |    |
| at_locus.00639 | 1 | 12,387,506 | 12,387,567 | 5  | 0  | 0  | yes |    |

|                |   |            |            |    |   |    |     |    |
|----------------|---|------------|------------|----|---|----|-----|----|
| at_locus.00640 | 1 | 12,389,770 | 12,390,030 | 4  | 0 | 0  | yes | TE |
| at_locus.00641 | 1 | 12,457,662 | 12,458,134 | 5  | 0 | 1  | no  | TE |
| at_locus.00642 | 1 | 12,467,738 | 12,468,346 | 8  | 0 | 12 | yes |    |
| at_locus.00643 | 1 | 12,470,279 | 12,471,226 | 12 | 1 | 42 | yes | TE |
| at_locus.00644 | 1 | 12,483,162 | 12,483,373 | 7  | 0 | 0  | yes | TE |
| at_locus.00645 | 1 | 12,510,934 | 12,511,541 | 5  | 1 | 9  | yes |    |
| at_locus.00646 | 1 | 12,514,620 | 12,514,964 | 8  | 0 | 2  | no  | TE |
| at_locus.00647 | 1 | 12,517,266 | 12,517,491 | 10 | 0 | 0  | yes | TE |
| at_locus.00648 | 1 | 12,525,567 | 12,525,636 | 19 | 0 | 0  | no  | TE |
| at_locus.00649 | 1 | 12,526,483 | 12,526,715 | 5  | 0 | 1  | no  | TE |
| at_locus.00650 | 1 | 12,555,985 | 12,556,416 | 11 | 0 | 11 | yes |    |
| at_locus.00651 | 1 | 12,562,209 | 12,562,630 | 16 | 0 | 1  | no  | TE |
| at_locus.00652 | 1 | 12,562,862 | 12,563,755 | 32 | 2 | 0  | no  | TE |
| at_locus.00653 | 1 | 12,563,974 | 12,564,051 | 10 | 0 | 0  | no  | TE |
| at_locus.00654 | 1 | 12,566,265 | 12,566,569 | 14 | 0 | 5  | no  | TE |
| at_locus.00655 | 1 | 12,566,897 | 12,567,471 | 5  | 0 | 8  | yes | TE |
| at_locus.00656 | 1 | 12,568,769 | 12,568,935 | 0  | 0 | 4  | yes |    |
| at_locus.00657 | 1 | 12,572,713 | 12,572,898 | 3  | 0 | 4  | yes | TE |
| at_locus.00658 | 1 | 12,573,785 | 12,573,846 | 4  | 0 | 0  | no  |    |
| at_locus.00659 | 1 | 12,576,297 | 12,576,411 | 6  | 1 | 4  | yes |    |
| at_locus.00660 | 1 | 12,576,912 | 12,577,136 | 4  | 0 | 2  | yes |    |
| at_locus.00661 | 1 | 12,577,657 | 12,578,348 | 13 | 0 | 13 | yes |    |
| at_locus.00662 | 1 | 12,591,092 | 12,591,467 | 9  | 0 | 0  | no  |    |
| at_locus.00663 | 1 | 12,593,040 | 12,593,318 | 6  | 2 | 6  | no  | TE |
| at_locus.00664 | 1 | 12,618,498 | 12,618,678 | 8  | 0 | 0  | yes | TE |
| at_locus.00665 | 1 | 12,619,476 | 12,619,500 | 4  | 0 | 0  | no  | TE |
| at_locus.00666 | 1 | 12,627,207 | 12,627,309 | 2  | 0 | 0  | no  | TE |
| at_locus.00667 | 1 | 12,646,040 | 12,646,108 | 8  | 0 | 0  | yes | TE |
| at_locus.00668 | 1 | 12,651,184 | 12,651,216 | 5  | 0 | 3  | yes |    |
| at_locus.00669 | 1 | 12,662,752 | 12,662,815 | 4  | 0 | 0  | yes | TE |
| at_locus.00670 | 1 | 12,681,280 | 12,681,470 | 0  | 0 | 4  | no  | TE |
| at_locus.00671 | 1 | 12,684,287 | 12,684,581 | 7  | 0 | 5  | no  | TE |
| at_locus.00672 | 1 | 12,691,397 | 12,691,646 | 13 | 0 | 0  | yes | TE |
| at_locus.00673 | 1 | 12,692,449 | 12,692,587 | 4  | 1 | 1  | yes | TE |
| at_locus.00674 | 1 | 12,713,464 | 12,713,705 | 9  | 0 | 0  | no  | TE |
| at_locus.00675 | 1 | 12,714,001 | 12,714,456 | 5  | 0 | 14 | no  | TE |
| at_locus.00676 | 1 | 12,714,642 | 12,714,974 | 5  | 0 | 4  | no  | TE |

|                |   |            |            |     |   |    |     |    |
|----------------|---|------------|------------|-----|---|----|-----|----|
| at_locus.00677 | 1 | 12,715,373 | 12,716,620 | 7   | 0 | 22 | no  | TE |
| at_locus.00678 | 1 | 12,717,086 | 12,719,082 | 22  | 0 | 29 | no  | TE |
| at_locus.00679 | 1 | 12,720,461 | 12,720,653 | 0   | 0 | 4  | no  | TE |
| at_locus.00680 | 1 | 12,720,930 | 12,721,332 | 3   | 0 | 6  | no  | TE |
| at_locus.00681 | 1 | 12,721,646 | 12,722,098 | 5   | 1 | 5  | no  | TE |
| at_locus.00682 | 1 | 12,723,457 | 12,723,531 | 2   | 0 | 5  | no  | TE |
| at_locus.00683 | 1 | 12,724,093 | 12,724,649 | 8   | 0 | 7  | no  | TE |
| at_locus.00684 | 1 | 12,724,895 | 12,724,945 | 2   | 0 | 4  | no  | TE |
| at_locus.00685 | 1 | 12,726,401 | 12,726,521 | 1   | 0 | 4  | no  | TE |
| at_locus.00686 | 1 | 12,726,913 | 12,727,578 | 10  | 0 | 4  | no  | TE |
| at_locus.00687 | 1 | 12,727,626 | 12,728,966 | 210 | 5 | 97 | yes | TE |
| at_locus.00688 | 1 | 12,729,588 | 12,730,564 | 20  | 1 | 31 | yes | TE |
| at_locus.00689 | 1 | 12,732,432 | 12,733,201 | 11  | 1 | 19 | yes | TE |
| at_locus.00690 | 1 | 12,733,399 | 12,734,574 | 10  | 2 | 16 | yes | TE |
| at_locus.00691 | 1 | 12,741,116 | 12,742,120 | 25  | 0 | 12 | yes |    |
| at_locus.00692 | 1 | 12,742,790 | 12,742,995 | 26  | 0 | 24 | yes |    |
| at_locus.00693 | 1 | 12,768,309 | 12,768,543 | 14  | 3 | 5  | no  |    |
| at_locus.00694 | 1 | 12,771,720 | 12,771,954 | 14  | 3 | 5  | no  |    |
| at_locus.00695 | 1 | 12,775,287 | 12,775,368 | 10  | 1 | 4  | no  |    |
| at_locus.00696 | 1 | 12,778,548 | 12,778,782 | 14  | 3 | 5  | no  |    |
| at_locus.00697 | 1 | 12,781,963 | 12,782,197 | 14  | 3 | 5  | no  |    |
| at_locus.00698 | 1 | 12,785,373 | 12,785,607 | 14  | 3 | 5  | no  |    |
| at_locus.00699 | 1 | 12,788,940 | 12,789,021 | 10  | 1 | 4  | no  |    |
| at_locus.00700 | 1 | 12,792,201 | 12,792,435 | 14  | 3 | 5  | no  |    |
| at_locus.00701 | 1 | 12,795,616 | 12,795,850 | 14  | 3 | 5  | no  |    |
| at_locus.00702 | 1 | 12,798,940 | 12,799,174 | 14  | 3 | 5  | no  |    |
| at_locus.00703 | 1 | 12,802,455 | 12,802,482 | 10  | 0 | 3  | no  |    |
| at_locus.00704 | 1 | 12,805,869 | 12,805,896 | 10  | 0 | 3  | no  |    |
| at_locus.00705 | 1 | 12,809,279 | 12,809,308 | 11  | 0 | 2  | no  |    |
| at_locus.00706 | 1 | 12,813,595 | 12,813,762 | 7   | 0 | 1  | yes |    |
| at_locus.00707 | 1 | 12,814,901 | 12,814,931 | 0   | 0 | 4  | no  | TE |
| at_locus.00708 | 1 | 12,818,246 | 12,818,615 | 7   | 0 | 4  | yes | TE |
| at_locus.00709 | 1 | 12,820,120 | 12,821,241 | 15  | 1 | 15 | no  | TE |
| at_locus.00710 | 1 | 12,823,487 | 12,823,750 | 6   | 0 | 2  | no  | TE |
| at_locus.00711 | 1 | 12,824,454 | 12,825,041 | 7   | 0 | 4  | no  | TE |
| at_locus.00712 | 1 | 12,830,548 | 12,830,905 | 4   | 0 | 1  | no  | TE |
| at_locus.00713 | 1 | 12,831,132 | 12,831,486 | 8   | 0 | 7  | no  | TE |

|                |   |            |            |    |   |    |     |    |
|----------------|---|------------|------------|----|---|----|-----|----|
| at_locus.00714 | 1 | 12,833,314 | 12,833,394 | 4  | 0 | 0  | no  | TE |
| at_locus.00715 | 1 | 12,833,419 | 12,833,655 | 0  | 0 | 4  | no  | TE |
| at_locus.00716 | 1 | 12,839,262 | 12,839,560 | 4  | 0 | 1  | no  | TE |
| at_locus.00717 | 1 | 12,846,275 | 12,846,593 | 7  | 0 | 0  | yes | TE |
| at_locus.00718 | 1 | 12,851,344 | 12,851,367 | 8  | 0 | 0  | yes |    |
| at_locus.00719 | 1 | 12,854,205 | 12,854,416 | 7  | 0 | 1  | no  | TE |
| at_locus.00720 | 1 | 12,854,796 | 12,855,413 | 13 | 2 | 1  | no  | TE |
| at_locus.00721 | 1 | 12,855,755 | 12,855,994 | 15 | 0 | 0  | yes | TE |
| at_locus.00722 | 1 | 12,861,588 | 12,862,024 | 5  | 0 | 8  | yes | TE |
| at_locus.00723 | 1 | 12,865,585 | 12,866,202 | 10 | 0 | 16 | yes |    |
| at_locus.00724 | 1 | 12,874,267 | 12,874,304 | 9  | 0 | 0  | no  | TE |
| at_locus.00725 | 1 | 12,875,487 | 12,875,517 | 4  | 0 | 0  | no  | TE |
| at_locus.00726 | 1 | 12,876,282 | 12,876,906 | 60 | 0 | 0  | no  | TE |
| at_locus.00727 | 1 | 12,896,316 | 12,896,453 | 4  | 0 | 0  | yes | TE |
| at_locus.00728 | 1 | 12,899,587 | 12,900,451 | 19 | 1 | 29 | yes | TE |
| at_locus.00729 | 1 | 12,900,867 | 12,901,144 | 15 | 0 | 13 | yes |    |
| at_locus.00730 | 1 | 12,901,549 | 12,902,488 | 29 | 3 | 33 | yes |    |
| at_locus.00731 | 1 | 12,902,934 | 12,903,158 | 5  | 0 | 6  | yes |    |
| at_locus.00732 | 1 | 12,905,353 | 12,905,771 | 1  | 0 | 5  | yes |    |
| at_locus.00733 | 1 | 12,906,155 | 12,907,113 | 17 | 1 | 16 | yes | TE |
| at_locus.00734 | 1 | 12,907,693 | 12,908,022 | 5  | 0 | 2  | yes | TE |
| at_locus.00735 | 1 | 12,929,876 | 12,930,587 | 13 | 1 | 16 | yes |    |
| at_locus.00736 | 1 | 12,944,226 | 12,944,253 | 1  | 0 | 4  | no  | TE |
| at_locus.00737 | 1 | 12,952,039 | 12,952,276 | 2  | 0 | 4  | yes | TE |
| at_locus.00738 | 1 | 12,952,833 | 12,952,856 | 5  | 0 | 0  | no  | TE |
| at_locus.00739 | 1 | 12,959,793 | 12,959,856 | 7  | 0 | 0  | no  | TE |
| at_locus.00740 | 1 | 12,976,731 | 12,977,096 | 7  | 0 | 1  | yes |    |
| at_locus.00741 | 1 | 12,992,976 | 12,993,221 | 9  | 0 | 0  | yes | TE |
| at_locus.00742 | 1 | 12,993,485 | 12,993,571 | 20 | 0 | 1  | no  | TE |
| at_locus.00743 | 1 | 12,994,583 | 12,994,607 | 8  | 0 | 1  | no  |    |
| at_locus.00744 | 1 | 13,015,831 | 13,017,121 | 46 | 2 | 1  | no  | TE |
| at_locus.00745 | 1 | 13,022,176 | 13,022,606 | 1  | 0 | 4  | yes |    |
| at_locus.00746 | 1 | 13,028,054 | 13,028,391 | 0  | 0 | 4  | yes |    |
| at_locus.00747 | 1 | 13,039,449 | 13,039,473 | 6  | 0 | 0  | yes | TE |
| at_locus.00748 | 1 | 13,042,713 | 13,043,077 | 4  | 0 | 1  | yes |    |
| at_locus.00749 | 1 | 13,043,332 | 13,043,384 | 11 | 0 | 0  | yes |    |
| at_locus.00750 | 1 | 13,050,010 | 13,050,079 | 5  | 0 | 0  | yes | TE |

|                |   |            |            |    |   |    |     |    |
|----------------|---|------------|------------|----|---|----|-----|----|
| at_locus.00751 | 1 | 13,055,685 | 13,056,359 | 8  | 0 | 13 | yes | TE |
| at_locus.00752 | 1 | 13,057,189 | 13,057,440 | 5  | 0 | 1  | yes | TE |
| at_locus.00753 | 1 | 13,057,645 | 13,057,764 | 5  | 0 | 1  | no  | TE |
| at_locus.00754 | 1 | 13,058,847 | 13,058,886 | 7  | 0 | 0  | no  | TE |
| at_locus.00755 | 1 | 13,059,493 | 13,059,805 | 10 | 0 | 0  | no  | TE |
| at_locus.00756 | 1 | 13,060,081 | 13,060,754 | 44 | 3 | 0  | no  | TE |
| at_locus.00757 | 1 | 13,065,137 | 13,065,188 | 6  | 0 | 0  | yes | TE |
| at_locus.00758 | 1 | 13,066,608 | 13,066,670 | 4  | 0 | 0  | yes |    |
| at_locus.00759 | 1 | 13,067,291 | 13,067,312 | 1  | 5 | 1  | yes |    |
| at_locus.00760 | 1 | 13,075,791 | 13,075,851 | 5  | 0 | 0  | yes |    |
| at_locus.00761 | 1 | 13,085,199 | 13,085,894 | 9  | 2 | 11 | yes |    |
| at_locus.00762 | 1 | 13,086,265 | 13,086,610 | 3  | 0 | 4  | yes |    |
| at_locus.00763 | 1 | 13,087,361 | 13,087,538 | 48 | 0 | 3  | yes | TE |
| at_locus.00764 | 1 | 13,088,190 | 13,088,359 | 15 | 0 | 0  | no  | TE |
| at_locus.00765 | 1 | 13,107,789 | 13,107,970 | 4  | 0 | 1  | yes |    |
| at_locus.00766 | 1 | 13,108,569 | 13,108,852 | 4  | 0 | 10 | no  |    |
| at_locus.00767 | 1 | 13,109,468 | 13,109,601 | 0  | 0 | 4  | yes |    |
| at_locus.00768 | 1 | 13,131,600 | 13,132,119 | 2  | 0 | 4  | no  | TE |
| at_locus.00769 | 1 | 13,132,782 | 13,133,329 | 7  | 0 | 3  | no  | TE |
| at_locus.00770 | 1 | 13,134,116 | 13,134,212 | 0  | 0 | 5  | no  | TE |
| at_locus.00771 | 1 | 13,134,586 | 13,134,847 | 4  | 0 | 2  | no  | TE |
| at_locus.00772 | 1 | 13,135,137 | 13,135,348 | 4  | 0 | 1  | no  | TE |
| at_locus.00773 | 1 | 13,136,511 | 13,137,251 | 5  | 0 | 6  | no  | TE |
| at_locus.00774 | 1 | 13,137,475 | 13,137,913 | 0  | 0 | 4  | no  | TE |
| at_locus.00775 | 1 | 13,138,148 | 13,138,977 | 10 | 0 | 9  | yes | TE |
| at_locus.00776 | 1 | 13,148,292 | 13,148,383 | 5  | 0 | 0  | yes |    |
| at_locus.00777 | 1 | 13,166,245 | 13,167,257 | 78 | 1 | 2  | no  | TE |
| at_locus.00778 | 1 | 13,171,114 | 13,171,335 | 7  | 0 | 3  | yes |    |
| at_locus.00779 | 1 | 13,172,957 | 13,173,207 | 7  | 0 | 1  | yes | TE |
| at_locus.00780 | 1 | 13,173,472 | 13,173,776 | 2  | 0 | 4  | no  | TE |
| at_locus.00781 | 1 | 13,174,745 | 13,175,226 | 7  | 0 | 4  | yes | TE |
| at_locus.00782 | 1 | 13,176,973 | 13,177,682 | 1  | 0 | 9  | no  | TE |
| at_locus.00783 | 1 | 13,178,075 | 13,178,686 | 1  | 1 | 5  | no  | TE |
| at_locus.00784 | 1 | 13,181,217 | 13,181,443 | 4  | 0 | 0  | no  | TE |
| at_locus.00785 | 1 | 13,199,460 | 13,199,768 | 4  | 0 | 4  | yes | TE |
| at_locus.00786 | 1 | 13,202,699 | 13,202,887 | 6  | 0 | 8  | yes |    |
| at_locus.00787 | 1 | 13,216,473 | 13,217,044 | 19 | 0 | 4  | yes | TE |

|                |   |            |            |    |   |    |     |    |
|----------------|---|------------|------------|----|---|----|-----|----|
| at_locus.00788 | 1 | 13,221,210 | 13,221,250 | 4  | 0 | 1  | yes |    |
| at_locus.00789 | 1 | 13,231,933 | 13,232,136 | 24 | 0 | 5  | yes |    |
| at_locus.00790 | 1 | 13,233,246 | 13,234,025 | 2  | 0 | 10 | no  | TE |
| at_locus.00791 | 1 | 13,236,738 | 13,236,828 | 1  | 0 | 4  | yes | TE |
| at_locus.00792 | 1 | 13,237,325 | 13,237,746 | 34 | 1 | 4  | yes |    |
| at_locus.00793 | 1 | 13,238,732 | 13,238,958 | 0  | 0 | 4  | yes |    |
| at_locus.00794 | 1 | 13,240,075 | 13,240,422 | 4  | 0 | 11 | yes |    |
| at_locus.00795 | 1 | 13,241,299 | 13,241,704 | 0  | 0 | 5  | yes | TE |
| at_locus.00796 | 1 | 13,242,744 | 13,242,776 | 4  | 0 | 0  | no  | TE |
| at_locus.00797 | 1 | 13,243,495 | 13,244,424 | 19 | 0 | 8  | yes |    |
| at_locus.00798 | 1 | 13,245,152 | 13,245,513 | 14 | 0 | 14 | yes |    |
| at_locus.00799 | 1 | 13,248,755 | 13,248,827 | 5  | 0 | 1  | yes |    |
| at_locus.00800 | 1 | 13,249,299 | 13,249,717 | 4  | 0 | 5  | no  | TE |
| at_locus.00801 | 1 | 13,251,887 | 13,251,980 | 4  | 0 | 3  | yes |    |
| at_locus.00802 | 1 | 13,258,142 | 13,258,460 | 15 | 0 | 1  | yes | TE |
| at_locus.00803 | 1 | 13,260,492 | 13,260,915 | 5  | 0 | 0  | yes |    |
| at_locus.00804 | 1 | 13,261,902 | 13,261,927 | 0  | 0 | 4  | yes |    |
| at_locus.00805 | 1 | 13,263,339 | 13,263,368 | 4  | 0 | 0  | no  | TE |
| at_locus.00806 | 1 | 13,295,003 | 13,295,289 | 2  | 0 | 5  | no  | TE |
| at_locus.00807 | 1 | 13,295,659 | 13,295,990 | 7  | 0 | 6  | no  | TE |
| at_locus.00808 | 1 | 13,299,823 | 13,300,251 | 4  | 0 | 0  | yes | TE |
| at_locus.00809 | 1 | 13,300,988 | 13,301,042 | 8  | 0 | 0  | yes | TE |
| at_locus.00810 | 1 | 13,301,054 | 13,301,530 | 0  | 0 | 6  | yes | TE |
| at_locus.00811 | 1 | 13,302,427 | 13,302,684 | 4  | 0 | 4  | yes | TE |
| at_locus.00812 | 1 | 13,309,327 | 13,309,831 | 8  | 0 | 4  | yes |    |
| at_locus.00813 | 1 | 13,314,827 | 13,314,876 | 13 | 0 | 0  | no  | TE |
| at_locus.00814 | 1 | 13,342,522 | 13,342,545 | 6  | 0 | 1  | no  |    |
| at_locus.00815 | 1 | 13,400,187 | 13,400,399 | 7  | 0 | 2  | no  | TE |
| at_locus.00816 | 1 | 13,402,304 | 13,402,571 | 5  | 0 | 7  | no  | TE |
| at_locus.00817 | 1 | 13,426,254 | 13,426,311 | 6  | 0 | 0  | no  |    |
| at_locus.00818 | 1 | 13,432,236 | 13,432,277 | 5  | 0 | 0  | no  |    |
| at_locus.00819 | 1 | 13,437,845 | 13,438,315 | 9  | 0 | 9  | yes |    |
| at_locus.00820 | 1 | 13,450,411 | 13,450,540 | 4  | 0 | 0  | yes |    |
| at_locus.00821 | 1 | 13,483,972 | 13,484,230 | 6  | 0 | 2  | no  | TE |
| at_locus.00822 | 1 | 13,485,067 | 13,485,577 | 3  | 1 | 8  | no  | TE |
| at_locus.00823 | 1 | 13,486,224 | 13,486,460 | 6  | 0 | 1  | no  | TE |
| at_locus.00824 | 1 | 13,487,482 | 13,487,748 | 2  | 0 | 7  | no  | TE |

|                |   |            |            |     |   |     |     |    |
|----------------|---|------------|------------|-----|---|-----|-----|----|
| at_locus.00825 | 1 | 13,488,148 | 13,488,881 | 5   | 0 | 5   | no  | TE |
| at_locus.00826 | 1 | 13,489,349 | 13,489,819 | 1   | 0 | 5   | no  | TE |
| at_locus.00827 | 1 | 13,490,237 | 13,490,685 | 3   | 0 | 5   | no  | TE |
| at_locus.00828 | 1 | 13,491,322 | 13,491,800 | 15  | 0 | 5   | yes | TE |
| at_locus.00829 | 1 | 13,497,128 | 13,497,201 | 5   | 0 | 0   | no  | TE |
| at_locus.00830 | 1 | 13,498,805 | 13,498,844 | 5   | 0 | 0   | yes | TE |
| at_locus.00831 | 1 | 13,508,471 | 13,509,753 | 21  | 1 | 7   | no  | TE |
| at_locus.00832 | 1 | 13,510,038 | 13,510,158 | 4   | 0 | 0   | no  | TE |
| at_locus.00833 | 1 | 13,510,877 | 13,511,533 | 8   | 0 | 11  | yes | TE |
| at_locus.00834 | 1 | 13,511,641 | 13,512,119 | 3   | 0 | 7   | no  | TE |
| at_locus.00835 | 1 | 13,512,564 | 13,513,500 | 4   | 0 | 9   | yes | TE |
| at_locus.00836 | 1 | 13,513,742 | 13,513,818 | 1   | 0 | 6   | yes | TE |
| at_locus.00837 | 1 | 13,514,611 | 13,515,412 | 15  | 1 | 31  | yes | TE |
| at_locus.00838 | 1 | 13,515,823 | 13,515,855 | 0   | 0 | 6   | no  | TE |
| at_locus.00839 | 1 | 13,516,153 | 13,517,377 | 23  | 0 | 13  | yes | TE |
| at_locus.00840 | 1 | 13,517,669 | 13,517,702 | 4   | 0 | 0   | no  | TE |
| at_locus.00841 | 1 | 13,517,996 | 13,518,135 | 5   | 0 | 3   | no  | TE |
| at_locus.00842 | 1 | 13,521,002 | 13,521,765 | 9   | 0 | 9   | yes | TE |
| at_locus.00843 | 1 | 13,524,015 | 13,524,581 | 12  | 1 | 11  | yes | TE |
| at_locus.00844 | 1 | 13,525,583 | 13,525,899 | 11  | 0 | 22  | yes |    |
| at_locus.00845 | 1 | 13,526,767 | 13,527,010 | 3   | 0 | 4   | yes | TE |
| at_locus.00846 | 1 | 13,545,885 | 13,546,014 | 5   | 0 | 0   | yes | TE |
| at_locus.00847 | 1 | 13,568,247 | 13,568,674 | 19  | 0 | 3   | yes | TE |
| at_locus.00848 | 1 | 13,568,748 | 13,571,454 | 200 | 3 | 183 | yes | TE |
| at_locus.00849 | 1 | 13,573,579 | 13,574,193 | 14  | 0 | 3   | yes | TE |
| at_locus.00850 | 1 | 13,582,010 | 13,582,044 | 2   | 0 | 5   | no  | TE |
| at_locus.00851 | 1 | 13,593,015 | 13,593,122 | 4   | 0 | 0   | yes | TE |
| at_locus.00852 | 1 | 13,594,958 | 13,595,303 | 6   | 0 | 1   | no  | TE |
| at_locus.00853 | 1 | 13,623,180 | 13,623,352 | 5   | 0 | 2   | no  | TE |
| at_locus.00854 | 1 | 13,625,221 | 13,625,309 | 4   | 0 | 1   | no  | TE |
| at_locus.00855 | 1 | 13,640,230 | 13,640,782 | 24  | 1 | 1   | yes |    |
| at_locus.00856 | 1 | 13,641,000 | 13,641,093 | 6   | 0 | 1   | no  |    |
| at_locus.00857 | 1 | 13,641,310 | 13,641,416 | 6   | 0 | 0   | no  | TE |
| at_locus.00858 | 1 | 13,645,804 | 13,646,659 | 17  | 3 | 12  | yes | TE |
| at_locus.00859 | 1 | 13,649,430 | 13,649,652 | 6   | 0 | 7   | yes | TE |
| at_locus.00860 | 1 | 13,651,316 | 13,651,768 | 1   | 0 | 4   | yes | TE |
| at_locus.00861 | 1 | 13,651,833 | 13,651,922 | 4   | 0 | 0   | yes | TE |

|                |   |            |            |     |   |     |     |    |
|----------------|---|------------|------------|-----|---|-----|-----|----|
| at_locus.00862 | 1 | 13,652,300 | 13,653,283 | 11  | 0 | 24  | yes | TE |
| at_locus.00863 | 1 | 13,653,687 | 13,654,801 | 13  | 0 | 23  | no  | TE |
| at_locus.00864 | 1 | 13,660,546 | 13,666,835 | 155 | 4 | 185 | yes | TE |
| at_locus.00865 | 1 | 13,667,121 | 13,667,327 | 4   | 0 | 1   | no  | TE |
| at_locus.00866 | 1 | 13,667,528 | 13,668,695 | 40  | 2 | 14  | yes | TE |
| at_locus.00867 | 1 | 13,676,788 | 13,676,815 | 8   | 0 | 0   | yes |    |
| at_locus.00868 | 1 | 13,688,050 | 13,688,073 | 5   | 0 | 0   | yes |    |
| at_locus.00869 | 1 | 13,705,384 | 13,705,506 | 5   | 0 | 0   | no  | TE |
| at_locus.00870 | 1 | 13,705,860 | 13,706,249 | 2   | 1 | 4   | no  | TE |
| at_locus.00871 | 1 | 13,707,358 | 13,707,495 | 6   | 0 | 3   | no  | TE |
| at_locus.00872 | 1 | 13,712,295 | 13,713,687 | 27  | 1 | 33  | no  | TE |
| at_locus.00873 | 1 | 13,715,813 | 13,715,987 | 0   | 0 | 4   | yes | TE |
| at_locus.00874 | 1 | 13,737,517 | 13,737,811 | 5   | 0 | 4   | no  | TE |
| at_locus.00875 | 1 | 13,742,045 | 13,742,666 | 7   | 0 | 4   | no  | TE |
| at_locus.00876 | 1 | 13,770,478 | 13,770,792 | 4   | 0 | 6   | yes | TE |
| at_locus.00877 | 1 | 13,770,990 | 13,771,210 | 4   | 1 | 5   | no  | TE |
| at_locus.00878 | 1 | 13,771,601 | 13,772,026 | 10  | 0 | 6   | no  | TE |
| at_locus.00879 | 1 | 13,772,609 | 13,772,840 | 6   | 0 | 5   | no  | TE |
| at_locus.00880 | 1 | 13,773,287 | 13,773,549 | 4   | 0 | 0   | yes | TE |
| at_locus.00881 | 1 | 13,774,218 | 13,776,154 | 54  | 3 | 53  | no  | TE |
| at_locus.00882 | 1 | 13,776,366 | 13,776,721 | 11  | 0 | 12  | no  | TE |
| at_locus.00883 | 1 | 13,777,150 | 13,777,253 | 5   | 0 | 0   | no  | TE |
| at_locus.00884 | 1 | 13,777,260 | 13,777,521 | 0   | 1 | 4   | no  | TE |
| at_locus.00885 | 1 | 13,777,803 | 13,778,783 | 10  | 0 | 13  | no  | TE |
| at_locus.00886 | 1 | 13,782,192 | 13,782,347 | 0   | 0 | 4   | no  | TE |
| at_locus.00887 | 1 | 13,782,836 | 13,783,188 | 5   | 0 | 3   | no  | TE |
| at_locus.00888 | 1 | 13,785,250 | 13,786,140 | 9   | 0 | 7   | no  | TE |
| at_locus.00889 | 1 | 13,786,381 | 13,786,616 | 5   | 0 | 1   | no  | TE |
| at_locus.00890 | 1 | 13,787,814 | 13,788,523 | 18  | 0 | 12  | yes | TE |
| at_locus.00891 | 1 | 13,788,768 | 13,790,531 | 38  | 0 | 48  | yes | TE |
| at_locus.00892 | 1 | 13,791,613 | 13,791,748 | 1   | 0 | 4   | no  | TE |
| at_locus.00893 | 1 | 13,792,362 | 13,792,641 | 2   | 0 | 4   | no  | TE |
| at_locus.00894 | 1 | 13,793,159 | 13,793,749 | 8   | 0 | 12  | yes | TE |
| at_locus.00895 | 1 | 13,794,127 | 13,794,559 | 7   | 0 | 11  | yes | TE |
| at_locus.00896 | 1 | 13,794,769 | 13,795,226 | 14  | 0 | 14  | no  | TE |
| at_locus.00897 | 1 | 13,795,471 | 13,796,382 | 30  | 0 | 32  | no  | TE |
| at_locus.00898 | 1 | 13,797,709 | 13,798,425 | 17  | 3 | 12  | no  | TE |



|                |   |            |            |     |   |     |     |    |
|----------------|---|------------|------------|-----|---|-----|-----|----|
| at_locus.00899 | 1 | 13,798,554 | 13,799,031 | 13  | 0 | 14  | no  | TE |
| at_locus.00900 | 1 | 13,799,270 | 13,799,920 | 14  | 1 | 12  | no  | TE |
| at_locus.00901 | 1 | 13,800,147 | 13,800,716 | 9   | 0 | 14  | no  | TE |
| at_locus.00902 | 1 | 13,800,929 | 13,801,666 | 9   | 0 | 13  | no  | TE |
| at_locus.00903 | 1 | 13,802,624 | 13,803,033 | 9   | 0 | 5   | no  | TE |
| at_locus.00904 | 1 | 13,812,117 | 13,812,329 | 20  | 0 | 0   | no  | TE |
| at_locus.00905 | 1 | 13,825,421 | 13,825,570 | 0   | 0 | 4   | yes |    |
| at_locus.00906 | 1 | 13,829,708 | 13,830,296 | 7   | 0 | 19  | no  | TE |
| at_locus.00907 | 1 | 13,830,446 | 13,830,944 | 10  | 0 | 12  | no  | TE |
| at_locus.00908 | 1 | 13,831,122 | 13,831,548 | 1   | 0 | 9   | no  | TE |
| at_locus.00909 | 1 | 13,831,750 | 13,832,757 | 21  | 0 | 24  | yes | TE |
| at_locus.00910 | 1 | 13,839,097 | 13,839,186 | 5   | 0 | 0   | yes |    |
| at_locus.00911 | 1 | 13,852,417 | 13,852,846 | 4   | 0 | 11  | no  | TE |
| at_locus.00912 | 1 | 13,855,663 | 13,856,101 | 8   | 0 | 0   | yes | TE |
| at_locus.00913 | 1 | 13,864,211 | 13,865,110 | 34  | 0 | 30  | no  | TE |
| at_locus.00914 | 1 | 13,865,383 | 13,865,879 | 16  | 0 | 7   | no  | TE |
| at_locus.00915 | 1 | 13,870,460 | 13,870,703 | 4   | 0 | 4   | yes |    |
| at_locus.00916 | 1 | 13,871,099 | 13,871,583 | 20  | 0 | 1   | no  | TE |
| at_locus.00917 | 1 | 13,880,269 | 13,880,587 | 5   | 0 | 0   | no  | TE |
| at_locus.00918 | 1 | 13,882,216 | 13,882,841 | 4   | 0 | 5   | yes |    |
| at_locus.00919 | 1 | 13,884,346 | 13,888,837 | 109 | 3 | 119 | yes | TE |
| at_locus.00920 | 1 | 13,889,055 | 13,890,306 | 26  | 0 | 49  | no  | TE |
| at_locus.00921 | 1 | 13,890,527 | 13,890,733 | 4   | 0 | 2   | no  | TE |
| at_locus.00922 | 1 | 13,891,080 | 13,891,305 | 5   | 0 | 1   | no  | TE |
| at_locus.00923 | 1 | 13,891,530 | 13,892,047 | 41  | 2 | 13  | no  | TE |
| at_locus.00924 | 1 | 13,895,568 | 13,896,151 | 12  | 1 | 10  | yes |    |
| at_locus.00925 | 1 | 13,903,950 | 13,904,099 | 1   | 1 | 9   | no  |    |
| at_locus.00926 | 1 | 13,906,402 | 13,907,689 | 16  | 0 | 9   | no  | TE |
| at_locus.00927 | 1 | 13,908,044 | 13,908,283 | 7   | 1 | 5   | yes | TE |
| at_locus.00928 | 1 | 13,908,686 | 13,909,513 | 22  | 0 | 16  | yes | TE |
| at_locus.00929 | 1 | 13,910,577 | 13,910,945 | 1   | 0 | 7   | yes | TE |
| at_locus.00930 | 1 | 13,912,191 | 13,912,824 | 24  | 1 | 18  | yes |    |
| at_locus.00931 | 1 | 13,913,770 | 13,913,966 | 5   | 0 | 5   | yes |    |
| at_locus.00932 | 1 | 13,918,722 | 13,919,533 | 6   | 0 | 19  | yes | TE |
| at_locus.00933 | 1 | 13,921,972 | 13,923,284 | 17  | 1 | 14  | yes | TE |
| at_locus.00934 | 1 | 13,926,865 | 13,928,547 | 143 | 1 | 125 | yes | TE |
| at_locus.00935 | 1 | 13,932,936 | 13,934,608 | 217 | 5 | 198 | yes | TE |

|                |   |            |            |     |   |     |     |    |
|----------------|---|------------|------------|-----|---|-----|-----|----|
| at_locus.00936 | 1 | 13,938,994 | 13,939,736 | 163 | 5 | 164 | no  | TE |
| at_locus.00937 | 1 | 13,941,877 | 13,941,911 | 2   | 0 | 5   | no  | TE |
| at_locus.00938 | 1 | 13,942,156 | 13,942,424 | 7   | 0 | 5   | no  | TE |
| at_locus.00939 | 1 | 13,942,633 | 13,942,824 | 14  | 0 | 15  | no  | TE |
| at_locus.00940 | 1 | 13,943,051 | 13,943,753 | 10  | 0 | 13  | no  | TE |
| at_locus.00941 | 1 | 13,943,993 | 13,944,132 | 9   | 0 | 3   | no  | TE |
| at_locus.00942 | 1 | 13,946,376 | 13,947,676 | 21  | 0 | 12  | no  | TE |
| at_locus.00943 | 1 | 13,947,945 | 13,948,094 | 4   | 0 | 7   | no  | TE |
| at_locus.00944 | 1 | 13,961,128 | 13,961,775 | 1   | 0 | 6   | yes | TE |
| at_locus.00945 | 1 | 13,973,253 | 13,974,352 | 26  | 1 | 16  | no  | TE |
| at_locus.00946 | 1 | 13,974,513 | 13,974,810 | 4   | 0 | 1   | no  | TE |
| at_locus.00947 | 1 | 13,979,850 | 13,981,087 | 27  | 1 | 36  | yes | TE |
| at_locus.00948 | 1 | 13,982,991 | 13,983,020 | 4   | 0 | 0   | no  | TE |
| at_locus.00949 | 1 | 14,007,844 | 14,008,124 | 7   | 0 | 0   | yes |    |
| at_locus.00950 | 1 | 14,012,183 | 14,012,279 | 4   | 0 | 0   | no  | TE |
| at_locus.00951 | 1 | 14,014,428 | 14,014,633 | 5   | 0 | 0   | no  | TE |
| at_locus.00952 | 1 | 14,015,255 | 14,015,279 | 4   | 0 | 0   | no  | TE |
| at_locus.00953 | 1 | 14,015,564 | 14,015,804 | 21  | 0 | 0   | no  | TE |
| at_locus.00954 | 1 | 14,021,879 | 14,022,010 | 4   | 0 | 0   | yes |    |
| at_locus.00955 | 1 | 14,026,834 | 14,026,972 | 5   | 0 | 0   | yes |    |
| at_locus.00956 | 1 | 14,033,273 | 14,033,451 | 9   | 0 | 2   | no  |    |
| at_locus.00957 | 1 | 14,035,108 | 14,035,683 | 9   | 0 | 21  | yes |    |
| at_locus.00958 | 1 | 14,047,371 | 14,048,334 | 22  | 0 | 15  | no  | TE |
| at_locus.00959 | 1 | 14,061,765 | 14,063,009 | 21  | 3 | 32  | no  | TE |
| at_locus.00960 | 1 | 14,075,091 | 14,075,123 | 4   | 0 | 0   | no  | TE |
| at_locus.00961 | 1 | 14,085,029 | 14,086,749 | 43  | 0 | 45  | yes | TE |
| at_locus.00962 | 1 | 14,087,025 | 14,087,559 | 6   | 0 | 11  | no  | TE |
| at_locus.00963 | 1 | 14,088,782 | 14,089,047 | 1   | 0 | 11  | no  | TE |
| at_locus.00964 | 1 | 14,092,892 | 14,093,932 | 16  | 0 | 26  | no  | TE |
| at_locus.00965 | 1 | 14,094,256 | 14,095,294 | 24  | 0 | 20  | no  | TE |
| at_locus.00966 | 1 | 14,095,569 | 14,096,468 | 22  | 0 | 31  | no  | TE |
| at_locus.00967 | 1 | 14,101,925 | 14,102,618 | 3   | 0 | 11  | yes | TE |
| at_locus.00968 | 1 | 14,106,014 | 14,106,061 | 0   | 0 | 4   | no  | TE |
| at_locus.00969 | 1 | 14,108,864 | 14,109,236 | 5   | 0 | 5   | no  | TE |
| at_locus.00970 | 1 | 14,109,537 | 14,109,910 | 0   | 0 | 4   | no  | TE |
| at_locus.00971 | 1 | 14,124,089 | 14,124,701 | 3   | 0 | 7   | no  | TE |
| at_locus.00972 | 1 | 14,127,854 | 14,127,908 | 4   | 0 | 0   | yes | TE |

|                |   |            |            |    |    |    |     |    |
|----------------|---|------------|------------|----|----|----|-----|----|
| at_locus.00973 | 1 | 14,129,776 | 14,129,908 | 1  | 0  | 5  | no  | TE |
| at_locus.00974 | 1 | 14,130,453 | 14,130,772 | 0  | 0  | 4  | no  | TE |
| at_locus.00975 | 1 | 14,157,177 | 14,157,452 | 4  | 0  | 0  | yes |    |
| at_locus.00976 | 1 | 14,166,697 | 14,167,089 | 3  | 1  | 0  | no  |    |
| at_locus.00977 | 1 | 14,171,942 | 14,172,024 | 8  | 0  | 0  | yes | TE |
| at_locus.00978 | 1 | 14,180,508 | 14,182,648 | 46 | 5  | 46 | yes | TE |
| at_locus.00979 | 1 | 14,182,861 | 14,184,242 | 9  | 0  | 18 | no  | TE |
| at_locus.00980 | 1 | 14,184,301 | 14,185,082 | 15 | 0  | 14 | yes | TE |
| at_locus.00981 | 1 | 14,185,432 | 14,185,676 | 2  | 0  | 9  | no  | TE |
| at_locus.00982 | 1 | 14,186,260 | 14,186,616 | 0  | 0  | 4  | yes | TE |
| at_locus.00983 | 1 | 14,191,679 | 14,192,046 | 2  | 0  | 8  | no  | TE |
| at_locus.00984 | 1 | 14,192,258 | 14,192,596 | 1  | 0  | 5  | no  | TE |
| at_locus.00985 | 1 | 14,193,162 | 14,194,246 | 3  | 0  | 25 | yes | TE |
| at_locus.00986 | 1 | 14,194,455 | 14,195,363 | 7  | 0  | 33 | yes | TE |
| at_locus.00987 | 1 | 14,198,731 | 14,198,895 | 3  | 23 | 9  | no  |    |
| at_locus.00988 | 1 | 14,208,867 | 14,209,670 | 2  | 2  | 8  | yes | TE |
| at_locus.00989 | 1 | 14,217,386 | 14,218,857 | 16 | 0  | 23 | no  | TE |
| at_locus.00990 | 1 | 14,219,041 | 14,219,608 | 1  | 0  | 5  | no  | TE |
| at_locus.00991 | 1 | 14,222,026 | 14,222,619 | 11 | 1  | 9  | yes | TE |
| at_locus.00992 | 1 | 14,223,651 | 14,223,934 | 1  | 0  | 6  | no  | TE |
| at_locus.00993 | 1 | 14,227,010 | 14,227,241 | 5  | 0  | 1  | no  | TE |
| at_locus.00994 | 1 | 14,227,371 | 14,228,091 | 16 | 0  | 14 | yes | TE |
| at_locus.00995 | 1 | 14,229,094 | 14,229,581 | 10 | 0  | 10 | yes | TE |
| at_locus.00996 | 1 | 14,229,767 | 14,230,664 | 17 | 4  | 16 | no  | TE |
| at_locus.00997 | 1 | 14,230,920 | 14,231,643 | 8  | 0  | 9  | no  | TE |
| at_locus.00998 | 1 | 14,232,762 | 14,233,388 | 9  | 0  | 2  | no  | TE |
| at_locus.00999 | 1 | 14,235,244 | 14,235,500 | 4  | 0  | 2  | no  | TE |
| at_locus.01000 | 1 | 14,236,063 | 14,236,764 | 18 | 0  | 9  | no  | TE |
| at_locus.01001 | 1 | 14,239,550 | 14,239,766 | 4  | 0  | 2  | no  | TE |
| at_locus.01002 | 1 | 14,241,109 | 14,241,530 | 0  | 0  | 5  | no  | TE |
| at_locus.01003 | 1 | 14,241,949 | 14,242,459 | 2  | 0  | 7  | no  | TE |
| at_locus.01004 | 1 | 14,242,703 | 14,243,404 | 20 | 0  | 9  | no  | TE |
| at_locus.01005 | 1 | 14,245,030 | 14,245,277 | 2  | 0  | 4  | no  | TE |
| at_locus.01006 | 1 | 14,246,077 | 14,246,508 | 5  | 0  | 11 | no  | TE |
| at_locus.01007 | 1 | 14,247,185 | 14,247,504 | 1  | 0  | 5  | yes | TE |
| at_locus.01008 | 1 | 14,247,720 | 14,248,099 | 7  | 0  | 5  | no  | TE |
| at_locus.01009 | 1 | 14,248,542 | 14,249,033 | 2  | 0  | 6  | no  | TE |

|                |   |            |            |    |   |    |     |    |
|----------------|---|------------|------------|----|---|----|-----|----|
| at_locus.01010 | 1 | 14,249,476 | 14,249,501 | 1  | 0 | 5  | no  | TE |
| at_locus.01011 | 1 | 14,249,711 | 14,250,355 | 4  | 1 | 14 | no  | TE |
| at_locus.01012 | 1 | 14,250,553 | 14,250,810 | 10 | 3 | 6  | yes | TE |
| at_locus.01013 | 1 | 14,251,943 | 14,252,321 | 5  | 0 | 6  | no  | TE |
| at_locus.01014 | 1 | 14,252,483 | 14,252,541 | 0  | 0 | 6  | no  | TE |
| at_locus.01015 | 1 | 14,252,754 | 14,253,060 | 4  | 0 | 0  | yes | TE |
| at_locus.01016 | 1 | 14,253,562 | 14,254,111 | 5  | 0 | 9  | yes | TE |
| at_locus.01017 | 1 | 14,255,258 | 14,257,163 | 44 | 4 | 40 | yes | TE |
| at_locus.01018 | 1 | 14,257,403 | 14,257,758 | 6  | 0 | 7  | no  | TE |
| at_locus.01019 | 1 | 14,258,180 | 14,258,356 | 8  | 0 | 5  | no  | TE |
| at_locus.01020 | 1 | 14,258,774 | 14,259,188 | 5  | 0 | 6  | no  | TE |
| at_locus.01021 | 1 | 14,259,406 | 14,259,602 | 0  | 0 | 5  | no  | TE |
| at_locus.01022 | 1 | 14,259,604 | 14,259,893 | 5  | 0 | 1  | no  | TE |
| at_locus.01023 | 1 | 14,262,312 | 14,264,594 | 24 | 4 | 26 | no  | TE |
| at_locus.01024 | 1 | 14,266,704 | 14,267,303 | 8  | 0 | 16 | no  | TE |
| at_locus.01025 | 1 | 14,269,370 | 14,269,901 | 6  | 0 | 2  | yes | TE |
| at_locus.01026 | 1 | 14,270,467 | 14,270,735 | 6  | 0 | 1  | no  | TE |
| at_locus.01027 | 1 | 14,272,001 | 14,272,249 | 2  | 0 | 5  | yes | TE |
| at_locus.01028 | 1 | 14,273,447 | 14,273,856 | 2  | 0 | 5  | no  | TE |
| at_locus.01029 | 1 | 14,275,986 | 14,276,288 | 2  | 0 | 4  | no  | TE |
| at_locus.01030 | 1 | 14,283,216 | 14,283,841 | 11 | 0 | 11 | no  | TE |
| at_locus.01031 | 1 | 14,284,875 | 14,285,067 | 17 | 0 | 4  | no  | TE |
| at_locus.01032 | 1 | 14,289,111 | 14,289,516 | 4  | 0 | 6  | yes |    |
| at_locus.01033 | 1 | 14,299,487 | 14,299,895 | 6  | 0 | 1  | no  | TE |
| at_locus.01034 | 1 | 14,300,100 | 14,300,150 | 4  | 0 | 0  | no  | TE |
| at_locus.01035 | 1 | 14,300,999 | 14,301,408 | 14 | 0 | 0  | yes | TE |
| at_locus.01036 | 1 | 14,302,199 | 14,302,283 | 16 | 0 | 0  | no  | TE |
| at_locus.01037 | 1 | 14,311,207 | 14,311,453 | 6  | 1 | 1  | no  | TE |
| at_locus.01038 | 1 | 14,311,898 | 14,311,958 | 1  | 0 | 4  | no  | TE |
| at_locus.01039 | 1 | 14,313,045 | 14,313,321 | 5  | 0 | 0  | yes | TE |
| at_locus.01040 | 1 | 14,317,636 | 14,317,814 | 4  | 0 | 1  | no  | TE |
| at_locus.01041 | 1 | 14,318,105 | 14,320,493 | 22 | 1 | 39 | no  | TE |
| at_locus.01042 | 1 | 14,320,912 | 14,321,198 | 6  | 0 | 8  | no  | TE |
| at_locus.01043 | 1 | 14,321,782 | 14,322,224 | 8  | 0 | 8  | no  | TE |
| at_locus.01044 | 1 | 14,322,302 | 14,323,270 | 20 | 2 | 12 | no  | TE |
| at_locus.01045 | 1 | 14,326,142 | 14,326,271 | 4  | 0 | 2  | no  | TE |
| at_locus.01046 | 1 | 14,326,652 | 14,326,827 | 4  | 0 | 1  | no  | TE |

|                |   |            |            |    |   |    |     |    |
|----------------|---|------------|------------|----|---|----|-----|----|
| at_locus.01047 | 1 | 14,329,519 | 14,329,730 | 4  | 0 | 2  | no  | TE |
| at_locus.01048 | 1 | 14,331,837 | 14,331,994 | 4  | 0 | 1  | no  | TE |
| at_locus.01049 | 1 | 14,334,077 | 14,334,154 | 0  | 0 | 5  | no  | TE |
| at_locus.01050 | 1 | 14,336,820 | 14,337,491 | 10 | 0 | 5  | no  | TE |
| at_locus.01051 | 1 | 14,338,561 | 14,338,586 | 6  | 0 | 0  | no  | TE |
| at_locus.01052 | 1 | 14,338,749 | 14,340,594 | 43 | 3 | 52 | yes | TE |
| at_locus.01053 | 1 | 14,340,809 | 14,341,401 | 9  | 0 | 9  | no  | TE |
| at_locus.01054 | 1 | 14,341,639 | 14,343,705 | 28 | 2 | 51 | no  | TE |
| at_locus.01055 | 1 | 14,344,272 | 14,344,697 | 7  | 0 | 10 | no  | TE |
| at_locus.01056 | 1 | 14,346,566 | 14,346,656 | 0  | 0 | 4  | no  | TE |
| at_locus.01057 | 1 | 14,346,706 | 14,346,896 | 4  | 0 | 0  | no  | TE |
| at_locus.01058 | 1 | 14,347,507 | 14,348,727 | 18 | 0 | 5  | no  | TE |
| at_locus.01059 | 1 | 14,350,306 | 14,350,874 | 1  | 0 | 4  | no  | TE |
| at_locus.01060 | 1 | 14,351,192 | 14,351,427 | 0  | 0 | 4  | no  | TE |
| at_locus.01061 | 1 | 14,359,261 | 14,359,392 | 4  | 0 | 6  | no  | TE |
| at_locus.01062 | 1 | 14,361,890 | 14,361,960 | 4  | 0 | 0  | no  | TE |
| at_locus.01063 | 1 | 14,364,213 | 14,364,526 | 1  | 0 | 4  | no  | TE |
| at_locus.01064 | 1 | 14,364,880 | 14,365,264 | 9  | 0 | 8  | no  | TE |
| at_locus.01065 | 1 | 14,365,576 | 14,365,902 | 6  | 0 | 5  | no  | TE |
| at_locus.01066 | 1 | 14,367,079 | 14,367,238 | 10 | 0 | 9  | no  | TE |
| at_locus.01067 | 1 | 14,367,824 | 14,368,032 | 0  | 0 | 4  | no  | TE |
| at_locus.01068 | 1 | 14,368,369 | 14,368,778 | 1  | 0 | 7  | no  | TE |
| at_locus.01069 | 1 | 14,369,213 | 14,369,324 | 1  | 0 | 4  | no  |    |
| at_locus.01070 | 1 | 14,376,398 | 14,376,938 | 9  | 0 | 11 | no  | TE |
| at_locus.01071 | 1 | 14,382,366 | 14,383,348 | 6  | 0 | 13 | no  | TE |
| at_locus.01072 | 1 | 14,385,951 | 14,387,026 | 16 | 4 | 27 | no  | TE |
| at_locus.01073 | 1 | 14,387,593 | 14,388,018 | 7  | 0 | 10 | no  | TE |
| at_locus.01074 | 1 | 14,389,278 | 14,389,593 | 3  | 0 | 4  | no  | TE |
| at_locus.01075 | 1 | 14,392,219 | 14,392,309 | 0  | 0 | 4  | no  | TE |
| at_locus.01076 | 1 | 14,392,359 | 14,392,549 | 4  | 0 | 0  | no  | TE |
| at_locus.01077 | 1 | 14,393,160 | 14,394,380 | 18 | 0 | 5  | no  | TE |
| at_locus.01078 | 1 | 14,395,959 | 14,396,527 | 1  | 0 | 4  | no  | TE |
| at_locus.01079 | 1 | 14,396,845 | 14,397,080 | 0  | 0 | 4  | no  | TE |
| at_locus.01080 | 1 | 14,404,914 | 14,405,045 | 4  | 0 | 6  | no  | TE |
| at_locus.01081 | 1 | 14,407,543 | 14,407,613 | 4  | 0 | 0  | no  | TE |
| at_locus.01082 | 1 | 14,409,866 | 14,410,179 | 1  | 0 | 4  | no  | TE |
| at_locus.01083 | 1 | 14,410,533 | 14,410,917 | 9  | 0 | 8  | no  | TE |

|                |   |            |            |    |   |    |     |    |
|----------------|---|------------|------------|----|---|----|-----|----|
| at_locus.01084 | 1 | 14,411,229 | 14,411,555 | 6  | 0 | 5  | no  | TE |
| at_locus.01085 | 1 | 14,412,732 | 14,412,891 | 10 | 0 | 9  | no  | TE |
| at_locus.01086 | 1 | 14,413,477 | 14,413,685 | 0  | 0 | 4  | no  | TE |
| at_locus.01087 | 1 | 14,414,022 | 14,414,431 | 1  | 0 | 7  | no  | TE |
| at_locus.01088 | 1 | 14,414,866 | 14,414,977 | 1  | 0 | 4  | no  |    |
| at_locus.01089 | 1 | 14,422,051 | 14,422,591 | 9  | 0 | 11 | no  | TE |
| at_locus.01090 | 1 | 14,428,019 | 14,429,001 | 6  | 0 | 13 | no  | TE |
| at_locus.01091 | 1 | 14,431,604 | 14,432,882 | 22 | 4 | 34 | no  | TE |
| at_locus.01092 | 1 | 14,435,207 | 14,436,838 | 22 | 4 | 21 | yes | TE |
| at_locus.01093 | 1 | 14,437,213 | 14,437,644 | 4  | 0 | 8  | no  | TE |
| at_locus.01094 | 1 | 14,437,849 | 14,437,900 | 0  | 0 | 4  | no  | TE |
| at_locus.01095 | 1 | 14,438,265 | 14,438,577 | 11 | 0 | 7  | no  | TE |
| at_locus.01096 | 1 | 14,439,161 | 14,442,083 | 56 | 2 | 50 | yes | TE |
| at_locus.01097 | 1 | 14,442,342 | 14,442,458 | 4  | 0 | 2  | no  | TE |
| at_locus.01098 | 1 | 14,443,130 | 14,443,310 | 10 | 0 | 6  | no  | TE |
| at_locus.01099 | 1 | 14,444,344 | 14,444,569 | 2  | 0 | 4  | no  | TE |
| at_locus.01100 | 1 | 14,444,832 | 14,445,470 | 11 | 1 | 9  | no  | TE |
| at_locus.01101 | 1 | 14,448,576 | 14,448,705 | 4  | 0 | 2  | no  | TE |
| at_locus.01102 | 1 | 14,449,085 | 14,449,253 | 4  | 0 | 1  | no  | TE |
| at_locus.01103 | 1 | 14,451,727 | 14,453,885 | 22 | 2 | 38 | yes | TE |
| at_locus.01104 | 1 | 14,454,452 | 14,454,900 | 4  | 0 | 10 | no  | TE |
| at_locus.01105 | 1 | 14,456,160 | 14,456,475 | 3  | 0 | 4  | no  | TE |
| at_locus.01106 | 1 | 14,458,707 | 14,458,771 | 1  | 0 | 5  | no  | TE |
| at_locus.01107 | 1 | 14,459,102 | 14,459,192 | 0  | 0 | 4  | no  | TE |
| at_locus.01108 | 1 | 14,459,242 | 14,459,432 | 4  | 0 | 0  | no  | TE |
| at_locus.01109 | 1 | 14,460,043 | 14,461,268 | 18 | 0 | 4  | no  | TE |
| at_locus.01110 | 1 | 14,463,738 | 14,464,073 | 8  | 0 | 10 | no  | TE |
| at_locus.01111 | 1 | 14,469,801 | 14,470,113 | 1  | 0 | 4  | no  | TE |
| at_locus.01112 | 1 | 14,475,378 | 14,475,763 | 9  | 0 | 7  | no  | TE |
| at_locus.01113 | 1 | 14,476,044 | 14,476,240 | 6  | 0 | 6  | no  | TE |
| at_locus.01114 | 1 | 14,477,606 | 14,477,674 | 4  | 0 | 5  | no  | TE |
| at_locus.01115 | 1 | 14,477,944 | 14,478,566 | 5  | 0 | 4  | no  | TE |
| at_locus.01116 | 1 | 14,478,799 | 14,479,259 | 1  | 0 | 10 | no  | TE |
| at_locus.01117 | 1 | 14,480,999 | 14,481,237 | 0  | 0 | 4  | yes | TE |
| at_locus.01118 | 1 | 14,485,073 | 14,486,056 | 9  | 0 | 7  | yes | TE |
| at_locus.01119 | 1 | 14,486,336 | 14,486,686 | 1  | 0 | 5  | no  | TE |
| at_locus.01120 | 1 | 14,486,938 | 14,487,360 | 8  | 1 | 7  | no  | TE |

|                |   |            |            |    |   |    |     |    |
|----------------|---|------------|------------|----|---|----|-----|----|
| at_locus.01121 | 1 | 14,489,360 | 14,491,395 | 29 | 5 | 32 | yes | TE |
| at_locus.01122 | 1 | 14,491,601 | 14,494,052 | 53 | 0 | 46 | yes | TE |
| at_locus.01123 | 1 | 14,494,492 | 14,495,944 | 15 | 0 | 14 | yes | TE |
| at_locus.01124 | 1 | 14,496,449 | 14,496,688 | 2  | 0 | 4  | no  | TE |
| at_locus.01125 | 1 | 14,496,845 | 14,498,889 | 28 | 0 | 25 | no  | TE |
| at_locus.01126 | 1 | 14,499,424 | 14,499,942 | 12 | 0 | 7  | no  | TE |
| at_locus.01127 | 1 | 14,500,207 | 14,501,795 | 20 | 1 | 28 | yes | TE |
| at_locus.01128 | 1 | 14,502,278 | 14,502,528 | 2  | 0 | 5  | yes | TE |
| at_locus.01129 | 1 | 14,502,919 | 14,503,680 | 13 | 3 | 13 | yes | TE |
| at_locus.01130 | 1 | 14,503,984 | 14,504,679 | 9  | 1 | 7  | yes | TE |
| at_locus.01131 | 1 | 14,504,976 | 14,505,702 | 5  | 0 | 10 | no  | TE |
| at_locus.01132 | 1 | 14,506,877 | 14,507,394 | 7  | 0 | 12 | no  | TE |
| at_locus.01133 | 1 | 14,507,632 | 14,507,987 | 11 | 0 | 11 | no  | TE |
| at_locus.01134 | 1 | 14,508,444 | 14,508,489 | 6  | 0 | 4  | no  | TE |
| at_locus.01135 | 1 | 14,509,794 | 14,510,542 | 10 | 1 | 9  | no  | TE |
| at_locus.01136 | 1 | 14,510,873 | 14,511,709 | 11 | 1 | 11 | no  | TE |
| at_locus.01137 | 1 | 14,511,953 | 14,512,866 | 11 | 1 | 13 | yes | TE |
| at_locus.01138 | 1 | 14,513,330 | 14,513,799 | 4  | 1 | 4  | no  | TE |
| at_locus.01139 | 1 | 14,546,375 | 14,547,197 | 9  | 1 | 8  | yes | TE |
| at_locus.01140 | 1 | 14,547,527 | 14,548,135 | 8  | 1 | 8  | no  | TE |
| at_locus.01141 | 1 | 14,584,589 | 14,584,615 | 5  | 0 | 3  | no  | TE |
| at_locus.01142 | 1 | 14,586,475 | 14,587,731 | 6  | 0 | 13 | yes | TE |
| at_locus.01143 | 1 | 14,588,459 | 14,588,839 | 5  | 0 | 0  | no  | TE |
| at_locus.01144 | 1 | 14,589,267 | 14,589,639 | 8  | 0 | 9  | no  | TE |
| at_locus.01145 | 1 | 14,598,727 | 14,599,045 | 0  | 0 | 5  | no  | TE |
| at_locus.01146 | 1 | 14,599,218 | 14,599,486 | 6  | 0 | 0  | no  | TE |
| at_locus.01147 | 1 | 14,605,261 | 14,605,674 | 22 | 2 | 8  | no  | TE |
| at_locus.01148 | 1 | 14,607,940 | 14,608,065 | 0  | 0 | 7  | no  | TE |
| at_locus.01149 | 1 | 14,611,250 | 14,613,049 | 38 | 3 | 23 | no  | TE |
| at_locus.01150 | 1 | 14,659,894 | 14,660,076 | 3  | 0 | 5  | no  | TE |
| at_locus.01151 | 1 | 14,660,284 | 14,664,145 | 57 | 3 | 32 | yes | TE |
| at_locus.01152 | 1 | 14,665,467 | 14,666,129 | 13 | 0 | 5  | no  | TE |
| at_locus.01153 | 1 | 14,666,938 | 14,667,182 | 4  | 0 | 1  | no  | TE |
| at_locus.01154 | 1 | 14,667,659 | 14,667,706 | 0  | 0 | 4  | no  | TE |
| at_locus.01155 | 1 | 14,670,729 | 14,671,234 | 6  | 0 | 4  | no  | TE |
| at_locus.01156 | 1 | 14,671,516 | 14,676,116 | 37 | 3 | 27 | no  | TE |
| at_locus.01157 | 1 | 14,677,092 | 14,688,321 | 51 | 3 | 27 | no  | TE |

|                |   |            |            |    |   |    |     |    |
|----------------|---|------------|------------|----|---|----|-----|----|
| at_locus.01158 | 1 | 14,688,544 | 14,693,089 | 40 | 3 | 25 | yes | TE |
| at_locus.01159 | 1 | 14,693,233 | 14,698,016 | 34 | 4 | 22 | yes | TE |
| at_locus.01160 | 1 | 14,698,296 | 14,699,627 | 22 | 3 | 21 | no  | TE |
| at_locus.01161 | 1 | 14,699,683 | 14,700,593 | 26 | 3 | 13 | no  | TE |
| at_locus.01162 | 1 | 14,700,809 | 14,707,465 | 38 | 3 | 19 | no  | TE |
| at_locus.01163 | 1 | 14,707,616 | 14,711,347 | 36 | 5 | 22 | no  | TE |
| at_locus.01164 | 1 | 14,711,649 | 14,716,951 | 39 | 4 | 23 | no  | TE |
| at_locus.01165 | 1 | 14,717,278 | 14,717,522 | 4  | 0 | 1  | no  | TE |
| at_locus.01166 | 1 | 14,718,331 | 14,718,993 | 13 | 0 | 5  | no  | TE |
| at_locus.01167 | 1 | 14,720,315 | 14,747,659 | 66 | 3 | 38 | yes | TE |
| at_locus.01168 | 1 | 14,747,867 | 14,748,069 | 5  | 0 | 6  | no  | TE |
| at_locus.01169 | 1 | 14,748,420 | 14,749,074 | 15 | 1 | 11 | no  | TE |
| at_locus.01170 | 1 | 14,750,396 | 14,751,058 | 13 | 0 | 5  | no  | TE |
| at_locus.01171 | 1 | 14,751,867 | 14,752,111 | 4  | 0 | 1  | no  | TE |
| at_locus.01172 | 1 | 14,752,438 | 14,753,354 | 25 | 3 | 15 | no  | TE |
| at_locus.01173 | 1 | 14,806,466 | 14,808,218 | 28 | 3 | 16 | no  | TE |
| at_locus.01174 | 1 | 14,808,627 | 14,810,095 | 35 | 0 | 34 | no  | TE |
| at_locus.01175 | 1 | 14,810,339 | 14,810,799 | 6  | 0 | 8  | no  | TE |
| at_locus.01176 | 1 | 14,812,080 | 14,812,345 | 0  | 0 | 10 | no  | TE |
| at_locus.01177 | 1 | 14,813,599 | 14,813,689 | 2  | 0 | 4  | no  | TE |
| at_locus.01178 | 1 | 14,816,241 | 14,817,319 | 17 | 0 | 23 | no  | TE |
| at_locus.01179 | 1 | 14,817,568 | 14,817,736 | 12 | 0 | 6  | no  | TE |
| at_locus.01180 | 1 | 14,817,945 | 14,818,182 | 4  | 0 | 5  | no  | TE |
| at_locus.01181 | 1 | 14,818,759 | 14,818,982 | 5  | 0 | 1  | no  | TE |
| at_locus.01182 | 1 | 14,819,867 | 14,820,221 | 4  | 0 | 0  | no  | TE |
| at_locus.01183 | 1 | 14,821,494 | 14,825,605 | 45 | 3 | 26 | no  | TE |
| at_locus.01184 | 1 | 14,825,945 | 14,827,560 | 38 | 3 | 21 | no  | TE |
| at_locus.01185 | 1 | 14,828,544 | 14,829,049 | 6  | 0 | 4  | no  | TE |
| at_locus.01186 | 1 | 14,829,331 | 14,832,064 | 35 | 3 | 23 | no  | TE |
| at_locus.01187 | 1 | 14,833,040 | 14,834,263 | 26 | 3 | 16 | no  | TE |
| at_locus.01188 | 1 | 14,836,152 | 14,836,175 | 5  | 0 | 0  | no  | TE |
| at_locus.01189 | 1 | 14,836,456 | 14,836,653 | 1  | 0 | 4  | no  | TE |
| at_locus.01190 | 1 | 14,837,766 | 14,840,035 | 30 | 4 | 22 | no  | TE |
| at_locus.01191 | 1 | 14,840,543 | 14,840,918 | 4  | 0 | 3  | no  | TE |
| at_locus.01192 | 1 | 14,841,047 | 14,841,660 | 5  | 0 | 15 | no  | TE |
| at_locus.01193 | 1 | 14,844,298 | 14,845,100 | 9  | 1 | 4  | no  | TE |
| at_locus.01194 | 1 | 14,845,315 | 14,845,339 | 4  | 0 | 1  | no  | TE |



|                |   |            |            |    |   |    |     |    |
|----------------|---|------------|------------|----|---|----|-----|----|
| at_locus.01195 | 1 | 14,846,340 | 14,846,432 | 3  | 0 | 5  | no  | TE |
| at_locus.01196 | 1 | 14,848,528 | 14,849,007 | 8  | 0 | 8  | no  | TE |
| at_locus.01197 | 1 | 14,849,221 | 14,849,245 | 4  | 0 | 1  | no  | TE |
| at_locus.01198 | 1 | 14,849,876 | 14,849,918 | 6  | 0 | 0  | no  | TE |
| at_locus.01199 | 1 | 14,850,514 | 14,850,680 | 0  | 0 | 4  | no  | TE |
| at_locus.01200 | 1 | 14,851,363 | 14,852,574 | 21 | 0 | 12 | no  | TE |
| at_locus.01201 | 1 | 14,855,666 | 14,855,961 | 0  | 0 | 5  | no  | TE |
| at_locus.01202 | 1 | 14,856,528 | 14,856,738 | 2  | 0 | 4  | no  | TE |
| at_locus.01203 | 1 | 14,859,224 | 14,859,966 | 23 | 0 | 7  | no  | TE |
| at_locus.01204 | 1 | 14,860,735 | 14,860,782 | 0  | 0 | 4  | no  | TE |
| at_locus.01205 | 1 | 14,866,900 | 14,866,947 | 0  | 0 | 4  | no  | TE |
| at_locus.01206 | 1 | 14,867,716 | 14,868,458 | 23 | 0 | 7  | no  | TE |
| at_locus.01207 | 1 | 14,870,944 | 14,871,154 | 2  | 0 | 4  | no  | TE |
| at_locus.01208 | 1 | 14,871,721 | 14,872,016 | 0  | 0 | 5  | no  | TE |
| at_locus.01209 | 1 | 14,875,108 | 14,876,319 | 21 | 0 | 12 | no  | TE |
| at_locus.01210 | 1 | 14,877,002 | 14,877,168 | 0  | 0 | 4  | no  | TE |
| at_locus.01211 | 1 | 14,877,764 | 14,877,806 | 6  | 0 | 0  | no  | TE |
| at_locus.01212 | 1 | 14,878,437 | 14,878,461 | 4  | 0 | 1  | no  | TE |
| at_locus.01213 | 1 | 14,878,675 | 14,879,154 | 8  | 0 | 8  | no  | TE |
| at_locus.01214 | 1 | 14,881,250 | 14,881,342 | 3  | 0 | 5  | no  | TE |
| at_locus.01215 | 1 | 14,882,343 | 14,882,367 | 4  | 0 | 1  | no  | TE |
| at_locus.01216 | 1 | 14,882,582 | 14,883,384 | 9  | 1 | 4  | no  | TE |
| at_locus.01217 | 1 | 14,886,022 | 14,886,635 | 5  | 0 | 15 | no  | TE |
| at_locus.01218 | 1 | 14,886,764 | 14,887,139 | 4  | 0 | 3  | no  | TE |
| at_locus.01219 | 1 | 14,887,647 | 14,891,405 | 30 | 3 | 27 | yes | TE |
| at_locus.01220 | 1 | 14,891,667 | 14,894,390 | 30 | 4 | 20 | yes | TE |
| at_locus.01221 | 1 | 14,899,057 | 14,899,411 | 4  | 0 | 0  | no  | TE |
| at_locus.01222 | 1 | 14,900,296 | 14,900,519 | 5  | 0 | 1  | no  | TE |
| at_locus.01223 | 1 | 14,901,096 | 14,901,333 | 4  | 0 | 5  | no  | TE |
| at_locus.01224 | 1 | 14,901,542 | 14,901,710 | 12 | 0 | 6  | no  | TE |
| at_locus.01225 | 1 | 14,901,959 | 14,903,037 | 17 | 0 | 23 | no  | TE |
| at_locus.01226 | 1 | 14,905,589 | 14,905,679 | 2  | 0 | 4  | no  | TE |
| at_locus.01227 | 1 | 14,906,933 | 14,907,198 | 0  | 0 | 10 | no  | TE |
| at_locus.01228 | 1 | 14,908,479 | 14,908,939 | 6  | 0 | 8  | no  | TE |
| at_locus.01229 | 1 | 14,909,183 | 14,910,651 | 35 | 0 | 34 | no  | TE |
| at_locus.01230 | 1 | 14,911,060 | 14,913,152 | 31 | 4 | 20 | no  | TE |
| at_locus.01231 | 1 | 14,914,265 | 14,914,462 | 1  | 0 | 4  | no  | TE |

|                |   |            |            |     |   |     |     |    |
|----------------|---|------------|------------|-----|---|-----|-----|----|
| at_locus.01232 | 1 | 14,914,743 | 14,914,766 | 5   | 0 | 0   | no  | TE |
| at_locus.01233 | 1 | 14,926,389 | 14,926,546 | 2   | 0 | 4   | no  | TE |
| at_locus.01234 | 1 | 14,927,152 | 14,928,120 | 10  | 1 | 21  | no  | TE |
| at_locus.01235 | 1 | 14,928,783 | 14,960,822 |     |   |     | no  | TE |
| at_locus.01236 | 1 | 14,960,885 | 14,961,447 | 12  | 3 | 11  | no  | TE |
| at_locus.01237 | 1 | 14,961,655 | 14,962,079 | 12  | 3 | 11  | no  | TE |
| at_locus.01238 | 1 | 14,962,287 | 14,968,294 | 32  | 4 | 20  | no  | TE |
| at_locus.01239 | 1 | 14,968,502 | 14,973,277 | 28  | 3 | 20  | no  | TE |
| at_locus.01240 | 1 | 14,973,485 | 14,976,698 | 27  | 5 | 15  | no  | TE |
| at_locus.01241 | 1 | 14,976,906 | 15,001,458 | 43  | 4 | 25  | yes | TE |
| at_locus.01242 | 1 | 15,010,128 | 15,010,477 | 10  | 0 | 2   | no  | TE |
| at_locus.01243 | 1 | 15,012,146 | 15,012,982 | 17  | 4 | 9   | no  | TE |
| at_locus.01244 | 1 | 15,013,271 | 15,014,279 | 20  | 3 | 17  | yes | TE |
| at_locus.01245 | 1 | 15,014,286 | 15,030,159 | 62  | 7 | 63  | no  | TE |
| at_locus.01246 | 1 | 15,030,227 | 15,039,306 | 54  | 6 | 59  | yes | TE |
| at_locus.01247 | 1 | 15,039,633 | 15,040,656 | 23  | 3 | 17  | no  | TE |
| at_locus.01248 | 1 | 15,040,991 | 15,041,700 | 6   | 0 | 14  | no  | TE |
| at_locus.01249 | 1 | 15,042,270 | 15,042,611 | 4   | 0 | 3   | no  | TE |
| at_locus.01250 | 1 | 15,042,870 | 15,047,314 | 117 | 1 | 113 | no  | TE |
| at_locus.01251 | 1 | 15,048,239 | 15,048,458 | 4   | 0 | 3   | no  | TE |
| at_locus.01252 | 1 | 15,050,214 | 15,050,383 | 1   | 0 | 6   | no  | TE |
| at_locus.01253 | 1 | 15,051,115 | 15,051,414 | 0   | 0 | 12  | no  | TE |
| at_locus.01254 | 1 | 15,051,984 | 15,052,325 | 4   | 0 | 3   | no  | TE |
| at_locus.01255 | 1 | 15,052,584 | 15,055,751 | 94  | 4 | 84  | no  | TE |
| at_locus.01256 | 1 | 15,062,609 | 15,063,844 | 15  | 1 | 20  | no  | TE |
| at_locus.01257 | 1 | 15,064,068 | 15,064,721 | 12  | 0 | 7   | no  | TE |
| at_locus.01258 | 1 | 15,064,947 | 15,066,014 | 14  | 0 | 18  | no  | TE |
| at_locus.01259 | 1 | 15,066,257 | 15,068,214 | 28  | 1 | 31  | yes | TE |
| at_locus.01260 | 1 | 15,068,475 | 15,070,705 | 31  | 0 | 34  | yes | TE |
| at_locus.01261 | 1 | 15,072,527 | 15,073,188 | 13  | 0 | 9   | yes | TE |
| at_locus.01262 | 1 | 15,075,283 | 15,075,698 | 1   | 0 | 4   | no  | TE |
| at_locus.01263 | 1 | 15,075,865 | 15,076,360 | 7   | 0 | 4   | no  | TE |
| at_locus.01264 | 1 | 15,076,586 | 15,078,037 | 19  | 1 | 26  | yes | TE |
| at_locus.01265 | 1 | 15,078,239 | 15,078,996 | 5   | 0 | 11  | no  | TE |
| at_locus.01266 | 1 | 15,079,922 | 15,080,088 | 7   | 0 | 0   | no  | TE |
| at_locus.01267 | 1 | 15,080,605 | 15,080,925 | 4   | 0 | 7   | no  | TE |
| at_locus.01268 | 1 | 15,084,203 | 15,088,486 | 51  | 4 | 73  | yes | TE |

|                |   |            |            |    |   |    |     |    |
|----------------|---|------------|------------|----|---|----|-----|----|
| at_locus.01269 | 1 | 15,096,848 | 15,097,346 | 4  | 0 | 2  | no  | TE |
| at_locus.01270 | 1 | 15,102,623 | 15,103,012 | 3  | 0 | 0  | no  | TE |
| at_locus.01271 | 1 | 15,145,643 | 15,145,686 | 1  | 0 | 0  | no  |    |
| at_locus.01272 | 1 | 15,161,868 | 15,162,381 | 0  | 0 | 8  | yes | TE |
| at_locus.01273 | 1 | 15,170,433 | 15,170,750 | 4  | 0 | 0  | no  | TE |
| at_locus.01274 | 1 | 15,181,399 | 15,182,038 | 8  | 0 | 13 | no  | TE |
| at_locus.01275 | 1 | 15,182,231 | 15,184,630 | 30 | 1 | 50 | no  | TE |
| at_locus.01276 | 1 | 15,184,852 | 15,184,922 | 6  | 0 | 0  | no  | TE |
| at_locus.01277 | 1 | 15,185,091 | 15,186,100 | 21 | 0 | 12 | no  | TE |
| at_locus.01278 | 1 | 15,187,529 | 15,187,781 | 7  | 0 | 2  | no  | TE |
| at_locus.01279 | 1 | 15,188,047 | 15,188,280 | 0  | 0 | 4  | no  | TE |
| at_locus.01280 | 1 | 15,188,323 | 15,188,520 | 7  | 0 | 4  | no  | TE |
| at_locus.01281 | 1 | 15,188,893 | 15,189,264 | 4  | 0 | 6  | no  | TE |
| at_locus.01282 | 1 | 15,190,225 | 15,190,472 | 5  | 0 | 6  | no  | TE |
| at_locus.01283 | 1 | 15,190,802 | 15,193,040 | 47 | 0 | 48 | no  | TE |
| at_locus.01284 | 1 | 15,193,229 | 15,195,547 | 48 | 4 | 51 | no  | TE |
| at_locus.01285 | 1 | 15,202,968 | 15,203,404 | 0  | 0 | 5  | yes | TE |
| at_locus.01286 | 1 | 15,206,340 | 15,206,881 | 4  | 0 | 0  | no  | TE |
| at_locus.01287 | 1 | 15,209,518 | 15,209,777 | 2  | 0 | 0  | no  | TE |
| at_locus.01288 | 1 | 15,214,954 | 15,215,215 | 4  | 0 | 1  | no  | TE |
| at_locus.01289 | 1 | 15,215,503 | 15,215,714 | 4  | 0 | 1  | no  | TE |
| at_locus.01290 | 1 | 15,217,044 | 15,217,196 | 6  | 0 | 0  | no  | TE |
| at_locus.01291 | 1 | 15,224,345 | 15,224,729 | 3  | 0 | 0  | no  | TE |
| at_locus.01292 | 1 | 15,225,812 | 15,226,055 | 2  | 0 | 0  | no  | TE |
| at_locus.01293 | 1 | 15,242,991 | 15,243,303 | 6  | 0 | 1  | no  | TE |
| at_locus.01294 | 1 | 15,246,346 | 15,246,640 | 6  | 0 | 2  | no  | TE |
| at_locus.01295 | 1 | 15,254,297 | 15,254,678 | 3  | 0 | 2  | no  | TE |
| at_locus.01296 | 1 | 15,256,469 | 15,256,906 | 4  | 0 | 3  | no  | TE |
| at_locus.01297 | 1 | 15,267,886 | 15,268,033 | 1  | 0 | 0  | no  |    |
| at_locus.01298 | 1 | 15,275,075 | 15,275,125 | 1  | 0 | 0  | no  |    |
| at_locus.01299 | 1 | 15,276,998 | 15,277,502 | 0  | 0 | 4  | no  | TE |
| at_locus.01300 | 1 | 15,280,126 | 15,280,510 | 0  | 0 | 5  | no  | TE |
| at_locus.01301 | 1 | 15,282,187 | 15,282,613 | 3  | 1 | 1  | no  | TE |
| at_locus.01302 | 1 | 15,295,027 | 15,295,062 | 4  | 0 | 0  | no  | TE |
| at_locus.01303 | 1 | 15,315,200 | 15,315,335 | 1  | 0 | 4  | no  | TE |
| at_locus.01304 | 1 | 15,320,500 | 15,320,884 | 3  | 0 | 0  | no  | TE |
| at_locus.01305 | 1 | 15,321,968 | 15,322,211 | 2  | 0 | 0  | no  | TE |

|                |   |            |            |    |   |    |     |    |
|----------------|---|------------|------------|----|---|----|-----|----|
| at_locus.01306 | 1 | 15,340,110 | 15,340,422 | 6  | 0 | 1  | no  | TE |
| at_locus.01307 | 1 | 15,343,465 | 15,343,759 | 6  | 0 | 2  | no  | TE |
| at_locus.01308 | 1 | 15,352,394 | 15,352,775 | 3  | 0 | 2  | no  | TE |
| at_locus.01309 | 1 | 15,354,566 | 15,355,003 | 4  | 0 | 3  | no  | TE |
| at_locus.01310 | 1 | 15,365,983 | 15,366,130 | 1  | 0 | 0  | no  |    |
| at_locus.01311 | 1 | 15,373,172 | 15,373,222 | 1  | 0 | 0  | no  |    |
| at_locus.01312 | 1 | 15,375,095 | 15,375,599 | 0  | 0 | 4  | no  | TE |
| at_locus.01313 | 1 | 15,378,223 | 15,378,607 | 0  | 0 | 5  | no  | TE |
| at_locus.01314 | 1 | 15,380,284 | 15,380,717 | 3  | 1 | 1  | no  | TE |
| at_locus.01315 | 1 | 15,393,130 | 15,393,165 | 4  | 0 | 0  | no  | TE |
| at_locus.01316 | 1 | 15,413,282 | 15,413,417 | 1  | 0 | 4  | no  | TE |
| at_locus.01317 | 1 | 15,415,902 | 15,416,037 | 1  | 0 | 4  | no  | TE |
| at_locus.01318 | 1 | 15,416,651 | 15,417,119 | 10 | 0 | 20 | yes | TE |
| at_locus.01319 | 1 | 15,418,416 | 15,418,692 | 7  | 0 | 2  | yes | TE |
| at_locus.01320 | 1 | 15,418,945 | 15,419,725 | 20 | 0 | 12 | yes | TE |
| at_locus.01321 | 1 | 15,419,867 | 15,421,126 | 23 | 0 | 23 | no  | TE |
| at_locus.01322 | 1 | 15,421,754 | 15,421,978 | 8  | 0 | 11 | no  | TE |
| at_locus.01323 | 1 | 15,422,947 | 15,423,557 | 6  | 0 | 6  | no  | TE |
| at_locus.01324 | 1 | 15,424,487 | 15,424,632 | 2  | 0 | 4  | no  | TE |
| at_locus.01325 | 1 | 15,424,827 | 15,426,337 | 22 | 1 | 30 | no  | TE |
| at_locus.01326 | 1 | 15,434,285 | 15,434,722 | 5  | 0 | 10 | no  | TE |
| at_locus.01327 | 1 | 15,434,924 | 15,435,430 | 3  | 0 | 15 | no  | TE |
| at_locus.01328 | 1 | 15,438,936 | 15,439,340 | 3  | 1 | 5  | no  | TE |
| at_locus.01329 | 1 | 15,447,779 | 15,448,995 | 30 | 4 | 38 | no  | TE |
| at_locus.01330 | 1 | 15,449,262 | 15,449,487 | 4  | 0 | 5  | no  | TE |
| at_locus.01331 | 1 | 15,449,672 | 15,449,985 | 10 | 1 | 7  | no  | TE |
| at_locus.01332 | 1 | 15,450,391 | 15,450,628 | 8  | 0 | 11 | no  | TE |
| at_locus.01333 | 1 | 15,450,863 | 15,451,673 | 6  | 0 | 16 | yes | TE |
| at_locus.01334 | 1 | 15,452,670 | 15,453,329 | 12 | 0 | 8  | yes | TE |
| at_locus.01335 | 1 | 15,453,568 | 15,453,668 | 0  | 0 | 5  | yes | TE |
| at_locus.01336 | 1 | 15,453,891 | 15,454,711 | 14 | 1 | 14 | yes | TE |
| at_locus.01337 | 1 | 15,455,102 | 15,456,187 | 16 | 6 | 25 | yes | TE |
| at_locus.01338 | 1 | 15,457,929 | 15,458,523 | 17 | 0 | 9  | no  | TE |
| at_locus.01339 | 1 | 15,458,796 | 15,460,573 | 43 | 0 | 41 | no  | TE |
| at_locus.01340 | 1 | 15,462,408 | 15,464,239 | 18 | 0 | 31 | no  | TE |
| at_locus.01341 | 1 | 15,464,491 | 15,467,513 | 79 | 0 | 54 | no  | TE |
| at_locus.01342 | 1 | 15,469,348 | 15,471,178 | 18 | 0 | 34 | no  | TE |

|                |   |            |            |    |   |    |     |    |
|----------------|---|------------|------------|----|---|----|-----|----|
| at_locus.01343 | 1 | 15,471,430 | 15,474,452 | 76 | 0 | 44 | no  | TE |
| at_locus.01344 | 1 | 15,476,287 | 15,478,118 | 18 | 0 | 30 | no  | TE |
| at_locus.01345 | 1 | 15,478,370 | 15,481,393 | 80 | 0 | 56 | no  | TE |
| at_locus.01346 | 1 | 15,483,228 | 15,485,057 | 18 | 0 | 36 | no  | TE |
| at_locus.01347 | 1 | 15,485,310 | 15,488,375 | 74 | 1 | 62 | yes | TE |
| at_locus.01348 | 1 | 15,489,324 | 15,490,781 | 33 | 0 | 28 | no  | TE |
| at_locus.01349 | 1 | 15,494,375 | 15,495,844 | 24 | 1 | 32 | yes | TE |
| at_locus.01350 | 1 | 15,496,098 | 15,496,367 | 1  | 0 | 5  | no  | TE |
| at_locus.01351 | 1 | 15,496,618 | 15,497,229 | 11 | 0 | 16 | no  | TE |
| at_locus.01352 | 1 | 15,497,515 | 15,498,430 | 19 | 0 | 9  | no  | TE |
| at_locus.01353 | 1 | 15,500,448 | 15,500,547 | 6  | 0 | 2  | no  | TE |
| at_locus.01354 | 1 | 15,500,999 | 15,501,335 | 10 | 0 | 9  | no  | TE |
| at_locus.01355 | 1 | 15,503,015 | 15,503,083 | 0  | 0 | 7  | no  | TE |
| at_locus.01356 | 1 | 15,503,604 | 15,505,018 | 27 | 0 | 23 | yes | TE |
| at_locus.01357 | 1 | 15,505,218 | 15,506,479 | 23 | 0 | 30 | yes | TE |
| at_locus.01358 | 1 | 15,506,699 | 15,507,297 | 12 | 4 | 14 | no  | TE |
| at_locus.01359 | 1 | 15,507,709 | 15,508,058 | 1  | 0 | 9  | yes | TE |
| at_locus.01360 | 1 | 15,509,319 | 15,511,021 | 27 | 0 | 29 | yes | TE |
| at_locus.01361 | 1 | 15,515,126 | 15,516,010 | 11 | 0 | 13 | no  | TE |
| at_locus.01362 | 1 | 15,517,262 | 15,517,547 | 6  | 0 | 5  | no  | TE |
| at_locus.01363 | 1 | 15,519,164 | 15,519,394 | 2  | 0 | 6  | yes | TE |
| at_locus.01364 | 1 | 15,520,715 | 15,521,202 | 2  | 0 | 5  | no  | TE |
| at_locus.01365 | 1 | 15,527,478 | 15,527,883 | 5  | 1 | 5  | no  | TE |
| at_locus.01366 | 1 | 15,535,380 | 15,536,147 | 9  | 1 | 4  | yes | TE |
| at_locus.01367 | 1 | 15,536,353 | 15,537,144 | 9  | 0 | 5  | yes | TE |
| at_locus.01368 | 1 | 15,538,589 | 15,540,715 | 27 | 3 | 26 | yes | TE |
| at_locus.01369 | 1 | 15,540,942 | 15,541,535 | 9  | 0 | 11 | no  | TE |
| at_locus.01370 | 1 | 15,541,751 | 15,543,231 | 40 | 2 | 42 | yes | TE |
| at_locus.01371 | 1 | 15,544,842 | 15,545,086 | 4  | 0 | 2  | yes | TE |
| at_locus.01372 | 1 | 15,545,954 | 15,547,790 | 28 | 4 | 31 | yes | TE |
| at_locus.01373 | 1 | 15,553,145 | 15,553,559 | 7  | 0 | 4  | yes | TE |
| at_locus.01374 | 1 | 15,562,440 | 15,562,743 | 1  | 0 | 5  | no  | TE |
| at_locus.01375 | 1 | 15,564,333 | 15,564,553 | 13 | 0 | 3  | no  | TE |
| at_locus.01376 | 1 | 15,564,951 | 15,565,889 | 8  | 1 | 12 | no  | TE |
| at_locus.01377 | 1 | 15,567,088 | 15,567,346 | 1  | 0 | 5  | no  | TE |
| at_locus.01378 | 1 | 15,567,599 | 15,567,628 | 11 | 0 | 2  | no  | TE |
| at_locus.01379 | 1 | 15,567,880 | 15,568,504 | 9  | 0 | 6  | no  | TE |

|                |   |            |            |    |   |    |     |    |
|----------------|---|------------|------------|----|---|----|-----|----|
| at_locus.01380 | 1 | 15,568,733 | 15,568,926 | 0  | 0 | 4  | no  | TE |
| at_locus.01381 | 1 | 15,569,393 | 15,569,501 | 1  | 0 | 4  | no  | TE |
| at_locus.01382 | 1 | 15,570,584 | 15,571,024 | 9  | 0 | 4  | no  | TE |
| at_locus.01383 | 1 | 15,596,891 | 15,597,004 | 3  | 0 | 6  | no  | TE |
| at_locus.01384 | 1 | 15,599,610 | 15,599,731 | 5  | 0 | 3  | no  | TE |
| at_locus.01385 | 1 | 15,600,096 | 15,600,265 | 1  | 0 | 4  | no  | TE |
| at_locus.01386 | 1 | 15,602,092 | 15,602,115 | 2  | 0 | 5  | no  | TE |
| at_locus.01387 | 1 | 15,612,835 | 15,613,037 | 50 | 0 | 12 | yes |    |
| at_locus.01388 | 1 | 15,618,201 | 15,618,330 | 27 | 0 | 9  | no  |    |
| at_locus.01389 | 1 | 15,618,786 | 15,619,953 | 18 | 1 | 33 | no  | TE |
| at_locus.01390 | 1 | 15,620,200 | 15,620,371 | 4  | 0 | 1  | no  | TE |
| at_locus.01391 | 1 | 15,637,394 | 15,637,657 | 7  | 0 | 2  | no  | TE |
| at_locus.01392 | 1 | 15,637,914 | 15,638,364 | 8  | 0 | 7  | yes | TE |
| at_locus.01393 | 1 | 15,639,253 | 15,639,447 | 2  | 0 | 5  | no  | TE |
| at_locus.01394 | 1 | 15,639,899 | 15,639,956 | 9  | 0 | 3  | no  | TE |
| at_locus.01395 | 1 | 15,641,673 | 15,642,299 | 5  | 0 | 10 | no  | TE |
| at_locus.01396 | 1 | 15,652,263 | 15,652,291 | 4  | 0 | 0  | yes | TE |
| at_locus.01397 | 1 | 15,671,842 | 15,672,109 | 5  | 0 | 1  | no  | TE |
| at_locus.01398 | 1 | 15,676,512 | 15,676,946 | 3  | 0 | 5  | no  | TE |
| at_locus.01399 | 1 | 15,679,066 | 15,679,915 | 15 | 0 | 20 | no  | TE |
| at_locus.01400 | 1 | 15,683,224 | 15,683,561 | 4  | 0 | 0  | no  |    |
| at_locus.01401 | 1 | 15,684,632 | 15,686,129 | 23 | 4 | 25 | no  | TE |
| at_locus.01402 | 1 | 15,690,973 | 15,691,427 | 6  | 0 | 3  | no  | TE |
| at_locus.01403 | 1 | 15,693,055 | 15,693,171 | 2  | 0 | 5  | no  | TE |
| at_locus.01404 | 1 | 15,702,458 | 15,703,081 | 5  | 0 | 7  | no  | TE |
| at_locus.01405 | 1 | 15,703,330 | 15,704,031 | 22 | 0 | 6  | no  | TE |
| at_locus.01406 | 1 | 15,706,773 | 15,707,117 | 3  | 0 | 11 | no  | TE |
| at_locus.01407 | 1 | 15,707,346 | 15,707,770 | 6  | 0 | 7  | no  | TE |
| at_locus.01408 | 1 | 15,708,953 | 15,710,134 | 17 | 0 | 23 | yes | TE |
| at_locus.01409 | 1 | 15,710,187 | 15,710,467 | 4  | 0 | 5  | yes | TE |
| at_locus.01410 | 1 | 15,710,694 | 15,710,846 | 11 | 0 | 14 | no  | TE |
| at_locus.01411 | 1 | 15,711,073 | 15,711,361 | 11 | 2 | 6  | no  | TE |
| at_locus.01412 | 1 | 15,712,820 | 15,713,063 | 0  | 0 | 5  | no  | TE |
| at_locus.01413 | 1 | 15,714,711 | 15,715,053 | 4  | 0 | 6  | no  | TE |
| at_locus.01414 | 1 | 15,715,651 | 15,715,922 | 2  | 0 | 8  | no  | TE |
| at_locus.01415 | 1 | 15,716,169 | 15,716,512 | 3  | 1 | 7  | no  | TE |
| at_locus.01416 | 1 | 15,716,640 | 15,717,052 | 7  | 0 | 7  | no  | TE |

|                |   |            |            |    |   |    |     |    |
|----------------|---|------------|------------|----|---|----|-----|----|
| at_locus.01417 | 1 | 15,738,560 | 15,738,972 | 7  | 0 | 1  | no  | TE |
| at_locus.01418 | 1 | 15,739,429 | 15,739,815 | 7  | 0 | 3  | no  | TE |
| at_locus.01419 | 1 | 15,744,082 | 15,744,254 | 5  | 0 | 3  | no  | TE |
| at_locus.01420 | 1 | 15,749,787 | 15,750,021 | 3  | 1 | 5  | no  | TE |
| at_locus.01421 | 1 | 15,750,355 | 15,750,377 | 2  | 0 | 4  | no  | TE |
| at_locus.01422 | 1 | 15,763,153 | 15,763,316 | 17 | 0 | 0  | no  |    |
| at_locus.01423 | 1 | 15,786,972 | 15,787,953 | 41 | 0 | 28 | no  | TE |
| at_locus.01424 | 1 | 15,788,213 | 15,788,871 | 15 | 0 | 9  | no  | TE |
| at_locus.01425 | 1 | 15,792,655 | 15,794,329 | 18 | 4 | 33 | yes | TE |
| at_locus.01426 | 1 | 15,802,767 | 15,802,875 | 4  | 0 | 0  | no  | TE |
| at_locus.01427 | 1 | 15,803,742 | 15,803,963 | 8  | 1 | 23 | yes | TE |
| at_locus.01428 | 1 | 15,804,538 | 15,804,576 | 1  | 0 | 4  | no  | TE |
| at_locus.01429 | 1 | 15,804,953 | 15,805,099 | 4  | 0 | 2  | no  | TE |
| at_locus.01430 | 1 | 15,805,521 | 15,805,812 | 2  | 0 | 9  | yes | TE |
| at_locus.01431 | 1 | 15,806,147 | 15,806,477 | 1  | 0 | 5  | yes | TE |
| at_locus.01432 | 1 | 15,806,984 | 15,808,039 | 15 | 0 | 26 | yes | TE |
| at_locus.01433 | 1 | 15,809,555 | 15,809,737 | 4  | 0 | 1  | no  | TE |
| at_locus.01434 | 1 | 15,818,358 | 15,818,615 | 7  | 0 | 1  | no  | TE |
| at_locus.01435 | 1 | 15,824,137 | 15,825,998 | 24 | 0 | 42 | no  | TE |
| at_locus.01436 | 1 | 15,826,432 | 15,826,787 | 12 | 0 | 12 | no  | TE |
| at_locus.01437 | 1 | 15,826,999 | 15,829,143 | 39 | 0 | 37 | no  | TE |
| at_locus.01438 | 1 | 15,829,918 | 15,830,295 | 5  | 0 | 6  | no  | TE |
| at_locus.01439 | 1 | 15,830,668 | 15,830,865 | 6  | 0 | 4  | no  | TE |
| at_locus.01440 | 1 | 15,830,908 | 15,831,141 | 0  | 0 | 4  | no  | TE |
| at_locus.01441 | 1 | 15,831,406 | 15,831,658 | 7  | 0 | 2  | no  | TE |
| at_locus.01442 | 1 | 15,833,083 | 15,834,092 | 22 | 0 | 13 | no  | TE |
| at_locus.01443 | 1 | 15,834,297 | 15,834,334 | 4  | 0 | 1  | no  | TE |
| at_locus.01444 | 1 | 15,834,783 | 15,835,369 | 10 | 0 | 14 | no  | TE |
| at_locus.01445 | 1 | 15,835,514 | 15,838,202 | 43 | 3 | 60 | yes | TE |
| at_locus.01446 | 1 | 15,838,636 | 15,841,355 | 53 | 0 | 50 | no  | TE |
| at_locus.01447 | 1 | 15,842,130 | 15,842,199 | 4  | 0 | 2  | no  | TE |
| at_locus.01448 | 1 | 15,842,880 | 15,843,077 | 6  | 0 | 4  | no  | TE |
| at_locus.01449 | 1 | 15,843,120 | 15,843,353 | 0  | 0 | 4  | no  | TE |
| at_locus.01450 | 1 | 15,843,619 | 15,843,871 | 7  | 0 | 2  | no  | TE |
| at_locus.01451 | 1 | 15,845,300 | 15,846,241 | 21 | 0 | 16 | yes | TE |
| at_locus.01452 | 1 | 15,846,916 | 15,847,585 | 9  | 0 | 17 | no  | TE |
| at_locus.01453 | 1 | 15,847,730 | 15,850,129 | 28 | 3 | 50 | no  | TE |

|                |   |            |            |     |   |     |     |    |
|----------------|---|------------|------------|-----|---|-----|-----|----|
| at_locus.01454 | 1 | 15,855,939 | 15,856,111 | 5   | 0 | 3   | no  | TE |
| at_locus.01455 | 1 | 15,873,293 | 15,873,596 | 1   | 0 | 5   | no  | TE |
| at_locus.01456 | 1 | 15,889,061 | 15,889,374 | 9   | 0 | 2   | yes |    |
| at_locus.01457 | 1 | 15,923,863 | 15,924,036 | 4   | 0 | 1   | no  |    |
| at_locus.01458 | 1 | 15,937,967 | 15,938,108 | 9   | 0 | 0   | yes | TE |
| at_locus.01459 | 1 | 15,941,763 | 15,941,831 | 10  | 0 | 0   | no  | TE |
| at_locus.01460 | 1 | 15,942,243 | 15,943,621 | 95  | 8 | 1   | no  | TE |
| at_locus.01461 | 1 | 15,946,853 | 15,947,176 | 25  | 0 | 24  | no  |    |
| at_locus.01462 | 1 | 15,965,779 | 15,965,805 | 5   | 0 | 0   | yes | TE |
| at_locus.01463 | 1 | 15,992,725 | 15,993,172 | 0   | 0 | 5   | yes |    |
| at_locus.01464 | 1 | 16,000,631 | 16,000,654 | 0   | 0 | 5   | yes |    |
| at_locus.01465 | 1 | 16,006,849 | 16,007,280 | 5   | 0 | 3   | yes | TE |
| at_locus.01466 | 1 | 16,015,120 | 16,016,562 | 75  | 4 | 17  | no  | TE |
| at_locus.01467 | 1 | 16,016,783 | 16,022,109 | 130 | 4 | 160 | yes | TE |
| at_locus.01468 | 1 | 16,041,022 | 16,041,244 | 1   | 0 | 6   | no  | TE |
| at_locus.01469 | 1 | 16,047,998 | 16,048,330 | 7   | 0 | 2   | no  | TE |
| at_locus.01470 | 1 | 16,049,166 | 16,049,339 | 2   | 0 | 4   | no  | TE |
| at_locus.01471 | 1 | 16,050,438 | 16,050,939 | 0   | 0 | 5   | yes | TE |
| at_locus.01472 | 1 | 16,052,931 | 16,053,279 | 5   | 0 | 5   | yes | TE |
| at_locus.01473 | 1 | 16,082,406 | 16,082,577 | 4   | 0 | 2   | no  | TE |
| at_locus.01474 | 1 | 16,084,357 | 16,084,759 | 5   | 0 | 1   | no  | TE |
| at_locus.01475 | 1 | 16,095,099 | 16,095,311 | 8   | 0 | 9   | no  | TE |
| at_locus.01476 | 1 | 16,096,881 | 16,097,469 | 1   | 0 | 8   | yes | TE |
| at_locus.01477 | 1 | 16,097,771 | 16,097,817 | 8   | 0 | 6   | no  | TE |
| at_locus.01478 | 1 | 16,101,290 | 16,101,595 | 5   | 0 | 0   | no  | TE |
| at_locus.01479 | 1 | 16,102,838 | 16,103,018 | 0   | 0 | 4   | no  | TE |
| at_locus.01480 | 1 | 16,106,244 | 16,106,396 | 4   | 0 | 0   | no  | TE |
| at_locus.01481 | 1 | 16,106,452 | 16,106,763 | 1   | 0 | 5   | no  | TE |
| at_locus.01482 | 1 | 16,116,779 | 16,116,952 | 4   | 0 | 2   | no  | TE |
| at_locus.01483 | 1 | 16,119,043 | 16,119,073 | 8   | 0 | 1   | no  | TE |
| at_locus.01484 | 1 | 16,120,232 | 16,120,339 | 7   | 0 | 1   | yes | TE |
| at_locus.01485 | 1 | 16,125,740 | 16,126,188 | 3   | 0 | 6   | no  | TE |
| at_locus.01486 | 1 | 16,145,459 | 16,145,820 | 4   | 0 | 4   | yes |    |
| at_locus.01487 | 1 | 16,163,832 | 16,163,874 | 4   | 0 | 0   | yes | TE |
| at_locus.01488 | 1 | 16,164,509 | 16,164,872 | 34  | 1 | 16  | yes |    |
| at_locus.01489 | 1 | 16,167,755 | 16,168,386 | 18  | 0 | 4   | yes |    |
| at_locus.01490 | 1 | 16,168,992 | 16,169,344 | 5   | 0 | 2   | yes |    |



|                |   |            |            |    |   |    |     |    |
|----------------|---|------------|------------|----|---|----|-----|----|
| at_locus.01491 | 1 | 16,170,197 | 16,170,389 | 4  | 0 | 6  | yes | TE |
| at_locus.01492 | 1 | 16,176,904 | 16,177,204 | 4  | 0 | 4  | no  | TE |
| at_locus.01493 | 1 | 16,192,361 | 16,192,383 | 0  | 0 | 4  | no  | TE |
| at_locus.01494 | 1 | 16,193,796 | 16,194,108 | 4  | 0 | 1  | no  | TE |
| at_locus.01495 | 1 | 16,200,734 | 16,200,898 | 4  | 0 | 1  | no  | TE |
| at_locus.01496 | 1 | 16,201,971 | 16,202,310 | 6  | 0 | 1  | yes | TE |
| at_locus.01497 | 1 | 16,204,451 | 16,204,936 | 7  | 1 | 2  | yes | TE |
| at_locus.01498 | 1 | 16,208,355 | 16,209,329 | 5  | 0 | 2  | no  | TE |
| at_locus.01499 | 1 | 16,214,121 | 16,214,153 | 1  | 0 | 4  | no  | TE |
| at_locus.01500 | 1 | 16,214,655 | 16,214,827 | 22 | 0 | 18 | no  | TE |
| at_locus.01501 | 1 | 16,215,987 | 16,216,064 | 0  | 0 | 5  | no  | TE |
| at_locus.01502 | 1 | 16,240,457 | 16,240,730 | 4  | 1 | 7  | yes | TE |
| at_locus.01503 | 1 | 16,248,420 | 16,249,079 | 13 | 2 | 7  | yes | TE |
| at_locus.01504 | 1 | 16,250,178 | 16,250,637 | 5  | 0 | 5  | yes |    |
| at_locus.01505 | 1 | 16,254,444 | 16,254,477 | 4  | 0 | 3  | no  |    |
| at_locus.01506 | 1 | 16,255,221 | 16,255,368 | 52 | 0 | 3  | yes | TE |
| at_locus.01507 | 1 | 16,255,850 | 16,256,191 | 0  | 0 | 3  | no  | TE |
| at_locus.01508 | 1 | 16,256,239 | 16,256,474 | 21 | 0 | 0  | no  | TE |
| at_locus.01509 | 1 | 16,258,641 | 16,258,674 | 10 | 0 | 0  | no  |    |
| at_locus.01510 | 1 | 16,261,107 | 16,261,362 | 14 | 0 | 0  | no  | TE |
| at_locus.01511 | 1 | 16,262,086 | 16,262,230 | 31 | 0 | 3  | no  | TE |
| at_locus.01512 | 1 | 16,264,601 | 16,264,764 | 6  | 0 | 0  | no  | TE |
| at_locus.01513 | 1 | 16,270,033 | 16,270,140 | 5  | 5 | 0  | yes |    |
| at_locus.01514 | 1 | 16,276,551 | 16,276,979 | 5  | 0 | 10 | yes |    |
| at_locus.01515 | 1 | 16,284,657 | 16,286,140 | 19 | 2 | 20 | yes | TE |
| at_locus.01516 | 1 | 16,286,668 | 16,287,238 | 1  | 0 | 8  | no  | TE |
| at_locus.01517 | 1 | 16,287,683 | 16,288,470 | 5  | 0 | 40 | no  | TE |
| at_locus.01518 | 1 | 16,288,708 | 16,290,881 | 14 | 0 | 66 | yes | TE |
| at_locus.01519 | 1 | 16,291,446 | 16,292,279 | 3  | 0 | 14 | no  | TE |
| at_locus.01520 | 1 | 16,292,958 | 16,294,628 | 4  | 3 | 44 | yes | TE |
| at_locus.01521 | 1 | 16,295,668 | 16,295,806 | 1  | 0 | 4  | no  |    |
| at_locus.01522 | 1 | 16,296,506 | 16,297,241 | 10 | 1 | 38 | no  | TE |
| at_locus.01523 | 1 | 16,298,910 | 16,299,177 | 0  | 0 | 6  | no  | TE |
| at_locus.01524 | 1 | 16,299,622 | 16,300,452 | 5  | 0 | 40 | no  | TE |
| at_locus.01525 | 1 | 16,300,690 | 16,303,122 | 15 | 1 | 67 | yes | TE |
| at_locus.01526 | 1 | 16,303,386 | 16,303,548 | 1  | 0 | 4  | no  | TE |
| at_locus.01527 | 1 | 16,303,783 | 16,304,220 | 2  | 0 | 9  | yes | TE |

|                |   |            |            |     |   |    |     |    |
|----------------|---|------------|------------|-----|---|----|-----|----|
| at_locus.01528 | 1 | 16,304,899 | 16,306,248 | 2   | 3 | 32 | yes | TE |
| at_locus.01529 | 1 | 16,306,668 | 16,306,806 | 1   | 0 | 4  | no  |    |
| at_locus.01530 | 1 | 16,307,506 | 16,308,241 | 10  | 1 | 38 | no  | TE |
| at_locus.01531 | 1 | 16,313,778 | 16,314,010 | 0   | 1 | 5  | yes | TE |
| at_locus.01532 | 1 | 16,327,736 | 16,327,925 | 5   | 0 | 0  | yes | TE |
| at_locus.01533 | 1 | 16,328,593 | 16,330,130 | 75  | 2 | 15 | yes | TE |
| at_locus.01534 | 1 | 16,330,338 | 16,331,043 | 174 | 4 | 69 | yes |    |
| at_locus.01535 | 1 | 16,331,335 | 16,331,817 | 13  | 0 | 17 | yes | TE |
| at_locus.01536 | 1 | 16,343,649 | 16,343,903 | 6   | 0 | 0  | yes | TE |
| at_locus.01537 | 1 | 16,345,331 | 16,345,398 | 6   | 0 | 2  | yes | TE |
| at_locus.01538 | 1 | 16,352,863 | 16,353,133 | 10  | 0 | 2  | yes |    |
| at_locus.01539 | 1 | 16,353,342 | 16,353,947 | 20  | 0 | 15 | yes | TE |
| at_locus.01540 | 1 | 16,354,481 | 16,355,010 | 20  | 0 | 18 | yes | TE |
| at_locus.01541 | 1 | 16,355,245 | 16,355,558 | 4   | 0 | 1  | yes |    |
| at_locus.01542 | 1 | 16,355,998 | 16,356,551 | 11  | 0 | 19 | yes | TE |
| at_locus.01543 | 1 | 16,357,161 | 16,357,298 | 17  | 0 | 6  | yes |    |
| at_locus.01544 | 1 | 16,357,511 | 16,357,583 | 11  | 0 | 0  | yes |    |
| at_locus.01545 | 1 | 16,357,714 | 16,358,668 | 23  | 0 | 16 | yes |    |
| at_locus.01546 | 1 | 16,359,328 | 16,359,677 | 11  | 0 | 12 | yes |    |
| at_locus.01547 | 1 | 16,361,941 | 16,362,243 | 17  | 0 | 11 | yes |    |
| at_locus.01548 | 1 | 16,362,534 | 16,363,552 | 50  | 2 | 12 | yes | TE |
| at_locus.01549 | 1 | 16,363,697 | 16,363,785 | 1   | 0 | 6  | no  | TE |
| at_locus.01550 | 1 | 16,365,778 | 16,365,855 | 5   | 0 | 0  | yes |    |
| at_locus.01551 | 1 | 16,366,520 | 16,366,672 | 4   | 0 | 2  | yes |    |
| at_locus.01552 | 1 | 16,366,908 | 16,367,852 | 27  | 0 | 16 | yes | TE |
| at_locus.01553 | 1 | 16,368,106 | 16,369,200 | 36  | 1 | 19 | yes |    |
| at_locus.01554 | 1 | 16,369,474 | 16,369,934 | 1   | 0 | 4  | yes |    |
| at_locus.01555 | 1 | 16,370,529 | 16,370,768 | 4   | 0 | 2  | yes | TE |
| at_locus.01556 | 1 | 16,370,916 | 16,371,370 | 3   | 0 | 6  | yes | TE |
| at_locus.01557 | 1 | 16,380,672 | 16,380,844 | 4   | 0 | 2  | no  | TE |
| at_locus.01558 | 1 | 16,381,090 | 16,381,398 | 6   | 0 | 3  | no  | TE |
| at_locus.01559 | 1 | 16,382,586 | 16,383,132 | 9   | 0 | 2  | yes | TE |
| at_locus.01560 | 1 | 16,383,794 | 16,385,605 | 30  | 0 | 30 | yes | TE |
| at_locus.01561 | 1 | 16,385,728 | 16,386,191 | 4   | 0 | 5  | yes | TE |
| at_locus.01562 | 1 | 16,386,406 | 16,386,498 | 0   | 0 | 6  | no  | TE |
| at_locus.01563 | 1 | 16,386,707 | 16,386,942 | 2   | 0 | 7  | yes | TE |
| at_locus.01564 | 1 | 16,387,144 | 16,387,248 | 0   | 0 | 5  | no  | TE |

|                |   |            |            |     |     |     |     |    |
|----------------|---|------------|------------|-----|-----|-----|-----|----|
| at_locus.01565 | 1 | 16,387,531 | 16,388,861 | 24  | 1   | 45  | yes | TE |
| at_locus.01566 | 1 | 16,389,110 | 16,389,722 | 24  | 1   | 8   | no  | TE |
| at_locus.01567 | 1 | 16,389,888 | 16,390,119 | 6   | 0   | 0   | yes | TE |
| at_locus.01568 | 1 | 16,402,924 | 16,403,441 | 43  | 0   | 0   | yes | TE |
| at_locus.01569 | 1 | 16,406,271 | 16,406,297 | 5   | 0   | 0   | no  | TE |
| at_locus.01570 | 1 | 16,407,317 | 16,407,417 | 2   | 0   | 5   | yes |    |
| at_locus.01571 | 1 | 16,407,658 | 16,407,828 | 7   | 0   | 3   | yes |    |
| at_locus.01572 | 1 | 16,409,624 | 16,410,126 | 5   | 0   | 5   | no  | TE |
| at_locus.01573 | 1 | 16,416,458 | 16,416,862 | 5   | 0   | 0   | yes | TE |
| at_locus.01574 | 1 | 16,421,090 | 16,421,405 | 55  | 4   | 2   | yes |    |
| at_locus.01575 | 1 | 16,423,294 | 16,423,556 | 20  | 0   | 2   | yes |    |
| at_locus.01576 | 1 | 16,425,619 | 16,425,650 | 4   | 0   | 0   | yes | TE |
| at_locus.01577 | 1 | 16,433,392 | 16,433,666 | 30  | 77  | 64  | yes |    |
| at_locus.01578 | 1 | 16,433,969 | 16,434,164 | 0   | 7   | 6   | yes |    |
| at_locus.01579 | 1 | 16,434,457 | 16,434,549 | 1   | 23  | 19  | yes |    |
| at_locus.01580 | 1 | 16,434,911 | 16,435,106 | 5   | 7   | 5   | yes |    |
| at_locus.01581 | 1 | 16,435,402 | 16,435,502 | 5   | 6   | 17  | no  |    |
| at_locus.01582 | 1 | 16,435,804 | 16,436,545 | 122 | 192 | 121 | no  |    |
| at_locus.01583 | 1 | 16,455,103 | 16,455,685 | 9   | 0   | 7   | yes |    |
| at_locus.01584 | 1 | 16,457,708 | 16,457,862 | 7   | 0   | 1   | yes | TE |
| at_locus.01585 | 1 | 16,458,824 | 16,459,065 | 5   | 0   | 1   | no  | TE |
| at_locus.01586 | 1 | 16,459,829 | 16,460,125 | 5   | 0   | 0   | yes | TE |
| at_locus.01587 | 1 | 16,460,791 | 16,461,034 | 4   | 0   | 0   | no  | TE |
| at_locus.01588 | 1 | 16,477,063 | 16,477,828 | 15  | 0   | 5   | yes | TE |
| at_locus.01589 | 1 | 16,478,087 | 16,478,269 | 4   | 0   | 2   | no  | TE |
| at_locus.01590 | 1 | 16,478,606 | 16,478,780 | 4   | 0   | 0   | no  | TE |
| at_locus.01591 | 1 | 16,479,178 | 16,479,258 | 5   | 0   | 1   | no  | TE |
| at_locus.01592 | 1 | 16,480,183 | 16,480,221 | 7   | 0   | 0   | no  | TE |
| at_locus.01593 | 1 | 16,500,318 | 16,500,432 | 6   | 0   | 3   | yes |    |
| at_locus.01594 | 1 | 16,502,125 | 16,502,301 | 4   | 0   | 1   | yes |    |
| at_locus.01595 | 1 | 16,512,848 | 16,512,925 | 0   | 0   | 5   | no  | TE |
| at_locus.01596 | 1 | 16,514,073 | 16,514,384 | 30  | 0   | 22  | no  | TE |
| at_locus.01597 | 1 | 16,515,400 | 16,515,647 | 6   | 0   | 0   | yes | TE |
| at_locus.01598 | 1 | 16,515,792 | 16,517,580 | 85  | 0   | 43  | yes | TE |
| at_locus.01599 | 1 | 16,518,125 | 16,518,704 | 11  | 1   | 9   | no  | TE |
| at_locus.01600 | 1 | 16,519,068 | 16,519,158 | 1   | 0   | 5   | no  | TE |
| at_locus.01601 | 1 | 16,519,475 | 16,520,187 | 6   | 0   | 7   | yes | TE |

|                |   |            |            |    |   |    |     |    |
|----------------|---|------------|------------|----|---|----|-----|----|
| at_locus.01602 | 1 | 16,521,945 | 16,521,967 | 0  | 0 | 4  | no  | TE |
| at_locus.01603 | 1 | 16,523,170 | 16,523,520 | 14 | 0 | 17 | no  | TE |
| at_locus.01604 | 1 | 16,524,537 | 16,526,703 | 87 | 0 | 46 | yes | TE |
| at_locus.01605 | 1 | 16,527,248 | 16,527,827 | 13 | 1 | 10 | no  | TE |
| at_locus.01606 | 1 | 16,528,191 | 16,528,281 | 1  | 0 | 5  | no  | TE |
| at_locus.01607 | 1 | 16,528,598 | 16,529,019 | 3  | 0 | 4  | no  | TE |
| at_locus.01608 | 1 | 16,530,350 | 16,530,427 | 0  | 0 | 5  | no  | TE |
| at_locus.01609 | 1 | 16,540,991 | 16,541,016 | 4  | 0 | 0  | yes |    |
| at_locus.01610 | 1 | 16,547,333 | 16,547,356 | 5  | 0 | 0  | no  | TE |
| at_locus.01611 | 1 | 16,564,803 | 16,564,827 | 6  | 0 | 0  | yes |    |
| at_locus.01612 | 1 | 16,593,413 | 16,594,144 | 23 | 0 | 2  | yes | TE |
| at_locus.01613 | 1 | 16,594,188 | 16,594,494 | 0  | 0 | 4  | no  | TE |
| at_locus.01614 | 1 | 16,595,406 | 16,595,480 | 19 | 0 | 2  | no  | TE |
| at_locus.01615 | 1 | 16,596,642 | 16,596,926 | 8  | 0 | 3  | yes |    |
| at_locus.01616 | 1 | 16,597,696 | 16,598,605 | 22 | 0 | 8  | yes | TE |
| at_locus.01617 | 1 | 16,598,932 | 16,600,058 | 19 | 0 | 11 | no  | TE |
| at_locus.01618 | 1 | 16,600,266 | 16,601,381 | 22 | 1 | 16 | yes | TE |
| at_locus.01619 | 1 | 16,602,046 | 16,602,184 | 4  | 0 | 1  | yes |    |
| at_locus.01620 | 1 | 16,602,794 | 16,603,103 | 7  | 0 | 4  | yes |    |
| at_locus.01621 | 1 | 16,603,308 | 16,603,930 | 16 | 0 | 9  | yes |    |
| at_locus.01622 | 1 | 16,605,138 | 16,605,337 | 10 | 0 | 6  | yes |    |
| at_locus.01623 | 1 | 16,606,430 | 16,607,225 | 38 | 1 | 19 | yes |    |
| at_locus.01624 | 1 | 16,608,006 | 16,608,321 | 7  | 0 | 1  | yes |    |
| at_locus.01625 | 1 | 16,615,749 | 16,616,055 | 28 | 0 | 0  | yes | TE |
| at_locus.01626 | 1 | 16,616,652 | 16,616,691 | 7  | 0 | 0  | no  | TE |
| at_locus.01627 | 1 | 16,626,978 | 16,627,153 | 8  | 0 | 1  | yes | TE |
| at_locus.01628 | 1 | 16,628,083 | 16,628,319 | 6  | 0 | 1  | yes | TE |
| at_locus.01629 | 1 | 16,628,577 | 16,629,202 | 4  | 0 | 2  | no  | TE |
| at_locus.01630 | 1 | 16,634,179 | 16,634,560 | 0  | 0 | 4  | yes | TE |
| at_locus.01631 | 1 | 16,639,687 | 16,639,786 | 5  | 0 | 0  | yes |    |
| at_locus.01632 | 1 | 16,648,290 | 16,648,395 | 8  | 0 | 0  | yes |    |
| at_locus.01633 | 1 | 16,653,191 | 16,653,327 | 12 | 0 | 1  | yes |    |
| at_locus.01634 | 1 | 16,668,835 | 16,668,868 | 6  | 0 | 0  | yes |    |
| at_locus.01635 | 1 | 16,676,147 | 16,676,269 | 4  | 0 | 11 | yes |    |
| at_locus.01636 | 1 | 16,684,084 | 16,684,487 | 6  | 0 | 1  | yes | TE |
| at_locus.01637 | 1 | 16,695,779 | 16,696,090 | 5  | 0 | 1  | no  | TE |
| at_locus.01638 | 1 | 16,701,662 | 16,701,912 | 5  | 0 | 0  | no  | TE |

|                |   |            |            |    |   |    |     |    |
|----------------|---|------------|------------|----|---|----|-----|----|
| at_locus.01639 | 1 | 16,702,960 | 16,703,224 | 2  | 0 | 4  | yes | TE |
| at_locus.01640 | 1 | 16,712,459 | 16,712,512 | 13 | 0 | 0  | yes | TE |
| at_locus.01641 | 1 | 16,714,829 | 16,715,101 | 9  | 0 | 1  | yes | TE |
| at_locus.01642 | 1 | 16,726,166 | 16,726,255 | 1  | 0 | 5  | yes | TE |
| at_locus.01643 | 1 | 16,740,276 | 16,740,604 | 7  | 2 | 5  | yes | TE |
| at_locus.01644 | 1 | 16,740,847 | 16,740,924 | 39 | 0 | 2  | yes | TE |
| at_locus.01645 | 1 | 16,744,610 | 16,744,669 | 5  | 0 | 0  | yes |    |
| at_locus.01646 | 1 | 16,751,764 | 16,752,166 | 5  | 0 | 2  | no  | TE |
| at_locus.01647 | 1 | 16,760,409 | 16,761,048 | 41 | 1 | 29 | yes |    |
| at_locus.01648 | 1 | 16,772,736 | 16,773,153 | 20 | 0 | 2  | yes |    |
| at_locus.01649 | 1 | 16,793,729 | 16,794,154 | 28 | 0 | 2  | yes | TE |
| at_locus.01650 | 1 | 16,804,104 | 16,804,675 | 26 | 0 | 26 | yes |    |
| at_locus.01651 | 1 | 16,813,234 | 16,813,415 | 4  | 0 | 0  | yes |    |
| at_locus.01652 | 1 | 16,818,127 | 16,818,435 | 8  | 0 | 0  | yes | TE |
| at_locus.01653 | 1 | 16,820,967 | 16,821,412 | 12 | 0 | 0  | yes |    |
| at_locus.01654 | 1 | 16,821,858 | 16,822,114 | 8  | 0 | 0  | yes | TE |
| at_locus.01655 | 1 | 16,824,750 | 16,824,851 | 4  | 0 | 1  | no  |    |
| at_locus.01656 | 1 | 16,826,958 | 16,826,999 | 4  | 0 | 0  | no  | TE |
| at_locus.01657 | 1 | 16,827,590 | 16,828,153 | 35 | 4 | 0  | yes | TE |
| at_locus.01658 | 1 | 16,828,388 | 16,828,808 | 16 | 0 | 0  | no  | TE |
| at_locus.01659 | 1 | 16,861,074 | 16,861,591 | 7  | 0 | 0  | no  | TE |
| at_locus.01660 | 1 | 16,863,486 | 16,863,798 | 10 | 0 | 13 | yes |    |
| at_locus.01661 | 1 | 16,872,634 | 16,872,819 | 5  | 0 | 0  | yes | TE |
| at_locus.01662 | 1 | 16,882,419 | 16,882,816 | 7  | 0 | 4  | yes |    |
| at_locus.01663 | 1 | 16,886,373 | 16,886,915 | 74 | 0 | 50 | yes |    |
| at_locus.01664 | 1 | 16,887,382 | 16,888,027 | 42 | 0 | 30 | yes |    |
| at_locus.01665 | 1 | 16,888,234 | 16,888,507 | 4  | 0 | 14 | yes | TE |
| at_locus.01666 | 1 | 16,888,711 | 16,888,889 | 6  | 1 | 5  | yes | TE |
| at_locus.01667 | 1 | 16,901,931 | 16,902,121 | 4  | 0 | 0  | yes |    |
| at_locus.01668 | 1 | 16,905,376 | 16,905,420 | 4  | 0 | 0  | yes |    |
| at_locus.01669 | 1 | 16,906,157 | 16,906,282 | 10 | 0 | 0  | yes | TE |
| at_locus.01670 | 1 | 16,906,935 | 16,908,306 | 63 | 3 | 1  | yes | TE |
| at_locus.01671 | 1 | 16,940,435 | 16,940,542 | 8  | 0 | 0  | yes |    |
| at_locus.01672 | 1 | 16,945,873 | 16,946,145 | 2  | 0 | 7  | yes | TE |
| at_locus.01673 | 1 | 16,950,092 | 16,950,449 | 4  | 0 | 1  | no  | TE |
| at_locus.01674 | 1 | 16,953,420 | 16,953,574 | 5  | 0 | 2  | yes | TE |
| at_locus.01675 | 1 | 16,955,242 | 16,955,378 | 6  | 0 | 0  | yes | TE |

|                |   |            |            |    |   |    |     |    |
|----------------|---|------------|------------|----|---|----|-----|----|
| at_locus.01676 | 1 | 16,968,289 | 16,969,010 | 12 | 0 | 0  | yes | TE |
| at_locus.01677 | 1 | 16,970,091 | 16,970,212 | 7  | 0 | 1  | no  | TE |
| at_locus.01678 | 1 | 16,987,657 | 16,987,943 | 1  | 1 | 4  | yes |    |
| at_locus.01679 | 1 | 16,988,384 | 16,988,508 | 4  | 0 | 0  | yes | TE |
| at_locus.01680 | 1 | 16,990,023 | 16,990,309 | 21 | 0 | 5  | yes | TE |
| at_locus.01681 | 1 | 16,991,466 | 16,991,870 | 7  | 0 | 2  | yes | TE |
| at_locus.01682 | 1 | 17,000,358 | 17,000,908 | 39 | 2 | 0  | no  | TE |
| at_locus.01683 | 1 | 17,001,118 | 17,001,395 | 6  | 0 | 1  | no  | TE |
| at_locus.01684 | 1 | 17,009,415 | 17,009,769 | 8  | 0 | 0  | yes |    |
| at_locus.01685 | 1 | 17,022,623 | 17,022,818 | 4  | 0 | 0  | no  |    |
| at_locus.01686 | 1 | 17,037,963 | 17,038,036 | 5  | 0 | 0  | no  | TE |
| at_locus.01687 | 1 | 17,038,051 | 17,039,130 | 17 | 0 | 23 | no  | TE |
| at_locus.01688 | 1 | 17,040,158 | 17,040,208 | 4  | 0 | 0  | no  | TE |
| at_locus.01689 | 1 | 17,040,960 | 17,041,101 | 1  | 0 | 8  | no  | TE |
| at_locus.01690 | 1 | 17,041,716 | 17,041,982 | 5  | 0 | 0  | no  | TE |
| at_locus.01691 | 1 | 17,045,234 | 17,045,723 | 1  | 0 | 4  | no  | TE |
| at_locus.01692 | 1 | 17,049,958 | 17,050,305 | 2  | 0 | 3  | no  | TE |
| at_locus.01693 | 1 | 17,051,957 | 17,052,228 | 4  | 0 | 3  | no  | TE |
| at_locus.01694 | 1 | 17,073,844 | 17,073,987 | 17 | 1 | 1  | yes | TE |
| at_locus.01695 | 1 | 17,079,370 | 17,079,618 | 5  | 0 | 0  | yes | TE |
| at_locus.01696 | 1 | 17,096,983 | 17,097,634 | 0  | 0 | 2  | no  |    |
| at_locus.01697 | 1 | 17,104,669 | 17,104,754 | 4  | 1 | 0  | yes | TE |
| at_locus.01698 | 1 | 17,110,626 | 17,110,874 | 4  | 0 | 1  | no  | TE |
| at_locus.01699 | 1 | 17,112,607 | 17,112,757 | 4  | 0 | 0  | yes | TE |
| at_locus.01700 | 1 | 17,114,227 | 17,114,914 | 55 | 1 | 23 | yes |    |
| at_locus.01701 | 1 | 17,138,500 | 17,138,830 | 26 | 2 | 2  | yes |    |
| at_locus.01702 | 1 | 17,140,299 | 17,140,572 | 19 | 1 | 2  | no  |    |
| at_locus.01703 | 1 | 17,142,044 | 17,142,317 | 19 | 1 | 2  | no  |    |
| at_locus.01704 | 1 | 17,143,784 | 17,144,057 | 22 | 2 | 3  | no  |    |
| at_locus.01705 | 1 | 17,147,313 | 17,147,538 | 19 | 2 | 2  | no  |    |
| at_locus.01706 | 1 | 17,154,257 | 17,154,374 | 5  | 2 | 1  | yes | TE |
| at_locus.01707 | 1 | 17,190,320 | 17,190,703 | 11 | 0 | 7  | yes |    |
| at_locus.01708 | 1 | 17,196,763 | 17,196,919 | 0  | 0 | 4  | yes | TE |
| at_locus.01709 | 1 | 17,203,929 | 17,204,492 | 23 | 1 | 2  | yes | TE |
| at_locus.01710 | 1 | 17,206,149 | 17,206,258 | 0  | 0 | 7  | no  |    |
| at_locus.01711 | 1 | 17,216,278 | 17,216,926 | 5  | 0 | 17 | yes | TE |
| at_locus.01712 | 1 | 17,231,545 | 17,231,661 | 6  | 0 | 2  | yes | TE |

|                |   |            |            |    |   |    |     |    |
|----------------|---|------------|------------|----|---|----|-----|----|
| at_locus.01713 | 1 | 17,231,946 | 17,232,356 | 7  | 0 | 2  | yes |    |
| at_locus.01714 | 1 | 17,260,186 | 17,260,357 | 2  | 0 | 4  | yes |    |
| at_locus.01715 | 1 | 17,269,510 | 17,269,900 | 6  | 0 | 0  | yes | TE |
| at_locus.01716 | 1 | 17,284,436 | 17,284,624 | 4  | 0 | 1  | yes |    |
| at_locus.01717 | 1 | 17,284,837 | 17,284,909 | 2  | 0 | 0  | no  |    |
| at_locus.01718 | 1 | 17,291,707 | 17,291,916 | 8  | 0 | 0  | yes |    |
| at_locus.01719 | 1 | 17,302,358 | 17,302,420 | 12 | 0 | 0  | yes |    |
| at_locus.01720 | 1 | 17,302,685 | 17,302,747 | 4  | 1 | 0  | yes | TE |
| at_locus.01721 | 1 | 17,327,264 | 17,327,340 | 5  | 0 | 0  | yes |    |
| at_locus.01722 | 1 | 17,335,559 | 17,335,695 | 23 | 0 | 0  | yes | TE |
| at_locus.01723 | 1 | 17,337,797 | 17,338,080 | 7  | 0 | 0  | yes |    |
| at_locus.01724 | 1 | 17,372,033 | 17,372,218 | 10 | 0 | 2  | no  |    |
| at_locus.01725 | 1 | 17,384,275 | 17,384,556 | 8  | 0 | 1  | yes |    |
| at_locus.01726 | 1 | 17,408,107 | 17,408,290 | 12 | 0 | 1  | no  | TE |
| at_locus.01727 | 1 | 17,408,545 | 17,408,568 | 4  | 0 | 0  | no  | TE |
| at_locus.01728 | 1 | 17,433,600 | 17,433,726 | 6  | 0 | 1  | no  |    |
| at_locus.01729 | 1 | 17,444,141 | 17,444,176 | 8  | 0 | 0  | yes |    |
| at_locus.01730 | 1 | 17,451,952 | 17,452,310 | 5  | 1 | 2  | yes | TE |
| at_locus.01731 | 1 | 17,456,529 | 17,456,546 | 0  | 0 | 9  | yes |    |
| at_locus.01732 | 1 | 17,486,409 | 17,486,513 | 0  | 5 | 0  | yes |    |
| at_locus.01733 | 1 | 17,492,758 | 17,493,488 | 10 | 1 | 8  | yes | TE |
| at_locus.01734 | 1 | 17,504,698 | 17,504,739 | 7  | 0 | 0  | no  | TE |
| at_locus.01735 | 1 | 17,504,954 | 17,505,249 | 14 | 0 | 1  | yes | TE |
| at_locus.01736 | 1 | 17,513,718 | 17,513,742 | 8  | 0 | 1  | no  |    |
| at_locus.01737 | 1 | 17,515,396 | 17,515,644 | 7  | 0 | 1  | yes |    |
| at_locus.01738 | 1 | 17,517,478 | 17,517,857 | 6  | 0 | 3  | yes | TE |
| at_locus.01739 | 1 | 17,531,161 | 17,531,626 | 17 | 0 | 5  | no  |    |
| at_locus.01740 | 1 | 17,537,951 | 17,538,569 | 18 | 1 | 5  | no  |    |
| at_locus.01741 | 1 | 17,543,317 | 17,543,981 | 6  | 0 | 8  | yes |    |
| at_locus.01742 | 1 | 17,545,395 | 17,546,217 | 7  | 0 | 7  | yes |    |
| at_locus.01743 | 1 | 17,546,445 | 17,547,290 | 20 | 0 | 34 | yes | TE |
| at_locus.01744 | 1 | 17,548,612 | 17,549,463 | 12 | 1 | 8  | yes |    |
| at_locus.01745 | 1 | 17,549,691 | 17,550,396 | 18 | 0 | 25 | yes | TE |
| at_locus.01746 | 1 | 17,551,757 | 17,552,400 | 14 | 1 | 3  | yes |    |
| at_locus.01747 | 1 | 17,554,485 | 17,554,562 | 5  | 0 | 0  | no  | TE |
| at_locus.01748 | 1 | 17,555,208 | 17,555,438 | 17 | 0 | 0  | no  | TE |
| at_locus.01749 | 1 | 17,563,308 | 17,563,356 | 8  | 0 | 0  | yes |    |

|                |   |            |            |     |     |    |     |    |
|----------------|---|------------|------------|-----|-----|----|-----|----|
| at_locus.01750 | 1 | 17,563,631 | 17,563,652 | 0   | 5   | 1  | yes | TE |
| at_locus.01751 | 1 | 17,578,528 | 17,578,584 | 4   | 0   | 0  | yes |    |
| at_locus.01752 | 1 | 17,607,992 | 17,608,479 | 8   | 0   | 1  | yes | TE |
| at_locus.01753 | 1 | 17,614,203 | 17,614,329 | 5   | 0   | 0  | yes | TE |
| at_locus.01754 | 1 | 17,623,312 | 17,623,771 | 5   | 0   | 2  | yes |    |
| at_locus.01755 | 1 | 17,623,979 | 17,624,122 | 1   | 0   | 4  | no  | TE |
| at_locus.01756 | 1 | 17,641,741 | 17,641,806 | 4   | 0   | 0  | yes |    |
| at_locus.01757 | 1 | 17,643,531 | 17,645,657 | 389 | 6   | 67 | yes |    |
| at_locus.01758 | 1 | 17,663,440 | 17,663,864 | 17  | 1   | 2  | yes | TE |
| at_locus.01759 | 1 | 17,668,698 | 17,668,873 | 13  | 0   | 1  | yes | TE |
| at_locus.01760 | 1 | 17,669,747 | 17,669,916 | 6   | 0   | 0  | no  | TE |
| at_locus.01761 | 1 | 17,676,892 | 17,677,363 | 1   | 0   | 7  | yes |    |
| at_locus.01762 | 1 | 17,693,302 | 17,693,922 | 37  | 0   | 20 | yes | TE |
| at_locus.01763 | 1 | 17,694,201 | 17,694,245 | 4   | 0   | 3  | no  | TE |
| at_locus.01764 | 1 | 17,713,246 | 17,713,407 | 34  | 1   | 3  | no  | TE |
| at_locus.01765 | 1 | 17,714,356 | 17,714,432 | 16  | 0   | 0  | no  | TE |
| at_locus.01766 | 1 | 17,717,250 | 17,718,271 | 53  | 3   | 9  | no  | TE |
| at_locus.01767 | 1 | 17,730,849 | 17,730,957 | 4   | 0   | 0  | yes | TE |
| at_locus.01768 | 1 | 17,826,297 | 17,826,505 | 3   | 0   | 6  | yes |    |
| at_locus.01769 | 1 | 17,827,344 | 17,827,826 | 7   | 0   | 10 | yes |    |
| at_locus.01770 | 1 | 17,829,390 | 17,829,497 | 199 | 247 | 38 | yes |    |
| at_locus.01771 | 1 | 17,844,331 | 17,844,457 | 9   | 0   | 0  | yes |    |
| at_locus.01772 | 1 | 17,846,106 | 17,846,225 | 4   | 0   | 0  | no  | TE |
| at_locus.01773 | 1 | 17,848,411 | 17,848,875 | 7   | 0   | 4  | no  | TE |
| at_locus.01774 | 1 | 17,864,846 | 17,864,994 | 7   | 0   | 0  | yes | TE |
| at_locus.01775 | 1 | 17,877,749 | 17,877,846 | 9   | 0   | 0  | yes | TE |
| at_locus.01776 | 1 | 17,903,577 | 17,903,616 | 7   | 0   | 0  | no  | TE |
| at_locus.01777 | 1 | 17,904,239 | 17,905,491 | 33  | 1   | 0  | no  | TE |
| at_locus.01778 | 1 | 17,940,836 | 17,941,627 | 22  | 1   | 4  | yes | TE |
| at_locus.01779 | 1 | 18,005,853 | 18,006,355 | 8   | 0   | 4  | no  | TE |
| at_locus.01780 | 1 | 18,008,190 | 18,008,302 | 4   | 0   | 0  | yes | TE |
| at_locus.01781 | 1 | 18,008,912 | 18,008,993 | 0   | 0   | 4  | no  | TE |
| at_locus.01782 | 1 | 18,009,336 | 18,009,715 | 0   | 0   | 5  | yes | TE |
| at_locus.01783 | 1 | 18,010,512 | 18,010,928 | 6   | 0   | 5  | no  | TE |
| at_locus.01784 | 1 | 18,016,902 | 18,017,232 | 54  | 0   | 1  | no  | TE |
| at_locus.01785 | 1 | 18,017,997 | 18,018,042 | 0   | 0   | 6  | no  | TE |
| at_locus.01786 | 1 | 18,018,970 | 18,019,238 | 5   | 0   | 1  | no  | TE |



|                |   |            |            |     |     |    |     |    |
|----------------|---|------------|------------|-----|-----|----|-----|----|
| at_locus.01787 | 1 | 18,019,720 | 18,019,863 | 2   | 0   | 4  | no  | TE |
| at_locus.01788 | 1 | 18,021,079 | 18,021,748 | 57  | 0   | 2  | no  | TE |
| at_locus.01789 | 1 | 18,023,358 | 18,023,499 | 21  | 0   | 0  | yes |    |
| at_locus.01790 | 1 | 18,023,911 | 18,024,410 | 6   | 1   | 13 | yes |    |
| at_locus.01791 | 1 | 18,030,656 | 18,030,677 | 74  | 175 | 6  | yes |    |
| at_locus.01792 | 1 | 18,051,807 | 18,051,849 | 4   | 0   | 0  | yes |    |
| at_locus.01793 | 1 | 18,059,502 | 18,059,657 | 4   | 0   | 0  | yes |    |
| at_locus.01794 | 1 | 18,092,347 | 18,093,133 | 29  | 2   | 0  | yes |    |
| at_locus.01795 | 1 | 18,097,185 | 18,097,563 | 22  | 0   | 7  | yes |    |
| at_locus.01796 | 1 | 18,098,264 | 18,098,888 | 67  | 0   | 47 | yes |    |
| at_locus.01797 | 1 | 18,099,338 | 18,099,797 | 176 | 11  | 27 | yes |    |
| at_locus.01798 | 1 | 18,100,033 | 18,100,270 | 4   | 0   | 0  | yes | TE |
| at_locus.01799 | 1 | 18,114,475 | 18,114,993 | 22  | 0   | 3  | yes |    |
| at_locus.01800 | 1 | 18,135,597 | 18,135,634 | 4   | 0   | 0  | yes |    |
| at_locus.01801 | 1 | 18,139,639 | 18,139,748 | 4   | 0   | 0  | yes |    |
| at_locus.01802 | 1 | 18,159,242 | 18,160,114 | 6   | 0   | 2  | no  | TE |
| at_locus.01803 | 1 | 18,161,774 | 18,161,809 | 4   | 0   | 0  | no  | TE |
| at_locus.01804 | 1 | 18,163,040 | 18,163,357 | 2   | 0   | 4  | yes | TE |
| at_locus.01805 | 1 | 18,163,623 | 18,163,734 | 5   | 0   | 0  | yes | TE |
| at_locus.01806 | 1 | 18,166,746 | 18,167,088 | 1   | 0   | 4  | no  | TE |
| at_locus.01807 | 1 | 18,168,063 | 18,168,519 | 11  | 0   | 0  | yes | TE |
| at_locus.01808 | 1 | 18,169,130 | 18,169,470 | 13  | 0   | 0  | yes |    |
| at_locus.01809 | 1 | 18,196,118 | 18,196,328 | 4   | 0   | 3  | no  |    |
| at_locus.01810 | 1 | 18,215,266 | 18,215,367 | 6   | 0   | 0  | yes |    |
| at_locus.01811 | 1 | 18,222,309 | 18,222,344 | 4   | 0   | 1  | no  |    |
| at_locus.01812 | 1 | 18,228,799 | 18,229,193 | 19  | 0   | 0  | yes |    |
| at_locus.01813 | 1 | 18,229,644 | 18,230,413 | 269 | 4   | 2  | yes |    |
| at_locus.01814 | 1 | 18,285,755 | 18,286,276 | 20  | 1   | 10 | yes |    |
| at_locus.01815 | 1 | 18,301,200 | 18,301,279 | 12  | 0   | 1  | no  | TE |
| at_locus.01816 | 1 | 18,303,940 | 18,304,087 | 10  | 0   | 0  | no  | TE |
| at_locus.01817 | 1 | 18,304,781 | 18,304,808 | 4   | 0   | 0  | no  | TE |
| at_locus.01818 | 1 | 18,305,513 | 18,305,984 | 7   | 0   | 3  | no  | TE |
| at_locus.01819 | 1 | 18,324,320 | 18,324,932 | 34  | 0   | 1  | yes | TE |
| at_locus.01820 | 1 | 18,328,789 | 18,328,926 | 4   | 0   | 0  | yes |    |
| at_locus.01821 | 1 | 18,383,991 | 18,384,211 | 5   | 0   | 1  | no  |    |
| at_locus.01822 | 1 | 18,390,091 | 18,391,116 | 27  | 0   | 8  | yes | TE |
| at_locus.01823 | 1 | 18,460,902 | 18,460,981 | 5   | 0   | 0  | yes | TE |

|                |   |            |            |     |     |     |     |    |
|----------------|---|------------|------------|-----|-----|-----|-----|----|
| at_locus.01824 | 1 | 18,523,192 | 18,523,400 | 0   | 6   | 1   | yes |    |
| at_locus.01825 | 1 | 18,551,799 | 18,552,010 | 18  | 2   | 1   | no  |    |
| at_locus.01826 | 1 | 18,552,983 | 18,553,570 | 156 | 584 | 157 | yes |    |
| at_locus.01827 | 1 | 18,556,972 | 18,557,032 | 4   | 0   | 0   | no  |    |
| at_locus.01828 | 1 | 18,583,943 | 18,584,118 | 1   | 0   | 9   | yes |    |
| at_locus.01829 | 1 | 18,584,699 | 18,585,196 | 5   | 0   | 4   | yes |    |
| at_locus.01830 | 1 | 18,603,468 | 18,604,158 | 8   | 0   | 2   | yes | TE |
| at_locus.01831 | 1 | 18,635,943 | 18,636,591 | 20  | 0   | 1   | yes | TE |
| at_locus.01832 | 1 | 18,637,182 | 18,637,223 | 7   | 0   | 1   | no  | TE |
| at_locus.01833 | 1 | 18,648,387 | 18,648,421 | 5   | 0   | 17  | no  |    |
| at_locus.01834 | 1 | 18,748,873 | 18,749,098 | 7   | 0   | 0   | no  | TE |
| at_locus.01835 | 1 | 18,749,731 | 18,749,978 | 38  | 0   | 1   | yes | TE |
| at_locus.01836 | 1 | 18,750,631 | 18,750,708 | 10  | 0   | 0   | no  | TE |
| at_locus.01837 | 1 | 18,770,206 | 18,770,284 | 10  | 0   | 0   | yes | TE |
| at_locus.01838 | 1 | 18,793,771 | 18,793,808 | 8   | 0   | 0   | no  | TE |
| at_locus.01839 | 1 | 18,794,262 | 18,794,680 | 28  | 0   | 0   | yes | TE |
| at_locus.01840 | 1 | 18,795,171 | 18,795,855 | 30  | 0   | 1   | no  | TE |
| at_locus.01841 | 1 | 18,796,233 | 18,796,530 | 18  | 0   | 0   | no  | TE |
| at_locus.01842 | 1 | 18,808,752 | 18,808,780 | 4   | 0   | 0   | no  | TE |
| at_locus.01843 | 1 | 18,810,589 | 18,810,629 | 4   | 0   | 0   | yes |    |
| at_locus.01844 | 1 | 18,851,672 | 18,851,966 | 5   | 0   | 4   | no  | TE |
| at_locus.01845 | 1 | 18,856,367 | 18,856,803 | 7   | 0   | 2   | no  | TE |
| at_locus.01846 | 1 | 18,863,038 | 18,863,183 | 5   | 0   | 2   | yes |    |
| at_locus.01847 | 1 | 18,898,206 | 18,899,010 | 26  | 0   | 10  | yes | TE |
| at_locus.01848 | 1 | 18,909,867 | 18,910,239 | 104 | 3   | 8   | yes |    |
| at_locus.01849 | 1 | 18,934,712 | 18,935,002 | 7   | 0   | 0   | yes | TE |
| at_locus.01850 | 1 | 18,970,351 | 18,970,665 | 1   | 0   | 4   | yes | TE |
| at_locus.01851 | 1 | 18,973,379 | 18,973,755 | 1   | 0   | 6   | yes | TE |
| at_locus.01852 | 1 | 18,984,313 | 18,984,525 | 4   | 0   | 0   | yes | TE |
| at_locus.01853 | 1 | 18,984,971 | 18,984,995 | 16  | 0   | 1   | yes | TE |
| at_locus.01854 | 1 | 18,985,290 | 18,985,650 | 4   | 0   | 3   | yes |    |
| at_locus.01855 | 1 | 19,027,375 | 19,027,819 | 13  | 0   | 12  | yes |    |
| at_locus.01856 | 1 | 19,028,081 | 19,028,107 | 5   | 0   | 3   | yes |    |
| at_locus.01857 | 1 | 19,030,560 | 19,030,921 | 50  | 1   | 2   | no  | TE |
| at_locus.01858 | 1 | 19,031,171 | 19,031,522 | 20  | 0   | 1   | no  | TE |
| at_locus.01859 | 1 | 19,065,633 | 19,065,718 | 16  | 0   | 0   | no  | TE |
| at_locus.01860 | 1 | 19,066,398 | 19,066,563 | 7   | 0   | 0   | no  | TE |

|                |   |            |            |    |   |    |     |    |
|----------------|---|------------|------------|----|---|----|-----|----|
| at_locus.01861 | 1 | 19,067,020 | 19,067,585 | 37 | 0 | 1  | no  | TE |
| at_locus.01862 | 1 | 19,076,743 | 19,077,164 | 14 | 1 | 16 | yes | TE |
| at_locus.01863 | 1 | 19,088,767 | 19,088,983 | 17 | 0 | 0  | no  | TE |
| at_locus.01864 | 1 | 19,089,999 | 19,090,285 | 24 | 0 | 1  | yes | TE |
| at_locus.01865 | 1 | 19,175,954 | 19,176,230 | 22 | 0 | 0  | no  | TE |
| at_locus.01866 | 1 | 19,177,391 | 19,177,470 | 11 | 0 | 0  | no  | TE |
| at_locus.01867 | 1 | 19,184,011 | 19,184,048 | 11 | 0 | 0  | yes |    |
| at_locus.01868 | 1 | 19,223,702 | 19,223,737 | 4  | 0 | 0  | yes | TE |
| at_locus.01869 | 1 | 19,230,030 | 19,230,151 | 8  | 0 | 0  | yes |    |
| at_locus.01870 | 1 | 19,251,660 | 19,251,930 | 21 | 0 | 3  | no  | TE |
| at_locus.01871 | 1 | 19,252,268 | 19,252,777 | 49 | 0 | 3  | no  | TE |
| at_locus.01872 | 1 | 19,307,481 | 19,307,748 | 7  | 2 | 1  | yes |    |
| at_locus.01873 | 1 | 19,331,024 | 19,331,153 | 26 | 1 | 0  | no  | TE |
| at_locus.01874 | 1 | 19,331,886 | 19,332,228 | 9  | 2 | 0  | no  | TE |
| at_locus.01875 | 1 | 19,332,887 | 19,332,917 | 7  | 0 | 0  | no  | TE |
| at_locus.01876 | 1 | 19,339,984 | 19,340,376 | 25 | 1 | 1  | yes | TE |
| at_locus.01877 | 1 | 19,340,531 | 19,340,983 | 4  | 0 | 14 | no  | TE |
| at_locus.01878 | 1 | 19,341,173 | 19,341,505 | 9  | 0 | 9  | no  | TE |
| at_locus.01879 | 1 | 19,341,904 | 19,342,453 | 4  | 0 | 11 | no  | TE |
| at_locus.01880 | 1 | 19,342,677 | 19,343,038 | 4  | 0 | 9  | no  | TE |
| at_locus.01881 | 1 | 19,343,214 | 19,343,515 | 4  | 0 | 1  | yes | TE |
| at_locus.01882 | 1 | 19,343,902 | 19,344,305 | 1  | 0 | 5  | no  | TE |
| at_locus.01883 | 1 | 19,344,694 | 19,345,259 | 9  | 0 | 8  | no  | TE |
| at_locus.01884 | 1 | 19,347,059 | 19,347,171 | 1  | 0 | 4  | no  | TE |
| at_locus.01885 | 1 | 19,347,511 | 19,348,192 | 10 | 0 | 6  | no  | TE |
| at_locus.01886 | 1 | 19,348,240 | 19,349,017 | 15 | 0 | 25 | yes | TE |
| at_locus.01887 | 1 | 19,349,081 | 19,349,153 | 4  | 0 | 0  | no  | TE |
| at_locus.01888 | 1 | 19,356,553 | 19,356,634 | 10 | 0 | 0  | yes | TE |
| at_locus.01889 | 1 | 19,356,996 | 19,357,104 | 5  | 0 | 0  | yes | TE |
| at_locus.01890 | 1 | 19,379,476 | 19,379,938 | 0  | 0 | 4  | no  | TE |
| at_locus.01891 | 1 | 19,384,039 | 19,384,416 | 9  | 0 | 5  | no  | TE |
| at_locus.01892 | 1 | 19,393,309 | 19,393,435 | 7  | 0 | 0  | yes | TE |
| at_locus.01893 | 1 | 19,402,223 | 19,402,250 | 4  | 0 | 0  | yes |    |
| at_locus.01894 | 1 | 19,406,982 | 19,407,131 | 5  | 0 | 0  | no  | TE |
| at_locus.01895 | 1 | 19,407,784 | 19,408,040 | 5  | 0 | 1  | no  |    |
| at_locus.01896 | 1 | 19,428,537 | 19,428,624 | 8  | 0 | 0  | yes |    |
| at_locus.01897 | 1 | 19,432,656 | 19,432,692 | 4  | 0 | 0  | yes |    |

|                |   |            |            |     |    |     |     |    |
|----------------|---|------------|------------|-----|----|-----|-----|----|
| at_locus.01898 | 1 | 19,433,951 | 19,434,123 | 5   | 0  | 0   | yes |    |
| at_locus.01899 | 1 | 19,468,755 | 19,469,566 | 27  | 0  | 1   | no  | TE |
| at_locus.01900 | 1 | 19,469,782 | 19,469,908 | 6   | 2  | 0   | no  | TE |
| at_locus.01901 | 1 | 19,470,533 | 19,470,618 | 7   | 0  | 0   | no  | TE |
| at_locus.01903 | 1 | 19,580,032 | 19,580,310 | 12  | 0  | 2   | yes |    |
| at_locus.01904 | 1 | 19,580,714 | 19,581,878 | 128 | 5  | 148 | yes |    |
| at_locus.01905 | 1 | 19,598,230 | 19,598,255 | 4   | 0  | 0   | no  | TE |
| at_locus.01906 | 1 | 19,669,616 | 19,669,700 | 21  | 0  | 1   | no  | TE |
| at_locus.01907 | 1 | 19,670,151 | 19,670,338 | 7   | 0  | 0   | yes | TE |
| at_locus.01908 | 1 | 19,721,604 | 19,721,870 | 4   | 0  | 1   | no  | TE |
| at_locus.01909 | 1 | 19,732,308 | 19,732,980 | 26  | 0  | 9   | no  | TE |
| at_locus.01910 | 1 | 19,745,215 | 19,745,804 | 16  | 0  | 0   | yes | TE |
| at_locus.01911 | 1 | 19,747,918 | 19,747,950 | 5   | 0  | 0   | yes |    |
| at_locus.01912 | 1 | 19,771,660 | 19,773,482 | 67  | 4  | 0   | no  | TE |
| at_locus.01913 | 1 | 19,783,998 | 19,784,660 | 15  | 0  | 2   | yes | TE |
| at_locus.01914 | 1 | 19,813,537 | 19,813,575 | 4   | 0  | 0   | yes | TE |
| at_locus.01915 | 1 | 19,947,372 | 19,948,304 | 16  | 0  | 12  | yes | TE |
| at_locus.01916 | 1 | 19,997,470 | 19,997,782 | 28  | 1  | 0   | no  | TE |
| at_locus.01917 | 1 | 19,998,017 | 19,998,639 | 17  | 0  | 1   | yes | TE |
| at_locus.01918 | 1 | 19,999,317 | 19,999,402 | 16  | 0  | 0   | no  | TE |
| at_locus.01919 | 1 | 20,027,999 | 20,028,164 | 6   | 0  | 0   | yes |    |
| at_locus.01920 | 1 | 20,036,917 | 20,037,366 | 10  | 0  | 0   | yes | TE |
| at_locus.01921 | 1 | 20,043,223 | 20,043,245 | 21  | 19 | 24  | no  |    |
| at_locus.01922 | 1 | 20,045,253 | 20,045,275 | 21  | 19 | 24  | no  |    |
| at_locus.01923 | 1 | 20,116,393 | 20,116,543 | 4   | 0  | 0   | no  |    |
| at_locus.01924 | 1 | 20,116,937 | 20,117,051 | 4   | 0  | 0   | no  |    |
| at_locus.01925 | 1 | 20,128,958 | 20,129,108 | 4   | 0  | 0   | no  |    |
| at_locus.01926 | 1 | 20,129,502 | 20,129,616 | 4   | 0  | 0   | no  |    |
| at_locus.01927 | 1 | 20,171,134 | 20,171,222 | 6   | 0  | 0   | no  | TE |
| at_locus.01928 | 1 | 20,191,215 | 20,191,675 | 11  | 0  | 7   | yes |    |
| at_locus.01929 | 1 | 20,210,369 | 20,210,523 | 20  | 1  | 0   | yes |    |
| at_locus.01930 | 1 | 20,211,845 | 20,211,935 | 4   | 0  | 0   | no  |    |
| at_locus.01931 | 1 | 20,316,799 | 20,317,038 | 0   | 0  | 4   | yes |    |
| at_locus.01932 | 1 | 20,317,866 | 20,318,195 | 2   | 0  | 4   | no  | TE |
| at_locus.01933 | 1 | 20,323,306 | 20,324,202 | 13  | 0  | 9   | yes | TE |
| at_locus.01934 | 1 | 20,333,808 | 20,334,031 | 5   | 0  | 0   | no  | TE |
| at_locus.01935 | 1 | 20,366,578 | 20,366,779 | 7   | 0  | 0   | yes |    |

|                |   |            |            |    |   |    |     |    |
|----------------|---|------------|------------|----|---|----|-----|----|
| at_locus.01936 | 1 | 20,371,062 | 20,371,150 | 7  | 1 | 0  | yes | TE |
| at_locus.01937 | 1 | 20,401,299 | 20,401,803 | 2  | 0 | 15 | yes |    |
| at_locus.01938 | 1 | 20,402,434 | 20,402,607 | 0  | 0 | 6  | yes |    |
| at_locus.01939 | 1 | 20,407,195 | 20,407,232 | 6  | 0 | 0  | yes |    |
| at_locus.01940 | 1 | 20,415,977 | 20,416,086 | 17 | 0 | 0  | yes |    |
| at_locus.01942 | 1 | 20,436,684 | 20,436,916 | 9  | 0 | 0  | yes | TE |
| at_locus.01943 | 1 | 20,466,254 | 20,466,392 | 12 | 0 | 0  | yes |    |
| at_locus.01944 | 1 | 20,470,163 | 20,470,617 | 5  | 2 | 2  | yes |    |
| at_locus.01945 | 1 | 20,471,261 | 20,471,650 | 0  | 0 | 5  | yes |    |
| at_locus.01946 | 1 | 20,471,817 | 20,471,958 | 9  | 0 | 0  | yes |    |
| at_locus.01947 | 1 | 20,473,207 | 20,473,365 | 4  | 0 | 1  | yes |    |
| at_locus.01948 | 1 | 20,473,626 | 20,473,821 | 22 | 0 | 15 | yes | TE |
| at_locus.01949 | 1 | 20,480,437 | 20,481,343 | 15 | 0 | 17 | no  | TE |
| at_locus.01950 | 1 | 20,492,666 | 20,493,385 | 11 | 0 | 11 | no  | TE |
| at_locus.01951 | 1 | 20,496,224 | 20,496,473 | 5  | 0 | 0  | yes | TE |
| at_locus.01952 | 1 | 20,517,346 | 20,517,375 | 4  | 0 | 0  | no  | TE |
| at_locus.01953 | 1 | 20,518,023 | 20,518,242 | 4  | 0 | 0  | no  | TE |
| at_locus.01954 | 1 | 20,524,050 | 20,524,301 | 4  | 0 | 0  | yes | TE |
| at_locus.01955 | 1 | 20,528,988 | 20,529,215 | 6  | 0 | 1  | yes |    |
| at_locus.01956 | 1 | 20,563,366 | 20,563,482 | 14 | 0 | 0  | no  | TE |
| at_locus.01957 | 1 | 20,626,045 | 20,626,466 | 5  | 0 | 0  | yes | TE |
| at_locus.01958 | 1 | 20,628,709 | 20,628,785 | 5  | 0 | 0  | yes |    |
| at_locus.01959 | 1 | 20,687,027 | 20,687,255 | 17 | 0 | 1  | no  | TE |
| at_locus.01960 | 1 | 20,687,566 | 20,688,476 | 16 | 1 | 17 | yes | TE |
| at_locus.01961 | 1 | 20,703,467 | 20,703,721 | 7  | 0 | 0  | yes |    |
| at_locus.01962 | 1 | 20,707,887 | 20,708,211 | 7  | 0 | 1  | yes | TE |
| at_locus.01963 | 1 | 20,737,798 | 20,737,913 | 9  | 0 | 0  | yes |    |
| at_locus.01964 | 1 | 20,918,612 | 20,918,838 | 5  | 0 | 0  | yes |    |
| at_locus.01965 | 1 | 20,929,891 | 20,930,134 | 2  | 0 | 9  | yes |    |
| at_locus.01966 | 1 | 20,930,832 | 20,931,104 | 5  | 1 | 3  | yes |    |
| at_locus.01967 | 1 | 20,972,195 | 20,972,318 | 0  | 4 | 0  | yes |    |
| at_locus.01968 | 1 | 20,976,174 | 20,976,326 | 8  | 0 | 1  | no  | TE |
| at_locus.01969 | 1 | 20,976,772 | 20,977,208 | 16 | 0 | 5  | no  | TE |
| at_locus.01970 | 1 | 20,977,413 | 20,977,746 | 11 | 0 | 0  | yes | TE |
| at_locus.01971 | 1 | 20,983,107 | 20,984,597 | 82 | 0 | 29 | yes | TE |
| at_locus.01972 | 1 | 21,038,229 | 21,038,454 | 8  | 0 | 2  | yes |    |
| at_locus.01973 | 1 | 21,038,754 | 21,038,793 | 4  | 0 | 0  | yes |    |

|                |   |            |            |    |   |    |     |    |
|----------------|---|------------|------------|----|---|----|-----|----|
| at_locus.01974 | 1 | 21,070,243 | 21,070,581 | 8  | 0 | 10 | yes |    |
| at_locus.01975 | 1 | 21,085,292 | 21,085,613 | 4  | 0 | 9  | yes |    |
| at_locus.01976 | 1 | 21,128,373 | 21,128,531 | 4  | 0 | 0  | yes |    |
| at_locus.01977 | 1 | 21,128,666 | 21,129,039 | 2  | 0 | 4  | yes |    |
| at_locus.01978 | 1 | 21,132,322 | 21,132,528 | 9  | 0 | 0  | yes | TE |
| at_locus.01979 | 1 | 21,135,552 | 21,135,628 | 5  | 1 | 0  | no  | TE |
| at_locus.01980 | 1 | 21,213,916 | 21,214,336 | 12 | 0 | 1  | no  | TE |
| at_locus.01981 | 1 | 21,214,460 | 21,214,938 | 60 | 2 | 7  | no  | TE |
| at_locus.01982 | 1 | 21,219,592 | 21,220,245 | 8  | 0 | 11 | yes |    |
| at_locus.01983 | 1 | 21,227,586 | 21,227,634 | 9  | 0 | 0  | yes |    |
| at_locus.01984 | 1 | 21,250,094 | 21,250,373 | 2  | 0 | 4  | no  | TE |
| at_locus.01985 | 1 | 21,251,360 | 21,251,673 | 0  | 0 | 5  | no  | TE |
| at_locus.01986 | 1 | 21,263,821 | 21,263,901 | 13 | 0 | 1  | no  | TE |
| at_locus.01987 | 1 | 21,267,153 | 21,267,172 | 0  | 5 | 0  | yes |    |
| at_locus.02020 | 1 | 21,338,870 | 21,339,057 | 8  | 0 | 1  | yes |    |
| at_locus.02021 | 1 | 21,339,466 | 21,340,094 | 25 | 0 | 0  | yes | TE |
| at_locus.02022 | 1 | 21,345,197 | 21,345,372 | 4  | 0 | 0  | no  | TE |
| at_locus.02023 | 1 | 21,346,017 | 21,346,094 | 4  | 0 | 0  | no  | TE |
| at_locus.02024 | 1 | 21,349,877 | 21,350,126 | 5  | 0 | 0  | no  | TE |
| at_locus.02025 | 1 | 21,351,125 | 21,351,630 | 2  | 0 | 5  | no  | TE |
| at_locus.02026 | 1 | 21,352,985 | 21,353,154 | 5  | 0 | 0  | no  | TE |
| at_locus.02027 | 1 | 21,354,314 | 21,354,843 | 9  | 0 | 2  | yes | TE |
| at_locus.02028 | 1 | 21,383,623 | 21,383,656 | 0  | 4 | 0  | yes |    |
| at_locus.02029 | 1 | 21,393,761 | 21,394,070 | 24 | 2 | 1  | yes |    |
| at_locus.02030 | 1 | 21,396,269 | 21,396,542 | 9  | 0 | 0  | yes | TE |
| at_locus.02031 | 1 | 21,403,416 | 21,403,661 | 15 | 1 | 0  | no  |    |
| at_locus.02032 | 1 | 21,405,058 | 21,405,309 | 21 | 2 | 1  | yes |    |
| at_locus.02033 | 1 | 21,422,265 | 21,422,319 | 8  | 0 | 0  | yes |    |
| at_locus.02034 | 1 | 21,432,015 | 21,432,159 | 9  | 0 | 0  | yes | TE |
| at_locus.02035 | 1 | 21,453,890 | 21,454,135 | 6  | 0 | 5  | no  | TE |
| at_locus.02036 | 1 | 21,474,053 | 21,474,132 | 10 | 1 | 0  | yes |    |
| at_locus.02037 | 1 | 21,475,175 | 21,475,531 | 4  | 0 | 0  | yes | TE |
| at_locus.02038 | 1 | 21,480,805 | 21,481,054 | 7  | 0 | 5  | yes |    |
| at_locus.02039 | 1 | 21,511,482 | 21,511,716 | 20 | 0 | 0  | yes |    |
| at_locus.02040 | 1 | 21,513,355 | 21,513,507 | 1  | 0 | 4  | yes | TE |
| at_locus.02041 | 1 | 21,528,697 | 21,529,366 | 39 | 0 | 2  | yes | TE |
| at_locus.02042 | 1 | 21,531,111 | 21,531,478 | 6  | 0 | 1  | no  | TE |

|                |   |            |            |    |    |    |     |    |
|----------------|---|------------|------------|----|----|----|-----|----|
| at_locus.02043 | 1 | 21,532,307 | 21,532,352 | 0  | 0  | 6  | no  | TE |
| at_locus.02044 | 1 | 21,532,378 | 21,532,867 | 4  | 0  | 2  | no  | TE |
| at_locus.02045 | 1 | 21,533,117 | 21,533,442 | 17 | 0  | 1  | yes | TE |
| at_locus.02046 | 1 | 21,586,604 | 21,586,868 | 4  | 0  | 0  | yes | TE |
| at_locus.02047 | 1 | 21,613,012 | 21,613,588 | 10 | 0  | 1  | yes |    |
| at_locus.02048 | 1 | 21,618,964 | 21,619,174 | 9  | 0  | 0  | no  | TE |
| at_locus.02049 | 1 | 21,619,728 | 21,619,816 | 7  | 0  | 0  | yes | TE |
| at_locus.02050 | 1 | 21,632,461 | 21,632,510 | 4  | 0  | 0  | no  | TE |
| at_locus.02051 | 1 | 21,641,727 | 21,641,801 | 6  | 1  | 0  | yes |    |
| at_locus.02052 | 1 | 21,644,181 | 21,644,428 | 9  | 0  | 0  | yes |    |
| at_locus.02053 | 1 | 21,685,131 | 21,685,783 | 10 | 2  | 5  | yes | TE |
| at_locus.02054 | 1 | 21,685,971 | 21,686,141 | 14 | 0  | 0  | no  | TE |
| at_locus.02055 | 1 | 21,692,848 | 21,693,041 | 0  | 10 | 0  | no  |    |
| at_locus.02056 | 1 | 21,714,171 | 21,714,214 | 11 | 0  | 0  | yes |    |
| at_locus.02057 | 1 | 21,742,724 | 21,742,879 | 10 | 0  | 0  | yes | TE |
| at_locus.02058 | 1 | 21,744,259 | 21,744,652 | 12 | 1  | 5  | yes |    |
| at_locus.02059 | 1 | 21,745,300 | 21,745,596 | 4  | 0  | 5  | yes | TE |
| at_locus.02060 | 1 | 21,759,272 | 21,759,421 | 1  | 0  | 4  | yes |    |
| at_locus.02061 | 1 | 21,770,058 | 21,770,317 | 7  | 1  | 2  | yes |    |
| at_locus.02062 | 1 | 21,774,621 | 21,774,814 | 0  | 10 | 0  | no  |    |
| at_locus.02063 | 1 | 21,775,638 | 21,775,793 | 8  | 0  | 0  | no  |    |
| at_locus.02064 | 1 | 21,780,913 | 21,782,000 | 11 | 1  | 16 | no  | TE |
| at_locus.02065 | 1 | 21,782,918 | 21,783,028 | 9  | 0  | 3  | no  |    |
| at_locus.02066 | 1 | 21,788,579 | 21,788,838 | 7  | 1  | 2  | no  |    |
| at_locus.02067 | 1 | 21,790,579 | 21,790,768 | 12 | 0  | 0  | no  | TE |
| at_locus.02068 | 1 | 21,792,483 | 21,793,570 | 11 | 1  | 16 | no  | TE |
| at_locus.02069 | 1 | 21,794,486 | 21,794,596 | 9  | 0  | 3  | no  |    |
| at_locus.02070 | 1 | 21,798,779 | 21,798,933 | 0  | 3  | 0  | no  |    |
| at_locus.02071 | 1 | 21,806,456 | 21,806,575 | 7  | 1  | 0  | no  |    |
| at_locus.02072 | 1 | 21,810,879 | 21,811,072 | 0  | 10 | 0  | no  |    |
| at_locus.02073 | 1 | 21,811,896 | 21,812,051 | 8  | 0  | 0  | no  |    |
| at_locus.02074 | 1 | 21,817,171 | 21,818,258 | 11 | 1  | 16 | no  | TE |
| at_locus.02075 | 1 | 21,819,176 | 21,819,286 | 9  | 0  | 3  | no  |    |
| at_locus.02076 | 1 | 21,824,837 | 21,825,096 | 7  | 1  | 2  | no  |    |
| at_locus.02077 | 1 | 21,826,837 | 21,827,026 | 12 | 0  | 0  | no  | TE |
| at_locus.02078 | 1 | 21,828,741 | 21,829,828 | 11 | 1  | 16 | no  | TE |
| at_locus.02079 | 1 | 21,830,744 | 21,830,854 | 9  | 0  | 3  | no  |    |

|                |   |            |            |    |    |    |     |    |
|----------------|---|------------|------------|----|----|----|-----|----|
| at_locus.02080 | 1 | 21,835,037 | 21,835,191 | 0  | 3  | 0  | no  |    |
| at_locus.02081 | 1 | 21,842,714 | 21,842,833 | 7  | 1  | 0  | no  |    |
| at_locus.02082 | 1 | 21,847,137 | 21,847,330 | 0  | 10 | 0  | no  |    |
| at_locus.02083 | 1 | 21,848,154 | 21,848,309 | 8  | 0  | 0  | no  |    |
| at_locus.02084 | 1 | 21,857,358 | 21,857,485 | 26 | 3  | 0  | yes | TE |
| at_locus.02085 | 1 | 21,922,101 | 21,922,551 | 37 | 1  | 0  | no  | TE |
| at_locus.02086 | 1 | 21,950,811 | 21,950,950 | 5  | 0  | 0  | yes | TE |
| at_locus.02087 | 1 | 21,994,856 | 21,995,080 | 6  | 0  | 3  | no  | TE |
| at_locus.02088 | 1 | 21,996,382 | 21,996,644 | 4  | 0  | 0  | yes | TE |
| at_locus.02089 | 1 | 21,999,802 | 21,999,826 | 4  | 0  | 0  | yes | TE |
| at_locus.02090 | 1 | 22,028,712 | 22,028,757 | 13 | 0  | 2  | yes |    |
| at_locus.02091 | 1 | 22,046,432 | 22,046,655 | 8  | 1  | 1  | yes |    |
| at_locus.02092 | 1 | 22,060,214 | 22,060,239 | 1  | 4  | 0  | no  |    |
| at_locus.02093 | 1 | 22,063,175 | 22,063,551 | 4  | 0  | 5  | no  |    |
| at_locus.02094 | 1 | 22,064,344 | 22,064,381 | 4  | 0  | 0  | yes | TE |
| at_locus.02095 | 1 | 22,064,809 | 22,065,210 | 5  | 0  | 6  | yes |    |
| at_locus.02096 | 1 | 22,071,342 | 22,071,401 | 5  | 0  | 0  | yes |    |
| at_locus.02097 | 1 | 22,088,633 | 22,088,998 | 11 | 0  | 1  | yes |    |
| at_locus.02098 | 1 | 22,092,781 | 22,092,908 | 10 | 0  | 0  | yes |    |
| at_locus.02099 | 1 | 22,109,025 | 22,109,160 | 27 | 0  | 0  | no  | TE |
| at_locus.02100 | 1 | 22,109,520 | 22,110,286 | 12 | 1  | 5  | no  | TE |
| at_locus.02101 | 1 | 22,115,809 | 22,115,906 | 7  | 0  | 2  | no  | TE |
| at_locus.02102 | 1 | 22,116,229 | 22,116,371 | 14 | 0  | 0  | no  | TE |
| at_locus.02103 | 1 | 22,166,142 | 22,166,232 | 4  | 0  | 0  | yes | TE |
| at_locus.02104 | 1 | 22,166,907 | 22,169,567 | 34 | 0  | 44 | yes | TE |
| at_locus.02105 | 1 | 22,170,060 | 22,170,950 | 4  | 0  | 13 | yes | TE |
| at_locus.02106 | 1 | 22,171,200 | 22,171,559 | 5  | 0  | 0  | yes | TE |
| at_locus.02107 | 1 | 22,195,711 | 22,195,745 | 4  | 0  | 0  | no  | TE |
| at_locus.02108 | 1 | 22,196,078 | 22,196,116 | 13 | 0  | 0  | no  | TE |
| at_locus.02109 | 1 | 22,228,339 | 22,228,490 | 12 | 1  | 0  | yes |    |
| at_locus.02110 | 1 | 22,257,945 | 22,258,239 | 7  | 0  | 0  | yes |    |
| at_locus.02111 | 1 | 22,264,715 | 22,264,793 | 11 | 1  | 0  | yes |    |
| at_locus.02112 | 1 | 22,264,996 | 22,265,189 | 6  | 0  | 0  | yes |    |
| at_locus.02113 | 1 | 22,326,795 | 22,327,186 | 10 | 0  | 6  | yes |    |
| at_locus.02114 | 1 | 22,361,206 | 22,361,628 | 13 | 0  | 1  | no  | TE |
| at_locus.02115 | 1 | 22,376,205 | 22,376,436 | 4  | 4  | 0  | yes |    |
| at_locus.02116 | 1 | 22,412,562 | 22,412,761 | 9  | 0  | 3  | yes |    |



|                |   |            |            |    |    |    |     |    |
|----------------|---|------------|------------|----|----|----|-----|----|
| at_locus.02117 | 1 | 22,447,301 | 22,447,550 | 5  | 0  | 0  | yes |    |
| at_locus.02118 | 1 | 22,454,369 | 22,455,668 | 52 | 3  | 1  | no  | TE |
| at_locus.02119 | 1 | 22,463,932 | 22,464,002 | 5  | 0  | 0  | yes |    |
| at_locus.02120 | 1 | 22,545,805 | 22,545,885 | 6  | 0  | 0  | no  | TE |
| at_locus.02121 | 1 | 22,566,369 | 22,566,717 | 6  | 0  | 0  | yes | TE |
| at_locus.02122 | 1 | 22,596,292 | 22,596,380 | 10 | 0  | 0  | yes |    |
| at_locus.02123 | 1 | 22,624,497 | 22,624,649 | 28 | 1  | 1  | yes | TE |
| at_locus.02124 | 1 | 22,625,009 | 22,625,128 | 16 | 0  | 0  | no  | TE |
| at_locus.02125 | 1 | 22,625,350 | 22,625,412 | 5  | 0  | 0  | no  | TE |
| at_locus.02126 | 1 | 22,625,895 | 22,625,962 | 7  | 0  | 0  | no  | TE |
| at_locus.02127 | 1 | 22,697,618 | 22,697,831 | 4  | 0  | 0  | yes | TE |
| at_locus.02128 | 1 | 22,698,147 | 22,698,744 | 7  | 0  | 5  | no  | TE |
| at_locus.02129 | 1 | 22,702,788 | 22,703,018 | 6  | 0  | 1  | yes | TE |
| at_locus.02130 | 1 | 22,735,753 | 22,735,988 | 5  | 0  | 0  | no  |    |
| at_locus.02131 | 1 | 22,746,808 | 22,747,096 | 10 | 0  | 0  | yes |    |
| at_locus.02132 | 1 | 22,783,607 | 22,783,704 | 7  | 0  | 0  | yes |    |
| at_locus.02133 | 1 | 22,832,567 | 22,832,810 | 6  | 0  | 1  | yes | TE |
| at_locus.02134 | 1 | 22,876,014 | 22,876,615 | 18 | 0  | 5  | yes | TE |
| at_locus.02135 | 1 | 22,891,536 | 22,891,849 | 8  | 0  | 5  | yes |    |
| at_locus.02136 | 1 | 22,892,780 | 22,893,201 | 29 | 1  | 12 | yes |    |
| at_locus.02137 | 1 | 22,894,297 | 22,894,350 | 5  | 0  | 0  | yes |    |
| at_locus.02138 | 1 | 22,933,759 | 22,933,842 | 10 | 23 | 28 | yes |    |
| at_locus.02139 | 1 | 22,989,062 | 22,989,346 | 4  | 0  | 0  | yes |    |
| at_locus.02140 | 1 | 22,995,912 | 22,996,469 | 48 | 2  | 0  | no  | TE |
| at_locus.02141 | 1 | 22,996,691 | 22,997,009 | 10 | 0  | 0  | no  | TE |
| at_locus.02142 | 1 | 22,997,689 | 22,997,718 | 7  | 0  | 0  | no  | TE |
| at_locus.02143 | 1 | 23,035,244 | 23,035,464 | 23 | 0  | 0  | yes | TE |
| at_locus.02144 | 1 | 23,071,849 | 23,072,086 | 9  | 1  | 1  | yes |    |
| at_locus.02145 | 1 | 23,097,397 | 23,097,519 | 13 | 1  | 0  | yes | TE |
| at_locus.02146 | 1 | 23,121,994 | 23,122,367 | 8  | 0  | 0  | no  | TE |
| at_locus.02147 | 1 | 23,126,024 | 23,126,239 | 0  | 0  | 5  | no  | TE |
| at_locus.02148 | 1 | 23,126,544 | 23,126,780 | 8  | 0  | 0  | no  | TE |
| at_locus.02149 | 1 | 23,128,893 | 23,129,356 | 35 | 1  | 1  | no  | TE |
| at_locus.02150 | 1 | 23,132,945 | 23,133,096 | 2  | 6  | 1  | yes |    |
| at_locus.02151 | 1 | 23,156,178 | 23,156,837 | 29 | 0  | 10 | yes |    |
| at_locus.02152 | 1 | 23,156,874 | 23,156,921 | 7  | 0  | 0  | no  |    |
| at_locus.02153 | 1 | 23,168,668 | 23,168,727 | 4  | 0  | 0  | yes |    |

|                |   |            |            |     |     |     |     |    |
|----------------|---|------------|------------|-----|-----|-----|-----|----|
| at_locus.02154 | 1 | 23,178,076 | 23,178,368 | 15  | 2   | 1   | no  | TE |
| at_locus.02155 | 1 | 23,181,719 | 23,182,274 | 14  | 28  | 7   | no  |    |
| at_locus.02156 | 1 | 23,194,543 | 23,194,682 | 6   | 0   | 0   | no  |    |
| at_locus.02157 | 1 | 23,201,185 | 23,201,524 | 4   | 0   | 0   | yes | TE |
| at_locus.02158 | 1 | 23,208,670 | 23,209,064 | 2   | 17  | 3   | no  |    |
| at_locus.02159 | 1 | 23,209,281 | 23,209,751 | 8   | 24  | 11  | no  |    |
| at_locus.02160 | 1 | 23,216,093 | 23,216,197 | 5   | 0   | 0   | yes | TE |
| at_locus.02161 | 1 | 23,217,319 | 23,217,410 | 11  | 0   | 0   | yes | TE |
| at_locus.02162 | 1 | 23,218,040 | 23,219,036 | 47  | 4   | 1   | no  | TE |
| at_locus.02163 | 1 | 23,243,969 | 23,244,113 | 10  | 0   | 1   | yes | TE |
| at_locus.02164 | 1 | 23,279,788 | 23,280,051 | 2   | 18  | 12  | yes |    |
| at_locus.02165 | 1 | 23,284,123 | 23,284,436 | 14  | 0   | 0   | yes |    |
| at_locus.02166 | 1 | 23,299,965 | 23,300,462 | 10  | 1   | 8   | no  | TE |
| at_locus.02167 | 1 | 23,300,720 | 23,300,924 | 6   | 0   | 0   | no  | TE |
| at_locus.02168 | 1 | 23,303,289 | 23,304,391 | 50  | 198 | 68  | yes |    |
| at_locus.02169 | 1 | 23,305,790 | 23,306,777 | 51  | 143 | 49  | yes |    |
| at_locus.02170 | 1 | 23,309,687 | 23,309,834 | 5   | 0   | 0   | yes | TE |
| at_locus.02171 | 1 | 23,310,862 | 23,311,734 | 15  | 84  | 32  | no  |    |
| at_locus.02172 | 1 | 23,349,052 | 23,349,164 | 5   | 4   | 0   | yes |    |
| at_locus.02173 | 1 | 23,389,548 | 23,390,250 | 12  | 37  | 11  | no  |    |
| at_locus.02174 | 1 | 23,392,593 | 23,393,904 | 24  | 73  | 33  | yes |    |
| at_locus.02175 | 1 | 23,417,047 | 23,418,057 | 30  | 122 | 44  | yes |    |
| at_locus.02176 | 1 | 23,423,628 | 23,424,608 | 39  | 148 | 56  | yes |    |
| at_locus.02177 | 1 | 23,439,443 | 23,439,699 | 5   | 0   | 1   | yes |    |
| at_locus.02178 | 1 | 23,455,133 | 23,455,569 | 1   | 19  | 3   | yes |    |
| at_locus.02179 | 1 | 23,457,297 | 23,458,664 | 218 | 0   | 185 | yes |    |
| at_locus.02180 | 1 | 23,492,903 | 23,493,289 | 3   | 19  | 7   | no  |    |
| at_locus.02181 | 1 | 23,493,869 | 23,494,424 | 14  | 30  | 8   | no  |    |
| at_locus.02182 | 1 | 23,511,574 | 23,512,753 | 28  | 80  | 24  | no  |    |
| at_locus.02183 | 1 | 23,557,458 | 23,557,711 | 11  | 0   | 0   | no  | TE |
| at_locus.02184 | 1 | 23,558,029 | 23,558,104 | 13  | 0   | 0   | no  | TE |
| at_locus.02185 | 1 | 23,570,009 | 23,570,248 | 8   | 0   | 0   | yes |    |
| at_locus.02186 | 1 | 23,590,847 | 23,590,869 | 2   | 18  | 10  | no  |    |
| at_locus.02187 | 1 | 23,591,298 | 23,591,523 | 3   | 23  | 4   | no  |    |
| at_locus.02188 | 1 | 23,617,245 | 23,617,298 | 6   | 0   | 0   | yes |    |
| at_locus.02189 | 1 | 23,643,758 | 23,643,931 | 4   | 0   | 0   | yes |    |
| at_locus.02190 | 1 | 23,655,264 | 23,655,444 | 16  | 0   | 0   | yes |    |

|                |   |            |            |     |    |     |     |    |
|----------------|---|------------|------------|-----|----|-----|-----|----|
| at_locus.02191 | 1 | 23,727,296 | 23,727,613 | 13  | 0  | 0   | yes |    |
| at_locus.02192 | 1 | 23,879,027 | 23,879,230 | 10  | 0  | 0   | no  |    |
| at_locus.02193 | 1 | 23,880,194 | 23,880,264 | 14  | 2  | 0   | no  | TE |
| at_locus.02194 | 1 | 23,880,497 | 23,880,911 | 27  | 1  | 0   | yes | TE |
| at_locus.02195 | 1 | 23,884,196 | 23,884,591 | 18  | 0  | 26  | yes |    |
| at_locus.02196 | 1 | 23,888,487 | 23,889,013 | 6   | 0  | 19  | yes |    |
| at_locus.02197 | 1 | 23,910,810 | 23,910,994 | 14  | 0  | 0   | yes |    |
| at_locus.02198 | 1 | 23,929,228 | 23,929,278 | 4   | 0  | 0   | yes |    |
| at_locus.02199 | 1 | 23,944,202 | 23,944,530 | 3   | 0  | 5   | yes | TE |
| at_locus.02200 | 1 | 24,030,977 | 24,031,256 | 5   | 0  | 1   | no  | TE |
| at_locus.02201 | 1 | 24,194,499 | 24,194,608 | 3   | 6  | 4   | yes |    |
| at_locus.02202 | 1 | 24,254,560 | 24,254,657 | 22  | 0  | 0   | yes |    |
| at_locus.02203 | 1 | 24,354,246 | 24,354,490 | 6   | 0  | 0   | yes | TE |
| at_locus.02204 | 1 | 24,355,298 | 24,355,493 | 5   | 0  | 0   | yes | TE |
| at_locus.02205 | 1 | 24,355,790 | 24,356,302 | 11  | 0  | 6   | no  | TE |
| at_locus.02206 | 1 | 24,356,616 | 24,356,649 | 5   | 0  | 0   | yes | TE |
| at_locus.02207 | 1 | 24,363,747 | 24,364,814 | 21  | 1  | 22  | yes | TE |
| at_locus.02208 | 1 | 24,388,371 | 24,388,842 | 29  | 0  | 0   | yes |    |
| at_locus.02209 | 1 | 24,429,197 | 24,429,954 | 524 | 9  | 384 | yes |    |
| at_locus.02210 | 1 | 24,430,156 | 24,430,518 | 24  | 0  | 7   | yes |    |
| at_locus.02211 | 1 | 24,432,690 | 24,432,846 | 5   | 0  | 1   | no  | TE |
| at_locus.02212 | 1 | 24,485,532 | 24,486,290 | 125 | 1  | 73  | yes |    |
| at_locus.02213 | 1 | 24,486,530 | 24,487,606 | 82  | 0  | 52  | yes |    |
| at_locus.02214 | 1 | 24,535,734 | 24,535,838 | 8   | 0  | 0   | yes | TE |
| at_locus.02215 | 1 | 24,547,380 | 24,547,406 | 5   | 0  | 0   | yes |    |
| at_locus.02216 | 1 | 24,557,518 | 24,557,681 | 3   | 2  | 6   | yes |    |
| at_locus.02217 | 1 | 24,626,812 | 24,627,093 | 14  | 0  | 4   | yes |    |
| at_locus.02218 | 1 | 24,627,552 | 24,627,917 | 26  | 0  | 15  | yes |    |
| at_locus.02219 | 1 | 24,649,316 | 24,649,725 | 10  | 0  | 0   | no  | TE |
| at_locus.02220 | 1 | 24,709,482 | 24,709,678 | 21  | 0  | 0   | yes | TE |
| at_locus.02221 | 1 | 24,718,364 | 24,718,481 | 2   | 4  | 13  | no  |    |
| at_locus.02222 | 1 | 24,722,428 | 24,722,585 | 10  | 0  | 1   | no  | TE |
| at_locus.02223 | 1 | 24,724,724 | 24,725,161 | 47  | 41 | 89  | yes |    |
| at_locus.02224 | 1 | 24,744,799 | 24,745,861 | 19  | 0  | 10  | yes | TE |
| at_locus.02225 | 1 | 24,748,694 | 24,748,998 | 10  | 0  | 0   | no  |    |
| at_locus.02226 | 1 | 24,776,627 | 24,776,663 | 5   | 0  | 0   | no  |    |
| at_locus.02227 | 1 | 24,780,233 | 24,780,543 | 12  | 0  | 0   | yes |    |

|                |   |            |            |      |      |     |     |    |
|----------------|---|------------|------------|------|------|-----|-----|----|
| at_locus.02228 | 1 | 24,835,332 | 24,835,886 | 44   | 0    | 3   | yes | TE |
| at_locus.02229 | 1 | 24,836,210 | 24,836,286 | 12   | 0    | 0   | no  | TE |
| at_locus.02230 | 1 | 24,839,012 | 24,839,152 | 4    | 0    | 0   | yes |    |
| at_locus.02231 | 1 | 24,874,065 | 24,874,087 | 4    | 40   | 36  | no  |    |
| at_locus.02232 | 1 | 24,877,970 | 24,877,992 | 4    | 40   | 36  | no  |    |
| at_locus.02233 | 1 | 24,887,724 | 24,888,149 | 1200 | 2993 | 731 | yes |    |
| at_locus.02234 | 1 | 24,911,267 | 24,911,296 | 7    | 0    | 0   | no  | TE |
| at_locus.02235 | 1 | 24,911,439 | 24,911,825 | 1    | 0    | 3   | no  | TE |
| at_locus.02236 | 1 | 24,912,082 | 24,912,276 | 64   | 1    | 3   | yes | TE |
| at_locus.02237 | 1 | 24,916,938 | 24,916,959 | 220  | 585  | 16  | no  |    |
| at_locus.02238 | 1 | 24,924,767 | 24,924,788 | 220  | 585  | 16  | no  |    |
| at_locus.02239 | 1 | 24,951,764 | 24,952,021 | 19   | 0    | 0   | yes |    |
| at_locus.02240 | 1 | 24,960,312 | 24,960,591 | 13   | 0    | 0   | yes |    |
| at_locus.02241 | 1 | 25,009,320 | 25,009,362 | 5    | 0    | 0   | yes |    |
| at_locus.02242 | 1 | 25,037,114 | 25,037,478 | 7    | 0    | 0   | yes |    |
| at_locus.02243 | 1 | 25,052,163 | 25,052,517 | 2    | 8    | 4   | yes |    |
| at_locus.02244 | 1 | 25,101,556 | 25,101,748 | 69   | 1    | 3   | yes | TE |
| at_locus.02245 | 1 | 25,102,575 | 25,102,705 | 13   | 0    | 0   | yes | TE |
| at_locus.02246 | 1 | 25,163,714 | 25,164,114 | 5    | 0    | 5   | yes | TE |
| at_locus.02247 | 1 | 25,183,809 | 25,184,615 | 10   | 0    | 6   | yes | TE |
| at_locus.02248 | 1 | 25,184,775 | 25,184,855 | 1    | 0    | 4   | no  | TE |
| at_locus.02249 | 1 | 25,264,700 | 25,265,099 | 12   | 0    | 5   | yes |    |
| at_locus.02250 | 1 | 25,269,689 | 25,269,930 | 10   | 0    | 0   | yes |    |
| at_locus.02251 | 1 | 25,282,648 | 25,282,891 | 5    | 17   | 10  | yes |    |
| at_locus.02252 | 1 | 25,347,115 | 25,347,360 | 7    | 0    | 5   | yes | TE |
| at_locus.02253 | 1 | 25,352,810 | 25,353,307 | 37   | 2    | 22  | yes |    |
| at_locus.02254 | 1 | 25,361,532 | 25,361,987 | 26   | 0    | 1   | no  | TE |
| at_locus.02255 | 1 | 25,404,165 | 25,404,361 | 19   | 0    | 0   | yes | TE |
| at_locus.02256 | 1 | 25,405,049 | 25,405,119 | 6    | 0    | 1   | no  | TE |
| at_locus.02257 | 1 | 25,456,425 | 25,456,902 | 10   | 0    | 9   | yes |    |
| at_locus.02258 | 1 | 25,491,828 | 25,491,873 | 4    | 0    | 0   | yes |    |
| at_locus.02259 | 1 | 25,540,349 | 25,540,397 | 4    | 0    | 0   | yes |    |
| at_locus.02260 | 1 | 25,643,361 | 25,643,475 | 5    | 0    | 0   | yes | TE |
| at_locus.02261 | 1 | 25,643,700 | 25,643,898 | 1    | 0    | 4   | no  | TE |
| at_locus.02262 | 1 | 25,645,180 | 25,645,565 | 25   | 1    | 1   | yes | TE |
| at_locus.02263 | 1 | 25,663,698 | 25,663,907 | 13   | 0    | 0   | yes | TE |
| at_locus.02264 | 1 | 25,677,587 | 25,677,811 | 13   | 0    | 1   | yes |    |

|                |   |            |            |    |    |    |     |    |
|----------------|---|------------|------------|----|----|----|-----|----|
| at_locus.02265 | 1 | 25,700,235 | 25,700,276 | 5  | 0  | 0  | no  | TE |
| at_locus.02266 | 1 | 25,726,230 | 25,726,397 | 9  | 0  | 1  | yes | TE |
| at_locus.02267 | 1 | 25,733,801 | 25,733,963 | 8  | 2  | 0  | yes |    |
| at_locus.02268 | 1 | 25,783,426 | 25,783,898 | 12 | 0  | 1  | no  | TE |
| at_locus.02270 | 1 | 25,932,183 | 25,932,491 | 39 | 1  | 13 | yes |    |
| at_locus.02272 | 1 | 25,966,125 | 25,966,385 | 13 | 0  | 0  | yes | TE |
| at_locus.02273 | 1 | 25,966,835 | 25,966,912 | 9  | 0  | 0  | no  | TE |
| at_locus.02274 | 1 | 26,035,493 | 26,035,788 | 10 | 0  | 6  | yes |    |
| at_locus.02275 | 1 | 26,173,056 | 26,173,892 | 61 | 3  | 0  | no  | TE |
| at_locus.02276 | 1 | 26,174,120 | 26,174,432 | 12 | 2  | 0  | no  | TE |
| at_locus.02277 | 1 | 26,175,058 | 26,175,143 | 9  | 0  | 0  | no  | TE |
| at_locus.02278 | 1 | 26,200,073 | 26,201,009 | 31 | 0  | 0  | yes |    |
| at_locus.02279 | 1 | 26,310,625 | 26,311,166 | 17 | 0  | 0  | yes | TE |
| at_locus.02280 | 1 | 26,339,673 | 26,339,761 | 4  | 0  | 0  | yes |    |
| at_locus.02281 | 1 | 26,347,383 | 26,348,120 | 14 | 0  | 8  | yes |    |
| at_locus.02282 | 1 | 26,372,401 | 26,372,457 | 4  | 0  | 0  | yes | TE |
| at_locus.02283 | 1 | 26,374,909 | 26,375,225 | 4  | 0  | 0  | yes | TE |
| at_locus.02284 | 1 | 26,378,036 | 26,378,775 | 11 | 0  | 4  | yes | TE |
| at_locus.02285 | 1 | 26,433,403 | 26,433,518 | 4  | 4  | 3  | yes |    |
| at_locus.02286 | 1 | 26,514,431 | 26,514,889 | 19 | 1  | 0  | no  | TE |
| at_locus.02287 | 1 | 26,555,242 | 26,555,276 | 8  | 0  | 0  | no  | TE |
| at_locus.02288 | 1 | 26,555,506 | 26,555,709 | 15 | 0  | 1  | yes | TE |
| at_locus.02289 | 1 | 26,611,806 | 26,611,924 | 1  | 7  | 1  | yes |    |
| at_locus.02290 | 1 | 26,654,464 | 26,654,529 | 20 | 0  | 0  | yes | TE |
| at_locus.02291 | 1 | 26,725,995 | 26,726,066 | 10 | 2  | 0  | yes |    |
| at_locus.02292 | 1 | 26,776,569 | 26,776,589 | 1  | 7  | 3  | no  |    |
| at_locus.02293 | 1 | 26,777,356 | 26,777,377 | 2  | 12 | 3  | yes |    |
| at_locus.02294 | 1 | 26,783,368 | 26,783,428 | 6  | 0  | 0  | no  | TE |
| at_locus.02295 | 1 | 26,784,221 | 26,784,342 | 7  | 0  | 1  | no  | TE |
| at_locus.02296 | 1 | 26,784,640 | 26,784,709 | 7  | 0  | 0  | no  | TE |
| at_locus.02297 | 1 | 26,883,979 | 26,885,126 | 35 | 0  | 2  | yes | TE |
| at_locus.02298 | 1 | 27,072,071 | 27,072,408 | 1  | 0  | 5  | yes |    |
| at_locus.02299 | 1 | 27,244,383 | 27,244,935 | 12 | 1  | 1  | yes | TE |
| at_locus.02300 | 1 | 27,337,616 | 27,337,685 | 6  | 0  | 0  | yes |    |
| at_locus.02301 | 1 | 27,352,356 | 27,352,765 | 0  | 5  | 0  | yes |    |
| at_locus.02302 | 1 | 27,432,118 | 27,432,346 | 4  | 0  | 0  | yes |    |
| at_locus.02303 | 1 | 27,444,282 | 27,444,434 | 6  | 0  | 1  | yes | TE |

|                |   |            |            |     |     |     |     |    |
|----------------|---|------------|------------|-----|-----|-----|-----|----|
| at_locus.02304 | 1 | 27,639,111 | 27,640,128 | 9   | 0   | 19  | yes |    |
| at_locus.02305 | 1 | 27,641,160 | 27,641,575 | 8   | 0   | 3   | yes |    |
| at_locus.02306 | 1 | 27,688,543 | 27,688,777 | 6   | 0   | 0   | yes |    |
| at_locus.02307 | 1 | 27,714,228 | 27,714,344 | 4   | 0   | 0   | yes |    |
| at_locus.02308 | 1 | 27,716,894 | 27,717,189 | 339 | 987 | 307 | yes |    |
| at_locus.02309 | 1 | 27,863,384 | 27,863,518 | 4   | 0   | 0   | yes | TE |
| at_locus.02310 | 1 | 27,863,582 | 27,864,049 | 0   | 0   | 3   | no  | TE |
| at_locus.02311 | 1 | 27,864,146 | 27,864,505 | 7   | 0   | 1   | yes | TE |
| at_locus.02312 | 1 | 27,937,164 | 27,937,220 | 5   | 0   | 0   | yes | TE |
| at_locus.02313 | 1 | 27,975,796 | 27,975,951 | 6   | 0   | 0   | yes | TE |
| at_locus.02315 | 1 | 28,055,102 | 28,055,338 | 12  | 0   | 0   | yes |    |
| at_locus.02316 | 1 | 28,109,144 | 28,109,427 | 19  | 0   | 0   | yes |    |
| at_locus.02317 | 1 | 28,165,176 | 28,165,397 | 45  | 0   | 0   | no  | TE |
| at_locus.02318 | 1 | 28,165,727 | 28,165,864 | 44  | 3   | 0   | no  | TE |
| at_locus.02320 | 1 | 28,315,672 | 28,315,695 | 4   | 0   | 0   | no  | TE |
| at_locus.02323 | 1 | 28,531,130 | 28,531,199 | 4   | 0   | 0   | yes | TE |
| at_locus.02324 | 1 | 28,573,693 | 28,573,812 | 11  | 47  | 8   | yes |    |
| at_locus.02325 | 1 | 28,597,811 | 28,597,930 | 4   | 0   | 0   | no  |    |
| at_locus.02326 | 1 | 28,707,965 | 28,708,284 | 11  | 0   | 0   | no  |    |
| at_locus.02327 | 1 | 28,755,024 | 28,755,172 | 6   | 0   | 3   | no  |    |
| at_locus.02328 | 1 | 28,832,288 | 28,832,405 | 31  | 1   | 2   | yes | TE |
| at_locus.02329 | 1 | 28,894,302 | 28,894,540 | 1   | 1   | 7   | yes |    |
| at_locus.02330 | 1 | 28,894,767 | 28,895,058 | 4   | 0   | 1   | yes |    |
| at_locus.02331 | 1 | 28,896,371 | 28,896,420 | 5   | 0   | 0   | yes | TE |
| at_locus.02332 | 1 | 28,896,626 | 28,896,777 | 7   | 0   | 0   | yes | TE |
| at_locus.02333 | 1 | 28,969,465 | 28,970,319 | 93  | 2   | 91  | yes |    |
| at_locus.02334 | 1 | 28,970,529 | 28,971,064 | 66  | 1   | 9   | yes |    |
| at_locus.02335 | 1 | 28,999,412 | 28,999,582 | 8   | 0   | 4   | yes | TE |
| at_locus.02336 | 1 | 29,021,480 | 29,021,499 | 0   | 2   | 5   | yes |    |
| at_locus.02337 | 1 | 29,083,335 | 29,083,485 | 7   | 0   | 0   | yes | TE |
| at_locus.02338 | 1 | 29,083,881 | 29,083,905 | 4   | 0   | 0   | no  | TE |
| at_locus.02339 | 1 | 29,249,386 | 29,249,582 | 15  | 0   | 0   | no  | TE |
| at_locus.02340 | 1 | 29,268,258 | 29,268,545 | 16  | 0   | 0   | yes |    |
| at_locus.02341 | 1 | 29,291,115 | 29,291,315 | 4   | 0   | 0   | yes |    |
| at_locus.02342 | 1 | 29,324,626 | 29,324,918 | 15  | 2   | 1   | no  | TE |
| at_locus.02343 | 1 | 29,325,394 | 29,325,572 | 5   | 0   | 0   | no  | TE |
| at_locus.02344 | 1 | 29,347,617 | 29,347,638 | 0   | 4   | 0   | no  |    |

|                |   |            |            |      |       |      |     |    |
|----------------|---|------------|------------|------|-------|------|-----|----|
| at_locus.02345 | 1 | 29,382,726 | 29,382,964 | 6    | 0     | 5    | no  | TE |
| at_locus.02346 | 1 | 29,385,152 | 29,385,523 | 0    | 0     | 4    | no  | TE |
| at_locus.02347 | 1 | 29,427,355 | 29,427,460 | 14   | 36    | 10   | yes |    |
| at_locus.02348 | 1 | 29,432,889 | 29,433,144 | 1    | 6     | 1    | yes |    |
| at_locus.02349 | 1 | 29,477,247 | 29,477,569 | 6    | 2     | 0    | yes |    |
| at_locus.02350 | 1 | 29,616,479 | 29,616,632 | 11   | 0     | 0    | yes | TE |
| at_locus.02351 | 1 | 29,617,137 | 29,617,316 | 36   | 1     | 3    | yes | TE |
| at_locus.02352 | 1 | 29,779,156 | 29,779,276 | 6    | 0     | 0    | no  | TE |
| at_locus.02353 | 1 | 29,916,578 | 29,916,705 | 0    | 2     | 13   | yes |    |
| at_locus.02354 | 1 | 29,930,334 | 29,930,509 | 0    | 4     | 0    | yes |    |
| at_locus.02355 | 1 | 29,989,183 | 29,989,274 | 8    | 0     | 0    | no  | TE |
| at_locus.02356 | 1 | 30,172,869 | 30,173,246 | 5    | 1     | 0    | yes |    |
| at_locus.02357 | 1 | 30,204,975 | 30,205,277 | 25   | 1     | 0    | yes |    |
| at_locus.02358 | 1 | 30,255,872 | 30,256,743 | 22   | 0     | 1    | yes | TE |
| at_locus.02359 | 1 | 30,256,964 | 30,257,306 | 13   | 2     | 0    | no  | TE |
| at_locus.02360 | 1 | 30,257,914 | 30,259,169 | 101  | 6     | 2    | yes | TE |
| at_locus.02361 | 1 | 30,259,395 | 30,259,707 | 7    | 2     | 0    | no  | TE |
| at_locus.02362 | 1 | 30,432,409 | 30,432,562 | 2    | 0     | 0    | yes |    |
| at_locus.02363 | 2 | 1,030      | 13,130     | 5930 | 17450 | 6992 | yes | TE |
| at_locus.02364 | 2 | 13,310     | 14,137     | 17   | 2     | 16   | no  | TE |
| at_locus.02365 | 2 | 14,674     | 15,020     | 5    | 0     | 2    | no  | TE |
| at_locus.02366 | 2 | 16,568     | 17,458     | 20   | 2     | 19   | no  | TE |
| at_locus.02367 | 2 | 17,903     | 18,249     | 5    | 0     | 2    | no  | TE |
| at_locus.02368 | 2 | 22,928     | 23,818     | 22   | 2     | 20   | no  | TE |
| at_locus.02369 | 2 | 26,713     | 27,099     | 0    | 0     | 4    | no  | TE |
| at_locus.02370 | 2 | 27,389     | 27,901     | 14   | 2     | 11   | no  | TE |
| at_locus.02371 | 2 | 28,375     | 29,116     | 22   | 1     | 16   | no  | TE |
| at_locus.02372 | 2 | 31,531     | 32,876     | 27   | 0     | 23   | no  | TE |
| at_locus.02373 | 2 | 33,368     | 33,476     | 2    | 0     | 4    | no  | TE |
| at_locus.02374 | 2 | 34,465     | 36,013     | 29   | 0     | 22   | no  | TE |
| at_locus.02375 | 2 | 36,302     | 36,410     | 2    | 0     | 4    | no  | TE |
| at_locus.02376 | 2 | 41,541     | 42,222     | 9    | 0     | 1    | no  | TE |
| at_locus.02377 | 2 | 42,402     | 43,180     | 18   | 0     | 17   | no  | TE |
| at_locus.02378 | 2 | 43,706     | 44,052     | 5    | 0     | 2    | no  | TE |
| at_locus.02379 | 2 | 48,062     | 48,448     | 1    | 0     | 4    | no  | TE |
| at_locus.02380 | 2 | 48,739     | 49,517     | 18   | 0     | 17   | no  | TE |
| at_locus.02381 | 2 | 49,787     | 50,302     | 7    | 0     | 12   | yes | TE |

|                |   |         |         |    |   |    |     |    |
|----------------|---|---------|---------|----|---|----|-----|----|
| at_locus.02382 | 2 | 52,684  | 53,283  | 8  | 0 | 12 | yes | TE |
| at_locus.02383 | 2 | 58,216  | 58,920  | 10 | 1 | 11 | no  | TE |
| at_locus.02384 | 2 | 62,250  | 62,636  | 1  | 0 | 4  | no  | TE |
| at_locus.02385 | 2 | 62,926  | 64,771  | 39 | 3 | 58 | no  | TE |
| at_locus.02386 | 2 | 65,000  | 65,230  | 5  | 0 | 4  | no  | TE |
| at_locus.02387 | 2 | 65,706  | 68,188  | 72 | 6 | 26 | yes | TE |
| at_locus.02388 | 2 | 71,895  | 72,187  | 6  | 0 | 1  | yes | TE |
| at_locus.02389 | 2 | 163,336 | 163,514 | 20 | 0 | 0  | yes |    |
| at_locus.02390 | 2 | 178,396 | 178,621 | 5  | 0 | 0  | yes |    |
| at_locus.02391 | 2 | 184,260 | 184,474 | 1  | 0 | 4  | yes |    |
| at_locus.02392 | 2 | 187,297 | 187,477 | 5  | 0 | 0  | yes | TE |
| at_locus.02393 | 2 | 204,556 | 204,593 | 4  | 0 | 0  | yes | TE |
| at_locus.02394 | 2 | 205,205 | 205,472 | 4  | 0 | 0  | yes |    |
| at_locus.02395 | 2 | 241,107 | 241,130 | 4  | 0 | 0  | no  | TE |
| at_locus.02396 | 2 | 241,677 | 241,917 | 4  | 0 | 2  | no  | TE |
| at_locus.02397 | 2 | 243,864 | 244,173 | 6  | 0 | 1  | no  | TE |
| at_locus.02398 | 2 | 244,448 | 244,824 | 2  | 0 | 4  | yes | TE |
| at_locus.02399 | 2 | 275,838 | 275,993 | 16 | 0 | 0  | yes | TE |
| at_locus.02400 | 2 | 276,885 | 276,992 | 11 | 1 | 0  | yes | TE |
| at_locus.02401 | 2 | 314,688 | 315,088 | 11 | 0 | 0  | yes | TE |
| at_locus.02402 | 2 | 345,707 | 346,211 | 15 | 0 | 0  | yes |    |
| at_locus.02403 | 2 | 346,651 | 347,235 | 35 | 1 | 1  | yes | TE |
| at_locus.02404 | 2 | 373,131 | 373,157 | 12 | 0 | 0  | yes |    |
| at_locus.02405 | 2 | 378,050 | 378,096 | 1  | 0 | 7  | yes | TE |
| at_locus.02406 | 2 | 378,445 | 378,778 | 4  | 0 | 0  | yes | TE |
| at_locus.02407 | 2 | 394,806 | 395,019 | 13 | 0 | 0  | no  | TE |
| at_locus.02408 | 2 | 395,253 | 395,961 | 32 | 2 | 1  | no  | TE |
| at_locus.02409 | 2 | 402,789 | 403,114 | 20 | 0 | 1  | yes |    |
| at_locus.02410 | 2 | 416,371 | 416,454 | 6  | 0 | 0  | yes |    |
| at_locus.02411 | 2 | 438,646 | 438,677 | 5  | 0 | 0  | no  |    |
| at_locus.02412 | 2 | 455,735 | 456,180 | 12 | 1 | 3  | yes |    |
| at_locus.02413 | 2 | 472,320 | 472,371 | 8  | 0 | 0  | yes |    |
| at_locus.02414 | 2 | 492,482 | 492,573 | 6  | 0 | 0  | yes |    |
| at_locus.02415 | 2 | 499,992 | 500,069 | 11 | 0 | 0  | no  | TE |
| at_locus.02416 | 2 | 500,678 | 500,990 | 11 | 2 | 0  | no  | TE |
| at_locus.02417 | 2 | 501,212 | 501,938 | 33 | 3 | 1  | yes | TE |
| at_locus.02418 | 2 | 511,024 | 511,287 | 6  | 0 | 1  | no  |    |



|                |   |         |         |     |    |     |     |    |
|----------------|---|---------|---------|-----|----|-----|-----|----|
| at_locus.02419 | 2 | 537,259 | 537,617 | 6   | 0  | 0   | yes | TE |
| at_locus.02420 | 2 | 542,279 | 542,392 | 8   | 0  | 0   | yes | TE |
| at_locus.02421 | 2 | 543,016 | 544,162 | 40  | 2  | 1   | yes | TE |
| at_locus.02422 | 2 | 566,664 | 566,990 | 22  | 0  | 14  | yes | TE |
| at_locus.02423 | 2 | 567,300 | 567,828 | 6   | 0  | 4   | no  | TE |
| at_locus.02424 | 2 | 571,167 | 571,548 | 5   | 0  | 1   | no  | TE |
| at_locus.02425 | 2 | 572,152 | 573,016 | 7   | 0  | 9   | no  | TE |
| at_locus.02426 | 2 | 577,400 | 577,648 | 7   | 0  | 1   | yes | TE |
| at_locus.02427 | 2 | 577,879 | 578,339 | 7   | 1  | 5   | no  | TE |
| at_locus.02428 | 2 | 581,055 | 581,183 | 5   | 0  | 4   | no  | TE |
| at_locus.02429 | 2 | 581,774 | 582,597 | 43  | 0  | 21  | yes | TE |
| at_locus.02430 | 2 | 612,781 | 612,922 | 8   | 2  | 0   | yes | TE |
| at_locus.02431 | 2 | 613,999 | 614,081 | 10  | 0  | 0   | yes |    |
| at_locus.02432 | 2 | 616,713 | 616,756 | 5   | 0  | 0   | yes |    |
| at_locus.02433 | 2 | 631,094 | 631,226 | 6   | 0  | 0   | yes |    |
| at_locus.02434 | 2 | 637,082 | 637,701 | 6   | 0  | 0   | yes | TE |
| at_locus.02435 | 2 | 637,733 | 638,488 | 88  | 4  | 28  | yes |    |
| at_locus.02436 | 2 | 638,696 | 639,530 | 150 | 4  | 165 | yes |    |
| at_locus.02437 | 2 | 687,372 | 687,794 | 8   | 0  | 8   | yes |    |
| at_locus.02439 | 2 | 708,658 | 709,029 | 28  | 2  | 0   | no  | TE |
| at_locus.02440 | 2 | 709,298 | 709,838 | 6   | 0  | 0   | no  | TE |
| at_locus.02441 | 2 | 762,490 | 762,550 | 6   | 0  | 0   | yes | TE |
| at_locus.02442 | 2 | 768,476 | 768,730 | 32  | 1  | 0   | yes |    |
| at_locus.02443 | 2 | 771,384 | 771,512 | 0   | 6  | 2   | yes |    |
| at_locus.02444 | 2 | 786,949 | 787,216 | 12  | 0  | 12  | yes |    |
| at_locus.02445 | 2 | 795,525 | 796,084 | 22  | 0  | 4   | yes | TE |
| at_locus.02446 | 2 | 808,277 | 808,778 | 19  | 0  | 7   | yes | TE |
| at_locus.02447 | 2 | 819,520 | 819,568 | 0   | 4  | 0   | yes |    |
| at_locus.02448 | 2 | 819,574 | 822,631 | 29  | 80 | 50  | yes | TE |
| at_locus.02449 | 2 | 822,879 | 823,280 | 4   | 9  | 2   | yes | TE |
| at_locus.02450 | 2 | 825,443 | 825,516 | 8   | 0  | 0   | no  | TE |
| at_locus.02451 | 2 | 826,121 | 826,172 | 15  | 0  | 0   | no  | TE |
| at_locus.02453 | 2 | 849,791 | 849,972 | 1   | 10 | 9   | yes |    |
| at_locus.02454 | 2 | 852,873 | 852,988 | 0   | 8  | 7   | no  |    |
| at_locus.02455 | 2 | 870,844 | 871,206 | 2   | 0  | 4   | no  |    |
| at_locus.02456 | 2 | 871,444 | 872,329 | 19  | 0  | 11  | yes | TE |
| at_locus.02457 | 2 | 877,778 | 878,361 | 11  | 0  | 15  | yes | TE |

|                |   |           |           |    |   |    |     |    |
|----------------|---|-----------|-----------|----|---|----|-----|----|
| at_locus.02458 | 2 | 885,728   | 886,197   | 2  | 0 | 4  | no  |    |
| at_locus.02459 | 2 | 887,378   | 887,941   | 46 | 2 | 54 | no  |    |
| at_locus.02460 | 2 | 895,651   | 896,120   | 2  | 0 | 4  | no  |    |
| at_locus.02461 | 2 | 897,289   | 897,852   | 46 | 2 | 54 | no  |    |
| at_locus.02462 | 2 | 904,377   | 904,872   | 8  | 0 | 0  | yes |    |
| at_locus.02463 | 2 | 905,080   | 905,371   | 5  | 0 | 0  | yes |    |
| at_locus.02464 | 2 | 909,731   | 910,551   | 36 | 0 | 7  | yes | TE |
| at_locus.02465 | 2 | 911,341   | 912,566   | 26 | 0 | 15 | yes | TE |
| at_locus.02466 | 2 | 912,676   | 912,976   | 36 | 0 | 2  | no  | TE |
| at_locus.02467 | 2 | 913,348   | 914,470   | 49 | 1 | 18 | no  | TE |
| at_locus.02468 | 2 | 926,233   | 926,307   | 4  | 0 | 5  | no  | TE |
| at_locus.02469 | 2 | 927,599   | 927,945   | 1  | 1 | 5  | no  | TE |
| at_locus.02470 | 2 | 929,861   | 929,935   | 4  | 0 | 5  | no  | TE |
| at_locus.02471 | 2 | 932,511   | 933,018   | 5  | 0 | 2  | yes | TE |
| at_locus.02472 | 2 | 980,139   | 980,622   | 18 | 0 | 0  | yes | TE |
| at_locus.02473 | 2 | 984,134   | 984,192   | 4  | 0 | 0  | yes |    |
| at_locus.02474 | 2 | 1,010,775 | 1,011,829 | 18 | 0 | 4  | no  | TE |
| at_locus.02475 | 2 | 1,012,045 | 1,012,349 | 7  | 0 | 0  | no  | TE |
| at_locus.02476 | 2 | 1,012,650 | 1,012,994 | 7  | 1 | 3  | yes | TE |
| at_locus.02477 | 2 | 1,018,975 | 1,019,110 | 4  | 0 | 0  | yes | TE |
| at_locus.02478 | 2 | 1,027,569 | 1,027,754 | 5  | 0 | 0  | yes |    |
| at_locus.02479 | 2 | 1,048,662 | 1,049,390 | 9  | 0 | 0  | yes | TE |
| at_locus.02480 | 2 | 1,050,160 | 1,050,377 | 8  | 2 | 0  | yes |    |
| at_locus.02482 | 2 | 1,065,642 | 1,065,851 | 5  | 0 | 0  | yes |    |
| at_locus.02483 | 2 | 1,075,436 | 1,075,898 | 15 | 0 | 8  | yes | TE |
| at_locus.02484 | 2 | 1,076,317 | 1,076,399 | 11 | 0 | 0  | no  | TE |
| at_locus.02485 | 2 | 1,078,820 | 1,078,969 | 17 | 1 | 1  | yes | TE |
| at_locus.02486 | 2 | 1,085,296 | 1,085,861 | 5  | 0 | 8  | yes | TE |
| at_locus.02487 | 2 | 1,086,417 | 1,086,833 | 5  | 0 | 10 | yes | TE |
| at_locus.02488 | 2 | 1,109,160 | 1,110,173 | 11 | 0 | 16 | yes | TE |
| at_locus.02489 | 2 | 1,111,984 | 1,112,918 | 30 | 0 | 23 | yes |    |
| at_locus.02490 | 2 | 1,123,798 | 1,123,871 | 19 | 0 | 4  | yes |    |
| at_locus.02491 | 2 | 1,155,033 | 1,155,529 | 12 | 0 | 7  | yes |    |
| at_locus.02492 | 2 | 1,167,490 | 1,167,559 | 14 | 0 | 0  | yes |    |
| at_locus.02493 | 2 | 1,178,774 | 1,179,090 | 0  | 0 | 7  | yes |    |
| at_locus.02494 | 2 | 1,194,126 | 1,194,493 | 13 | 1 | 0  | yes |    |
| at_locus.02495 | 2 | 1,201,274 | 1,201,409 | 0  | 0 | 4  | yes |    |

|                |   |           |           |    |   |    |     |    |
|----------------|---|-----------|-----------|----|---|----|-----|----|
| at_locus.02496 | 2 | 1,203,092 | 1,203,366 | 1  | 0 | 5  | yes |    |
| at_locus.02497 | 2 | 1,205,414 | 1,205,919 | 10 | 0 | 7  | yes |    |
| at_locus.02498 | 2 | 1,206,522 | 1,206,960 | 18 | 0 | 6  | yes |    |
| at_locus.02499 | 2 | 1,207,457 | 1,207,871 | 32 | 0 | 28 | yes | TE |
| at_locus.02500 | 2 | 1,208,084 | 1,208,731 | 42 | 0 | 23 | yes | TE |
| at_locus.02501 | 2 | 1,214,769 | 1,214,794 | 3  | 0 | 5  | yes |    |
| at_locus.02502 | 2 | 1,215,084 | 1,215,631 | 5  | 0 | 7  | yes |    |
| at_locus.02503 | 2 | 1,218,262 | 1,218,686 | 7  | 1 | 7  | yes |    |
| at_locus.02504 | 2 | 1,221,767 | 1,222,240 | 4  | 0 | 8  | yes |    |
| at_locus.02505 | 2 | 1,241,382 | 1,241,464 | 1  | 0 | 5  | no  | TE |
| at_locus.02506 | 2 | 1,241,756 | 1,242,484 | 12 | 0 | 5  | yes | TE |
| at_locus.02507 | 2 | 1,246,396 | 1,246,748 | 5  | 0 | 9  | no  |    |
| at_locus.02508 | 2 | 1,263,044 | 1,263,082 | 4  | 0 | 0  | no  |    |
| at_locus.02509 | 2 | 1,265,116 | 1,265,505 | 5  | 0 | 5  | yes | TE |
| at_locus.02510 | 2 | 1,266,270 | 1,266,518 | 0  | 2 | 6  | yes | TE |
| at_locus.02511 | 2 | 1,267,491 | 1,267,806 | 4  | 0 | 0  | yes | TE |
| at_locus.02512 | 2 | 1,268,426 | 1,268,730 | 4  | 0 | 6  | no  | TE |
| at_locus.02513 | 2 | 1,271,493 | 1,271,803 | 5  | 3 | 0  | no  | TE |
| at_locus.02514 | 2 | 1,293,724 | 1,294,237 | 14 | 0 | 2  | yes | TE |
| at_locus.02515 | 2 | 1,302,540 | 1,302,588 | 5  | 0 | 1  | no  | TE |
| at_locus.02516 | 2 | 1,303,038 | 1,303,110 | 9  | 0 | 1  | no  | TE |
| at_locus.02517 | 2 | 1,311,302 | 1,311,552 | 4  | 0 | 0  | no  |    |
| at_locus.02518 | 2 | 1,314,073 | 1,314,111 | 14 | 0 | 2  | no  | TE |
| at_locus.02519 | 2 | 1,318,506 | 1,318,576 | 6  | 0 | 0  | no  | TE |
| at_locus.02520 | 2 | 1,322,066 | 1,322,182 | 13 | 0 | 0  | no  | TE |
| at_locus.02521 | 2 | 1,322,824 | 1,322,851 | 4  | 0 | 0  | no  | TE |
| at_locus.02522 | 2 | 1,342,319 | 1,342,658 | 10 | 0 | 3  | yes |    |
| at_locus.02523 | 2 | 1,344,917 | 1,345,149 | 5  | 1 | 3  | yes |    |
| at_locus.02524 | 2 | 1,346,085 | 1,346,398 | 12 | 0 | 8  | yes |    |
| at_locus.02525 | 2 | 1,346,845 | 1,347,073 | 0  | 0 | 5  | yes |    |
| at_locus.02526 | 2 | 1,347,211 | 1,347,331 | 6  | 0 | 0  | no  | TE |
| at_locus.02527 | 2 | 1,348,750 | 1,349,300 | 4  | 0 | 2  | yes |    |
| at_locus.02528 | 2 | 1,349,720 | 1,350,236 | 58 | 2 | 32 | yes |    |
| at_locus.02529 | 2 | 1,353,390 | 1,353,574 | 21 | 0 | 1  | yes | TE |
| at_locus.02530 | 2 | 1,367,474 | 1,367,498 | 4  | 0 | 0  | no  | TE |
| at_locus.02531 | 2 | 1,370,786 | 1,370,938 | 11 | 0 | 0  | no  | TE |
| at_locus.02532 | 2 | 1,371,149 | 1,371,451 | 1  | 0 | 3  | yes | TE |

|                |   |           |           |    |   |    |     |    |
|----------------|---|-----------|-----------|----|---|----|-----|----|
| at_locus.02533 | 2 | 1,371,707 | 1,371,791 | 19 | 0 | 0  | yes | TE |
| at_locus.02534 | 2 | 1,380,660 | 1,380,740 | 4  | 0 | 0  | no  | TE |
| at_locus.02535 | 2 | 1,381,126 | 1,381,245 | 11 | 0 | 0  | yes | TE |
| at_locus.02536 | 2 | 1,383,552 | 1,383,766 | 14 | 0 | 0  | no  | TE |
| at_locus.02537 | 2 | 1,388,830 | 1,389,492 | 18 | 0 | 10 | no  | TE |
| at_locus.02538 | 2 | 1,393,718 | 1,393,901 | 19 | 0 | 1  | yes | TE |
| at_locus.02539 | 2 | 1,395,090 | 1,396,003 | 76 | 1 | 10 | yes | TE |
| at_locus.02540 | 2 | 1,396,843 | 1,397,091 | 5  | 0 | 4  | no  | TE |
| at_locus.02541 | 2 | 1,397,363 | 1,397,626 | 4  | 0 | 0  | no  | TE |
| at_locus.02542 | 2 | 1,397,799 | 1,398,158 | 36 | 0 | 4  | no  | TE |
| at_locus.02543 | 2 | 1,398,543 | 1,399,563 | 50 | 0 | 20 | yes | TE |
| at_locus.02544 | 2 | 1,409,938 | 1,410,039 | 8  | 0 | 0  | yes | TE |
| at_locus.02545 | 2 | 1,413,068 | 1,413,410 | 29 | 0 | 2  | no  | TE |
| at_locus.02546 | 2 | 1,425,159 | 1,425,408 | 7  | 0 | 2  | yes | TE |
| at_locus.02547 | 2 | 1,442,550 | 1,442,619 | 17 | 1 | 6  | no  | TE |
| at_locus.02548 | 2 | 1,459,119 | 1,459,344 | 17 | 0 | 0  | no  | TE |
| at_locus.02549 | 2 | 1,459,737 | 1,460,089 | 15 | 0 | 1  | yes | TE |
| at_locus.02550 | 2 | 1,460,837 | 1,460,922 | 11 | 0 | 0  | no  | TE |
| at_locus.02551 | 2 | 1,466,833 | 1,466,878 | 14 | 0 | 0  | yes | TE |
| at_locus.02552 | 2 | 1,472,847 | 1,473,204 | 8  | 0 | 5  | yes |    |
| at_locus.02553 | 2 | 1,483,731 | 1,484,213 | 19 | 0 | 10 | yes |    |
| at_locus.02554 | 2 | 1,500,388 | 1,500,664 | 11 | 0 | 2  | yes |    |
| at_locus.02555 | 2 | 1,508,542 | 1,509,314 | 13 | 0 | 9  | yes | TE |
| at_locus.02556 | 2 | 1,510,592 | 1,510,713 | 4  | 0 | 0  | yes | TE |
| at_locus.02557 | 2 | 1,511,723 | 1,511,910 | 1  | 2 | 5  | no  | TE |
| at_locus.02558 | 2 | 1,512,238 | 1,512,528 | 1  | 0 | 6  | no  | TE |
| at_locus.02559 | 2 | 1,512,825 | 1,513,138 | 1  | 0 | 5  | no  | TE |
| at_locus.02560 | 2 | 1,546,489 | 1,546,709 | 6  | 0 | 0  | yes | TE |
| at_locus.02561 | 2 | 1,552,785 | 1,553,072 | 4  | 0 | 1  | yes | TE |
| at_locus.02562 | 2 | 1,579,325 | 1,580,032 | 12 | 1 | 15 | yes | TE |
| at_locus.02563 | 2 | 1,587,378 | 1,587,469 | 12 | 0 | 0  | yes | TE |
| at_locus.02564 | 2 | 1,597,263 | 1,597,361 | 10 | 0 | 0  | no  | TE |
| at_locus.02565 | 2 | 1,608,242 | 1,608,274 | 4  | 0 | 0  | no  | TE |
| at_locus.02566 | 2 | 1,609,081 | 1,609,148 | 6  | 0 | 0  | no  | TE |
| at_locus.02567 | 2 | 1,614,599 | 1,615,004 | 19 | 0 | 6  | yes | TE |
| at_locus.02568 | 2 | 1,616,045 | 1,617,311 | 34 | 0 | 14 | yes | TE |
| at_locus.02569 | 2 | 1,617,762 | 1,617,944 | 35 | 1 | 6  | yes | TE |

|                |   |           |           |    |   |    |     |    |
|----------------|---|-----------|-----------|----|---|----|-----|----|
| at_locus.02570 | 2 | 1,618,176 | 1,618,250 | 5  | 0 | 0  | no  | TE |
| at_locus.02571 | 2 | 1,629,496 | 1,630,807 | 61 | 3 | 9  | yes | TE |
| at_locus.02572 | 2 | 1,631,069 | 1,631,275 | 4  | 1 | 2  | no  | TE |
| at_locus.02573 | 2 | 1,631,496 | 1,633,970 | 41 | 0 | 61 | yes | TE |
| at_locus.02574 | 2 | 1,634,144 | 1,637,417 | 97 | 2 | 78 | yes | TE |
| at_locus.02575 | 2 | 1,652,399 | 1,652,726 | 4  | 0 | 0  | yes | TE |
| at_locus.02576 | 2 | 1,667,756 | 1,667,950 | 0  | 0 | 4  | yes | TE |
| at_locus.02577 | 2 | 1,669,904 | 1,670,274 | 11 | 0 | 2  | no  | TE |
| at_locus.02578 | 2 | 1,676,234 | 1,676,461 | 11 | 0 | 0  | yes | TE |
| at_locus.02579 | 2 | 1,681,226 | 1,681,486 | 7  | 0 | 1  | yes | TE |
| at_locus.02580 | 2 | 1,695,927 | 1,695,995 | 30 | 0 | 0  | yes |    |
| at_locus.02581 | 2 | 1,701,819 | 1,701,906 | 7  | 0 | 0  | yes | TE |
| at_locus.02582 | 2 | 1,709,559 | 1,709,774 | 12 | 0 | 0  | yes | TE |
| at_locus.02583 | 2 | 1,740,953 | 1,741,703 | 22 | 0 | 23 | yes | TE |
| at_locus.02584 | 2 | 1,741,941 | 1,742,410 | 9  | 0 | 3  | yes | TE |
| at_locus.02585 | 2 | 1,746,248 | 1,746,284 | 1  | 0 | 5  | no  | TE |
| at_locus.02586 | 2 | 1,746,707 | 1,746,861 | 4  | 0 | 2  | yes | TE |
| at_locus.02587 | 2 | 1,747,694 | 1,748,852 | 7  | 0 | 9  | no  | TE |
| at_locus.02588 | 2 | 1,751,022 | 1,751,450 | 9  | 0 | 1  | no  | TE |
| at_locus.02589 | 2 | 1,751,976 | 1,752,191 | 6  | 0 | 1  | no  | TE |
| at_locus.02590 | 2 | 1,752,438 | 1,752,903 | 9  | 1 | 6  | no  | TE |
| at_locus.02591 | 2 | 1,755,559 | 1,755,711 | 3  | 0 | 5  | no  | TE |
| at_locus.02592 | 2 | 1,756,247 | 1,757,019 | 47 | 0 | 27 | no  | TE |
| at_locus.02593 | 2 | 1,759,611 | 1,759,794 | 0  | 0 | 4  | no  | TE |
| at_locus.02594 | 2 | 1,760,955 | 1,761,000 | 4  | 0 | 0  | no  | TE |
| at_locus.02595 | 2 | 1,763,092 | 1,763,258 | 0  | 0 | 4  | no  | TE |
| at_locus.02596 | 2 | 1,766,452 | 1,766,492 | 5  | 0 | 2  | no  | TE |
| at_locus.02597 | 2 | 1,771,926 | 1,772,100 | 0  | 0 | 2  | no  |    |
| at_locus.02598 | 2 | 1,777,883 | 1,778,126 | 4  | 0 | 1  | no  | TE |
| at_locus.02599 | 2 | 1,779,119 | 1,779,476 | 6  | 0 | 4  | yes | TE |
| at_locus.02600 | 2 | 1,779,767 | 1,779,797 | 25 | 0 | 4  | yes |    |
| at_locus.02601 | 2 | 1,796,964 | 1,797,061 | 4  | 0 | 0  | no  |    |
| at_locus.02602 | 2 | 1,821,614 | 1,821,691 | 5  | 0 | 0  | yes | TE |
| at_locus.02603 | 2 | 1,832,070 | 1,832,093 | 5  | 0 | 1  | yes | TE |
| at_locus.02604 | 2 | 1,838,711 | 1,838,965 | 6  | 0 | 1  | yes |    |
| at_locus.02605 | 2 | 1,839,186 | 1,839,428 | 4  | 0 | 1  | yes |    |
| at_locus.02606 | 2 | 1,840,616 | 1,840,893 | 5  | 0 | 2  | yes |    |

|                |   |           |           |     |   |    |     |    |
|----------------|---|-----------|-----------|-----|---|----|-----|----|
| at_locus.02607 | 2 | 1,847,764 | 1,848,164 | 10  | 0 | 13 | yes | TE |
| at_locus.02608 | 2 | 1,850,309 | 1,850,370 | 8   | 0 | 0  | yes | TE |
| at_locus.02609 | 2 | 1,850,868 | 1,851,154 | 8   | 0 | 0  | no  | TE |
| at_locus.02610 | 2 | 1,855,081 | 1,855,128 | 4   | 0 | 0  | yes | TE |
| at_locus.02611 | 2 | 1,857,708 | 1,857,957 | 7   | 1 | 1  | yes | TE |
| at_locus.02612 | 2 | 1,881,507 | 1,881,775 | 4   | 0 | 0  | yes |    |
| at_locus.02613 | 2 | 1,882,832 | 1,883,228 | 7   | 0 | 4  | no  | TE |
| at_locus.02614 | 2 | 1,883,471 | 1,883,766 | 0   | 0 | 4  | yes |    |
| at_locus.02615 | 2 | 1,887,269 | 1,887,665 | 7   | 0 | 4  | no  | TE |
| at_locus.02616 | 2 | 1,888,719 | 1,888,962 | 4   | 0 | 1  | no  | TE |
| at_locus.02617 | 2 | 1,889,961 | 1,890,410 | 9   | 0 | 0  | yes | TE |
| at_locus.02618 | 2 | 1,897,902 | 1,897,926 | 7   | 0 | 0  | no  |    |
| at_locus.02619 | 2 | 1,905,403 | 1,905,427 | 7   | 0 | 0  | no  |    |
| at_locus.02620 | 2 | 1,926,958 | 1,927,702 | 79  | 4 | 88 | yes |    |
| at_locus.02621 | 2 | 1,928,052 | 1,928,639 | 172 | 3 | 66 | yes |    |
| at_locus.02622 | 2 | 1,943,073 | 1,943,137 | 8   | 0 | 0  | yes | TE |
| at_locus.02623 | 2 | 1,947,904 | 1,948,063 | 9   | 0 | 0  | no  | TE |
| at_locus.02624 | 2 | 1,948,432 | 1,948,517 | 6   | 0 | 0  | yes | TE |
| at_locus.02625 | 2 | 1,955,467 | 1,955,509 | 4   | 0 | 0  | no  | TE |
| at_locus.02626 | 2 | 1,963,080 | 1,963,191 | 7   | 0 | 0  | no  | TE |
| at_locus.02627 | 2 | 1,968,861 | 1,968,901 | 4   | 0 | 0  | no  | TE |
| at_locus.02628 | 2 | 1,982,800 | 1,983,068 | 10  | 0 | 2  | yes | TE |
| at_locus.02629 | 2 | 2,006,908 | 2,007,049 | 0   | 0 | 5  | no  | TE |
| at_locus.02630 | 2 | 2,007,801 | 2,007,851 | 4   | 0 | 0  | no  | TE |
| at_locus.02631 | 2 | 2,008,078 | 2,008,422 | 4   | 0 | 6  | no  | TE |
| at_locus.02632 | 2 | 2,009,188 | 2,009,735 | 17  | 0 | 13 | no  | TE |
| at_locus.02633 | 2 | 2,009,981 | 2,010,054 | 5   | 0 | 0  | no  | TE |
| at_locus.02634 | 2 | 2,035,069 | 2,035,196 | 5   | 1 | 0  | yes | TE |
| at_locus.02635 | 2 | 2,042,264 | 2,043,009 | 15  | 0 | 23 | no  | TE |
| at_locus.02636 | 2 | 2,043,057 | 2,043,342 | 5   | 0 | 0  | no  | TE |
| at_locus.02637 | 2 | 2,044,077 | 2,044,189 | 1   | 0 | 4  | no  | TE |
| at_locus.02638 | 2 | 2,045,969 | 2,046,524 | 5   | 0 | 5  | yes | TE |
| at_locus.02639 | 2 | 2,046,923 | 2,047,498 | 4   | 0 | 9  | no  | TE |
| at_locus.02640 | 2 | 2,048,529 | 2,049,070 | 0   | 0 | 9  | no  | TE |
| at_locus.02641 | 2 | 2,049,279 | 2,049,989 | 2   | 0 | 9  | no  | TE |
| at_locus.02642 | 2 | 2,051,115 | 2,051,740 | 7   | 0 | 9  | no  | TE |
| at_locus.02643 | 2 | 2,051,886 | 2,052,286 | 5   | 0 | 7  | no  | TE |

|                |   |           |           |    |   |    |     |    |
|----------------|---|-----------|-----------|----|---|----|-----|----|
| at_locus.02644 | 2 | 2,052,685 | 2,053,017 | 9  | 0 | 8  | no  | TE |
| at_locus.02645 | 2 | 2,053,206 | 2,053,658 | 4  | 0 | 14 | no  | TE |
| at_locus.02646 | 2 | 2,053,813 | 2,054,180 | 7  | 0 | 0  | no  | TE |
| at_locus.02647 | 2 | 2,058,826 | 2,058,854 | 4  | 0 | 0  | no  | TE |
| at_locus.02648 | 2 | 2,059,144 | 2,059,220 | 5  | 0 | 0  | yes | TE |
| at_locus.02649 | 2 | 2,061,098 | 2,061,772 | 8  | 0 | 1  | yes | TE |
| at_locus.02650 | 2 | 2,063,888 | 2,064,006 | 5  | 1 | 0  | yes |    |
| at_locus.02651 | 2 | 2,064,748 | 2,066,380 | 38 | 0 | 11 | yes | TE |
| at_locus.02652 | 2 | 2,074,250 | 2,074,885 | 14 | 2 | 13 | yes | TE |
| at_locus.02653 | 2 | 2,078,842 | 2,078,865 | 5  | 0 | 1  | yes | TE |
| at_locus.02654 | 2 | 2,085,882 | 2,086,013 | 10 | 0 | 0  | no  | TE |
| at_locus.02655 | 2 | 2,086,327 | 2,086,457 | 8  | 0 | 2  | yes | TE |
| at_locus.02656 | 2 | 2,138,817 | 2,138,890 | 5  | 0 | 0  | no  | TE |
| at_locus.02657 | 2 | 2,139,103 | 2,139,380 | 4  | 0 | 0  | no  | TE |
| at_locus.02658 | 2 | 2,140,481 | 2,140,517 | 5  | 0 | 0  | no  | TE |
| at_locus.02659 | 2 | 2,140,934 | 2,140,972 | 8  | 0 | 2  | no  | TE |
| at_locus.02660 | 2 | 2,148,402 | 2,148,866 | 10 | 0 | 0  | yes |    |
| at_locus.02661 | 2 | 2,149,961 | 2,150,862 | 28 | 2 | 2  | no  | TE |
| at_locus.02662 | 2 | 2,152,723 | 2,153,408 | 16 | 0 | 2  | no  |    |
| at_locus.02663 | 2 | 2,154,902 | 2,155,410 | 8  | 0 | 1  | yes | TE |
| at_locus.02664 | 2 | 2,155,627 | 2,155,851 | 5  | 0 | 4  | yes | TE |
| at_locus.02665 | 2 | 2,156,194 | 2,156,228 | 5  | 0 | 0  | yes |    |
| at_locus.02666 | 2 | 2,158,037 | 2,158,722 | 19 | 0 | 3  | yes |    |
| at_locus.02667 | 2 | 2,160,414 | 2,160,807 | 9  | 0 | 3  | yes |    |
| at_locus.02668 | 2 | 2,162,301 | 2,162,637 | 26 | 0 | 1  | yes | TE |
| at_locus.02669 | 2 | 2,169,341 | 2,169,597 | 5  | 0 | 2  | yes |    |
| at_locus.02670 | 2 | 2,178,617 | 2,178,695 | 7  | 0 | 0  | yes |    |
| at_locus.02672 | 2 | 2,191,820 | 2,192,420 | 0  | 0 | 4  | yes | TE |
| at_locus.02673 | 2 | 2,209,969 | 2,210,107 | 9  | 0 | 1  | no  | TE |
| at_locus.02674 | 2 | 2,217,482 | 2,217,700 | 9  | 1 | 0  | yes | TE |
| at_locus.02675 | 2 | 2,217,856 | 2,218,430 | 3  | 1 | 9  | yes | TE |
| at_locus.02676 | 2 | 2,218,652 | 2,219,039 | 4  | 0 | 6  | yes | TE |
| at_locus.02677 | 2 | 2,220,425 | 2,220,770 | 4  | 0 | 8  | yes | TE |
| at_locus.02678 | 2 | 2,221,948 | 2,222,360 | 7  | 1 | 23 | yes | TE |
| at_locus.02679 | 2 | 2,222,837 | 2,223,069 | 8  | 0 | 5  | yes |    |
| at_locus.02680 | 2 | 2,223,292 | 2,223,626 | 6  | 0 | 0  | yes |    |
| at_locus.02681 | 2 | 2,224,422 | 2,225,835 | 66 | 3 | 60 | yes | TE |

|                |   |           |           |    |   |    |     |    |
|----------------|---|-----------|-----------|----|---|----|-----|----|
| at_locus.02682 | 2 | 2,226,127 | 2,226,242 | 4  | 0 | 0  | yes |    |
| at_locus.02683 | 2 | 2,226,692 | 2,226,796 | 4  | 0 | 1  | yes |    |
| at_locus.02684 | 2 | 2,232,307 | 2,232,388 | 16 | 0 | 0  | yes | TE |
| at_locus.02685 | 2 | 2,233,122 | 2,233,341 | 9  | 0 | 0  | yes | TE |
| at_locus.02686 | 2 | 2,240,316 | 2,241,179 | 30 | 0 | 2  | yes | TE |
| at_locus.02687 | 2 | 2,247,642 | 2,248,110 | 1  | 0 | 4  | no  | TE |
| at_locus.02688 | 2 | 2,249,123 | 2,249,960 | 16 | 1 | 18 | yes | TE |
| at_locus.02689 | 2 | 2,251,647 | 2,251,834 | 4  | 0 | 1  | no  | TE |
| at_locus.02690 | 2 | 2,252,473 | 2,252,872 | 7  | 0 | 13 | no  | TE |
| at_locus.02691 | 2 | 2,260,716 | 2,260,930 | 13 | 0 | 1  | yes | TE |
| at_locus.02692 | 2 | 2,262,321 | 2,262,402 | 6  | 0 | 0  | yes | TE |
| at_locus.02693 | 2 | 2,263,956 | 2,264,568 | 4  | 0 | 8  | yes |    |
| at_locus.02694 | 2 | 2,273,820 | 2,274,011 | 8  | 0 | 0  | yes |    |
| at_locus.02695 | 2 | 2,274,245 | 2,274,737 | 12 | 0 | 3  | yes | TE |
| at_locus.02696 | 2 | 2,279,125 | 2,280,033 | 10 | 0 | 7  | no  | TE |
| at_locus.02697 | 2 | 2,284,204 | 2,284,505 | 7  | 0 | 1  | yes | TE |
| at_locus.02698 | 2 | 2,297,114 | 2,297,196 | 15 | 0 | 0  | no  | TE |
| at_locus.02699 | 2 | 2,297,525 | 2,297,616 | 4  | 0 | 0  | no  | TE |
| at_locus.02700 | 2 | 2,299,090 | 2,299,554 | 11 | 0 | 0  | yes | TE |
| at_locus.02701 | 2 | 2,320,061 | 2,320,088 | 4  | 0 | 0  | no  | TE |
| at_locus.02702 | 2 | 2,320,780 | 2,320,929 | 13 | 0 | 0  | no  | TE |
| at_locus.02703 | 2 | 2,321,225 | 2,321,850 | 13 | 0 | 1  | yes | TE |
| at_locus.02704 | 2 | 2,356,106 | 2,356,248 | 4  | 0 | 0  | yes |    |
| at_locus.02705 | 2 | 2,356,412 | 2,357,799 | 22 | 0 | 25 | yes |    |
| at_locus.02706 | 2 | 2,373,760 | 2,373,930 | 4  | 0 | 0  | no  | TE |
| at_locus.02707 | 2 | 2,374,686 | 2,374,952 | 4  | 0 | 4  | no  | TE |
| at_locus.02708 | 2 | 2,375,653 | 2,376,056 | 0  | 0 | 5  | yes | TE |
| at_locus.02709 | 2 | 2,380,572 | 2,381,044 | 0  | 0 | 4  | yes | TE |
| at_locus.02710 | 2 | 2,401,326 | 2,402,198 | 15 | 0 | 11 | yes | TE |
| at_locus.02711 | 2 | 2,402,435 | 2,402,962 | 7  | 1 | 4  | no  | TE |
| at_locus.02712 | 2 | 2,407,751 | 2,407,826 | 0  | 0 | 4  | no  | TE |
| at_locus.02713 | 2 | 2,408,518 | 2,408,796 | 4  | 0 | 5  | no  | TE |
| at_locus.02714 | 2 | 2,443,767 | 2,443,886 | 13 | 0 | 0  | no  | TE |
| at_locus.02715 | 2 | 2,446,454 | 2,446,634 | 10 | 0 | 1  | yes |    |
| at_locus.02716 | 2 | 2,447,755 | 2,447,948 | 4  | 0 | 6  | no  | TE |
| at_locus.02717 | 2 | 2,448,227 | 2,449,299 | 15 | 1 | 21 | yes | TE |
| at_locus.02718 | 2 | 2,449,519 | 2,451,798 | 47 | 1 | 53 | yes | TE |



|                |   |           |           |    |   |    |     |    |
|----------------|---|-----------|-----------|----|---|----|-----|----|
| at_locus.02719 | 2 | 2,452,052 | 2,452,219 | 10 | 0 | 6  | no  | TE |
| at_locus.02720 | 2 | 2,452,916 | 2,454,136 | 19 | 0 | 37 | no  | TE |
| at_locus.02721 | 2 | 2,460,830 | 2,460,975 | 2  | 0 | 5  | yes | TE |
| at_locus.02722 | 2 | 2,487,121 | 2,487,386 | 3  | 0 | 4  | no  | TE |
| at_locus.02723 | 2 | 2,487,794 | 2,487,983 | 5  | 0 | 4  | no  | TE |
| at_locus.02724 | 2 | 2,488,254 | 2,488,288 | 1  | 0 | 7  | no  | TE |
| at_locus.02725 | 2 | 2,488,490 | 2,489,388 | 18 | 4 | 26 | no  | TE |
| at_locus.02726 | 2 | 2,490,271 | 2,490,640 | 6  | 1 | 6  | no  | TE |
| at_locus.02727 | 2 | 2,491,369 | 2,491,867 | 8  | 0 | 5  | no  | TE |
| at_locus.02728 | 2 | 2,492,684 | 2,493,001 | 3  | 0 | 4  | no  | TE |
| at_locus.02729 | 2 | 2,493,493 | 2,493,829 | 4  | 0 | 8  | no  | TE |
| at_locus.02730 | 2 | 2,494,061 | 2,494,355 | 1  | 0 | 4  | no  | TE |
| at_locus.02731 | 2 | 2,497,228 | 2,497,456 | 2  | 0 | 8  | no  | TE |
| at_locus.02732 | 2 | 2,497,668 | 2,498,224 | 9  | 0 | 14 | no  | TE |
| at_locus.02733 | 2 | 2,498,473 | 2,499,108 | 15 | 0 | 14 | no  | TE |
| at_locus.02734 | 2 | 2,499,342 | 2,500,530 | 19 | 4 | 22 | no  | TE |
| at_locus.02735 | 2 | 2,503,064 | 2,503,489 | 2  | 0 | 5  | yes | TE |
| at_locus.02736 | 2 | 2,510,713 | 2,511,219 | 12 | 0 | 4  | no  | TE |
| at_locus.02737 | 2 | 2,516,640 | 2,516,977 | 0  | 0 | 5  | yes | TE |
| at_locus.02738 | 2 | 2,520,471 | 2,521,162 | 8  | 0 | 8  | yes | TE |
| at_locus.02739 | 2 | 2,521,528 | 2,522,007 | 14 | 0 | 24 | yes |    |
| at_locus.02740 | 2 | 2,522,021 | 2,522,380 | 30 | 1 | 15 | yes |    |
| at_locus.02741 | 2 | 2,523,678 | 2,523,703 | 4  | 0 | 0  | no  | TE |
| at_locus.02742 | 2 | 2,525,589 | 2,526,038 | 1  | 0 | 4  | yes | TE |
| at_locus.02743 | 2 | 2,535,378 | 2,535,810 | 10 | 0 | 3  | no  | TE |
| at_locus.02744 | 2 | 2,536,115 | 2,536,231 | 1  | 0 | 4  | yes |    |
| at_locus.02745 | 2 | 2,537,524 | 2,537,979 | 4  | 0 | 21 | yes |    |
| at_locus.02746 | 2 | 2,538,831 | 2,539,281 | 4  | 0 | 8  | yes | TE |
| at_locus.02747 | 2 | 2,541,859 | 2,542,039 | 5  | 0 | 2  | yes | TE |
| at_locus.02748 | 2 | 2,542,276 | 2,542,396 | 5  | 0 | 1  | yes |    |
| at_locus.02749 | 2 | 2,542,681 | 2,543,476 | 23 | 0 | 27 | no  | TE |
| at_locus.02750 | 2 | 2,544,016 | 2,544,168 | 3  | 0 | 5  | no  | TE |
| at_locus.02751 | 2 | 2,546,948 | 2,547,324 | 9  | 1 | 4  | no  | TE |
| at_locus.02752 | 2 | 2,547,780 | 2,547,803 | 5  | 0 | 0  | no  | TE |
| at_locus.02753 | 2 | 2,548,329 | 2,548,503 | 8  | 0 | 0  | no  | TE |
| at_locus.02754 | 2 | 2,548,881 | 2,549,310 | 3  | 0 | 1  | no  | TE |
| at_locus.02755 | 2 | 2,551,477 | 2,553,061 | 7  | 0 | 10 | no  | TE |

|                |   |           |           |     |   |     |     |    |
|----------------|---|-----------|-----------|-----|---|-----|-----|----|
| at_locus.02756 | 2 | 2,553,617 | 2,553,998 | 5   | 0 | 1   | no  | TE |
| at_locus.02757 | 2 | 2,554,416 | 2,554,452 | 1   | 0 | 5   | no  | TE |
| at_locus.02758 | 2 | 2,556,419 | 2,556,680 | 4   | 0 | 2   | no  | TE |
| at_locus.02759 | 2 | 2,558,288 | 2,558,841 | 8   | 0 | 2   | no  | TE |
| at_locus.02760 | 2 | 2,559,054 | 2,559,341 | 4   | 0 | 11  | no  | TE |
| at_locus.02761 | 2 | 2,562,475 | 2,562,499 | 4   | 0 | 0   | no  | TE |
| at_locus.02762 | 2 | 2,563,188 | 2,564,198 | 16  | 2 | 16  | no  | TE |
| at_locus.02763 | 2 | 2,564,766 | 2,565,044 | 4   | 0 | 3   | no  | TE |
| at_locus.02764 | 2 | 2,565,467 | 2,565,645 | 4   | 1 | 2   | no  | TE |
| at_locus.02765 | 2 | 2,568,997 | 2,569,383 | 2   | 0 | 6   | no  | TE |
| at_locus.02766 | 2 | 2,569,673 | 2,570,532 | 21  | 2 | 17  | no  | TE |
| at_locus.02767 | 2 | 2,576,435 | 2,577,025 | 20  | 0 | 9   | no  | TE |
| at_locus.02768 | 2 | 2,577,273 | 2,578,425 | 26  | 0 | 25  | yes | TE |
| at_locus.02769 | 2 | 2,580,470 | 2,580,490 | 4   | 0 | 0   | yes |    |
| at_locus.02770 | 2 | 2,600,737 | 2,601,075 | 1   | 0 | 12  | yes |    |
| at_locus.02771 | 2 | 2,601,312 | 2,601,624 | 1   | 0 | 13  | yes |    |
| at_locus.02772 | 2 | 2,602,653 | 2,603,629 | 13  | 0 | 24  | yes | TE |
| at_locus.02773 | 2 | 2,603,962 | 2,606,266 | 172 | 3 | 254 | yes |    |
| at_locus.02774 | 2 | 2,606,409 | 2,606,878 | 25  | 0 | 24  | yes |    |
| at_locus.02775 | 2 | 2,607,597 | 2,608,079 | 12  | 1 | 3   | yes |    |
| at_locus.02776 | 2 | 2,608,941 | 2,609,103 | 4   | 0 | 3   | yes |    |
| at_locus.02777 | 2 | 2,622,186 | 2,622,352 | 4   | 0 | 2   | no  | TE |
| at_locus.02778 | 2 | 2,622,786 | 2,623,829 | 15  | 1 | 21  | no  | TE |
| at_locus.02779 | 2 | 2,639,580 | 2,640,091 | 14  | 0 | 9   | no  | TE |
| at_locus.02780 | 2 | 2,641,033 | 2,641,247 | 2   | 0 | 5   | no  | TE |
| at_locus.02781 | 2 | 2,641,478 | 2,641,750 | 4   | 0 | 1   | yes | TE |
| at_locus.02782 | 2 | 2,652,102 | 2,652,244 | 0   | 0 | 6   | no  |    |
| at_locus.02783 | 2 | 2,654,290 | 2,655,036 | 20  | 0 | 5   | no  | TE |
| at_locus.02784 | 2 | 2,667,292 | 2,667,770 | 15  | 0 | 10  | no  | TE |
| at_locus.02785 | 2 | 2,668,258 | 2,668,508 | 4   | 0 | 5   | no  | TE |
| at_locus.02786 | 2 | 2,669,505 | 2,669,792 | 0   | 0 | 7   | no  | TE |
| at_locus.02787 | 2 | 2,683,287 | 2,683,983 | 8   | 0 | 4   | no  | TE |
| at_locus.02788 | 2 | 2,688,648 | 2,688,980 | 7   | 0 | 3   | no  | TE |
| at_locus.02789 | 2 | 2,692,669 | 2,692,847 | 12  | 0 | 0   | no  | TE |
| at_locus.02790 | 2 | 2,700,138 | 2,700,349 | 4   | 0 | 0   | no  | TE |
| at_locus.02791 | 2 | 2,707,368 | 2,708,069 | 26  | 0 | 9   | no  | TE |
| at_locus.02792 | 2 | 2,708,451 | 2,708,721 | 2   | 0 | 4   | no  | TE |

|                |   |           |           |     |    |     |     |    |
|----------------|---|-----------|-----------|-----|----|-----|-----|----|
| at_locus.02793 | 2 | 2,718,951 | 2,719,162 | 5   | 0  | 2   | no  | TE |
| at_locus.02794 | 2 | 2,722,271 | 2,722,758 | 1   | 0  | 9   | no  | TE |
| at_locus.02795 | 2 | 2,730,744 | 2,731,585 | 1   | 0  | 14  | yes | TE |
| at_locus.02796 | 2 | 2,746,556 | 2,746,890 | 4   | 0  | 2   | no  | TE |
| at_locus.02797 | 2 | 2,771,571 | 2,772,084 | 10  | 0  | 3   | no  | TE |
| at_locus.02798 | 2 | 2,781,593 | 2,781,624 | 10  | 0  | 0   | no  | TE |
| at_locus.02799 | 2 | 2,786,435 | 2,786,617 | 4   | 0  | 1   | no  | TE |
| at_locus.02800 | 2 | 2,786,701 | 2,787,391 | 5   | 0  | 10  | no  | TE |
| at_locus.02801 | 2 | 2,792,827 | 2,792,965 | 5   | 0  | 6   | no  | TE |
| at_locus.02802 | 2 | 2,806,912 | 2,807,152 | 0   | 4  | 0   | no  |    |
| at_locus.02803 | 2 | 2,820,532 | 2,820,828 | 5   | 0  | 1   | no  |    |
| at_locus.02804 | 2 | 2,827,861 | 2,827,921 | 3   | 0  | 4   | no  | TE |
| at_locus.02805 | 2 | 2,828,321 | 2,828,487 | 0   | 0  | 4   | no  | TE |
| at_locus.02806 | 2 | 2,828,849 | 2,829,304 | 5   | 0  | 3   | yes | TE |
| at_locus.02807 | 2 | 2,829,613 | 2,829,826 | 2   | 0  | 4   | no  | TE |
| at_locus.02808 | 2 | 2,830,615 | 2,831,491 | 5   | 0  | 9   | yes | TE |
| at_locus.02809 | 2 | 2,839,997 | 2,840,193 | 1   | 0  | 4   | no  | TE |
| at_locus.02810 | 2 | 2,843,149 | 2,843,168 | 0   | 4  | 0   | yes |    |
| at_locus.02811 | 2 | 2,852,129 | 2,852,167 | 5   | 0  | 0   | yes | TE |
| at_locus.02812 | 2 | 2,855,716 | 2,856,253 | 23  | 0  | 2   | no  | TE |
| at_locus.02813 | 2 | 2,856,664 | 2,857,339 | 6   | 0  | 7   | yes | TE |
| at_locus.02814 | 2 | 2,865,369 | 2,866,439 | 273 | 8  | 200 | yes |    |
| at_locus.02815 | 2 | 2,866,642 | 2,867,057 | 596 | 15 | 352 | yes |    |
| at_locus.02816 | 2 | 2,867,687 | 2,867,928 | 32  | 0  | 14  | yes | TE |
| at_locus.02817 | 2 | 2,872,429 | 2,873,245 | 2   | 0  | 12  | no  | TE |
| at_locus.02818 | 2 | 2,874,430 | 2,874,711 | 0   | 0  | 5   | no  | TE |
| at_locus.02819 | 2 | 2,876,129 | 2,877,047 | 9   | 1  | 12  | yes | TE |
| at_locus.02820 | 2 | 2,881,780 | 2,882,266 | 8   | 0  | 10  | no  | TE |
| at_locus.02821 | 2 | 2,890,828 | 2,891,049 | 6   | 0  | 10  | yes |    |
| at_locus.02822 | 2 | 2,892,221 | 2,892,292 | 28  | 36 | 17  | no  |    |
| at_locus.02823 | 2 | 2,904,401 | 2,904,588 | 4   | 0  | 0   | no  | TE |
| at_locus.02824 | 2 | 2,932,531 | 2,932,653 | 2   | 0  | 7   | yes | TE |
| at_locus.02825 | 2 | 2,936,395 | 2,936,629 | 0   | 0  | 4   | yes | TE |
| at_locus.02826 | 2 | 2,947,960 | 2,948,269 | 4   | 0  | 1   | yes |    |
| at_locus.02827 | 2 | 2,950,902 | 2,951,004 | 5   | 0  | 0   | yes |    |
| at_locus.02828 | 2 | 2,951,616 | 2,951,850 | 5   | 0  | 3   | yes |    |
| at_locus.02829 | 2 | 2,961,537 | 2,961,768 | 7   | 1  | 0   | yes | TE |

|                |   |           |           |    |   |    |     |    |
|----------------|---|-----------|-----------|----|---|----|-----|----|
| at_locus.02830 | 2 | 2,962,580 | 2,962,802 | 11 | 0 | 0  | no  | TE |
| at_locus.02831 | 2 | 2,963,222 | 2,963,424 | 7  | 0 | 5  | yes | TE |
| at_locus.02832 | 2 | 2,963,557 | 2,964,172 | 67 | 1 | 1  | yes | TE |
| at_locus.02833 | 2 | 2,965,470 | 2,965,630 | 4  | 0 | 2  | no  | TE |
| at_locus.02834 | 2 | 2,965,853 | 2,966,184 | 5  | 0 | 2  | yes | TE |
| at_locus.02835 | 2 | 2,985,216 | 2,985,271 | 4  | 0 | 0  | yes |    |
| at_locus.02836 | 2 | 3,013,503 | 3,014,844 | 30 | 0 | 34 | yes | TE |
| at_locus.02837 | 2 | 3,015,046 | 3,015,660 | 8  | 0 | 4  | yes | TE |
| at_locus.02838 | 2 | 3,017,523 | 3,017,784 | 4  | 0 | 2  | no  | TE |
| at_locus.02839 | 2 | 3,019,826 | 3,019,862 | 1  | 0 | 5  | no  | TE |
| at_locus.02840 | 2 | 3,020,337 | 3,020,661 | 5  | 0 | 1  | no  | TE |
| at_locus.02841 | 2 | 3,020,744 | 3,021,117 | 2  | 0 | 5  | no  | TE |
| at_locus.02842 | 2 | 3,021,504 | 3,022,947 | 17 | 0 | 24 | yes | TE |
| at_locus.02843 | 2 | 3,023,441 | 3,023,609 | 7  | 0 | 1  | yes | TE |
| at_locus.02844 | 2 | 3,058,084 | 3,058,395 | 4  | 0 | 1  | yes | TE |
| at_locus.02845 | 2 | 3,061,099 | 3,061,443 | 11 | 0 | 1  | yes | TE |
| at_locus.02846 | 2 | 3,061,857 | 3,062,109 | 7  | 0 | 6  | yes | TE |
| at_locus.02847 | 2 | 3,065,898 | 3,066,223 | 3  | 0 | 7  | no  | TE |
| at_locus.02848 | 2 | 3,066,640 | 3,066,793 | 1  | 0 | 5  | no  | TE |
| at_locus.02849 | 2 | 3,070,956 | 3,071,326 | 0  | 0 | 5  | no  | TE |
| at_locus.02850 | 2 | 3,076,989 | 3,077,065 | 0  | 0 | 4  | no  | TE |
| at_locus.02851 | 2 | 3,080,425 | 3,080,523 | 3  | 0 | 4  | yes | TE |
| at_locus.02852 | 2 | 3,097,227 | 3,097,304 | 0  | 0 | 5  | no  | TE |
| at_locus.02853 | 2 | 3,102,582 | 3,102,657 | 0  | 0 | 6  | no  | TE |
| at_locus.02854 | 2 | 3,102,771 | 3,103,016 | 4  | 0 | 0  | yes | TE |
| at_locus.02855 | 2 | 3,105,098 | 3,105,381 | 12 | 0 | 3  | no  | TE |
| at_locus.02856 | 2 | 3,110,950 | 3,111,003 | 0  | 0 | 5  | yes | TE |
| at_locus.02857 | 2 | 3,111,252 | 3,111,289 | 9  | 0 | 0  | yes | TE |
| at_locus.02858 | 2 | 3,111,699 | 3,111,771 | 9  | 0 | 0  | yes | TE |
| at_locus.02859 | 2 | 3,116,187 | 3,116,450 | 4  | 0 | 0  | yes | TE |
| at_locus.02860 | 2 | 3,117,751 | 3,118,032 | 5  | 0 | 0  | yes |    |
| at_locus.02861 | 2 | 3,119,933 | 3,120,478 | 0  | 0 | 5  | yes | TE |
| at_locus.02862 | 2 | 3,144,091 | 3,144,399 | 0  | 0 | 4  | no  | TE |
| at_locus.02863 | 2 | 3,175,150 | 3,175,231 | 5  | 0 | 0  | yes |    |
| at_locus.02864 | 2 | 3,187,590 | 3,187,804 | 4  | 0 | 1  | no  | TE |
| at_locus.02865 | 2 | 3,191,132 | 3,191,276 | 4  | 0 | 1  | no  | TE |
| at_locus.02866 | 2 | 3,191,487 | 3,191,524 | 11 | 0 | 1  | no  | TE |

|                |   |           |           |    |    |    |     |    |
|----------------|---|-----------|-----------|----|----|----|-----|----|
| at_locus.02867 | 2 | 3,194,336 | 3,195,559 | 17 | 0  | 7  | no  | TE |
| at_locus.02868 | 2 | 3,196,408 | 3,196,437 | 4  | 0  | 0  | no  | TE |
| at_locus.02869 | 2 | 3,197,713 | 3,197,829 | 16 | 0  | 0  | no  | TE |
| at_locus.02870 | 2 | 3,198,470 | 3,198,497 | 4  | 0  | 0  | no  | TE |
| at_locus.02871 | 2 | 3,213,099 | 3,213,351 | 11 | 0  | 0  | no  | TE |
| at_locus.02872 | 2 | 3,225,920 | 3,226,779 | 14 | 2  | 13 | no  | TE |
| at_locus.02873 | 2 | 3,227,223 | 3,227,625 | 6  | 0  | 5  | no  | TE |
| at_locus.02874 | 2 | 3,252,113 | 3,252,193 | 5  | 9  | 2  | no  |    |
| at_locus.02875 | 2 | 3,308,835 | 3,309,044 | 4  | 0  | 0  | no  | TE |
| at_locus.02876 | 2 | 3,311,537 | 3,311,694 | 0  | 4  | 0  | no  |    |
| at_locus.02877 | 2 | 3,312,900 | 3,313,028 | 2  | 12 | 4  | no  |    |
| at_locus.02878 | 2 | 3,331,584 | 3,332,022 | 9  | 10 | 4  | no  |    |
| at_locus.02879 | 2 | 3,351,084 | 3,351,203 | 1  | 0  | 11 | no  |    |
| at_locus.02880 | 2 | 3,362,106 | 3,362,139 | 0  | 0  | 4  | no  |    |
| at_locus.02881 | 2 | 3,362,268 | 3,362,484 | 0  | 4  | 0  | no  |    |
| at_locus.02882 | 2 | 3,385,615 | 3,385,727 | 14 | 28 | 7  | no  |    |
| at_locus.02883 | 2 | 3,386,619 | 3,386,727 | 0  | 4  | 1  | no  |    |
| at_locus.02884 | 2 | 3,394,510 | 3,394,548 | 4  | 0  | 0  | no  |    |
| at_locus.02885 | 2 | 3,426,130 | 3,426,369 | 0  | 7  | 0  | no  |    |
| at_locus.02886 | 2 | 3,437,571 | 3,437,867 | 12 | 24 | 12 | no  |    |
| at_locus.02887 | 2 | 3,438,532 | 3,438,675 | 4  | 0  | 0  | no  |    |
| at_locus.02888 | 2 | 3,467,118 | 3,467,305 | 34 | 60 | 22 | no  |    |
| at_locus.02889 | 2 | 3,468,211 | 3,468,680 | 5  | 17 | 5  | no  |    |
| at_locus.02891 | 2 | 3,513,473 | 3,513,840 | 0  | 0  | 3  | no  |    |
| at_locus.02892 | 2 | 3,530,709 | 3,530,910 | 0  | 0  | 4  | yes |    |
| at_locus.02893 | 2 | 3,531,136 | 3,531,769 | 10 | 0  | 36 | yes |    |
| at_locus.02894 | 2 | 3,540,097 | 3,540,130 | 4  | 0  | 0  | no  | TE |
| at_locus.02895 | 2 | 3,550,489 | 3,550,853 | 2  | 0  | 5  | no  | TE |
| at_locus.02896 | 2 | 3,551,084 | 3,551,785 | 20 | 0  | 6  | no  | TE |
| at_locus.02897 | 2 | 3,552,032 | 3,552,590 | 2  | 0  | 6  | yes | TE |
| at_locus.02898 | 2 | 3,562,143 | 3,562,188 | 12 | 59 | 53 | no  |    |
| at_locus.02899 | 2 | 3,562,684 | 3,562,746 | 5  | 9  | 24 | no  |    |
| at_locus.02900 | 2 | 3,563,105 | 3,563,126 | 0  | 6  | 10 | no  |    |
| at_locus.02901 | 2 | 3,564,387 | 3,565,286 | 63 | 3  | 1  | no  | TE |
| at_locus.02902 | 2 | 3,573,354 | 3,574,387 | 10 | 0  | 9  | yes | TE |
| at_locus.02903 | 2 | 3,588,547 | 3,588,710 | 1  | 0  | 3  | no  | TE |
| at_locus.02904 | 2 | 3,590,890 | 3,591,114 | 1  | 0  | 4  | no  | TE |

|                |   |           |           |    |    |     |     |    |
|----------------|---|-----------|-----------|----|----|-----|-----|----|
| at_locus.02905 | 2 | 3,597,400 | 3,597,538 | 1  | 0  | 4   | yes | TE |
| at_locus.02906 | 2 | 3,597,639 | 3,598,650 | 21 | 0  | 2   | yes | TE |
| at_locus.02907 | 2 | 3,600,747 | 3,601,872 | 12 | 0  | 19  | no  | TE |
| at_locus.02908 | 2 | 3,603,433 | 3,603,656 | 2  | 1  | 4   | no  | TE |
| at_locus.02909 | 2 | 3,603,931 | 3,604,311 | 1  | 0  | 3   | no  | TE |
| at_locus.02910 | 2 | 3,604,755 | 3,604,992 | 4  | 0  | 6   | no  | TE |
| at_locus.02911 | 2 | 3,605,200 | 3,607,891 | 40 | 4  | 32  | no  | TE |
| at_locus.02912 | 2 | 3,609,002 | 3,609,508 | 6  | 0  | 3   | no  | TE |
| at_locus.02913 | 2 | 3,609,843 | 3,610,479 | 5  | 0  | 3   | no  | TE |
| at_locus.02914 | 2 | 3,610,934 | 3,611,825 | 5  | 0  | 3   | no  | TE |
| at_locus.02915 | 2 | 3,612,420 | 3,618,072 | 62 | 13 | 109 | no  | TE |
| at_locus.02916 | 2 | 3,625,034 | 3,635,537 | 60 | 4  | 134 | no  | TE |
| at_locus.02917 | 2 | 3,636,390 | 3,637,709 | 5  | 0  | 5   | no  | TE |
| at_locus.02918 | 2 | 3,637,981 | 3,640,237 | 6  | 0  | 5   | no  | TE |
| at_locus.02919 | 2 | 3,640,552 | 3,641,242 | 4  | 0  | 3   | no  | TE |
| at_locus.02920 | 2 | 3,641,333 | 3,641,946 | 5  | 0  | 2   | no  | TE |
| at_locus.02921 | 2 | 3,642,032 | 3,644,298 | 28 | 0  | 27  | no  | TE |
| at_locus.02922 | 2 | 3,644,653 | 3,644,802 | 0  | 0  | 4   | no  | TE |
| at_locus.02923 | 2 | 3,644,898 | 3,645,281 | 5  | 0  | 1   | no  | TE |
| at_locus.02924 | 2 | 3,645,498 | 3,645,681 | 7  | 0  | 6   | no  | TE |
| at_locus.02925 | 2 | 3,646,098 | 3,646,367 | 5  | 0  | 11  | no  | TE |
| at_locus.02926 | 2 | 3,646,600 | 3,648,124 | 29 | 0  | 21  | no  | TE |
| at_locus.02927 | 2 | 3,649,982 | 3,650,450 | 6  | 0  | 12  | yes | TE |
| at_locus.02928 | 2 | 3,651,064 | 3,651,199 | 1  | 0  | 4   | no  | TE |
| at_locus.02929 | 2 | 3,652,282 | 3,652,862 | 5  | 0  | 5   | no  | TE |
| at_locus.02930 | 2 | 3,653,906 | 3,654,108 | 3  | 0  | 2   | no  | TE |
| at_locus.02931 | 2 | 3,654,377 | 3,654,592 | 4  | 0  | 2   | no  | TE |
| at_locus.02932 | 2 | 3,654,841 | 3,655,330 | 5  | 0  | 2   | no  | TE |
| at_locus.02933 | 2 | 3,661,065 | 3,661,226 | 4  | 0  | 3   | yes | TE |
| at_locus.02934 | 2 | 3,663,714 | 3,663,806 | 4  | 0  | 0   | no  | TE |
| at_locus.02935 | 2 | 3,667,565 | 3,668,057 | 6  | 1  | 7   | no  | TE |
| at_locus.02936 | 2 | 3,668,393 | 3,668,415 | 3  | 1  | 4   | no  | TE |
| at_locus.02937 | 2 | 3,669,233 | 3,669,561 | 7  | 0  | 10  | no  | TE |
| at_locus.02938 | 2 | 3,670,137 | 3,670,858 | 10 | 2  | 20  | no  | TE |
| at_locus.02939 | 2 | 3,671,122 | 3,672,006 | 15 | 2  | 10  | no  | TE |
| at_locus.02940 | 2 | 3,680,433 | 3,680,612 | 4  | 0  | 0   | yes |    |
| at_locus.02941 | 2 | 3,683,110 | 3,683,351 | 6  | 0  | 2   | yes | TE |

|                |   |           |           |    |   |    |     |    |
|----------------|---|-----------|-----------|----|---|----|-----|----|
| at_locus.02942 | 2 | 3,684,059 | 3,684,472 | 1  | 0 | 5  | yes | TE |
| at_locus.02943 | 2 | 3,688,181 | 3,688,667 | 3  | 0 | 9  | no  | TE |
| at_locus.02944 | 2 | 3,689,548 | 3,690,389 | 16 | 3 | 16 | no  | TE |
| at_locus.02945 | 2 | 3,693,201 | 3,693,731 | 4  | 0 | 2  | no  | TE |
| at_locus.02946 | 2 | 3,702,642 | 3,702,875 | 3  | 0 | 1  | no  | TE |
| at_locus.02947 | 2 | 3,703,900 | 3,704,133 | 3  | 0 | 1  | no  | TE |
| at_locus.02948 | 2 | 3,704,886 | 3,705,018 | 4  | 0 | 1  | no  | TE |
| at_locus.02949 | 2 | 3,705,750 | 3,705,966 | 3  | 0 | 2  | no  | TE |
| at_locus.02950 | 2 | 3,706,915 | 3,707,628 | 5  | 0 | 2  | no  | TE |
| at_locus.02951 | 2 | 3,707,994 | 3,708,484 | 4  | 0 | 3  | no  | TE |
| at_locus.02952 | 2 | 3,719,900 | 3,720,620 | 9  | 1 | 10 | yes | TE |
| at_locus.02953 | 2 | 3,721,180 | 3,721,394 | 7  | 0 | 3  | no  | TE |
| at_locus.02954 | 2 | 3,722,252 | 3,723,688 | 8  | 1 | 9  | no  | TE |
| at_locus.02955 | 2 | 3,724,879 | 3,725,513 | 24 | 4 | 15 | no  | TE |
| at_locus.02956 | 2 | 3,726,572 | 3,726,953 | 4  | 1 | 6  | no  | TE |
| at_locus.02957 | 2 | 3,739,063 | 3,739,111 | 1  | 0 | 7  | no  | TE |
| at_locus.02958 | 2 | 3,739,709 | 3,740,071 | 4  | 0 | 2  | no  | TE |
| at_locus.02959 | 2 | 3,740,399 | 3,740,699 | 4  | 0 | 3  | no  | TE |
| at_locus.02960 | 2 | 3,740,813 | 3,741,108 | 1  | 0 | 6  | no  | TE |
| at_locus.02961 | 2 | 3,745,669 | 3,745,857 | 2  | 0 | 4  | no  | TE |
| at_locus.02962 | 2 | 3,747,040 | 3,747,472 | 3  | 0 | 7  | no  | TE |
| at_locus.02963 | 2 | 3,757,389 | 3,758,328 | 13 | 1 | 24 | no  | TE |
| at_locus.02964 | 2 | 3,758,530 | 3,758,676 | 5  | 0 | 9  | no  | TE |
| at_locus.02965 | 2 | 3,758,960 | 3,759,685 | 9  | 0 | 10 | no  | TE |
| at_locus.02966 | 2 | 3,771,308 | 3,771,704 | 4  | 0 | 13 | no  | TE |
| at_locus.02967 | 2 | 3,771,912 | 3,772,695 | 17 | 0 | 13 | no  | TE |
| at_locus.02968 | 2 | 3,773,250 | 3,773,287 | 2  | 0 | 6  | no  | TE |
| at_locus.02969 | 2 | 3,776,454 | 3,777,081 | 8  | 0 | 5  | no  | TE |
| at_locus.02970 | 2 | 3,777,204 | 3,777,466 | 12 | 0 | 5  | no  | TE |
| at_locus.02971 | 2 | 3,778,165 | 3,778,383 | 4  | 0 | 2  | yes | TE |
| at_locus.02972 | 2 | 3,778,585 | 3,779,651 | 11 | 4 | 33 | no  | TE |
| at_locus.02973 | 2 | 3,779,853 | 3,780,027 | 6  | 0 | 10 | no  | TE |
| at_locus.02974 | 2 | 3,780,282 | 3,780,444 | 2  | 0 | 5  | no  | TE |
| at_locus.02975 | 2 | 3,835,734 | 3,836,058 | 4  | 0 | 2  | no  | TE |
| at_locus.02976 | 2 | 3,838,663 | 3,839,131 | 9  | 0 | 1  | no  | TE |
| at_locus.02977 | 2 | 3,840,719 | 3,840,934 | 6  | 1 | 2  | no  | TE |
| at_locus.02978 | 2 | 3,846,378 | 3,846,887 | 7  | 0 | 2  | no  | TE |

|                |   |           |           |    |   |    |    |    |
|----------------|---|-----------|-----------|----|---|----|----|----|
| at_locus.02979 | 2 | 3,848,893 | 3,848,916 | 5  | 0 | 0  | no | TE |
| at_locus.02980 | 2 | 3,851,699 | 3,851,891 | 9  | 0 | 7  | no | TE |
| at_locus.02981 | 2 | 3,853,916 | 3,854,036 | 4  | 0 | 3  | no | TE |
| at_locus.02982 | 2 | 3,854,429 | 3,854,725 | 0  | 0 | 4  | no | TE |
| at_locus.02983 | 2 | 3,861,966 | 3,862,164 | 12 | 0 | 4  | no | TE |
| at_locus.02984 | 2 | 3,868,292 | 3,868,402 | 0  | 0 | 4  | no | TE |
| at_locus.02985 | 2 | 3,868,657 | 3,869,273 | 18 | 0 | 4  | no | TE |
| at_locus.02986 | 2 | 3,871,772 | 3,871,983 | 4  | 0 | 1  | no | TE |
| at_locus.02987 | 2 | 3,872,385 | 3,872,574 | 0  | 0 | 4  | no | TE |
| at_locus.02988 | 2 | 3,872,805 | 3,874,649 | 24 | 1 | 31 | no | TE |
| at_locus.02989 | 2 | 3,874,903 | 3,875,269 | 19 | 2 | 10 | no | TE |
| at_locus.02990 | 2 | 3,876,891 | 3,877,165 | 4  | 0 | 5  | no | TE |
| at_locus.02991 | 2 | 3,878,658 | 3,879,036 | 4  | 1 | 4  | no | TE |
| at_locus.02992 | 2 | 3,879,877 | 3,880,113 | 9  | 3 | 7  | no | TE |
| at_locus.02993 | 2 | 3,880,300 | 3,880,994 | 4  | 1 | 11 | no | TE |
| at_locus.02994 | 2 | 3,882,419 | 3,882,466 | 1  | 0 | 4  | no | TE |
| at_locus.02995 | 2 | 3,883,318 | 3,883,426 | 1  | 0 | 5  | no | TE |
| at_locus.02996 | 2 | 3,884,101 | 3,884,609 | 5  | 0 | 2  | no | TE |
| at_locus.02997 | 2 | 3,884,749 | 3,885,274 | 10 | 0 | 14 | no | TE |
| at_locus.02998 | 2 | 3,886,840 | 3,887,221 | 4  | 0 | 10 | no | TE |
| at_locus.02999 | 2 | 3,889,483 | 3,890,194 | 21 | 0 | 6  | no | TE |
| at_locus.03000 | 2 | 3,890,985 | 3,891,481 | 6  | 0 | 2  | no | TE |
| at_locus.03001 | 2 | 3,892,742 | 3,893,102 | 9  | 1 | 8  | no | TE |
| at_locus.03002 | 2 | 3,894,258 | 3,894,637 | 2  | 0 | 7  | no | TE |
| at_locus.03003 | 2 | 3,907,752 | 3,907,807 | 0  | 0 | 5  | no | TE |
| at_locus.03004 | 2 | 3,908,647 | 3,908,766 | 5  | 0 | 0  | no | TE |
| at_locus.03005 | 2 | 3,913,947 | 3,914,466 | 11 | 0 | 12 | no | TE |
| at_locus.03006 | 2 | 3,927,280 | 3,927,706 | 15 | 0 | 2  | no | TE |
| at_locus.03007 | 2 | 3,951,797 | 3,952,020 | 4  | 0 | 4  | no | TE |
| at_locus.03008 | 2 | 3,953,324 | 3,954,077 | 12 | 0 | 6  | no | TE |
| at_locus.03009 | 2 | 3,955,380 | 3,955,636 | 4  | 0 | 1  | no | TE |
| at_locus.03010 | 2 | 3,958,978 | 3,959,003 | 0  | 0 | 4  | no | TE |
| at_locus.03011 | 2 | 3,961,733 | 3,961,938 | 0  | 0 | 4  | no | TE |
| at_locus.03012 | 2 | 3,962,298 | 3,962,544 | 1  | 0 | 5  | no | TE |
| at_locus.03013 | 2 | 3,962,791 | 3,963,796 | 26 | 0 | 11 | no | TE |
| at_locus.03014 | 2 | 3,964,325 | 3,965,026 | 9  | 0 | 10 | no | TE |
| at_locus.03015 | 2 | 3,965,297 | 3,965,516 | 3  | 0 | 4  | no | TE |



|                |   |           |           |     |    |     |     |    |
|----------------|---|-----------|-----------|-----|----|-----|-----|----|
| at_locus.03016 | 2 | 3,970,452 | 3,970,562 | 4   | 0  | 2   | no  | TE |
| at_locus.03017 | 2 | 3,971,253 | 3,971,275 | 0   | 0  | 4   | no  | TE |
| at_locus.03018 | 2 | 3,972,116 | 3,972,624 | 31  | 0  | 22  | no  | TE |
| at_locus.03019 | 2 | 3,973,333 | 3,973,974 | 14  | 0  | 12  | no  | TE |
| at_locus.03020 | 2 | 3,974,378 | 3,976,280 | 33  | 2  | 48  | no  | TE |
| at_locus.03021 | 2 | 3,976,484 | 3,976,887 | 11  | 2  | 7   | no  | TE |
| at_locus.03022 | 2 | 3,977,655 | 3,978,220 | 6   | 0  | 9   | yes | TE |
| at_locus.03023 | 2 | 3,978,445 | 3,979,815 | 24  | 4  | 31  | no  | TE |
| at_locus.03024 | 2 | 3,980,057 | 3,980,166 | 4   | 0  | 0   | no  | TE |
| at_locus.03025 | 2 | 3,983,578 | 3,983,960 | 0   | 0  | 5   | no  | TE |
| at_locus.03026 | 2 | 4,002,118 | 4,002,152 | 4   | 0  | 0   | no  | TE |
| at_locus.03027 | 2 | 4,025,359 | 4,025,804 | 10  | 0  | 3   | yes | TE |
| at_locus.03028 | 2 | 4,031,284 | 4,032,071 | 46  | 2  | 0   | no  | TE |
| at_locus.03029 | 2 | 4,032,535 | 4,032,584 | 5   | 0  | 0   | no  | TE |
| at_locus.03030 | 2 | 4,038,195 | 4,038,532 | 3   | 0  | 11  | yes | TE |
| at_locus.03031 | 2 | 4,044,222 | 4,045,222 | 11  | 0  | 5   | no  | TE |
| at_locus.03032 | 2 | 4,054,229 | 4,054,566 | 7   | 0  | 4   | no  | TE |
| at_locus.03033 | 2 | 4,063,132 | 4,063,717 | 5   | 0  | 1   | no  | TE |
| at_locus.03034 | 2 | 4,063,755 | 4,064,455 | 7   | 0  | 15  | no  | TE |
| at_locus.03035 | 2 | 4,085,009 | 4,085,046 | 10  | 0  | 0   | yes | TE |
| at_locus.03036 | 2 | 4,085,585 | 4,086,414 | 4   | 2  | 19  | yes | TE |
| at_locus.03037 | 2 | 4,086,531 | 4,086,778 | 5   | 1  | 0   | yes | TE |
| at_locus.03038 | 2 | 4,093,573 | 4,093,651 | 6   | 0  | 1   | no  | TE |
| at_locus.03039 | 2 | 4,093,920 | 4,093,948 | 11  | 0  | 0   | no  | TE |
| at_locus.03040 | 2 | 4,105,322 | 4,106,011 | 7   | 0  | 6   | no  | TE |
| at_locus.03041 | 2 | 4,106,729 | 4,106,780 | 18  | 1  | 2   | yes | TE |
| at_locus.03042 | 2 | 4,112,568 | 4,113,726 | 183 | 3  | 133 | yes |    |
| at_locus.03043 | 2 | 4,113,937 | 4,116,046 | 226 | 4  | 168 | yes |    |
| at_locus.03044 | 2 | 4,128,074 | 4,128,987 | 2   | 0  | 23  | yes | TE |
| at_locus.03045 | 2 | 4,132,252 | 4,132,539 | 1   | 0  | 6   | yes | TE |
| at_locus.03046 | 2 | 4,136,451 | 4,136,486 | 7   | 0  | 0   | no  | TE |
| at_locus.03047 | 2 | 4,137,488 | 4,137,630 | 5   | 2  | 6   | no  | TE |
| at_locus.03048 | 2 | 4,140,242 | 4,140,646 | 2   | 0  | 5   | yes | TE |
| at_locus.03049 | 2 | 4,149,398 | 4,149,545 | 29  | 75 | 33  | yes |    |
| at_locus.03050 | 2 | 4,161,407 | 4,161,694 | 2   | 0  | 6   | no  | TE |
| at_locus.03051 | 2 | 4,168,644 | 4,168,755 | 4   | 0  | 2   | no  | TE |
| at_locus.03052 | 2 | 4,169,136 | 4,169,356 | 0   | 0  | 4   | yes | TE |

|                |   |           |           |    |   |    |     |    |
|----------------|---|-----------|-----------|----|---|----|-----|----|
| at_locus.03053 | 2 | 4,171,138 | 4,171,170 | 4  | 0 | 0  | no  | TE |
| at_locus.03054 | 2 | 4,174,800 | 4,175,011 | 5  | 0 | 2  | no  | TE |
| at_locus.03055 | 2 | 4,176,961 | 4,177,099 | 5  | 0 | 6  | no  | TE |
| at_locus.03056 | 2 | 4,179,131 | 4,179,405 | 2  | 0 | 6  | yes | TE |
| at_locus.03057 | 2 | 4,180,361 | 4,180,472 | 4  | 0 | 2  | no  | TE |
| at_locus.03058 | 2 | 4,181,558 | 4,181,580 | 0  | 0 | 4  | no  | TE |
| at_locus.03059 | 2 | 4,182,163 | 4,182,384 | 3  | 0 | 5  | no  | TE |
| at_locus.03060 | 2 | 4,182,820 | 4,183,883 | 16 | 1 | 5  | yes | TE |
| at_locus.03061 | 2 | 4,184,107 | 4,184,402 | 6  | 0 | 1  | yes | TE |
| at_locus.03062 | 2 | 4,184,639 | 4,184,749 | 5  | 0 | 1  | no  | TE |
| at_locus.03063 | 2 | 4,185,805 | 4,186,034 | 1  | 0 | 4  | yes | TE |
| at_locus.03064 | 2 | 4,186,968 | 4,187,263 | 6  | 0 | 11 | yes | TE |
| at_locus.03065 | 2 | 4,188,610 | 4,188,847 | 8  | 0 | 7  | yes | TE |
| at_locus.03066 | 2 | 4,191,341 | 4,191,703 | 14 | 1 | 4  | no  | TE |
| at_locus.03067 | 2 | 4,193,203 | 4,193,742 | 21 | 0 | 6  | no  | TE |
| at_locus.03068 | 2 | 4,195,230 | 4,195,650 | 0  | 0 | 5  | no  | TE |
| at_locus.03069 | 2 | 4,199,613 | 4,200,794 | 21 | 0 | 12 | no  | TE |
| at_locus.03070 | 2 | 4,204,553 | 4,205,913 | 13 | 0 | 23 | no  | TE |
| at_locus.03071 | 2 | 4,210,199 | 4,211,953 | 29 | 0 | 20 | yes | TE |
| at_locus.03072 | 2 | 4,216,162 | 4,216,634 | 3  | 0 | 5  | no  | TE |
| at_locus.03073 | 2 | 4,216,949 | 4,218,201 | 12 | 0 | 21 | no  | TE |
| at_locus.03074 | 2 | 4,220,441 | 4,220,644 | 4  | 0 | 0  | no  | TE |
| at_locus.03075 | 2 | 4,220,964 | 4,221,252 | 3  | 0 | 2  | no  | TE |
| at_locus.03076 | 2 | 4,221,520 | 4,221,590 | 4  | 0 | 1  | no  |    |
| at_locus.03077 | 2 | 4,223,666 | 4,225,917 | 26 | 4 | 24 | no  | TE |
| at_locus.03078 | 2 | 4,226,316 | 4,226,609 | 5  | 0 | 2  | yes | TE |
| at_locus.03079 | 2 | 4,226,918 | 4,227,185 | 9  | 0 | 2  | yes | TE |
| at_locus.03080 | 2 | 4,227,602 | 4,227,682 | 4  | 0 | 1  | no  | TE |
| at_locus.03081 | 2 | 4,228,777 | 4,228,988 | 15 | 0 | 4  | no  | TE |
| at_locus.03082 | 2 | 4,229,233 | 4,229,379 | 1  | 3 | 5  | no  |    |
| at_locus.03083 | 2 | 4,234,220 | 4,234,431 | 15 | 0 | 4  | no  | TE |
| at_locus.03084 | 2 | 4,243,929 | 4,244,792 | 20 | 2 | 14 | yes | TE |
| at_locus.03085 | 2 | 4,248,874 | 4,249,052 | 4  | 1 | 2  | no  | TE |
| at_locus.03086 | 2 | 4,249,475 | 4,249,877 | 6  | 0 | 5  | no  | TE |
| at_locus.03087 | 2 | 4,250,463 | 4,251,184 | 23 | 2 | 17 | no  | TE |
| at_locus.03088 | 2 | 4,263,778 | 4,265,376 | 26 | 4 | 32 | no  | TE |
| at_locus.03089 | 2 | 4,277,646 | 4,278,151 | 1  | 0 | 5  | no  | TE |

|                |   |           |           |    |   |    |     |    |
|----------------|---|-----------|-----------|----|---|----|-----|----|
| at_locus.03090 | 2 | 4,288,297 | 4,288,441 | 4  | 0 | 0  | yes | TE |
| at_locus.03091 | 2 | 4,291,053 | 4,291,223 | 10 | 3 | 4  | no  | TE |
| at_locus.03092 | 2 | 4,291,381 | 4,291,562 | 1  | 0 | 4  | yes | TE |
| at_locus.03093 | 2 | 4,292,234 | 4,292,271 | 1  | 0 | 5  | no  | TE |
| at_locus.03094 | 2 | 4,294,333 | 4,294,554 | 0  | 0 | 5  | no  | TE |
| at_locus.03095 | 2 | 4,296,085 | 4,296,264 | 5  | 0 | 0  | no  | TE |
| at_locus.03096 | 2 | 4,296,511 | 4,296,868 | 4  | 0 | 8  | no  | TE |
| at_locus.03097 | 2 | 4,297,173 | 4,297,307 | 1  | 0 | 4  | no  | TE |
| at_locus.03098 | 2 | 4,298,004 | 4,298,499 | 5  | 0 | 4  | no  | TE |
| at_locus.03099 | 2 | 4,306,951 | 4,307,182 | 4  | 0 | 0  | no  | TE |
| at_locus.03100 | 2 | 4,308,695 | 4,308,768 | 4  | 0 | 0  | no  | TE |
| at_locus.03101 | 2 | 4,309,580 | 4,310,172 | 20 | 0 | 4  | yes | TE |
| at_locus.03102 | 2 | 4,313,237 | 4,313,274 | 6  | 0 | 0  | no  | TE |
| at_locus.03103 | 2 | 4,314,502 | 4,314,682 | 4  | 0 | 3  | no  |    |
| at_locus.03104 | 2 | 4,315,974 | 4,316,485 | 0  | 0 | 2  | yes |    |
| at_locus.03105 | 2 | 4,330,734 | 4,330,854 | 0  | 0 | 4  | yes |    |
| at_locus.03106 | 2 | 4,332,114 | 4,332,214 | 0  | 0 | 4  | yes |    |
| at_locus.03107 | 2 | 4,332,860 | 4,333,087 | 0  | 0 | 4  | yes |    |
| at_locus.03108 | 2 | 4,333,341 | 4,333,635 | 6  | 0 | 1  | yes |    |
| at_locus.03109 | 2 | 4,337,365 | 4,337,682 | 0  | 0 | 4  | yes | TE |
| at_locus.03110 | 2 | 4,343,458 | 4,343,604 | 0  | 0 | 5  | yes | TE |
| at_locus.03111 | 2 | 4,344,406 | 4,344,697 | 2  | 0 | 6  | yes | TE |
| at_locus.03112 | 2 | 4,344,960 | 4,345,444 | 6  | 0 | 6  | yes | TE |
| at_locus.03113 | 2 | 4,355,376 | 4,355,578 | 5  | 0 | 0  | no  |    |
| at_locus.03114 | 2 | 4,360,595 | 4,361,747 | 20 | 1 | 12 | no  | TE |
| at_locus.03115 | 2 | 4,362,849 | 4,363,319 | 6  | 0 | 8  | no  | TE |
| at_locus.03116 | 2 | 4,366,285 | 4,366,528 | 5  | 0 | 1  | no  | TE |
| at_locus.03117 | 2 | 4,377,495 | 4,377,916 | 9  | 0 | 3  | no  | TE |
| at_locus.03118 | 2 | 4,378,277 | 4,378,451 | 4  | 0 | 5  | no  | TE |
| at_locus.03119 | 2 | 4,378,928 | 4,379,043 | 1  | 0 | 4  | yes | TE |
| at_locus.03120 | 2 | 4,380,212 | 4,380,508 | 4  | 0 | 0  | yes | TE |
| at_locus.03121 | 2 | 4,390,640 | 4,391,356 | 8  | 0 | 11 | yes | TE |
| at_locus.03122 | 2 | 4,400,006 | 4,400,033 | 1  | 0 | 4  | no  | TE |
| at_locus.03123 | 2 | 4,401,885 | 4,402,231 | 1  | 0 | 4  | yes | TE |
| at_locus.03124 | 2 | 4,402,811 | 4,403,133 | 4  | 0 | 7  | no  | TE |
| at_locus.03125 | 2 | 4,403,430 | 4,403,661 | 4  | 0 | 2  | no  | TE |
| at_locus.03126 | 2 | 4,405,506 | 4,405,982 | 10 | 0 | 13 | no  | TE |

|                |   |           |           |    |   |    |     |    |
|----------------|---|-----------|-----------|----|---|----|-----|----|
| at_locus.03127 | 2 | 4,408,612 | 4,408,847 | 1  | 0 | 4  | yes | TE |
| at_locus.03128 | 2 | 4,409,718 | 4,410,069 | 6  | 0 | 10 | no  | TE |
| at_locus.03129 | 2 | 4,410,802 | 4,410,975 | 5  | 0 | 3  | no  | TE |
| at_locus.03130 | 2 | 4,414,803 | 4,415,056 | 4  | 0 | 2  | no  | TE |
| at_locus.03131 | 2 | 4,452,549 | 4,452,848 | 4  | 0 | 1  | yes | TE |
| at_locus.03132 | 2 | 4,457,902 | 4,457,949 | 6  | 0 | 0  | yes | TE |
| at_locus.03133 | 2 | 4,468,960 | 4,469,012 | 4  | 1 | 0  | no  | TE |
| at_locus.03134 | 2 | 4,469,450 | 4,469,622 | 5  | 0 | 2  | no  | TE |
| at_locus.03135 | 2 | 4,475,009 | 4,475,296 | 5  | 0 | 2  | no  | TE |
| at_locus.03136 | 2 | 4,478,958 | 4,479,298 | 19 | 0 | 1  | no  | TE |
| at_locus.03137 | 2 | 4,480,786 | 4,481,008 | 4  | 0 | 1  | yes |    |
| at_locus.03138 | 2 | 4,482,459 | 4,482,671 | 0  | 0 | 4  | no  | TE |
| at_locus.03139 | 2 | 4,483,486 | 4,483,808 | 6  | 0 | 1  | yes | TE |
| at_locus.03140 | 2 | 4,504,182 | 4,504,716 | 2  | 0 | 4  | no  | TE |
| at_locus.03141 | 2 | 4,512,554 | 4,512,704 | 1  | 0 | 7  | no  |    |
| at_locus.03142 | 2 | 4,518,587 | 4,518,890 | 2  | 0 | 4  | no  | TE |
| at_locus.03143 | 2 | 4,520,881 | 4,521,342 | 9  | 1 | 14 | no  | TE |
| at_locus.03144 | 2 | 4,521,576 | 4,522,177 | 10 | 0 | 12 | no  | TE |
| at_locus.03145 | 2 | 4,522,478 | 4,523,010 | 8  | 1 | 8  | no  | TE |
| at_locus.03146 | 2 | 4,523,199 | 4,524,556 | 19 | 0 | 19 | no  | TE |
| at_locus.03147 | 2 | 4,526,381 | 4,526,751 | 0  | 0 | 7  | no  | TE |
| at_locus.03148 | 2 | 4,526,925 | 4,527,191 | 6  | 0 | 7  | no  | TE |
| at_locus.03149 | 2 | 4,527,437 | 4,527,584 | 2  | 0 | 4  | no  | TE |
| at_locus.03150 | 2 | 4,527,863 | 4,528,399 | 11 | 0 | 16 | no  | TE |
| at_locus.03151 | 2 | 4,528,669 | 4,529,597 | 10 | 0 | 11 | no  | TE |
| at_locus.03152 | 2 | 4,533,190 | 4,533,260 | 5  | 0 | 1  | no  | TE |
| at_locus.03153 | 2 | 4,533,707 | 4,533,908 | 5  | 0 | 0  | no  | TE |
| at_locus.03154 | 2 | 4,565,635 | 4,566,589 | 15 | 1 | 8  | no  | TE |
| at_locus.03155 | 2 | 4,566,810 | 4,568,488 | 28 | 0 | 52 | no  | TE |
| at_locus.03156 | 2 | 4,568,772 | 4,569,508 | 10 | 0 | 25 | no  | TE |
| at_locus.03157 | 2 | 4,569,747 | 4,571,558 | 38 | 1 | 76 | yes | TE |
| at_locus.03158 | 2 | 4,571,593 | 4,572,969 | 70 | 3 | 22 | no  | TE |
| at_locus.03159 | 2 | 4,577,988 | 4,578,900 | 14 | 0 | 18 | no  | TE |
| at_locus.03160 | 2 | 4,579,219 | 4,579,781 | 2  | 0 | 7  | no  | TE |
| at_locus.03161 | 2 | 4,589,436 | 4,589,772 | 10 | 0 | 11 | no  | TE |
| at_locus.03162 | 2 | 4,597,444 | 4,597,635 | 5  | 0 | 0  | yes | TE |
| at_locus.03163 | 2 | 4,600,873 | 4,601,288 | 14 | 0 | 8  | no  | TE |

|                |   |           |           |    |   |    |     |    |
|----------------|---|-----------|-----------|----|---|----|-----|----|
| at_locus.03164 | 2 | 4,602,824 | 4,602,871 | 6  | 0 | 9  | no  | TE |
| at_locus.03165 | 2 | 4,603,184 | 4,603,209 | 4  | 0 | 0  | no  | TE |
| at_locus.03166 | 2 | 4,603,609 | 4,604,006 | 1  | 0 | 4  | no  | TE |
| at_locus.03167 | 2 | 4,605,656 | 4,605,784 | 2  | 0 | 5  | no  | TE |
| at_locus.03168 | 2 | 4,613,437 | 4,614,428 | 9  | 0 | 6  | no  | TE |
| at_locus.03169 | 2 | 4,622,889 | 4,624,470 | 20 | 0 | 17 | no  | TE |
| at_locus.03170 | 2 | 4,656,956 | 4,657,123 | 3  | 0 | 4  | yes | TE |
| at_locus.03171 | 2 | 4,681,958 | 4,682,069 | 4  | 0 | 3  | no  | TE |
| at_locus.03172 | 2 | 4,696,968 | 4,697,296 | 0  | 0 | 5  | yes | TE |
| at_locus.03173 | 2 | 4,697,568 | 4,697,845 | 4  | 0 | 5  | no  | TE |
| at_locus.03174 | 2 | 4,700,979 | 4,701,323 | 1  | 0 | 6  | yes | TE |
| at_locus.03175 | 2 | 4,705,923 | 4,706,647 | 16 | 0 | 7  | no  | TE |
| at_locus.03176 | 2 | 4,716,865 | 4,716,898 | 4  | 0 | 0  | no  | TE |
| at_locus.03177 | 2 | 4,718,788 | 4,719,192 | 5  | 0 | 0  | no  | TE |
| at_locus.03178 | 2 | 4,720,987 | 4,721,423 | 4  | 0 | 3  | no  | TE |
| at_locus.03179 | 2 | 4,722,495 | 4,722,803 | 8  | 0 | 3  | no  | TE |
| at_locus.03180 | 2 | 4,723,444 | 4,723,614 | 0  | 0 | 4  | yes | TE |
| at_locus.03181 | 2 | 4,730,803 | 4,730,824 | 0  | 0 | 5  | no  | TE |
| at_locus.03182 | 2 | 4,730,836 | 4,731,016 | 6  | 0 | 0  | no  | TE |
| at_locus.03183 | 2 | 4,740,575 | 4,740,717 | 3  | 0 | 6  | yes | TE |
| at_locus.03184 | 2 | 4,765,282 | 4,765,742 | 5  | 0 | 1  | no  | TE |
| at_locus.03185 | 2 | 4,766,281 | 4,766,878 | 27 | 0 | 1  | no  | TE |
| at_locus.03186 | 2 | 4,783,301 | 4,783,801 | 0  | 0 | 5  | no  | TE |
| at_locus.03187 | 2 | 4,786,907 | 4,787,194 | 0  | 0 | 4  | no  | TE |
| at_locus.03188 | 2 | 4,787,571 | 4,787,742 | 0  | 0 | 6  | no  | TE |
| at_locus.03189 | 2 | 4,787,959 | 4,788,367 | 6  | 0 | 10 | no  | TE |
| at_locus.03190 | 2 | 4,791,282 | 4,791,614 | 4  | 0 | 0  | no  | TE |
| at_locus.03191 | 2 | 4,803,475 | 4,803,521 | 21 | 0 | 0  | no  | TE |
| at_locus.03192 | 2 | 4,806,192 | 4,806,431 | 0  | 0 | 5  | yes | TE |
| at_locus.03193 | 2 | 4,832,994 | 4,833,245 | 4  | 1 | 7  | no  |    |
| at_locus.03194 | 2 | 4,841,187 | 4,842,109 | 4  | 0 | 14 | yes | TE |
| at_locus.03195 | 2 | 4,853,892 | 4,854,001 | 1  | 0 | 5  | no  | TE |
| at_locus.03196 | 2 | 4,856,759 | 4,856,800 | 3  | 0 | 5  | no  | TE |
| at_locus.03197 | 2 | 4,860,043 | 4,860,487 | 0  | 0 | 4  | no  | TE |
| at_locus.03198 | 2 | 4,869,683 | 4,869,901 | 2  | 0 | 0  | no  | TE |
| at_locus.03199 | 2 | 4,877,438 | 4,877,629 | 0  | 0 | 5  | yes |    |
| at_locus.03200 | 2 | 4,880,257 | 4,880,713 | 5  | 0 | 3  | yes | TE |

|                |   |           |           |    |   |    |     |    |
|----------------|---|-----------|-----------|----|---|----|-----|----|
| at_locus.03201 | 2 | 4,882,365 | 4,882,712 | 2  | 0 | 3  | no  | TE |
| at_locus.03202 | 2 | 4,886,934 | 4,887,456 | 1  | 0 | 3  | no  | TE |
| at_locus.03203 | 2 | 4,890,647 | 4,890,913 | 5  | 0 | 0  | no  | TE |
| at_locus.03204 | 2 | 4,891,528 | 4,891,669 | 1  | 0 | 8  | no  | TE |
| at_locus.03205 | 2 | 4,892,421 | 4,892,471 | 4  | 0 | 0  | no  | TE |
| at_locus.03206 | 2 | 4,893,499 | 4,894,333 | 17 | 0 | 19 | no  | TE |
| at_locus.03207 | 2 | 4,894,593 | 4,894,666 | 5  | 0 | 0  | no  | TE |
| at_locus.03208 | 2 | 4,894,899 | 4,895,127 | 5  | 0 | 0  | no  | TE |
| at_locus.03209 | 2 | 4,909,355 | 4,909,382 | 1  | 0 | 4  | no  | TE |
| at_locus.03210 | 2 | 4,919,005 | 4,919,216 | 5  | 0 | 2  | no  | TE |
| at_locus.03211 | 2 | 4,923,821 | 4,924,812 | 9  | 0 | 5  | no  | TE |
| at_locus.03212 | 2 | 4,926,712 | 4,926,735 | 4  | 0 | 1  | yes | TE |
| at_locus.03213 | 2 | 4,933,889 | 4,934,100 | 5  | 0 | 1  | no  | TE |
| at_locus.03214 | 2 | 4,938,683 | 4,939,674 | 9  | 0 | 6  | no  | TE |
| at_locus.03215 | 2 | 4,941,665 | 4,941,930 | 1  | 0 | 5  | no  | TE |
| at_locus.03216 | 2 | 4,942,122 | 4,944,250 | 30 | 1 | 42 | yes | TE |
| at_locus.03217 | 2 | 4,960,742 | 4,961,204 | 4  | 1 | 5  | yes | TE |
| at_locus.03218 | 2 | 4,964,037 | 4,964,374 | 19 | 0 | 18 | yes | TE |
| at_locus.03219 | 2 | 4,966,474 | 4,967,518 | 18 | 0 | 8  | yes | TE |
| at_locus.03220 | 2 | 4,968,235 | 4,968,939 | 25 | 1 | 14 | yes |    |
| at_locus.03221 | 2 | 4,969,685 | 4,970,137 | 1  | 0 | 11 | yes |    |
| at_locus.03222 | 2 | 4,970,996 | 4,971,590 | 10 | 0 | 11 | yes | TE |
| at_locus.03223 | 2 | 4,971,730 | 4,972,257 | 24 | 3 | 20 | yes |    |
| at_locus.03224 | 2 | 4,972,742 | 4,973,207 | 45 | 5 | 26 | yes |    |
| at_locus.03225 | 2 | 4,973,612 | 4,974,055 | 20 | 0 | 10 | yes |    |
| at_locus.03226 | 2 | 4,980,120 | 4,980,151 | 7  | 0 | 5  | no  |    |
| at_locus.03227 | 2 | 4,980,495 | 4,980,744 | 6  | 0 | 2  | yes | TE |
| at_locus.03228 | 2 | 4,981,984 | 4,982,084 | 4  | 0 | 3  | yes | TE |
| at_locus.03229 | 2 | 4,985,419 | 4,986,014 | 5  | 2 | 4  | no  | TE |
| at_locus.03230 | 2 | 4,996,472 | 4,997,663 | 13 | 0 | 11 | yes | TE |
| at_locus.03231 | 2 | 4,997,974 | 4,998,091 | 8  | 0 | 9  | no  | TE |
| at_locus.03232 | 2 | 4,998,425 | 4,998,762 | 9  | 0 | 12 | yes | TE |
| at_locus.03233 | 2 | 5,004,068 | 5,004,404 | 0  | 0 | 6  | yes | TE |
| at_locus.03234 | 2 | 5,017,171 | 5,017,383 | 13 | 0 | 0  | no  | TE |
| at_locus.03235 | 2 | 5,029,592 | 5,030,011 | 0  | 0 | 10 | yes | TE |
| at_locus.03236 | 2 | 5,044,833 | 5,045,393 | 43 | 0 | 1  | no  | TE |
| at_locus.03237 | 2 | 5,048,304 | 5,048,595 | 4  | 0 | 4  | yes | TE |

|                |   |           |           |    |   |    |     |    |
|----------------|---|-----------|-----------|----|---|----|-----|----|
| at_locus.03238 | 2 | 5,050,040 | 5,050,242 | 1  | 0 | 6  | yes | TE |
| at_locus.03239 | 2 | 5,055,168 | 5,055,302 | 4  | 0 | 2  | yes | TE |
| at_locus.03240 | 2 | 5,059,345 | 5,059,559 | 18 | 0 | 0  | yes | TE |
| at_locus.03241 | 2 | 5,060,983 | 5,061,500 | 3  | 0 | 4  | yes |    |
| at_locus.03242 | 2 | 5,065,356 | 5,065,397 | 6  | 0 | 3  | no  | TE |
| at_locus.03243 | 2 | 5,065,987 | 5,066,253 | 6  | 0 | 0  | yes | TE |
| at_locus.03244 | 2 | 5,066,657 | 5,066,811 | 1  | 0 | 7  | yes | TE |
| at_locus.03245 | 2 | 5,067,656 | 5,067,814 | 4  | 0 | 2  | no  | TE |
| at_locus.03246 | 2 | 5,068,168 | 5,068,380 | 5  | 0 | 1  | no  | TE |
| at_locus.03247 | 2 | 5,087,494 | 5,087,971 | 0  | 0 | 5  | yes | TE |
| at_locus.03248 | 2 | 5,088,618 | 5,088,688 | 40 | 0 | 0  | yes | TE |
| at_locus.03249 | 2 | 5,091,843 | 5,093,419 | 16 | 0 | 18 | yes | TE |
| at_locus.03250 | 2 | 5,097,974 | 5,098,561 | 6  | 0 | 1  | yes | TE |
| at_locus.03251 | 2 | 5,098,863 | 5,099,289 | 5  | 0 | 3  | no  | TE |
| at_locus.03252 | 2 | 5,101,318 | 5,102,500 | 14 | 0 | 17 | yes | TE |
| at_locus.03253 | 2 | 5,103,146 | 5,103,374 | 0  | 0 | 5  | no  | TE |
| at_locus.03254 | 2 | 5,104,094 | 5,104,440 | 4  | 0 | 5  | no  | TE |
| at_locus.03255 | 2 | 5,104,683 | 5,104,927 | 4  | 0 | 2  | no  | TE |
| at_locus.03256 | 2 | 5,109,795 | 5,110,171 | 5  | 0 | 1  | yes | TE |
| at_locus.03257 | 2 | 5,113,402 | 5,113,663 | 2  | 0 | 4  | yes | TE |
| at_locus.03258 | 2 | 5,114,152 | 5,114,380 | 0  | 0 | 5  | no  | TE |
| at_locus.03259 | 2 | 5,116,059 | 5,116,577 | 4  | 0 | 6  | no  | TE |
| at_locus.03260 | 2 | 5,117,005 | 5,117,293 | 2  | 0 | 6  | yes | TE |
| at_locus.03261 | 2 | 5,118,924 | 5,119,050 | 6  | 0 | 0  | no  | TE |
| at_locus.03262 | 2 | 5,126,745 | 5,126,786 | 6  | 0 | 1  | no  | TE |
| at_locus.03263 | 2 | 5,127,118 | 5,127,200 | 3  | 0 | 0  | no  | TE |
| at_locus.03264 | 2 | 5,127,546 | 5,127,711 | 4  | 0 | 3  | yes | TE |
| at_locus.03265 | 2 | 5,130,515 | 5,131,317 | 5  | 0 | 13 | no  | TE |
| at_locus.03266 | 2 | 5,131,673 | 5,131,706 | 1  | 0 | 4  | no  | TE |
| at_locus.03267 | 2 | 5,133,931 | 5,134,146 | 1  | 0 | 5  | no  | TE |
| at_locus.03268 | 2 | 5,135,560 | 5,135,724 | 4  | 0 | 0  | no  | TE |
| at_locus.03269 | 2 | 5,138,156 | 5,138,919 | 5  | 0 | 11 | yes | TE |
| at_locus.03270 | 2 | 5,146,253 | 5,146,363 | 4  | 0 | 2  | no  | TE |
| at_locus.03271 | 2 | 5,151,299 | 5,151,390 | 4  | 0 | 0  | no  | TE |
| at_locus.03272 | 2 | 5,154,977 | 5,155,278 | 4  | 0 | 1  | no  | TE |
| at_locus.03273 | 2 | 5,159,588 | 5,159,611 | 1  | 0 | 4  | no  | TE |
| at_locus.03274 | 2 | 5,160,226 | 5,160,248 | 0  | 0 | 4  | no  | TE |

|                |   |           |           |    |   |    |     |    |
|----------------|---|-----------|-----------|----|---|----|-----|----|
| at_locus.03275 | 2 | 5,161,863 | 5,162,129 | 16 | 0 | 11 | yes | TE |
| at_locus.03276 | 2 | 5,205,176 | 5,205,634 | 6  | 0 | 9  | no  | TE |
| at_locus.03277 | 2 | 5,205,880 | 5,206,381 | 8  | 0 | 10 | no  | TE |
| at_locus.03278 | 2 | 5,206,627 | 5,207,128 | 9  | 0 | 10 | no  | TE |
| at_locus.03279 | 2 | 5,207,391 | 5,207,874 | 7  | 0 | 8  | no  | TE |
| at_locus.03280 | 2 | 5,208,119 | 5,208,619 | 8  | 0 | 10 | no  | TE |
| at_locus.03281 | 2 | 5,208,865 | 5,209,169 | 7  | 0 | 4  | no  | TE |
| at_locus.03282 | 2 | 5,209,468 | 5,209,905 | 8  | 0 | 9  | no  | TE |
| at_locus.03283 | 2 | 5,210,214 | 5,210,650 | 9  | 0 | 9  | no  | TE |
| at_locus.03284 | 2 | 5,210,960 | 5,211,460 | 8  | 0 | 7  | no  | TE |
| at_locus.03285 | 2 | 5,211,705 | 5,212,206 | 7  | 0 | 6  | no  | TE |
| at_locus.03286 | 2 | 5,212,596 | 5,212,895 | 8  | 0 | 8  | no  | TE |
| at_locus.03287 | 2 | 5,220,121 | 5,220,954 | 13 | 0 | 11 | yes | TE |
| at_locus.03288 | 2 | 5,228,082 | 5,228,218 | 39 | 2 | 6  | no  | TE |
| at_locus.03289 | 2 | 5,228,784 | 5,228,850 | 4  | 0 | 0  | no  | TE |
| at_locus.03290 | 2 | 5,229,128 | 5,229,329 | 5  | 0 | 3  | no  | TE |
| at_locus.03291 | 2 | 5,229,762 | 5,230,891 | 9  | 0 | 24 | no  | TE |
| at_locus.03292 | 2 | 5,231,067 | 5,232,658 | 27 | 1 | 51 | no  | TE |
| at_locus.03293 | 2 | 5,233,188 | 5,233,705 | 35 | 1 | 5  | no  | TE |
| at_locus.03294 | 2 | 5,233,991 | 5,234,065 | 4  | 0 | 0  | no  | TE |
| at_locus.03295 | 2 | 5,234,724 | 5,236,115 | 9  | 0 | 25 | no  | TE |
| at_locus.03296 | 2 | 5,236,297 | 5,237,888 | 27 | 1 | 53 | no  | TE |
| at_locus.03297 | 2 | 5,238,547 | 5,238,923 | 35 | 1 | 4  | no  | TE |
| at_locus.03298 | 2 | 5,239,209 | 5,239,283 | 4  | 0 | 0  | no  | TE |
| at_locus.03299 | 2 | 5,240,425 | 5,241,293 | 23 | 0 | 23 | yes | TE |
| at_locus.03300 | 2 | 5,241,567 | 5,241,859 | 1  | 0 | 4  | no  | TE |
| at_locus.03301 | 2 | 5,242,144 | 5,244,694 | 27 | 1 | 69 | no  | TE |
| at_locus.03302 | 2 | 5,244,908 | 5,245,243 | 7  | 0 | 1  | yes | TE |
| at_locus.03303 | 2 | 5,256,847 | 5,258,543 | 12 | 1 | 24 | no  | TE |
| at_locus.03304 | 2 | 5,258,743 | 5,258,937 | 10 | 3 | 5  | no  | TE |
| at_locus.03305 | 2 | 5,260,694 | 5,260,796 | 4  | 0 | 0  | no  | TE |
| at_locus.03306 | 2 | 5,261,048 | 5,261,260 | 6  | 0 | 1  | yes | TE |
| at_locus.03307 | 2 | 5,261,648 | 5,262,057 | 1  | 0 | 4  | no  | TE |
| at_locus.03308 | 2 | 5,264,089 | 5,264,246 | 1  | 0 | 4  | no  | TE |
| at_locus.03309 | 2 | 5,265,631 | 5,265,868 | 2  | 0 | 7  | no  | TE |
| at_locus.03310 | 2 | 5,266,201 | 5,267,464 | 7  | 0 | 14 | no  | TE |
| at_locus.03311 | 2 | 5,267,747 | 5,268,293 | 6  | 0 | 8  | no  | TE |



|                |   |           |           |    |   |    |     |    |
|----------------|---|-----------|-----------|----|---|----|-----|----|
| at_locus.03312 | 2 | 5,268,653 | 5,269,489 | 17 | 1 | 15 | no  | TE |
| at_locus.03313 | 2 | 5,271,292 | 5,271,718 | 3  | 0 | 4  | no  | TE |
| at_locus.03314 | 2 | 5,272,399 | 5,272,636 | 2  | 0 | 7  | no  | TE |
| at_locus.03315 | 2 | 5,272,969 | 5,274,232 | 7  | 0 | 15 | no  | TE |
| at_locus.03316 | 2 | 5,274,515 | 5,275,056 | 5  | 0 | 8  | no  | TE |
| at_locus.03317 | 2 | 5,275,247 | 5,276,255 | 19 | 1 | 20 | no  | TE |
| at_locus.03318 | 2 | 5,278,017 | 5,278,504 | 3  | 0 | 5  | no  | TE |
| at_locus.03319 | 2 | 5,279,124 | 5,279,361 | 2  | 0 | 7  | no  | TE |
| at_locus.03320 | 2 | 5,279,692 | 5,279,859 | 1  | 0 | 4  | no  | TE |
| at_locus.03321 | 2 | 5,280,115 | 5,280,955 | 5  | 0 | 10 | no  | TE |
| at_locus.03322 | 2 | 5,281,238 | 5,281,779 | 5  | 0 | 8  | no  | TE |
| at_locus.03323 | 2 | 5,281,970 | 5,282,978 | 18 | 1 | 20 | no  | TE |
| at_locus.03324 | 2 | 5,284,987 | 5,285,175 | 7  | 0 | 2  | no  | TE |
| at_locus.03325 | 2 | 5,286,705 | 5,286,939 | 4  | 0 | 0  | yes | TE |
| at_locus.03326 | 2 | 5,290,267 | 5,290,463 | 1  | 0 | 5  | no  | TE |
| at_locus.03327 | 2 | 5,314,317 | 5,314,594 | 0  | 1 | 4  | no  | TE |
| at_locus.03328 | 2 | 5,319,392 | 5,319,557 | 5  | 0 | 1  | no  | TE |
| at_locus.03329 | 2 | 5,338,768 | 5,338,830 | 36 | 2 | 5  | no  | TE |
| at_locus.03330 | 2 | 5,339,212 | 5,339,409 | 1  | 0 | 5  | no  | TE |
| at_locus.03331 | 2 | 5,339,884 | 5,340,146 | 6  | 0 | 8  | no  | TE |
| at_locus.03332 | 2 | 5,340,322 | 5,340,682 | 2  | 0 | 13 | no  | TE |
| at_locus.03333 | 2 | 5,342,058 | 5,342,290 | 0  | 0 | 4  | no  | TE |
| at_locus.03334 | 2 | 5,342,557 | 5,343,018 | 2  | 0 | 12 | no  | TE |
| at_locus.03335 | 2 | 5,344,654 | 5,344,696 | 29 | 1 | 3  | no  | TE |
| at_locus.03336 | 2 | 5,352,537 | 5,352,779 | 4  | 0 | 3  | no  | TE |
| at_locus.03337 | 2 | 5,353,960 | 5,354,140 | 6  | 0 | 4  | no  | TE |
| at_locus.03338 | 2 | 5,356,877 | 5,357,179 | 2  | 0 | 5  | no  | TE |
| at_locus.03339 | 2 | 5,361,210 | 5,361,421 | 4  | 0 | 1  | no  | TE |
| at_locus.03340 | 2 | 5,370,995 | 5,371,520 | 10 | 0 | 12 | no  | TE |
| at_locus.03341 | 2 | 5,375,122 | 5,375,517 | 4  | 0 | 0  | no  | TE |
| at_locus.03342 | 2 | 5,382,059 | 5,382,180 | 4  | 0 | 0  | yes | TE |
| at_locus.03343 | 2 | 5,384,344 | 5,384,608 | 4  | 0 | 2  | yes | TE |
| at_locus.03344 | 2 | 5,401,813 | 5,402,068 | 10 | 0 | 0  | no  | TE |
| at_locus.03345 | 2 | 5,403,912 | 5,404,178 | 2  | 0 | 6  | no  | TE |
| at_locus.03346 | 2 | 5,405,264 | 5,405,553 | 1  | 0 | 4  | no  | TE |
| at_locus.03347 | 2 | 5,406,430 | 5,406,850 | 33 | 0 | 1  | yes | TE |
| at_locus.03348 | 2 | 5,430,820 | 5,430,863 | 2  | 0 | 4  | yes | TE |

|                |   |           |           |    |   |     |     |    |
|----------------|---|-----------|-----------|----|---|-----|-----|----|
| at_locus.03349 | 2 | 5,431,472 | 5,431,936 | 1  | 0 | 5   | yes | TE |
| at_locus.03350 | 2 | 5,434,172 | 5,434,571 | 23 | 0 | 15  | yes | TE |
| at_locus.03351 | 2 | 5,435,756 | 5,436,055 | 1  | 1 | 14  | yes |    |
| at_locus.03352 | 2 | 5,439,487 | 5,439,737 | 5  | 0 | 4   | no  | TE |
| at_locus.03353 | 2 | 5,442,257 | 5,442,579 | 5  | 0 | 4   | yes |    |
| at_locus.03354 | 2 | 5,449,109 | 5,449,636 | 4  | 0 | 0   | no  | TE |
| at_locus.03355 | 2 | 5,449,930 | 5,450,199 | 2  | 0 | 4   | no  | TE |
| at_locus.03356 | 2 | 5,450,715 | 5,450,821 | 0  | 0 | 4   | no  | TE |
| at_locus.03357 | 2 | 5,451,360 | 5,451,660 | 4  | 0 | 4   | no  | TE |
| at_locus.03358 | 2 | 5,473,102 | 5,473,394 | 5  | 2 | 1   | no  | TE |
| at_locus.03359 | 2 | 5,474,001 | 5,474,088 | 11 | 0 | 0   | no  | TE |
| at_locus.03360 | 2 | 5,475,776 | 5,476,045 | 5  | 0 | 0   | yes | TE |
| at_locus.03361 | 2 | 5,498,883 | 5,499,213 | 6  | 0 | 0   | no  | TE |
| at_locus.03362 | 2 | 5,501,481 | 5,501,834 | 7  | 0 | 6   | no  | TE |
| at_locus.03363 | 2 | 5,502,539 | 5,502,869 | 5  | 0 | 1   | no  | TE |
| at_locus.03364 | 2 | 5,507,368 | 5,507,549 | 5  | 0 | 1   | no  | TE |
| at_locus.03365 | 2 | 5,514,019 | 5,514,050 | 8  | 0 | 3   | no  |    |
| at_locus.03366 | 2 | 5,517,362 | 5,517,384 | 4  | 0 | 0   | no  | TE |
| at_locus.03367 | 2 | 5,522,999 | 5,523,487 | 0  | 0 | 3   | yes |    |
| at_locus.03368 | 2 | 5,546,863 | 5,547,103 | 0  | 5 | 0   | yes |    |
| at_locus.03369 | 2 | 5,549,379 | 5,549,563 | 6  | 0 | 0   | yes |    |
| at_locus.03370 | 2 | 5,564,460 | 5,565,260 | 20 | 0 | 2   | no  | TE |
| at_locus.03371 | 2 | 5,572,197 | 5,572,399 | 2  | 0 | 6   | no  | TE |
| at_locus.03372 | 2 | 5,572,628 | 5,576,830 | 72 | 3 | 79  | yes | TE |
| at_locus.03373 | 2 | 5,578,258 | 5,578,510 | 7  | 0 | 2   | no  | TE |
| at_locus.03374 | 2 | 5,578,776 | 5,579,210 | 6  | 0 | 8   | no  | TE |
| at_locus.03375 | 2 | 5,579,583 | 5,579,960 | 5  | 0 | 6   | no  | TE |
| at_locus.03376 | 2 | 5,580,733 | 5,581,281 | 8  | 0 | 6   | no  | TE |
| at_locus.03377 | 2 | 5,581,491 | 5,586,094 | 90 | 4 | 107 | yes | TE |
| at_locus.03378 | 2 | 5,589,191 | 5,589,433 | 1  | 0 | 4   | yes |    |
| at_locus.03379 | 2 | 5,595,770 | 5,596,553 | 26 | 1 | 0   | yes |    |
| at_locus.03380 | 2 | 5,598,357 | 5,598,446 | 5  | 0 | 0   | yes |    |
| at_locus.03381 | 2 | 5,605,751 | 5,606,055 | 12 | 0 | 1   | yes |    |
| at_locus.03382 | 2 | 5,606,985 | 5,607,539 | 1  | 0 | 6   | yes |    |
| at_locus.03383 | 2 | 5,609,986 | 5,610,233 | 0  | 0 | 4   | yes | TE |
| at_locus.03384 | 2 | 5,613,426 | 5,613,464 | 4  | 0 | 0   | yes |    |
| at_locus.03385 | 2 | 5,614,536 | 5,614,594 | 8  | 1 | 0   | no  | TE |

|                |   |           |           |     |    |     |     |    |
|----------------|---|-----------|-----------|-----|----|-----|-----|----|
| at_locus.03386 | 2 | 5,618,056 | 5,618,768 | 9   | 0  | 3   | yes | TE |
| at_locus.03387 | 2 | 5,618,998 | 5,619,187 | 1   | 0  | 6   | yes | TE |
| at_locus.03388 | 2 | 5,643,019 | 5,643,211 | 0   | 0  | 4   | yes | TE |
| at_locus.03389 | 2 | 5,643,947 | 5,643,997 | 5   | 0  | 0   | yes |    |
| at_locus.03390 | 2 | 5,655,202 | 5,655,410 | 4   | 0  | 1   | yes | TE |
| at_locus.03391 | 2 | 5,665,575 | 5,665,961 | 1   | 0  | 5   | no  | TE |
| at_locus.03392 | 2 | 5,666,791 | 5,667,155 | 13  | 0  | 5   | no  | TE |
| at_locus.03393 | 2 | 5,667,876 | 5,667,912 | 0   | 0  | 5   | no  |    |
| at_locus.03394 | 2 | 5,668,149 | 5,669,957 | 615 | 13 | 435 | yes |    |
| at_locus.03395 | 2 | 5,716,921 | 5,717,143 | 0   | 0  | 4   | yes | TE |
| at_locus.03396 | 2 | 5,722,282 | 5,722,573 | 1   | 0  | 6   | yes |    |
| at_locus.03397 | 2 | 5,724,415 | 5,724,708 | 10  | 0  | 4   | yes |    |
| at_locus.03398 | 2 | 5,725,464 | 5,726,070 | 6   | 0  | 11  | yes |    |
| at_locus.03399 | 2 | 5,729,183 | 5,729,427 | 4   | 0  | 5   | yes |    |
| at_locus.03400 | 2 | 5,736,061 | 5,736,540 | 4   | 0  | 5   | yes | TE |
| at_locus.03401 | 2 | 5,740,950 | 5,741,067 | 7   | 0  | 0   | yes | TE |
| at_locus.03402 | 2 | 5,742,138 | 5,742,304 | 0   | 0  | 6   | yes |    |
| at_locus.03403 | 2 | 5,742,521 | 5,743,221 | 0   | 0  | 8   | yes |    |
| at_locus.03404 | 2 | 5,743,463 | 5,743,953 | 0   | 0  | 9   | yes | TE |
| at_locus.03405 | 2 | 5,746,797 | 5,747,157 | 5   | 0  | 4   | yes | TE |
| at_locus.03406 | 2 | 5,747,388 | 5,747,997 | 11  | 0  | 2   | yes | TE |
| at_locus.03407 | 2 | 5,748,306 | 5,748,450 | 3   | 1  | 4   | no  | TE |
| at_locus.03408 | 2 | 5,755,811 | 5,756,232 | 2   | 0  | 4   | yes | TE |
| at_locus.03409 | 2 | 5,757,350 | 5,757,779 | 18  | 0  | 19  | yes |    |
| at_locus.03410 | 2 | 5,768,123 | 5,768,315 | 1   | 2  | 9   | yes | TE |
| at_locus.03411 | 2 | 5,768,700 | 5,769,059 | 12  | 0  | 3   | yes | TE |
| at_locus.03412 | 2 | 5,769,340 | 5,769,510 | 7   | 0  | 1   | no  | TE |
| at_locus.03413 | 2 | 5,770,506 | 5,770,927 | 5   | 0  | 6   | yes | TE |
| at_locus.03414 | 2 | 5,771,263 | 5,771,524 | 4   | 0  | 4   | yes | TE |
| at_locus.03415 | 2 | 5,772,240 | 5,772,338 | 9   | 0  | 1   | no  |    |
| at_locus.03416 | 2 | 5,781,905 | 5,782,024 | 13  | 0  | 2   | no  | TE |
| at_locus.03417 | 2 | 5,782,323 | 5,782,491 | 19  | 0  | 0   | yes | TE |
| at_locus.03418 | 2 | 5,786,556 | 5,786,929 | 12  | 1  | 4   | yes | TE |
| at_locus.03419 | 2 | 5,787,219 | 5,787,506 | 38  | 2  | 8   | no  | TE |
| at_locus.03420 | 2 | 5,789,067 | 5,789,857 | 5   | 0  | 12  | yes | TE |
| at_locus.03421 | 2 | 5,790,115 | 5,791,520 | 14  | 0  | 18  | yes | TE |
| at_locus.03422 | 2 | 5,792,297 | 5,792,605 | 4   | 0  | 5   | no  | TE |

|                |   |           |           |    |   |    |     |    |
|----------------|---|-----------|-----------|----|---|----|-----|----|
| at_locus.03423 | 2 | 5,792,879 | 5,793,623 | 14 | 1 | 31 | yes | TE |
| at_locus.03424 | 2 | 5,793,858 | 5,794,333 | 41 | 2 | 9  | no  | TE |
| at_locus.03425 | 2 | 5,799,078 | 5,799,251 | 10 | 0 | 0  | yes |    |
| at_locus.03426 | 2 | 5,806,175 | 5,806,700 | 5  | 0 | 15 | yes | TE |
| at_locus.03427 | 2 | 5,813,885 | 5,814,046 | 58 | 1 | 4  | no  | TE |
| at_locus.03428 | 2 | 5,814,883 | 5,816,027 | 63 | 3 | 15 | no  | TE |
| at_locus.03429 | 2 | 5,816,594 | 5,818,797 | 36 | 0 | 57 | no  | TE |
| at_locus.03430 | 2 | 5,819,006 | 5,820,807 | 37 | 1 | 65 | yes | TE |
| at_locus.03431 | 2 | 5,821,010 | 5,822,135 | 48 | 1 | 7  | no  | TE |
| at_locus.03432 | 2 | 5,822,424 | 5,822,449 | 8  | 0 | 0  | no  | TE |
| at_locus.03433 | 2 | 5,823,124 | 5,823,160 | 4  | 0 | 2  | yes |    |
| at_locus.03434 | 2 | 5,827,440 | 5,827,461 | 0  | 0 | 4  | no  | TE |
| at_locus.03435 | 2 | 5,829,422 | 5,830,554 | 31 | 1 | 3  | no  | TE |
| at_locus.03436 | 2 | 5,834,649 | 5,834,711 | 5  | 0 | 0  | no  | TE |
| at_locus.03437 | 2 | 5,835,292 | 5,835,354 | 5  | 0 | 0  | no  | TE |
| at_locus.03438 | 2 | 5,835,373 | 5,835,855 | 1  | 0 | 5  | yes | TE |
| at_locus.03439 | 2 | 5,836,146 | 5,836,208 | 5  | 0 | 0  | no  | TE |
| at_locus.03440 | 2 | 5,842,577 | 5,842,664 | 7  | 0 | 0  | yes |    |
| at_locus.03441 | 2 | 5,849,804 | 5,850,062 | 19 | 0 | 0  | no  | TE |
| at_locus.03442 | 2 | 5,850,827 | 5,851,011 | 8  | 0 | 0  | no  | TE |
| at_locus.03443 | 2 | 5,853,557 | 5,853,918 | 7  | 0 | 2  | no  | TE |
| at_locus.03444 | 2 | 5,858,322 | 5,858,589 | 7  | 0 | 2  | yes | TE |
| at_locus.03445 | 2 | 5,874,178 | 5,874,336 | 7  | 0 | 0  | yes |    |
| at_locus.03446 | 2 | 5,877,479 | 5,877,576 | 9  | 0 | 0  | no  | TE |
| at_locus.03447 | 2 | 5,881,301 | 5,881,462 | 6  | 0 | 1  | yes |    |
| at_locus.03448 | 2 | 5,887,270 | 5,887,368 | 4  | 0 | 0  | yes | TE |
| at_locus.03449 | 2 | 5,892,308 | 5,892,740 | 10 | 6 | 6  | no  |    |
| at_locus.03450 | 2 | 5,896,609 | 5,896,696 | 4  | 0 | 1  | no  | TE |
| at_locus.03451 | 2 | 5,924,931 | 5,925,127 | 5  | 0 | 0  | yes | TE |
| at_locus.03452 | 2 | 5,941,358 | 5,941,599 | 6  | 0 | 0  | yes | TE |
| at_locus.03453 | 2 | 5,943,801 | 5,943,846 | 5  | 0 | 0  | no  | TE |
| at_locus.03454 | 2 | 5,946,393 | 5,947,511 | 16 | 0 | 11 | yes |    |
| at_locus.03455 | 2 | 5,948,246 | 5,948,401 | 10 | 2 | 11 | yes |    |
| at_locus.03456 | 2 | 5,948,604 | 5,948,893 | 6  | 0 | 1  | yes |    |
| at_locus.03457 | 2 | 5,949,290 | 5,949,398 | 5  | 2 | 0  | yes |    |
| at_locus.03458 | 2 | 5,950,592 | 5,950,623 | 5  | 0 | 2  | yes |    |
| at_locus.03459 | 2 | 5,951,047 | 5,952,914 | 42 | 0 | 42 | yes | TE |

|                |   |           |           |    |   |    |     |    |
|----------------|---|-----------|-----------|----|---|----|-----|----|
| at_locus.03460 | 2 | 5,967,401 | 5,968,200 | 19 | 0 | 24 | yes | TE |
| at_locus.03461 | 2 | 5,968,801 | 5,968,892 | 3  | 0 | 4  | no  | TE |
| at_locus.03462 | 2 | 5,971,932 | 5,972,028 | 6  | 0 | 3  | no  | TE |
| at_locus.03463 | 2 | 5,973,011 | 5,973,629 | 8  | 0 | 6  | yes | TE |
| at_locus.03464 | 2 | 5,975,608 | 5,977,062 | 8  | 0 | 9  | no  | TE |
| at_locus.03465 | 2 | 5,977,450 | 5,977,837 | 5  | 0 | 4  | no  | TE |
| at_locus.03466 | 2 | 5,978,255 | 5,978,291 | 1  | 0 | 5  | no  | TE |
| at_locus.03467 | 2 | 5,980,260 | 5,980,521 | 4  | 0 | 2  | no  | TE |
| at_locus.03468 | 2 | 5,982,085 | 5,982,386 | 8  | 0 | 4  | no  | TE |
| at_locus.03469 | 2 | 5,982,600 | 5,982,887 | 21 | 0 | 16 | no  | TE |
| at_locus.03470 | 2 | 5,992,068 | 5,992,406 | 4  | 0 | 1  | yes | TE |
| at_locus.03471 | 2 | 5,992,938 | 5,993,927 | 21 | 1 | 9  | yes | TE |
| at_locus.03472 | 2 | 5,994,356 | 5,994,730 | 4  | 0 | 7  | yes | TE |
| at_locus.03473 | 2 | 5,996,561 | 5,997,017 | 3  | 0 | 4  | yes | TE |
| at_locus.03474 | 2 | 5,997,449 | 5,997,972 | 2  | 0 | 5  | yes | TE |
| at_locus.03475 | 2 | 5,998,238 | 5,998,276 | 1  | 0 | 4  | no  | TE |
| at_locus.03476 | 2 | 5,998,567 | 5,998,712 | 0  | 0 | 4  | yes | TE |
| at_locus.03477 | 2 | 5,998,812 | 5,999,153 | 9  | 0 | 5  | no  | TE |
| at_locus.03478 | 2 | 5,999,580 | 5,999,914 | 7  | 0 | 1  | yes | TE |
| at_locus.03479 | 2 | 6,000,126 | 6,000,431 | 2  | 0 | 7  | no  | TE |
| at_locus.03480 | 2 | 6,001,348 | 6,001,536 | 1  | 0 | 6  | yes | TE |
| at_locus.03481 | 2 | 6,001,745 | 6,002,128 | 5  | 0 | 1  | no  | TE |
| at_locus.03482 | 2 | 6,003,039 | 6,003,194 | 6  | 0 | 1  | no  | TE |
| at_locus.03483 | 2 | 6,003,508 | 6,003,561 | 0  | 0 | 4  | no  | TE |
| at_locus.03484 | 2 | 6,004,394 | 6,004,456 | 5  | 0 | 0  | yes | TE |
| at_locus.03485 | 2 | 6,011,916 | 6,012,346 | 1  | 0 | 7  | yes | TE |
| at_locus.03486 | 2 | 6,043,489 | 6,043,738 | 7  | 0 | 0  | yes |    |
| at_locus.03487 | 2 | 6,051,111 | 6,052,030 | 44 | 1 | 14 | yes | TE |
| at_locus.03488 | 2 | 6,052,222 | 6,052,579 | 5  | 0 | 0  | yes | TE |
| at_locus.03489 | 2 | 6,053,103 | 6,053,513 | 5  | 0 | 0  | yes | TE |
| at_locus.03490 | 2 | 6,062,258 | 6,062,773 | 5  | 0 | 4  | yes |    |
| at_locus.03491 | 2 | 6,088,946 | 6,089,201 | 3  | 0 | 9  | yes | TE |
| at_locus.03492 | 2 | 6,091,191 | 6,091,539 | 11 | 0 | 0  | no  | TE |
| at_locus.03493 | 2 | 6,091,840 | 6,092,132 | 4  | 0 | 0  | no  | TE |
| at_locus.03494 | 2 | 6,096,800 | 6,096,844 | 4  | 0 | 0  | yes |    |
| at_locus.03495 | 2 | 6,106,612 | 6,106,840 | 12 | 0 | 0  | no  | TE |
| at_locus.03496 | 2 | 6,107,316 | 6,108,038 | 46 | 3 | 0  | no  | TE |

|                |   |           |           |     |   |     |     |    |
|----------------|---|-----------|-----------|-----|---|-----|-----|----|
| at_locus.03497 | 2 | 6,108,373 | 6,108,936 | 25  | 0 | 2   | yes | TE |
| at_locus.03498 | 2 | 6,137,488 | 6,137,989 | 14  | 0 | 1   | no  | TE |
| at_locus.03499 | 2 | 6,146,738 | 6,147,145 | 2   | 0 | 4   | no  | TE |
| at_locus.03500 | 2 | 6,171,270 | 6,171,330 | 9   | 0 | 1   | no  |    |
| at_locus.03501 | 2 | 6,177,729 | 6,177,755 | 4   | 0 | 0   | yes | TE |
| at_locus.03502 | 2 | 6,184,094 | 6,184,316 | 1   | 0 | 4   | no  | TE |
| at_locus.03503 | 2 | 6,184,615 | 6,184,890 | 7   | 0 | 3   | yes | TE |
| at_locus.03504 | 2 | 6,186,949 | 6,187,053 | 8   | 0 | 0   | yes | TE |
| at_locus.03505 | 2 | 6,200,093 | 6,200,673 | 10  | 1 | 7   | yes | TE |
| at_locus.03506 | 2 | 6,201,179 | 6,201,608 | 3   | 0 | 15  | yes | TE |
| at_locus.03507 | 2 | 6,202,637 | 6,203,383 | 3   | 0 | 7   | yes |    |
| at_locus.03508 | 2 | 6,203,641 | 6,203,919 | 1   | 0 | 5   | yes |    |
| at_locus.03509 | 2 | 6,213,675 | 6,214,231 | 36  | 0 | 1   | no  | TE |
| at_locus.03510 | 2 | 6,214,968 | 6,214,996 | 17  | 1 | 2   | no  | TE |
| at_locus.03511 | 2 | 6,224,287 | 6,224,379 | 12  | 0 | 13  | yes | TE |
| at_locus.03512 | 2 | 6,224,581 | 6,224,637 | 6   | 0 | 1   | yes | TE |
| at_locus.03513 | 2 | 6,226,273 | 6,226,804 | 11  | 0 | 7   | yes |    |
| at_locus.03514 | 2 | 6,254,097 | 6,254,948 | 17  | 0 | 20  | yes |    |
| at_locus.03515 | 2 | 6,255,881 | 6,256,545 | 22  | 1 | 7   | no  | TE |
| at_locus.03516 | 2 | 6,257,632 | 6,257,764 | 14  | 0 | 0   | yes |    |
| at_locus.03517 | 2 | 6,269,466 | 6,272,015 | 68  | 2 | 19  | yes | TE |
| at_locus.03518 | 2 | 6,272,236 | 6,273,397 | 34  | 0 | 43  | no  | TE |
| at_locus.03519 | 2 | 6,273,678 | 6,278,120 | 110 | 4 | 121 | yes | TE |
| at_locus.03520 | 2 | 6,281,690 | 6,282,043 | 13  | 1 | 0   | yes |    |
| at_locus.03521 | 2 | 6,323,402 | 6,323,546 | 7   | 0 | 0   | no  | TE |
| at_locus.03522 | 2 | 6,323,772 | 6,323,865 | 8   | 0 | 2   | no  |    |
| at_locus.03523 | 2 | 6,325,091 | 6,325,255 | 6   | 0 | 0   | yes | TE |
| at_locus.03524 | 2 | 6,332,856 | 6,333,272 | 6   | 0 | 4   | yes |    |
| at_locus.03525 | 2 | 6,336,997 | 6,337,754 | 15  | 0 | 22  | no  | TE |
| at_locus.03526 | 2 | 6,337,813 | 6,338,494 | 10  | 0 | 7   | no  | TE |
| at_locus.03527 | 2 | 6,340,721 | 6,341,184 | 7   | 0 | 7   | no  | TE |
| at_locus.03528 | 2 | 6,341,675 | 6,342,242 | 5   | 0 | 5   | no  | TE |
| at_locus.03529 | 2 | 6,343,261 | 6,343,578 | 3   | 1 | 5   | no  | TE |
| at_locus.03530 | 2 | 6,343,968 | 6,344,928 | 3   | 0 | 15  | yes | TE |
| at_locus.03531 | 2 | 6,346,384 | 6,347,914 | 16  | 0 | 21  | no  | TE |
| at_locus.03532 | 2 | 6,348,232 | 6,348,484 | 4   | 0 | 4   | no  | TE |
| at_locus.03533 | 2 | 6,348,774 | 6,350,115 | 9   | 0 | 23  | no  | TE |

|                |   |           |           |    |   |    |     |    |
|----------------|---|-----------|-----------|----|---|----|-----|----|
| at_locus.03534 | 2 | 6,350,514 | 6,350,846 | 9  | 0 | 9  | no  | TE |
| at_locus.03535 | 2 | 6,351,032 | 6,351,487 | 3  | 0 | 13 | no  | TE |
| at_locus.03536 | 2 | 6,351,632 | 6,352,064 | 11 | 0 | 0  | yes | TE |
| at_locus.03537 | 2 | 6,356,090 | 6,356,677 | 18 | 0 | 11 | yes | TE |
| at_locus.03538 | 2 | 6,357,751 | 6,357,823 | 4  | 0 | 0  | yes |    |
| at_locus.03539 | 2 | 6,358,359 | 6,358,833 | 5  | 3 | 8  | yes | TE |
| at_locus.03540 | 2 | 6,382,900 | 6,383,148 | 5  | 0 | 0  | yes | TE |
| at_locus.03541 | 2 | 6,384,182 | 6,385,023 | 97 | 1 | 64 | yes |    |
| at_locus.03542 | 2 | 6,386,094 | 6,386,803 | 26 | 1 | 13 | yes |    |
| at_locus.03543 | 2 | 6,390,309 | 6,390,600 | 8  | 2 | 1  | no  | TE |
| at_locus.03544 | 2 | 6,390,910 | 6,391,136 | 6  | 0 | 0  | no  | TE |
| at_locus.03545 | 2 | 6,405,277 | 6,405,521 | 38 | 1 | 7  | yes |    |
| at_locus.03546 | 2 | 6,409,755 | 6,409,910 | 4  | 0 | 0  | yes | TE |
| at_locus.03547 | 2 | 6,416,911 | 6,417,018 | 1  | 0 | 4  | no  | TE |
| at_locus.03548 | 2 | 6,418,231 | 6,418,312 | 25 | 0 | 0  | yes | TE |
| at_locus.03549 | 2 | 6,419,888 | 6,420,128 | 20 | 0 | 8  | yes |    |
| at_locus.03550 | 2 | 6,422,337 | 6,422,593 | 12 | 8 | 22 | yes | TE |
| at_locus.03551 | 2 | 6,475,733 | 6,475,951 | 4  | 0 | 0  | yes | TE |
| at_locus.03552 | 2 | 6,476,177 | 6,476,266 | 5  | 0 | 0  | no  | TE |
| at_locus.03553 | 2 | 6,487,735 | 6,487,760 | 6  | 0 | 0  | yes |    |
| at_locus.03554 | 2 | 6,502,796 | 6,504,415 | 27 | 1 | 31 | yes |    |
| at_locus.03555 | 2 | 6,504,704 | 6,505,227 | 12 | 0 | 12 | yes |    |
| at_locus.03556 | 2 | 6,505,964 | 6,506,617 | 17 | 0 | 19 | yes |    |
| at_locus.03557 | 2 | 6,514,961 | 6,515,108 | 0  | 0 | 4  | yes |    |
| at_locus.03558 | 2 | 6,516,111 | 6,517,371 | 11 | 1 | 13 | yes | TE |
| at_locus.03559 | 2 | 6,520,971 | 6,521,135 | 4  | 0 | 0  | yes | TE |
| at_locus.03560 | 2 | 6,522,426 | 6,522,503 | 0  | 0 | 5  | no  | TE |
| at_locus.03561 | 2 | 6,551,497 | 6,551,553 | 11 | 0 | 0  | yes |    |
| at_locus.03562 | 2 | 6,555,515 | 6,555,547 | 7  | 0 | 0  | no  |    |
| at_locus.03563 | 2 | 6,558,011 | 6,558,094 | 0  | 0 | 4  | yes |    |
| at_locus.03564 | 2 | 6,567,401 | 6,567,555 | 9  | 0 | 1  | no  |    |
| at_locus.03565 | 2 | 6,571,509 | 6,571,565 | 4  | 0 | 2  | no  |    |
| at_locus.03566 | 2 | 6,573,250 | 6,574,109 | 50 | 0 | 17 | yes | TE |
| at_locus.03567 | 2 | 6,574,656 | 6,574,784 | 4  | 0 | 4  | no  | TE |
| at_locus.03568 | 2 | 6,576,110 | 6,576,627 | 5  | 0 | 1  | no  | TE |
| at_locus.03569 | 2 | 6,577,506 | 6,577,966 | 9  | 1 | 6  | no  | TE |
| at_locus.03570 | 2 | 6,578,422 | 6,578,445 | 5  | 0 | 1  | no  | TE |

|                |   |           |           |    |   |    |     |    |
|----------------|---|-----------|-----------|----|---|----|-----|----|
| at_locus.03571 | 2 | 6,579,070 | 6,579,378 | 9  | 0 | 1  | no  | TE |
| at_locus.03572 | 2 | 6,580,244 | 6,580,280 | 1  | 0 | 5  | no  | TE |
| at_locus.03573 | 2 | 6,582,248 | 6,582,509 | 4  | 0 | 2  | no  | TE |
| at_locus.03574 | 2 | 6,584,117 | 6,584,666 | 8  | 0 | 4  | no  | TE |
| at_locus.03575 | 2 | 6,584,879 | 6,585,087 | 5  | 0 | 10 | yes | TE |
| at_locus.03576 | 2 | 6,585,709 | 6,586,650 | 11 | 1 | 6  | yes | TE |
| at_locus.03577 | 2 | 6,590,467 | 6,591,383 | 13 | 0 | 7  | no  | TE |
| at_locus.03578 | 2 | 6,599,513 | 6,600,308 | 13 | 0 | 18 | no  | TE |
| at_locus.03579 | 2 | 6,600,853 | 6,601,000 | 2  | 0 | 1  | no  | TE |
| at_locus.03580 | 2 | 6,603,694 | 6,604,152 | 11 | 1 | 6  | no  | TE |
| at_locus.03581 | 2 | 6,604,405 | 6,604,620 | 6  | 0 | 1  | no  | TE |
| at_locus.03582 | 2 | 6,605,268 | 6,605,760 | 8  | 0 | 5  | no  | TE |
| at_locus.03583 | 2 | 6,607,740 | 6,608,590 | 8  | 0 | 9  | no  | TE |
| at_locus.03584 | 2 | 6,608,980 | 6,609,129 | 0  | 0 | 4  | no  | TE |
| at_locus.03585 | 2 | 6,609,212 | 6,609,593 | 5  | 0 | 1  | no  | TE |
| at_locus.03586 | 2 | 6,610,010 | 6,610,046 | 1  | 0 | 5  | no  | TE |
| at_locus.03587 | 2 | 6,613,881 | 6,614,434 | 8  | 0 | 4  | no  | TE |
| at_locus.03588 | 2 | 6,614,647 | 6,614,933 | 24 | 0 | 21 | yes | TE |
| at_locus.03589 | 2 | 6,636,347 | 6,636,391 | 4  | 0 | 0  | yes | TE |
| at_locus.03590 | 2 | 6,636,657 | 6,636,698 | 7  | 0 | 0  | no  | TE |
| at_locus.03591 | 2 | 6,636,916 | 6,636,950 | 8  | 0 | 0  | no  | TE |
| at_locus.03592 | 2 | 6,641,759 | 6,641,918 | 11 | 0 | 4  | yes |    |
| at_locus.03593 | 2 | 6,654,787 | 6,655,167 | 0  | 0 | 4  | yes |    |
| at_locus.03594 | 2 | 6,663,072 | 6,663,327 | 6  | 0 | 11 | yes |    |
| at_locus.03595 | 2 | 6,665,380 | 6,666,003 | 6  | 0 | 0  | yes | TE |
| at_locus.03596 | 2 | 6,666,454 | 6,667,698 | 16 | 1 | 10 | no  | TE |
| at_locus.03597 | 2 | 6,668,670 | 6,668,763 | 5  | 0 | 1  | no  | TE |
| at_locus.03598 | 2 | 6,669,026 | 6,669,611 | 10 | 0 | 4  | no  | TE |
| at_locus.03599 | 2 | 6,669,981 | 6,670,129 | 4  | 1 | 4  | no  | TE |
| at_locus.03600 | 2 | 6,670,388 | 6,670,531 | 11 | 0 | 0  | no  | TE |
| at_locus.03601 | 2 | 6,670,769 | 6,671,201 | 14 | 1 | 0  | no  | TE |
| at_locus.03602 | 2 | 6,675,237 | 6,675,348 | 6  | 0 | 0  | yes | TE |
| at_locus.03603 | 2 | 6,685,536 | 6,686,185 | 15 | 0 | 0  | no  | TE |
| at_locus.03604 | 2 | 6,686,445 | 6,686,484 | 12 | 0 | 0  | no  | TE |
| at_locus.03605 | 2 | 6,686,528 | 6,686,835 | 1  | 0 | 5  | no  | TE |
| at_locus.03606 | 2 | 6,687,742 | 6,687,816 | 16 | 0 | 0  | yes | TE |
| at_locus.03607 | 2 | 6,689,284 | 6,689,421 | 6  | 0 | 0  | no  | TE |



|                |   |           |           |    |    |    |     |    |
|----------------|---|-----------|-----------|----|----|----|-----|----|
| at_locus.03608 | 2 | 6,721,958 | 6,721,986 | 4  | 0  | 0  | no  | TE |
| at_locus.03609 | 2 | 6,723,087 | 6,723,260 | 11 | 2  | 1  | yes | TE |
| at_locus.03610 | 2 | 6,724,180 | 6,724,233 | 0  | 0  | 4  | no  | TE |
| at_locus.03611 | 2 | 6,729,294 | 6,729,620 | 0  | 1  | 4  | yes | TE |
| at_locus.03612 | 2 | 6,735,733 | 6,737,048 | 19 | 0  | 9  | yes | TE |
| at_locus.03613 | 2 | 6,737,854 | 6,737,991 | 7  | 0  | 2  | yes | TE |
| at_locus.03614 | 2 | 6,738,521 | 6,739,312 | 20 | 4  | 13 | yes | TE |
| at_locus.03615 | 2 | 6,739,977 | 6,740,345 | 14 | 0  | 1  | yes | TE |
| at_locus.03616 | 2 | 6,745,046 | 6,745,480 | 7  | 0  | 7  | yes |    |
| at_locus.03617 | 2 | 6,747,215 | 6,747,390 | 16 | 1  | 1  | no  | TE |
| at_locus.03618 | 2 | 6,772,531 | 6,772,639 | 4  | 0  | 0  | yes |    |
| at_locus.03619 | 2 | 6,784,820 | 6,784,845 | 4  | 17 | 2  | yes |    |
| at_locus.03620 | 2 | 6,785,992 | 6,786,399 | 7  | 0  | 1  | yes | TE |
| at_locus.03621 | 2 | 6,793,464 | 6,793,975 | 0  | 0  | 4  | yes |    |
| at_locus.03622 | 2 | 6,810,732 | 6,810,810 | 30 | 2  | 0  | no  | TE |
| at_locus.03623 | 2 | 6,811,043 | 6,811,354 | 24 | 0  | 0  | no  | TE |
| at_locus.03624 | 2 | 6,820,153 | 6,820,218 | 5  | 0  | 0  | yes |    |
| at_locus.03625 | 2 | 6,848,546 | 6,848,597 | 4  | 0  | 0  | yes | TE |
| at_locus.03626 | 2 | 6,850,006 | 6,850,122 | 4  | 0  | 0  | yes | TE |
| at_locus.03627 | 2 | 6,859,968 | 6,860,864 | 24 | 0  | 2  | no  | TE |
| at_locus.03628 | 2 | 6,861,543 | 6,861,587 | 5  | 0  | 1  | no  | TE |
| at_locus.03629 | 2 | 6,861,961 | 6,862,034 | 8  | 0  | 1  | yes | TE |
| at_locus.03630 | 2 | 6,868,144 | 6,868,203 | 4  | 0  | 0  | no  | TE |
| at_locus.03631 | 2 | 6,899,341 | 6,899,889 | 20 | 0  | 19 | yes | TE |
| at_locus.03632 | 2 | 6,900,122 | 6,900,335 | 4  | 0  | 7  | yes | TE |
| at_locus.03633 | 2 | 6,904,166 | 6,904,287 | 4  | 0  | 0  | yes | TE |
| at_locus.03634 | 2 | 6,908,070 | 6,908,302 | 5  | 0  | 0  | yes | TE |
| at_locus.03635 | 2 | 6,908,882 | 6,909,006 | 7  | 0  | 0  | no  | TE |
| at_locus.03636 | 2 | 6,909,288 | 6,909,314 | 4  | 0  | 1  | yes |    |
| at_locus.03637 | 2 | 6,909,659 | 6,910,699 | 54 | 1  | 38 | yes |    |
| at_locus.03638 | 2 | 6,921,156 | 6,921,541 | 0  | 0  | 5  | yes | TE |
| at_locus.03639 | 2 | 6,922,220 | 6,922,441 | 4  | 0  | 2  | yes |    |
| at_locus.03640 | 2 | 6,929,992 | 6,930,160 | 18 | 0  | 0  | no  | TE |
| at_locus.03641 | 2 | 6,930,375 | 6,930,809 | 44 | 3  | 0  | no  | TE |
| at_locus.03642 | 2 | 6,931,048 | 6,931,179 | 13 | 0  | 0  | no  | TE |
| at_locus.03643 | 2 | 6,931,436 | 6,931,748 | 12 | 2  | 0  | no  | TE |
| at_locus.03644 | 2 | 6,932,374 | 6,932,459 | 9  | 0  | 0  | no  | TE |

|                |   |           |           |    |   |     |     |    |
|----------------|---|-----------|-----------|----|---|-----|-----|----|
| at_locus.03645 | 2 | 6,933,576 | 6,933,747 | 8  | 0 | 0   | yes |    |
| at_locus.03646 | 2 | 6,952,091 | 6,952,703 | 6  | 0 | 1   | yes | TE |
| at_locus.03647 | 2 | 6,953,352 | 6,953,623 | 5  | 0 | 1   | yes |    |
| at_locus.03649 | 2 | 6,955,820 | 6,955,893 | 4  | 0 | 0   | yes |    |
| at_locus.03650 | 2 | 6,960,228 | 6,960,380 | 5  | 0 | 0   | yes |    |
| at_locus.03651 | 2 | 6,976,658 | 6,976,731 | 3  | 0 | 4   | yes |    |
| at_locus.03652 | 2 | 6,979,110 | 6,981,112 | 28 | 0 | 51  | yes |    |
| at_locus.03653 | 2 | 6,981,350 | 6,983,904 | 86 | 4 | 112 | yes |    |
| at_locus.03654 | 2 | 6,985,460 | 6,985,590 | 10 | 0 | 0   | yes |    |
| at_locus.03655 | 2 | 6,997,530 | 6,998,115 | 3  | 0 | 4   | yes | TE |
| at_locus.03656 | 2 | 6,999,345 | 6,999,995 | 11 | 0 | 2   | yes | TE |
| at_locus.03657 | 2 | 7,015,939 | 7,017,106 | 25 | 0 | 21  | yes | TE |
| at_locus.03658 | 2 | 7,017,563 | 7,017,907 | 3  | 0 | 5   | no  | TE |
| at_locus.03659 | 2 | 7,018,134 | 7,018,184 | 4  | 0 | 0   | no  | TE |
| at_locus.03660 | 2 | 7,018,936 | 7,019,077 | 0  | 0 | 5   | no  | TE |
| at_locus.03661 | 2 | 7,020,466 | 7,020,914 | 5  | 0 | 5   | yes | TE |
| at_locus.03662 | 2 | 7,040,573 | 7,040,708 | 5  | 0 | 0   | yes |    |
| at_locus.03663 | 2 | 7,073,873 | 7,074,028 | 5  | 0 | 0   | no  | TE |
| at_locus.03664 | 2 | 7,074,563 | 7,075,088 | 17 | 0 | 15  | yes | TE |
| at_locus.03665 | 2 | 7,076,760 | 7,076,876 | 4  | 0 | 0   | no  | TE |
| at_locus.03666 | 2 | 7,077,394 | 7,077,679 | 10 | 0 | 6   | no  | TE |
| at_locus.03667 | 2 | 7,080,283 | 7,080,376 | 1  | 0 | 4   | yes |    |
| at_locus.03668 | 2 | 7,080,586 | 7,080,616 | 8  | 0 | 0   | yes |    |
| at_locus.03669 | 2 | 7,103,228 | 7,103,545 | 5  | 0 | 1   | yes | TE |
| at_locus.03670 | 2 | 7,118,866 | 7,119,341 | 21 | 0 | 0   | no  | TE |
| at_locus.03671 | 2 | 7,119,718 | 7,120,174 | 10 | 0 | 1   | yes | TE |
| at_locus.03672 | 2 | 7,122,350 | 7,122,572 | 6  | 0 | 0   | yes | TE |
| at_locus.03673 | 2 | 7,123,982 | 7,124,269 | 1  | 0 | 5   | yes | TE |
| at_locus.03674 | 2 | 7,125,285 | 7,125,669 | 0  | 0 | 4   | yes | TE |
| at_locus.03675 | 2 | 7,155,192 | 7,155,545 | 10 | 0 | 3   | yes |    |
| at_locus.03676 | 2 | 7,160,706 | 7,161,125 | 11 | 2 | 0   | no  | TE |
| at_locus.03677 | 2 | 7,161,733 | 7,161,810 | 15 | 0 | 0   | no  | TE |
| at_locus.03678 | 2 | 7,162,633 | 7,162,873 | 12 | 0 | 1   | no  | TE |
| at_locus.03679 | 2 | 7,163,166 | 7,163,523 | 7  | 0 | 1   | yes | TE |
| at_locus.03680 | 2 | 7,164,002 | 7,164,130 | 6  | 0 | 0   | yes |    |
| at_locus.03681 | 2 | 7,168,366 | 7,168,458 | 5  | 0 | 0   | yes | TE |
| at_locus.03682 | 2 | 7,175,440 | 7,176,157 | 48 | 1 | 1   | no  | TE |

|                |   |           |           |     |    |     |     |    |
|----------------|---|-----------|-----------|-----|----|-----|-----|----|
| at_locus.03683 | 2 | 7,176,564 | 7,176,606 | 9   | 0  | 0   | no  | TE |
| at_locus.03684 | 2 | 7,182,845 | 7,182,952 | 5   | 0  | 0   | no  | TE |
| at_locus.03685 | 2 | 7,183,018 | 7,183,046 | 0   | 0  | 4   | no  | TE |
| at_locus.03686 | 2 | 7,183,179 | 7,183,944 | 25  | 0  | 1   | yes | TE |
| at_locus.03687 | 2 | 7,184,587 | 7,184,692 | 4   | 0  | 0   | no  | TE |
| at_locus.03688 | 2 | 7,185,458 | 7,185,677 | 9   | 0  | 0   | no  | TE |
| at_locus.03689 | 2 | 7,185,960 | 7,186,095 | 6   | 0  | 0   | no  | TE |
| at_locus.03690 | 2 | 7,189,705 | 7,190,016 | 7   | 0  | 0   | yes |    |
| at_locus.03691 | 2 | 7,190,755 | 7,190,969 | 17  | 1  | 9   | yes |    |
| at_locus.03692 | 2 | 7,191,473 | 7,192,262 | 81  | 0  | 0   | yes |    |
| at_locus.03693 | 2 | 7,197,920 | 7,198,617 | 12  | 74 | 27  | yes |    |
| at_locus.03694 | 2 | 7,200,468 | 7,200,537 | 4   | 0  | 0   | yes |    |
| at_locus.03695 | 2 | 7,210,566 | 7,211,920 | 36  | 0  | 29  | yes | TE |
| at_locus.03696 | 2 | 7,212,126 | 7,213,401 | 162 | 2  | 152 | yes | TE |
| at_locus.03697 | 2 | 7,233,063 | 7,233,095 | 0   | 0  | 4   | yes | TE |
| at_locus.03698 | 2 | 7,236,108 | 7,236,220 | 4   | 0  | 0   | yes | TE |
| at_locus.03699 | 2 | 7,237,610 | 7,237,698 | 4   | 0  | 0   | yes |    |
| at_locus.03700 | 2 | 7,253,919 | 7,254,025 | 4   | 0  | 1   | yes | TE |
| at_locus.03701 | 2 | 7,254,517 | 7,254,573 | 8   | 0  | 0   | yes |    |
| at_locus.03702 | 2 | 7,285,706 | 7,285,979 | 9   | 0  | 1   | yes |    |
| at_locus.03703 | 2 | 7,296,337 | 7,296,989 | 25  | 0  | 1   | no  | TE |
| at_locus.03704 | 2 | 7,297,357 | 7,297,675 | 4   | 1  | 10  | yes | TE |
| at_locus.03705 | 2 | 7,297,856 | 7,298,292 | 4   | 0  | 0   | no  | TE |
| at_locus.03706 | 2 | 7,298,618 | 7,298,726 | 4   | 0  | 0   | no  | TE |
| at_locus.03707 | 2 | 7,300,005 | 7,300,471 | 6   | 0  | 0   | yes | TE |
| at_locus.03708 | 2 | 7,300,951 | 7,301,705 | 19  | 1  | 15  | no  | TE |
| at_locus.03709 | 2 | 7,301,985 | 7,302,385 | 10  | 0  | 1   | yes | TE |
| at_locus.03710 | 2 | 7,306,080 | 7,306,484 | 7   | 0  | 12  | yes |    |
| at_locus.03711 | 2 | 7,335,077 | 7,335,592 | 21  | 1  | 9   | yes |    |
| at_locus.03712 | 2 | 7,347,465 | 7,348,022 | 34  | 0  | 0   | yes | TE |
| at_locus.03713 | 2 | 7,355,277 | 7,355,355 | 4   | 0  | 0   | yes | TE |
| at_locus.03714 | 2 | 7,355,842 | 7,356,569 | 69  | 2  | 38  | yes |    |
| at_locus.03715 | 2 | 7,358,394 | 7,358,627 | 7   | 0  | 0   | no  | TE |
| at_locus.03716 | 2 | 7,425,890 | 7,425,994 | 12  | 0  | 2   | no  | TE |
| at_locus.03717 | 2 | 7,426,317 | 7,426,461 | 15  | 0  | 0   | no  | TE |
| at_locus.03718 | 2 | 7,446,543 | 7,446,805 | 9   | 0  | 0   | no  | TE |
| at_locus.03719 | 2 | 7,449,526 | 7,449,615 | 9   | 2  | 0   | no  | TE |

|                |   |           |           |     |   |    |     |    |
|----------------|---|-----------|-----------|-----|---|----|-----|----|
| at_locus.03720 | 2 | 7,463,747 | 7,464,628 | 24  | 0 | 29 | yes |    |
| at_locus.03721 | 2 | 7,498,114 | 7,498,188 | 1   | 0 | 4  | yes |    |
| at_locus.03722 | 2 | 7,510,981 | 7,511,080 | 4   | 0 | 0  | yes |    |
| at_locus.03723 | 2 | 7,543,116 | 7,543,402 | 4   | 0 | 0  | yes | TE |
| at_locus.03724 | 2 | 7,545,575 | 7,545,699 | 4   | 0 | 0  | yes | TE |
| at_locus.03725 | 2 | 7,573,633 | 7,573,806 | 5   | 0 | 1  | no  | TE |
| at_locus.03726 | 2 | 7,588,556 | 7,589,022 | 6   | 0 | 0  | no  | TE |
| at_locus.03727 | 2 | 7,589,221 | 7,590,254 | 20  | 1 | 22 | yes | TE |
| at_locus.03728 | 2 | 7,590,519 | 7,591,260 | 21  | 0 | 1  | yes | TE |
| at_locus.03729 | 2 | 7,623,409 | 7,623,435 | 5   | 0 | 0  | yes |    |
| at_locus.03730 | 2 | 7,702,276 | 7,702,767 | 17  | 0 | 24 | yes |    |
| at_locus.03731 | 2 | 7,709,086 | 7,709,173 | 4   | 0 | 0  | yes |    |
| at_locus.03732 | 2 | 7,736,654 | 7,737,166 | 4   | 0 | 13 | yes |    |
| at_locus.03733 | 2 | 7,820,722 | 7,821,947 | 37  | 1 | 0  | no  | TE |
| at_locus.03734 | 2 | 7,851,662 | 7,851,722 | 22  | 0 | 1  | yes |    |
| at_locus.03735 | 2 | 7,882,231 | 7,882,396 | 8   | 0 | 0  | yes |    |
| at_locus.03736 | 2 | 7,912,054 | 7,912,243 | 5   | 0 | 0  | yes | TE |
| at_locus.03737 | 2 | 7,912,990 | 7,913,288 | 10  | 0 | 1  | yes | TE |
| at_locus.03738 | 2 | 7,963,150 | 7,963,499 | 26  | 0 | 1  | yes |    |
| at_locus.03739 | 2 | 7,966,892 | 7,967,095 | 4   | 0 | 0  | no  | TE |
| at_locus.03740 | 2 | 7,967,795 | 7,968,042 | 24  | 0 | 1  | yes | TE |
| at_locus.03741 | 2 | 7,968,352 | 7,968,642 | 40  | 3 | 0  | no  | TE |
| at_locus.03742 | 2 | 8,016,421 | 8,016,677 | 12  | 0 | 0  | yes |    |
| at_locus.03743 | 2 | 8,023,712 | 8,023,814 | 5   | 0 | 0  | yes |    |
| at_locus.03744 | 2 | 8,024,345 | 8,024,956 | 7   | 0 | 0  | yes |    |
| at_locus.03745 | 2 | 8,042,619 | 8,042,779 | 4   | 0 | 0  | no  | TE |
| at_locus.03746 | 2 | 8,043,137 | 8,043,289 | 5   | 0 | 0  | no  | TE |
| at_locus.03747 | 2 | 8,045,907 | 8,046,510 | 85  | 2 | 70 | yes | TE |
| at_locus.03748 | 2 | 8,046,695 | 8,047,916 | 111 | 2 | 67 | yes |    |
| at_locus.03749 | 2 | 8,049,012 | 8,049,050 | 6   | 0 | 0  | yes |    |
| at_locus.03750 | 2 | 8,053,054 | 8,053,351 | 16  | 0 | 1  | no  | TE |
| at_locus.03751 | 2 | 8,068,375 | 8,068,750 | 11  | 0 | 0  | yes | TE |
| at_locus.03752 | 2 | 8,074,073 | 8,074,113 | 9   | 1 | 4  | yes | TE |
| at_locus.03753 | 2 | 8,085,201 | 8,085,235 | 4   | 0 | 0  | no  | TE |
| at_locus.03754 | 2 | 8,109,664 | 8,110,551 | 18  | 0 | 0  | yes | TE |
| at_locus.03755 | 2 | 8,111,492 | 8,111,947 | 17  | 0 | 15 | yes |    |
| at_locus.03756 | 2 | 8,164,754 | 8,164,898 | 6   | 0 | 2  | yes |    |

|                |   |           |           |    |   |    |     |    |
|----------------|---|-----------|-----------|----|---|----|-----|----|
| at_locus.03757 | 2 | 8,180,657 | 8,180,780 | 7  | 0 | 0  | no  | TE |
| at_locus.03758 | 2 | 8,205,490 | 8,205,547 | 4  | 0 | 0  | yes |    |
| at_locus.03759 | 2 | 8,207,255 | 8,207,303 | 5  | 0 | 0  | yes |    |
| at_locus.03760 | 2 | 8,276,865 | 8,277,171 | 6  | 0 | 2  | yes | TE |
| at_locus.03761 | 2 | 8,281,350 | 8,281,479 | 8  | 0 | 0  | yes | TE |
| at_locus.03762 | 2 | 8,308,713 | 8,308,895 | 6  | 0 | 3  | yes |    |
| at_locus.03763 | 2 | 8,339,822 | 8,340,109 | 9  | 0 | 0  | yes |    |
| at_locus.03764 | 2 | 8,378,366 | 8,378,402 | 4  | 0 | 0  | yes |    |
| at_locus.03765 | 2 | 8,387,298 | 8,387,933 | 8  | 0 | 4  | no  | TE |
| at_locus.03766 | 2 | 8,389,518 | 8,389,742 | 4  | 0 | 0  | yes | TE |
| at_locus.03767 | 2 | 8,410,294 | 8,411,387 | 80 | 4 | 77 | yes |    |
| at_locus.03768 | 2 | 8,420,697 | 8,421,396 | 15 | 1 | 11 | yes |    |
| at_locus.03769 | 2 | 8,427,633 | 8,427,807 | 26 | 0 | 2  | no  | TE |
| at_locus.03770 | 2 | 8,428,634 | 8,429,039 | 5  | 0 | 6  | yes | TE |
| at_locus.03771 | 2 | 8,429,083 | 8,429,122 | 11 | 0 | 0  | yes | TE |
| at_locus.03772 | 2 | 8,429,380 | 8,429,926 | 12 | 0 | 0  | no  | TE |
| at_locus.03773 | 2 | 8,542,227 | 8,542,382 | 6  | 0 | 0  | yes |    |
| at_locus.03774 | 2 | 8,561,916 | 8,562,071 | 18 | 0 | 0  | no  | TE |
| at_locus.03775 | 2 | 8,562,712 | 8,562,884 | 42 | 2 | 2  | no  | TE |
| at_locus.03776 | 2 | 8,569,020 | 8,569,115 | 1  | 0 | 4  | yes | TE |
| at_locus.03777 | 2 | 8,570,807 | 8,570,840 | 0  | 0 | 5  | yes | TE |
| at_locus.03778 | 2 | 8,573,584 | 8,573,857 | 2  | 0 | 5  | yes | TE |
| at_locus.03779 | 2 | 8,586,035 | 8,586,184 | 5  | 0 | 0  | no  |    |
| at_locus.03780 | 2 | 8,634,072 | 8,634,180 | 4  | 0 | 0  | yes | TE |
| at_locus.03781 | 2 | 8,650,722 | 8,650,832 | 6  | 0 | 0  | yes |    |
| at_locus.03782 | 2 | 8,761,517 | 8,762,140 | 21 | 2 | 9  | yes |    |
| at_locus.03783 | 2 | 8,809,183 | 8,809,346 | 0  | 9 | 7  | yes |    |
| at_locus.03784 | 2 | 8,829,330 | 8,829,768 | 25 | 0 | 17 | yes |    |
| at_locus.03785 | 2 | 8,850,105 | 8,850,125 | 0  | 0 | 4  | yes |    |
| at_locus.03786 | 2 | 8,888,611 | 8,888,958 | 3  | 0 | 7  | yes |    |
| at_locus.03787 | 2 | 8,889,257 | 8,889,757 | 22 | 3 | 41 | yes |    |
| at_locus.03788 | 2 | 8,891,177 | 8,892,250 | 14 | 0 | 10 | yes | TE |
| at_locus.03789 | 2 | 8,900,731 | 8,900,966 | 10 | 0 | 0  | yes | TE |
| at_locus.03790 | 2 | 8,901,767 | 8,902,228 | 44 | 0 | 1  | no  | TE |
| at_locus.03791 | 2 | 8,914,752 | 8,915,188 | 8  | 0 | 0  | yes | TE |
| at_locus.03792 | 2 | 8,918,118 | 8,918,536 | 10 | 0 | 4  | yes |    |
| at_locus.03793 | 2 | 8,924,411 | 8,924,452 | 10 | 0 | 0  | yes | TE |

|                |   |           |           |    |    |    |     |    |
|----------------|---|-----------|-----------|----|----|----|-----|----|
| at_locus.03795 | 2 | 9,012,726 | 9,012,899 | 15 | 0  | 0  | yes | TE |
| at_locus.03796 | 2 | 9,027,436 | 9,027,574 | 4  | 0  | 0  | yes | TE |
| at_locus.03797 | 2 | 9,032,688 | 9,032,861 | 5  | 0  | 0  | yes |    |
| at_locus.03798 | 2 | 9,036,890 | 9,036,976 | 5  | 0  | 0  | no  | TE |
| at_locus.03799 | 2 | 9,037,634 | 9,037,754 | 6  | 0  | 0  | no  | TE |
| at_locus.03800 | 2 | 9,054,965 | 9,054,997 | 5  | 0  | 1  | no  |    |
| at_locus.03801 | 2 | 9,055,511 | 9,055,677 | 5  | 1  | 0  | yes |    |
| at_locus.03802 | 2 | 9,064,332 | 9,065,117 | 15 | 0  | 3  | no  | TE |
| at_locus.03803 | 2 | 9,065,475 | 9,066,884 | 23 | 2  | 8  | yes | TE |
| at_locus.03804 | 2 | 9,070,258 | 9,070,408 | 9  | 0  | 0  | no  | TE |
| at_locus.03805 | 2 | 9,070,620 | 9,070,713 | 8  | 0  | 2  | no  |    |
| at_locus.03806 | 2 | 9,070,977 | 9,071,346 | 22 | 1  | 0  | no  |    |
| at_locus.03807 | 2 | 9,129,206 | 9,129,523 | 1  | 0  | 4  | no  | TE |
| at_locus.03808 | 2 | 9,132,545 | 9,133,055 | 1  | 0  | 5  | yes | TE |
| at_locus.03809 | 2 | 9,199,370 | 9,199,454 | 4  | 0  | 1  | yes | TE |
| at_locus.03810 | 2 | 9,199,623 | 9,200,750 | 26 | 0  | 13 | yes | TE |
| at_locus.03811 | 2 | 9,204,159 | 9,204,243 | 6  | 0  | 0  | yes | TE |
| at_locus.03812 | 2 | 9,232,558 | 9,233,039 | 15 | 1  | 1  | no  | TE |
| at_locus.03813 | 2 | 9,235,719 | 9,235,743 | 4  | 0  | 0  | no  | TE |
| at_locus.03814 | 2 | 9,236,217 | 9,236,257 | 4  | 0  | 0  | no  | TE |
| at_locus.03815 | 2 | 9,269,627 | 9,269,650 | 4  | 0  | 0  | no  |    |
| at_locus.03816 | 2 | 9,272,424 | 9,272,915 | 9  | 21 | 6  | yes |    |
| at_locus.03817 | 2 | 9,296,795 | 9,297,059 | 4  | 0  | 0  | no  |    |
| at_locus.03818 | 2 | 9,318,554 | 9,318,866 | 11 | 0  | 1  | yes | TE |
| at_locus.03819 | 2 | 9,319,156 | 9,319,401 | 2  | 0  | 3  | yes | TE |
| at_locus.03820 | 2 | 9,319,665 | 9,320,039 | 7  | 0  | 19 | yes | TE |
| at_locus.03821 | 2 | 9,321,868 | 9,322,197 | 8  | 0  | 1  | yes | TE |
| at_locus.03822 | 2 | 9,337,711 | 9,337,876 | 9  | 0  | 0  | yes | TE |
| at_locus.03823 | 2 | 9,351,764 | 9,352,108 | 6  | 0  | 1  | yes |    |
| at_locus.03824 | 2 | 9,432,230 | 9,432,626 | 15 | 0  | 8  | yes |    |
| at_locus.03825 | 2 | 9,440,173 | 9,440,261 | 32 | 0  | 0  | no  | TE |
| at_locus.03826 | 2 | 9,440,503 | 9,440,651 | 14 | 0  | 0  | no  | TE |
| at_locus.03827 | 2 | 9,463,068 | 9,463,270 | 15 | 0  | 0  | yes | TE |
| at_locus.03828 | 2 | 9,491,695 | 9,491,769 | 4  | 0  | 0  | yes | TE |
| at_locus.03829 | 2 | 9,491,978 | 9,492,262 | 4  | 0  | 0  | yes | TE |
| at_locus.03830 | 2 | 9,493,668 | 9,494,220 | 6  | 0  | 1  | yes |    |
| at_locus.03831 | 2 | 9,503,885 | 9,503,984 | 11 | 0  | 2  | yes | TE |

|                |   |            |            |    |    |    |     |    |
|----------------|---|------------|------------|----|----|----|-----|----|
| at_locus.03832 | 2 | 9,535,928  | 9,536,034  | 4  | 0  | 1  | yes | TE |
| at_locus.03833 | 2 | 9,567,435  | 9,567,636  | 0  | 4  | 13 | yes |    |
| at_locus.03834 | 2 | 9,599,022  | 9,599,219  | 5  | 0  | 0  | no  |    |
| at_locus.03835 | 2 | 9,601,732  | 9,603,116  | 11 | 0  | 5  | yes | TE |
| at_locus.03836 | 2 | 9,640,636  | 9,640,781  | 58 | 2  | 4  | no  | TE |
| at_locus.03837 | 2 | 9,642,047  | 9,642,200  | 16 | 0  | 0  | no  | TE |
| at_locus.03838 | 2 | 9,646,045  | 9,646,220  | 9  | 0  | 2  | yes |    |
| at_locus.03839 | 2 | 9,651,359  | 9,651,382  | 4  | 0  | 0  | yes | TE |
| at_locus.03840 | 2 | 9,661,449  | 9,661,930  | 1  | 0  | 5  | yes |    |
| at_locus.03841 | 2 | 9,662,297  | 9,663,535  | 38 | 1  | 6  | no  | TE |
| at_locus.03842 | 2 | 9,699,318  | 9,700,344  | 3  | 2  | 2  | yes |    |
| at_locus.03843 | 2 | 9,720,225  | 9,720,472  | 7  | 0  | 0  | yes | TE |
| at_locus.03844 | 2 | 9,770,239  | 9,770,471  | 0  | 0  | 5  | yes | TE |
| at_locus.03845 | 2 | 9,837,914  | 9,838,318  | 6  | 0  | 7  | yes |    |
| at_locus.03846 | 2 | 9,862,453  | 9,862,581  | 5  | 0  | 1  | yes |    |
| at_locus.03847 | 2 | 9,867,108  | 9,867,190  | 10 | 0  | 0  | no  | TE |
| at_locus.03848 | 2 | 9,867,514  | 9,867,592  | 7  | 0  | 0  | no  | TE |
| at_locus.03849 | 2 | 9,892,295  | 9,892,524  | 4  | 0  | 0  | yes | TE |
| at_locus.03850 | 2 | 9,898,416  | 9,898,653  | 6  | 0  | 0  | no  | TE |
| at_locus.03851 | 2 | 9,903,666  | 9,903,909  | 24 | 0  | 1  | yes | TE |
| at_locus.03852 | 2 | 9,904,331  | 9,904,523  | 57 | 1  | 1  | yes | TE |
| at_locus.03853 | 2 | 9,929,747  | 9,929,873  | 7  | 0  | 1  | yes | TE |
| at_locus.03854 | 2 | 9,949,282  | 9,949,363  | 1  | 5  | 3  | yes |    |
| at_locus.03855 | 2 | 9,954,463  | 9,954,626  | 4  | 0  | 0  | yes |    |
| at_locus.03856 | 2 | 9,993,629  | 9,993,653  | 16 | 29 | 6  | yes |    |
| at_locus.03857 | 2 | 10,008,974 | 10,010,074 | 1  | 0  | 10 | yes | TE |
| at_locus.03858 | 2 | 10,010,305 | 10,010,492 | 1  | 2  | 5  | no  | TE |
| at_locus.03859 | 2 | 10,011,251 | 10,011,623 | 5  | 0  | 1  | yes | TE |
| at_locus.03860 | 2 | 10,012,824 | 10,013,138 | 5  | 0  | 4  | no  | TE |
| at_locus.03861 | 2 | 10,013,496 | 10,013,584 | 5  | 0  | 2  | yes | TE |
| at_locus.03862 | 2 | 10,025,248 | 10,025,322 | 25 | 0  | 2  | no  | TE |
| at_locus.03863 | 2 | 10,025,697 | 10,025,741 | 5  | 0  | 1  | no  | TE |
| at_locus.03864 | 2 | 10,026,137 | 10,027,316 | 32 | 0  | 7  | yes | TE |
| at_locus.03865 | 2 | 10,034,038 | 10,034,131 | 2  | 11 | 6  | yes |    |
| at_locus.03866 | 2 | 10,045,000 | 10,045,255 | 7  | 0  | 0  | yes |    |
| at_locus.03867 | 2 | 10,077,182 | 10,077,305 | 4  | 0  | 0  | no  | TE |
| at_locus.03868 | 2 | 10,077,956 | 10,078,042 | 6  | 0  | 0  | yes | TE |

|                |   |            |            |    |    |    |     |    |
|----------------|---|------------|------------|----|----|----|-----|----|
| at_locus.03869 | 2 | 10,093,124 | 10,093,323 | 0  | 0  | 4  | no  | TE |
| at_locus.03870 | 2 | 10,093,699 | 10,094,209 | 3  | 1  | 8  | no  | TE |
| at_locus.03871 | 2 | 10,094,628 | 10,095,262 | 3  | 1  | 7  | yes | TE |
| at_locus.03872 | 2 | 10,095,830 | 10,096,070 | 4  | 0  | 0  | no  | TE |
| at_locus.03873 | 2 | 10,096,170 | 10,096,705 | 4  | 0  | 9  | no  | TE |
| at_locus.03874 | 2 | 10,096,871 | 10,097,595 | 11 | 0  | 6  | no  | TE |
| at_locus.03875 | 2 | 10,098,381 | 10,098,850 | 1  | 0  | 5  | yes | TE |
| at_locus.03876 | 2 | 10,099,267 | 10,099,730 | 2  | 0  | 5  | no  | TE |
| at_locus.03877 | 2 | 10,100,346 | 10,100,640 | 11 | 0  | 6  | yes | TE |
| at_locus.03878 | 2 | 10,158,928 | 10,159,066 | 4  | 0  | 1  | no  |    |
| at_locus.03879 | 2 | 10,159,292 | 10,159,394 | 13 | 0  | 2  | yes |    |
| at_locus.03880 | 2 | 10,201,763 | 10,202,032 | 11 | 0  | 0  | yes |    |
| at_locus.03881 | 2 | 10,246,506 | 10,246,563 | 8  | 0  | 1  | yes | TE |
| at_locus.03882 | 2 | 10,262,466 | 10,262,497 | 11 | 0  | 1  | no  | TE |
| at_locus.03883 | 2 | 10,262,725 | 10,262,867 | 20 | 0  | 1  | yes | TE |
| at_locus.03884 | 2 | 10,324,883 | 10,325,600 | 15 | 0  | 2  | yes | TE |
| at_locus.03885 | 2 | 10,358,662 | 10,358,742 | 10 | 0  | 1  | no  | TE |
| at_locus.03886 | 2 | 10,375,936 | 10,376,109 | 2  | 0  | 4  | yes | TE |
| at_locus.03887 | 2 | 10,418,799 | 10,418,967 | 0  | 0  | 4  | yes |    |
| at_locus.03888 | 2 | 10,441,646 | 10,441,978 | 17 | 0  | 2  | yes |    |
| at_locus.03889 | 2 | 10,443,774 | 10,444,316 | 13 | 0  | 5  | yes | TE |
| at_locus.03890 | 2 | 10,472,704 | 10,472,911 | 4  | 0  | 0  | yes | TE |
| at_locus.03891 | 2 | 10,474,451 | 10,474,851 | 4  | 0  | 2  | yes | TE |
| at_locus.03892 | 2 | 10,475,212 | 10,475,458 | 7  | 0  | 1  | no  | TE |
| at_locus.03893 | 2 | 10,549,148 | 10,549,196 | 0  | 0  | 4  | yes |    |
| at_locus.03894 | 2 | 10,556,874 | 10,557,271 | 12 | 0  | 0  | yes |    |
| at_locus.03895 | 2 | 10,573,336 | 10,573,572 | 10 | 0  | 2  | no  |    |
| at_locus.03896 | 2 | 10,577,241 | 10,577,553 | 10 | 0  | 20 | yes |    |
| at_locus.03897 | 2 | 10,599,273 | 10,600,106 | 13 | 0  | 11 | no  | TE |
| at_locus.03898 | 2 | 10,601,819 | 10,602,261 | 4  | 0  | 1  | yes | TE |
| at_locus.03899 | 2 | 10,607,004 | 10,607,182 | 0  | 0  | 4  | yes | TE |
| at_locus.03900 | 2 | 10,608,556 | 10,608,709 | 0  | 0  | 5  | yes | TE |
| at_locus.03901 | 2 | 10,612,648 | 10,613,225 | 1  | 0  | 7  | yes | TE |
| at_locus.03902 | 2 | 10,630,129 | 10,631,128 | 4  | 1  | 4  | no  |    |
| at_locus.03903 | 2 | 10,649,114 | 10,649,342 | 4  | 0  | 0  | yes |    |
| at_locus.03904 | 2 | 10,683,549 | 10,683,632 | 29 | 65 | 11 | yes |    |
| at_locus.03905 | 2 | 10,685,263 | 10,685,526 | 6  | 0  | 0  | yes | TE |



|                |   |            |            |     |   |    |     |    |
|----------------|---|------------|------------|-----|---|----|-----|----|
| at_locus.03906 | 2 | 10,689,845 | 10,689,923 | 5   | 0 | 0  | no  | TE |
| at_locus.03907 | 2 | 10,690,133 | 10,690,701 | 10  | 0 | 1  | no  | TE |
| at_locus.03908 | 2 | 10,694,123 | 10,694,200 | 9   | 0 | 0  | yes |    |
| at_locus.03909 | 2 | 10,739,469 | 10,739,514 | 4   | 0 | 0  | yes | TE |
| at_locus.03910 | 2 | 10,768,139 | 10,768,179 | 0   | 0 | 4  | no  | TE |
| at_locus.03911 | 2 | 10,813,829 | 10,814,030 | 6   | 0 | 2  | yes |    |
| at_locus.03912 | 2 | 10,814,409 | 10,814,607 | 10  | 0 | 1  | no  |    |
| at_locus.03913 | 2 | 10,821,454 | 10,822,181 | 9   | 0 | 15 | yes |    |
| at_locus.03914 | 2 | 10,882,507 | 10,883,139 | 5   | 0 | 13 | no  | TE |
| at_locus.03915 | 2 | 10,883,593 | 10,883,756 | 6   | 0 | 0  | no  | TE |
| at_locus.03916 | 2 | 10,883,783 | 10,884,575 | 7   | 0 | 11 | no  | TE |
| at_locus.03917 | 2 | 10,885,681 | 10,885,715 | 4   | 0 | 0  | no  | TE |
| at_locus.03918 | 2 | 10,886,003 | 10,886,605 | 15  | 0 | 3  | no  | TE |
| at_locus.03919 | 2 | 10,886,882 | 10,887,283 | 14  | 0 | 1  | no  | TE |
| at_locus.03920 | 2 | 10,938,683 | 10,939,541 | 15  | 0 | 11 | yes | TE |
| at_locus.03921 | 2 | 10,980,793 | 10,980,887 | 7   | 0 | 0  | yes |    |
| at_locus.03922 | 2 | 11,003,259 | 11,003,398 | 8   | 0 | 1  | yes | TE |
| at_locus.03923 | 2 | 11,050,253 | 11,050,759 | 41  | 0 | 24 | yes |    |
| at_locus.03924 | 2 | 11,051,045 | 11,051,250 | 8   | 0 | 5  | yes |    |
| at_locus.03925 | 2 | 11,051,465 | 11,051,819 | 4   | 0 | 6  | yes |    |
| at_locus.03926 | 2 | 11,052,111 | 11,052,473 | 113 | 6 | 92 | yes |    |
| at_locus.03927 | 2 | 11,054,211 | 11,054,777 | 35  | 1 | 0  | yes |    |
| at_locus.03928 | 2 | 11,065,386 | 11,065,461 | 11  | 1 | 0  | yes |    |
| at_locus.03929 | 2 | 11,083,029 | 11,083,203 | 8   | 0 | 0  | yes |    |
| at_locus.03930 | 2 | 11,171,071 | 11,171,201 | 5   | 0 | 0  | yes | TE |
| at_locus.03931 | 2 | 11,184,201 | 11,184,280 | 16  | 0 | 0  | yes |    |
| at_locus.03932 | 2 | 11,274,025 | 11,274,206 | 1   | 0 | 5  | no  | TE |
| at_locus.03933 | 2 | 11,292,195 | 11,292,441 | 18  | 0 | 0  | no  | TE |
| at_locus.03934 | 2 | 11,292,675 | 11,293,515 | 29  | 0 | 0  | no  | TE |
| at_locus.03935 | 2 | 11,294,154 | 11,294,239 | 16  | 0 | 0  | no  | TE |
| at_locus.03936 | 2 | 11,322,875 | 11,322,935 | 9   | 0 | 0  | yes |    |
| at_locus.03937 | 2 | 11,353,036 | 11,353,187 | 6   | 0 | 2  | yes |    |
| at_locus.03938 | 2 | 11,406,224 | 11,406,455 | 11  | 0 | 0  | no  | TE |
| at_locus.03939 | 2 | 11,416,154 | 11,416,335 | 4   | 0 | 6  | yes |    |
| at_locus.03940 | 2 | 11,510,659 | 11,510,896 | 12  | 0 | 1  | yes | TE |
| at_locus.03941 | 2 | 11,557,106 | 11,557,340 | 13  | 0 | 0  | yes |    |
| at_locus.03942 | 2 | 11,563,290 | 11,563,368 | 10  | 0 | 2  | no  | TE |

|                |   |            |            |     |     |     |     |    |
|----------------|---|------------|------------|-----|-----|-----|-----|----|
| at_locus.03943 | 2 | 11,604,401 | 11,604,860 | 23  | 0   | 1   | no  | TE |
| at_locus.03944 | 2 | 11,626,388 | 11,626,486 | 4   | 0   | 1   | yes |    |
| at_locus.03945 | 2 | 11,630,893 | 11,631,137 | 8   | 0   | 0   | yes |    |
| at_locus.03946 | 2 | 11,728,716 | 11,729,168 | 247 | 581 | 171 | yes |    |
| at_locus.03947 | 2 | 11,747,021 | 11,747,192 | 13  | 0   | 0   | yes |    |
| at_locus.03948 | 2 | 11,767,275 | 11,767,438 | 5   | 0   | 1   | yes |    |
| at_locus.03949 | 2 | 11,775,916 | 11,776,238 | 72  | 0   | 1   | no  |    |
| at_locus.03950 | 2 | 11,819,964 | 11,819,993 | 5   | 0   | 0   | yes |    |
| at_locus.03951 | 2 | 11,874,410 | 11,874,908 | 8   | 0   | 2   | yes | TE |
| at_locus.03952 | 2 | 11,915,956 | 11,916,073 | 11  | 0   | 0   | no  | TE |
| at_locus.03953 | 2 | 11,916,768 | 11,916,795 | 4   | 0   | 0   | no  | TE |
| at_locus.03954 | 2 | 11,949,987 | 11,950,088 | 38  | 68  | 145 | yes |    |
| at_locus.03955 | 2 | 11,960,227 | 11,960,281 | 5   | 1   | 0   | yes |    |
| at_locus.03956 | 2 | 11,990,048 | 11,990,909 | 31  | 0   | 9   | no  | TE |
| at_locus.03957 | 2 | 11,999,428 | 11,999,828 | 21  | 0   | 3   | yes |    |
| at_locus.03958 | 2 | 12,000,139 | 12,000,474 | 97  | 2   | 47  | yes |    |
| at_locus.03959 | 2 | 12,083,124 | 12,083,287 | 8   | 0   | 0   | yes |    |
| at_locus.03960 | 2 | 12,099,564 | 12,100,262 | 63  | 4   | 2   | no  | TE |
| at_locus.03961 | 2 | 12,100,488 | 12,100,783 | 11  | 0   | 0   | no  | TE |
| at_locus.03962 | 2 | 12,157,320 | 12,157,851 | 22  | 1   | 5   | yes |    |
| at_locus.03963 | 2 | 12,181,654 | 12,182,199 | 7   | 0   | 2   | yes |    |
| at_locus.03964 | 2 | 12,209,386 | 12,209,595 | 5   | 1   | 0   | yes |    |
| at_locus.03965 | 2 | 12,250,133 | 12,250,325 | 13  | 0   | 0   | yes |    |
| at_locus.03966 | 2 | 12,263,217 | 12,263,311 | 7   | 1   | 0   | yes |    |
| at_locus.03967 | 2 | 12,316,978 | 12,317,232 | 8   | 0   | 0   | yes |    |
| at_locus.03968 | 2 | 12,340,173 | 12,340,191 | 6   | 11  | 17  | no  |    |
| at_locus.03969 | 2 | 12,342,133 | 12,342,151 | 6   | 11  | 17  | no  |    |
| at_locus.03970 | 2 | 12,342,824 | 12,342,840 | 1   | 1   | 7   | no  |    |
| at_locus.03971 | 2 | 12,379,748 | 12,379,879 | 4   | 0   | 0   | yes |    |
| at_locus.03972 | 2 | 12,420,857 | 12,421,023 | 4   | 0   | 0   | yes | TE |
| at_locus.03973 | 2 | 12,561,207 | 12,561,614 | 19  | 0   | 0   | no  | TE |
| at_locus.03974 | 2 | 12,561,967 | 12,562,336 | 10  | 2   | 1   | yes | TE |
| at_locus.03975 | 2 | 12,573,230 | 12,573,537 | 13  | 0   | 1   | no  | TE |
| at_locus.03976 | 2 | 12,573,802 | 12,574,106 | 4   | 0   | 4   | no  | TE |
| at_locus.03977 | 2 | 12,575,550 | 12,576,286 | 8   | 0   | 10  | no  | TE |
| at_locus.03978 | 2 | 12,577,777 | 12,578,415 | 1   | 0   | 8   | no  | TE |
| at_locus.03979 | 2 | 12,578,808 | 12,579,218 | 1   | 1   | 5   | no  | TE |

|                |   |            |            |    |    |    |     |    |
|----------------|---|------------|------------|----|----|----|-----|----|
| at_locus.03980 | 2 | 12,580,009 | 12,580,625 | 7  | 0  | 5  | no  | TE |
| at_locus.03981 | 2 | 12,581,150 | 12,581,910 | 18 | 0  | 5  | no  | TE |
| at_locus.03982 | 2 | 12,582,662 | 12,582,956 | 1  | 0  | 5  | no  | TE |
| at_locus.03983 | 2 | 12,583,480 | 12,583,808 | 4  | 0  | 0  | no  | TE |
| at_locus.03984 | 2 | 12,584,076 | 12,584,391 | 5  | 0  | 0  | no  | TE |
| at_locus.03985 | 2 | 12,584,656 | 12,584,839 | 5  | 0  | 2  | no  | TE |
| at_locus.03986 | 2 | 12,666,769 | 12,667,157 | 1  | 0  | 5  | yes |    |
| at_locus.03987 | 2 | 12,715,629 | 12,716,040 | 6  | 0  | 1  | yes |    |
| at_locus.03988 | 2 | 12,732,610 | 12,732,692 | 6  | 0  | 0  | yes |    |
| at_locus.03989 | 2 | 12,746,476 | 12,747,340 | 24 | 0  | 9  | yes | TE |
| at_locus.03990 | 2 | 12,761,488 | 12,761,659 | 0  | 0  | 6  | yes |    |
| at_locus.03991 | 2 | 12,762,122 | 12,762,346 | 3  | 0  | 5  | yes |    |
| at_locus.03992 | 2 | 12,774,216 | 12,774,362 | 1  | 3  | 0  | yes |    |
| at_locus.03993 | 2 | 12,787,754 | 12,787,873 | 4  | 0  | 0  | no  |    |
| at_locus.03994 | 2 | 12,808,090 | 12,808,156 | 6  | 0  | 0  | no  | TE |
| at_locus.03995 | 2 | 12,808,780 | 12,809,502 | 15 | 0  | 0  | no  | TE |
| at_locus.03996 | 2 | 12,809,737 | 12,810,175 | 8  | 1  | 0  | yes | TE |
| at_locus.03997 | 2 | 12,816,765 | 12,816,863 | 4  | 0  | 0  | no  | TE |
| at_locus.03998 | 2 | 12,817,125 | 12,817,218 | 8  | 0  | 2  | no  |    |
| at_locus.03999 | 2 | 12,817,479 | 12,817,836 | 22 | 0  | 1  | no  |    |
| at_locus.04000 | 2 | 12,818,822 | 12,819,023 | 4  | 0  | 0  | yes | TE |
| at_locus.04001 | 2 | 12,819,215 | 12,820,100 | 41 | 1  | 12 | yes | TE |
| at_locus.04002 | 2 | 12,986,810 | 12,986,879 | 11 | 1  | 0  | yes |    |
| at_locus.04003 | 2 | 13,009,112 | 13,009,149 | 1  | 0  | 0  | no  |    |
| at_locus.04004 | 2 | 13,026,533 | 13,026,682 | 4  | 3  | 0  | yes |    |
| at_locus.04005 | 2 | 13,049,063 | 13,049,279 | 2  | 0  | 5  | yes |    |
| at_locus.04006 | 2 | 13,108,910 | 13,109,435 | 25 | 0  | 0  | no  | TE |
| at_locus.04008 | 2 | 13,230,370 | 13,230,683 | 0  | 0  | 5  | yes | TE |
| at_locus.04009 | 2 | 13,232,445 | 13,232,661 | 2  | 0  | 4  | yes | TE |
| at_locus.04010 | 2 | 13,274,700 | 13,275,012 | 12 | 2  | 0  | no  | TE |
| at_locus.04011 | 2 | 13,275,241 | 13,275,555 | 14 | 0  | 0  | yes | TE |
| at_locus.04012 | 2 | 13,275,929 | 13,276,084 | 15 | 0  | 0  | no  | TE |
| at_locus.04013 | 2 | 13,278,990 | 13,279,218 | 4  | 17 | 1  | yes |    |
| at_locus.04014 | 2 | 13,307,422 | 13,307,509 | 8  | 0  | 2  | yes |    |
| at_locus.04015 | 2 | 13,343,123 | 13,343,157 | 10 | 0  | 0  | no  | TE |
| at_locus.04016 | 2 | 13,343,431 | 13,344,462 | 36 | 1  | 0  | yes | TE |
| at_locus.04017 | 2 | 13,345,069 | 13,345,206 | 12 | 0  | 0  | yes | TE |

|                |   |            |            |    |   |    |     |    |
|----------------|---|------------|------------|----|---|----|-----|----|
| at_locus.04018 | 2 | 13,381,646 | 13,381,757 | 4  | 0 | 0  | yes |    |
| at_locus.04019 | 2 | 13,382,285 | 13,382,343 | 11 | 0 | 0  | yes |    |
| at_locus.04020 | 2 | 13,411,482 | 13,411,647 | 15 | 1 | 0  | yes |    |
| at_locus.04021 | 2 | 13,429,024 | 13,429,425 | 15 | 0 | 1  | no  | TE |
| at_locus.04022 | 2 | 13,429,702 | 13,430,304 | 15 | 0 | 3  | no  | TE |
| at_locus.04023 | 2 | 13,430,592 | 13,430,626 | 4  | 0 | 0  | no  | TE |
| at_locus.04024 | 2 | 13,431,732 | 13,432,524 | 7  | 0 | 12 | no  | TE |
| at_locus.04025 | 2 | 13,432,551 | 13,432,714 | 6  | 0 | 0  | no  | TE |
| at_locus.04026 | 2 | 13,433,168 | 13,433,547 | 5  | 0 | 11 | no  | TE |
| at_locus.04027 | 2 | 13,440,133 | 13,440,320 | 6  | 0 | 0  | yes |    |
| at_locus.04028 | 2 | 13,536,876 | 13,537,111 | 0  | 4 | 0  | yes |    |
| at_locus.04029 | 2 | 13,641,152 | 13,641,290 | 27 | 0 | 0  | no  | TE |
| at_locus.04030 | 2 | 13,641,497 | 13,641,804 | 7  | 0 | 1  | yes | TE |
| at_locus.04031 | 2 | 13,800,813 | 13,801,212 | 6  | 0 | 0  | yes | TE |
| at_locus.04032 | 2 | 13,815,072 | 13,815,193 | 4  | 0 | 0  | yes |    |
| at_locus.04033 | 2 | 13,893,015 | 13,893,600 | 28 | 0 | 0  | yes | TE |
| at_locus.04034 | 2 | 13,913,966 | 13,915,035 | 63 | 1 | 1  | no  | TE |
| at_locus.04035 | 2 | 13,915,713 | 13,915,798 | 16 | 0 | 0  | no  | TE |
| at_locus.04036 | 2 | 14,016,533 | 14,016,652 | 4  | 0 | 2  | yes |    |
| at_locus.04037 | 2 | 14,016,872 | 14,017,202 | 9  | 0 | 6  | yes |    |
| at_locus.04038 | 2 | 14,341,570 | 14,342,132 | 43 | 4 | 2  | no  | TE |
| at_locus.04039 | 2 | 14,342,427 | 14,342,588 | 4  | 0 | 0  | no  | TE |
| at_locus.04040 | 2 | 14,370,812 | 14,370,985 | 7  | 1 | 0  | yes |    |
| at_locus.04041 | 2 | 14,393,758 | 14,394,133 | 9  | 0 | 0  | yes |    |
| at_locus.04042 | 2 | 14,416,721 | 14,417,248 | 4  | 0 | 1  | no  | TE |
| at_locus.04043 | 2 | 14,417,542 | 14,417,975 | 2  | 0 | 5  | no  | TE |
| at_locus.04044 | 2 | 14,418,345 | 14,418,783 | 1  | 0 | 5  | yes | TE |
| at_locus.04045 | 2 | 14,424,157 | 14,424,210 | 6  | 0 | 3  | yes | TE |
| at_locus.04046 | 2 | 14,425,570 | 14,425,612 | 5  | 0 | 0  | yes | TE |
| at_locus.04047 | 2 | 14,464,395 | 14,464,624 | 7  | 0 | 1  | yes | TE |
| at_locus.04048 | 2 | 14,479,620 | 14,480,102 | 12 | 0 | 8  | yes |    |
| at_locus.04049 | 2 | 14,560,879 | 14,561,188 | 8  | 0 | 1  | yes | TE |
| at_locus.04050 | 2 | 14,602,125 | 14,602,300 | 6  | 0 | 0  | no  |    |
| at_locus.04051 | 2 | 14,639,500 | 14,639,607 | 5  | 0 | 0  | yes |    |
| at_locus.04052 | 2 | 14,689,987 | 14,690,348 | 7  | 0 | 1  | no  | TE |
| at_locus.04053 | 2 | 14,690,572 | 14,690,700 | 5  | 0 | 2  | no  | TE |
| at_locus.04054 | 2 | 14,867,712 | 14,867,883 | 4  | 0 | 2  | yes |    |

|                |   |            |            |     |     |     |     |    |
|----------------|---|------------|------------|-----|-----|-----|-----|----|
| at_locus.04056 | 2 | 14,959,031 | 14,959,893 | 19  | 0   | 4   | yes | TE |
| at_locus.04058 | 2 | 15,104,876 | 15,105,038 | 6   | 0   | 0   | yes |    |
| at_locus.04059 | 2 | 15,117,123 | 15,117,383 | 11  | 0   | 0   | yes |    |
| at_locus.04060 | 2 | 15,137,770 | 15,137,957 | 1   | 0   | 5   | yes | TE |
| at_locus.04061 | 2 | 15,141,361 | 15,141,849 | 14  | 0   | 1   | no  | TE |
| at_locus.04062 | 2 | 15,147,832 | 15,147,865 | 11  | 0   | 0   | no  |    |
| at_locus.04063 | 2 | 15,148,292 | 15,148,378 | 8   | 0   | 2   | yes | TE |
| at_locus.04064 | 2 | 15,197,582 | 15,197,754 | 6   | 0   | 0   | yes |    |
| at_locus.04066 | 2 | 15,280,847 | 15,281,191 | 10  | 0   | 0   | yes | TE |
| at_locus.04067 | 2 | 15,315,678 | 15,315,752 | 6   | 0   | 9   | yes |    |
| at_locus.04068 | 2 | 15,378,880 | 15,378,930 | 10  | 0   | 0   | no  | TE |
| at_locus.04069 | 2 | 15,409,198 | 15,409,305 | 14  | 0   | 0   | yes |    |
| at_locus.04070 | 2 | 15,455,887 | 15,456,164 | 14  | 0   | 0   | yes |    |
| at_locus.04071 | 2 | 15,573,998 | 15,574,426 | 42  | 0   | 1   | no  | TE |
| at_locus.04072 | 2 | 15,574,703 | 15,574,981 | 11  | 0   | 0   | no  | TE |
| at_locus.04073 | 2 | 15,581,325 | 15,581,599 | 3   | 0   | 0   | yes |    |
| at_locus.04074 | 2 | 15,581,828 | 15,582,103 | 4   | 1   | 0   | yes |    |
| at_locus.04075 | 2 | 15,603,719 | 15,604,137 | 5   | 0   | 2   | no  | TE |
| at_locus.04076 | 2 | 15,729,316 | 15,729,447 | 5   | 14  | 6   | yes |    |
| at_locus.04077 | 2 | 15,740,579 | 15,740,923 | 5   | 0   | 1   | yes |    |
| at_locus.04078 | 2 | 15,798,310 | 15,798,478 | 8   | 0   | 0   | yes |    |
| at_locus.04079 | 2 | 15,828,458 | 15,828,734 | 12  | 2   | 0   | yes |    |
| at_locus.04080 | 2 | 15,857,813 | 15,858,365 | 26  | 1   | 35  | yes |    |
| at_locus.04081 | 2 | 15,887,683 | 15,887,899 | 10  | 0   | 12  | yes |    |
| at_locus.04082 | 2 | 15,888,507 | 15,888,818 | 3   | 0   | 7   | yes |    |
| at_locus.04083 | 2 | 15,897,522 | 15,897,547 | 0   | 1   | 7   | yes |    |
| at_locus.04085 | 2 | 16,010,769 | 16,010,873 | 19  | 0   | 1   | yes |    |
| at_locus.04086 | 2 | 16,011,121 | 16,011,412 | 13  | 0   | 5   | no  |    |
| at_locus.04087 | 2 | 16,015,045 | 16,015,149 | 8   | 0   | 2   | yes |    |
| at_locus.04088 | 2 | 16,015,397 | 16,015,689 | 13  | 0   | 5   | no  |    |
| at_locus.04089 | 2 | 16,034,707 | 16,034,931 | 7   | 0   | 6   | yes |    |
| at_locus.04090 | 2 | 16,038,236 | 16,039,004 | 55  | 0   | 51  | yes |    |
| at_locus.04091 | 2 | 16,069,045 | 16,069,122 | 298 | 681 | 191 | yes |    |
| at_locus.04092 | 2 | 16,150,586 | 16,150,632 | 4   | 0   | 0   | yes |    |
| at_locus.04093 | 2 | 16,157,493 | 16,158,226 | 13  | 2   | 2   | yes | TE |
| at_locus.04094 | 2 | 16,179,668 | 16,180,285 | 13  | 0   | 23  | yes |    |
| at_locus.04095 | 2 | 16,279,911 | 16,280,063 | 8   | 0   | 7   | yes |    |

|                |   |            |            |     |     |     |     |    |
|----------------|---|------------|------------|-----|-----|-----|-----|----|
| at_locus.04096 | 2 | 16,340,560 | 16,341,027 | 11  | 0   | 4   | yes |    |
| at_locus.04097 | 2 | 16,347,359 | 16,347,443 | 119 | 125 | 40  | yes |    |
| at_locus.04098 | 2 | 16,386,611 | 16,386,820 | 33  | 1   | 1   | yes | TE |
| at_locus.04099 | 2 | 16,429,581 | 16,429,926 | 9   | 0   | 4   | yes |    |
| at_locus.04100 | 2 | 16,474,237 | 16,474,384 | 5   | 0   | 0   | yes |    |
| at_locus.04101 | 2 | 16,544,567 | 16,545,199 | 273 | 951 | 411 | yes |    |
| at_locus.04102 | 2 | 16,546,676 | 16,547,232 | 269 | 508 | 320 | yes |    |
| at_locus.04103 | 2 | 16,563,137 | 16,563,206 | 6   | 0   | 0   | yes |    |
| at_locus.04104 | 2 | 16,567,833 | 16,567,868 | 5   | 0   | 0   | yes | TE |
| at_locus.04105 | 2 | 16,603,240 | 16,603,564 | 21  | 2   | 1   | yes |    |
| at_locus.04106 | 2 | 16,610,715 | 16,610,839 | 10  | 0   | 0   | yes |    |
| at_locus.04107 | 2 | 16,659,189 | 16,659,211 | 39  | 109 | 82  | no  |    |
| at_locus.04108 | 2 | 16,749,476 | 16,749,524 | 5   | 0   | 0   | yes |    |
| at_locus.04109 | 2 | 16,805,595 | 16,805,951 | 15  | 0   | 1   | yes |    |
| at_locus.04110 | 2 | 16,842,159 | 16,842,356 | 1   | 0   | 5   | yes |    |
| at_locus.04111 | 2 | 16,883,173 | 16,883,345 | 28  | 2   | 2   | no  | TE |
| at_locus.04112 | 2 | 16,883,649 | 16,883,812 | 1   | 0   | 2   | no  | TE |
| at_locus.04113 | 2 | 16,884,070 | 16,884,223 | 25  | 0   | 0   | yes | TE |
| at_locus.04114 | 2 | 16,897,544 | 16,897,750 | 13  | 0   | 0   | no  |    |
| at_locus.04115 | 2 | 16,928,554 | 16,928,629 | 4   | 1   | 0   | yes |    |
| at_locus.04116 | 2 | 16,959,727 | 16,959,779 | 7   | 0   | 0   | yes |    |
| at_locus.04117 | 2 | 17,036,787 | 17,036,969 | 14  | 62  | 33  | yes |    |
| at_locus.04118 | 2 | 17,101,429 | 17,101,741 | 0   | 0   | 5   | no  |    |
| at_locus.04119 | 2 | 17,154,239 | 17,154,605 | 8   | 0   | 1   | no  | TE |
| at_locus.04120 | 2 | 17,231,609 | 17,231,892 | 6   | 10  | 3   | yes |    |
| at_locus.04121 | 2 | 17,260,234 | 17,260,672 | 19  | 1   | 0   | yes | TE |
| at_locus.04122 | 2 | 17,260,912 | 17,261,083 | 13  | 0   | 0   | no  | TE |
| at_locus.04123 | 2 | 17,261,301 | 17,261,464 | 4   | 0   | 0   | no  | TE |
| at_locus.04124 | 2 | 17,262,226 | 17,262,311 | 8   | 0   | 0   | no  | TE |
| at_locus.04125 | 2 | 17,262,901 | 17,263,084 | 39  | 0   | 0   | yes | TE |
| at_locus.04126 | 2 | 17,263,756 | 17,263,842 | 22  | 1   | 0   | yes | TE |
| at_locus.04127 | 2 | 17,296,471 | 17,296,595 | 4   | 0   | 1   | no  |    |
| at_locus.04128 | 2 | 17,307,154 | 17,307,221 | 6   | 0   | 1   | no  | TE |
| at_locus.04129 | 2 | 17,307,434 | 17,307,469 | 4   | 0   | 0   | no  | TE |
| at_locus.04130 | 2 | 17,308,339 | 17,308,374 | 4   | 0   | 0   | yes |    |
| at_locus.04131 | 2 | 17,344,797 | 17,345,106 | 6   | 0   | 0   | yes | TE |
| at_locus.04132 | 2 | 17,346,094 | 17,346,383 | 4   | 0   | 0   | yes | TE |

|                |   |            |            |     |     |     |     |    |
|----------------|---|------------|------------|-----|-----|-----|-----|----|
| at_locus.04133 | 2 | 17,347,788 | 17,348,274 | 2   | 0   | 5   | yes | TE |
| at_locus.04134 | 2 | 17,415,195 | 17,415,518 | 18  | 0   | 17  | yes |    |
| at_locus.04135 | 2 | 17,425,086 | 17,425,437 | 15  | 0   | 1   | yes | TE |
| at_locus.04136 | 2 | 17,642,430 | 17,642,591 | 1   | 0   | 6   | yes |    |
| at_locus.04137 | 2 | 17,795,541 | 17,795,752 | 7   | 0   | 0   | yes |    |
| at_locus.04138 | 2 | 17,854,254 | 17,854,924 | 68  | 2   | 1   | yes |    |
| at_locus.04139 | 2 | 17,855,152 | 17,855,823 | 59  | 1   | 13  | yes |    |
| at_locus.04140 | 2 | 17,999,618 | 18,000,118 | 12  | 0   | 0   | yes | TE |
| at_locus.04141 | 2 | 18,025,596 | 18,025,694 | 1   | 8   | 0   | yes |    |
| at_locus.04142 | 2 | 18,099,059 | 18,099,161 | 10  | 0   | 0   | yes |    |
| at_locus.04143 | 2 | 18,100,235 | 18,100,387 | 20  | 0   | 0   | yes |    |
| at_locus.04144 | 2 | 18,113,824 | 18,114,046 | 11  | 0   | 2   | yes | TE |
| at_locus.04145 | 2 | 18,115,420 | 18,115,459 | 0   | 8   | 1   | yes |    |
| at_locus.04146 | 2 | 18,275,668 | 18,276,132 | 16  | 0   | 16  | yes |    |
| at_locus.04147 | 2 | 18,394,938 | 18,395,022 | 20  | 0   | 0   | yes |    |
| at_locus.04148 | 2 | 18,397,982 | 18,398,088 | 8   | 0   | 1   | yes |    |
| at_locus.04149 | 2 | 18,400,515 | 18,400,600 | 9   | 0   | 1   | yes |    |
| at_locus.04150 | 2 | 18,403,105 | 18,403,167 | 9   | 0   | 0   | yes |    |
| at_locus.04151 | 2 | 18,535,150 | 18,535,304 | 5   | 0   | 2   | yes |    |
| at_locus.04152 | 2 | 18,601,077 | 18,602,231 | 105 | 1   | 118 | yes | TE |
| at_locus.04153 | 2 | 18,626,114 | 18,626,223 | 14  | 24  | 26  | yes |    |
| at_locus.04154 | 2 | 18,666,778 | 18,666,825 | 9   | 1   | 0   | no  |    |
| at_locus.04155 | 2 | 18,667,042 | 18,667,500 | 7   | 0   | 1   | no  |    |
| at_locus.04156 | 2 | 18,709,680 | 18,709,936 | 6   | 0   | 0   | yes |    |
| at_locus.04157 | 2 | 18,710,153 | 18,710,200 | 9   | 1   | 0   | yes |    |
| at_locus.04158 | 2 | 18,810,688 | 18,810,961 | 9   | 0   | 0   | no  |    |
| at_locus.04160 | 2 | 18,964,765 | 18,965,026 | 15  | 0   | 0   | yes |    |
| at_locus.04161 | 2 | 18,979,725 | 18,979,759 | 10  | 0   | 6   | yes |    |
| at_locus.04162 | 2 | 18,980,485 | 18,981,013 | 2   | 7   | 6   | yes |    |
| at_locus.04163 | 2 | 19,001,898 | 19,001,919 | 38  | 544 | 121 | yes |    |
| at_locus.04164 | 2 | 19,078,615 | 19,078,969 | 9   | 0   | 1   | yes |    |
| at_locus.04165 | 2 | 19,170,082 | 19,170,487 | 3   | 0   | 0   | yes | TE |
| at_locus.04166 | 2 | 19,179,285 | 19,179,322 | 11  | 0   | 0   | no  | TE |
| at_locus.04167 | 2 | 19,183,198 | 19,183,332 | 81  | 465 | 199 | yes |    |
| at_locus.04168 | 2 | 19,202,575 | 19,202,968 | 6   | 0   | 0   | no  | TE |
| at_locus.04169 | 2 | 19,203,742 | 19,203,819 | 15  | 0   | 0   | no  | TE |
| at_locus.04170 | 2 | 19,245,548 | 19,245,888 | 0   | 4   | 0   | yes |    |

|                |   |            |            |      |      |      |     |    |
|----------------|---|------------|------------|------|------|------|-----|----|
| at_locus.04171 | 2 | 19,250,094 | 19,250,203 | 4    | 0    | 0    | no  | TE |
| at_locus.04172 | 2 | 19,326,933 | 19,327,024 | 10   | 34   | 39   | yes |    |
| at_locus.04174 | 2 | 19,351,870 | 19,352,139 | 0    | 4    | 0    | yes |    |
| at_locus.04175 | 2 | 19,360,868 | 19,361,148 | 2    | 0    | 4    | yes |    |
| at_locus.04176 | 2 | 19,381,191 | 19,381,414 | 10   | 1    | 0    | yes |    |
| at_locus.04177 | 2 | 19,421,494 | 19,421,656 | 4    | 0    | 0    | yes | TE |
| at_locus.04178 | 2 | 19,422,147 | 19,422,246 | 24   | 70   | 31   | yes |    |
| at_locus.04179 | 2 | 19,527,839 | 19,527,919 | 182  | 486  | 149  | yes |    |
| at_locus.04180 | 2 | 19,630,174 | 19,630,718 | 12   | 0    | 2    | yes | TE |
| at_locus.04181 | 2 | 19,704,811 | 19,705,358 | 1    | 0    | 0    | no  |    |
| at_locus.04182 | 3 | 109        | 159        | 1    | 0    | 0    | no  |    |
| at_locus.04184 | 3 | 158,445    | 158,798    | 14   | 0    | 5    | yes |    |
| at_locus.04185 | 3 | 422,780    | 423,204    | 23   | 0    | 1    | no  | TE |
| at_locus.04186 | 3 | 451,989    | 452,155    | 8    | 0    | 1    | yes |    |
| at_locus.04187 | 3 | 557,656    | 557,742    | 10   | 0    | 0    | no  |    |
| at_locus.04188 | 3 | 558,021    | 558,075    | 39   | 0    | 0    | no  |    |
| at_locus.04189 | 3 | 848,800    | 849,437    | 11   | 0    | 7    | yes |    |
| at_locus.04190 | 3 | 932,718    | 932,973    | 11   | 1    | 14   | yes |    |
| at_locus.04191 | 3 | 1,031,103  | 1,031,140  | 4    | 0    | 0    | yes |    |
| at_locus.04192 | 3 | 1,166,456  | 1,166,747  | 10   | 0    | 0    | yes |    |
| at_locus.04193 | 3 | 1,170,710  | 1,170,967  | 29   | 1    | 10   | yes | TE |
| at_locus.04194 | 3 | 1,210,356  | 1,211,133  | 125  | 5    | 53   | yes |    |
| at_locus.04195 | 3 | 1,261,205  | 1,261,270  | 2    | 0    | 0    | no  |    |
| at_locus.04196 | 3 | 1,283,554  | 1,284,198  | 6    | 0    | 0    | yes | TE |
| at_locus.04197 | 3 | 1,369,978  | 1,370,474  | 10   | 2    | 2    | no  | TE |
| at_locus.04198 | 3 | 1,370,952  | 1,371,404  | 3    | 0    | 0    | no  | TE |
| at_locus.04199 | 3 | 1,571,580  | 1,571,623  | 4    | 0    | 0    | no  | TE |
| at_locus.04200 | 3 | 1,601,979  | 1,602,290  | 8    | 0    | 2    | yes | TE |
| at_locus.04201 | 3 | 1,602,695  | 1,603,016  | 10   | 0    | 18   | yes |    |
| at_locus.04202 | 3 | 1,607,064  | 1,607,510  | 7    | 0    | 1    | no  | TE |
| at_locus.04203 | 3 | 1,657,766  | 1,657,993  | 4    | 8    | 4    | no  |    |
| at_locus.04204 | 3 | 1,674,868  | 1,675,344  | 6    | 0    | 2    | yes |    |
| at_locus.04205 | 3 | 1,681,815  | 1,681,977  | 3    | 8    | 4    | no  |    |
| at_locus.04206 | 3 | 1,924,075  | 1,924,278  | 9    | 0    | 1    | no  |    |
| at_locus.04207 | 3 | 1,928,372  | 1,928,604  | 24   | 0    | 0    | yes |    |
| at_locus.04208 | 3 | 1,962,827  | 1,963,341  | 1    | 0    | 2    | no  |    |
| at_locus.04209 | 3 | 1,963,651  | 1,966,975  | 1117 | 1711 | 1480 | yes | TE |



|                |   |           |           |      |      |      |     |    |
|----------------|---|-----------|-----------|------|------|------|-----|----|
| at_locus.04210 | 3 | 1,967,206 | 1,970,628 | 1080 | 1619 | 1454 | yes | TE |
| at_locus.04211 | 3 | 1,971,539 | 1,972,078 | 2    | 0    | 2    | no  | TE |
| at_locus.04212 | 3 | 2,091,128 | 2,091,474 | 7    | 1    | 0    | yes |    |
| at_locus.04213 | 3 | 2,091,724 | 2,091,786 | 4    | 0    | 0    | yes |    |
| at_locus.04214 | 3 | 2,251,386 | 2,251,582 | 11   | 0    | 0    | yes |    |
| at_locus.04215 | 3 | 2,259,164 | 2,260,960 | 91   | 0    | 31   | yes | TE |
| at_locus.04216 | 3 | 2,361,141 | 2,361,450 | 5    | 0    | 1    | no  |    |
| at_locus.04217 | 3 | 2,508,905 | 2,508,935 | 5    | 0    | 1    | yes |    |
| at_locus.04218 | 3 | 2,628,990 | 2,629,326 | 8    | 2    | 1    | no  | TE |
| at_locus.04219 | 3 | 2,629,948 | 2,630,045 | 8    | 0    | 0    | no  | TE |
| at_locus.04220 | 3 | 2,772,636 | 2,772,787 | 4    | 2    | 0    | yes | TE |
| at_locus.04221 | 3 | 2,808,755 | 2,809,049 | 7    | 0    | 5    | no  | TE |
| at_locus.04222 | 3 | 2,811,866 | 2,812,056 | 0    | 0    | 4    | no  | TE |
| at_locus.04223 | 3 | 2,888,303 | 2,888,423 | 7    | 0    | 5    | yes |    |
| at_locus.04225 | 3 | 2,921,977 | 2,922,579 | 15   | 0    | 3    | no  | TE |
| at_locus.04226 | 3 | 2,922,856 | 2,923,257 | 15   | 0    | 1    | no  | TE |
| at_locus.04227 | 3 | 2,988,710 | 2,988,868 | 8    | 0    | 4    | yes |    |
| at_locus.04228 | 3 | 3,204,818 | 3,204,921 | 4    | 0    | 0    | yes |    |
| at_locus.04229 | 3 | 3,366,353 | 3,366,422 | 47   | 210  | 113  | yes |    |
| at_locus.04230 | 3 | 3,367,983 | 3,368,023 | 7    | 0    | 0    | yes |    |
| at_locus.04231 | 3 | 3,423,569 | 3,423,790 | 10   | 0    | 0    | yes |    |
| at_locus.04232 | 3 | 3,599,797 | 3,599,901 | 28   | 49   | 138  | yes |    |
| at_locus.04233 | 3 | 3,686,607 | 3,686,659 | 4    | 0    | 0    | yes |    |
| at_locus.04234 | 3 | 3,687,061 | 3,687,098 | 2    | 0    | 5    | yes |    |
| at_locus.04235 | 3 | 3,716,348 | 3,716,390 | 9    | 0    | 0    | no  | TE |
| at_locus.04236 | 3 | 3,743,408 | 3,743,869 | 24   | 0    | 26   | yes |    |
| at_locus.04237 | 3 | 3,807,088 | 3,807,236 | 4    | 0    | 0    | yes |    |
| at_locus.04238 | 3 | 3,873,850 | 3,873,900 | 10   | 0    | 0    | no  | TE |
| at_locus.04239 | 3 | 3,965,198 | 3,965,556 | 14   | 0    | 1    | yes | TE |
| at_locus.04240 | 3 | 3,965,898 | 3,965,932 | 7    | 0    | 1    | no  | TE |
| at_locus.04241 | 3 | 3,987,739 | 3,988,016 | 5    | 0    | 0    | no  | TE |
| at_locus.04242 | 3 | 3,988,365 | 3,988,408 | 10   | 0    | 0    | no  | TE |
| at_locus.04243 | 3 | 4,263,204 | 4,263,239 | 4    | 0    | 0    | no  |    |
| at_locus.04244 | 3 | 4,359,017 | 4,359,211 | 2216 | 3299 | 1378 | yes |    |
| at_locus.04246 | 3 | 4,467,620 | 4,467,678 | 5    | 0    | 0    | no  | TE |
| at_locus.04247 | 3 | 4,494,194 | 4,494,376 | 5    | 1    | 0    | yes |    |
| at_locus.04248 | 3 | 4,496,832 | 4,496,921 | 17   | 34   | 12   | yes |    |

|                |   |           |           |     |     |     |     |    |
|----------------|---|-----------|-----------|-----|-----|-----|-----|----|
| at_locus.04249 | 3 | 4,551,570 | 4,551,857 | 14  | 0   | 1   | yes | TE |
| at_locus.04251 | 3 | 4,579,244 | 4,579,711 | 24  | 1   | 1   | no  | TE |
| at_locus.04252 | 3 | 4,635,237 | 4,635,430 | 8   | 1   | 0   | yes |    |
| at_locus.04253 | 3 | 4,727,069 | 4,727,138 | 10  | 0   | 0   | no  |    |
| at_locus.04254 | 3 | 4,727,878 | 4,727,946 | 6   | 0   | 0   | yes |    |
| at_locus.04255 | 3 | 4,728,709 | 4,728,778 | 10  | 0   | 0   | no  |    |
| at_locus.04256 | 3 | 4,729,512 | 4,729,581 | 10  | 0   | 0   | no  |    |
| at_locus.04257 | 3 | 4,745,635 | 4,745,812 | 5   | 1   | 0   | yes |    |
| at_locus.04258 | 3 | 4,752,953 | 4,753,093 | 10  | 0   | 1   | yes | TE |
| at_locus.04259 | 3 | 4,796,172 | 4,796,452 | 4   | 1   | 0   | yes | TE |
| at_locus.04260 | 3 | 4,805,805 | 4,805,827 | 14  | 18  | 25  | no  |    |
| at_locus.04261 | 3 | 4,929,744 | 4,930,123 | 0   | 0   | 8   | yes | TE |
| at_locus.04262 | 3 | 4,931,942 | 4,932,166 | 4   | 0   | 0   | yes | TE |
| at_locus.04264 | 3 | 4,977,276 | 4,977,304 | 4   | 0   | 0   | no  | TE |
| at_locus.04265 | 3 | 4,977,984 | 4,978,025 | 5   | 0   | 0   | yes | TE |
| at_locus.04267 | 3 | 5,278,449 | 5,278,634 | 4   | 0   | 0   | no  | TE |
| at_locus.04268 | 3 | 5,283,541 | 5,283,765 | 1   | 0   | 4   | no  | TE |
| at_locus.04269 | 3 | 5,359,311 | 5,359,327 | 4   | 0   | 0   | no  |    |
| at_locus.04270 | 3 | 5,380,148 | 5,380,228 | 12  | 1   | 0   | no  | TE |
| at_locus.04271 | 3 | 5,387,133 | 5,387,258 | 1   | 3   | 7   | yes |    |
| at_locus.04272 | 3 | 5,404,932 | 5,405,212 | 13  | 0   | 0   | yes |    |
| at_locus.04273 | 3 | 5,405,644 | 5,406,018 | 10  | 1   | 0   | yes |    |
| at_locus.04274 | 3 | 5,406,309 | 5,406,347 | 7   | 0   | 0   | yes |    |
| at_locus.04275 | 3 | 5,453,088 | 5,453,762 | 30  | 1   | 17  | yes |    |
| at_locus.04276 | 3 | 5,622,739 | 5,623,031 | 10  | 2   | 1   | no  | TE |
| at_locus.04277 | 3 | 5,623,638 | 5,623,833 | 12  | 0   | 1   | no  | TE |
| at_locus.04278 | 3 | 5,651,214 | 5,651,402 | 7   | 0   | 0   | yes | TE |
| at_locus.04279 | 3 | 5,652,322 | 5,652,360 | 6   | 0   | 1   | no  | TE |
| at_locus.04280 | 3 | 5,729,617 | 5,730,067 | 10  | 0   | 0   | yes |    |
| at_locus.04281 | 3 | 5,743,970 | 5,744,721 | 45  | 1   | 1   | yes | TE |
| at_locus.04282 | 3 | 5,744,987 | 5,745,237 | 7   | 2   | 0   | no  | TE |
| at_locus.04283 | 3 | 5,778,861 | 5,778,974 | 9   | 0   | 0   | yes |    |
| at_locus.04284 | 3 | 5,779,230 | 5,780,706 | 210 | 6   | 130 | yes |    |
| at_locus.04285 | 3 | 5,780,894 | 5,781,275 | 11  | 0   | 0   | yes |    |
| at_locus.04286 | 3 | 5,792,570 | 5,792,593 | 4   | 0   | 0   | no  | TE |
| at_locus.04287 | 3 | 5,839,829 | 5,840,154 | 59  | 5   | 1   | no  |    |
| at_locus.04288 | 3 | 5,862,085 | 5,862,375 | 323 | 874 | 87  | yes |    |

|                |   |           |           |     |     |     |     |    |
|----------------|---|-----------|-----------|-----|-----|-----|-----|----|
| at_locus.04289 | 3 | 5,866,223 | 5,866,433 | 6   | 0   | 0   | no  | TE |
| at_locus.04290 | 3 | 5,867,594 | 5,868,309 | 7   | 0   | 7   | yes |    |
| at_locus.04291 | 3 | 5,929,472 | 5,930,826 | 60  | 0   | 21  | yes | TE |
| at_locus.04292 | 3 | 6,052,730 | 6,052,790 | 4   | 0   | 0   | no  | TE |
| at_locus.04293 | 3 | 6,073,441 | 6,073,689 | 7   | 0   | 2   | yes | TE |
| at_locus.04294 | 3 | 6,244,678 | 6,244,699 | 230 | 589 | 17  | yes |    |
| at_locus.04295 | 3 | 6,295,384 | 6,295,918 | 17  | 0   | 3   | yes |    |
| at_locus.04296 | 3 | 6,344,736 | 6,344,898 | 5   | 0   | 0   | no  | TE |
| at_locus.04297 | 3 | 6,350,306 | 6,350,326 | 0   | 0   | 7   | yes |    |
| at_locus.04298 | 3 | 6,366,902 | 6,367,101 | 7   | 0   | 6   | yes |    |
| at_locus.04299 | 3 | 6,431,730 | 6,432,023 | 48  | 1   | 19  | yes |    |
| at_locus.04300 | 3 | 6,486,332 | 6,487,251 | 25  | 2   | 2   | no  | TE |
| at_locus.04301 | 3 | 6,576,361 | 6,576,482 | 4   | 0   | 1   | no  |    |
| at_locus.04302 | 3 | 6,668,470 | 6,668,568 | 11  | 0   | 0   | yes |    |
| at_locus.04303 | 3 | 6,705,940 | 6,705,971 | 7   | 0   | 0   | yes |    |
| at_locus.04304 | 3 | 6,728,933 | 6,729,503 | 47  | 0   | 0   | yes | TE |
| at_locus.04305 | 3 | 6,990,979 | 6,991,150 | 4   | 0   | 1   | yes |    |
| at_locus.04306 | 3 | 6,991,751 | 6,991,779 | 11  | 0   | 0   | no  | TE |
| at_locus.04307 | 3 | 7,032,928 | 7,032,944 | 5   | 6   | 12  | no  |    |
| at_locus.04308 | 3 | 7,040,957 | 7,041,167 | 10  | 0   | 0   | yes | TE |
| at_locus.04309 | 3 | 7,093,912 | 7,094,129 | 6   | 0   | 0   | yes |    |
| at_locus.04310 | 3 | 7,232,038 | 7,232,104 | 4   | 1   | 0   | yes |    |
| at_locus.04311 | 3 | 7,235,015 | 7,235,065 | 4   | 0   | 1   | no  |    |
| at_locus.04312 | 3 | 7,235,269 | 7,235,380 | 7   | 0   | 2   | yes |    |
| at_locus.04313 | 3 | 7,274,685 | 7,274,747 | 19  | 2   | 0   | yes | TE |
| at_locus.04314 | 3 | 7,279,116 | 7,279,440 | 23  | 0   | 1   | yes |    |
| at_locus.04315 | 3 | 7,279,704 | 7,279,797 | 8   | 0   | 2   | no  |    |
| at_locus.04316 | 3 | 7,280,016 | 7,280,122 | 6   | 0   | 0   | no  | TE |
| at_locus.04317 | 3 | 7,291,836 | 7,291,932 | 6   | 0   | 0   | yes | TE |
| at_locus.04318 | 3 | 7,318,508 | 7,319,295 | 23  | 0   | 2   | yes | TE |
| at_locus.04319 | 3 | 7,342,788 | 7,343,205 | 67  | 0   | 1   | no  |    |
| at_locus.04320 | 3 | 7,420,506 | 7,421,516 | 140 | 3   | 153 | yes |    |
| at_locus.04321 | 3 | 7,421,720 | 7,421,944 | 5   | 0   | 1   | yes |    |
| at_locus.04322 | 3 | 7,560,294 | 7,560,373 | 5   | 0   | 0   | yes | TE |
| at_locus.04323 | 3 | 7,634,706 | 7,634,850 | 4   | 0   | 0   | yes | TE |
| at_locus.04324 | 3 | 7,659,364 | 7,659,526 | 6   | 0   | 0   | no  | TE |
| at_locus.04326 | 3 | 7,703,858 | 7,703,910 | 5   | 0   | 0   | yes |    |

|                |   |           |           |    |     |     |     |    |
|----------------|---|-----------|-----------|----|-----|-----|-----|----|
| at_locus.04327 | 3 | 7,711,102 | 7,711,125 | 14 | 0   | 0   | yes |    |
| at_locus.04328 | 3 | 7,713,852 | 7,713,899 | 22 | 0   | 1   | no  |    |
| at_locus.04329 | 3 | 7,714,214 | 7,714,336 | 15 | 0   | 0   | yes | TE |
| at_locus.04330 | 3 | 7,764,823 | 7,765,085 | 5  | 0   | 7   | yes |    |
| at_locus.04331 | 3 | 7,765,365 | 7,766,157 | 16 | 0   | 9   | yes | TE |
| at_locus.04332 | 3 | 7,766,422 | 7,766,827 | 28 | 0   | 1   | no  | TE |
| at_locus.04333 | 3 | 7,782,314 | 7,782,404 | 4  | 0   | 0   | no  |    |
| at_locus.04334 | 3 | 7,805,280 | 7,805,677 | 4  | 0   | 1   | no  |    |
| at_locus.04335 | 3 | 7,805,894 | 7,806,427 | 5  | 0   | 1   | no  |    |
| at_locus.04336 | 3 | 7,845,298 | 7,845,378 | 8  | 0   | 0   | yes | TE |
| at_locus.04337 | 3 | 7,851,693 | 7,851,788 | 30 | 1   | 1   | no  | TE |
| at_locus.04338 | 3 | 7,856,684 | 7,857,034 | 5  | 0   | 0   | yes |    |
| at_locus.04339 | 3 | 7,860,784 | 7,860,879 | 30 | 1   | 1   | no  | TE |
| at_locus.04340 | 3 | 7,880,875 | 7,880,953 | 4  | 0   | 0   | yes |    |
| at_locus.04341 | 3 | 7,898,465 | 7,898,675 | 4  | 0   | 0   | yes | TE |
| at_locus.04342 | 3 | 7,921,710 | 7,922,452 | 14 | 1   | 1   | yes | TE |
| at_locus.04343 | 3 | 7,924,328 | 7,924,470 | 6  | 0   | 0   | yes | TE |
| at_locus.04344 | 3 | 7,937,314 | 7,937,545 | 20 | 0   | 2   | yes | TE |
| at_locus.04345 | 3 | 7,938,345 | 7,938,575 | 4  | 0   | 0   | yes | TE |
| at_locus.04346 | 3 | 7,945,289 | 7,945,550 | 6  | 0   | 0   | yes |    |
| at_locus.04347 | 3 | 7,980,093 | 7,980,633 | 21 | 0   | 0   | no  | TE |
| at_locus.04348 | 3 | 7,995,058 | 7,995,201 | 7  | 0   | 0   | no  | TE |
| at_locus.04349 | 3 | 7,995,410 | 7,995,973 | 29 | 1   | 1   | no  | TE |
| at_locus.04350 | 3 | 7,996,558 | 7,996,643 | 11 | 0   | 0   | no  | TE |
| at_locus.04351 | 3 | 8,003,417 | 8,003,620 | 32 | 2   | 1   | no  |    |
| at_locus.04352 | 3 | 8,093,561 | 8,093,916 | 7  | 0   | 3   | no  | TE |
| at_locus.04353 | 3 | 8,095,025 | 8,095,414 | 4  | 1   | 4   | no  | TE |
| at_locus.04354 | 3 | 8,095,768 | 8,095,909 | 4  | 0   | 0   | no  | TE |
| at_locus.04355 | 3 | 8,101,167 | 8,101,666 | 20 | 0   | 8   | no  | TE |
| at_locus.04356 | 3 | 8,108,093 | 8,108,199 | 89 | 286 | 141 | yes |    |
| at_locus.04357 | 3 | 8,130,519 | 8,130,543 | 1  | 0   | 5   | yes |    |
| at_locus.04358 | 3 | 8,138,735 | 8,138,782 | 6  | 0   | 2   | yes |    |
| at_locus.04359 | 3 | 8,209,633 | 8,210,122 | 19 | 0   | 0   | yes | TE |
| at_locus.04360 | 3 | 8,219,729 | 8,220,034 | 6  | 0   | 3   | yes |    |
| at_locus.04361 | 3 | 8,231,287 | 8,231,347 | 10 | 0   | 0   | yes | TE |
| at_locus.04362 | 3 | 8,231,849 | 8,231,964 | 0  | 0   | 4   | yes | TE |
| at_locus.04363 | 3 | 8,232,337 | 8,232,397 | 7  | 0   | 1   | no  | TE |

|                |   |           |           |     |    |     |     |    |
|----------------|---|-----------|-----------|-----|----|-----|-----|----|
| at_locus.04364 | 3 | 8,232,932 | 8,233,373 | 9   | 0  | 6   | yes |    |
| at_locus.04365 | 3 | 8,236,168 | 8,236,255 | 36  | 76 | 62  | yes |    |
| at_locus.04366 | 3 | 8,247,894 | 8,248,347 | 15  | 2  | 0   | yes |    |
| at_locus.04367 | 3 | 8,272,037 | 8,272,283 | 5   | 0  | 9   | yes |    |
| at_locus.04368 | 3 | 8,329,308 | 8,329,413 | 16  | 0  | 0   | no  | TE |
| at_locus.04369 | 3 | 8,332,142 | 8,332,452 | 9   | 0  | 4   | yes | TE |
| at_locus.04370 | 3 | 8,362,650 | 8,362,769 | 4   | 0  | 0   | yes |    |
| at_locus.04371 | 3 | 8,371,118 | 8,371,337 | 5   | 0  | 2   | yes |    |
| at_locus.04372 | 3 | 8,371,815 | 8,372,045 | 9   | 0  | 2   | yes |    |
| at_locus.04373 | 3 | 8,411,519 | 8,411,905 | 2   | 6  | 0   | yes |    |
| at_locus.04374 | 3 | 8,492,097 | 8,492,280 | 9   | 0  | 0   | no  | TE |
| at_locus.04375 | 3 | 8,493,157 | 8,493,405 | 20  | 0  | 2   | yes | TE |
| at_locus.04376 | 3 | 8,509,686 | 8,510,173 | 97  | 4  | 10  | yes |    |
| at_locus.04377 | 3 | 8,510,322 | 8,512,030 | 271 | 6  | 205 | yes |    |
| at_locus.04378 | 3 | 8,529,909 | 8,530,582 | 2   | 9  | 1   | yes |    |
| at_locus.04379 | 3 | 8,574,656 | 8,574,686 | 9   | 0  | 0   | yes |    |
| at_locus.04380 | 3 | 8,596,107 | 8,596,254 | 9   | 0  | 0   | no  | TE |
| at_locus.04381 | 3 | 8,596,886 | 8,596,972 | 5   | 0  | 0   | no  | TE |
| at_locus.04382 | 3 | 8,615,062 | 8,615,345 | 5   | 0  | 4   | yes |    |
| at_locus.04383 | 3 | 8,623,691 | 8,623,891 | 5   | 0  | 0   | yes |    |
| at_locus.04384 | 3 | 8,644,495 | 8,645,604 | 13  | 0  | 0   | yes | TE |
| at_locus.04385 | 3 | 8,659,824 | 8,660,057 | 7   | 1  | 0   | yes | TE |
| at_locus.04386 | 3 | 8,684,457 | 8,684,591 | 4   | 0  | 0   | yes |    |
| at_locus.04387 | 3 | 8,690,326 | 8,690,568 | 7   | 0  | 0   | yes |    |
| at_locus.04388 | 3 | 8,752,191 | 8,752,363 | 28  | 1  | 1   | yes | TE |
| at_locus.04389 | 3 | 8,752,838 | 8,752,916 | 9   | 0  | 0   | no  | TE |
| at_locus.04390 | 3 | 8,757,621 | 8,757,832 | 10  | 0  | 0   | yes | TE |
| at_locus.04391 | 3 | 8,772,180 | 8,772,384 | 12  | 0  | 0   | yes | TE |
| at_locus.04392 | 3 | 8,796,410 | 8,796,932 | 6   | 0  | 10  | yes |    |
| at_locus.04393 | 3 | 8,842,998 | 8,843,369 | 26  | 1  | 1   | no  | TE |
| at_locus.04394 | 3 | 8,843,513 | 8,843,968 | 2   | 0  | 14  | no  | TE |
| at_locus.04395 | 3 | 8,844,154 | 8,844,486 | 4   | 0  | 4   | no  | TE |
| at_locus.04396 | 3 | 8,844,885 | 8,846,132 | 9   | 0  | 22  | no  | TE |
| at_locus.04397 | 3 | 8,846,517 | 8,846,873 | 5   | 0  | 6   | no  | TE |
| at_locus.04398 | 3 | 8,847,038 | 8,847,394 | 6   | 0  | 2   | no  | TE |
| at_locus.04399 | 3 | 8,847,652 | 8,847,821 | 4   | 0  | 8   | no  | TE |
| at_locus.04400 | 3 | 8,848,029 | 8,848,568 | 6   | 0  | 11  | yes | TE |

|                |   |           |           |    |   |    |     |    |
|----------------|---|-----------|-----------|----|---|----|-----|----|
| at_locus.04401 | 3 | 8,849,792 | 8,850,135 | 0  | 0 | 5  | no  | TE |
| at_locus.04402 | 3 | 8,851,128 | 8,851,646 | 5  | 1 | 6  | no  | TE |
| at_locus.04403 | 3 | 8,852,676 | 8,853,251 | 5  | 0 | 8  | no  | TE |
| at_locus.04404 | 3 | 8,853,640 | 8,854,187 | 8  | 0 | 7  | no  | TE |
| at_locus.04405 | 3 | 8,855,869 | 8,855,989 | 1  | 0 | 4  | no  | TE |
| at_locus.04406 | 3 | 8,856,368 | 8,857,049 | 10 | 0 | 5  | no  | TE |
| at_locus.04407 | 3 | 8,857,097 | 8,858,061 | 17 | 1 | 26 | no  | TE |
| at_locus.04408 | 3 | 8,874,929 | 8,875,652 | 19 | 0 | 2  | yes | TE |
| at_locus.04409 | 3 | 8,883,323 | 8,884,042 | 19 | 1 | 1  | yes | TE |
| at_locus.04410 | 3 | 8,895,041 | 8,895,068 | 4  | 0 | 1  | yes |    |
| at_locus.04411 | 3 | 8,931,139 | 8,931,165 | 6  | 0 | 0  | yes |    |
| at_locus.04412 | 3 | 8,944,919 | 8,945,032 | 8  | 0 | 0  | yes | TE |
| at_locus.04413 | 3 | 8,956,294 | 8,956,320 | 9  | 0 | 0  | yes |    |
| at_locus.04414 | 3 | 8,957,172 | 8,957,464 | 8  | 0 | 1  | yes |    |
| at_locus.04415 | 3 | 8,977,274 | 8,977,506 | 16 | 0 | 0  | yes |    |
| at_locus.04417 | 3 | 8,985,832 | 8,985,896 | 11 | 0 | 0  | yes | TE |
| at_locus.04418 | 3 | 9,135,045 | 9,135,393 | 21 | 0 | 12 | yes |    |
| at_locus.04419 | 3 | 9,142,384 | 9,143,261 | 17 | 0 | 22 | yes |    |
| at_locus.04420 | 3 | 9,188,511 | 9,188,750 | 6  | 0 | 8  | yes |    |
| at_locus.04421 | 3 | 9,198,878 | 9,198,948 | 7  | 0 | 0  | yes |    |
| at_locus.04422 | 3 | 9,257,464 | 9,257,487 | 4  | 2 | 0  | yes |    |
| at_locus.04423 | 3 | 9,323,277 | 9,323,365 | 10 | 0 | 2  | no  | TE |
| at_locus.04424 | 3 | 9,323,851 | 9,323,987 | 12 | 0 | 0  | no  | TE |
| at_locus.04425 | 3 | 9,328,959 | 9,329,062 | 5  | 1 | 3  | yes | TE |
| at_locus.04426 | 3 | 9,332,937 | 9,333,223 | 4  | 0 | 3  | yes | TE |
| at_locus.04427 | 3 | 9,336,587 | 9,336,638 | 12 | 0 | 0  | yes | TE |
| at_locus.04428 | 3 | 9,363,046 | 9,363,074 | 7  | 0 | 0  | no  | TE |
| at_locus.04429 | 3 | 9,385,133 | 9,386,891 | 33 | 2 | 1  | yes | TE |
| at_locus.04430 | 3 | 9,407,313 | 9,407,366 | 8  | 0 | 0  | yes | TE |
| at_locus.04431 | 3 | 9,430,383 | 9,430,752 | 15 | 0 | 3  | yes |    |
| at_locus.04432 | 3 | 9,437,775 | 9,437,790 | 0  | 0 | 4  | no  | TE |
| at_locus.04433 | 3 | 9,446,038 | 9,446,053 | 0  | 0 | 4  | no  | TE |
| at_locus.04434 | 3 | 9,472,516 | 9,472,841 | 59 | 5 | 1  | no  |    |
| at_locus.04435 | 3 | 9,541,684 | 9,542,479 | 14 | 0 | 2  | yes | TE |
| at_locus.04436 | 3 | 9,559,920 | 9,560,212 | 10 | 2 | 1  | no  | TE |
| at_locus.04437 | 3 | 9,560,689 | 9,560,918 | 9  | 0 | 0  | no  | TE |
| at_locus.04438 | 3 | 9,577,364 | 9,577,634 | 5  | 0 | 0  | yes | TE |

|                |   |           |           |     |    |     |     |    |
|----------------|---|-----------|-----------|-----|----|-----|-----|----|
| at_locus.04439 | 3 | 9,596,734 | 9,597,015 | 21  | 0  | 0   | yes |    |
| at_locus.04440 | 3 | 9,609,391 | 9,610,098 | 16  | 0  | 4   | yes | TE |
| at_locus.04441 | 3 | 9,610,456 | 9,611,690 | 22  | 1  | 8   | no  | TE |
| at_locus.04442 | 3 | 9,650,761 | 9,650,955 | 9   | 1  | 0   | yes |    |
| at_locus.04443 | 3 | 9,683,227 | 9,683,390 | 6   | 0  | 1   | yes |    |
| at_locus.04444 | 3 | 9,693,535 | 9,693,755 | 4   | 0  | 2   | yes | TE |
| at_locus.04445 | 3 | 9,704,153 | 9,704,308 | 9   | 0  | 1   | yes | TE |
| at_locus.04446 | 3 | 9,708,111 | 9,708,921 | 271 | 14 | 106 | yes |    |
| at_locus.04447 | 3 | 9,708,953 | 9,710,242 | 204 | 6  | 197 | yes | TE |
| at_locus.04448 | 3 | 9,725,119 | 9,725,426 | 13  | 0  | 1   | no  | TE |
| at_locus.04449 | 3 | 9,725,691 | 9,725,995 | 4   | 0  | 4   | no  | TE |
| at_locus.04450 | 3 | 9,727,439 | 9,728,175 | 8   | 0  | 10  | no  | TE |
| at_locus.04451 | 3 | 9,729,666 | 9,730,304 | 1   | 0  | 8   | no  | TE |
| at_locus.04452 | 3 | 9,730,697 | 9,731,107 | 1   | 1  | 5   | no  | TE |
| at_locus.04453 | 3 | 9,731,898 | 9,732,514 | 7   | 0  | 5   | no  | TE |
| at_locus.04454 | 3 | 9,733,039 | 9,733,799 | 18  | 0  | 5   | no  | TE |
| at_locus.04455 | 3 | 9,734,551 | 9,734,845 | 1   | 0  | 5   | no  | TE |
| at_locus.04456 | 3 | 9,735,369 | 9,735,697 | 4   | 0  | 0   | no  | TE |
| at_locus.04457 | 3 | 9,735,965 | 9,736,280 | 5   | 0  | 0   | no  | TE |
| at_locus.04458 | 3 | 9,736,545 | 9,736,728 | 5   | 0  | 2   | no  | TE |
| at_locus.04459 | 3 | 9,755,641 | 9,755,921 | 12  | 0  | 0   | yes |    |
| at_locus.04460 | 3 | 9,767,596 | 9,768,027 | 36  | 2  | 0   | no  | TE |
| at_locus.04461 | 3 | 9,768,273 | 9,768,398 | 12  | 0  | 0   | yes | TE |
| at_locus.04462 | 3 | 9,768,618 | 9,769,288 | 10  | 0  | 3   | yes | TE |
| at_locus.04463 | 3 | 9,770,382 | 9,770,448 | 5   | 0  | 0   | yes |    |
| at_locus.04464 | 3 | 9,774,252 | 9,774,609 | 6   | 1  | 10  | yes | TE |
| at_locus.04465 | 3 | 9,782,699 | 9,782,846 | 5   | 0  | 0   | yes | TE |
| at_locus.04466 | 3 | 9,787,115 | 9,787,410 | 1   | 0  | 5   | yes | TE |
| at_locus.04467 | 3 | 9,787,720 | 9,788,068 | 0   | 0  | 5   | yes | TE |
| at_locus.04468 | 3 | 9,809,499 | 9,810,379 | 20  | 1  | 4   | yes | TE |
| at_locus.04469 | 3 | 9,829,992 | 9,830,136 | 15  | 0  | 0   | no  | TE |
| at_locus.04470 | 3 | 9,830,460 | 9,830,564 | 7   | 0  | 0   | no  | TE |
| at_locus.04472 | 3 | 9,849,529 | 9,849,595 | 6   | 0  | 0   | yes |    |
| at_locus.04473 | 3 | 9,864,573 | 9,864,781 | 0   | 0  | 7   | yes |    |
| at_locus.04474 | 3 | 9,871,508 | 9,871,759 | 3   | 10 | 6   | yes |    |
| at_locus.04475 | 3 | 9,873,235 | 9,873,365 | 27  | 57 | 22  | no  |    |
| at_locus.04476 | 3 | 9,873,593 | 9,873,740 | 26  | 56 | 20  | no  |    |

|                |   |            |            |    |    |    |     |    |
|----------------|---|------------|------------|----|----|----|-----|----|
| at_locus.04477 | 3 | 9,875,780  | 9,875,829  | 6  | 0  | 0  | yes |    |
| at_locus.04478 | 3 | 9,876,804  | 9,876,934  | 27 | 55 | 16 | no  |    |
| at_locus.04479 | 3 | 9,877,148  | 9,877,297  | 26 | 59 | 21 | no  |    |
| at_locus.04480 | 3 | 9,879,445  | 9,879,577  | 28 | 56 | 16 | yes |    |
| at_locus.04481 | 3 | 9,879,798  | 9,879,947  | 26 | 59 | 21 | no  |    |
| at_locus.04482 | 3 | 9,891,333  | 9,891,718  | 9  | 0  | 0  | yes | TE |
| at_locus.04483 | 3 | 9,904,589  | 9,904,852  | 7  | 0  | 0  | yes |    |
| at_locus.04484 | 3 | 9,966,780  | 9,967,199  | 29 | 0  | 25 | yes |    |
| at_locus.04485 | 3 | 9,978,069  | 9,978,093  | 4  | 0  | 0  | yes |    |
| at_locus.04486 | 3 | 9,978,300  | 9,978,703  | 11 | 2  | 0  | yes |    |
| at_locus.04487 | 3 | 9,983,288  | 9,983,311  | 4  | 0  | 0  | yes |    |
| at_locus.04488 | 3 | 9,989,285  | 9,989,651  | 7  | 0  | 0  | yes |    |
| at_locus.04489 | 3 | 9,990,087  | 9,990,290  | 7  | 0  | 5  | yes |    |
| at_locus.04490 | 3 | 9,998,001  | 9,998,077  | 7  | 1  | 2  | yes |    |
| at_locus.04491 | 3 | 10,006,405 | 10,006,502 | 4  | 0  | 0  | no  |    |
| at_locus.04492 | 3 | 10,009,656 | 10,009,952 | 26 | 0  | 1  | yes | TE |
| at_locus.04493 | 3 | 10,014,690 | 10,014,930 | 9  | 0  | 1  | yes |    |
| at_locus.04494 | 3 | 10,032,439 | 10,032,573 | 17 | 0  | 0  | yes | TE |
| at_locus.04495 | 3 | 10,033,229 | 10,033,325 | 15 | 0  | 1  | yes | TE |
| at_locus.04496 | 3 | 10,050,383 | 10,050,521 | 18 | 0  | 1  | yes | TE |
| at_locus.04497 | 3 | 10,083,549 | 10,084,063 | 18 | 0  | 1  | yes | TE |
| at_locus.04498 | 3 | 10,107,408 | 10,107,710 | 4  | 0  | 1  | no  | TE |
| at_locus.04499 | 3 | 10,112,115 | 10,112,576 | 7  | 0  | 2  | yes | TE |
| at_locus.04500 | 3 | 10,115,495 | 10,115,705 | 5  | 0  | 1  | no  |    |
| at_locus.04501 | 3 | 10,117,213 | 10,117,423 | 5  | 0  | 1  | no  |    |
| at_locus.04502 | 3 | 10,140,660 | 10,140,797 | 5  | 0  | 0  | yes |    |
| at_locus.04503 | 3 | 10,141,981 | 10,142,019 | 4  | 0  | 0  | yes | TE |
| at_locus.04504 | 3 | 10,168,192 | 10,168,606 | 1  | 0  | 4  | no  | TE |
| at_locus.04505 | 3 | 10,168,692 | 10,168,895 | 7  | 0  | 0  | no  | TE |
| at_locus.04506 | 3 | 10,169,214 | 10,170,233 | 17 | 0  | 4  | yes | TE |
| at_locus.04507 | 3 | 10,177,947 | 10,178,108 | 6  | 0  | 0  | yes | TE |
| at_locus.04508 | 3 | 10,178,442 | 10,178,802 | 26 | 1  | 6  | yes | TE |
| at_locus.04509 | 3 | 10,191,944 | 10,192,269 | 10 | 0  | 1  | yes | TE |
| at_locus.04510 | 3 | 10,203,797 | 10,203,819 | 4  | 0  | 0  | no  | TE |
| at_locus.04511 | 3 | 10,263,875 | 10,264,009 | 6  | 0  | 0  | yes | TE |
| at_locus.04512 | 3 | 10,264,240 | 10,264,268 | 4  | 0  | 1  | yes | TE |
| at_locus.04513 | 3 | 10,264,484 | 10,264,521 | 1  | 0  | 4  | yes | TE |



|                |   |            |            |    |    |    |     |    |
|----------------|---|------------|------------|----|----|----|-----|----|
| at_locus.04514 | 3 | 10,285,399 | 10,285,676 | 9  | 0  | 0  | yes | TE |
| at_locus.04515 | 3 | 10,294,575 | 10,294,863 | 2  | 0  | 4  | no  | TE |
| at_locus.04516 | 3 | 10,295,031 | 10,295,553 | 9  | 0  | 1  | no  | TE |
| at_locus.04517 | 3 | 10,295,874 | 10,296,302 | 7  | 0  | 8  | no  | TE |
| at_locus.04518 | 3 | 10,320,153 | 10,320,172 | 0  | 0  | 6  | no  |    |
| at_locus.04519 | 3 | 10,322,105 | 10,322,325 | 26 | 0  | 1  | no  | TE |
| at_locus.04520 | 3 | 10,326,470 | 10,326,489 | 0  | 0  | 6  | no  |    |
| at_locus.04521 | 3 | 10,330,217 | 10,330,395 | 6  | 18 | 4  | yes |    |
| at_locus.04522 | 3 | 10,340,968 | 10,341,090 | 5  | 0  | 0  | yes | TE |
| at_locus.04523 | 3 | 10,341,341 | 10,341,694 | 5  | 0  | 0  | yes | TE |
| at_locus.04524 | 3 | 10,346,486 | 10,346,788 | 14 | 1  | 0  | yes | TE |
| at_locus.04525 | 3 | 10,374,137 | 10,375,767 | 18 | 0  | 17 | yes | TE |
| at_locus.04526 | 3 | 10,389,853 | 10,390,185 | 13 | 0  | 14 | yes |    |
| at_locus.04527 | 3 | 10,400,750 | 10,400,787 | 5  | 0  | 0  | yes |    |
| at_locus.04528 | 3 | 10,406,633 | 10,407,161 | 37 | 1  | 0  | yes | TE |
| at_locus.04529 | 3 | 10,407,426 | 10,407,579 | 61 | 2  | 4  | no  | TE |
| at_locus.04530 | 3 | 10,408,469 | 10,408,498 | 7  | 0  | 0  | no  | TE |
| at_locus.04531 | 3 | 10,415,271 | 10,415,443 | 33 | 2  | 4  | no  | TE |
| at_locus.04532 | 3 | 10,415,691 | 10,416,254 | 1  | 0  | 3  | no  | TE |
| at_locus.04533 | 3 | 10,418,122 | 10,418,971 | 31 | 0  | 23 | yes | TE |
| at_locus.04534 | 3 | 10,435,508 | 10,435,562 | 6  | 0  | 0  | yes |    |
| at_locus.04535 | 3 | 10,442,524 | 10,443,137 | 18 | 0  | 1  | yes | TE |
| at_locus.04536 | 3 | 10,458,812 | 10,459,465 | 16 | 0  | 3  | no  | TE |
| at_locus.04537 | 3 | 10,460,758 | 10,461,192 | 5  | 0  | 15 | yes | TE |
| at_locus.04538 | 3 | 10,462,592 | 10,463,819 | 18 | 0  | 18 | no  | TE |
| at_locus.04539 | 3 | 10,466,236 | 10,466,289 | 4  | 0  | 0  | yes | TE |
| at_locus.04540 | 3 | 10,478,717 | 10,478,851 | 8  | 0  | 0  | yes | TE |
| at_locus.04541 | 3 | 10,510,856 | 10,510,925 | 7  | 0  | 0  | no  | TE |
| at_locus.04542 | 3 | 10,511,190 | 10,511,322 | 4  | 0  | 1  | no  | TE |
| at_locus.04543 | 3 | 10,511,813 | 10,512,121 | 1  | 0  | 5  | yes | TE |
| at_locus.04544 | 3 | 10,512,448 | 10,512,708 | 8  | 0  | 0  | no  | TE |
| at_locus.04545 | 3 | 10,515,330 | 10,515,537 | 17 | 0  | 0  | yes |    |
| at_locus.04546 | 3 | 10,518,954 | 10,519,185 | 8  | 0  | 0  | yes |    |
| at_locus.04547 | 3 | 10,523,385 | 10,523,720 | 10 | 0  | 4  | yes | TE |
| at_locus.04548 | 3 | 10,527,323 | 10,527,456 | 4  | 0  | 0  | yes |    |
| at_locus.04549 | 3 | 10,532,102 | 10,532,129 | 5  | 0  | 2  | yes | TE |
| at_locus.04550 | 3 | 10,553,799 | 10,553,954 | 10 | 1  | 0  | no  | TE |

|                |   |            |            |     |   |     |     |    |
|----------------|---|------------|------------|-----|---|-----|-----|----|
| at_locus.04551 | 3 | 10,557,591 | 10,558,091 | 22  | 0 | 0   | no  | TE |
| at_locus.04552 | 3 | 10,558,386 | 10,558,585 | 13  | 0 | 0   | no  | TE |
| at_locus.04553 | 3 | 10,560,707 | 10,560,898 | 4   | 0 | 2   | yes |    |
| at_locus.04554 | 3 | 10,572,032 | 10,572,187 | 10  | 1 | 0   | no  | TE |
| at_locus.04555 | 3 | 10,575,811 | 10,576,320 | 27  | 0 | 1   | no  | TE |
| at_locus.04556 | 3 | 10,655,230 | 10,655,408 | 10  | 0 | 0   | yes | TE |
| at_locus.04557 | 3 | 10,667,743 | 10,667,946 | 7   | 0 | 0   | yes | TE |
| at_locus.04558 | 3 | 10,682,625 | 10,682,765 | 18  | 0 | 0   | no  | TE |
| at_locus.04559 | 3 | 10,683,035 | 10,683,143 | 4   | 0 | 0   | no  | TE |
| at_locus.04560 | 3 | 10,691,850 | 10,692,001 | 15  | 0 | 4   | yes |    |
| at_locus.04561 | 3 | 10,692,351 | 10,693,502 | 308 | 6 | 189 | yes | TE |
| at_locus.04562 | 3 | 10,693,855 | 10,694,042 | 5   | 0 | 4   | yes |    |
| at_locus.04563 | 3 | 10,694,279 | 10,694,338 | 4   | 0 | 0   | yes |    |
| at_locus.04564 | 3 | 10,702,446 | 10,703,028 | 4   | 0 | 5   | no  |    |
| at_locus.04565 | 3 | 10,703,319 | 10,703,604 | 4   | 0 | 5   | yes |    |
| at_locus.04566 | 3 | 10,703,886 | 10,704,540 | 5   | 0 | 1   | no  |    |
| at_locus.04567 | 3 | 10,709,876 | 10,710,381 | 17  | 1 | 0   | no  | TE |
| at_locus.04568 | 3 | 10,719,129 | 10,719,548 | 38  | 0 | 0   | no  | TE |
| at_locus.04569 | 3 | 10,720,548 | 10,720,702 | 5   | 0 | 0   | yes |    |
| at_locus.04570 | 3 | 10,721,061 | 10,721,125 | 4   | 1 | 0   | yes |    |
| at_locus.04571 | 3 | 10,748,942 | 10,750,804 | 124 | 4 | 108 | yes |    |
| at_locus.04572 | 3 | 10,752,436 | 10,752,787 | 11  | 0 | 0   | no  | TE |
| at_locus.04574 | 3 | 10,759,274 | 10,759,817 | 49  | 0 | 1   | no  | TE |
| at_locus.04576 | 3 | 10,764,286 | 10,764,455 | 20  | 0 | 1   | yes | TE |
| at_locus.04577 | 3 | 10,765,453 | 10,765,583 | 8   | 0 | 1   | no  | TE |
| at_locus.04578 | 3 | 10,766,172 | 10,766,288 | 4   | 0 | 1   | yes | TE |
| at_locus.04579 | 3 | 10,767,373 | 10,767,601 | 8   | 0 | 6   | yes |    |
| at_locus.04580 | 3 | 10,778,747 | 10,778,828 | 8   | 0 | 0   | yes |    |
| at_locus.04581 | 3 | 10,792,401 | 10,792,671 | 4   | 0 | 0   | no  |    |
| at_locus.04582 | 3 | 10,813,232 | 10,813,622 | 2   | 0 | 6   | no  | TE |
| at_locus.04583 | 3 | 10,817,423 | 10,817,695 | 8   | 0 | 0   | no  | TE |
| at_locus.04584 | 3 | 10,818,348 | 10,819,366 | 12  | 1 | 17  | yes | TE |
| at_locus.04585 | 3 | 10,820,801 | 10,821,947 | 33  | 2 | 1   | no  | TE |
| at_locus.04586 | 3 | 10,822,598 | 10,822,683 | 14  | 0 | 0   | no  | TE |
| at_locus.04587 | 3 | 10,827,266 | 10,827,588 | 2   | 0 | 8   | yes |    |
| at_locus.04588 | 3 | 10,835,875 | 10,835,995 | 5   | 0 | 0   | yes | TE |
| at_locus.04589 | 3 | 10,841,733 | 10,841,795 | 9   | 0 | 0   | yes | TE |

|                |   |            |            |    |   |    |     |    |
|----------------|---|------------|------------|----|---|----|-----|----|
| at_locus.04590 | 3 | 10,842,799 | 10,842,998 | 4  | 0 | 2  | no  | TE |
| at_locus.04591 | 3 | 10,863,638 | 10,863,869 | 9  | 0 | 0  | no  | TE |
| at_locus.04592 | 3 | 10,864,156 | 10,864,342 | 5  | 0 | 0  | yes | TE |
| at_locus.04593 | 3 | 10,865,510 | 10,866,466 | 16 | 0 | 6  | no  | TE |
| at_locus.04594 | 3 | 10,866,504 | 10,867,156 | 5  | 1 | 9  | no  | TE |
| at_locus.04595 | 3 | 10,902,001 | 10,902,087 | 5  | 0 | 0  | no  | TE |
| at_locus.04596 | 3 | 10,909,375 | 10,909,533 | 4  | 0 | 2  | yes |    |
| at_locus.04597 | 3 | 10,922,467 | 10,922,834 | 1  | 0 | 4  | yes | TE |
| at_locus.04598 | 3 | 10,926,155 | 10,926,361 | 0  | 4 | 3  | yes |    |
| at_locus.04599 | 3 | 10,929,030 | 10,929,314 | 7  | 0 | 2  | yes |    |
| at_locus.04600 | 3 | 10,939,139 | 10,939,603 | 22 | 0 | 0  | yes |    |
| at_locus.04601 | 3 | 10,947,333 | 10,949,010 | 52 | 2 | 75 | yes |    |
| at_locus.04602 | 3 | 10,959,921 | 10,959,991 | 5  | 0 | 0  | no  | TE |
| at_locus.04603 | 3 | 10,971,486 | 10,971,730 | 13 | 1 | 0  | no  | TE |
| at_locus.04604 | 3 | 10,972,157 | 10,972,314 | 5  | 0 | 2  | yes | TE |
| at_locus.04605 | 3 | 10,973,495 | 10,974,032 | 0  | 0 | 4  | yes | TE |
| at_locus.04606 | 3 | 10,976,676 | 10,976,951 | 4  | 0 | 0  | no  | TE |
| at_locus.04607 | 3 | 10,981,376 | 10,981,534 | 4  | 0 | 0  | yes | TE |
| at_locus.04608 | 3 | 10,981,764 | 10,981,813 | 7  | 0 | 0  | yes | TE |
| at_locus.04609 | 3 | 10,998,733 | 10,998,844 | 7  | 0 | 0  | no  | TE |
| at_locus.04610 | 3 | 11,022,992 | 11,023,735 | 18 | 0 | 2  | yes | TE |
| at_locus.04611 | 3 | 11,025,581 | 11,026,327 | 27 | 0 | 27 | yes |    |
| at_locus.04612 | 3 | 11,042,924 | 11,043,153 | 4  | 0 | 0  | yes |    |
| at_locus.04613 | 3 | 11,043,894 | 11,044,264 | 30 | 1 | 38 | yes |    |
| at_locus.04614 | 3 | 11,044,966 | 11,045,002 | 19 | 3 | 1  | yes |    |
| at_locus.04615 | 3 | 11,054,390 | 11,054,424 | 6  | 0 | 0  | yes | TE |
| at_locus.04616 | 3 | 11,055,207 | 11,057,541 | 87 | 4 | 32 | yes | TE |
| at_locus.04617 | 3 | 11,057,767 | 11,060,536 | 55 | 0 | 83 | yes | TE |
| at_locus.04618 | 3 | 11,060,745 | 11,064,108 | 92 | 4 | 92 | yes | TE |
| at_locus.04619 | 3 | 11,071,513 | 11,072,402 | 3  | 0 | 14 | yes |    |
| at_locus.04620 | 3 | 11,080,231 | 11,080,515 | 23 | 1 | 2  | yes | TE |
| at_locus.04621 | 3 | 11,080,719 | 11,080,741 | 1  | 0 | 5  | yes |    |
| at_locus.04622 | 3 | 11,081,482 | 11,081,520 | 7  | 0 | 0  | no  |    |
| at_locus.04623 | 3 | 11,087,713 | 11,087,817 | 4  | 0 | 0  | no  |    |
| at_locus.04624 | 3 | 11,090,994 | 11,091,053 | 9  | 0 | 0  | yes | TE |
| at_locus.04625 | 3 | 11,091,675 | 11,092,212 | 31 | 1 | 0  | yes | TE |
| at_locus.04626 | 3 | 11,095,550 | 11,095,866 | 11 | 0 | 0  | yes |    |

|                |   |            |            |    |   |    |     |    |
|----------------|---|------------|------------|----|---|----|-----|----|
| at_locus.04627 | 3 | 11,098,539 | 11,098,579 | 4  | 0 | 0  | no  | TE |
| at_locus.04628 | 3 | 11,099,789 | 11,100,086 | 4  | 0 | 1  | no  | TE |
| at_locus.04629 | 3 | 11,100,686 | 11,101,537 | 18 | 0 | 14 | yes | TE |
| at_locus.04630 | 3 | 11,121,607 | 11,121,963 | 5  | 0 | 0  | yes | TE |
| at_locus.04631 | 3 | 11,133,496 | 11,133,980 | 12 | 0 | 0  | no  | TE |
| at_locus.04632 | 3 | 11,141,585 | 11,141,657 | 9  | 0 | 0  | yes |    |
| at_locus.04633 | 3 | 11,145,648 | 11,145,673 | 4  | 0 | 0  | no  | TE |
| at_locus.04634 | 3 | 11,146,895 | 11,147,376 | 1  | 0 | 4  | yes | TE |
| at_locus.04635 | 3 | 11,160,104 | 11,160,167 | 6  | 1 | 0  | yes | TE |
| at_locus.04636 | 3 | 11,163,973 | 11,164,181 | 20 | 0 | 1  | yes | TE |
| at_locus.04637 | 3 | 11,168,348 | 11,168,570 | 9  | 1 | 1  | no  | TE |
| at_locus.04638 | 3 | 11,178,117 | 11,178,641 | 7  | 0 | 13 | no  | TE |
| at_locus.04639 | 3 | 11,178,746 | 11,178,802 | 0  | 0 | 4  | no  | TE |
| at_locus.04640 | 3 | 11,181,836 | 11,182,349 | 16 | 0 | 5  | no  | TE |
| at_locus.04641 | 3 | 11,182,551 | 11,182,846 | 22 | 0 | 21 | yes | TE |
| at_locus.04642 | 3 | 11,183,638 | 11,184,044 | 34 | 0 | 31 | yes | TE |
| at_locus.04643 | 3 | 11,184,565 | 11,184,886 | 9  | 1 | 3  | yes |    |
| at_locus.04644 | 3 | 11,185,866 | 11,186,112 | 11 | 0 | 1  | yes | TE |
| at_locus.04645 | 3 | 11,187,265 | 11,187,825 | 10 | 0 | 7  | yes | TE |
| at_locus.04646 | 3 | 11,197,941 | 11,198,138 | 4  | 0 | 1  | no  |    |
| at_locus.04647 | 3 | 11,201,861 | 11,201,898 | 8  | 0 | 0  | no  | TE |
| at_locus.04648 | 3 | 11,202,197 | 11,202,231 | 10 | 0 | 0  | no  | TE |
| at_locus.04649 | 3 | 11,202,797 | 11,202,981 | 0  | 0 | 4  | no  | TE |
| at_locus.04650 | 3 | 11,203,950 | 11,204,010 | 4  | 0 | 0  | no  | TE |
| at_locus.04651 | 3 | 11,206,310 | 11,207,149 | 60 | 3 | 9  | no  | TE |
| at_locus.04652 | 3 | 11,216,757 | 11,216,857 | 4  | 1 | 0  | yes | TE |
| at_locus.04653 | 3 | 11,222,286 | 11,222,454 | 19 | 0 | 0  | yes |    |
| at_locus.04654 | 3 | 11,226,242 | 11,227,060 | 22 | 1 | 8  | yes | TE |
| at_locus.04655 | 3 | 11,227,302 | 11,228,523 | 27 | 2 | 12 | yes | TE |
| at_locus.04656 | 3 | 11,229,702 | 11,231,182 | 25 | 0 | 32 | yes |    |
| at_locus.04657 | 3 | 11,231,401 | 11,231,849 | 5  | 0 | 13 | yes |    |
| at_locus.04658 | 3 | 11,245,889 | 11,246,525 | 11 | 0 | 1  | yes |    |
| at_locus.04659 | 3 | 11,285,049 | 11,285,181 | 5  | 0 | 0  | yes | TE |
| at_locus.04660 | 3 | 11,290,050 | 11,290,271 | 11 | 1 | 9  | yes |    |
| at_locus.04661 | 3 | 11,297,694 | 11,297,939 | 16 | 0 | 1  | yes | TE |
| at_locus.04662 | 3 | 11,317,394 | 11,317,789 | 5  | 0 | 2  | yes | TE |
| at_locus.04663 | 3 | 11,317,859 | 11,318,557 | 15 | 0 | 8  | yes | TE |

|                |   |            |            |    |   |    |     |    |
|----------------|---|------------|------------|----|---|----|-----|----|
| at_locus.04664 | 3 | 11,320,444 | 11,320,586 | 19 | 0 | 6  | no  | TE |
| at_locus.04665 | 3 | 11,322,698 | 11,323,219 | 19 | 0 | 13 | yes | TE |
| at_locus.04666 | 3 | 11,330,037 | 11,332,091 | 33 | 0 | 36 | yes | TE |
| at_locus.04667 | 3 | 11,332,298 | 11,333,323 | 9  | 0 | 21 | yes | TE |
| at_locus.04668 | 3 | 11,333,528 | 11,335,210 | 19 | 0 | 31 | no  | TE |
| at_locus.04669 | 3 | 11,335,375 | 11,335,864 | 9  | 0 | 3  | no  | TE |
| at_locus.04670 | 3 | 11,336,235 | 11,336,595 | 13 | 1 | 5  | no  | TE |
| at_locus.04671 | 3 | 11,336,811 | 11,337,080 | 15 | 0 | 1  | no  | TE |
| at_locus.04672 | 3 | 11,340,302 | 11,340,568 | 2  | 0 | 6  | no  | TE |
| at_locus.04673 | 3 | 11,341,652 | 11,341,941 | 1  | 0 | 4  | no  | TE |
| at_locus.04674 | 3 | 11,342,740 | 11,343,087 | 17 | 0 | 1  | no  | TE |
| at_locus.04675 | 3 | 11,347,015 | 11,347,059 | 4  | 0 | 0  | no  | TE |
| at_locus.04676 | 3 | 11,355,342 | 11,355,394 | 0  | 0 | 3  | no  | TE |
| at_locus.04677 | 3 | 11,356,786 | 11,356,838 | 0  | 0 | 3  | no  | TE |
| at_locus.04678 | 3 | 11,365,211 | 11,365,387 | 4  | 0 | 1  | yes | TE |
| at_locus.04679 | 3 | 11,366,776 | 11,367,162 | 2  | 0 | 2  | yes |    |
| at_locus.04680 | 3 | 11,372,419 | 11,372,926 | 30 | 2 | 10 | no  | TE |
| at_locus.04681 | 3 | 11,373,256 | 11,373,616 | 7  | 0 | 3  | no  | TE |
| at_locus.04682 | 3 | 11,375,686 | 11,375,793 | 0  | 0 | 4  | no  | TE |
| at_locus.04683 | 3 | 11,376,025 | 11,376,212 | 4  | 0 | 4  | no  | TE |
| at_locus.04684 | 3 | 11,376,429 | 11,377,475 | 13 | 1 | 9  | yes | TE |
| at_locus.04685 | 3 | 11,379,542 | 11,380,090 | 36 | 2 | 8  | yes | TE |
| at_locus.04686 | 3 | 11,380,299 | 11,380,677 | 12 | 0 | 3  | no  | TE |
| at_locus.04687 | 3 | 11,380,893 | 11,381,130 | 8  | 0 | 1  | no  | TE |
| at_locus.04688 | 3 | 11,381,346 | 11,382,036 | 13 | 0 | 2  | no  | TE |
| at_locus.04689 | 3 | 11,382,252 | 11,382,942 | 12 | 0 | 3  | no  | TE |
| at_locus.04690 | 3 | 11,399,512 | 11,399,630 | 17 | 0 | 0  | no  | TE |
| at_locus.04691 | 3 | 11,409,995 | 11,410,888 | 10 | 1 | 7  | yes | TE |
| at_locus.04692 | 3 | 11,412,068 | 11,412,218 | 3  | 0 | 8  | yes | TE |
| at_locus.04693 | 3 | 11,419,585 | 11,419,973 | 3  | 0 | 8  | yes | TE |
| at_locus.04694 | 3 | 11,420,191 | 11,420,279 | 7  | 0 | 2  | no  | TE |
| at_locus.04695 | 3 | 11,420,652 | 11,420,880 | 2  | 0 | 5  | no  | TE |
| at_locus.04696 | 3 | 11,424,991 | 11,425,393 | 6  | 0 | 5  | yes | TE |
| at_locus.04697 | 3 | 11,425,838 | 11,426,226 | 5  | 0 | 8  | no  | TE |
| at_locus.04698 | 3 | 11,426,456 | 11,426,715 | 9  | 0 | 4  | no  | TE |
| at_locus.04699 | 3 | 11,434,949 | 11,434,974 | 4  | 0 | 0  | yes |    |
| at_locus.04700 | 3 | 11,436,772 | 11,437,001 | 1  | 0 | 4  | yes | TE |

|                |   |            |            |    |   |    |     |    |
|----------------|---|------------|------------|----|---|----|-----|----|
| at_locus.04701 | 3 | 11,438,414 | 11,439,168 | 22 | 2 | 14 | yes |    |
| at_locus.04702 | 3 | 11,440,143 | 11,440,897 | 22 | 2 | 13 | no  |    |
| at_locus.04703 | 3 | 11,448,026 | 11,448,355 | 7  | 0 | 2  | no  | TE |
| at_locus.04704 | 3 | 11,454,954 | 11,455,080 | 5  | 0 | 0  | yes |    |
| at_locus.04705 | 3 | 11,465,654 | 11,465,753 | 4  | 0 | 0  | no  |    |
| at_locus.04706 | 3 | 11,473,072 | 11,473,949 | 2  | 0 | 17 | yes |    |
| at_locus.04707 | 3 | 11,474,424 | 11,474,557 | 0  | 0 | 4  | yes |    |
| at_locus.04708 | 3 | 11,474,989 | 11,475,394 | 0  | 0 | 5  | yes |    |
| at_locus.04709 | 3 | 11,481,588 | 11,483,483 | 4  | 0 | 29 | yes |    |
| at_locus.04710 | 3 | 11,491,915 | 11,492,194 | 5  | 0 | 4  | no  | TE |
| at_locus.04711 | 3 | 11,492,518 | 11,492,771 | 6  | 0 | 4  | yes | TE |
| at_locus.04712 | 3 | 11,495,335 | 11,495,690 | 7  | 0 | 1  | no  | TE |
| at_locus.04713 | 3 | 11,498,467 | 11,498,799 | 8  | 0 | 3  | no  | TE |
| at_locus.04714 | 3 | 11,499,200 | 11,499,340 | 0  | 0 | 4  | no  | TE |
| at_locus.04715 | 3 | 11,505,627 | 11,506,018 | 39 | 2 | 0  | no  | TE |
| at_locus.04716 | 3 | 11,511,681 | 11,511,737 | 6  | 0 | 0  | yes | TE |
| at_locus.04717 | 3 | 11,518,772 | 11,519,002 | 0  | 0 | 4  | no  | TE |
| at_locus.04718 | 3 | 11,537,185 | 11,537,358 | 4  | 0 | 0  | yes | TE |
| at_locus.04719 | 3 | 11,538,323 | 11,538,408 | 16 | 0 | 0  | no  | TE |
| at_locus.04720 | 3 | 11,538,839 | 11,539,681 | 52 | 2 | 1  | no  | TE |
| at_locus.04721 | 3 | 11,540,123 | 11,540,257 | 25 | 0 | 0  | no  | TE |
| at_locus.04722 | 3 | 11,547,002 | 11,547,111 | 6  | 0 | 1  | no  | TE |
| at_locus.04723 | 3 | 11,547,470 | 11,547,776 | 4  | 0 | 5  | no  | TE |
| at_locus.04724 | 3 | 11,550,176 | 11,550,363 | 0  | 2 | 5  | no  | TE |
| at_locus.04725 | 3 | 11,550,669 | 11,550,945 | 1  | 0 | 4  | yes | TE |
| at_locus.04726 | 3 | 11,554,619 | 11,556,236 | 26 | 4 | 30 | no  | TE |
| at_locus.04727 | 3 | 11,564,804 | 11,565,015 | 5  | 0 | 2  | no  | TE |
| at_locus.04728 | 3 | 11,569,624 | 11,570,615 | 9  | 0 | 6  | no  | TE |
| at_locus.04729 | 3 | 11,589,824 | 11,590,016 | 11 | 0 | 1  | no  | TE |
| at_locus.04730 | 3 | 11,591,215 | 11,591,331 | 13 | 0 | 0  | no  | TE |
| at_locus.04731 | 3 | 11,602,654 | 11,603,122 | 6  | 0 | 0  | yes |    |
| at_locus.04732 | 3 | 11,604,970 | 11,605,159 | 15 | 0 | 0  | yes | TE |
| at_locus.04733 | 3 | 11,605,873 | 11,605,943 | 4  | 0 | 1  | no  | TE |
| at_locus.04734 | 3 | 11,609,905 | 11,610,077 | 4  | 0 | 2  | no  | TE |
| at_locus.04735 | 3 | 11,616,182 | 11,616,599 | 1  | 0 | 9  | yes |    |
| at_locus.04736 | 3 | 11,616,625 | 11,617,032 | 10 | 1 | 12 | yes |    |
| at_locus.04737 | 3 | 11,621,310 | 11,621,693 | 4  | 0 | 9  | yes | TE |

|                |   |            |            |    |   |    |     |    |
|----------------|---|------------|------------|----|---|----|-----|----|
| at_locus.04738 | 3 | 11,622,044 | 11,622,503 | 12 | 0 | 20 | yes | TE |
| at_locus.04739 | 3 | 11,627,955 | 11,628,128 | 4  | 0 | 0  | yes |    |
| at_locus.04740 | 3 | 11,628,613 | 11,628,644 | 4  | 0 | 2  | yes |    |
| at_locus.04741 | 3 | 11,630,595 | 11,631,401 | 11 | 0 | 8  | yes |    |
| at_locus.04742 | 3 | 11,636,744 | 11,636,780 | 2  | 0 | 4  | no  | TE |
| at_locus.04743 | 3 | 11,637,238 | 11,637,918 | 4  | 0 | 16 | yes | TE |
| at_locus.04744 | 3 | 11,638,642 | 11,639,006 | 4  | 0 | 3  | yes | TE |
| at_locus.04745 | 3 | 11,639,272 | 11,639,802 | 6  | 0 | 12 | no  | TE |
| at_locus.04746 | 3 | 11,641,203 | 11,641,324 | 12 | 0 | 1  | yes | TE |
| at_locus.04747 | 3 | 11,642,166 | 11,642,194 | 6  | 0 | 2  | yes | TE |
| at_locus.04748 | 3 | 11,643,906 | 11,643,929 | 5  | 0 | 0  | yes | TE |
| at_locus.04749 | 3 | 11,647,737 | 11,647,919 | 8  | 0 | 0  | yes |    |
| at_locus.04750 | 3 | 11,660,276 | 11,661,044 | 19 | 0 | 6  | yes | TE |
| at_locus.04751 | 3 | 11,661,324 | 11,662,359 | 13 | 1 | 20 | yes | TE |
| at_locus.04752 | 3 | 11,691,785 | 11,691,921 | 9  | 0 | 1  | yes | TE |
| at_locus.04753 | 3 | 11,697,444 | 11,697,727 | 8  | 0 | 7  | yes | TE |
| at_locus.04754 | 3 | 11,725,625 | 11,726,227 | 23 | 0 | 6  | yes | TE |
| at_locus.04755 | 3 | 11,728,863 | 11,729,217 | 28 | 0 | 2  | no  | TE |
| at_locus.04756 | 3 | 11,729,318 | 11,729,565 | 0  | 0 | 1  | no  | TE |
| at_locus.04757 | 3 | 11,729,901 | 11,730,032 | 21 | 0 | 0  | no  | TE |
| at_locus.04758 | 3 | 11,743,813 | 11,744,224 | 6  | 0 | 14 | yes | TE |
| at_locus.04759 | 3 | 11,744,470 | 11,744,781 | 7  | 0 | 3  | yes | TE |
| at_locus.04760 | 3 | 11,749,326 | 11,749,473 | 5  | 0 | 0  | yes |    |
| at_locus.04761 | 3 | 11,750,271 | 11,750,299 | 0  | 9 | 0  | yes |    |
| at_locus.04762 | 3 | 11,766,301 | 11,766,497 | 4  | 1 | 6  | yes | TE |
| at_locus.04763 | 3 | 11,766,873 | 11,767,633 | 11 | 0 | 6  | yes | TE |
| at_locus.04764 | 3 | 11,770,758 | 11,771,031 | 1  | 0 | 4  | yes |    |
| at_locus.04765 | 3 | 11,786,351 | 11,786,474 | 0  | 0 | 4  | no  | TE |
| at_locus.04766 | 3 | 11,797,623 | 11,798,239 | 0  | 1 | 6  | yes | TE |
| at_locus.04767 | 3 | 11,819,265 | 11,819,288 | 5  | 0 | 0  | no  | TE |
| at_locus.04768 | 3 | 11,822,581 | 11,822,613 | 0  | 0 | 6  | yes |    |
| at_locus.04769 | 3 | 11,822,845 | 11,823,332 | 2  | 0 | 5  | yes |    |
| at_locus.04770 | 3 | 11,823,649 | 11,824,541 | 12 | 0 | 15 | yes | TE |
| at_locus.04771 | 3 | 11,830,220 | 11,830,243 | 4  | 0 | 0  | no  |    |
| at_locus.04772 | 3 | 11,855,057 | 11,855,087 | 5  | 1 | 4  | no  |    |
| at_locus.04773 | 3 | 11,862,485 | 11,862,562 | 0  | 0 | 4  | yes | TE |
| at_locus.04774 | 3 | 11,862,626 | 11,862,671 | 6  | 0 | 0  | no  | TE |

|                |   |            |            |    |   |    |     |    |
|----------------|---|------------|------------|----|---|----|-----|----|
| at_locus.04775 | 3 | 11,865,081 | 11,865,311 | 4  | 0 | 1  | yes | TE |
| at_locus.04776 | 3 | 11,866,051 | 11,866,122 | 5  | 0 | 0  | yes | TE |
| at_locus.04777 | 3 | 11,866,614 | 11,866,778 | 7  | 1 | 1  | no  | TE |
| at_locus.04778 | 3 | 11,871,614 | 11,871,785 | 4  | 0 | 2  | no  | TE |
| at_locus.04779 | 3 | 11,896,108 | 11,896,279 | 4  | 0 | 2  | no  | TE |
| at_locus.04780 | 3 | 11,897,663 | 11,897,715 | 4  | 0 | 0  | yes |    |
| at_locus.04781 | 3 | 11,902,382 | 11,902,790 | 6  | 0 | 0  | yes | TE |
| at_locus.04782 | 3 | 11,903,424 | 11,903,623 | 4  | 1 | 0  | no  | TE |
| at_locus.04783 | 3 | 11,904,142 | 11,904,384 | 1  | 0 | 5  | no  | TE |
| at_locus.04784 | 3 | 11,907,260 | 11,907,414 | 6  | 0 | 0  | no  | TE |
| at_locus.04785 | 3 | 11,939,974 | 11,940,551 | 1  | 0 | 7  | yes | TE |
| at_locus.04786 | 3 | 11,941,026 | 11,941,353 | 1  | 0 | 4  | no  | TE |
| at_locus.04787 | 3 | 11,942,746 | 11,942,767 | 0  | 0 | 4  | no  | TE |
| at_locus.04788 | 3 | 11,947,457 | 11,947,491 | 2  | 0 | 5  | no  | TE |
| at_locus.04789 | 3 | 11,951,213 | 11,951,413 | 4  | 0 | 0  | yes | TE |
| at_locus.04790 | 3 | 11,962,716 | 11,962,744 | 5  | 0 | 0  | no  | TE |
| at_locus.04791 | 3 | 11,970,331 | 11,970,977 | 94 | 3 | 0  | no  | TE |
| at_locus.04792 | 3 | 11,974,688 | 11,974,900 | 4  | 0 | 2  | no  |    |
| at_locus.04793 | 3 | 11,986,203 | 11,986,478 | 17 | 0 | 0  | yes | TE |
| at_locus.04794 | 3 | 11,990,914 | 11,991,205 | 7  | 0 | 0  | no  |    |
| at_locus.04795 | 3 | 11,994,638 | 11,994,929 | 7  | 0 | 0  | no  |    |
| at_locus.04796 | 3 | 12,001,565 | 12,002,014 | 4  | 0 | 1  | yes | TE |
| at_locus.04797 | 3 | 12,003,155 | 12,003,703 | 7  | 0 | 2  | no  | TE |
| at_locus.04798 | 3 | 12,008,473 | 12,008,768 | 5  | 0 | 4  | no  | TE |
| at_locus.04799 | 3 | 12,012,413 | 12,012,446 | 10 | 0 | 1  | yes |    |
| at_locus.04800 | 3 | 12,016,219 | 12,016,690 | 4  | 0 | 1  | no  | TE |
| at_locus.04801 | 3 | 12,016,986 | 12,017,637 | 13 | 0 | 5  | no  | TE |
| at_locus.04802 | 3 | 12,018,519 | 12,019,958 | 19 | 1 | 12 | no  | TE |
| at_locus.04803 | 3 | 12,020,101 | 12,020,599 | 5  | 1 | 10 | yes | TE |
| at_locus.04804 | 3 | 12,050,521 | 12,051,166 | 10 | 0 | 15 | no  | TE |
| at_locus.04805 | 3 | 12,051,491 | 12,051,691 | 6  | 0 | 8  | no  | TE |
| at_locus.04806 | 3 | 12,052,089 | 12,052,601 | 13 | 1 | 10 | no  | TE |
| at_locus.04807 | 3 | 12,053,007 | 12,053,340 | 7  | 0 | 6  | yes | TE |
| at_locus.04808 | 3 | 12,053,485 | 12,054,080 | 7  | 0 | 13 | no  | TE |
| at_locus.04809 | 3 | 12,055,389 | 12,055,471 | 4  | 0 | 0  | no  | TE |
| at_locus.04810 | 3 | 12,055,694 | 12,056,324 | 6  | 0 | 8  | yes | TE |
| at_locus.04811 | 3 | 12,056,550 | 12,056,961 | 4  | 0 | 9  | no  | TE |



|                |   |            |            |    |   |    |     |    |
|----------------|---|------------|------------|----|---|----|-----|----|
| at_locus.04812 | 3 | 12,058,729 | 12,059,122 | 1  | 0 | 5  | no  | TE |
| at_locus.04813 | 3 | 12,059,213 | 12,059,819 | 12 | 0 | 3  | no  |    |
| at_locus.04814 | 3 | 12,062,396 | 12,062,725 | 2  | 0 | 4  | no  | TE |
| at_locus.04815 | 3 | 12,064,860 | 12,064,993 | 6  | 0 | 0  | no  | TE |
| at_locus.04816 | 3 | 12,067,866 | 12,067,892 | 0  | 0 | 4  | no  |    |
| at_locus.04817 | 3 | 12,068,872 | 12,068,944 | 2  | 0 | 6  | no  | TE |
| at_locus.04818 | 3 | 12,071,402 | 12,071,554 | 4  | 0 | 0  | no  | TE |
| at_locus.04819 | 3 | 12,073,690 | 12,074,160 | 2  | 0 | 8  | yes | TE |
| at_locus.04820 | 3 | 12,074,440 | 12,074,558 | 0  | 0 | 7  | yes | TE |
| at_locus.04821 | 3 | 12,074,761 | 12,075,230 | 6  | 0 | 6  | yes | TE |
| at_locus.04822 | 3 | 12,075,709 | 12,076,230 | 5  | 0 | 0  | yes | TE |
| at_locus.04823 | 3 | 12,077,084 | 12,077,393 | 0  | 0 | 5  | yes |    |
| at_locus.04824 | 3 | 12,079,926 | 12,080,714 | 14 | 0 | 23 | no  | TE |
| at_locus.04825 | 3 | 12,081,261 | 12,081,389 | 5  | 0 | 4  | no  | TE |
| at_locus.04826 | 3 | 12,081,888 | 12,082,514 | 6  | 0 | 2  | no  | TE |
| at_locus.04827 | 3 | 12,083,396 | 12,083,856 | 8  | 1 | 5  | no  | TE |
| at_locus.04828 | 3 | 12,084,119 | 12,084,334 | 6  | 0 | 1  | no  | TE |
| at_locus.04829 | 3 | 12,084,980 | 12,085,288 | 9  | 0 | 1  | no  | TE |
| at_locus.04830 | 3 | 12,087,327 | 12,088,176 | 10 | 0 | 9  | no  | TE |
| at_locus.04831 | 3 | 12,088,795 | 12,089,176 | 5  | 0 | 1  | no  | TE |
| at_locus.04832 | 3 | 12,089,596 | 12,089,632 | 1  | 0 | 5  | no  | TE |
| at_locus.04833 | 3 | 12,093,466 | 12,094,015 | 8  | 0 | 4  | no  | TE |
| at_locus.04834 | 3 | 12,094,228 | 12,094,967 | 30 | 0 | 27 | yes | TE |
| at_locus.04835 | 3 | 12,101,406 | 12,101,521 | 4  | 0 | 0  | yes |    |
| at_locus.04836 | 3 | 12,108,932 | 12,108,985 | 2  | 0 | 4  | no  | TE |
| at_locus.04837 | 3 | 12,110,971 | 12,111,235 | 0  | 0 | 3  | yes | TE |
| at_locus.04838 | 3 | 12,115,524 | 12,115,741 | 1  | 0 | 5  | no  | TE |
| at_locus.04839 | 3 | 12,116,094 | 12,116,533 | 6  | 0 | 6  | no  | TE |
| at_locus.04840 | 3 | 12,123,190 | 12,123,749 | 7  | 0 | 9  | no  | TE |
| at_locus.04841 | 3 | 12,124,869 | 12,124,949 | 4  | 0 | 0  | yes |    |
| at_locus.04842 | 3 | 12,131,027 | 12,131,315 | 4  | 0 | 3  | no  | TE |
| at_locus.04843 | 3 | 12,131,817 | 12,132,244 | 9  | 1 | 3  | no  | TE |
| at_locus.04844 | 3 | 12,136,474 | 12,136,984 | 21 | 0 | 17 | yes |    |
| at_locus.04845 | 3 | 12,137,354 | 12,137,665 | 6  | 1 | 3  | yes |    |
| at_locus.04846 | 3 | 12,138,267 | 12,138,389 | 5  | 0 | 8  | yes | TE |
| at_locus.04847 | 3 | 12,138,592 | 12,139,124 | 8  | 0 | 1  | no  | TE |
| at_locus.04848 | 3 | 12,139,286 | 12,139,457 | 4  | 0 | 10 | yes | TE |

|                |   |            |            |    |   |    |     |    |
|----------------|---|------------|------------|----|---|----|-----|----|
| at_locus.04849 | 3 | 12,174,143 | 12,174,473 | 5  | 0 | 0  | no  | TE |
| at_locus.04850 | 3 | 12,180,703 | 12,180,726 | 1  | 0 | 4  | no  | TE |
| at_locus.04851 | 3 | 12,180,928 | 12,181,627 | 4  | 0 | 10 | yes | TE |
| at_locus.04852 | 3 | 12,190,377 | 12,190,579 | 2  | 0 | 7  | no  | TE |
| at_locus.04853 | 3 | 12,191,023 | 12,191,335 | 2  | 0 | 6  | no  | TE |
| at_locus.04854 | 3 | 12,191,589 | 12,191,812 | 4  | 0 | 6  | no  | TE |
| at_locus.04855 | 3 | 12,192,783 | 12,193,289 | 4  | 0 | 6  | yes | TE |
| at_locus.04856 | 3 | 12,194,981 | 12,195,212 | 0  | 0 | 4  | no  | TE |
| at_locus.04857 | 3 | 12,205,282 | 12,205,776 | 15 | 0 | 4  | no  | TE |
| at_locus.04858 | 3 | 12,206,124 | 12,206,560 | 1  | 0 | 8  | no  | TE |
| at_locus.04859 | 3 | 12,208,653 | 12,209,156 | 4  | 0 | 6  | no  | TE |
| at_locus.04860 | 3 | 12,213,098 | 12,213,911 | 12 | 0 | 8  | no  | TE |
| at_locus.04861 | 3 | 12,214,131 | 12,216,555 | 38 | 5 | 62 | no  | TE |
| at_locus.04862 | 3 | 12,216,744 | 12,217,343 | 12 | 0 | 14 | no  | TE |
| at_locus.04863 | 3 | 12,217,555 | 12,218,976 | 36 | 0 | 31 | no  | TE |
| at_locus.04864 | 3 | 12,219,440 | 12,219,735 | 6  | 0 | 6  | no  | TE |
| at_locus.04865 | 3 | 12,220,509 | 12,220,886 | 5  | 0 | 7  | no  | TE |
| at_locus.04866 | 3 | 12,221,259 | 12,221,456 | 7  | 0 | 4  | no  | TE |
| at_locus.04867 | 3 | 12,221,499 | 12,221,732 | 0  | 0 | 4  | no  | TE |
| at_locus.04868 | 3 | 12,221,998 | 12,222,200 | 6  | 0 | 2  | no  | TE |
| at_locus.04869 | 3 | 12,222,875 | 12,223,086 | 0  | 0 | 4  | no  | TE |
| at_locus.04870 | 3 | 12,223,629 | 12,223,966 | 4  | 0 | 3  | no  | TE |
| at_locus.04871 | 3 | 12,224,079 | 12,224,638 | 9  | 0 | 7  | no  | TE |
| at_locus.04872 | 3 | 12,224,843 | 12,224,880 | 4  | 0 | 1  | no  | TE |
| at_locus.04873 | 3 | 12,225,246 | 12,225,924 | 8  | 0 | 18 | no  | TE |
| at_locus.04874 | 3 | 12,226,129 | 12,228,610 | 28 | 4 | 50 | no  | TE |
| at_locus.04875 | 3 | 12,229,250 | 12,229,990 | 2  | 0 | 6  | no  | TE |
| at_locus.04876 | 3 | 12,231,262 | 12,231,473 | 4  | 0 | 1  | no  | TE |
| at_locus.04877 | 3 | 12,231,763 | 12,232,209 | 5  | 0 | 2  | no  | TE |
| at_locus.04878 | 3 | 12,233,281 | 12,233,828 | 7  | 0 | 3  | no  | TE |
| at_locus.04879 | 3 | 12,234,491 | 12,235,195 | 2  | 0 | 5  | no  | TE |
| at_locus.04880 | 3 | 12,235,581 | 12,236,122 | 17 | 0 | 6  | yes | TE |
| at_locus.04881 | 3 | 12,239,076 | 12,239,289 | 12 | 0 | 6  | no  |    |
| at_locus.04882 | 3 | 12,241,718 | 12,242,193 | 13 | 0 | 4  | yes |    |
| at_locus.04883 | 3 | 12,242,438 | 12,242,663 | 6  | 0 | 1  | yes |    |
| at_locus.04884 | 3 | 12,244,581 | 12,244,990 | 22 | 0 | 18 | yes |    |
| at_locus.04885 | 3 | 12,245,224 | 12,247,933 | 66 | 1 | 63 | yes | TE |

|                |   |            |            |    |   |    |     |    |
|----------------|---|------------|------------|----|---|----|-----|----|
| at_locus.04886 | 3 | 12,247,957 | 12,248,563 | 16 | 1 | 9  | no  | TE |
| at_locus.04887 | 3 | 12,248,979 | 12,251,653 | 90 | 5 | 88 | no  | TE |
| at_locus.04888 | 3 | 12,251,841 | 12,251,981 | 0  | 0 | 4  | no  | TE |
| at_locus.04889 | 3 | 12,252,564 | 12,252,742 | 11 | 0 | 5  | yes | TE |
| at_locus.04890 | 3 | 12,253,108 | 12,253,188 | 6  | 0 | 3  | no  | TE |
| at_locus.04891 | 3 | 12,253,891 | 12,254,273 | 13 | 0 | 4  | yes | TE |
| at_locus.04892 | 3 | 12,254,549 | 12,255,708 | 13 | 1 | 24 | no  | TE |
| at_locus.04893 | 3 | 12,255,985 | 12,257,415 | 32 | 0 | 44 | no  | TE |
| at_locus.04894 | 3 | 12,259,035 | 12,262,079 | 82 | 3 | 59 | yes | TE |
| at_locus.04895 | 3 | 12,266,528 | 12,266,832 | 4  | 0 | 0  | yes |    |
| at_locus.04896 | 3 | 12,267,454 | 12,268,413 | 31 | 2 | 44 | yes | TE |
| at_locus.04897 | 3 | 12,269,477 | 12,269,820 | 4  | 0 | 5  | yes | TE |
| at_locus.04898 | 3 | 12,270,780 | 12,271,237 | 8  | 0 | 7  | yes | TE |
| at_locus.04899 | 3 | 12,271,957 | 12,272,173 | 5  | 0 | 0  | yes |    |
| at_locus.04900 | 3 | 12,280,580 | 12,280,718 | 1  | 0 | 4  | no  |    |
| at_locus.04901 | 3 | 12,303,498 | 12,303,606 | 5  | 0 | 0  | no  |    |
| at_locus.04902 | 3 | 12,304,963 | 12,306,010 | 9  | 0 | 16 | no  | TE |
| at_locus.04903 | 3 | 12,308,051 | 12,308,387 | 3  | 0 | 4  | no  | TE |
| at_locus.04904 | 3 | 12,309,619 | 12,309,713 | 1  | 0 | 9  | no  | TE |
| at_locus.04905 | 3 | 12,315,404 | 12,316,619 | 25 | 1 | 22 | no  | TE |
| at_locus.04906 | 3 | 12,316,913 | 12,317,102 | 3  | 0 | 5  | no  | TE |
| at_locus.04907 | 3 | 12,319,060 | 12,319,341 | 2  | 0 | 4  | no  | TE |
| at_locus.04908 | 3 | 12,324,277 | 12,324,392 | 4  | 0 | 1  | no  | TE |
| at_locus.04909 | 3 | 12,324,833 | 12,324,943 | 4  | 0 | 3  | no  | TE |
| at_locus.04910 | 3 | 12,325,387 | 12,325,783 | 6  | 1 | 3  | no  | TE |
| at_locus.04911 | 3 | 12,330,271 | 12,330,625 | 8  | 0 | 11 | no  | TE |
| at_locus.04912 | 3 | 12,345,188 | 12,345,719 | 9  | 0 | 12 | no  | TE |
| at_locus.04913 | 3 | 12,355,634 | 12,355,874 | 16 | 1 | 0  | yes | TE |
| at_locus.04914 | 3 | 12,361,231 | 12,361,988 | 40 | 0 | 1  | yes | TE |
| at_locus.04915 | 3 | 12,375,873 | 12,376,159 | 1  | 0 | 5  | no  | TE |
| at_locus.04916 | 3 | 12,386,325 | 12,386,503 | 10 | 0 | 0  | no  | TE |
| at_locus.04917 | 3 | 12,404,036 | 12,404,235 | 5  | 0 | 7  | no  | TE |
| at_locus.04918 | 3 | 12,404,874 | 12,405,335 | 4  | 0 | 7  | no  | TE |
| at_locus.04919 | 3 | 12,405,563 | 12,405,965 | 1  | 0 | 4  | no  | TE |
| at_locus.04920 | 3 | 12,406,637 | 12,406,842 | 5  | 0 | 3  | no  | TE |
| at_locus.04921 | 3 | 12,407,153 | 12,407,781 | 5  | 0 | 11 | no  | TE |
| at_locus.04922 | 3 | 12,408,627 | 12,408,839 | 5  | 0 | 2  | no  | TE |

|                |   |            |            |     |   |     |     |    |
|----------------|---|------------|------------|-----|---|-----|-----|----|
| at_locus.04923 | 3 | 12,412,661 | 12,412,930 | 4   | 0 | 0   | yes | TE |
| at_locus.04924 | 3 | 12,413,648 | 12,414,195 | 4   | 0 | 6   | yes | TE |
| at_locus.04925 | 3 | 12,414,480 | 12,415,299 | 6   | 0 | 15  | no  | TE |
| at_locus.04926 | 3 | 12,415,740 | 12,415,833 | 8   | 0 | 5   | no  | TE |
| at_locus.04927 | 3 | 12,416,247 | 12,416,848 | 8   | 0 | 4   | no  | TE |
| at_locus.04928 | 3 | 12,435,351 | 12,435,545 | 6   | 0 | 2   | no  | TE |
| at_locus.04929 | 3 | 12,438,878 | 12,438,994 | 4   | 0 | 2   | no  | TE |
| at_locus.04930 | 3 | 12,441,542 | 12,442,202 | 8   | 0 | 2   | no  | TE |
| at_locus.04931 | 3 | 12,443,369 | 12,443,580 | 5   | 0 | 2   | no  | TE |
| at_locus.04932 | 3 | 12,457,556 | 12,457,798 | 7   | 0 | 0   | yes | TE |
| at_locus.04933 | 3 | 12,458,443 | 12,458,558 | 5   | 0 | 0   | no  | TE |
| at_locus.04934 | 3 | 12,468,685 | 12,469,238 | 12  | 0 | 3   | yes | TE |
| at_locus.04935 | 3 | 12,469,473 | 12,469,658 | 8   | 0 | 3   | no  | TE |
| at_locus.04936 | 3 | 12,473,747 | 12,473,938 | 4   | 0 | 6   | no  | TE |
| at_locus.04937 | 3 | 12,476,134 | 12,476,149 | 0   | 0 | 4   | no  | TE |
| at_locus.04938 | 3 | 12,480,710 | 12,486,937 | 119 | 3 | 166 | yes | TE |
| at_locus.04939 | 3 | 12,487,158 | 12,487,843 | 9   | 0 | 8   | no  | TE |
| at_locus.04940 | 3 | 12,488,035 | 12,488,849 | 63  | 3 | 16  | yes | TE |
| at_locus.04941 | 3 | 12,504,390 | 12,504,701 | 4   | 0 | 1   | yes | TE |
| at_locus.04942 | 3 | 12,514,234 | 12,515,465 | 13  | 0 | 18  | no  | TE |
| at_locus.04943 | 3 | 12,515,942 | 12,516,396 | 6   | 0 | 4   | yes | TE |
| at_locus.04944 | 3 | 12,516,406 | 12,516,421 | 0   | 0 | 4   | no  | TE |
| at_locus.04945 | 3 | 12,518,841 | 12,519,111 | 2   | 0 | 4   | yes | TE |
| at_locus.04946 | 3 | 12,519,866 | 12,520,025 | 6   | 0 | 10  | no  | TE |
| at_locus.04947 | 3 | 12,524,094 | 12,524,519 | 1   | 0 | 4   | no  | TE |
| at_locus.04948 | 3 | 12,532,614 | 12,532,719 | 0   | 0 | 7   | yes |    |
| at_locus.04949 | 3 | 12,534,805 | 12,535,101 | 5   | 0 | 6   | no  | TE |
| at_locus.04950 | 3 | 12,535,179 | 12,536,990 | 13  | 1 | 22  | yes | TE |
| at_locus.04951 | 3 | 12,537,131 | 12,537,301 | 6   | 0 | 0   | yes | TE |
| at_locus.04952 | 3 | 12,538,259 | 12,538,989 | 9   | 0 | 11  | no  | TE |
| at_locus.04953 | 3 | 12,539,200 | 12,539,791 | 10  | 0 | 11  | yes | TE |
| at_locus.04954 | 3 | 12,540,004 | 12,542,055 | 30  | 4 | 30  | yes | TE |
| at_locus.04955 | 3 | 12,542,262 | 12,542,299 | 8   | 0 | 5   | no  | TE |
| at_locus.04956 | 3 | 12,552,246 | 12,552,784 | 5   | 0 | 2   | no  | TE |
| at_locus.04957 | 3 | 12,557,900 | 12,558,295 | 4   | 0 | 3   | no  | TE |
| at_locus.04958 | 3 | 12,560,390 | 12,560,405 | 0   | 0 | 4   | no  | TE |
| at_locus.04959 | 3 | 12,573,136 | 12,573,190 | 2   | 0 | 0   | no  |    |

|                |   |            |            |    |   |     |     |    |
|----------------|---|------------|------------|----|---|-----|-----|----|
| at_locus.04960 | 3 | 12,574,660 | 12,574,703 | 8  | 0 | 0   | yes | TE |
| at_locus.04961 | 3 | 12,583,619 | 12,585,303 | 27 | 4 | 32  | yes | TE |
| at_locus.04962 | 3 | 12,605,297 | 12,605,671 | 7  | 0 | 1   | yes |    |
| at_locus.04963 | 3 | 12,607,076 | 12,608,403 | 3  | 0 | 14  | yes | TE |
| at_locus.04964 | 3 | 12,611,263 | 12,611,287 | 7  | 0 | 0   | no  |    |
| at_locus.04965 | 3 | 12,612,410 | 12,613,168 | 13 | 0 | 28  | yes | TE |
| at_locus.04966 | 3 | 12,615,918 | 12,617,337 | 68 | 3 | 19  | no  | TE |
| at_locus.04967 | 3 | 12,617,558 | 12,621,974 | 76 | 1 | 150 | yes | TE |
| at_locus.04968 | 3 | 12,622,148 | 12,623,357 | 65 | 2 | 19  | no  | TE |
| at_locus.04969 | 3 | 12,634,766 | 12,634,939 | 8  | 0 | 8   | yes |    |
| at_locus.04970 | 3 | 12,636,735 | 12,637,667 | 2  | 0 | 13  | yes | TE |
| at_locus.04971 | 3 | 12,641,554 | 12,641,716 | 0  | 0 | 4   | yes | TE |
| at_locus.04972 | 3 | 12,641,939 | 12,642,113 | 5  | 0 | 0   | yes | TE |
| at_locus.04973 | 3 | 12,642,559 | 12,643,737 | 17 | 1 | 18  | yes | TE |
| at_locus.04974 | 3 | 12,662,376 | 12,663,494 | 34 | 0 | 5   | no  | TE |
| at_locus.04975 | 3 | 12,663,911 | 12,664,043 | 4  | 0 | 1   | no  | TE |
| at_locus.04976 | 3 | 12,664,309 | 12,664,383 | 25 | 0 | 2   | no  | TE |
| at_locus.04977 | 3 | 12,671,889 | 12,672,309 | 3  | 0 | 5   | yes | TE |
| at_locus.04978 | 3 | 12,672,958 | 12,673,188 | 8  | 1 | 0   | yes | TE |
| at_locus.04979 | 3 | 12,674,545 | 12,674,690 | 4  | 0 | 1   | yes | TE |
| at_locus.04980 | 3 | 12,677,706 | 12,677,877 | 4  | 0 | 3   | no  | TE |
| at_locus.04981 | 3 | 12,708,255 | 12,708,531 | 4  | 0 | 5   | no  | TE |
| at_locus.04982 | 3 | 12,708,750 | 12,709,177 | 0  | 0 | 5   | yes | TE |
| at_locus.04983 | 3 | 12,709,458 | 12,709,984 | 1  | 0 | 5   | no  | TE |
| at_locus.04984 | 3 | 12,711,105 | 12,711,767 | 4  | 0 | 4   | yes | TE |
| at_locus.04985 | 3 | 12,713,239 | 12,713,775 | 8  | 0 | 0   | yes | TE |
| at_locus.04986 | 3 | 12,714,109 | 12,714,397 | 4  | 0 | 6   | no  | TE |
| at_locus.04987 | 3 | 12,714,777 | 12,715,113 | 5  | 0 | 5   | no  | TE |
| at_locus.04988 | 3 | 12,719,214 | 12,719,633 | 4  | 0 | 6   | no  | TE |
| at_locus.04989 | 3 | 12,719,852 | 12,720,305 | 3  | 0 | 11  | no  | TE |
| at_locus.04990 | 3 | 12,724,974 | 12,725,416 | 4  | 0 | 8   | no  | TE |
| at_locus.04991 | 3 | 12,725,647 | 12,726,195 | 6  | 0 | 7   | no  | TE |
| at_locus.04992 | 3 | 12,727,471 | 12,727,681 | 4  | 0 | 1   | no  | TE |
| at_locus.04993 | 3 | 12,737,389 | 12,737,837 | 14 | 2 | 3   | no  | TE |
| at_locus.04994 | 3 | 12,739,122 | 12,740,238 | 16 | 0 | 22  | yes | TE |
| at_locus.04995 | 3 | 12,750,159 | 12,750,370 | 4  | 0 | 2   | no  | TE |
| at_locus.04996 | 3 | 12,761,726 | 12,762,057 | 7  | 0 | 3   | no  | TE |

|                |   |            |            |    |   |    |     |    |
|----------------|---|------------|------------|----|---|----|-----|----|
| at_locus.04997 | 3 | 12,762,811 | 12,763,387 | 6  | 0 | 6  | no  | TE |
| at_locus.04998 | 3 | 12,770,466 | 12,770,699 | 3  | 0 | 4  | no  | TE |
| at_locus.04999 | 3 | 12,781,345 | 12,781,373 | 6  | 0 | 0  | no  | TE |
| at_locus.05000 | 3 | 12,795,470 | 12,795,888 | 4  | 0 | 5  | no  | TE |
| at_locus.05001 | 3 | 12,816,038 | 12,816,066 | 6  | 0 | 0  | no  | TE |
| at_locus.05002 | 3 | 12,827,891 | 12,828,076 | 1  | 0 | 7  | no  | TE |
| at_locus.05003 | 3 | 12,828,408 | 12,828,721 | 5  | 0 | 3  | no  | TE |
| at_locus.05004 | 3 | 12,842,368 | 12,842,707 | 1  | 0 | 4  | no  | TE |
| at_locus.05005 | 3 | 12,856,551 | 12,857,099 | 23 | 2 | 8  | no  | TE |
| at_locus.05006 | 3 | 12,857,324 | 12,858,110 | 16 | 1 | 31 | yes | TE |
| at_locus.05007 | 3 | 12,858,296 | 12,859,500 | 8  | 0 | 28 | no  | TE |
| at_locus.05008 | 3 | 12,859,709 | 12,860,839 | 10 | 0 | 31 | no  | TE |
| at_locus.05009 | 3 | 12,861,182 | 12,862,476 | 29 | 0 | 35 | no  | TE |
| at_locus.05010 | 3 | 12,862,745 | 12,864,187 | 35 | 3 | 12 | no  | TE |
| at_locus.05011 | 3 | 12,942,164 | 12,942,387 | 2  | 0 | 6  | no  | TE |
| at_locus.05012 | 3 | 12,950,964 | 12,951,317 | 6  | 1 | 2  | no  | TE |
| at_locus.05013 | 3 | 12,962,981 | 12,963,492 | 24 | 0 | 8  | no  | TE |
| at_locus.05014 | 3 | 12,963,838 | 12,964,499 | 10 | 1 | 7  | yes | TE |
| at_locus.05015 | 3 | 12,964,720 | 12,967,265 | 38 | 0 | 74 | yes | TE |
| at_locus.05016 | 3 | 12,967,487 | 12,969,354 | 29 | 1 | 69 | no  | TE |
| at_locus.05017 | 3 | 12,969,586 | 12,969,618 | 1  | 0 | 6  | no  | TE |
| at_locus.05018 | 3 | 12,969,865 | 12,970,468 | 65 | 3 | 13 | no  | TE |
| at_locus.05019 | 3 | 12,970,752 | 12,970,884 | 6  | 0 | 0  | no  | TE |
| at_locus.05020 | 3 | 12,985,168 | 12,986,545 | 19 | 1 | 20 | yes | TE |
| at_locus.05021 | 3 | 12,986,761 | 12,987,099 | 3  | 0 | 5  | no  | TE |
| at_locus.05022 | 3 | 12,987,391 | 12,988,112 | 16 | 1 | 20 | no  | TE |
| at_locus.05023 | 3 | 12,988,443 | 12,988,731 | 8  | 0 | 1  | no  | TE |
| at_locus.05024 | 3 | 12,989,123 | 12,989,211 | 0  | 0 | 4  | no  | TE |
| at_locus.05025 | 3 | 12,989,374 | 12,989,652 | 6  | 0 | 6  | no  | TE |
| at_locus.05026 | 3 | 12,990,818 | 12,992,908 | 36 | 4 | 43 | yes | TE |
| at_locus.05027 | 3 | 12,993,168 | 12,993,713 | 9  | 0 | 9  | no  | TE |
| at_locus.05028 | 3 | 12,993,940 | 12,994,332 | 11 | 0 | 10 | no  | TE |
| at_locus.05029 | 3 | 12,994,410 | 12,995,984 | 24 | 1 | 23 | no  | TE |
| at_locus.05030 | 3 | 13,050,424 | 13,050,779 | 11 | 0 | 3  | yes |    |
| at_locus.05031 | 3 | 13,118,869 | 13,119,137 | 9  | 0 | 2  | no  | TE |
| at_locus.05032 | 3 | 13,127,734 | 13,127,997 | 6  | 0 | 0  | no  | TE |
| at_locus.05033 | 3 | 13,129,092 | 13,129,303 | 6  | 0 | 0  | no  | TE |

|                |   |            |            |    |   |    |     |    |
|----------------|---|------------|------------|----|---|----|-----|----|
| at_locus.05034 | 3 | 13,130,829 | 13,130,998 | 0  | 0 | 7  | yes | TE |
| at_locus.05035 | 3 | 13,132,463 | 13,132,653 | 8  | 0 | 1  | no  | TE |
| at_locus.05036 | 3 | 13,141,602 | 13,141,735 | 2  | 0 | 0  | no  |    |
| at_locus.05037 | 3 | 13,156,159 | 13,156,512 | 3  | 2 | 6  | yes |    |
| at_locus.05038 | 3 | 13,171,909 | 13,172,929 | 61 | 3 | 15 | no  | TE |
| at_locus.05039 | 3 | 13,176,972 | 13,177,090 | 4  | 0 | 2  | no  | TE |
| at_locus.05040 | 3 | 13,177,557 | 13,177,664 | 5  | 0 | 0  | no  | TE |
| at_locus.05041 | 3 | 13,177,989 | 13,178,022 | 5  | 0 | 3  | no  | TE |
| at_locus.05042 | 3 | 13,189,644 | 13,189,847 | 5  | 0 | 0  | no  | TE |
| at_locus.05043 | 3 | 13,190,102 | 13,190,695 | 18 | 0 | 4  | no  | TE |
| at_locus.05044 | 3 | 13,191,161 | 13,191,548 | 4  | 0 | 4  | no  | TE |
| at_locus.05045 | 3 | 13,192,007 | 13,192,426 | 0  | 0 | 4  | no  | TE |
| at_locus.05046 | 3 | 13,192,608 | 13,192,902 | 4  | 0 | 1  | no  | TE |
| at_locus.05047 | 3 | 13,195,796 | 13,196,084 | 5  | 0 | 4  | no  | TE |
| at_locus.05048 | 3 | 13,196,691 | 13,197,392 | 22 | 0 | 7  | no  | TE |
| at_locus.05049 | 3 | 13,198,883 | 13,199,834 | 7  | 0 | 11 | no  | TE |
| at_locus.05050 | 3 | 13,249,309 | 13,249,566 | 8  | 0 | 3  | no  | TE |
| at_locus.05051 | 3 | 13,264,234 | 13,264,616 | 1  | 0 | 6  | no  | TE |
| at_locus.05052 | 3 | 13,264,759 | 13,265,457 | 12 | 0 | 5  | no  | TE |
| at_locus.05053 | 3 | 13,319,106 | 13,319,215 | 4  | 0 | 0  | no  |    |
| at_locus.05054 | 3 | 13,331,147 | 13,331,618 | 29 | 1 | 0  | no  | TE |
| at_locus.05055 | 3 | 13,331,858 | 13,332,293 | 15 | 1 | 0  | no  | TE |
| at_locus.05056 | 3 | 13,337,346 | 13,338,125 | 10 | 0 | 6  | no  | TE |
| at_locus.05057 | 3 | 13,341,808 | 13,342,240 | 7  | 0 | 0  | no  | TE |
| at_locus.05058 | 3 | 13,346,004 | 13,346,684 | 10 | 2 | 4  | no  | TE |
| at_locus.05059 | 3 | 13,347,749 | 13,348,483 | 4  | 0 | 18 | no  | TE |
| at_locus.05060 | 3 | 13,348,542 | 13,349,223 | 10 | 0 | 5  | no  | TE |
| at_locus.05061 | 3 | 13,351,350 | 13,352,003 | 10 | 0 | 8  | no  | TE |
| at_locus.05062 | 3 | 13,352,357 | 13,352,765 | 0  | 1 | 6  | no  | TE |
| at_locus.05063 | 3 | 13,352,971 | 13,353,801 | 2  | 0 | 11 | no  | TE |
| at_locus.05064 | 3 | 13,355,170 | 13,355,795 | 5  | 0 | 7  | no  | TE |
| at_locus.05065 | 3 | 13,355,940 | 13,356,088 | 4  | 0 | 3  | no  | TE |
| at_locus.05066 | 3 | 13,356,363 | 13,356,494 | 5  | 0 | 3  | no  | TE |
| at_locus.05067 | 3 | 13,356,759 | 13,356,881 | 4  | 0 | 2  | no  | TE |
| at_locus.05068 | 3 | 13,357,590 | 13,357,980 | 4  | 0 | 4  | no  | TE |
| at_locus.05069 | 3 | 13,358,043 | 13,358,249 | 0  | 0 | 6  | no  | TE |
| at_locus.05070 | 3 | 13,358,648 | 13,358,980 | 9  | 0 | 9  | no  | TE |

|                |   |            |            |    |   |    |     |    |
|----------------|---|------------|------------|----|---|----|-----|----|
| at_locus.05071 | 3 | 13,359,169 | 13,359,621 | 1  | 0 | 13 | no  | TE |
| at_locus.05072 | 3 | 13,359,776 | 13,360,179 | 29 | 1 | 1  | no  | TE |
| at_locus.05073 | 3 | 13,372,981 | 13,373,191 | 34 | 0 | 0  | no  | TE |
| at_locus.05074 | 3 | 13,373,539 | 13,374,080 | 4  | 0 | 8  | no  | TE |
| at_locus.05075 | 3 | 13,375,126 | 13,375,278 | 4  | 0 | 0  | no  | TE |
| at_locus.05076 | 3 | 13,377,331 | 13,377,684 | 44 | 0 | 1  | no  | TE |
| at_locus.05077 | 3 | 13,382,477 | 13,383,480 | 10 | 3 | 18 | no  | TE |
| at_locus.05078 | 3 | 13,401,954 | 13,402,431 | 7  | 0 | 2  | no  | TE |
| at_locus.05079 | 3 | 13,404,601 | 13,404,624 | 5  | 0 | 0  | no  | TE |
| at_locus.05080 | 3 | 13,405,029 | 13,405,430 | 2  | 0 | 5  | no  | TE |
| at_locus.05081 | 3 | 13,406,591 | 13,406,615 | 4  | 0 | 0  | no  | TE |
| at_locus.05082 | 3 | 13,406,915 | 13,410,402 | 65 | 4 | 91 | yes | TE |
| at_locus.05083 | 3 | 13,411,568 | 13,411,961 | 6  | 0 | 4  | no  | TE |
| at_locus.05084 | 3 | 13,412,024 | 13,412,112 | 0  | 0 | 4  | no  | TE |
| at_locus.05085 | 3 | 13,412,460 | 13,412,996 | 13 | 0 | 7  | no  | TE |
| at_locus.05086 | 3 | 13,413,345 | 13,413,505 | 0  | 0 | 5  | no  | TE |
| at_locus.05087 | 3 | 13,413,529 | 13,415,661 | 28 | 1 | 37 | yes | TE |
| at_locus.05088 | 3 | 13,416,496 | 13,416,774 | 0  | 0 | 5  | no  | TE |
| at_locus.05089 | 3 | 13,418,426 | 13,418,803 | 6  | 0 | 1  | yes | TE |
| at_locus.05090 | 3 | 13,420,561 | 13,420,972 | 2  | 0 | 6  | no  | TE |
| at_locus.05091 | 3 | 13,425,588 | 13,425,709 | 4  | 0 | 0  | yes | TE |
| at_locus.05092 | 3 | 13,425,917 | 13,426,177 | 5  | 0 | 5  | no  | TE |
| at_locus.05093 | 3 | 13,430,710 | 13,430,824 | 4  | 0 | 0  | no  | TE |
| at_locus.05094 | 3 | 13,466,087 | 13,466,110 | 5  | 0 | 0  | no  | TE |
| at_locus.05095 | 3 | 13,477,769 | 13,477,999 | 3  | 0 | 3  | no  | TE |
| at_locus.05096 | 3 | 13,478,536 | 13,479,090 | 5  | 0 | 4  | yes | TE |
| at_locus.05097 | 3 | 13,479,437 | 13,479,950 | 6  | 0 | 1  | no  | TE |
| at_locus.05098 | 3 | 13,480,457 | 13,480,755 | 2  | 0 | 10 | no  | TE |
| at_locus.05099 | 3 | 13,480,925 | 13,481,532 | 9  | 0 | 17 | yes | TE |
| at_locus.05100 | 3 | 13,481,772 | 13,483,241 | 14 | 0 | 32 | yes | TE |
| at_locus.05101 | 3 | 13,483,456 | 13,483,831 | 45 | 2 | 8  | no  | TE |
| at_locus.05102 | 3 | 13,484,769 | 13,485,090 | 2  | 0 | 6  | yes |    |
| at_locus.05103 | 3 | 13,519,652 | 13,520,591 | 15 | 4 | 18 | no  | TE |
| at_locus.05104 | 3 | 13,520,860 | 13,521,030 | 0  | 0 | 5  | no  | TE |
| at_locus.05105 | 3 | 13,521,295 | 13,521,488 | 11 | 0 | 8  | no  | TE |
| at_locus.05106 | 3 | 13,521,960 | 13,523,611 | 31 | 1 | 43 | no  | TE |
| at_locus.05107 | 3 | 13,525,378 | 13,525,650 | 11 | 0 | 7  | no  | TE |



|                |   |            |            |     |     |     |     |    |
|----------------|---|------------|------------|-----|-----|-----|-----|----|
| at_locus.05108 | 3 | 13,526,175 | 13,526,421 | 7   | 0   | 2   | no  | TE |
| at_locus.05109 | 3 | 13,536,523 | 13,536,633 | 29  | 3   | 2   | no  |    |
| at_locus.05110 | 3 | 13,540,293 | 13,540,344 | 10  | 8   | 4   | no  |    |
| at_locus.05111 | 3 | 13,541,558 | 13,541,612 | 0   | 13  | 1   | no  |    |
| at_locus.05112 | 3 | 13,548,522 | 13,548,916 | 0   | 0   | 6   | yes | TE |
| at_locus.05113 | 3 | 13,553,436 | 13,553,870 | 5   | 0   | 2   | no  | TE |
| at_locus.05114 | 3 | 13,575,251 | 13,575,284 | 5   | 0   | 0   | no  | TE |
| at_locus.05115 | 3 | 13,590,062 | 13,590,122 | 8   | 0   | 2   | no  | TE |
| at_locus.05116 | 3 | 13,590,352 | 13,591,495 | 40  | 3   | 81  | yes | TE |
| at_locus.05117 | 3 | 13,592,504 | 13,600,058 | 170 | 147 | 233 | yes | TE |
| at_locus.05118 | 3 | 13,600,260 | 13,605,228 | 108 | 124 | 138 | yes | TE |
| at_locus.05119 | 3 | 13,605,257 | 13,606,489 | 13  | 1   | 22  | no  | TE |
| at_locus.05120 | 3 | 13,607,900 | 13,607,930 | 2   | 0   | 4   | no  | TE |
| at_locus.05121 | 3 | 13,608,477 | 13,609,275 | 13  | 0   | 12  | no  | TE |
| at_locus.05122 | 3 | 13,609,483 | 13,610,701 | 16  | 0   | 26  | yes | TE |
| at_locus.05123 | 3 | 13,610,893 | 13,613,026 | 35  | 4   | 52  | yes | TE |
| at_locus.05124 | 3 | 13,616,627 | 13,616,847 | 11  | 0   | 7   | yes | TE |
| at_locus.05125 | 3 | 13,617,289 | 13,617,505 | 7   | 0   | 8   | no  | TE |
| at_locus.05126 | 3 | 13,618,321 | 13,618,822 | 2   | 0   | 6   | yes | TE |
| at_locus.05127 | 3 | 13,621,822 | 13,622,195 | 4   | 0   | 0   | no  | TE |
| at_locus.05128 | 3 | 13,622,714 | 13,624,036 | 10  | 1   | 19  | no  | TE |
| at_locus.05129 | 3 | 13,624,280 | 13,624,778 | 4   | 0   | 12  | yes | TE |
| at_locus.05130 | 3 | 13,624,902 | 13,625,526 | 15  | 0   | 11  | yes | TE |
| at_locus.05131 | 3 | 13,625,829 | 13,626,390 | 8   | 0   | 9   | no  | TE |
| at_locus.05132 | 3 | 13,626,781 | 13,627,083 | 5   | 0   | 0   | no  | TE |
| at_locus.05133 | 3 | 13,627,271 | 13,628,144 | 16  | 0   | 23  | no  | TE |
| at_locus.05134 | 3 | 13,630,733 | 13,630,823 | 1   | 0   | 4   | no  | TE |
| at_locus.05135 | 3 | 13,632,046 | 13,633,106 | 21  | 0   | 14  | yes | TE |
| at_locus.05136 | 3 | 13,633,378 | 13,633,847 | 11  | 0   | 12  | no  | TE |
| at_locus.05137 | 3 | 13,634,112 | 13,634,381 | 0   | 0   | 5   | no  | TE |
| at_locus.05138 | 3 | 13,634,634 | 13,635,307 | 10  | 0   | 10  | yes | TE |
| at_locus.05139 | 3 | 13,635,573 | 13,637,151 | 22  | 0   | 27  | yes | TE |
| at_locus.05140 | 3 | 13,637,440 | 13,637,465 | 6   | 0   | 1   | yes | TE |
| at_locus.05141 | 3 | 13,638,020 | 13,638,286 | 5   | 0   | 0   | yes | TE |
| at_locus.05142 | 3 | 13,638,622 | 13,638,873 | 4   | 0   | 7   | no  | TE |
| at_locus.05143 | 3 | 13,639,505 | 13,639,836 | 5   | 0   | 5   | no  | TE |
| at_locus.05144 | 3 | 13,640,196 | 13,640,225 | 0   | 0   | 4   | no  | TE |

|                |   |            |            |     |     |     |     |    |
|----------------|---|------------|------------|-----|-----|-----|-----|----|
| at_locus.05145 | 3 | 13,640,402 | 13,640,726 | 6   | 1   | 1   | no  | TE |
| at_locus.05146 | 3 | 13,642,066 | 13,643,180 | 16  | 4   | 18  | no  | TE |
| at_locus.05147 | 3 | 13,643,423 | 13,643,562 | 4   | 0   | 2   | no  | TE |
| at_locus.05148 | 3 | 13,644,564 | 13,645,349 | 8   | 2   | 11  | no  | TE |
| at_locus.05149 | 3 | 13,645,556 | 13,646,003 | 6   | 0   | 8   | no  | TE |
| at_locus.05150 | 3 | 13,646,600 | 13,647,140 | 10  | 0   | 10  | no  | TE |
| at_locus.05151 | 3 | 13,647,359 | 13,649,485 | 44  | 0   | 51  | yes | TE |
| at_locus.05152 | 3 | 13,651,319 | 13,651,823 | 11  | 0   | 19  | no  | TE |
| at_locus.05153 | 3 | 13,652,142 | 13,652,766 | 12  | 0   | 9   | yes | TE |
| at_locus.05154 | 3 | 13,653,346 | 13,655,979 | 47  | 0   | 41  | yes | TE |
| at_locus.05155 | 3 | 13,656,206 | 13,656,397 | 14  | 0   | 15  | no  | TE |
| at_locus.05156 | 3 | 13,656,606 | 13,656,874 | 5   | 0   | 6   | no  | TE |
| at_locus.05157 | 3 | 13,657,143 | 13,657,241 | 3   | 0   | 6   | no  | TE |
| at_locus.05158 | 3 | 13,657,543 | 13,659,951 | 34  | 2   | 33  | yes | TE |
| at_locus.05159 | 3 | 13,660,291 | 13,660,889 | 8   | 2   | 11  | no  | TE |
| at_locus.05160 | 3 | 13,661,319 | 13,662,268 | 11  | 1   | 10  | yes | TE |
| at_locus.05161 | 3 | 13,662,554 | 13,663,456 | 19  | 0   | 26  | yes | TE |
| at_locus.05162 | 3 | 13,665,756 | 13,666,253 | 1   | 0   | 5   | yes | TE |
| at_locus.05163 | 3 | 13,666,591 | 13,667,465 | 16  | 0   | 22  | no  | TE |
| at_locus.05164 | 3 | 13,672,976 | 13,673,348 | 0   | 0   | 2   | no  | TE |
| at_locus.05165 | 3 | 13,674,097 | 13,674,900 | 3   | 1   | 9   | no  | TE |
| at_locus.05166 | 3 | 13,676,604 | 13,676,990 | 1   | 0   | 4   | yes | TE |
| at_locus.05167 | 3 | 13,677,481 | 13,678,442 | 52  | 23  | 36  | yes | TE |
| at_locus.05168 | 3 | 13,684,255 | 13,684,656 | 11  | 0   | 11  | no  | TE |
| at_locus.05169 | 3 | 13,684,924 | 13,685,073 | 12  | 0   | 10  | no  | TE |
| at_locus.05170 | 3 | 13,685,541 | 13,687,532 | 108 | 67  | 57  | no  |    |
| at_locus.05171 | 3 | 13,687,770 | 13,690,204 | 115 | 82  | 65  | no  |    |
| at_locus.05172 | 3 | 13,690,431 | 13,695,157 | 103 | 71  | 56  | no  |    |
| at_locus.05173 | 3 | 13,695,351 | 13,700,562 | 101 | 72  | 60  | no  |    |
| at_locus.05174 | 3 | 13,700,739 | 13,719,441 | 177 | 150 | 151 | yes |    |
| at_locus.05175 | 3 | 13,719,663 | 13,739,495 | 157 | 137 | 125 | no  |    |
| at_locus.05176 | 3 | 13,739,795 | 13,741,786 | 108 | 67  | 57  | no  |    |
| at_locus.05177 | 3 | 13,742,254 | 13,742,403 | 12  | 0   | 10  | no  | TE |
| at_locus.05178 | 3 | 13,742,671 | 13,743,072 | 11  | 0   | 11  | no  | TE |
| at_locus.05179 | 3 | 13,748,187 | 13,748,709 | 0   | 11  | 0   | yes |    |
| at_locus.05180 | 3 | 13,748,902 | 13,754,046 | 133 | 132 | 102 | no  |    |
| at_locus.05181 | 3 | 13,760,577 | 13,765,123 | 156 | 149 | 151 | no  |    |

|                |   |            |            |     |     |     |     |    |
|----------------|---|------------|------------|-----|-----|-----|-----|----|
| at_locus.05182 | 3 | 13,765,193 | 13,767,895 | 86  | 91  | 96  | no  |    |
| at_locus.05183 | 3 | 13,768,133 | 13,788,798 | 149 | 135 | 126 | no  |    |
| at_locus.05184 | 3 | 13,788,949 | 13,808,724 | 162 | 151 | 162 | yes |    |
| at_locus.05185 | 3 | 13,808,794 | 13,810,316 | 77  | 74  | 84  | no  |    |
| at_locus.05186 | 3 | 13,811,512 | 13,812,254 | 33  | 22  | 38  | no  | TE |
| at_locus.05187 | 3 | 13,812,610 | 13,813,433 | 8   | 0   | 4   | no  | TE |
| at_locus.05188 | 3 | 13,813,697 | 13,814,036 | 3   | 0   | 5   | no  | TE |
| at_locus.05189 | 3 | 13,814,310 | 13,814,521 | 0   | 0   | 5   | no  | TE |
| at_locus.05190 | 3 | 13,818,996 | 13,819,772 | 6   | 0   | 7   | no  | TE |
| at_locus.05191 | 3 | 13,820,186 | 13,821,853 | 118 | 111 | 126 | yes | TE |
| at_locus.05192 | 3 | 13,822,081 | 13,823,759 | 61  | 50  | 58  | yes |    |
| at_locus.05193 | 3 | 13,823,978 | 13,827,412 | 130 | 122 | 115 | yes |    |
| at_locus.05194 | 3 | 13,827,993 | 13,828,249 | 4   | 0   | 2   | no  | TE |
| at_locus.05195 | 3 | 13,832,321 | 13,832,606 | 4   | 0   | 3   | no  | TE |
| at_locus.05196 | 3 | 13,833,756 | 13,834,609 | 22  | 1   | 11  | no  | TE |
| at_locus.05197 | 3 | 13,839,528 | 13,839,739 | 0   | 0   | 5   | no  | TE |
| at_locus.05198 | 3 | 13,840,860 | 13,841,475 | 7   | 0   | 8   | yes | TE |
| at_locus.05199 | 3 | 13,844,321 | 13,844,825 | 12  | 0   | 4   | no  | TE |
| at_locus.05200 | 3 | 13,845,217 | 13,845,611 | 2   | 0   | 7   | no  | TE |
| at_locus.05201 | 3 | 13,845,821 | 13,852,012 | 171 | 148 | 154 | yes | TE |
| at_locus.05202 | 3 | 13,854,380 | 13,857,940 | 100 | 121 | 110 | no  |    |
| at_locus.05203 | 3 | 13,858,035 | 13,859,305 | 85  | 86  | 99  | no  |    |
| at_locus.05204 | 3 | 13,859,578 | 13,881,680 | 162 | 142 | 157 | no  |    |
| at_locus.05205 | 3 | 13,913,149 | 13,914,822 | 23  | 1   | 28  | yes | TE |
| at_locus.05206 | 3 | 13,915,182 | 13,916,271 | 20  | 1   | 11  | no  | TE |
| at_locus.05207 | 3 | 13,916,707 | 13,916,815 | 5   | 0   | 0   | no  | TE |
| at_locus.05208 | 3 | 13,917,187 | 13,917,576 | 3   | 0   | 4   | no  | TE |
| at_locus.05209 | 3 | 13,918,759 | 13,918,975 | 8   | 0   | 2   | yes | TE |
| at_locus.05210 | 3 | 13,919,408 | 13,919,789 | 9   | 0   | 10  | no  | TE |
| at_locus.05211 | 3 | 13,920,185 | 13,920,374 | 0   | 0   | 4   | yes | TE |
| at_locus.05212 | 3 | 13,921,303 | 13,921,577 | 5   | 0   | 9   | yes | TE |
| at_locus.05213 | 3 | 13,921,907 | 13,922,072 | 7   | 0   | 4   | no  | TE |
| at_locus.05214 | 3 | 13,922,637 | 13,923,327 | 8   | 0   | 12  | no  | TE |
| at_locus.05215 | 3 | 13,923,586 | 13,923,895 | 9   | 0   | 10  | no  | TE |
| at_locus.05216 | 3 | 13,924,325 | 13,926,586 | 35  | 0   | 35  | no  | TE |
| at_locus.05217 | 3 | 13,937,352 | 13,938,285 | 8   | 0   | 10  | yes | TE |
| at_locus.05218 | 3 | 13,946,804 | 13,946,874 | 5   | 0   | 0   | yes | TE |

|                |   |            |            |    |   |    |     |    |
|----------------|---|------------|------------|----|---|----|-----|----|
| at_locus.05219 | 3 | 13,951,623 | 13,951,702 | 0  | 0 | 5  | no  | TE |
| at_locus.05220 | 3 | 13,957,976 | 13,957,998 | 0  | 0 | 4  | no  | TE |
| at_locus.05221 | 3 | 13,977,661 | 13,977,907 | 4  | 0 | 7  | yes | TE |
| at_locus.05222 | 3 | 13,978,242 | 13,978,565 | 5  | 0 | 6  | no  | TE |
| at_locus.05223 | 3 | 13,983,013 | 13,983,281 | 1  | 0 | 7  | no  | TE |
| at_locus.05224 | 3 | 13,983,489 | 13,983,550 | 4  | 0 | 6  | no  | TE |
| at_locus.05225 | 3 | 13,984,116 | 13,984,648 | 5  | 0 | 6  | no  | TE |
| at_locus.05226 | 3 | 13,996,859 | 13,997,334 | 4  | 0 | 1  | no  | TE |
| at_locus.05227 | 3 | 13,998,128 | 13,998,545 | 4  | 0 | 1  | yes | TE |
| at_locus.05228 | 3 | 13,999,415 | 13,999,481 | 0  | 0 | 4  | no  |    |
| at_locus.05229 | 3 | 14,001,960 | 14,002,071 | 0  | 0 | 6  | no  |    |
| at_locus.05230 | 3 | 14,004,393 | 14,004,433 | 3  | 0 | 4  | no  | TE |
| at_locus.05231 | 3 | 14,004,680 | 14,005,520 | 19 | 0 | 8  | no  | TE |
| at_locus.05232 | 3 | 14,005,869 | 14,006,400 | 7  | 1 | 7  | no  | TE |
| at_locus.05233 | 3 | 14,006,706 | 14,007,150 | 9  | 0 | 4  | no  | TE |
| at_locus.05234 | 3 | 14,007,363 | 14,008,177 | 11 | 0 | 23 | yes | TE |
| at_locus.05235 | 3 | 14,011,264 | 14,011,970 | 15 | 0 | 7  | no  | TE |
| at_locus.05236 | 3 | 14,012,260 | 14,012,392 | 6  | 0 | 4  | no  | TE |
| at_locus.05237 | 3 | 14,012,488 | 14,012,777 | 5  | 0 | 4  | no  | TE |
| at_locus.05238 | 3 | 14,016,006 | 14,016,215 | 0  | 0 | 4  | yes | TE |
| at_locus.05239 | 3 | 14,016,768 | 14,016,910 | 8  | 0 | 0  | no  | TE |
| at_locus.05240 | 3 | 14,017,216 | 14,017,269 | 0  | 0 | 4  | no  | TE |
| at_locus.05241 | 3 | 14,019,577 | 14,019,776 | 5  | 0 | 0  | yes |    |
| at_locus.05242 | 3 | 14,026,287 | 14,026,398 | 4  | 0 | 2  | no  | TE |
| at_locus.05243 | 3 | 14,030,097 | 14,030,352 | 5  | 0 | 2  | no  | TE |
| at_locus.05244 | 3 | 14,030,425 | 14,030,768 | 5  | 0 | 4  | no  | TE |
| at_locus.05245 | 3 | 14,033,845 | 14,034,216 | 11 | 0 | 1  | no  | TE |
| at_locus.05246 | 3 | 14,038,091 | 14,038,349 | 1  | 0 | 5  | no  | TE |
| at_locus.05247 | 3 | 14,038,717 | 14,040,066 | 12 | 1 | 17 | no  | TE |
| at_locus.05248 | 3 | 14,052,378 | 14,052,960 | 6  | 0 | 2  | no  | TE |
| at_locus.05249 | 3 | 14,053,195 | 14,053,731 | 16 | 1 | 3  | no  | TE |
| at_locus.05250 | 3 | 14,063,323 | 14,063,497 | 1  | 0 | 7  | yes | TE |
| at_locus.05251 | 3 | 14,063,942 | 14,063,976 | 4  | 1 | 1  | yes | TE |
| at_locus.05252 | 3 | 14,065,619 | 14,065,865 | 0  | 0 | 4  | no  | TE |
| at_locus.05253 | 3 | 14,066,297 | 14,066,760 | 4  | 0 | 10 | yes | TE |
| at_locus.05254 | 3 | 14,067,569 | 14,067,936 | 1  | 0 | 7  | yes | TE |
| at_locus.05255 | 3 | 14,068,157 | 14,068,575 | 49 | 0 | 0  | no  | TE |

|                |   |            |            |      |       |      |     |    |
|----------------|---|------------|------------|------|-------|------|-----|----|
| at_locus.05256 | 3 | 14,068,762 | 14,069,179 | 2    | 0     | 12   | yes | TE |
| at_locus.05257 | 3 | 14,075,654 | 14,075,792 | 4    | 0     | 1    | no  | TE |
| at_locus.05258 | 3 | 14,077,346 | 14,077,465 | 2    | 0     | 5    | no  | TE |
| at_locus.05259 | 3 | 14,084,224 | 14,084,709 | 14   | 0     | 7    | no  | TE |
| at_locus.05260 | 3 | 14,088,087 | 14,088,367 | 3    | 0     | 4    | no  | TE |
| at_locus.05261 | 3 | 14,090,625 | 14,090,787 | 0    | 0     | 5    | no  | TE |
| at_locus.05262 | 3 | 14,091,394 | 14,091,897 | 9    | 0     | 10   | no  | TE |
| at_locus.05263 | 3 | 14,095,491 | 14,095,534 | 11   | 0     | 1    | yes | TE |
| at_locus.05264 | 3 | 14,107,051 | 14,107,249 | 7    | 0     | 0    | no  | TE |
| at_locus.05265 | 3 | 14,109,470 | 14,111,341 | 41   | 0     | 37   | no  | TE |
| at_locus.05266 | 3 | 14,126,328 | 14,126,673 | 7    | 0     | 4    | no  | TE |
| at_locus.05267 | 3 | 14,129,793 | 14,130,373 | 8    | 0     | 3    | no  | TE |
| at_locus.05268 | 3 | 14,136,890 | 14,136,913 | 6    | 0     | 0    | yes | TE |
| at_locus.05269 | 3 | 14,138,401 | 14,138,483 | 12   | 0     | 0    | no  | TE |
| at_locus.05270 | 3 | 14,139,821 | 14,142,632 | 36   | 1     | 46   | no  | TE |
| at_locus.05271 | 3 | 14,142,790 | 14,142,926 | 12   | 0     | 4    | no  | TE |
| at_locus.05272 | 3 | 14,149,305 | 14,149,427 | 5    | 0     | 1    | no  | TE |
| at_locus.05273 | 3 | 14,151,895 | 14,152,475 | 8    | 0     | 3    | no  | TE |
| at_locus.05274 | 3 | 14,153,990 | 14,154,072 | 12   | 0     | 0    | no  | TE |
| at_locus.05275 | 3 | 14,155,410 | 14,158,221 | 36   | 1     | 46   | no  | TE |
| at_locus.05276 | 3 | 14,158,379 | 14,159,240 | 18   | 0     | 8    | no  | TE |
| at_locus.05277 | 3 | 14,160,963 | 14,161,068 | 7    | 0     | 2    | no  | TE |
| at_locus.05278 | 3 | 14,161,546 | 14,161,882 | 6    | 0     | 5    | no  | TE |
| at_locus.05279 | 3 | 14,163,304 | 14,163,586 | 2    | 0     | 8    | yes | TE |
| at_locus.05280 | 3 | 14,163,919 | 14,164,592 | 6    | 0     | 11   | yes | TE |
| at_locus.05281 | 3 | 14,164,879 | 14,165,301 | 5    | 0     | 9    | no  | TE |
| at_locus.05282 | 3 | 14,165,512 | 14,165,891 | 12   | 0     | 13   | no  | TE |
| at_locus.05283 | 3 | 14,166,322 | 14,166,929 | 2    | 1     | 5    | no  | TE |
| at_locus.05284 | 3 | 14,167,244 | 14,168,442 | 15   | 1     | 27   | no  | TE |
| at_locus.05285 | 3 | 14,177,280 | 14,177,586 | 4    | 0     | 3    | yes | TE |
| at_locus.05286 | 3 | 14,183,236 | 14,184,529 | 126  | 132   | 127  | no  |    |
| at_locus.05287 | 3 | 14,184,873 | 14,190,201 | 148  | 143   | 146  | no  |    |
| at_locus.05288 | 3 | 14,190,444 | 14,194,157 | 152  | 144   | 147  | no  |    |
| at_locus.05289 | 3 | 14,194,400 | 14,217,308 | 6238 | 18051 | 7211 | yes |    |
| at_locus.05290 | 3 | 14,217,524 | 14,219,913 | 103  | 88    | 90   | yes |    |
| at_locus.05291 | 3 | 14,220,940 | 14,222,785 | 134  | 135   | 128  | no  |    |
| at_locus.05292 | 3 | 14,223,011 | 14,224,308 | 144  | 132   | 139  | no  |    |

|                |   |            |            |     |     |     |     |    |
|----------------|---|------------|------------|-----|-----|-----|-----|----|
| at_locus.05293 | 3 | 14,224,534 | 14,236,380 | 180 | 153 | 166 | yes |    |
| at_locus.05294 | 3 | 14,256,632 | 14,256,775 | 0   | 0   | 5   | yes |    |
| at_locus.05295 | 3 | 14,276,815 | 14,277,467 | 8   | 0   | 15  | no  | TE |
| at_locus.05296 | 3 | 14,283,657 | 14,283,923 | 10  | 0   | 1   | yes | TE |
| at_locus.05297 | 3 | 14,296,383 | 14,296,416 | 4   | 0   | 0   | no  | TE |
| at_locus.05298 | 3 | 14,308,577 | 14,309,422 | 2   | 0   | 18  | yes | TE |
| at_locus.05299 | 3 | 14,309,710 | 14,310,588 | 22  | 0   | 18  | yes | TE |
| at_locus.05300 | 3 | 14,311,315 | 14,311,517 | 4   | 0   | 7   | no  | TE |
| at_locus.05301 | 3 | 14,315,801 | 14,316,952 | 25  | 2   | 25  | yes | TE |
| at_locus.05302 | 3 | 14,317,197 | 14,317,329 | 4   | 0   | 0   | no  | TE |
| at_locus.05303 | 3 | 14,326,066 | 14,326,860 | 41  | 1   | 48  | yes |    |
| at_locus.05304 | 3 | 14,327,341 | 14,328,016 | 111 | 1   | 23  | yes |    |
| at_locus.05305 | 3 | 14,329,681 | 14,329,846 | 6   | 0   | 0   | yes |    |
| at_locus.05306 | 3 | 14,340,491 | 14,340,538 | 5   | 0   | 0   | no  |    |
| at_locus.05307 | 3 | 14,348,980 | 14,349,002 | 0   | 0   | 4   | no  | TE |
| at_locus.05308 | 3 | 14,354,246 | 14,354,429 | 4   | 0   | 0   | yes | TE |
| at_locus.05309 | 3 | 14,362,187 | 14,362,221 | 7   | 0   | 5   | no  | TE |
| at_locus.05310 | 3 | 14,371,609 | 14,371,632 | 5   | 0   | 0   | no  |    |
| at_locus.05311 | 3 | 14,375,238 | 14,375,268 | 5   | 0   | 0   | no  |    |
| at_locus.05312 | 3 | 14,395,262 | 14,395,347 | 0   | 0   | 7   | yes |    |
| at_locus.05313 | 3 | 14,401,034 | 14,401,842 | 7   | 0   | 14  | no  | TE |
| at_locus.05314 | 3 | 14,402,057 | 14,402,356 | 0   | 0   | 4   | no  | TE |
| at_locus.05315 | 3 | 14,403,445 | 14,403,567 | 4   | 0   | 1   | no  | TE |
| at_locus.05316 | 3 | 14,406,656 | 14,407,542 | 11  | 0   | 7   | yes | TE |
| at_locus.05317 | 3 | 14,408,242 | 14,408,346 | 8   | 1   | 1   | yes |    |
| at_locus.05318 | 3 | 14,417,017 | 14,417,522 | 7   | 0   | 12  | no  | TE |
| at_locus.05319 | 3 | 14,417,712 | 14,418,031 | 7   | 3   | 4   | yes | TE |
| at_locus.05320 | 3 | 14,418,060 | 14,418,345 | 0   | 0   | 5   | yes | TE |
| at_locus.05321 | 3 | 14,419,047 | 14,419,245 | 4   | 0   | 5   | no  | TE |
| at_locus.05322 | 3 | 14,419,515 | 14,419,919 | 9   | 0   | 5   | yes | TE |
| at_locus.05323 | 3 | 14,420,416 | 14,424,900 | 122 | 3   | 112 | yes | TE |
| at_locus.05324 | 3 | 14,425,328 | 14,427,453 | 37  | 5   | 45  | no  | TE |
| at_locus.05325 | 3 | 14,431,219 | 14,431,936 | 14  | 4   | 12  | no  | TE |
| at_locus.05326 | 3 | 14,432,330 | 14,432,390 | 3   | 0   | 4   | no  | TE |
| at_locus.05327 | 3 | 14,432,853 | 14,433,334 | 1   | 0   | 8   | no  | TE |
| at_locus.05328 | 3 | 14,433,574 | 14,435,849 | 34  | 2   | 35  | yes | TE |
| at_locus.05329 | 3 | 14,437,049 | 14,437,356 | 6   | 0   | 4   | no  | TE |

|                |   |            |            |    |   |    |     |    |
|----------------|---|------------|------------|----|---|----|-----|----|
| at_locus.05330 | 3 | 14,438,123 | 14,438,930 | 7  | 0 | 4  | yes | TE |
| at_locus.05331 | 3 | 14,444,308 | 14,445,141 | 23 | 0 | 5  | no  | TE |
| at_locus.05332 | 3 | 14,445,231 | 14,445,531 | 1  | 0 | 5  | no  | TE |
| at_locus.05333 | 3 | 14,446,971 | 14,447,509 | 20 | 0 | 8  | no  | TE |
| at_locus.05334 | 3 | 14,449,857 | 14,450,027 | 0  | 0 | 4  | yes | TE |
| at_locus.05335 | 3 | 14,451,616 | 14,452,076 | 14 | 0 | 7  | no  | TE |
| at_locus.05336 | 3 | 14,455,719 | 14,456,283 | 9  | 0 | 6  | yes | TE |
| at_locus.05337 | 3 | 14,456,417 | 14,456,704 | 0  | 0 | 5  | no  | TE |
| at_locus.05338 | 3 | 14,460,412 | 14,460,574 | 31 | 2 | 5  | no  | TE |
| at_locus.05339 | 3 | 14,462,042 | 14,462,385 | 2  | 0 | 5  | yes | TE |
| at_locus.05340 | 3 | 14,462,763 | 14,462,962 | 4  | 0 | 0  | no  | TE |
| at_locus.05341 | 3 | 14,469,583 | 14,469,679 | 4  | 0 | 3  | no  | TE |
| at_locus.05342 | 3 | 14,469,987 | 14,470,269 | 4  | 0 | 0  | yes | TE |
| at_locus.05343 | 3 | 14,470,761 | 14,470,928 | 3  | 0 | 4  | yes |    |
| at_locus.05344 | 3 | 14,471,878 | 14,472,098 | 11 | 0 | 2  | no  | TE |
| at_locus.05345 | 3 | 14,472,327 | 14,472,722 | 20 | 1 | 10 | yes | TE |
| at_locus.05346 | 3 | 14,474,404 | 14,474,751 | 21 | 0 | 5  | yes | TE |
| at_locus.05347 | 3 | 14,475,138 | 14,475,170 | 0  | 0 | 6  | no  | TE |
| at_locus.05348 | 3 | 14,476,162 | 14,476,649 | 4  | 0 | 17 | yes | TE |
| at_locus.05349 | 3 | 14,477,219 | 14,478,135 | 4  | 0 | 12 | no  | TE |
| at_locus.05350 | 3 | 14,478,416 | 14,478,760 | 8  | 0 | 3  | no  | TE |
| at_locus.05351 | 3 | 14,494,890 | 14,495,898 | 3  | 0 | 13 | no  | TE |
| at_locus.05352 | 3 | 14,496,433 | 14,496,590 | 5  | 0 | 4  | no  | TE |
| at_locus.05353 | 3 | 14,499,984 | 14,500,477 | 5  | 0 | 1  | no  | TE |
| at_locus.05354 | 3 | 14,503,271 | 14,503,478 | 1  | 0 | 5  | yes | TE |
| at_locus.05355 | 3 | 14,554,111 | 14,554,235 | 4  | 0 | 0  | no  | TE |
| at_locus.05356 | 3 | 14,556,562 | 14,556,899 | 2  | 0 | 6  | no  | TE |
| at_locus.05357 | 3 | 14,558,659 | 14,558,953 | 4  | 0 | 7  | no  | TE |
| at_locus.05358 | 3 | 14,559,927 | 14,560,363 | 4  | 0 | 7  | no  | TE |
| at_locus.05359 | 3 | 14,560,800 | 14,561,215 | 5  | 0 | 7  | no  | TE |
| at_locus.05360 | 3 | 14,563,449 | 14,563,819 | 3  | 0 | 10 | no  | TE |
| at_locus.05361 | 3 | 14,563,980 | 14,565,010 | 12 | 0 | 11 | yes | TE |
| at_locus.05362 | 3 | 14,565,248 | 14,565,469 | 5  | 0 | 6  | no  | TE |
| at_locus.05363 | 3 | 14,565,924 | 14,566,309 | 0  | 0 | 4  | no  | TE |
| at_locus.05364 | 3 | 14,566,468 | 14,567,618 | 12 | 0 | 22 | no  | TE |
| at_locus.05365 | 3 | 14,570,072 | 14,570,814 | 26 | 0 | 1  | yes | TE |
| at_locus.05366 | 3 | 14,580,824 | 14,580,955 | 1  | 0 | 4  | yes | TE |

|                |   |            |            |     |   |     |     |    |
|----------------|---|------------|------------|-----|---|-----|-----|----|
| at_locus.05367 | 3 | 14,583,439 | 14,583,575 | 4   | 0 | 5   | no  | TE |
| at_locus.05368 | 3 | 14,588,997 | 14,589,422 | 8   | 0 | 1   | no  | TE |
| at_locus.05369 | 3 | 14,590,846 | 14,591,175 | 8   | 1 | 6   | yes | TE |
| at_locus.05370 | 3 | 14,591,709 | 14,592,357 | 11  | 0 | 10  | no  | TE |
| at_locus.05371 | 3 | 14,592,429 | 14,593,564 | 17  | 1 | 18  | yes | TE |
| at_locus.05372 | 3 | 14,625,852 | 14,625,961 | 9   | 0 | 0   | no  | TE |
| at_locus.05373 | 3 | 14,644,867 | 14,644,901 | 4   | 0 | 0   | no  | TE |
| at_locus.05374 | 3 | 14,661,493 | 14,661,982 | 9   | 1 | 27  | yes | TE |
| at_locus.05375 | 3 | 14,662,201 | 14,662,546 | 1   | 1 | 4   | yes | TE |
| at_locus.05376 | 3 | 14,663,776 | 14,664,140 | 14  | 0 | 8   | no  | TE |
| at_locus.05377 | 3 | 14,664,516 | 14,664,665 | 1   | 1 | 9   | no  |    |
| at_locus.05378 | 3 | 14,679,370 | 14,680,128 | 69  | 2 | 50  | no  |    |
| at_locus.05379 | 3 | 14,693,893 | 14,694,248 | 22  | 0 | 4   | yes |    |
| at_locus.05380 | 3 | 14,696,058 | 14,696,180 | 4   | 0 | 1   | yes | TE |
| at_locus.05381 | 3 | 14,703,256 | 14,703,378 | 8   | 0 | 0   | yes | TE |
| at_locus.05382 | 3 | 14,723,944 | 14,724,860 | 9   | 0 | 2   | no  | TE |
| at_locus.05383 | 3 | 14,727,477 | 14,727,835 | 11  | 0 | 7   | yes | TE |
| at_locus.05384 | 3 | 14,728,493 | 14,728,695 | 4   | 0 | 2   | no  | TE |
| at_locus.05385 | 3 | 14,728,853 | 14,728,982 | 0   | 0 | 7   | no  | TE |
| at_locus.05386 | 3 | 14,729,976 | 14,730,343 | 2   | 0 | 5   | no  | TE |
| at_locus.05387 | 3 | 14,730,837 | 14,731,358 | 2   | 0 | 5   | yes | TE |
| at_locus.05388 | 3 | 14,739,438 | 14,739,828 | 14  | 0 | 15  | yes |    |
| at_locus.05389 | 3 | 14,740,125 | 14,741,529 | 142 | 1 | 155 | yes | TE |
| at_locus.05390 | 3 | 14,745,217 | 14,745,541 | 23  | 0 | 25  | yes |    |
| at_locus.05391 | 3 | 14,747,549 | 14,748,695 | 23  | 0 | 5   | yes | TE |
| at_locus.05392 | 3 | 14,751,446 | 14,751,467 | 0   | 0 | 4   | no  | TE |
| at_locus.05393 | 3 | 14,756,204 | 14,756,718 | 1   | 0 | 7   | yes | TE |
| at_locus.05394 | 3 | 14,796,236 | 14,796,500 | 6   | 0 | 1   | no  |    |
| at_locus.05395 | 3 | 14,800,020 | 14,800,351 | 0   | 0 | 5   | no  | TE |
| at_locus.05396 | 3 | 14,806,081 | 14,806,497 | 5   | 0 | 1   | no  | TE |
| at_locus.05397 | 3 | 14,806,766 | 14,806,798 | 2   | 0 | 4   | no  | TE |
| at_locus.05398 | 3 | 14,807,777 | 14,807,850 | 1   | 0 | 5   | no  | TE |
| at_locus.05399 | 3 | 14,809,321 | 14,809,607 | 4   | 0 | 4   | no  | TE |
| at_locus.05400 | 3 | 14,811,301 | 14,812,853 | 17  | 0 | 13  | yes | TE |
| at_locus.05401 | 3 | 14,813,336 | 14,813,419 | 4   | 0 | 3   | no  | TE |
| at_locus.05402 | 3 | 14,813,924 | 14,814,027 | 11  | 0 | 3   | no  | TE |
| at_locus.05403 | 3 | 14,815,380 | 14,815,710 | 2   | 0 | 8   | yes | TE |



|                |   |            |            |    |   |    |     |    |
|----------------|---|------------|------------|----|---|----|-----|----|
| at_locus.05404 | 3 | 14,824,192 | 14,825,756 | 28 | 1 | 35 | yes | TE |
| at_locus.05405 | 3 | 14,825,834 | 14,827,387 | 19 | 1 | 22 | yes | TE |
| at_locus.05406 | 3 | 14,828,007 | 14,828,302 | 4  | 0 | 2  | no  | TE |
| at_locus.05407 | 3 | 14,829,449 | 14,829,660 | 0  | 0 | 4  | no  | TE |
| at_locus.05408 | 3 | 14,830,482 | 14,830,709 | 4  | 0 | 0  | yes | TE |
| at_locus.05409 | 3 | 14,830,901 | 14,831,401 | 4  | 0 | 10 | yes | TE |
| at_locus.05410 | 3 | 14,832,975 | 14,833,012 | 2  | 0 | 6  | no  | TE |
| at_locus.05411 | 3 | 14,833,567 | 14,834,171 | 15 | 0 | 8  | no  | TE |
| at_locus.05412 | 3 | 14,834,407 | 14,834,522 | 4  | 0 | 0  | no  | TE |
| at_locus.05413 | 3 | 14,834,528 | 14,834,969 | 2  | 0 | 10 | yes | TE |
| at_locus.05414 | 3 | 14,835,228 | 14,835,561 | 8  | 0 | 8  | no  | TE |
| at_locus.05415 | 3 | 14,835,990 | 14,838,094 | 33 | 2 | 45 | no  | TE |
| at_locus.05416 | 3 | 14,844,666 | 14,845,334 | 7  | 0 | 5  | no  | TE |
| at_locus.05417 | 3 | 14,856,250 | 14,856,495 | 11 | 0 | 7  | no  | TE |
| at_locus.05418 | 3 | 14,856,724 | 14,856,765 | 0  | 0 | 12 | no  | TE |
| at_locus.05419 | 3 | 14,856,813 | 14,857,464 | 9  | 0 | 4  | no  | TE |
| at_locus.05420 | 3 | 14,857,834 | 14,857,946 | 1  | 0 | 4  | no  | TE |
| at_locus.05421 | 3 | 14,859,768 | 14,859,916 | 0  | 0 | 4  | no  | TE |
| at_locus.05422 | 3 | 14,860,075 | 14,860,197 | 4  | 0 | 0  | no  | TE |
| at_locus.05423 | 3 | 14,860,852 | 14,861,082 | 2  | 0 | 6  | no  | TE |
| at_locus.05424 | 3 | 14,862,342 | 14,862,511 | 0  | 0 | 4  | no  | TE |
| at_locus.05425 | 3 | 14,863,084 | 14,863,764 | 2  | 0 | 8  | yes | TE |
| at_locus.05426 | 3 | 14,865,151 | 14,865,684 | 0  | 0 | 6  | yes | TE |
| at_locus.05427 | 3 | 14,866,034 | 14,866,242 | 2  | 0 | 6  | yes | TE |
| at_locus.05428 | 3 | 14,866,415 | 14,866,683 | 5  | 0 | 1  | no  | TE |
| at_locus.05429 | 3 | 14,867,636 | 14,868,019 | 5  | 0 | 8  | no  | TE |
| at_locus.05430 | 3 | 14,868,243 | 14,868,793 | 2  | 0 | 8  | no  | TE |
| at_locus.05431 | 3 | 14,869,263 | 14,869,524 | 7  | 0 | 4  | no  | TE |
| at_locus.05432 | 3 | 14,869,641 | 14,869,985 | 2  | 0 | 13 | yes | TE |
| at_locus.05433 | 3 | 14,870,299 | 14,871,674 | 21 | 2 | 15 | yes | TE |
| at_locus.05434 | 3 | 14,871,952 | 14,872,227 | 1  | 0 | 4  | yes | TE |
| at_locus.05435 | 3 | 14,882,951 | 14,883,042 | 4  | 0 | 0  | no  |    |
| at_locus.05436 | 3 | 14,893,838 | 14,894,050 | 5  | 0 | 0  | yes | TE |
| at_locus.05437 | 3 | 14,901,455 | 14,901,485 | 0  | 0 | 4  | no  | TE |
| at_locus.05438 | 3 | 14,913,376 | 14,913,498 | 1  | 0 | 4  | yes | TE |
| at_locus.05439 | 3 | 14,922,505 | 14,922,997 | 0  | 0 | 10 | yes | TE |
| at_locus.05440 | 3 | 14,956,773 | 14,956,893 | 5  | 0 | 0  | yes | TE |

|                |   |            |            |    |   |    |     |    |
|----------------|---|------------|------------|----|---|----|-----|----|
| at_locus.05441 | 3 | 14,960,789 | 14,960,870 | 0  | 0 | 4  | yes |    |
| at_locus.05442 | 3 | 14,961,376 | 14,961,580 | 1  | 0 | 4  | yes |    |
| at_locus.05443 | 3 | 14,967,930 | 14,968,965 | 67 | 1 | 23 | no  | TE |
| at_locus.05444 | 3 | 14,969,255 | 14,970,765 | 52 | 0 | 19 | no  | TE |
| at_locus.05445 | 3 | 14,971,264 | 14,971,733 | 15 | 0 | 7  | no  | TE |
| at_locus.05446 | 3 | 14,972,372 | 14,973,318 | 86 | 4 | 16 | no  | TE |
| at_locus.05447 | 3 | 14,989,129 | 14,989,386 | 11 | 0 | 7  | yes | TE |
| at_locus.05448 | 3 | 14,990,553 | 14,990,810 | 4  | 0 | 4  | yes | TE |
| at_locus.05449 | 3 | 14,996,427 | 14,996,800 | 12 | 0 | 6  | no  | TE |
| at_locus.05450 | 3 | 15,001,080 | 15,001,541 | 25 | 0 | 20 | yes | TE |
| at_locus.05451 | 3 | 15,002,418 | 15,002,650 | 4  | 0 | 9  | yes |    |
| at_locus.05452 | 3 | 15,003,050 | 15,003,115 | 2  | 0 | 4  | yes |    |
| at_locus.05453 | 3 | 15,014,178 | 15,014,433 | 5  | 0 | 0  | no  | TE |
| at_locus.05454 | 3 | 15,014,673 | 15,015,006 | 5  | 0 | 5  | no  | TE |
| at_locus.05455 | 3 | 15,024,072 | 15,024,262 | 0  | 0 | 4  | no  | TE |
| at_locus.05456 | 3 | 15,034,034 | 15,034,064 | 5  | 0 | 0  | no  |    |
| at_locus.05457 | 3 | 15,035,843 | 15,036,073 | 7  | 0 | 2  | yes |    |
| at_locus.05458 | 3 | 15,042,515 | 15,042,939 | 5  | 0 | 1  | no  | TE |
| at_locus.05459 | 3 | 15,044,475 | 15,044,534 | 0  | 0 | 4  | yes | TE |
| at_locus.05460 | 3 | 15,048,828 | 15,049,124 | 6  | 0 | 7  | no  | TE |
| at_locus.05461 | 3 | 15,049,327 | 15,049,530 | 12 | 2 | 4  | no  | TE |
| at_locus.05462 | 3 | 15,049,875 | 15,050,103 | 2  | 0 | 6  | no  | TE |
| at_locus.05463 | 3 | 15,051,047 | 15,051,199 | 3  | 0 | 4  | yes | TE |
| at_locus.05464 | 3 | 15,053,621 | 15,053,899 | 4  | 0 | 3  | no  | TE |
| at_locus.05465 | 3 | 15,054,559 | 15,055,317 | 12 | 2 | 12 | no  | TE |
| at_locus.05466 | 3 | 15,088,719 | 15,089,043 | 0  | 0 | 4  | yes |    |
| at_locus.05467 | 3 | 15,089,252 | 15,089,374 | 4  | 0 | 2  | yes |    |
| at_locus.05468 | 3 | 15,092,170 | 15,092,410 | 8  | 0 | 2  | yes | TE |
| at_locus.05469 | 3 | 15,094,546 | 15,094,571 | 4  | 0 | 0  | no  | TE |
| at_locus.05470 | 3 | 15,094,814 | 15,095,272 | 11 | 0 | 16 | yes | TE |
| at_locus.05471 | 3 | 15,095,768 | 15,095,993 | 8  | 0 | 0  | yes | TE |
| at_locus.05472 | 3 | 15,096,871 | 15,097,205 | 1  | 0 | 8  | yes |    |
| at_locus.05473 | 3 | 15,097,620 | 15,098,296 | 3  | 0 | 12 | yes |    |
| at_locus.05474 | 3 | 15,102,299 | 15,102,489 | 4  | 0 | 0  | yes | TE |
| at_locus.05475 | 3 | 15,109,918 | 15,109,940 | 0  | 0 | 4  | no  | TE |
| at_locus.05476 | 3 | 15,110,891 | 15,110,992 | 4  | 0 | 0  | no  | TE |
| at_locus.05477 | 3 | 15,122,974 | 15,123,492 | 6  | 0 | 6  | yes | TE |

|                |   |            |            |    |   |    |     |    |
|----------------|---|------------|------------|----|---|----|-----|----|
| at_locus.05478 | 3 | 15,127,746 | 15,128,146 | 5  | 0 | 8  | no  | TE |
| at_locus.05479 | 3 | 15,128,924 | 15,129,107 | 1  | 0 | 6  | yes | TE |
| at_locus.05480 | 3 | 15,129,385 | 15,130,922 | 10 | 0 | 22 | yes | TE |
| at_locus.05481 | 3 | 15,132,244 | 15,132,711 | 1  | 0 | 7  | no  | TE |
| at_locus.05482 | 3 | 15,132,944 | 15,133,135 | 5  | 0 | 1  | no  | TE |
| at_locus.05483 | 3 | 15,143,633 | 15,143,835 | 4  | 0 | 1  | yes |    |
| at_locus.05484 | 3 | 15,147,798 | 15,148,191 | 12 | 0 | 1  | no  | TE |
| at_locus.05485 | 3 | 15,148,466 | 15,150,553 | 20 | 3 | 30 | no  | TE |
| at_locus.05486 | 3 | 15,152,219 | 15,152,393 | 4  | 0 | 0  | yes |    |
| at_locus.05487 | 3 | 15,154,494 | 15,155,232 | 6  | 0 | 3  | yes |    |
| at_locus.05488 | 3 | 15,158,492 | 15,158,882 | 4  | 0 | 3  | no  | TE |
| at_locus.05489 | 3 | 15,159,044 | 15,159,375 | 3  | 0 | 9  | no  | TE |
| at_locus.05490 | 3 | 15,159,985 | 15,160,050 | 2  | 0 | 6  | no  | TE |
| at_locus.05491 | 3 | 15,160,384 | 15,160,472 | 0  | 0 | 4  | no  | TE |
| at_locus.05492 | 3 | 15,160,744 | 15,161,239 | 8  | 0 | 7  | yes | TE |
| at_locus.05493 | 3 | 15,161,872 | 15,164,817 | 65 | 5 | 68 | yes | TE |
| at_locus.05494 | 3 | 15,168,404 | 15,168,429 | 0  | 0 | 4  | no  | TE |
| at_locus.05495 | 3 | 15,169,404 | 15,169,675 | 2  | 0 | 4  | no  | TE |
| at_locus.05496 | 3 | 15,171,938 | 15,172,331 | 9  | 0 | 1  | no  | TE |
| at_locus.05497 | 3 | 15,177,458 | 15,177,807 | 6  | 0 | 0  | yes |    |
| at_locus.05498 | 3 | 15,178,401 | 15,178,701 | 31 | 0 | 11 | yes |    |
| at_locus.05499 | 3 | 15,179,046 | 15,179,328 | 6  | 0 | 7  | yes | TE |
| at_locus.05500 | 3 | 15,199,869 | 15,200,007 | 5  | 0 | 2  | yes | TE |
| at_locus.05501 | 3 | 15,200,960 | 15,201,026 | 13 | 0 | 1  | yes |    |
| at_locus.05502 | 3 | 15,230,226 | 15,231,107 | 25 | 0 | 28 | yes | TE |
| at_locus.05503 | 3 | 15,232,005 | 15,232,676 | 21 | 0 | 23 | yes |    |
| at_locus.05504 | 3 | 15,243,062 | 15,243,121 | 5  | 0 | 0  | yes |    |
| at_locus.05505 | 3 | 15,244,340 | 15,244,488 | 6  | 0 | 1  | yes |    |
| at_locus.05506 | 3 | 15,256,657 | 15,256,803 | 4  | 0 | 0  | yes |    |
| at_locus.05507 | 3 | 15,262,000 | 15,264,066 | 30 | 4 | 41 | yes | TE |
| at_locus.05508 | 3 | 15,264,539 | 15,265,233 | 17 | 0 | 9  | no  | TE |
| at_locus.05509 | 3 | 15,266,969 | 15,267,221 | 7  | 0 | 2  | no  | TE |
| at_locus.05510 | 3 | 15,267,653 | 15,267,959 | 7  | 0 | 11 | no  | TE |
| at_locus.05511 | 3 | 15,268,332 | 15,269,075 | 3  | 0 | 11 | yes | TE |
| at_locus.05512 | 3 | 15,269,292 | 15,269,776 | 7  | 0 | 9  | no  | TE |
| at_locus.05513 | 3 | 15,270,106 | 15,270,271 | 9  | 0 | 4  | no  | TE |
| at_locus.05514 | 3 | 15,270,514 | 15,271,465 | 16 | 0 | 15 | yes | TE |

|                |   |            |            |    |   |    |     |    |
|----------------|---|------------|------------|----|---|----|-----|----|
| at_locus.05515 | 3 | 15,271,880 | 15,272,330 | 5  | 0 | 7  | no  | TE |
| at_locus.05516 | 3 | 15,272,522 | 15,273,188 | 14 | 1 | 12 | no  | TE |
| at_locus.05517 | 3 | 15,273,220 | 15,273,585 | 4  | 0 | 0  | no  | TE |
| at_locus.05518 | 3 | 15,273,622 | 15,274,685 | 11 | 1 | 30 | no  | TE |
| at_locus.05519 | 3 | 15,281,925 | 15,282,069 | 5  | 0 | 4  | yes | TE |
| at_locus.05520 | 3 | 15,282,271 | 15,282,785 | 8  | 0 | 2  | yes | TE |
| at_locus.05521 | 3 | 15,305,616 | 15,306,186 | 12 | 0 | 18 | yes |    |
| at_locus.05522 | 3 | 15,306,788 | 15,307,057 | 8  | 0 | 12 | yes |    |
| at_locus.05523 | 3 | 15,311,817 | 15,312,100 | 6  | 0 | 1  | no  | TE |
| at_locus.05524 | 3 | 15,313,121 | 15,313,365 | 4  | 0 | 0  | no  | TE |
| at_locus.05525 | 3 | 15,313,788 | 15,314,874 | 26 | 0 | 13 | yes | TE |
| at_locus.05526 | 3 | 15,314,995 | 15,315,169 | 2  | 1 | 6  | yes | TE |
| at_locus.05527 | 3 | 15,316,202 | 15,316,292 | 1  | 0 | 5  | no  | TE |
| at_locus.05528 | 3 | 15,325,852 | 15,326,076 | 1  | 0 | 6  | no  | TE |
| at_locus.05529 | 3 | 15,326,640 | 15,326,769 | 4  | 0 | 0  | no  | TE |
| at_locus.05530 | 3 | 15,328,880 | 15,329,169 | 7  | 0 | 0  | no  | TE |
| at_locus.05531 | 3 | 15,329,205 | 15,329,883 | 55 | 3 | 9  | no  | TE |
| at_locus.05532 | 3 | 15,331,006 | 15,331,409 | 29 | 1 | 1  | no  | TE |
| at_locus.05533 | 3 | 15,331,564 | 15,332,016 | 4  | 0 | 12 | yes | TE |
| at_locus.05534 | 3 | 15,332,205 | 15,332,537 | 9  | 0 | 8  | no  | TE |
| at_locus.05535 | 3 | 15,332,936 | 15,333,835 | 3  | 0 | 15 | no  | TE |
| at_locus.05536 | 3 | 15,334,216 | 15,334,459 | 5  | 0 | 3  | no  | TE |
| at_locus.05537 | 3 | 15,334,632 | 15,334,954 | 4  | 0 | 5  | no  | TE |
| at_locus.05538 | 3 | 15,335,100 | 15,335,725 | 6  | 0 | 11 | no  | TE |
| at_locus.05539 | 3 | 15,337,437 | 15,337,724 | 1  | 0 | 4  | no  | TE |
| at_locus.05540 | 3 | 15,337,869 | 15,338,391 | 8  | 0 | 7  | no  | TE |
| at_locus.05541 | 3 | 15,339,021 | 15,339,362 | 4  | 0 | 1  | yes | TE |
| at_locus.05542 | 3 | 15,340,212 | 15,340,324 | 1  | 0 | 4  | no  | TE |
| at_locus.05543 | 3 | 15,340,664 | 15,341,345 | 9  | 0 | 6  | no  | TE |
| at_locus.05544 | 3 | 15,341,393 | 15,342,055 | 15 | 0 | 21 | no  | TE |
| at_locus.05545 | 3 | 15,371,668 | 15,371,772 | 1  | 0 | 5  | yes |    |
| at_locus.05546 | 3 | 15,382,914 | 15,383,234 | 9  | 0 | 4  | no  | TE |
| at_locus.05547 | 3 | 15,395,417 | 15,395,766 | 0  | 0 | 4  | yes | TE |
| at_locus.05548 | 3 | 15,397,347 | 15,397,374 | 5  | 0 | 0  | yes | TE |
| at_locus.05549 | 3 | 15,406,469 | 15,407,837 | 16 | 0 | 16 | yes | TE |
| at_locus.05550 | 3 | 15,408,049 | 15,408,448 | 31 | 1 | 9  | yes |    |
| at_locus.05551 | 3 | 15,409,325 | 15,409,655 | 7  | 0 | 9  | yes |    |

|                |   |            |            |    |   |    |     |    |
|----------------|---|------------|------------|----|---|----|-----|----|
| at_locus.05552 | 3 | 15,409,991 | 15,410,536 | 8  | 1 | 14 | yes |    |
| at_locus.05553 | 3 | 15,421,727 | 15,421,930 | 4  | 0 | 2  | yes |    |
| at_locus.05554 | 3 | 15,429,480 | 15,429,524 | 4  | 0 | 0  | yes |    |
| at_locus.05555 | 3 | 15,431,012 | 15,431,187 | 10 | 0 | 0  | yes |    |
| at_locus.05556 | 3 | 15,438,196 | 15,438,398 | 0  | 0 | 4  | yes | TE |
| at_locus.05557 | 3 | 15,440,909 | 15,441,342 | 6  | 0 | 2  | yes | TE |
| at_locus.05558 | 3 | 15,446,238 | 15,446,571 | 33 | 1 | 4  | yes | TE |
| at_locus.05559 | 3 | 15,448,262 | 15,448,383 | 6  | 0 | 0  | no  |    |
| at_locus.05560 | 3 | 15,462,566 | 15,462,603 | 10 | 0 | 0  | no  | TE |
| at_locus.05561 | 3 | 15,462,856 | 15,463,247 | 17 | 0 | 0  | no  | TE |
| at_locus.05562 | 3 | 15,463,528 | 15,463,778 | 4  | 2 | 0  | no  | TE |
| at_locus.05563 | 3 | 15,465,725 | 15,465,755 | 5  | 0 | 0  | no  |    |
| at_locus.05564 | 3 | 15,467,594 | 15,468,072 | 8  | 0 | 12 | no  | TE |
| at_locus.05565 | 3 | 15,471,174 | 15,471,541 | 6  | 0 | 1  | yes | TE |
| at_locus.05566 | 3 | 15,471,776 | 15,472,040 | 1  | 0 | 4  | yes | TE |
| at_locus.05567 | 3 | 15,473,233 | 15,473,620 | 3  | 0 | 5  | yes | TE |
| at_locus.05568 | 3 | 15,475,621 | 15,475,818 | 0  | 0 | 5  | yes | TE |
| at_locus.05569 | 3 | 15,481,012 | 15,481,042 | 5  | 0 | 0  | no  |    |
| at_locus.05570 | 3 | 15,482,880 | 15,483,428 | 5  | 0 | 15 | no  | TE |
| at_locus.05571 | 3 | 15,487,549 | 15,487,666 | 5  | 0 | 0  | no  | TE |
| at_locus.05572 | 3 | 15,487,766 | 15,488,407 | 40 | 2 | 10 | no  | TE |
| at_locus.05573 | 3 | 15,495,769 | 15,496,247 | 22 | 2 | 1  | yes | TE |
| at_locus.05574 | 3 | 15,512,288 | 15,512,384 | 4  | 0 | 0  | yes |    |
| at_locus.05575 | 3 | 15,518,771 | 15,518,907 | 5  | 0 | 0  | yes | TE |
| at_locus.05576 | 3 | 15,519,079 | 15,519,094 | 0  | 0 | 6  | no  | TE |
| at_locus.05577 | 3 | 15,519,519 | 15,520,169 | 6  | 0 | 7  | yes | TE |
| at_locus.05578 | 3 | 15,573,035 | 15,574,090 | 20 | 0 | 24 | yes |    |
| at_locus.05579 | 3 | 15,595,360 | 15,595,688 | 4  | 0 | 0  | yes | TE |
| at_locus.05580 | 3 | 15,598,161 | 15,598,298 | 4  | 0 | 0  | no  | TE |
| at_locus.05581 | 3 | 15,598,658 | 15,598,808 | 4  | 0 | 0  | no  | TE |
| at_locus.05582 | 3 | 15,601,440 | 15,601,636 | 0  | 0 | 5  | no  | TE |
| at_locus.05583 | 3 | 15,622,407 | 15,622,932 | 9  | 0 | 7  | yes | TE |
| at_locus.05584 | 3 | 15,623,499 | 15,623,873 | 22 | 0 | 12 | yes |    |
| at_locus.05585 | 3 | 15,624,468 | 15,625,259 | 18 | 0 | 13 | yes |    |
| at_locus.05586 | 3 | 15,630,244 | 15,630,913 | 11 | 0 | 16 | yes | TE |
| at_locus.05587 | 3 | 15,631,644 | 15,632,143 | 0  | 0 | 4  | yes |    |
| at_locus.05588 | 3 | 15,642,629 | 15,642,675 | 1  | 0 | 6  | yes | TE |

|                |   |            |            |     |    |     |     |    |
|----------------|---|------------|------------|-----|----|-----|-----|----|
| at_locus.05589 | 3 | 15,642,915 | 15,643,142 | 9   | 0  | 5   | yes |    |
| at_locus.05590 | 3 | 15,643,464 | 15,644,196 | 54  | 1  | 31  | yes |    |
| at_locus.05591 | 3 | 15,644,338 | 15,645,439 | 56  | 1  | 59  | yes | TE |
| at_locus.05592 | 3 | 15,645,678 | 15,646,697 | 57  | 2  | 66  | yes | TE |
| at_locus.05593 | 3 | 15,646,911 | 15,648,334 | 47  | 2  | 55  | yes | TE |
| at_locus.05594 | 3 | 15,648,900 | 15,649,364 | 10  | 1  | 1   | yes |    |
| at_locus.05595 | 3 | 15,649,738 | 15,650,869 | 24  | 0  | 29  | yes | TE |
| at_locus.05596 | 3 | 15,651,352 | 15,651,429 | 0   | 0  | 4   | yes |    |
| at_locus.05597 | 3 | 15,652,566 | 15,653,314 | 23  | 0  | 16  | yes |    |
| at_locus.05598 | 3 | 15,653,937 | 15,654,286 | 11  | 0  | 3   | yes |    |
| at_locus.05599 | 3 | 15,662,329 | 15,662,726 | 0   | 0  | 9   | no  | TE |
| at_locus.05600 | 3 | 15,662,808 | 15,663,435 | 11  | 0  | 1   | no  | TE |
| at_locus.05601 | 3 | 15,677,863 | 15,677,928 | 10  | 0  | 3   | yes | TE |
| at_locus.05602 | 3 | 15,678,263 | 15,678,310 | 5   | 0  | 0   | no  | TE |
| at_locus.05603 | 3 | 15,688,079 | 15,688,371 | 6   | 3  | 5   | yes | TE |
| at_locus.05604 | 3 | 15,688,719 | 15,688,964 | 5   | 0  | 2   | yes | TE |
| at_locus.05605 | 3 | 15,692,407 | 15,692,832 | 57  | 2  | 6   | yes | TE |
| at_locus.05606 | 3 | 15,693,047 | 15,693,989 | 205 | 1  | 167 | yes |    |
| at_locus.05607 | 3 | 15,698,386 | 15,698,931 | 11  | 0  | 5   | yes | TE |
| at_locus.05608 | 3 | 15,699,115 | 15,699,247 | 0   | 0  | 4   | yes |    |
| at_locus.05609 | 3 | 15,722,502 | 15,725,453 | 50  | 4  | 65  | yes | TE |
| at_locus.05610 | 3 | 15,725,598 | 15,727,794 | 65  | 4  | 66  | yes | TE |
| at_locus.05611 | 3 | 15,728,391 | 15,729,099 | 18  | 0  | 6   | yes | TE |
| at_locus.05612 | 3 | 15,729,797 | 15,731,509 | 27  | 0  | 23  | no  | TE |
| at_locus.05613 | 3 | 15,731,778 | 15,733,664 | 29  | 3  | 49  | no  | TE |
| at_locus.05614 | 3 | 15,739,926 | 15,740,305 | 6   | 0  | 2   | no  | TE |
| at_locus.05615 | 3 | 15,743,495 | 15,743,743 | 1   | 0  | 5   | yes |    |
| at_locus.05616 | 3 | 15,743,805 | 15,744,615 | 48  | 0  | 15  | yes | TE |
| at_locus.05617 | 3 | 15,745,719 | 15,745,827 | 1   | 0  | 7   | yes |    |
| at_locus.05618 | 3 | 15,746,326 | 15,746,783 | 3   | 0  | 6   | yes |    |
| at_locus.05619 | 3 | 15,749,895 | 15,750,202 | 1   | 0  | 6   | no  | TE |
| at_locus.05620 | 3 | 15,750,254 | 15,750,524 | 4   | 0  | 1   | no  | TE |
| at_locus.05621 | 3 | 15,750,799 | 15,751,011 | 5   | 0  | 6   | yes | TE |
| at_locus.05622 | 3 | 15,757,512 | 15,757,603 | 4   | 0  | 1   | no  |    |
| at_locus.05623 | 3 | 15,778,260 | 15,778,490 | 6   | 0  | 1   | yes |    |
| at_locus.05624 | 3 | 15,791,704 | 15,791,736 | 5   | 0  | 0   | yes |    |
| at_locus.05625 | 3 | 15,795,465 | 15,795,653 | 8   | 12 | 13  | yes | TE |

|                |   |            |            |    |   |    |     |    |
|----------------|---|------------|------------|----|---|----|-----|----|
| at_locus.05626 | 3 | 15,797,270 | 15,797,446 | 13 | 1 | 2  | no  | TE |
| at_locus.05627 | 3 | 15,799,929 | 15,800,146 | 2  | 1 | 6  | yes | TE |
| at_locus.05628 | 3 | 15,805,640 | 15,805,761 | 4  | 0 | 0  | yes | TE |
| at_locus.05629 | 3 | 15,807,148 | 15,807,208 | 5  | 1 | 0  | yes |    |
| at_locus.05630 | 3 | 15,808,728 | 15,809,185 | 9  | 0 | 7  | yes | TE |
| at_locus.05631 | 3 | 15,810,032 | 15,810,276 | 6  | 0 | 4  | yes |    |
| at_locus.05632 | 3 | 15,814,478 | 15,814,665 | 1  | 0 | 5  | yes |    |
| at_locus.05633 | 3 | 15,824,764 | 15,824,869 | 0  | 0 | 4  | yes |    |
| at_locus.05634 | 3 | 15,825,265 | 15,825,861 | 50 | 2 | 3  | yes | TE |
| at_locus.05635 | 3 | 15,826,689 | 15,827,921 | 51 | 0 | 18 | yes | TE |
| at_locus.05636 | 3 | 15,828,390 | 15,829,271 | 56 | 0 | 11 | yes | TE |
| at_locus.05637 | 3 | 15,842,173 | 15,842,314 | 5  | 0 | 2  | no  | TE |
| at_locus.05638 | 3 | 15,843,745 | 15,843,779 | 4  | 0 | 0  | no  |    |
| at_locus.05639 | 3 | 15,874,987 | 15,875,498 | 5  | 1 | 2  | no  | TE |
| at_locus.05640 | 3 | 15,879,200 | 15,879,397 | 5  | 0 | 0  | yes | TE |
| at_locus.05641 | 3 | 15,884,393 | 15,884,556 | 6  | 1 | 0  | yes | TE |
| at_locus.05642 | 3 | 15,885,083 | 15,885,718 | 19 | 0 | 0  | yes | TE |
| at_locus.05643 | 3 | 15,886,028 | 15,886,318 | 6  | 0 | 0  | yes |    |
| at_locus.05644 | 3 | 15,887,892 | 15,888,030 | 17 | 1 | 0  | yes |    |
| at_locus.05645 | 3 | 15,910,688 | 15,911,169 | 6  | 0 | 4  | yes |    |
| at_locus.05646 | 3 | 15,915,153 | 15,915,596 | 8  | 2 | 1  | yes |    |
| at_locus.05647 | 3 | 15,926,896 | 15,926,975 | 5  | 0 | 1  | yes |    |
| at_locus.05648 | 3 | 15,928,007 | 15,928,376 | 10 | 0 | 1  | yes | TE |
| at_locus.05649 | 3 | 15,929,082 | 15,929,220 | 10 | 0 | 0  | no  | TE |
| at_locus.05650 | 3 | 15,929,514 | 15,929,676 | 20 | 0 | 0  | no  | TE |
| at_locus.05651 | 3 | 15,930,393 | 15,930,415 | 4  | 0 | 0  | yes | TE |
| at_locus.05652 | 3 | 15,937,932 | 15,938,296 | 19 | 0 | 0  | yes | TE |
| at_locus.05653 | 3 | 15,942,213 | 15,942,291 | 4  | 1 | 0  | yes | TE |
| at_locus.05654 | 3 | 15,943,029 | 15,943,071 | 5  | 0 | 0  | yes |    |
| at_locus.05655 | 3 | 15,944,188 | 15,944,213 | 5  | 0 | 0  | yes |    |
| at_locus.05656 | 3 | 15,945,285 | 15,945,521 | 6  | 0 | 2  | yes | TE |
| at_locus.05657 | 3 | 15,948,273 | 15,948,348 | 8  | 0 | 0  | no  | TE |
| at_locus.05658 | 3 | 15,948,989 | 15,949,277 | 11 | 0 | 0  | no  | TE |
| at_locus.05659 | 3 | 15,949,604 | 15,949,821 | 26 | 2 | 1  | no  | TE |
| at_locus.05660 | 3 | 15,950,096 | 15,950,356 | 24 | 0 | 0  | no  | TE |
| at_locus.05661 | 3 | 15,954,689 | 15,954,936 | 7  | 2 | 6  | yes |    |
| at_locus.05662 | 3 | 15,955,183 | 15,956,098 | 17 | 0 | 7  | yes | TE |

|                |   |            |            |    |     |    |     |    |
|----------------|---|------------|------------|----|-----|----|-----|----|
| at_locus.05663 | 3 | 15,978,832 | 15,978,854 | 4  | 0   | 0  | no  | TE |
| at_locus.05664 | 3 | 15,988,415 | 15,988,495 | 4  | 0   | 0  | yes | TE |
| at_locus.05665 | 3 | 15,989,028 | 15,989,293 | 13 | 0   | 0  | yes | TE |
| at_locus.05666 | 3 | 16,050,009 | 16,051,009 | 75 | 4   | 23 | yes | TE |
| at_locus.05667 | 3 | 16,051,378 | 16,052,047 | 21 | 0   | 9  | no  | TE |
| at_locus.05668 | 3 | 16,053,241 | 16,053,270 | 4  | 0   | 0  | no  | TE |
| at_locus.05669 | 3 | 16,063,280 | 16,063,504 | 4  | 0   | 0  | yes |    |
| at_locus.05670 | 3 | 16,067,153 | 16,067,200 | 4  | 0   | 0  | no  |    |
| at_locus.05671 | 3 | 16,071,819 | 16,072,354 | 9  | 0   | 0  | no  |    |
| at_locus.05672 | 3 | 16,073,845 | 16,073,874 | 4  | 0   | 0  | no  | TE |
| at_locus.05673 | 3 | 16,075,130 | 16,075,614 | 16 | 0   | 6  | yes | TE |
| at_locus.05674 | 3 | 16,076,228 | 16,076,760 | 17 | 0   | 13 | yes | TE |
| at_locus.05675 | 3 | 16,077,309 | 16,078,218 | 64 | 2   | 9  | yes | TE |
| at_locus.05676 | 3 | 16,081,769 | 16,082,047 | 4  | 0   | 0  | yes |    |
| at_locus.05677 | 3 | 16,082,832 | 16,083,031 | 18 | 0   | 1  | yes |    |
| at_locus.05678 | 3 | 16,090,301 | 16,090,535 | 7  | 0   | 0  | yes | TE |
| at_locus.05679 | 3 | 16,095,390 | 16,095,464 | 4  | 1   | 0  | yes |    |
| at_locus.05680 | 3 | 16,097,599 | 16,098,228 | 10 | 0   | 3  | no  | TE |
| at_locus.05681 | 3 | 16,098,466 | 16,098,726 | 24 | 0   | 17 | no  | TE |
| at_locus.05682 | 3 | 16,100,533 | 16,100,737 | 4  | 0   | 0  | yes |    |
| at_locus.05683 | 3 | 16,101,160 | 16,101,286 | 4  | 0   | 1  | yes | TE |
| at_locus.05684 | 3 | 16,110,101 | 16,110,341 | 7  | 0   | 0  | no  |    |
| at_locus.05685 | 3 | 16,111,773 | 16,112,722 | 50 | 2   | 25 | yes | TE |
| at_locus.05686 | 3 | 16,113,269 | 16,113,414 | 4  | 0   | 0  | no  | TE |
| at_locus.05687 | 3 | 16,114,711 | 16,115,228 | 5  | 0   | 2  | no  | TE |
| at_locus.05688 | 3 | 16,116,108 | 16,116,569 | 8  | 0   | 5  | no  | TE |
| at_locus.05689 | 3 | 16,116,833 | 16,117,048 | 6  | 0   | 1  | no  | TE |
| at_locus.05690 | 3 | 16,125,378 | 16,125,422 | 5  | 0   | 0  | yes |    |
| at_locus.05691 | 3 | 16,152,726 | 16,153,405 | 8  | 0   | 2  | yes | TE |
| at_locus.05692 | 3 | 16,153,831 | 16,154,756 | 11 | 0   | 3  | no  | TE |
| at_locus.05693 | 3 | 16,154,972 | 16,155,153 | 15 | 0   | 1  | no  | TE |
| at_locus.05694 | 3 | 16,169,786 | 16,172,547 | 95 | 126 | 95 | yes |    |
| at_locus.05695 | 3 | 16,192,652 | 16,193,336 | 5  | 0   | 1  | yes | TE |
| at_locus.05696 | 3 | 16,193,560 | 16,194,178 | 9  | 0   | 5  | yes | TE |
| at_locus.05697 | 3 | 16,196,409 | 16,197,143 | 22 | 0   | 2  | no  | TE |
| at_locus.05698 | 3 | 16,198,643 | 16,198,810 | 9  | 0   | 0  | yes |    |
| at_locus.05699 | 3 | 16,212,952 | 16,213,242 | 5  | 0   | 2  | yes |    |



|                |   |            |            |    |   |    |     |    |
|----------------|---|------------|------------|----|---|----|-----|----|
| at_locus.05700 | 3 | 16,215,949 | 16,216,066 | 6  | 0 | 0  | yes |    |
| at_locus.05701 | 3 | 16,223,846 | 16,223,998 | 6  | 0 | 0  | no  | TE |
| at_locus.05702 | 3 | 16,224,265 | 16,224,339 | 18 | 0 | 3  | yes | TE |
| at_locus.05703 | 3 | 16,235,221 | 16,235,295 | 5  | 0 | 0  | no  | TE |
| at_locus.05704 | 3 | 16,236,717 | 16,237,312 | 10 | 0 | 0  | no  |    |
| at_locus.05705 | 3 | 16,245,649 | 16,245,924 | 16 | 0 | 2  | yes | TE |
| at_locus.05706 | 3 | 16,246,629 | 16,246,694 | 7  | 0 | 0  | no  | TE |
| at_locus.05707 | 3 | 16,252,198 | 16,252,797 | 23 | 2 | 5  | yes | TE |
| at_locus.05708 | 3 | 16,277,667 | 16,277,754 | 4  | 0 | 1  | no  | TE |
| at_locus.05709 | 3 | 16,279,921 | 16,280,493 | 18 | 0 | 5  | yes | TE |
| at_locus.05710 | 3 | 16,290,872 | 16,291,153 | 13 | 0 | 4  | yes | TE |
| at_locus.05711 | 3 | 16,291,502 | 16,292,099 | 19 | 0 | 17 | yes |    |
| at_locus.05712 | 3 | 16,304,563 | 16,305,065 | 11 | 0 | 2  | yes | TE |
| at_locus.05713 | 3 | 16,313,790 | 16,314,014 | 6  | 0 | 0  | yes | TE |
| at_locus.05714 | 3 | 16,344,913 | 16,345,770 | 61 | 0 | 10 | no  | TE |
| at_locus.05715 | 3 | 16,346,103 | 16,347,641 | 22 | 1 | 47 | yes | TE |
| at_locus.05716 | 3 | 16,347,746 | 16,351,786 | 54 | 1 | 87 | yes | TE |
| at_locus.05717 | 3 | 16,352,368 | 16,352,880 | 45 | 1 | 4  | yes | TE |
| at_locus.05718 | 3 | 16,364,254 | 16,364,289 | 10 | 0 | 0  | no  | TE |
| at_locus.05719 | 3 | 16,364,455 | 16,365,059 | 1  | 0 | 3  | yes | TE |
| at_locus.05720 | 3 | 16,365,222 | 16,365,394 | 32 | 2 | 2  | yes | TE |
| at_locus.05721 | 3 | 16,367,481 | 16,367,619 | 1  | 0 | 4  | no  |    |
| at_locus.05722 | 3 | 16,368,643 | 16,368,732 | 2  | 0 | 6  | yes |    |
| at_locus.05723 | 3 | 16,416,237 | 16,416,735 | 16 | 0 | 0  | no  | TE |
| at_locus.05724 | 3 | 16,417,110 | 16,417,160 | 4  | 0 | 0  | yes | TE |
| at_locus.05725 | 3 | 16,419,675 | 16,420,274 | 24 | 0 | 17 | yes |    |
| at_locus.05726 | 3 | 16,428,856 | 16,429,298 | 19 | 0 | 9  | no  | TE |
| at_locus.05727 | 3 | 16,430,137 | 16,430,171 | 8  | 0 | 0  | no  | TE |
| at_locus.05728 | 3 | 16,430,616 | 16,430,748 | 12 | 0 | 0  | no  | TE |
| at_locus.05729 | 3 | 16,431,043 | 16,431,197 | 13 | 0 | 0  | no  | TE |
| at_locus.05730 | 3 | 16,449,352 | 16,449,525 | 14 | 0 | 0  | yes | TE |
| at_locus.05731 | 3 | 16,462,534 | 16,462,907 | 34 | 0 | 0  | no  | TE |
| at_locus.05732 | 3 | 16,463,142 | 16,463,458 | 21 | 0 | 0  | yes | TE |
| at_locus.05733 | 3 | 16,473,943 | 16,474,025 | 6  | 0 | 0  | yes |    |
| at_locus.05734 | 3 | 16,481,924 | 16,482,262 | 5  | 0 | 0  | yes |    |
| at_locus.05735 | 3 | 16,496,295 | 16,496,819 | 12 | 0 | 1  | no  | TE |
| at_locus.05736 | 3 | 16,512,197 | 16,512,792 | 10 | 0 | 10 | no  | TE |

|                |   |            |            |    |   |    |     |    |
|----------------|---|------------|------------|----|---|----|-----|----|
| at_locus.05737 | 3 | 16,521,762 | 16,522,139 | 12 | 0 | 1  | no  | TE |
| at_locus.05738 | 3 | 16,522,413 | 16,522,915 | 8  | 1 | 17 | yes | TE |
| at_locus.05739 | 3 | 16,531,810 | 16,531,884 | 4  | 0 | 0  | no  |    |
| at_locus.05740 | 3 | 16,533,019 | 16,533,214 | 5  | 0 | 0  | yes | TE |
| at_locus.05741 | 3 | 16,545,492 | 16,545,543 | 15 | 0 | 0  | no  | TE |
| at_locus.05742 | 3 | 16,546,191 | 16,546,277 | 5  | 0 | 0  | no  | TE |
| at_locus.05743 | 3 | 16,546,630 | 16,546,681 | 5  | 0 | 0  | yes | TE |
| at_locus.05744 | 3 | 16,549,341 | 16,549,402 | 20 | 0 | 1  | yes | TE |
| at_locus.05745 | 3 | 16,550,485 | 16,550,567 | 4  | 0 | 0  | yes | TE |
| at_locus.05746 | 3 | 16,559,744 | 16,560,076 | 0  | 0 | 5  | yes |    |
| at_locus.05747 | 3 | 16,564,305 | 16,564,370 | 5  | 0 | 0  | yes | TE |
| at_locus.05748 | 3 | 16,567,007 | 16,567,321 | 6  | 0 | 0  | yes |    |
| at_locus.05749 | 3 | 16,572,639 | 16,572,724 | 16 | 0 | 0  | no  | TE |
| at_locus.05750 | 3 | 16,573,214 | 16,573,917 | 42 | 2 | 1  | no  | TE |
| at_locus.05751 | 3 | 16,574,278 | 16,574,570 | 18 | 0 | 0  | no  | TE |
| at_locus.05752 | 3 | 16,579,231 | 16,579,561 | 5  | 0 | 0  | yes | TE |
| at_locus.05753 | 3 | 16,600,306 | 16,600,440 | 4  | 0 | 2  | yes | TE |
| at_locus.05754 | 3 | 16,605,390 | 16,605,625 | 4  | 0 | 3  | yes | TE |
| at_locus.05755 | 3 | 16,637,116 | 16,637,821 | 24 | 0 | 18 | yes |    |
| at_locus.05756 | 3 | 16,656,109 | 16,656,211 | 1  | 1 | 5  | yes | TE |
| at_locus.05757 | 3 | 16,657,796 | 16,657,944 | 3  | 0 | 7  | no  | TE |
| at_locus.05758 | 3 | 16,688,603 | 16,688,630 | 4  | 0 | 0  | no  | TE |
| at_locus.05759 | 3 | 16,689,273 | 16,689,389 | 13 | 0 | 0  | no  | TE |
| at_locus.05760 | 3 | 16,693,022 | 16,693,748 | 9  | 0 | 0  | no  |    |
| at_locus.05761 | 3 | 16,711,088 | 16,711,400 | 10 | 3 | 4  | yes | TE |
| at_locus.05762 | 3 | 16,726,294 | 16,726,321 | 15 | 0 | 3  | no  | TE |
| at_locus.05763 | 3 | 16,730,528 | 16,730,654 | 15 | 0 | 5  | no  | TE |
| at_locus.05764 | 3 | 16,734,212 | 16,734,254 | 14 | 0 | 0  | no  | TE |
| at_locus.05765 | 3 | 16,742,927 | 16,743,008 | 6  | 0 | 0  | yes | TE |
| at_locus.05766 | 3 | 16,777,333 | 16,777,356 | 4  | 0 | 0  | no  |    |
| at_locus.05767 | 3 | 16,781,383 | 16,781,529 | 35 | 1 | 0  | yes | TE |
| at_locus.05768 | 3 | 16,798,616 | 16,798,962 | 58 | 3 | 3  | yes | TE |
| at_locus.05769 | 3 | 16,809,281 | 16,809,317 | 16 | 0 | 0  | yes |    |
| at_locus.05770 | 3 | 16,825,004 | 16,825,219 | 6  | 1 | 1  | yes | TE |
| at_locus.05771 | 3 | 16,828,879 | 16,828,976 | 6  | 0 | 0  | yes | TE |
| at_locus.05772 | 3 | 16,857,977 | 16,858,188 | 5  | 1 | 3  | yes | TE |
| at_locus.05773 | 3 | 16,858,417 | 16,858,808 | 7  | 0 | 1  | yes | TE |

|                |   |            |            |    |   |    |     |    |
|----------------|---|------------|------------|----|---|----|-----|----|
| at_locus.05774 | 3 | 16,862,613 | 16,862,790 | 8  | 0 | 3  | no  |    |
| at_locus.05775 | 3 | 16,864,138 | 16,864,355 | 15 | 0 | 0  | yes | TE |
| at_locus.05776 | 3 | 16,887,638 | 16,888,279 | 13 | 0 | 12 | yes |    |
| at_locus.05777 | 3 | 16,888,463 | 16,889,008 | 11 | 0 | 14 | yes | TE |
| at_locus.05778 | 3 | 16,890,736 | 16,891,020 | 9  | 0 | 0  | no  | TE |
| at_locus.05779 | 3 | 16,891,499 | 16,892,025 | 20 | 0 | 2  | yes | TE |
| at_locus.05780 | 3 | 16,892,374 | 16,892,603 | 16 | 0 | 2  | yes | TE |
| at_locus.05781 | 3 | 16,913,319 | 16,913,346 | 4  | 0 | 0  | no  | TE |
| at_locus.05782 | 3 | 16,913,985 | 16,914,075 | 8  | 0 | 0  | no  | TE |
| at_locus.05783 | 3 | 16,962,195 | 16,962,738 | 11 | 0 | 13 | no  |    |
| at_locus.05784 | 3 | 16,985,524 | 16,985,849 | 6  | 0 | 5  | yes |    |
| at_locus.05785 | 3 | 17,004,253 | 17,004,506 | 13 | 0 | 0  | no  |    |
| at_locus.05786 | 3 | 17,022,018 | 17,022,363 | 0  | 0 | 4  | yes |    |
| at_locus.05787 | 3 | 17,044,251 | 17,044,385 | 7  | 0 | 2  | no  | TE |
| at_locus.05788 | 3 | 17,046,351 | 17,046,672 | 23 | 0 | 0  | yes |    |
| at_locus.05789 | 3 | 17,059,448 | 17,059,475 | 7  | 0 | 0  | no  | TE |
| at_locus.05790 | 3 | 17,070,672 | 17,070,897 | 7  | 0 | 1  | no  |    |
| at_locus.05791 | 3 | 17,072,373 | 17,072,794 | 19 | 0 | 0  | no  | TE |
| at_locus.05792 | 3 | 17,073,034 | 17,073,519 | 17 | 0 | 0  | no  | TE |
| at_locus.05793 | 3 | 17,074,173 | 17,074,214 | 4  | 0 | 0  | no  | TE |
| at_locus.05794 | 3 | 17,080,005 | 17,080,330 | 8  | 0 | 0  | no  | TE |
| at_locus.05795 | 3 | 17,080,724 | 17,080,825 | 4  | 0 | 1  | yes | TE |
| at_locus.05796 | 3 | 17,081,638 | 17,082,210 | 33 | 0 | 2  | yes | TE |
| at_locus.05797 | 3 | 17,082,444 | 17,082,693 | 6  | 0 | 0  | yes |    |
| at_locus.05798 | 3 | 17,098,024 | 17,098,362 | 11 | 0 | 2  | yes |    |
| at_locus.05799 | 3 | 17,109,674 | 17,109,734 | 8  | 0 | 0  | no  |    |
| at_locus.05800 | 3 | 17,111,250 | 17,112,194 | 9  | 0 | 19 | yes | TE |
| at_locus.05801 | 3 | 17,118,197 | 17,119,069 | 6  | 0 | 1  | no  | TE |
| at_locus.05802 | 3 | 17,120,728 | 17,120,763 | 4  | 0 | 0  | no  | TE |
| at_locus.05803 | 3 | 17,125,693 | 17,126,035 | 0  | 0 | 4  | no  | TE |
| at_locus.05804 | 3 | 17,128,235 | 17,128,764 | 5  | 0 | 0  | yes | TE |
| at_locus.05805 | 3 | 17,152,592 | 17,152,799 | 6  | 0 | 1  | yes | TE |
| at_locus.05806 | 3 | 17,153,434 | 17,153,676 | 17 | 0 | 0  | no  | TE |
| at_locus.05807 | 3 | 17,154,114 | 17,154,798 | 28 | 0 | 1  | no  | TE |
| at_locus.05808 | 3 | 17,155,390 | 17,155,475 | 16 | 0 | 0  | no  | TE |
| at_locus.05809 | 3 | 17,155,800 | 17,156,160 | 23 | 0 | 19 | yes |    |
| at_locus.05810 | 3 | 17,158,212 | 17,158,395 | 5  | 0 | 0  | yes |    |

|                |   |            |            |    |   |    |     |    |
|----------------|---|------------|------------|----|---|----|-----|----|
| at_locus.05811 | 3 | 17,188,050 | 17,188,487 | 9  | 0 | 0  | yes |    |
| at_locus.05812 | 3 | 17,213,827 | 17,214,068 | 54 | 2 | 4  | yes | TE |
| at_locus.05813 | 3 | 17,214,758 | 17,214,910 | 19 | 0 | 0  | no  | TE |
| at_locus.05814 | 3 | 17,216,352 | 17,216,390 | 7  | 2 | 0  | yes | TE |
| at_locus.05815 | 3 | 17,216,883 | 17,216,991 | 8  | 0 | 0  | yes | TE |
| at_locus.05816 | 3 | 17,220,654 | 17,220,691 | 6  | 0 | 0  | no  | TE |
| at_locus.05817 | 3 | 17,260,530 | 17,260,715 | 29 | 0 | 0  | yes |    |
| at_locus.05818 | 3 | 17,271,793 | 17,271,955 | 4  | 0 | 0  | yes |    |
| at_locus.05819 | 3 | 17,272,223 | 17,272,387 | 14 | 0 | 0  | yes |    |
| at_locus.05820 | 3 | 17,283,608 | 17,284,200 | 11 | 1 | 22 | yes |    |
| at_locus.05821 | 3 | 17,286,730 | 17,288,034 | 54 | 4 | 0  | no  | TE |
| at_locus.05822 | 3 | 17,288,714 | 17,288,799 | 12 | 0 | 0  | no  | TE |
| at_locus.05823 | 3 | 17,310,137 | 17,311,007 | 51 | 2 | 1  | no  | TE |
| at_locus.05824 | 3 | 17,311,233 | 17,311,571 | 12 | 2 | 0  | no  | TE |
| at_locus.05825 | 3 | 17,312,178 | 17,312,263 | 12 | 0 | 0  | no  | TE |
| at_locus.05826 | 3 | 17,373,964 | 17,374,951 | 34 | 3 | 17 | yes | TE |
| at_locus.05827 | 3 | 17,375,415 | 17,376,359 | 26 | 0 | 14 | no  | TE |
| at_locus.05828 | 3 | 17,377,249 | 17,377,805 | 13 | 1 | 10 | no  | TE |
| at_locus.05829 | 3 | 17,378,329 | 17,379,218 | 53 | 3 | 10 | yes | TE |
| at_locus.05830 | 3 | 17,393,439 | 17,394,291 | 41 | 0 | 3  | no  | TE |
| at_locus.05831 | 3 | 17,394,471 | 17,394,652 | 11 | 0 | 0  | no  | TE |
| at_locus.05832 | 3 | 17,403,460 | 17,404,264 | 16 | 0 | 8  | yes | TE |
| at_locus.05833 | 3 | 17,404,815 | 17,405,708 | 14 | 0 | 12 | yes | TE |
| at_locus.05834 | 3 | 17,407,190 | 17,407,551 | 6  | 0 | 0  | yes | TE |
| at_locus.05835 | 3 | 17,407,919 | 17,408,285 | 18 | 0 | 0  | no  | TE |
| at_locus.05836 | 3 | 17,412,982 | 17,414,432 | 69 | 1 | 25 | yes | TE |
| at_locus.05837 | 3 | 17,414,980 | 17,415,108 | 5  | 0 | 4  | no  | TE |
| at_locus.05838 | 3 | 17,415,854 | 17,416,301 | 2  | 0 | 5  | yes | TE |
| at_locus.05839 | 3 | 17,416,607 | 17,417,157 | 4  | 0 | 2  | yes | TE |
| at_locus.05840 | 3 | 17,417,972 | 17,418,313 | 8  | 1 | 3  | no  | TE |
| at_locus.05841 | 3 | 17,418,577 | 17,419,337 | 6  | 0 | 5  | no  | TE |
| at_locus.05842 | 3 | 17,419,487 | 17,419,814 | 8  | 0 | 1  | no  | TE |
| at_locus.05843 | 3 | 17,421,979 | 17,423,303 | 8  | 0 | 8  | no  | TE |
| at_locus.05844 | 3 | 17,423,552 | 17,424,064 | 8  | 0 | 1  | yes | TE |
| at_locus.05845 | 3 | 17,424,484 | 17,424,513 | 1  | 0 | 4  | no  | TE |
| at_locus.05846 | 3 | 17,424,955 | 17,425,253 | 5  | 0 | 0  | yes | TE |
| at_locus.05847 | 3 | 17,426,260 | 17,426,521 | 4  | 0 | 2  | no  | TE |

|                |   |            |            |    |    |    |     |    |
|----------------|---|------------|------------|----|----|----|-----|----|
| at_locus.05848 | 3 | 17,428,085 | 17,428,441 | 7  | 0  | 2  | no  | TE |
| at_locus.05849 | 3 | 17,428,654 | 17,428,951 | 13 | 0  | 18 | yes | TE |
| at_locus.05850 | 3 | 17,429,800 | 17,430,000 | 11 | 0  | 2  | yes | TE |
| at_locus.05851 | 3 | 17,440,640 | 17,440,932 | 8  | 0  | 6  | yes | TE |
| at_locus.05852 | 3 | 17,441,211 | 17,441,674 | 2  | 0  | 5  | no  | TE |
| at_locus.05853 | 3 | 17,442,519 | 17,443,023 | 5  | 0  | 1  | no  | TE |
| at_locus.05854 | 3 | 17,443,898 | 17,444,057 | 5  | 0  | 0  | no  | TE |
| at_locus.05855 | 3 | 17,444,105 | 17,444,825 | 4  | 0  | 10 | no  | TE |
| at_locus.05856 | 3 | 17,446,510 | 17,447,189 | 4  | 1  | 6  | no  | TE |
| at_locus.05858 | 3 | 17,458,916 | 17,459,083 | 7  | 0  | 0  | yes |    |
| at_locus.05859 | 3 | 17,480,790 | 17,481,402 | 45 | 0  | 1  | no  | TE |
| at_locus.05860 | 3 | 17,481,679 | 17,482,002 | 8  | 0  | 0  | no  | TE |
| at_locus.05861 | 3 | 17,527,668 | 17,527,725 | 4  | 0  | 0  | no  |    |
| at_locus.05862 | 3 | 17,531,455 | 17,531,493 | 4  | 0  | 0  | yes |    |
| at_locus.05863 | 3 | 17,591,041 | 17,591,481 | 8  | 0  | 2  | yes | TE |
| at_locus.05864 | 3 | 17,667,354 | 17,667,561 | 18 | 0  | 0  | yes |    |
| at_locus.05865 | 3 | 17,669,710 | 17,669,888 | 11 | 0  | 0  | yes | TE |
| at_locus.05866 | 3 | 17,694,750 | 17,694,821 | 4  | 0  | 0  | yes |    |
| at_locus.05867 | 3 | 17,739,559 | 17,739,985 | 57 | 27 | 47 | yes |    |
| at_locus.05868 | 3 | 17,741,376 | 17,741,686 | 42 | 2  | 2  | no  | TE |
| at_locus.05869 | 3 | 17,741,923 | 17,742,219 | 8  | 0  | 0  | yes | TE |
| at_locus.05870 | 3 | 17,786,614 | 17,786,846 | 9  | 1  | 1  | yes | TE |
| at_locus.05871 | 3 | 17,787,774 | 17,788,007 | 6  | 0  | 0  | no  | TE |
| at_locus.05872 | 3 | 17,788,249 | 17,788,931 | 27 | 0  | 2  | yes | TE |
| at_locus.05873 | 3 | 17,853,318 | 17,854,117 | 65 | 1  | 46 | yes |    |
| at_locus.05874 | 3 | 17,873,457 | 17,873,845 | 8  | 3  | 1  | yes |    |
| at_locus.05876 | 3 | 17,989,550 | 17,989,872 | 6  | 0  | 1  | yes | TE |
| at_locus.05877 | 3 | 18,025,904 | 18,025,971 | 4  | 0  | 0  | yes |    |
| at_locus.05878 | 3 | 18,029,766 | 18,030,313 | 20 | 0  | 1  | yes | TE |
| at_locus.05879 | 3 | 18,030,536 | 18,030,910 | 25 | 4  | 0  | no  | TE |
| at_locus.05880 | 3 | 18,058,455 | 18,058,719 | 8  | 0  | 0  | yes | TE |
| at_locus.05881 | 3 | 18,066,854 | 18,066,948 | 4  | 0  | 0  | no  | TE |
| at_locus.05882 | 3 | 18,070,709 | 18,070,803 | 4  | 0  | 0  | no  | TE |
| at_locus.05883 | 3 | 18,073,362 | 18,073,738 | 16 | 0  | 0  | no  |    |
| at_locus.05884 | 3 | 18,080,417 | 18,081,386 | 30 | 0  | 0  | yes |    |
| at_locus.05885 | 3 | 18,098,208 | 18,098,656 | 10 | 0  | 1  | yes |    |
| at_locus.05886 | 3 | 18,121,384 | 18,122,424 | 17 | 0  | 2  | yes | TE |

|                |   |            |            |     |   |    |     |    |
|----------------|---|------------|------------|-----|---|----|-----|----|
| at_locus.05887 | 3 | 18,122,746 | 18,122,950 | 7   | 0 | 0  | no  | TE |
| at_locus.05888 | 3 | 18,123,367 | 18,123,423 | 4   | 0 | 1  | no  | TE |
| at_locus.05889 | 3 | 18,157,829 | 18,158,063 | 8   | 0 | 1  | yes | TE |
| at_locus.05890 | 3 | 18,182,026 | 18,182,177 | 16  | 0 | 0  | no  | TE |
| at_locus.05891 | 3 | 18,183,358 | 18,183,775 | 18  | 0 | 0  | yes | TE |
| at_locus.05892 | 3 | 18,254,649 | 18,254,966 | 25  | 0 | 3  | yes | TE |
| at_locus.05893 | 3 | 18,266,096 | 18,266,319 | 7   | 0 | 0  | yes |    |
| at_locus.05894 | 3 | 18,307,322 | 18,307,346 | 5   | 0 | 0  | no  |    |
| at_locus.05895 | 3 | 18,319,654 | 18,320,144 | 15  | 0 | 0  | yes | TE |
| at_locus.05896 | 3 | 18,320,966 | 18,321,055 | 4   | 1 | 0  | yes | TE |
| at_locus.05897 | 3 | 18,350,678 | 18,350,774 | 4   | 0 | 0  | yes |    |
| at_locus.05898 | 3 | 18,368,304 | 18,368,818 | 20  | 2 | 7  | yes | TE |
| at_locus.05899 | 3 | 18,423,139 | 18,424,157 | 59  | 4 | 1  | no  | TE |
| at_locus.05900 | 3 | 18,469,691 | 18,469,716 | 4   | 0 | 0  | no  | TE |
| at_locus.05901 | 3 | 18,554,474 | 18,555,999 | 103 | 1 | 91 | yes |    |
| at_locus.05902 | 3 | 18,556,313 | 18,557,079 | 150 | 4 | 43 | yes |    |
| at_locus.05903 | 3 | 18,580,474 | 18,580,629 | 8   | 1 | 0  | yes |    |
| at_locus.05904 | 3 | 18,596,188 | 18,596,256 | 4   | 0 | 1  | yes |    |
| at_locus.05905 | 3 | 18,642,157 | 18,642,929 | 25  | 0 | 11 | no  | TE |
| at_locus.05906 | 3 | 18,645,022 | 18,645,467 | 20  | 1 | 0  | yes | TE |
| at_locus.05907 | 3 | 18,663,918 | 18,664,098 | 15  | 0 | 0  | yes | TE |
| at_locus.05908 | 3 | 18,664,706 | 18,665,000 | 4   | 0 | 4  | yes |    |
| at_locus.05909 | 3 | 18,745,228 | 18,745,975 | 84  | 4 | 11 | no  | TE |
| at_locus.05910 | 3 | 18,746,625 | 18,747,099 | 20  | 1 | 7  | no  | TE |
| at_locus.05911 | 3 | 18,747,749 | 18,749,012 | 57  | 0 | 19 | no  | TE |
| at_locus.05912 | 3 | 18,749,385 | 18,750,774 | 86  | 4 | 24 | yes | TE |
| at_locus.05913 | 3 | 18,802,103 | 18,802,233 | 4   | 0 | 0  | yes | TE |
| at_locus.05914 | 3 | 18,802,472 | 18,802,657 | 4   | 0 | 0  | yes | TE |
| at_locus.05915 | 3 | 18,807,156 | 18,807,263 | 4   | 0 | 0  | yes |    |
| at_locus.05916 | 3 | 18,810,551 | 18,810,840 | 7   | 0 | 0  | yes |    |
| at_locus.05917 | 3 | 18,823,208 | 18,823,624 | 10  | 0 | 27 | yes | TE |
| at_locus.05918 | 3 | 18,824,442 | 18,824,847 | 24  | 1 | 0  | yes |    |
| at_locus.05919 | 3 | 18,854,566 | 18,855,011 | 45  | 0 | 1  | no  | TE |
| at_locus.05920 | 3 | 18,855,337 | 18,855,574 | 10  | 0 | 0  | no  | TE |
| at_locus.05921 | 3 | 18,861,961 | 18,861,981 | 0   | 1 | 7  | no  |    |
| at_locus.05922 | 3 | 18,871,051 | 18,871,301 | 8   | 0 | 0  | yes | TE |
| at_locus.05923 | 3 | 18,871,976 | 18,872,137 | 5   | 2 | 1  | no  | TE |

|                |   |            |            |    |    |    |     |    |
|----------------|---|------------|------------|----|----|----|-----|----|
| at_locus.05924 | 3 | 18,884,586 | 18,884,893 | 30 | 0  | 0  | yes |    |
| at_locus.05925 | 3 | 18,897,714 | 18,897,937 | 5  | 0  | 0  | no  | TE |
| at_locus.05926 | 3 | 18,898,416 | 18,898,614 | 6  | 1  | 0  | yes | TE |
| at_locus.05928 | 3 | 18,938,246 | 18,938,343 | 4  | 0  | 0  | no  | TE |
| at_locus.05929 | 3 | 18,938,906 | 18,939,694 | 27 | 0  | 0  | no  |    |
| at_locus.05930 | 3 | 18,959,801 | 18,959,829 | 4  | 0  | 0  | no  | TE |
| at_locus.05931 | 3 | 18,987,737 | 18,988,085 | 7  | 0  | 1  | yes | TE |
| at_locus.05932 | 3 | 19,084,431 | 19,084,533 | 14 | 31 | 35 | yes |    |
| at_locus.05933 | 3 | 19,144,634 | 19,145,329 | 21 | 2  | 2  | no  | TE |
| at_locus.05934 | 3 | 19,145,604 | 19,145,843 | 5  | 0  | 3  | yes | TE |
| at_locus.05935 | 3 | 19,163,680 | 19,163,740 | 5  | 0  | 1  | yes |    |
| at_locus.05936 | 3 | 19,168,768 | 19,168,825 | 4  | 0  | 1  | no  |    |
| at_locus.05937 | 3 | 19,189,450 | 19,189,664 | 7  | 0  | 1  | yes | TE |
| at_locus.05938 | 3 | 19,189,894 | 19,189,943 | 6  | 0  | 0  | yes | TE |
| at_locus.05939 | 3 | 19,253,920 | 19,254,179 | 16 | 0  | 1  | yes |    |
| at_locus.05940 | 3 | 19,254,581 | 19,254,707 | 16 | 0  | 0  | yes |    |
| at_locus.05941 | 3 | 19,313,011 | 19,313,026 | 5  | 15 | 8  | no  |    |
| at_locus.05942 | 3 | 19,402,973 | 19,403,336 | 13 | 0  | 2  | yes |    |
| at_locus.05943 | 3 | 19,439,014 | 19,439,271 | 6  | 0  | 0  | no  | TE |
| at_locus.05944 | 3 | 19,439,857 | 19,440,177 | 8  | 0  | 1  | yes | TE |
| at_locus.05945 | 3 | 19,447,896 | 19,448,314 | 25 | 1  | 0  | yes | TE |
| at_locus.05946 | 3 | 19,482,424 | 19,482,600 | 9  | 1  | 4  | yes |    |
| at_locus.05947 | 3 | 19,516,896 | 19,517,228 | 0  | 0  | 5  | yes |    |
| at_locus.05948 | 3 | 19,531,668 | 19,532,108 | 21 | 0  | 2  | no  | TE |
| at_locus.05949 | 3 | 19,540,003 | 19,540,030 | 4  | 0  | 0  | no  | TE |
| at_locus.05950 | 3 | 19,548,730 | 19,548,792 | 6  | 0  | 0  | no  | TE |
| at_locus.05951 | 3 | 19,571,735 | 19,571,994 | 6  | 0  | 4  | yes |    |
| at_locus.05952 | 3 | 19,589,182 | 19,589,222 | 4  | 0  | 0  | no  |    |
| at_locus.05953 | 3 | 19,633,254 | 19,633,590 | 74 | 0  | 1  | yes | TE |
| at_locus.05954 | 3 | 19,659,146 | 19,659,443 | 5  | 0  | 1  | no  |    |
| at_locus.05955 | 3 | 19,670,283 | 19,670,587 | 9  | 16 | 5  | yes |    |
| at_locus.05956 | 3 | 19,750,737 | 19,751,316 | 31 | 1  | 1  | yes | TE |
| at_locus.05957 | 3 | 19,764,822 | 19,764,960 | 4  | 0  | 0  | yes | TE |
| at_locus.05958 | 3 | 19,776,224 | 19,776,294 | 5  | 0  | 1  | no  | TE |
| at_locus.05959 | 3 | 19,877,938 | 19,877,960 | 4  | 0  | 0  | yes |    |
| at_locus.05960 | 3 | 19,970,819 | 19,971,161 | 5  | 0  | 6  | yes |    |
| at_locus.05961 | 3 | 20,035,475 | 20,035,604 | 6  | 0  | 0  | yes |    |

|                |   |            |            |     |     |     |     |    |
|----------------|---|------------|------------|-----|-----|-----|-----|----|
| at_locus.05962 | 3 | 20,041,380 | 20,041,741 | 5   | 0   | 4   | yes |    |
| at_locus.05963 | 3 | 20,041,864 | 20,043,571 | 460 | 7   | 316 | yes |    |
| at_locus.05964 | 3 | 20,101,592 | 20,101,799 | 10  | 2   | 0   | yes |    |
| at_locus.05965 | 3 | 20,199,513 | 20,199,787 | 7   | 0   | 0   | yes | TE |
| at_locus.05966 | 3 | 20,200,242 | 20,200,315 | 4   | 0   | 1   | no  | TE |
| at_locus.05967 | 3 | 20,213,256 | 20,214,251 | 7   | 0   | 4   | yes |    |
| at_locus.05968 | 3 | 20,217,663 | 20,218,703 | 5   | 0   | 7   | yes |    |
| at_locus.05969 | 3 | 20,244,657 | 20,245,564 | 25  | 0   | 4   | no  | TE |
| at_locus.05970 | 3 | 20,315,671 | 20,315,852 | 4   | 0   | 0   | yes | TE |
| at_locus.05971 | 3 | 20,341,201 | 20,341,352 | 7   | 0   | 0   | yes |    |
| at_locus.05972 | 3 | 20,360,423 | 20,360,813 | 11  | 0   | 1   | yes |    |
| at_locus.05973 | 3 | 20,493,440 | 20,493,535 | 8   | 0   | 0   | no  |    |
| at_locus.05974 | 3 | 20,495,120 | 20,495,412 | 8   | 2   | 1   | no  | TE |
| at_locus.05975 | 3 | 20,495,888 | 20,496,071 | 8   | 0   | 0   | no  | TE |
| at_locus.05976 | 3 | 20,496,723 | 20,497,084 | 6   | 0   | 0   | no  | TE |
| at_locus.05977 | 3 | 20,497,900 | 20,498,119 | 10  | 0   | 0   | no  | TE |
| at_locus.05978 | 3 | 20,499,182 | 20,499,214 | 7   | 0   | 0   | no  |    |
| at_locus.05979 | 3 | 20,550,493 | 20,551,102 | 24  | 1   | 12  | yes |    |
| at_locus.05980 | 3 | 20,585,169 | 20,585,241 | 4   | 0   | 3   | yes |    |
| at_locus.05981 | 3 | 20,598,900 | 20,598,990 | 27  | 50  | 138 | yes |    |
| at_locus.05982 | 3 | 20,630,563 | 20,630,594 | 10  | 15  | 3   | no  |    |
| at_locus.05983 | 3 | 20,640,749 | 20,640,865 | 9   | 0   | 0   | yes |    |
| at_locus.05984 | 3 | 20,653,851 | 20,653,969 | 3   | 3   | 5   | yes |    |
| at_locus.05985 | 3 | 20,665,772 | 20,665,879 | 0   | 0   | 4   | no  | TE |
| at_locus.05986 | 3 | 20,666,086 | 20,666,745 | 8   | 0   | 0   | yes | TE |
| at_locus.05987 | 3 | 20,668,053 | 20,668,616 | 6   | 0   | 2   | no  | TE |
| at_locus.05988 | 3 | 20,702,636 | 20,702,777 | 41  | 118 | 83  | yes |    |
| at_locus.05989 | 3 | 20,736,733 | 20,736,864 | 3   | 5   | 4   | yes |    |
| at_locus.05990 | 3 | 20,737,094 | 20,737,253 | 9   | 0   | 1   | yes | TE |
| at_locus.05991 | 3 | 20,738,176 | 20,738,443 | 4   | 0   | 0   | yes | TE |
| at_locus.05992 | 3 | 20,757,357 | 20,757,524 | 71  | 0   | 0   | no  |    |
| at_locus.05993 | 3 | 20,762,451 | 20,762,733 | 4   | 0   | 2   | yes |    |
| at_locus.05994 | 3 | 20,774,782 | 20,774,961 | 7   | 0   | 0   | yes |    |
| at_locus.05995 | 3 | 20,780,574 | 20,780,718 | 18  | 0   | 0   | no  | TE |
| at_locus.05996 | 3 | 20,781,414 | 20,781,441 | 4   | 0   | 0   | no  | TE |
| at_locus.05997 | 3 | 20,798,069 | 20,798,319 | 8   | 2   | 0   | no  | TE |
| at_locus.05998 | 3 | 20,798,586 | 20,799,304 | 55  | 1   | 2   | no  | TE |



|                |   |            |            |    |   |    |     |    |
|----------------|---|------------|------------|----|---|----|-----|----|
| at_locus.05999 | 3 | 20,801,820 | 20,802,035 | 1  | 4 | 0  | yes |    |
| at_locus.06000 | 3 | 20,819,820 | 20,820,328 | 16 | 0 | 18 | yes |    |
| at_locus.06001 | 3 | 20,886,618 | 20,886,666 | 6  | 0 | 1  | no  | TE |
| at_locus.06002 | 3 | 20,940,635 | 20,940,832 | 9  | 1 | 6  | yes |    |
| at_locus.06003 | 3 | 20,968,730 | 20,968,913 | 7  | 0 | 2  | yes | TE |
| at_locus.06004 | 3 | 21,000,792 | 21,001,257 | 5  | 0 | 2  | yes |    |
| at_locus.06005 | 3 | 21,001,759 | 21,002,086 | 9  | 0 | 0  | no  | TE |
| at_locus.06006 | 3 | 21,010,128 | 21,010,178 | 7  | 0 | 0  | yes | TE |
| at_locus.06008 | 3 | 21,037,485 | 21,037,517 | 11 | 0 | 0  | no  |    |
| at_locus.06010 | 3 | 21,191,516 | 21,191,536 | 7  | 2 | 2  | yes |    |
| at_locus.06011 | 3 | 21,288,311 | 21,288,355 | 48 | 1 | 0  | yes |    |
| at_locus.06012 | 3 | 21,335,660 | 21,335,838 | 10 | 0 | 0  | yes | TE |
| at_locus.06015 | 3 | 21,520,600 | 21,520,763 | 8  | 0 | 7  | yes |    |
| at_locus.06016 | 3 | 21,558,555 | 21,558,628 | 8  | 0 | 0  | yes |    |
| at_locus.06017 | 3 | 21,563,076 | 21,563,360 | 16 | 0 | 0  | no  | TE |
| at_locus.06019 | 3 | 21,705,211 | 21,705,394 | 28 | 0 | 0  | no  | TE |
| at_locus.06020 | 3 | 21,979,387 | 21,980,304 | 16 | 1 | 10 | yes |    |
| at_locus.06021 | 3 | 22,013,974 | 22,014,010 | 5  | 0 | 0  | no  |    |
| at_locus.06022 | 3 | 22,065,729 | 22,065,859 | 0  | 3 | 8  | yes |    |
| at_locus.06023 | 3 | 22,070,584 | 22,070,914 | 47 | 0 | 1  | no  | TE |
| at_locus.06024 | 3 | 22,071,164 | 22,071,653 | 4  | 0 | 2  | no  | TE |
| at_locus.06025 | 3 | 22,072,553 | 22,072,920 | 5  | 0 | 1  | no  | TE |
| at_locus.06026 | 3 | 22,073,402 | 22,073,545 | 2  | 0 | 4  | no  | TE |
| at_locus.06027 | 3 | 22,074,285 | 22,075,269 | 58 | 0 | 3  | no  | TE |
| at_locus.06028 | 3 | 22,124,031 | 22,124,621 | 13 | 0 | 0  | yes | TE |
| at_locus.06029 | 3 | 22,125,170 | 22,125,920 | 17 | 1 | 19 | yes | TE |
| at_locus.06030 | 3 | 22,126,119 | 22,126,714 | 7  | 0 | 0  | yes | TE |
| at_locus.06031 | 3 | 22,130,261 | 22,130,573 | 6  | 0 | 0  | no  | TE |
| at_locus.06032 | 3 | 22,130,794 | 22,130,970 | 18 | 0 | 0  | no  | TE |
| at_locus.06033 | 3 | 22,131,199 | 22,131,412 | 13 | 1 | 0  | no  | TE |
| at_locus.06034 | 3 | 22,184,820 | 22,185,007 | 4  | 0 | 1  | yes |    |
| at_locus.06035 | 3 | 22,248,574 | 22,248,700 | 15 | 0 | 5  | no  | TE |
| at_locus.06036 | 3 | 22,252,526 | 22,252,672 | 1  | 3 | 5  | no  |    |
| at_locus.06037 | 3 | 22,252,918 | 22,253,044 | 15 | 0 | 5  | no  | TE |
| at_locus.06038 | 3 | 22,381,249 | 22,381,622 | 10 | 0 | 0  | yes |    |
| at_locus.06039 | 3 | 22,383,067 | 22,383,921 | 9  | 0 | 2  | yes |    |
| at_locus.06040 | 3 | 22,389,225 | 22,389,255 | 14 | 0 | 0  | yes |    |

|                |   |            |            |     |     |     |     |    |
|----------------|---|------------|------------|-----|-----|-----|-----|----|
| at_locus.06041 | 3 | 22,396,601 | 22,396,795 | 17  | 1   | 1   | no  |    |
| at_locus.06042 | 3 | 22,399,263 | 22,399,291 | 5   | 0   | 0   | no  | TE |
| at_locus.06043 | 3 | 22,401,011 | 22,401,205 | 17  | 1   | 1   | no  |    |
| at_locus.06044 | 3 | 22,402,189 | 22,402,238 | 4   | 0   | 0   | yes |    |
| at_locus.06045 | 3 | 22,422,468 | 22,422,539 | 14  | 24  | 26  | yes |    |
| at_locus.06046 | 3 | 22,544,252 | 22,544,711 | 6   | 0   | 5   | no  | TE |
| at_locus.06047 | 3 | 22,579,898 | 22,580,378 | 6   | 0   | 1   | no  |    |
| at_locus.06048 | 3 | 22,671,355 | 22,671,426 | 4   | 0   | 0   | yes | TE |
| at_locus.06049 | 3 | 22,671,645 | 22,671,743 | 9   | 0   | 1   | no  |    |
| at_locus.06050 | 3 | 22,672,523 | 22,672,564 | 4   | 0   | 1   | no  | TE |
| at_locus.06051 | 3 | 22,673,165 | 22,673,275 | 5   | 0   | 1   | no  |    |
| at_locus.06052 | 3 | 22,706,578 | 22,707,247 | 57  | 0   | 2   | no  | TE |
| at_locus.06053 | 3 | 22,709,088 | 22,709,455 | 5   | 0   | 1   | no  | TE |
| at_locus.06054 | 3 | 22,710,284 | 22,710,329 | 0   | 0   | 6   | no  | TE |
| at_locus.06055 | 3 | 22,710,355 | 22,710,844 | 4   | 0   | 2   | no  | TE |
| at_locus.06056 | 3 | 22,711,094 | 22,711,424 | 54  | 0   | 1   | no  | TE |
| at_locus.06057 | 3 | 22,758,948 | 22,759,177 | 5   | 0   | 7   | yes |    |
| at_locus.06058 | 3 | 22,778,171 | 22,778,546 | 7   | 1   | 3   | yes | TE |
| at_locus.06060 | 3 | 22,801,372 | 22,801,485 | 25  | 0   | 0   | yes | TE |
| at_locus.06061 | 3 | 22,933,002 | 22,933,297 | 81  | 450 | 189 | yes |    |
| at_locus.06062 | 3 | 22,943,019 | 22,943,110 | 4   | 0   | 0   | yes |    |
| at_locus.06064 | 3 | 23,096,557 | 23,097,030 | 26  | 1   | 1   | no  | TE |
| at_locus.06065 | 3 | 23,119,875 | 23,120,029 | 4   | 1   | 1   | yes | TE |
| at_locus.06066 | 3 | 23,121,402 | 23,121,666 | 4   | 0   | 0   | yes | TE |
| at_locus.06067 | 3 | 23,126,345 | 23,126,799 | 12  | 1   | 2   | yes | TE |
| at_locus.06068 | 3 | 23,128,374 | 23,128,511 | 4   | 0   | 2   | yes |    |
| at_locus.06070 | 3 | 23,417,152 | 23,417,241 | 87  | 281 | 140 | yes |    |
| at_locus.06072 | 4 | 41,669     | 41,708     | 9   | 0   | 0   | yes | TE |
| at_locus.06073 | 4 | 50,432     | 50,461     | 11  | 0   | 2   | no  | TE |
| at_locus.06074 | 4 | 50,880     | 52,162     | 14  | 1   | 21  | no  | TE |
| at_locus.06075 | 4 | 58,191     | 58,431     | 14  | 23  | 27  | yes |    |
| at_locus.06076 | 4 | 68,743     | 68,848     | 4   | 0   | 0   | yes | TE |
| at_locus.06077 | 4 | 77,116     | 77,609     | 17  | 0   | 1   | yes |    |
| at_locus.06078 | 4 | 79,927     | 80,041     | 9   | 0   | 1   | yes | TE |
| at_locus.06079 | 4 | 179,017    | 179,188    | 4   | 0   | 0   | yes |    |
| at_locus.06080 | 4 | 236,683    | 236,863    | 12  | 0   | 3   | yes |    |
| at_locus.06081 | 4 | 272,722    | 273,226    | 188 | 2   | 111 | yes | TE |

|                |   |         |         |    |    |    |     |    |
|----------------|---|---------|---------|----|----|----|-----|----|
| at_locus.06082 | 4 | 273,655 | 273,875 | 5  | 0  | 1  | yes |    |
| at_locus.06083 | 4 | 297,963 | 298,018 | 9  | 0  | 1  | yes | TE |
| at_locus.06084 | 4 | 298,252 | 298,785 | 13 | 0  | 1  | yes | TE |
| at_locus.06085 | 4 | 312,675 | 312,713 | 5  | 0  | 1  | yes | TE |
| at_locus.06086 | 4 | 313,098 | 313,673 | 15 | 0  | 1  | no  | TE |
| at_locus.06087 | 4 | 314,184 | 314,261 | 9  | 0  | 0  | no  | TE |
| at_locus.06088 | 4 | 369,855 | 370,101 | 9  | 96 | 52 | yes |    |
| at_locus.06089 | 4 | 371,057 | 371,606 | 21 | 0  | 1  | no  | TE |
| at_locus.06090 | 4 | 371,870 | 372,086 | 11 | 0  | 0  | no  | TE |
| at_locus.06091 | 4 | 375,892 | 375,982 | 4  | 0  | 0  | yes | TE |
| at_locus.06092 | 4 | 378,851 | 379,052 | 12 | 0  | 0  | no  |    |
| at_locus.06093 | 4 | 379,307 | 379,361 | 39 | 0  | 0  | no  |    |
| at_locus.06094 | 4 | 410,957 | 410,997 | 15 | 0  | 0  | yes |    |
| at_locus.06095 | 4 | 413,958 | 413,996 | 4  | 0  | 0  | no  |    |
| at_locus.06096 | 4 | 418,090 | 418,127 | 5  | 0  | 0  | no  | TE |
| at_locus.06097 | 4 | 422,085 | 422,193 | 1  | 4  | 0  | no  |    |
| at_locus.06098 | 4 | 425,397 | 425,454 | 5  | 1  | 0  | yes | TE |
| at_locus.06099 | 4 | 434,325 | 434,473 | 6  | 0  | 0  | yes |    |
| at_locus.06100 | 4 | 489,743 | 490,019 | 2  | 0  | 6  | yes |    |
| at_locus.06101 | 4 | 521,751 | 521,976 | 5  | 0  | 1  | yes |    |
| at_locus.06102 | 4 | 572,601 | 572,759 | 4  | 0  | 0  | no  | TE |
| at_locus.06103 | 4 | 581,849 | 581,981 | 14 | 0  | 0  | yes |    |
| at_locus.06104 | 4 | 595,313 | 595,515 | 9  | 0  | 0  | yes |    |
| at_locus.06105 | 4 | 618,058 | 618,433 | 5  | 1  | 1  | yes | TE |
| at_locus.06106 | 4 | 630,812 | 630,916 | 7  | 0  | 0  | yes |    |
| at_locus.06107 | 4 | 636,750 | 636,820 | 7  | 0  | 0  | yes | TE |
| at_locus.06108 | 4 | 650,300 | 650,506 | 5  | 0  | 1  | yes |    |
| at_locus.06109 | 4 | 667,548 | 667,781 | 5  | 0  | 1  | yes |    |
| at_locus.06110 | 4 | 683,213 | 683,762 | 10 | 0  | 1  | yes | TE |
| at_locus.06111 | 4 | 684,066 | 684,356 | 10 | 0  | 1  | no  | TE |
| at_locus.06112 | 4 | 697,458 | 697,779 | 14 | 0  | 1  | yes | TE |
| at_locus.06113 | 4 | 698,675 | 698,810 | 7  | 0  | 0  | yes | TE |
| at_locus.06114 | 4 | 743,271 | 743,397 | 4  | 0  | 0  | yes |    |
| at_locus.06115 | 4 | 764,195 | 764,422 | 20 | 1  | 0  | yes | TE |
| at_locus.06117 | 4 | 815,287 | 815,402 | 0  | 8  | 7  | no  |    |
| at_locus.06118 | 4 | 823,588 | 823,633 | 13 | 0  | 0  | no  | TE |
| at_locus.06119 | 4 | 823,965 | 824,018 | 6  | 0  | 0  | no  | TE |

|                |   |           |           |    |   |    |     |    |
|----------------|---|-----------|-----------|----|---|----|-----|----|
| at_locus.06120 | 4 | 848,768   | 848,973   | 4  | 0 | 0  | yes |    |
| at_locus.06121 | 4 | 862,430   | 862,677   | 0  | 0 | 8  | yes |    |
| at_locus.06122 | 4 | 869,240   | 869,503   | 4  | 0 | 1  | yes |    |
| at_locus.06123 | 4 | 875,669   | 875,973   | 11 | 0 | 1  | no  |    |
| at_locus.06124 | 4 | 876,573   | 876,598   | 5  | 0 | 1  | yes | TE |
| at_locus.06125 | 4 | 929,466   | 929,708   | 9  | 0 | 0  | yes | TE |
| at_locus.06126 | 4 | 934,472   | 934,511   | 4  | 0 | 0  | yes |    |
| at_locus.06127 | 4 | 941,710   | 941,747   | 1  | 0 | 0  | no  |    |
| at_locus.06128 | 4 | 963,676   | 963,883   | 35 | 3 | 0  | no  | TE |
| at_locus.06129 | 4 | 964,167   | 964,505   | 5  | 0 | 0  | no  | TE |
| at_locus.06130 | 4 | 964,745   | 965,279   | 36 | 0 | 1  | no  | TE |
| at_locus.06131 | 4 | 965,547   | 965,624   | 6  | 0 | 0  | yes | TE |
| at_locus.06132 | 4 | 983,186   | 983,347   | 6  | 0 | 0  | yes |    |
| at_locus.06133 | 4 | 993,767   | 993,984   | 21 | 0 | 0  | no  |    |
| at_locus.06134 | 4 | 999,922   | 1,000,760 | 78 | 6 | 1  | no  | TE |
| at_locus.06135 | 4 | 1,000,987 | 1,001,297 | 8  | 0 | 0  | yes | TE |
| at_locus.06136 | 4 | 1,001,939 | 1,002,007 | 5  | 0 | 0  | no  | TE |
| at_locus.06137 | 4 | 1,018,798 | 1,019,114 | 3  | 0 | 0  | no  | TE |
| at_locus.06138 | 4 | 1,019,408 | 1,019,841 | 2  | 0 | 5  | no  | TE |
| at_locus.06139 | 4 | 1,020,211 | 1,020,514 | 1  | 0 | 5  | no  | TE |
| at_locus.06140 | 4 | 1,021,053 | 1,021,265 | 2  | 0 | 4  | no  | TE |
| at_locus.06141 | 4 | 1,026,901 | 1,027,360 | 19 | 0 | 21 | yes | TE |
| at_locus.06142 | 4 | 1,063,638 | 1,063,716 | 44 | 0 | 0  | no  |    |
| at_locus.06143 | 4 | 1,063,947 | 1,064,181 | 12 | 0 | 0  | yes |    |
| at_locus.06144 | 4 | 1,090,886 | 1,091,907 | 29 | 0 | 15 | yes | TE |
| at_locus.06145 | 4 | 1,098,067 | 1,098,303 | 4  | 0 | 0  | no  |    |
| at_locus.06146 | 4 | 1,116,622 | 1,116,913 | 25 | 2 | 1  | yes |    |
| at_locus.06147 | 4 | 1,141,936 | 1,142,930 | 12 | 1 | 16 | yes | TE |
| at_locus.06148 | 4 | 1,198,715 | 1,198,914 | 11 | 0 | 0  | no  | TE |
| at_locus.06149 | 4 | 1,199,497 | 1,199,583 | 6  | 0 | 0  | yes | TE |
| at_locus.06150 | 4 | 1,224,067 | 1,224,096 | 5  | 0 | 0  | yes |    |
| at_locus.06151 | 4 | 1,230,493 | 1,231,013 | 17 | 1 | 4  | yes | TE |
| at_locus.06152 | 4 | 1,231,357 | 1,231,724 | 11 | 1 | 4  | yes | TE |
| at_locus.06153 | 4 | 1,234,511 | 1,234,797 | 4  | 0 | 1  | yes | TE |
| at_locus.06154 | 4 | 1,270,697 | 1,270,823 | 10 | 0 | 0  | yes | TE |
| at_locus.06155 | 4 | 1,279,126 | 1,279,451 | 0  | 5 | 0  | yes |    |
| at_locus.06156 | 4 | 1,280,720 | 1,280,794 | 25 | 0 | 2  | no  | TE |

|                |   |           |           |    |    |    |     |    |
|----------------|---|-----------|-----------|----|----|----|-----|----|
| at_locus.06157 | 4 | 1,281,061 | 1,281,213 | 7  | 0  | 1  | yes | TE |
| at_locus.06158 | 4 | 1,281,707 | 1,282,685 | 28 | 0  | 6  | yes | TE |
| at_locus.06159 | 4 | 1,288,505 | 1,288,635 | 5  | 0  | 3  | yes |    |
| at_locus.06160 | 4 | 1,289,766 | 1,290,006 | 6  | 0  | 4  | yes |    |
| at_locus.06161 | 4 | 1,302,810 | 1,302,890 | 7  | 0  | 0  | no  | TE |
| at_locus.06162 | 4 | 1,318,897 | 1,319,171 | 2  | 12 | 1  | yes |    |
| at_locus.06163 | 4 | 1,337,720 | 1,337,763 | 5  | 0  | 0  | yes |    |
| at_locus.06164 | 4 | 1,337,972 | 1,338,144 | 7  | 0  | 1  | yes |    |
| at_locus.06165 | 4 | 1,349,585 | 1,349,670 | 5  | 0  | 0  | no  | TE |
| at_locus.06166 | 4 | 1,350,278 | 1,350,590 | 11 | 2  | 0  | no  | TE |
| at_locus.06167 | 4 | 1,350,847 | 1,351,433 | 22 | 0  | 0  | yes | TE |
| at_locus.06168 | 4 | 1,366,018 | 1,366,165 | 12 | 0  | 0  | yes |    |
| at_locus.06169 | 4 | 1,373,200 | 1,373,280 | 5  | 0  | 0  | yes |    |
| at_locus.06170 | 4 | 1,416,675 | 1,416,695 | 0  | 17 | 0  | yes |    |
| at_locus.06171 | 4 | 1,438,692 | 1,438,965 | 12 | 1  | 0  | yes |    |
| at_locus.06173 | 4 | 1,449,217 | 1,449,523 | 5  | 0  | 0  | no  | TE |
| at_locus.06174 | 4 | 1,450,475 | 1,450,998 | 11 | 0  | 14 | no  | TE |
| at_locus.06175 | 4 | 1,451,046 | 1,451,727 | 9  | 0  | 5  | no  | TE |
| at_locus.06176 | 4 | 1,455,203 | 1,455,598 | 7  | 0  | 5  | no  | TE |
| at_locus.06177 | 4 | 1,455,987 | 1,456,390 | 3  | 0  | 9  | no  | TE |
| at_locus.06178 | 4 | 1,457,593 | 1,457,870 | 1  | 0  | 5  | yes | TE |
| at_locus.06179 | 4 | 1,458,178 | 1,458,394 | 4  | 0  | 1  | no  | TE |
| at_locus.06180 | 4 | 1,458,583 | 1,458,674 | 0  | 0  | 5  | no  | TE |
| at_locus.06181 | 4 | 1,462,510 | 1,462,821 | 2  | 0  | 7  | no  | TE |
| at_locus.06182 | 4 | 1,462,976 | 1,463,337 | 6  | 0  | 0  | no  | TE |
| at_locus.06183 | 4 | 1,472,830 | 1,473,012 | 4  | 11 | 2  | no  |    |
| at_locus.06184 | 4 | 1,476,469 | 1,476,573 | 1  | 13 | 3  | yes |    |
| at_locus.06185 | 4 | 1,480,147 | 1,480,687 | 22 | 0  | 15 | yes | TE |
| at_locus.06186 | 4 | 1,483,020 | 1,483,121 | 11 | 38 | 13 | no  |    |
| at_locus.06187 | 4 | 1,485,097 | 1,485,243 | 0  | 0  | 4  | yes |    |
| at_locus.06188 | 4 | 1,485,497 | 1,485,973 | 26 | 0  | 17 | yes |    |
| at_locus.06189 | 4 | 1,487,417 | 1,487,515 | 10 | 0  | 1  | yes | TE |
| at_locus.06190 | 4 | 1,488,415 | 1,488,577 | 8  | 0  | 0  | yes | TE |
| at_locus.06191 | 4 | 1,509,098 | 1,509,136 | 5  | 0  | 0  | yes |    |
| at_locus.06193 | 4 | 1,521,308 | 1,521,815 | 36 | 1  | 0  | no  | TE |
| at_locus.06194 | 4 | 1,528,145 | 1,528,352 | 52 | 42 | 17 | yes |    |
| at_locus.06195 | 4 | 1,535,437 | 1,535,643 | 52 | 41 | 17 | no  |    |

|                |   |           |           |     |   |     |     |    |
|----------------|---|-----------|-----------|-----|---|-----|-----|----|
| at_locus.06196 | 4 | 1,568,629 | 1,568,885 | 6   | 0 | 0   | yes |    |
| at_locus.06197 | 4 | 1,593,380 | 1,593,541 | 0   | 0 | 4   | yes |    |
| at_locus.06198 | 4 | 1,593,967 | 1,594,943 | 3   | 0 | 19  | yes | TE |
| at_locus.06199 | 4 | 1,595,447 | 1,595,812 | 11  | 1 | 8   | yes |    |
| at_locus.06200 | 4 | 1,596,067 | 1,599,099 | 101 | 3 | 85  | yes | TE |
| at_locus.06201 | 4 | 1,599,641 | 1,599,920 | 18  | 1 | 16  | yes |    |
| at_locus.06202 | 4 | 1,600,390 | 1,600,801 | 1   | 0 | 5   | yes |    |
| at_locus.06203 | 4 | 1,618,226 | 1,624,332 | 157 | 3 | 143 | yes | TE |
| at_locus.06204 | 4 | 1,626,712 | 1,626,849 | 0   | 0 | 4   | no  | TE |
| at_locus.06205 | 4 | 1,644,127 | 1,645,183 | 74  | 3 | 12  | yes | TE |
| at_locus.06206 | 4 | 1,656,921 | 1,657,548 | 11  | 0 | 1   | yes | TE |
| at_locus.06207 | 4 | 1,660,668 | 1,660,987 | 6   | 0 | 2   | yes | TE |
| at_locus.06208 | 4 | 1,668,077 | 1,668,966 | 25  | 2 | 18  | yes | TE |
| at_locus.06209 | 4 | 1,682,497 | 1,682,803 | 3   | 0 | 10  | yes | TE |
| at_locus.06210 | 4 | 1,685,025 | 1,686,428 | 20  | 0 | 30  | yes | TE |
| at_locus.06211 | 4 | 1,686,613 | 1,687,221 | 16  | 0 | 9   | no  | TE |
| at_locus.06212 | 4 | 1,687,626 | 1,690,303 | 58  | 3 | 52  | yes | TE |
| at_locus.06213 | 4 | 1,691,092 | 1,691,699 | 4   | 0 | 11  | no  | TE |
| at_locus.06214 | 4 | 1,692,033 | 1,692,344 | 8   | 0 | 10  | yes | TE |
| at_locus.06215 | 4 | 1,692,863 | 1,693,041 | 2   | 0 | 5   | no  | TE |
| at_locus.06216 | 4 | 1,693,341 | 1,695,425 | 25  | 3 | 35  | yes | TE |
| at_locus.06217 | 4 | 1,695,809 | 1,696,078 | 2   | 0 | 5   | no  | TE |
| at_locus.06218 | 4 | 1,697,612 | 1,698,057 | 6   | 0 | 2   | no  | TE |
| at_locus.06219 | 4 | 1,699,236 | 1,699,487 | 2   | 0 | 4   | no  | TE |
| at_locus.06220 | 4 | 1,700,166 | 1,700,824 | 13  | 0 | 8   | yes | TE |
| at_locus.06221 | 4 | 1,701,179 | 1,701,448 | 0   | 0 | 5   | no  | TE |
| at_locus.06222 | 4 | 1,702,125 | 1,702,864 | 15  | 0 | 9   | yes | TE |
| at_locus.06223 | 4 | 1,704,082 | 1,704,802 | 12  | 0 | 10  | no  | TE |
| at_locus.06224 | 4 | 1,705,046 | 1,705,315 | 2   | 0 | 5   | no  | TE |
| at_locus.06225 | 4 | 1,705,992 | 1,706,731 | 17  | 0 | 16  | no  | TE |
| at_locus.06226 | 4 | 1,707,938 | 1,708,687 | 17  | 0 | 16  | no  | TE |
| at_locus.06227 | 4 | 1,708,952 | 1,709,221 | 2   | 0 | 5   | no  | TE |
| at_locus.06228 | 4 | 1,709,444 | 1,709,666 | 2   | 0 | 4   | no  | TE |
| at_locus.06229 | 4 | 1,709,898 | 1,710,693 | 17  | 0 | 15  | yes | TE |
| at_locus.06230 | 4 | 1,711,404 | 1,711,626 | 3   | 0 | 4   | no  | TE |
| at_locus.06231 | 4 | 1,711,990 | 1,712,631 | 17  | 0 | 13  | yes | TE |
| at_locus.06232 | 4 | 1,712,849 | 1,713,118 | 3   | 0 | 6   | no  | TE |

|                |   |           |           |    |   |    |     |    |
|----------------|---|-----------|-----------|----|---|----|-----|----|
| at_locus.06233 | 4 | 1,713,315 | 1,713,563 | 4  | 0 | 4  | yes | TE |
| at_locus.06234 | 4 | 1,713,795 | 1,714,579 | 15 | 0 | 7  | yes | TE |
| at_locus.06235 | 4 | 1,714,798 | 1,715,067 | 3  | 0 | 6  | no  | TE |
| at_locus.06236 | 4 | 1,715,800 | 1,716,482 | 8  | 0 | 10 | no  | TE |
| at_locus.06237 | 4 | 1,716,746 | 1,717,015 | 2  | 0 | 6  | no  | TE |
| at_locus.06238 | 4 | 1,717,748 | 1,718,339 | 8  | 0 | 9  | no  | TE |
| at_locus.06239 | 4 | 1,718,694 | 1,718,963 | 2  | 0 | 5  | no  | TE |
| at_locus.06240 | 4 | 1,719,186 | 1,719,408 | 3  | 0 | 4  | no  | TE |
| at_locus.06241 | 4 | 1,719,696 | 1,720,379 | 17 | 0 | 16 | no  | TE |
| at_locus.06242 | 4 | 1,720,672 | 1,720,912 | 2  | 0 | 5  | no  | TE |
| at_locus.06243 | 4 | 1,721,589 | 1,722,236 | 10 | 0 | 10 | no  | TE |
| at_locus.06244 | 4 | 1,722,541 | 1,722,860 | 2  | 0 | 6  | no  | TE |
| at_locus.06245 | 4 | 1,723,537 | 1,724,275 | 11 | 0 | 16 | no  | TE |
| at_locus.06246 | 4 | 1,724,539 | 1,724,807 | 2  | 0 | 5  | no  | TE |
| at_locus.06247 | 4 | 1,725,030 | 1,725,252 | 3  | 0 | 4  | no  | TE |
| at_locus.06248 | 4 | 1,725,484 | 1,726,130 | 14 | 0 | 14 | no  | TE |
| at_locus.06249 | 4 | 1,726,435 | 1,726,754 | 2  | 0 | 4  | no  | TE |
| at_locus.06250 | 4 | 1,726,977 | 1,727,199 | 3  | 0 | 4  | no  | TE |
| at_locus.06251 | 4 | 1,727,431 | 1,728,407 | 14 | 0 | 13 | yes | TE |
| at_locus.06252 | 4 | 1,728,622 | 1,729,038 | 6  | 0 | 6  | no  | TE |
| at_locus.06253 | 4 | 1,729,380 | 1,730,119 | 11 | 0 | 9  | no  | TE |
| at_locus.06254 | 4 | 1,730,383 | 1,730,652 | 1  | 0 | 4  | no  | TE |
| at_locus.06255 | 4 | 1,731,327 | 1,732,063 | 13 | 0 | 15 | yes | TE |
| at_locus.06256 | 4 | 1,732,327 | 1,732,596 | 2  | 0 | 4  | no  | TE |
| at_locus.06257 | 4 | 1,733,273 | 1,734,141 | 14 | 0 | 15 | no  | TE |
| at_locus.06258 | 4 | 1,734,240 | 1,734,844 | 4  | 0 | 6  | no  | TE |
| at_locus.06259 | 4 | 1,735,187 | 1,736,055 | 13 | 0 | 7  | no  | TE |
| at_locus.06260 | 4 | 1,737,098 | 1,737,967 | 13 | 0 | 16 | no  | TE |
| at_locus.06261 | 4 | 1,738,066 | 1,738,335 | 2  | 0 | 5  | no  | TE |
| at_locus.06262 | 4 | 1,739,004 | 1,739,729 | 9  | 0 | 13 | no  | TE |
| at_locus.06263 | 4 | 1,739,957 | 1,740,226 | 3  | 0 | 5  | no  | TE |
| at_locus.06264 | 4 | 1,740,903 | 1,741,086 | 4  | 0 | 1  | no  | TE |
| at_locus.06265 | 4 | 1,741,327 | 1,741,514 | 5  | 0 | 1  | no  | TE |
| at_locus.06266 | 4 | 1,742,906 | 1,743,237 | 4  | 0 | 0  | no  | TE |
| at_locus.06267 | 4 | 1,757,141 | 1,757,338 | 5  | 0 | 0  | yes |    |
| at_locus.06268 | 4 | 1,763,915 | 1,764,432 | 4  | 0 | 6  | no  | TE |
| at_locus.06269 | 4 | 1,776,102 | 1,776,129 | 5  | 0 | 0  | yes |    |

|                |   |           |           |    |   |    |     |    |
|----------------|---|-----------|-----------|----|---|----|-----|----|
| at_locus.06270 | 4 | 1,777,284 | 1,777,364 | 8  | 0 | 1  | no  | TE |
| at_locus.06271 | 4 | 1,786,699 | 1,787,853 | 7  | 0 | 19 | no  | TE |
| at_locus.06272 | 4 | 1,788,515 | 1,788,843 | 1  | 0 | 4  | no  | TE |
| at_locus.06273 | 4 | 1,789,050 | 1,789,311 | 2  | 0 | 6  | no  | TE |
| at_locus.06274 | 4 | 1,795,095 | 1,795,179 | 5  | 0 | 1  | yes | TE |
| at_locus.06275 | 4 | 1,796,245 | 1,797,086 | 22 | 2 | 15 | yes | TE |
| at_locus.06276 | 4 | 1,797,376 | 1,797,585 | 1  | 0 | 4  | no  | TE |
| at_locus.06277 | 4 | 1,798,606 | 1,798,785 | 2  | 0 | 4  | yes | TE |
| at_locus.06278 | 4 | 1,801,606 | 1,803,071 | 27 | 1 | 25 | yes | TE |
| at_locus.06279 | 4 | 1,803,804 | 1,804,521 | 15 | 2 | 15 | no  | TE |
| at_locus.06280 | 4 | 1,806,023 | 1,806,427 | 2  | 0 | 4  | no  | TE |
| at_locus.06281 | 4 | 1,807,884 | 1,808,301 | 14 | 1 | 7  | yes | TE |
| at_locus.06282 | 4 | 1,808,523 | 1,809,112 | 14 | 1 | 23 | yes | TE |
| at_locus.06283 | 4 | 1,809,252 | 1,809,842 | 7  | 1 | 11 | no  | TE |
| at_locus.06284 | 4 | 1,810,207 | 1,810,404 | 5  | 0 | 8  | no  | TE |
| at_locus.06285 | 4 | 1,810,872 | 1,811,264 | 1  | 0 | 5  | yes | TE |
| at_locus.06286 | 4 | 1,811,775 | 1,812,954 | 12 | 0 | 17 | no  | TE |
| at_locus.06287 | 4 | 1,825,758 | 1,826,124 | 1  | 0 | 8  | no  | TE |
| at_locus.06288 | 4 | 1,839,937 | 1,840,205 | 6  | 0 | 0  | no  | TE |
| at_locus.06289 | 4 | 1,842,014 | 1,842,225 | 4  | 0 | 1  | no  | TE |
| at_locus.06290 | 4 | 1,843,423 | 1,844,133 | 6  | 0 | 5  | no  | TE |
| at_locus.06291 | 4 | 1,844,387 | 1,844,825 | 0  | 0 | 4  | no  | TE |
| at_locus.06292 | 4 | 1,845,060 | 1,845,461 | 4  | 0 | 6  | no  | TE |
| at_locus.06293 | 4 | 1,845,812 | 1,845,890 | 6  | 0 | 1  | no  | TE |
| at_locus.06294 | 4 | 1,856,848 | 1,856,921 | 0  | 0 | 5  | yes | TE |
| at_locus.06295 | 4 | 1,861,794 | 1,862,013 | 6  | 0 | 1  | yes | TE |
| at_locus.06296 | 4 | 1,866,876 | 1,867,878 | 7  | 0 | 6  | yes | TE |
| at_locus.06297 | 4 | 1,872,090 | 1,872,126 | 4  | 0 | 0  | yes |    |
| at_locus.06298 | 4 | 1,875,522 | 1,875,592 | 6  | 0 | 0  | no  | TE |
| at_locus.06299 | 4 | 1,881,621 | 1,882,076 | 5  | 0 | 4  | no  | TE |
| at_locus.06300 | 4 | 1,899,094 | 1,899,130 | 5  | 0 | 0  | no  | TE |
| at_locus.06301 | 4 | 1,909,850 | 1,910,090 | 23 | 0 | 18 | no  | TE |
| at_locus.06302 | 4 | 1,910,317 | 1,910,786 | 8  | 0 | 4  | no  | TE |
| at_locus.06303 | 4 | 1,912,394 | 1,912,655 | 4  | 0 | 2  | no  | TE |
| at_locus.06304 | 4 | 1,915,173 | 1,915,300 | 5  | 0 | 1  | no  | TE |
| at_locus.06305 | 4 | 1,915,424 | 1,916,465 | 9  | 0 | 13 | yes | TE |
| at_locus.06306 | 4 | 1,919,418 | 1,919,446 | 6  | 0 | 0  | no  | TE |



|                |   |           |           |    |   |    |     |    |
|----------------|---|-----------|-----------|----|---|----|-----|----|
| at_locus.06307 | 4 | 1,920,754 | 1,921,066 | 2  | 0 | 4  | yes | TE |
| at_locus.06308 | 4 | 1,925,670 | 1,925,885 | 6  | 0 | 1  | no  | TE |
| at_locus.06309 | 4 | 1,926,198 | 1,926,602 | 4  | 1 | 2  | no  | TE |
| at_locus.06310 | 4 | 1,927,891 | 1,928,255 | 1  | 0 | 4  | no  | TE |
| at_locus.06311 | 4 | 1,929,283 | 1,929,535 | 5  | 0 | 5  | no  | TE |
| at_locus.06312 | 4 | 1,930,119 | 1,931,091 | 16 | 1 | 24 | yes | TE |
| at_locus.06313 | 4 | 1,957,675 | 1,957,699 | 4  | 0 | 0  | no  | TE |
| at_locus.06314 | 4 | 1,958,786 | 1,959,456 | 10 | 0 | 1  | yes |    |
| at_locus.06315 | 4 | 1,994,520 | 1,994,678 | 4  | 0 | 0  | yes | TE |
| at_locus.06316 | 4 | 1,995,304 | 1,995,791 | 1  | 0 | 6  | yes |    |
| at_locus.06317 | 4 | 2,000,180 | 2,000,534 | 4  | 0 | 4  | no  | TE |
| at_locus.06318 | 4 | 2,020,272 | 2,020,299 | 4  | 0 | 0  | yes |    |
| at_locus.06319 | 4 | 2,038,743 | 2,039,248 | 3  | 0 | 4  | no  | TE |
| at_locus.06320 | 4 | 2,039,940 | 2,040,151 | 6  | 0 | 0  | yes | TE |
| at_locus.06321 | 4 | 2,042,361 | 2,042,494 | 4  | 0 | 0  | yes |    |
| at_locus.06322 | 4 | 2,047,028 | 2,047,523 | 11 | 0 | 3  | yes |    |
| at_locus.06323 | 4 | 2,047,728 | 2,048,133 | 8  | 0 | 0  | yes |    |
| at_locus.06324 | 4 | 2,051,038 | 2,051,373 | 11 | 0 | 0  | yes | TE |
| at_locus.06325 | 4 | 2,053,612 | 2,053,853 | 4  | 0 | 3  | yes | TE |
| at_locus.06326 | 4 | 2,062,325 | 2,062,604 | 2  | 0 | 4  | no  | TE |
| at_locus.06327 | 4 | 2,062,869 | 2,062,930 | 0  | 0 | 5  | no  | TE |
| at_locus.06328 | 4 | 2,071,766 | 2,071,928 | 12 | 0 | 2  | yes | TE |
| at_locus.06329 | 4 | 2,072,034 | 2,072,258 | 1  | 0 | 5  | yes | TE |
| at_locus.06330 | 4 | 2,072,821 | 2,072,870 | 5  | 0 | 0  | no  | TE |
| at_locus.06331 | 4 | 2,073,055 | 2,073,970 | 73 | 7 | 84 | yes | TE |
| at_locus.06332 | 4 | 2,074,621 | 2,075,352 | 8  | 0 | 6  | yes |    |
| at_locus.06333 | 4 | 2,075,588 | 2,076,457 | 9  | 0 | 38 | yes |    |
| at_locus.06334 | 4 | 2,076,838 | 2,077,563 | 16 | 0 | 21 | yes | TE |
| at_locus.06335 | 4 | 2,080,114 | 2,080,534 | 5  | 0 | 4  | yes |    |
| at_locus.06336 | 4 | 2,093,596 | 2,093,812 | 6  | 0 | 1  | no  | TE |
| at_locus.06337 | 4 | 2,095,090 | 2,095,305 | 4  | 0 | 3  | yes | TE |
| at_locus.06338 | 4 | 2,096,835 | 2,097,188 | 5  | 1 | 0  | yes | TE |
| at_locus.06339 | 4 | 2,104,663 | 2,104,928 | 0  | 0 | 4  | yes | TE |
| at_locus.06340 | 4 | 2,120,759 | 2,120,924 | 9  | 0 | 1  | yes | TE |
| at_locus.06341 | 4 | 2,161,816 | 2,161,856 | 1  | 1 | 4  | no  | TE |
| at_locus.06342 | 4 | 2,163,504 | 2,163,589 | 3  | 0 | 7  | no  | TE |
| at_locus.06343 | 4 | 2,169,121 | 2,169,225 | 12 | 0 | 2  | no  | TE |

|                |   |           |           |    |   |    |     |    |
|----------------|---|-----------|-----------|----|---|----|-----|----|
| at_locus.06344 | 4 | 2,169,521 | 2,169,653 | 14 | 0 | 0  | no  | TE |
| at_locus.06345 | 4 | 2,170,629 | 2,170,715 | 0  | 0 | 5  | yes |    |
| at_locus.06346 | 4 | 2,175,343 | 2,175,741 | 5  | 0 | 1  | yes | TE |
| at_locus.06347 | 4 | 2,186,141 | 2,186,618 | 4  | 0 | 5  | yes |    |
| at_locus.06348 | 4 | 2,198,490 | 2,199,163 | 5  | 0 | 8  | yes | TE |
| at_locus.06349 | 4 | 2,200,946 | 2,201,233 | 0  | 0 | 4  | no  | TE |
| at_locus.06350 | 4 | 2,203,769 | 2,203,973 | 3  | 0 | 4  | no  | TE |
| at_locus.06351 | 4 | 2,209,090 | 2,209,196 | 0  | 0 | 4  | no  | TE |
| at_locus.06352 | 4 | 2,236,215 | 2,237,032 | 10 | 0 | 13 | yes | TE |
| at_locus.06353 | 4 | 2,244,770 | 2,245,121 | 4  | 0 | 1  | yes | TE |
| at_locus.06354 | 4 | 2,251,322 | 2,251,348 | 0  | 0 | 4  | yes | TE |
| at_locus.06355 | 4 | 2,251,856 | 2,252,238 | 1  | 0 | 5  | yes | TE |
| at_locus.06356 | 4 | 2,258,318 | 2,258,485 | 11 | 0 | 0  | yes | TE |
| at_locus.06357 | 4 | 2,261,737 | 2,261,893 | 9  | 0 | 0  | no  | TE |
| at_locus.06358 | 4 | 2,288,670 | 2,288,851 | 8  | 0 | 0  | yes | TE |
| at_locus.06359 | 4 | 2,292,265 | 2,292,472 | 4  | 0 | 0  | no  | TE |
| at_locus.06360 | 4 | 2,298,392 | 2,298,746 | 4  | 0 | 0  | no  | TE |
| at_locus.06361 | 4 | 2,311,247 | 2,311,279 | 4  | 0 | 0  | yes |    |
| at_locus.06362 | 4 | 2,313,442 | 2,313,513 | 4  | 0 | 0  | no  |    |
| at_locus.06363 | 4 | 2,316,112 | 2,316,251 | 4  | 0 | 0  | no  | TE |
| at_locus.06364 | 4 | 2,317,853 | 2,318,159 | 4  | 0 | 2  | yes |    |
| at_locus.06365 | 4 | 2,323,379 | 2,323,790 | 9  | 0 | 0  | yes | TE |
| at_locus.06366 | 4 | 2,335,187 | 2,335,509 | 22 | 0 | 1  | no  |    |
| at_locus.06367 | 4 | 2,339,584 | 2,340,053 | 10 | 0 | 17 | yes |    |
| at_locus.06368 | 4 | 2,340,547 | 2,341,163 | 9  | 0 | 3  | yes | TE |
| at_locus.06369 | 4 | 2,342,177 | 2,342,201 | 4  | 0 | 1  | no  | TE |
| at_locus.06370 | 4 | 2,346,072 | 2,347,191 | 11 | 4 | 10 | yes | TE |
| at_locus.06371 | 4 | 2,355,764 | 2,356,034 | 5  | 0 | 4  | yes |    |
| at_locus.06372 | 4 | 2,359,289 | 2,359,366 | 0  | 0 | 4  | yes | TE |
| at_locus.06373 | 4 | 2,361,830 | 2,362,094 | 5  | 0 | 0  | yes | TE |
| at_locus.06374 | 4 | 2,362,114 | 2,363,316 | 25 | 1 | 19 | yes | TE |
| at_locus.06375 | 4 | 2,366,491 | 2,366,519 | 0  | 0 | 4  | yes |    |
| at_locus.06376 | 4 | 2,366,718 | 2,367,122 | 7  | 0 | 3  | yes |    |
| at_locus.06377 | 4 | 2,379,558 | 2,379,979 | 50 | 1 | 31 | yes |    |
| at_locus.06378 | 4 | 2,380,551 | 2,380,755 | 7  | 0 | 1  | yes |    |
| at_locus.06379 | 4 | 2,399,665 | 2,399,697 | 8  | 0 | 0  | yes |    |
| at_locus.06380 | 4 | 2,400,835 | 2,400,861 | 4  | 1 | 0  | yes |    |

|                |   |           |           |     |   |     |     |    |
|----------------|---|-----------|-----------|-----|---|-----|-----|----|
| at_locus.06381 | 4 | 2,401,598 | 2,401,799 | 7   | 0 | 10  | yes |    |
| at_locus.06382 | 4 | 2,409,406 | 2,410,053 | 57  | 2 | 19  | yes |    |
| at_locus.06383 | 4 | 2,430,734 | 2,431,465 | 23  | 0 | 3   | yes | TE |
| at_locus.06384 | 4 | 2,431,690 | 2,432,067 | 26  | 0 | 2   | yes | TE |
| at_locus.06385 | 4 | 2,450,365 | 2,450,396 | 4   | 0 | 0   | yes | TE |
| at_locus.06386 | 4 | 2,470,185 | 2,470,376 | 5   | 0 | 0   | no  | TE |
| at_locus.06387 | 4 | 2,496,606 | 2,496,818 | 9   | 0 | 0   | no  | TE |
| at_locus.06388 | 4 | 2,508,694 | 2,508,920 | 12  | 0 | 0   | yes | TE |
| at_locus.06389 | 4 | 2,520,882 | 2,521,672 | 38  | 0 | 38  | yes | TE |
| at_locus.06390 | 4 | 2,526,748 | 2,527,487 | 41  | 1 | 31  | yes |    |
| at_locus.06391 | 4 | 2,532,123 | 2,532,285 | 4   | 0 | 0   | yes |    |
| at_locus.06392 | 4 | 2,553,594 | 2,553,932 | 14  | 0 | 0   | no  | TE |
| at_locus.06393 | 4 | 2,554,526 | 2,554,633 | 7   | 0 | 1   | yes | TE |
| at_locus.06394 | 4 | 2,559,216 | 2,561,847 | 463 | 5 | 282 | yes | TE |
| at_locus.06395 | 4 | 2,562,073 | 2,562,109 | 5   | 1 | 1   | yes |    |
| at_locus.06396 | 4 | 2,592,445 | 2,592,749 | 12  | 0 | 0   | no  |    |
| at_locus.06397 | 4 | 2,594,973 | 2,595,273 | 17  | 0 | 0   | yes | TE |
| at_locus.06398 | 4 | 2,602,432 | 2,602,628 | 0   | 0 | 4   | yes |    |
| at_locus.06399 | 4 | 2,604,716 | 2,605,013 | 7   | 0 | 4   | yes | TE |
| at_locus.06400 | 4 | 2,605,427 | 2,606,121 | 17  | 3 | 1   | yes | TE |
| at_locus.06401 | 4 | 2,606,650 | 2,606,862 | 4   | 0 | 0   | no  |    |
| at_locus.06402 | 4 | 2,636,328 | 2,636,410 | 6   | 0 | 0   | yes |    |
| at_locus.06403 | 4 | 2,639,703 | 2,640,376 | 22  | 0 | 9   | yes | TE |
| at_locus.06404 | 4 | 2,645,661 | 2,646,227 | 0   | 0 | 7   | yes | TE |
| at_locus.06405 | 4 | 2,648,290 | 2,648,315 | 4   | 0 | 3   | no  | TE |
| at_locus.06406 | 4 | 2,650,669 | 2,650,832 | 6   | 0 | 1   | yes | TE |
| at_locus.06407 | 4 | 2,663,925 | 2,664,187 | 60  | 1 | 2   | yes | TE |
| at_locus.06408 | 4 | 2,670,138 | 2,670,241 | 4   | 0 | 0   | yes | TE |
| at_locus.06409 | 4 | 2,674,069 | 2,674,467 | 6   | 0 | 1   | no  | TE |
| at_locus.06410 | 4 | 2,692,696 | 2,692,747 | 4   | 0 | 0   | yes |    |
| at_locus.06411 | 4 | 2,697,375 | 2,697,850 | 15  | 0 | 11  | no  | TE |
| at_locus.06412 | 4 | 2,698,079 | 2,698,120 | 0   | 0 | 12  | no  | TE |
| at_locus.06413 | 4 | 2,698,447 | 2,698,849 | 5   | 0 | 5   | no  | TE |
| at_locus.06414 | 4 | 2,699,189 | 2,699,315 | 1   | 0 | 4   | yes | TE |
| at_locus.06415 | 4 | 2,700,813 | 2,701,281 | 1   | 0 | 9   | yes | TE |
| at_locus.06416 | 4 | 2,701,518 | 2,701,645 | 5   | 0 | 1   | no  | TE |
| at_locus.06417 | 4 | 2,702,034 | 2,702,437 | 2   | 0 | 9   | no  | TE |

|                |   |           |           |    |   |    |     |    |
|----------------|---|-----------|-----------|----|---|----|-----|----|
| at_locus.06418 | 4 | 2,703,565 | 2,704,036 | 0  | 1 | 7  | no  | TE |
| at_locus.06419 | 4 | 2,704,242 | 2,704,952 | 2  | 0 | 9  | no  | TE |
| at_locus.06420 | 4 | 2,706,382 | 2,708,393 | 28 | 2 | 24 | yes | TE |
| at_locus.06421 | 4 | 2,708,810 | 2,709,158 | 5  | 1 | 4  | yes | TE |
| at_locus.06422 | 4 | 2,709,304 | 2,709,626 | 4  | 0 | 5  | no  | TE |
| at_locus.06423 | 4 | 2,709,799 | 2,710,067 | 4  | 0 | 1  | no  | TE |
| at_locus.06424 | 4 | 2,711,020 | 2,712,267 | 8  | 0 | 19 | yes | TE |
| at_locus.06425 | 4 | 2,712,717 | 2,712,998 | 8  | 0 | 5  | no  | TE |
| at_locus.06426 | 4 | 2,713,187 | 2,713,480 | 4  | 0 | 13 | no  | TE |
| at_locus.06427 | 4 | 2,713,914 | 2,714,156 | 19 | 0 | 0  | yes | TE |
| at_locus.06428 | 4 | 2,718,694 | 2,719,017 | 0  | 5 | 0  | yes |    |
| at_locus.06429 | 4 | 2,725,421 | 2,725,691 | 6  | 0 | 1  | yes |    |
| at_locus.06430 | 4 | 2,730,684 | 2,730,910 | 5  | 0 | 0  | no  |    |
| at_locus.06431 | 4 | 2,732,916 | 2,733,095 | 4  | 0 | 2  | yes |    |
| at_locus.06432 | 4 | 2,735,169 | 2,735,757 | 10 | 1 | 0  | yes | TE |
| at_locus.06433 | 4 | 2,756,074 | 2,756,456 | 11 | 0 | 2  | yes |    |
| at_locus.06434 | 4 | 2,763,146 | 2,763,494 | 1  | 1 | 8  | yes |    |
| at_locus.06435 | 4 | 2,773,519 | 2,773,985 | 10 | 0 | 1  | yes |    |
| at_locus.06436 | 4 | 2,774,797 | 2,774,900 | 4  | 0 | 2  | yes |    |
| at_locus.06437 | 4 | 2,775,652 | 2,775,749 | 2  | 0 | 6  | yes |    |
| at_locus.06438 | 4 | 2,789,599 | 2,789,755 | 15 | 0 | 0  | no  | TE |
| at_locus.06439 | 4 | 2,793,484 | 2,793,629 | 11 | 2 | 3  | no  | TE |
| at_locus.06440 | 4 | 2,797,326 | 2,797,476 | 4  | 0 | 6  | yes | TE |
| at_locus.06441 | 4 | 2,798,399 | 2,799,176 | 19 | 0 | 4  | yes | TE |
| at_locus.06442 | 4 | 2,800,219 | 2,800,694 | 4  | 0 | 4  | yes | TE |
| at_locus.06443 | 4 | 2,803,079 | 2,803,166 | 0  | 0 | 4  | yes | TE |
| at_locus.06444 | 4 | 2,809,182 | 2,809,846 | 45 | 0 | 3  | yes | TE |
| at_locus.06445 | 4 | 2,810,327 | 2,810,685 | 4  | 0 | 9  | yes |    |
| at_locus.06446 | 4 | 2,813,405 | 2,813,567 | 7  | 0 | 1  | yes |    |
| at_locus.06447 | 4 | 2,814,121 | 2,814,487 | 0  | 0 | 7  | yes |    |
| at_locus.06448 | 4 | 2,814,715 | 2,815,799 | 62 | 7 | 29 | yes |    |
| at_locus.06449 | 4 | 2,829,434 | 2,830,011 | 8  | 0 | 13 | no  | TE |
| at_locus.06450 | 4 | 2,831,198 | 2,831,748 | 15 | 3 | 19 | no  | TE |
| at_locus.06451 | 4 | 2,832,332 | 2,832,741 | 7  | 1 | 8  | no  | TE |
| at_locus.06452 | 4 | 2,833,182 | 2,834,149 | 12 | 0 | 8  | no  | TE |
| at_locus.06453 | 4 | 2,834,374 | 2,834,617 | 2  | 0 | 8  | yes | TE |
| at_locus.06454 | 4 | 2,834,767 | 2,836,334 | 15 | 0 | 25 | yes | TE |

|                |   |           |           |    |   |    |     |    |
|----------------|---|-----------|-----------|----|---|----|-----|----|
| at_locus.06455 | 4 | 2,836,681 | 2,836,894 | 7  | 0 | 11 | no  | TE |
| at_locus.06456 | 4 | 2,837,344 | 2,839,528 | 24 | 2 | 37 | no  | TE |
| at_locus.06457 | 4 | 2,856,547 | 2,856,817 | 1  | 0 | 5  | yes | TE |
| at_locus.06458 | 4 | 2,860,522 | 2,861,801 | 28 | 0 | 25 | yes | TE |
| at_locus.06459 | 4 | 2,862,518 | 2,862,763 | 0  | 0 | 4  | yes | TE |
| at_locus.06460 | 4 | 2,865,229 | 2,866,404 | 54 | 0 | 42 | yes | TE |
| at_locus.06461 | 4 | 2,867,214 | 2,868,332 | 48 | 2 | 15 | yes | TE |
| at_locus.06462 | 4 | 2,868,553 | 2,868,927 | 6  | 0 | 1  | no  | TE |
| at_locus.06463 | 4 | 2,869,728 | 2,870,894 | 16 | 0 | 32 | no  | TE |
| at_locus.06464 | 4 | 2,871,128 | 2,871,892 | 3  | 0 | 12 | yes | TE |
| at_locus.06465 | 4 | 2,872,130 | 2,873,973 | 23 | 0 | 47 | yes | TE |
| at_locus.06466 | 4 | 2,874,255 | 2,874,592 | 4  | 0 | 13 | no  | TE |
| at_locus.06467 | 4 | 2,874,894 | 2,875,325 | 43 | 2 | 5  | no  | TE |
| at_locus.06468 | 4 | 2,887,204 | 2,887,401 | 4  | 0 | 0  | yes | TE |
| at_locus.06469 | 4 | 2,890,685 | 2,891,767 | 9  | 0 | 14 | yes | TE |
| at_locus.06470 | 4 | 2,891,918 | 2,892,001 | 8  | 3 | 4  | no  | TE |
| at_locus.06471 | 4 | 2,892,256 | 2,893,197 | 7  | 0 | 14 | yes | TE |
| at_locus.06472 | 4 | 2,893,514 | 2,893,704 | 0  | 0 | 5  | yes | TE |
| at_locus.06473 | 4 | 2,894,646 | 2,894,724 | 1  | 0 | 4  | yes | TE |
| at_locus.06474 | 4 | 2,896,605 | 2,897,333 | 7  | 1 | 8  | yes | TE |
| at_locus.06475 | 4 | 2,897,579 | 2,898,054 | 2  | 0 | 5  | yes | TE |
| at_locus.06476 | 4 | 2,898,330 | 2,898,660 | 4  | 0 | 4  | no  | TE |
| at_locus.06477 | 4 | 2,899,058 | 2,899,488 | 8  | 0 | 5  | no  | TE |
| at_locus.06478 | 4 | 2,912,914 | 2,914,036 | 7  | 1 | 8  | no  | TE |
| at_locus.06479 | 4 | 2,916,668 | 2,916,839 | 1  | 0 | 4  | yes | TE |
| at_locus.06480 | 4 | 2,918,195 | 2,918,307 | 4  | 0 | 1  | no  | TE |
| at_locus.06481 | 4 | 2,919,333 | 2,919,389 | 3  | 1 | 5  | no  | TE |
| at_locus.06482 | 4 | 2,919,719 | 2,919,920 | 3  | 1 | 4  | no  | TE |
| at_locus.06483 | 4 | 2,920,579 | 2,920,635 | 2  | 1 | 5  | no  | TE |
| at_locus.06484 | 4 | 2,921,149 | 2,921,171 | 3  | 1 | 4  | no  | TE |
| at_locus.06485 | 4 | 2,921,532 | 2,921,884 | 3  | 1 | 7  | no  | TE |
| at_locus.06486 | 4 | 2,922,212 | 2,922,418 | 5  | 2 | 7  | no  | TE |
| at_locus.06487 | 4 | 2,922,719 | 2,922,775 | 3  | 1 | 5  | no  | TE |
| at_locus.06488 | 4 | 2,923,638 | 2,923,843 | 3  | 1 | 4  | no  | TE |
| at_locus.06489 | 4 | 2,924,142 | 2,924,198 | 3  | 1 | 5  | no  | TE |
| at_locus.06490 | 4 | 2,925,060 | 2,925,266 | 3  | 1 | 4  | no  | TE |
| at_locus.06491 | 4 | 2,925,565 | 2,925,621 | 3  | 1 | 5  | no  | TE |

|                |   |           |           |   |   |   |    |    |
|----------------|---|-----------|-----------|---|---|---|----|----|
| at_locus.06492 | 4 | 2,926,099 | 2,926,155 | 3 | 1 | 5 | no | TE |
| at_locus.06493 | 4 | 2,926,484 | 2,926,689 | 3 | 1 | 4 | no | TE |
| at_locus.06494 | 4 | 2,927,166 | 2,927,222 | 3 | 1 | 5 | no | TE |
| at_locus.06495 | 4 | 2,927,550 | 2,927,933 | 3 | 1 | 5 | no | TE |
| at_locus.06496 | 4 | 2,928,360 | 2,928,465 | 3 | 1 | 6 | no | TE |
| at_locus.06497 | 4 | 2,928,794 | 2,928,998 | 3 | 2 | 4 | no | TE |
| at_locus.06498 | 4 | 2,929,477 | 2,929,533 | 3 | 1 | 5 | no | TE |
| at_locus.06499 | 4 | 2,929,894 | 2,930,067 | 3 | 1 | 7 | no | TE |
| at_locus.06500 | 4 | 2,930,396 | 2,930,600 | 3 | 2 | 4 | no | TE |
| at_locus.06501 | 4 | 2,931,079 | 2,931,135 | 3 | 1 | 5 | no | TE |
| at_locus.06502 | 4 | 2,931,496 | 2,931,669 | 3 | 1 | 7 | no | TE |
| at_locus.06503 | 4 | 2,931,998 | 2,932,202 | 3 | 2 | 4 | no | TE |
| at_locus.06504 | 4 | 2,932,681 | 2,932,737 | 3 | 1 | 5 | no | TE |
| at_locus.06505 | 4 | 2,933,098 | 2,933,271 | 3 | 1 | 7 | no | TE |
| at_locus.06506 | 4 | 2,933,600 | 2,933,804 | 3 | 2 | 4 | no | TE |
| at_locus.06507 | 4 | 2,934,283 | 2,934,339 | 3 | 1 | 5 | no | TE |
| at_locus.06508 | 4 | 2,934,700 | 2,934,873 | 3 | 1 | 7 | no | TE |
| at_locus.06509 | 4 | 2,935,202 | 2,935,406 | 3 | 2 | 4 | no | TE |
| at_locus.06510 | 4 | 2,935,885 | 2,935,941 | 3 | 1 | 5 | no | TE |
| at_locus.06511 | 4 | 2,936,302 | 2,936,653 | 3 | 2 | 7 | no | TE |
| at_locus.06512 | 4 | 2,936,950 | 2,937,006 | 3 | 1 | 5 | no | TE |
| at_locus.06513 | 4 | 2,937,435 | 2,937,540 | 3 | 1 | 6 | no | TE |
| at_locus.06514 | 4 | 2,937,869 | 2,938,075 | 3 | 1 | 4 | no | TE |
| at_locus.06515 | 4 | 2,938,408 | 2,938,430 | 3 | 1 | 4 | no | TE |
| at_locus.06516 | 4 | 2,938,859 | 2,938,964 | 3 | 1 | 6 | no | TE |
| at_locus.06517 | 4 | 2,939,293 | 2,939,501 | 4 | 1 | 6 | no | TE |
| at_locus.06518 | 4 | 2,939,881 | 2,940,165 | 3 | 1 | 6 | no | TE |
| at_locus.06519 | 4 | 2,941,031 | 2,941,053 | 3 | 1 | 4 | no | TE |
| at_locus.06520 | 4 | 2,941,531 | 2,941,587 | 3 | 1 | 5 | no | TE |
| at_locus.06521 | 4 | 2,942,016 | 2,942,121 | 3 | 1 | 6 | no | TE |
| at_locus.06522 | 4 | 2,942,449 | 2,942,654 | 3 | 1 | 4 | no | TE |
| at_locus.06523 | 4 | 2,942,953 | 2,943,009 | 3 | 1 | 5 | no | TE |
| at_locus.06524 | 4 | 2,943,438 | 2,943,543 | 3 | 1 | 6 | no | TE |
| at_locus.06525 | 4 | 2,943,872 | 2,944,080 | 4 | 1 | 6 | no | TE |
| at_locus.06526 | 4 | 2,944,505 | 2,944,610 | 3 | 1 | 6 | no | TE |
| at_locus.06527 | 4 | 2,944,938 | 2,945,236 | 4 | 1 | 4 | no | TE |
| at_locus.06528 | 4 | 2,945,442 | 2,945,498 | 3 | 1 | 5 | no | TE |

|                |   |           |           |    |   |   |     |    |
|----------------|---|-----------|-----------|----|---|---|-----|----|
| at_locus.06529 | 4 | 2,945,927 | 2,946,032 | 3  | 1 | 6 | no  | TE |
| at_locus.06530 | 4 | 2,946,895 | 2,947,101 | 3  | 1 | 4 | no  | TE |
| at_locus.06531 | 4 | 2,947,400 | 2,947,456 | 3  | 1 | 5 | no  | TE |
| at_locus.06532 | 4 | 2,947,885 | 2,947,990 | 3  | 1 | 6 | no  | TE |
| at_locus.06533 | 4 | 2,948,319 | 2,948,524 | 3  | 1 | 4 | no  | TE |
| at_locus.06534 | 4 | 2,949,001 | 2,949,057 | 3  | 1 | 5 | no  | TE |
| at_locus.06535 | 4 | 2,949,385 | 2,949,590 | 3  | 1 | 4 | no  | TE |
| at_locus.06536 | 4 | 2,950,374 | 2,950,479 | 3  | 1 | 6 | no  | TE |
| at_locus.06537 | 4 | 2,950,807 | 2,951,012 | 3  | 1 | 4 | no  | TE |
| at_locus.06538 | 4 | 2,951,311 | 2,951,367 | 3  | 1 | 5 | no  | TE |
| at_locus.06539 | 4 | 2,951,796 | 2,951,901 | 3  | 1 | 6 | no  | TE |
| at_locus.06540 | 4 | 2,952,229 | 2,952,434 | 3  | 1 | 4 | no  | TE |
| at_locus.06541 | 4 | 2,952,733 | 2,952,789 | 3  | 1 | 5 | no  | TE |
| at_locus.06542 | 4 | 2,953,445 | 2,953,501 | 3  | 1 | 5 | no  | TE |
| at_locus.06543 | 4 | 2,954,542 | 2,954,747 | 3  | 1 | 5 | no  | TE |
| at_locus.06544 | 4 | 2,955,175 | 2,955,636 | 3  | 1 | 6 | no  | TE |
| at_locus.06545 | 4 | 2,956,064 | 2,956,169 | 3  | 1 | 6 | no  | TE |
| at_locus.06546 | 4 | 2,956,498 | 2,956,703 | 3  | 1 | 4 | no  | TE |
| at_locus.06547 | 4 | 2,957,359 | 2,957,415 | 3  | 1 | 5 | no  | TE |
| at_locus.06548 | 4 | 2,958,460 | 2,958,482 | 3  | 1 | 4 | no  | TE |
| at_locus.06549 | 4 | 2,958,731 | 2,959,017 | 4  | 1 | 4 | no  | TE |
| at_locus.06550 | 4 | 2,959,615 | 2,959,720 | 3  | 1 | 5 | no  | TE |
| at_locus.06551 | 4 | 2,960,232 | 2,960,254 | 3  | 1 | 4 | no  | TE |
| at_locus.06552 | 4 | 2,960,838 | 2,960,966 | 3  | 1 | 6 | yes | TE |
| at_locus.06553 | 4 | 2,961,300 | 2,961,322 | 3  | 1 | 4 | no  | TE |
| at_locus.06554 | 4 | 2,962,007 | 2,962,212 | 3  | 1 | 4 | no  | TE |
| at_locus.06555 | 4 | 2,962,640 | 2,962,924 | 3  | 1 | 6 | no  | TE |
| at_locus.06556 | 4 | 2,963,786 | 2,963,992 | 3  | 1 | 4 | no  | TE |
| at_locus.06557 | 4 | 2,964,243 | 2,964,525 | 3  | 1 | 8 | no  | TE |
| at_locus.06558 | 4 | 2,964,854 | 2,965,353 | 3  | 1 | 5 | no  | TE |
| at_locus.06559 | 4 | 2,965,599 | 2,965,673 | 10 | 0 | 0 | no  |    |
| at_locus.06560 | 4 | 2,965,977 | 2,966,357 | 3  | 1 | 4 | no  | TE |
| at_locus.06561 | 4 | 2,967,035 | 2,967,513 | 6  | 1 | 7 | no  | TE |
| at_locus.06562 | 4 | 2,967,763 | 2,968,319 | 2  | 1 | 7 | no  | TE |
| at_locus.06563 | 4 | 2,968,628 | 2,969,065 | 13 | 0 | 3 | no  | TE |
| at_locus.06564 | 4 | 2,972,131 | 2,972,555 | 4  | 0 | 5 | no  | TE |
| at_locus.06565 | 4 | 2,975,509 | 2,976,047 | 17 | 0 | 4 | no  | TE |

|                |   |           |           |    |   |    |     |    |
|----------------|---|-----------|-----------|----|---|----|-----|----|
| at_locus.06566 | 4 | 2,977,244 | 2,977,445 | 2  | 1 | 4  | no  | TE |
| at_locus.06567 | 4 | 2,977,712 | 2,977,768 | 3  | 1 | 5  | no  | TE |
| at_locus.06568 | 4 | 2,978,458 | 2,978,480 | 3  | 1 | 4  | no  | TE |
| at_locus.06569 | 4 | 2,981,493 | 2,981,698 | 3  | 1 | 5  | no  | TE |
| at_locus.06570 | 4 | 2,987,151 | 2,987,216 | 12 | 0 | 0  | no  | TE |
| at_locus.06571 | 4 | 3,004,735 | 3,004,942 | 1  | 0 | 4  | no  | TE |
| at_locus.06572 | 4 | 3,009,742 | 3,009,887 | 4  | 0 | 8  | no  | TE |
| at_locus.06573 | 4 | 3,010,634 | 3,010,958 | 0  | 0 | 5  | no  | TE |
| at_locus.06574 | 4 | 3,012,129 | 3,013,756 | 24 | 2 | 21 | no  | TE |
| at_locus.06575 | 4 | 3,014,029 | 3,015,846 | 56 | 0 | 51 | yes | TE |
| at_locus.06576 | 4 | 3,017,014 | 3,017,313 | 1  | 0 | 12 | no  | TE |
| at_locus.06577 | 4 | 3,017,503 | 3,017,723 | 4  | 0 | 2  | no  | TE |
| at_locus.06578 | 4 | 3,021,127 | 3,022,289 | 22 | 0 | 27 | yes | TE |
| at_locus.06579 | 4 | 3,022,553 | 3,023,622 | 22 | 0 | 14 | no  | TE |
| at_locus.06580 | 4 | 3,023,916 | 3,024,882 | 32 | 0 | 30 | no  | TE |
| at_locus.06581 | 4 | 3,025,927 | 3,026,359 | 5  | 2 | 8  | no  | TE |
| at_locus.06582 | 4 | 3,026,823 | 3,026,962 | 2  | 1 | 6  | no  | TE |
| at_locus.06583 | 4 | 3,027,356 | 3,027,495 | 2  | 1 | 5  | no  | TE |
| at_locus.06584 | 4 | 3,028,624 | 3,029,306 | 3  | 1 | 5  | no  | TE |
| at_locus.06585 | 4 | 3,029,514 | 3,029,545 | 3  | 2 | 5  | no  | TE |
| at_locus.06586 | 4 | 3,029,768 | 3,030,089 | 5  | 1 | 4  | no  | TE |
| at_locus.06587 | 4 | 3,033,933 | 3,034,059 | 8  | 1 | 7  | no  | TE |
| at_locus.06588 | 4 | 3,034,700 | 3,034,722 | 3  | 1 | 4  | no  | TE |
| at_locus.06589 | 4 | 3,035,565 | 3,035,587 | 2  | 1 | 4  | no  | TE |
| at_locus.06590 | 4 | 3,035,921 | 3,036,060 | 2  | 0 | 5  | no  | TE |
| at_locus.06591 | 4 | 3,038,970 | 3,039,171 | 3  | 1 | 4  | no  | TE |
| at_locus.06592 | 4 | 3,040,248 | 3,040,270 | 3  | 1 | 4  | no  | TE |
| at_locus.06593 | 4 | 3,040,780 | 3,040,802 | 2  | 1 | 4  | no  | TE |
| at_locus.06594 | 4 | 3,042,370 | 3,042,392 | 3  | 1 | 4  | no  | TE |
| at_locus.06595 | 4 | 3,043,260 | 3,043,630 | 1  | 1 | 5  | no  | TE |
| at_locus.06596 | 4 | 3,044,149 | 3,044,519 | 2  | 1 | 5  | no  | TE |
| at_locus.06597 | 4 | 3,045,392 | 3,045,514 | 4  | 1 | 5  | no  | TE |
| at_locus.06598 | 4 | 3,045,927 | 3,046,123 | 2  | 1 | 4  | no  | TE |
| at_locus.06599 | 4 | 3,046,461 | 3,046,658 | 2  | 1 | 4  | no  | TE |
| at_locus.06600 | 4 | 3,047,173 | 3,047,195 | 3  | 1 | 4  | no  | TE |
| at_locus.06601 | 4 | 3,047,707 | 3,047,900 | 3  | 1 | 5  | no  | TE |
| at_locus.06602 | 4 | 3,048,507 | 3,048,944 | 1  | 0 | 8  | no  | TE |



|                |   |           |           |     |     |     |     |    |
|----------------|---|-----------|-----------|-----|-----|-----|-----|----|
| at_locus.06603 | 4 | 3,054,303 | 3,061,548 | 272 | 280 | 263 | no  |    |
| at_locus.06604 | 4 | 3,073,796 | 3,074,165 | 9   | 0   | 8   | no  | TE |
| at_locus.06605 | 4 | 3,077,065 | 3,077,436 | 4   | 0   | 0   | no  | TE |
| at_locus.06606 | 4 | 3,077,696 | 3,078,001 | 4   | 0   | 0   | no  | TE |
| at_locus.06607 | 4 | 3,079,466 | 3,079,646 | 0   | 0   | 4   | no  | TE |
| at_locus.06608 | 4 | 3,083,387 | 3,083,460 | 7   | 0   | 6   | no  | TE |
| at_locus.06609 | 4 | 3,085,898 | 3,086,269 | 0   | 0   | 5   | yes | TE |
| at_locus.06610 | 4 | 3,087,171 | 3,088,294 | 13  | 1   | 20  | no  | TE |
| at_locus.06611 | 4 | 3,088,555 | 3,089,275 | 15  | 1   | 10  | no  | TE |
| at_locus.06612 | 4 | 3,089,705 | 3,089,979 | 4   | 0   | 5   | no  | TE |
| at_locus.06613 | 4 | 3,090,268 | 3,090,970 | 10  | 0   | 18  | yes | TE |
| at_locus.06614 | 4 | 3,091,028 | 3,092,298 | 42  | 4   | 28  | yes | TE |
| at_locus.06615 | 4 | 3,094,238 | 3,094,594 | 5   | 0   | 0   | no  | TE |
| at_locus.06616 | 4 | 3,094,813 | 3,095,253 | 5   | 1   | 11  | yes | TE |
| at_locus.06617 | 4 | 3,095,669 | 3,095,928 | 1   | 0   | 4   | no  | TE |
| at_locus.06618 | 4 | 3,096,153 | 3,097,304 | 16  | 1   | 18  | no  | TE |
| at_locus.06619 | 4 | 3,098,074 | 3,098,099 | 1   | 0   | 5   | no  | TE |
| at_locus.06620 | 4 | 3,098,379 | 3,099,251 | 14  | 1   | 22  | no  | TE |
| at_locus.06621 | 4 | 3,108,718 | 3,109,198 | 0   | 0   | 4   | no  | TE |
| at_locus.06622 | 4 | 3,112,743 | 3,112,913 | 4   | 0   | 2   | no  | TE |
| at_locus.06623 | 4 | 3,125,609 | 3,126,306 | 7   | 3   | 9   | no  | TE |
| at_locus.06624 | 4 | 3,126,712 | 3,127,400 | 14  | 0   | 10  | no  | TE |
| at_locus.06625 | 4 | 3,128,249 | 3,128,982 | 3   | 4   | 12  | no  | TE |
| at_locus.06626 | 4 | 3,132,993 | 3,133,070 | 7   | 0   | 1   | no  | TE |
| at_locus.06627 | 4 | 3,133,896 | 3,134,830 | 13  | 1   | 9   | no  | TE |
| at_locus.06628 | 4 | 3,137,595 | 3,137,762 | 1   | 0   | 4   | no  | TE |
| at_locus.06629 | 4 | 3,148,375 | 3,148,513 | 5   | 0   | 5   | no  | TE |
| at_locus.06630 | 4 | 3,148,874 | 3,149,161 | 4   | 0   | 7   | no  | TE |
| at_locus.06631 | 4 | 3,152,377 | 3,152,438 | 0   | 0   | 5   | no  | TE |
| at_locus.06632 | 4 | 3,156,679 | 3,156,873 | 0   | 0   | 4   | no  | TE |
| at_locus.06633 | 4 | 3,162,648 | 3,162,864 | 3   | 0   | 1   | no  | TE |
| at_locus.06634 | 4 | 3,173,398 | 3,174,254 | 8   | 0   | 17  | no  | TE |
| at_locus.06635 | 4 | 3,174,469 | 3,175,460 | 16  | 1   | 19  | no  | TE |
| at_locus.06636 | 4 | 3,175,868 | 3,176,079 | 4   | 0   | 7   | no  | TE |
| at_locus.06637 | 4 | 3,176,457 | 3,177,213 | 4   | 1   | 17  | no  | TE |
| at_locus.06638 | 4 | 3,177,271 | 3,178,532 | 39  | 3   | 37  | yes | TE |
| at_locus.06639 | 4 | 3,179,737 | 3,179,916 | 7   | 0   | 5   | no  | TE |

|                |   |           |           |    |   |    |     |    |
|----------------|---|-----------|-----------|----|---|----|-----|----|
| at_locus.06640 | 4 | 3,180,556 | 3,180,888 | 10 | 0 | 6  | no  | TE |
| at_locus.06641 | 4 | 3,181,054 | 3,182,811 | 17 | 1 | 36 | yes | TE |
| at_locus.06642 | 4 | 3,183,052 | 3,183,522 | 6  | 0 | 12 | no  | TE |
| at_locus.06643 | 4 | 3,183,725 | 3,183,787 | 5  | 0 | 5  | no  | TE |
| at_locus.06644 | 4 | 3,184,015 | 3,184,588 | 3  | 0 | 6  | yes | TE |
| at_locus.06645 | 4 | 3,194,449 | 3,194,471 | 3  | 1 | 4  | no  | TE |
| at_locus.06646 | 4 | 3,197,028 | 3,197,050 | 3  | 1 | 4  | no  | TE |
| at_locus.06647 | 4 | 3,199,276 | 3,199,584 | 4  | 1 | 4  | no  | TE |
| at_locus.06648 | 4 | 3,217,394 | 3,217,416 | 3  | 1 | 4  | no  | TE |
| at_locus.06649 | 4 | 3,219,630 | 3,219,784 | 4  | 1 | 4  | no  | TE |
| at_locus.06650 | 4 | 3,222,041 | 3,222,140 | 3  | 0 | 0  | no  |    |
| at_locus.06651 | 4 | 3,223,378 | 3,223,400 | 3  | 1 | 4  | no  | TE |
| at_locus.06652 | 4 | 3,228,273 | 3,228,295 | 3  | 1 | 4  | no  | TE |
| at_locus.06653 | 4 | 3,230,275 | 3,230,500 | 3  | 0 | 0  | no  |    |
| at_locus.06654 | 4 | 3,233,114 | 3,233,136 | 3  | 1 | 4  | no  | TE |
| at_locus.06655 | 4 | 3,235,672 | 3,235,694 | 3  | 1 | 4  | no  | TE |
| at_locus.06656 | 4 | 3,239,846 | 3,239,868 | 3  | 1 | 4  | no  | TE |
| at_locus.06657 | 4 | 3,241,876 | 3,242,101 | 3  | 0 | 0  | no  |    |
| at_locus.06658 | 4 | 3,244,743 | 3,244,765 | 3  | 1 | 4  | no  | TE |
| at_locus.06659 | 4 | 3,246,773 | 3,246,998 | 3  | 0 | 0  | no  |    |
| at_locus.06660 | 4 | 3,249,612 | 3,249,634 | 3  | 1 | 4  | no  | TE |
| at_locus.06661 | 4 | 3,254,480 | 3,254,502 | 3  | 1 | 4  | no  | TE |
| at_locus.06662 | 4 | 3,257,015 | 3,257,037 | 3  | 1 | 4  | no  | TE |
| at_locus.06663 | 4 | 3,259,607 | 3,259,629 | 3  | 1 | 4  | no  | TE |
| at_locus.06664 | 4 | 3,260,621 | 3,260,643 | 3  | 1 | 4  | no  | TE |
| at_locus.06665 | 4 | 3,262,934 | 3,263,019 | 3  | 0 | 0  | no  |    |
| at_locus.06666 | 4 | 3,263,297 | 3,263,726 | 0  | 0 | 7  | no  | TE |
| at_locus.06667 | 4 | 3,263,803 | 3,264,240 | 11 | 0 | 11 | no  | TE |
| at_locus.06668 | 4 | 3,264,447 | 3,265,268 | 12 | 1 | 19 | no  | TE |
| at_locus.06669 | 4 | 3,267,530 | 3,267,726 | 4  | 0 | 6  | no  | TE |
| at_locus.06670 | 4 | 3,268,620 | 3,269,210 | 15 | 0 | 9  | no  | TE |
| at_locus.06671 | 4 | 3,270,015 | 3,270,575 | 11 | 3 | 8  | no  | TE |
| at_locus.06672 | 4 | 3,273,067 | 3,273,203 | 4  | 0 | 5  | no  | TE |
| at_locus.06673 | 4 | 3,274,432 | 3,275,008 | 15 | 0 | 10 | no  | TE |
| at_locus.06674 | 4 | 3,275,313 | 3,276,165 | 30 | 0 | 28 | no  | TE |
| at_locus.06675 | 4 | 3,276,414 | 3,277,076 | 9  | 0 | 13 | no  | TE |
| at_locus.06676 | 4 | 3,277,414 | 3,277,856 | 2  | 0 | 6  | yes | TE |

|                |   |           |           |    |   |    |     |    |
|----------------|---|-----------|-----------|----|---|----|-----|----|
| at_locus.06677 | 4 | 3,278,214 | 3,278,490 | 5  | 0 | 1  | no  | TE |
| at_locus.06678 | 4 | 3,278,854 | 3,279,245 | 4  | 0 | 10 | no  | TE |
| at_locus.06679 | 4 | 3,279,693 | 3,279,881 | 8  | 1 | 0  | yes | TE |
| at_locus.06680 | 4 | 3,280,200 | 3,283,315 | 49 | 0 | 50 | yes | TE |
| at_locus.06681 | 4 | 3,283,656 | 3,284,656 | 27 | 0 | 14 | no  | TE |
| at_locus.06682 | 4 | 3,284,961 | 3,285,144 | 7  | 0 | 7  | no  | TE |
| at_locus.06683 | 4 | 3,310,227 | 3,310,411 | 10 | 3 | 4  | no  | TE |
| at_locus.06684 | 4 | 3,310,942 | 3,311,253 | 2  | 0 | 4  | no  | TE |
| at_locus.06685 | 4 | 3,311,649 | 3,311,678 | 0  | 0 | 4  | no  | TE |
| at_locus.06686 | 4 | 3,313,123 | 3,313,250 | 9  | 3 | 4  | no  | TE |
| at_locus.06687 | 4 | 3,313,506 | 3,313,799 | 1  | 0 | 5  | no  | TE |
| at_locus.06688 | 4 | 3,314,622 | 3,314,884 | 1  | 0 | 4  | yes | TE |
| at_locus.06689 | 4 | 3,322,553 | 3,322,733 | 5  | 0 | 0  | yes | TE |
| at_locus.06690 | 4 | 3,326,736 | 3,327,099 | 0  | 0 | 4  | no  | TE |
| at_locus.06691 | 4 | 3,333,365 | 3,333,784 | 7  | 0 | 2  | no  | TE |
| at_locus.06692 | 4 | 3,345,133 | 3,345,605 | 1  | 0 | 10 | no  | TE |
| at_locus.06693 | 4 | 3,345,817 | 3,346,052 | 4  | 0 | 4  | no  | TE |
| at_locus.06694 | 4 | 3,346,509 | 3,346,972 | 2  | 0 | 7  | no  | TE |
| at_locus.06695 | 4 | 3,347,449 | 3,347,804 | 6  | 0 | 9  | no  | TE |
| at_locus.06696 | 4 | 3,348,013 | 3,348,663 | 18 | 1 | 10 | no  | TE |
| at_locus.06697 | 4 | 3,349,866 | 3,350,407 | 3  | 0 | 9  | no  | TE |
| at_locus.06698 | 4 | 3,350,810 | 3,351,147 | 0  | 0 | 6  | yes | TE |
| at_locus.06699 | 4 | 3,351,545 | 3,351,603 | 2  | 0 | 6  | no  | TE |
| at_locus.06700 | 4 | 3,351,924 | 3,352,306 | 3  | 0 | 5  | no  | TE |
| at_locus.06701 | 4 | 3,352,841 | 3,352,985 | 1  | 0 | 4  | no  | TE |
| at_locus.06702 | 4 | 3,353,296 | 3,353,578 | 3  | 0 | 4  | no  | TE |
| at_locus.06703 | 4 | 3,353,994 | 3,354,027 | 1  | 0 | 4  | no  | TE |
| at_locus.06704 | 4 | 3,354,239 | 3,354,264 | 1  | 0 | 5  | no  | TE |
| at_locus.06705 | 4 | 3,354,536 | 3,354,725 | 4  | 0 | 4  | no  | TE |
| at_locus.06706 | 4 | 3,359,211 | 3,359,519 | 15 | 0 | 0  | no  | TE |
| at_locus.06707 | 4 | 3,360,022 | 3,360,258 | 17 | 2 | 4  | no  | TE |
| at_locus.06708 | 4 | 3,374,840 | 3,375,058 | 3  | 0 | 7  | no  | TE |
| at_locus.06709 | 4 | 3,375,335 | 3,375,563 | 1  | 0 | 5  | no  | TE |
| at_locus.06710 | 4 | 3,381,808 | 3,382,192 | 5  | 0 | 6  | yes | TE |
| at_locus.06711 | 4 | 3,382,856 | 3,383,124 | 4  | 0 | 2  | no  | TE |
| at_locus.06712 | 4 | 3,383,297 | 3,383,326 | 0  | 0 | 4  | no  | TE |
| at_locus.06713 | 4 | 3,384,268 | 3,384,747 | 7  | 0 | 16 | yes | TE |

|                |   |           |           |    |   |    |     |    |
|----------------|---|-----------|-----------|----|---|----|-----|----|
| at_locus.06714 | 4 | 3,387,680 | 3,388,311 | 3  | 0 | 11 | no  | TE |
| at_locus.06715 | 4 | 3,388,367 | 3,388,865 | 7  | 0 | 2  | no  | TE |
| at_locus.06716 | 4 | 3,389,316 | 3,389,450 | 0  | 0 | 4  | no  | TE |
| at_locus.06717 | 4 | 3,390,456 | 3,391,223 | 12 | 1 | 14 | no  | TE |
| at_locus.06718 | 4 | 3,396,407 | 3,396,953 | 5  | 0 | 5  | no  | TE |
| at_locus.06719 | 4 | 3,408,829 | 3,409,263 | 13 | 0 | 0  | no  | TE |
| at_locus.06720 | 4 | 3,438,269 | 3,438,971 | 5  | 1 | 7  | yes | TE |
| at_locus.06721 | 4 | 3,453,157 | 3,453,582 | 5  | 0 | 0  | yes | TE |
| at_locus.06722 | 4 | 3,455,277 | 3,457,161 | 15 | 0 | 18 | yes | TE |
| at_locus.06723 | 4 | 3,467,851 | 3,468,432 | 2  | 0 | 8  | yes | TE |
| at_locus.06724 | 4 | 3,468,621 | 3,469,003 | 4  | 0 | 1  | yes | TE |
| at_locus.06725 | 4 | 3,471,480 | 3,471,741 | 6  | 0 | 3  | yes | TE |
| at_locus.06726 | 4 | 3,482,083 | 3,482,649 | 2  | 0 | 8  | no  | TE |
| at_locus.06727 | 4 | 3,487,017 | 3,487,320 | 4  | 0 | 1  | no  | TE |
| at_locus.06728 | 4 | 3,487,511 | 3,487,725 | 2  | 0 | 9  | no  | TE |
| at_locus.06729 | 4 | 3,490,458 | 3,490,631 | 5  | 0 | 11 | no  | TE |
| at_locus.06730 | 4 | 3,491,325 | 3,491,654 | 5  | 0 | 13 | no  | TE |
| at_locus.06731 | 4 | 3,492,015 | 3,492,146 | 7  | 0 | 9  | no  | TE |
| at_locus.06732 | 4 | 3,492,350 | 3,493,006 | 14 | 0 | 15 | no  | TE |
| at_locus.06733 | 4 | 3,493,429 | 3,493,586 | 1  | 0 | 6  | no  | TE |
| at_locus.06734 | 4 | 3,494,324 | 3,494,459 | 1  | 0 | 4  | no  | TE |
| at_locus.06735 | 4 | 3,495,759 | 3,497,156 | 23 | 0 | 32 | no  | TE |
| at_locus.06736 | 4 | 3,508,000 | 3,508,228 | 8  | 0 | 7  | yes | TE |
| at_locus.06737 | 4 | 3,510,448 | 3,510,772 | 7  | 1 | 6  | yes | TE |
| at_locus.06738 | 4 | 3,511,139 | 3,511,239 | 1  | 0 | 4  | yes | TE |
| at_locus.06739 | 4 | 3,511,461 | 3,511,779 | 4  | 0 | 5  | yes |    |
| at_locus.06740 | 4 | 3,527,971 | 3,528,322 | 0  | 0 | 5  | yes | TE |
| at_locus.06741 | 4 | 3,528,894 | 3,529,872 | 15 | 1 | 9  | yes | TE |
| at_locus.06742 | 4 | 3,531,964 | 3,532,259 | 1  | 0 | 6  | yes | TE |
| at_locus.06743 | 4 | 3,532,934 | 3,534,073 | 1  | 0 | 5  | yes | TE |
| at_locus.06744 | 4 | 3,537,288 | 3,538,267 | 16 | 1 | 17 | no  | TE |
| at_locus.06745 | 4 | 3,538,721 | 3,539,030 | 10 | 0 | 10 | no  | TE |
| at_locus.06746 | 4 | 3,539,315 | 3,541,320 | 55 | 6 | 53 | yes | TE |
| at_locus.06747 | 4 | 3,542,463 | 3,542,694 | 6  | 0 | 5  | no  | TE |
| at_locus.06748 | 4 | 3,543,293 | 3,543,929 | 11 | 0 | 5  | no  | TE |
| at_locus.06749 | 4 | 3,544,119 | 3,547,516 | 35 | 2 | 58 | yes | TE |
| at_locus.06750 | 4 | 3,548,027 | 3,548,263 | 1  | 0 | 6  | no  | TE |

|                |   |           |           |    |   |    |     |    |
|----------------|---|-----------|-----------|----|---|----|-----|----|
| at_locus.06751 | 4 | 3,550,466 | 3,550,732 | 0  | 0 | 4  | yes | TE |
| at_locus.06752 | 4 | 3,553,744 | 3,554,366 | 9  | 0 | 13 | no  | TE |
| at_locus.06753 | 4 | 3,554,752 | 3,555,192 | 9  | 0 | 6  | no  | TE |
| at_locus.06754 | 4 | 3,556,802 | 3,557,092 | 1  | 0 | 3  | no  | TE |
| at_locus.06755 | 4 | 3,559,023 | 3,559,452 | 0  | 0 | 4  | yes | TE |
| at_locus.06756 | 4 | 3,562,613 | 3,562,914 | 2  | 0 | 4  | no  | TE |
| at_locus.06757 | 4 | 3,563,280 | 3,563,413 | 0  | 0 | 5  | no  | TE |
| at_locus.06758 | 4 | 3,563,611 | 3,563,829 | 7  | 0 | 4  | no  | TE |
| at_locus.06759 | 4 | 3,567,184 | 3,567,566 | 6  | 0 | 1  | no  | TE |
| at_locus.06760 | 4 | 3,567,826 | 3,568,161 | 5  | 0 | 4  | no  | TE |
| at_locus.06761 | 4 | 3,568,953 | 3,569,372 | 3  | 0 | 7  | no  | TE |
| at_locus.06762 | 4 | 3,569,637 | 3,569,707 | 4  | 0 | 0  | no  | TE |
| at_locus.06763 | 4 | 3,584,291 | 3,584,365 | 4  | 0 | 0  | no  | TE |
| at_locus.06764 | 4 | 3,589,650 | 3,590,235 | 3  | 0 | 11 | no  | TE |
| at_locus.06765 | 4 | 3,591,418 | 3,591,646 | 4  | 0 | 0  | no  | TE |
| at_locus.06766 | 4 | 3,591,997 | 3,592,445 | 13 | 0 | 16 | no  | TE |
| at_locus.06767 | 4 | 3,595,065 | 3,595,438 | 4  | 0 | 0  | no  | TE |
| at_locus.06768 | 4 | 3,595,570 | 3,595,856 | 2  | 0 | 5  | no  | TE |
| at_locus.06769 | 4 | 3,597,153 | 3,597,217 | 1  | 0 | 5  | no  | TE |
| at_locus.06770 | 4 | 3,599,786 | 3,600,016 | 0  | 0 | 4  | no  | TE |
| at_locus.06771 | 4 | 3,610,886 | 3,611,383 | 0  | 0 | 4  | no  | TE |
| at_locus.06772 | 4 | 3,612,137 | 3,612,496 | 9  | 0 | 6  | no  | TE |
| at_locus.06773 | 4 | 3,612,694 | 3,612,849 | 0  | 0 | 4  | no  | TE |
| at_locus.06774 | 4 | 3,613,063 | 3,613,550 | 7  | 0 | 4  | no  | TE |
| at_locus.06775 | 4 | 3,615,794 | 3,615,876 | 4  | 0 | 0  | no  | TE |
| at_locus.06776 | 4 | 3,616,109 | 3,616,354 | 1  | 0 | 4  | yes | TE |
| at_locus.06777 | 4 | 3,617,411 | 3,617,939 | 12 | 0 | 6  | no  | TE |
| at_locus.06778 | 4 | 3,618,759 | 3,619,131 | 3  | 0 | 6  | no  | TE |
| at_locus.06779 | 4 | 3,630,933 | 3,631,137 | 5  | 0 | 7  | no  | TE |
| at_locus.06780 | 4 | 3,656,077 | 3,656,234 | 4  | 0 | 2  | yes | TE |
| at_locus.06781 | 4 | 3,661,022 | 3,661,421 | 9  | 0 | 2  | no  | TE |
| at_locus.06782 | 4 | 3,662,045 | 3,662,362 | 4  | 0 | 1  | no  | TE |
| at_locus.06783 | 4 | 3,676,028 | 3,677,652 | 23 | 3 | 42 | yes | TE |
| at_locus.06784 | 4 | 3,692,088 | 3,692,910 | 12 | 0 | 12 | no  | TE |
| at_locus.06785 | 4 | 3,693,346 | 3,693,383 | 4  | 0 | 1  | no  | TE |
| at_locus.06786 | 4 | 3,693,603 | 3,694,106 | 9  | 0 | 7  | no  | TE |
| at_locus.06787 | 4 | 3,694,347 | 3,694,798 | 2  | 0 | 5  | no  | TE |

|                |   |           |           |    |   |    |     |    |
|----------------|---|-----------|-----------|----|---|----|-----|----|
| at_locus.06788 | 4 | 3,696,159 | 3,696,264 | 7  | 0 | 2  | no  | TE |
| at_locus.06789 | 4 | 3,696,806 | 3,697,078 | 10 | 0 | 8  | no  | TE |
| at_locus.06790 | 4 | 3,697,928 | 3,698,011 | 1  | 0 | 4  | yes | TE |
| at_locus.06791 | 4 | 3,698,642 | 3,698,679 | 2  | 0 | 6  | no  | TE |
| at_locus.06792 | 4 | 3,699,219 | 3,700,009 | 14 | 0 | 8  | no  | TE |
| at_locus.06793 | 4 | 3,700,215 | 3,700,610 | 6  | 0 | 6  | yes | TE |
| at_locus.06794 | 4 | 3,700,849 | 3,701,228 | 11 | 0 | 13 | no  | TE |
| at_locus.06795 | 4 | 3,701,658 | 3,703,013 | 29 | 1 | 28 | no  | TE |
| at_locus.06796 | 4 | 3,703,199 | 3,703,831 | 10 | 0 | 16 | yes | TE |
| at_locus.06797 | 4 | 3,731,668 | 3,731,793 | 18 | 0 | 0  | no  | TE |
| at_locus.06798 | 4 | 3,731,944 | 3,732,343 | 1  | 0 | 3  | yes | TE |
| at_locus.06799 | 4 | 3,732,590 | 3,732,746 | 19 | 0 | 2  | no  | TE |
| at_locus.06800 | 4 | 3,733,953 | 3,734,179 | 4  | 0 | 0  | no  | TE |
| at_locus.06801 | 4 | 3,736,065 | 3,737,352 | 34 | 3 | 46 | no  | TE |
| at_locus.06802 | 4 | 3,737,561 | 3,738,263 | 15 | 1 | 15 | no  | TE |
| at_locus.06803 | 4 | 3,738,696 | 3,740,692 | 44 | 0 | 45 | no  | TE |
| at_locus.06804 | 4 | 3,741,022 | 3,741,450 | 7  | 0 | 5  | no  | TE |
| at_locus.06805 | 4 | 3,742,222 | 3,742,584 | 5  | 0 | 5  | no  | TE |
| at_locus.06806 | 4 | 3,742,976 | 3,743,005 | 2  | 0 | 4  | no  | TE |
| at_locus.06807 | 4 | 3,743,212 | 3,743,445 | 0  | 0 | 4  | no  | TE |
| at_locus.06808 | 4 | 3,743,711 | 3,743,811 | 6  | 0 | 2  | no  | TE |
| at_locus.06809 | 4 | 3,745,372 | 3,747,702 | 37 | 0 | 25 | no  | TE |
| at_locus.06810 | 4 | 3,747,771 | 3,749,596 | 32 | 3 | 56 | no  | TE |
| at_locus.06811 | 4 | 3,749,805 | 3,750,010 | 3  | 0 | 6  | no  | TE |
| at_locus.06812 | 4 | 3,753,804 | 3,754,030 | 4  | 0 | 0  | no  | TE |
| at_locus.06813 | 4 | 3,767,839 | 3,769,164 | 45 | 2 | 60 | yes | TE |
| at_locus.06814 | 4 | 3,775,575 | 3,775,723 | 0  | 0 | 4  | yes | TE |
| at_locus.06815 | 4 | 3,799,615 | 3,799,977 | 1  | 1 | 4  | no  | TE |
| at_locus.06816 | 4 | 3,806,211 | 3,806,812 | 8  | 0 | 7  | yes |    |
| at_locus.06817 | 4 | 3,807,490 | 3,807,731 | 2  | 0 | 8  | yes |    |
| at_locus.06818 | 4 | 3,808,338 | 3,808,640 | 7  | 0 | 3  | yes |    |
| at_locus.06819 | 4 | 3,810,034 | 3,810,163 | 6  | 0 | 1  | no  | TE |
| at_locus.06820 | 4 | 3,838,675 | 3,839,376 | 27 | 0 | 9  | no  | TE |
| at_locus.06821 | 4 | 3,839,991 | 3,840,437 | 4  | 0 | 5  | no  | TE |
| at_locus.06822 | 4 | 3,840,715 | 3,841,157 | 0  | 0 | 6  | yes | TE |
| at_locus.06823 | 4 | 3,842,784 | 3,843,209 | 1  | 0 | 8  | no  | TE |
| at_locus.06824 | 4 | 3,849,891 | 3,850,391 | 5  | 0 | 7  | no  | TE |

|                |   |           |           |    |   |    |     |    |
|----------------|---|-----------|-----------|----|---|----|-----|----|
| at_locus.06825 | 4 | 3,850,622 | 3,851,160 | 26 | 0 | 9  | yes | TE |
| at_locus.06826 | 4 | 3,851,571 | 3,852,194 | 5  | 0 | 7  | no  | TE |
| at_locus.06827 | 4 | 3,866,100 | 3,866,600 | 5  | 0 | 7  | no  | TE |
| at_locus.06828 | 4 | 3,866,831 | 3,867,369 | 26 | 0 | 8  | no  | TE |
| at_locus.06829 | 4 | 3,867,778 | 3,868,491 | 5  | 0 | 8  | no  | TE |
| at_locus.06830 | 4 | 3,868,768 | 3,869,203 | 0  | 0 | 5  | no  | TE |
| at_locus.06831 | 4 | 3,870,830 | 3,871,255 | 1  | 0 | 8  | no  | TE |
| at_locus.06832 | 4 | 3,871,649 | 3,872,060 | 1  | 0 | 4  | no  | TE |
| at_locus.06833 | 4 | 3,875,068 | 3,875,568 | 4  | 0 | 7  | no  | TE |
| at_locus.06834 | 4 | 3,875,799 | 3,876,337 | 25 | 0 | 8  | no  | TE |
| at_locus.06835 | 4 | 3,876,877 | 3,877,445 | 5  | 0 | 2  | yes | TE |
| at_locus.06836 | 4 | 3,890,009 | 3,890,076 | 4  | 0 | 1  | no  | TE |
| at_locus.06837 | 4 | 3,904,352 | 3,904,830 | 3  | 0 | 7  | no  | TE |
| at_locus.06838 | 4 | 3,929,524 | 3,929,851 | 5  | 0 | 2  | no  | TE |
| at_locus.06839 | 4 | 3,930,237 | 3,930,393 | 0  | 0 | 4  | no  | TE |
| at_locus.06840 | 4 | 3,930,728 | 3,930,950 | 3  | 0 | 5  | no  | TE |
| at_locus.06841 | 4 | 3,933,386 | 3,934,132 | 12 | 0 | 7  | no  | TE |
| at_locus.06842 | 4 | 3,946,072 | 3,946,563 | 0  | 0 | 7  | no  | TE |
| at_locus.06843 | 4 | 3,948,115 | 3,948,185 | 4  | 0 | 0  | no  | TE |
| at_locus.06844 | 4 | 3,950,374 | 3,956,014 | 53 | 4 | 94 | yes | TE |
| at_locus.06845 | 4 | 3,957,040 | 3,957,558 | 12 | 0 | 13 | no  | TE |
| at_locus.06846 | 4 | 3,957,690 | 3,958,519 | 15 | 1 | 15 | no  | TE |
| at_locus.06847 | 4 | 3,958,929 | 3,959,308 | 11 | 0 | 13 | no  | TE |
| at_locus.06848 | 4 | 3,959,520 | 3,960,274 | 9  | 0 | 21 | yes | TE |
| at_locus.06849 | 4 | 3,960,332 | 3,961,230 | 37 | 2 | 32 | no  | TE |
| at_locus.06850 | 4 | 3,961,541 | 3,961,593 | 7  | 0 | 0  | no  | TE |
| at_locus.06851 | 4 | 3,963,669 | 3,964,334 | 13 | 0 | 8  | no  | TE |
| at_locus.06852 | 4 | 3,964,567 | 3,965,383 | 10 | 1 | 16 | no  | TE |
| at_locus.06853 | 4 | 3,965,633 | 3,965,986 | 23 | 2 | 19 | no  | TE |
| at_locus.06854 | 4 | 3,966,133 | 3,988,504 | 54 | 2 | 48 | yes | TE |
| at_locus.06855 | 4 | 3,988,751 | 3,989,464 | 5  | 0 | 8  | yes | TE |
| at_locus.06856 | 4 | 3,989,741 | 3,990,181 | 0  | 0 | 5  | no  | TE |
| at_locus.06857 | 4 | 3,991,808 | 3,992,233 | 1  | 0 | 8  | no  | TE |
| at_locus.06858 | 4 | 3,992,627 | 3,993,030 | 1  | 0 | 4  | no  | TE |
| at_locus.06859 | 4 | 3,996,446 | 3,997,147 | 22 | 0 | 7  | no  | TE |
| at_locus.06860 | 4 | 3,997,394 | 4,012,875 | 43 | 5 | 54 | yes | TE |
| at_locus.06861 | 4 | 4,013,116 | 4,015,618 | 28 | 3 | 18 | yes | TE |

|                |   |           |           |    |   |    |     |    |
|----------------|---|-----------|-----------|----|---|----|-----|----|
| at_locus.06862 | 4 | 4,015,629 | 4,017,969 | 34 | 0 | 37 | yes | TE |
| at_locus.06863 | 4 | 4,018,311 | 4,018,369 | 14 | 0 | 12 | no  | TE |
| at_locus.06864 | 4 | 4,018,603 | 4,020,028 | 18 | 0 | 26 | no  | TE |
| at_locus.06865 | 4 | 4,020,263 | 4,020,967 | 13 | 0 | 10 | yes | TE |
| at_locus.06866 | 4 | 4,022,659 | 4,023,118 | 7  | 0 | 11 | yes | TE |
| at_locus.06867 | 4 | 4,023,584 | 4,023,854 | 4  | 0 | 3  | no  | TE |
| at_locus.06868 | 4 | 4,024,438 | 4,024,585 | 6  | 0 | 0  | no  | TE |
| at_locus.06869 | 4 | 4,024,635 | 4,026,775 | 32 | 0 | 27 | no  | TE |
| at_locus.06870 | 4 | 4,027,308 | 4,027,657 | 0  | 0 | 4  | no  | TE |
| at_locus.06871 | 4 | 4,029,116 | 4,029,425 | 2  | 0 | 4  | yes | TE |
| at_locus.06872 | 4 | 4,031,661 | 4,032,117 | 5  | 0 | 6  | no  | TE |
| at_locus.06873 | 4 | 4,032,371 | 4,033,426 | 21 | 0 | 17 | no  | TE |
| at_locus.06874 | 4 | 4,033,621 | 4,034,623 | 22 | 0 | 11 | no  | TE |
| at_locus.06875 | 4 | 4,035,146 | 4,036,808 | 33 | 3 | 40 | no  | TE |
| at_locus.06876 | 4 | 4,037,413 | 4,038,283 | 8  | 1 | 14 | yes | TE |
| at_locus.06877 | 4 | 4,038,879 | 4,038,946 | 6  | 0 | 5  | no  | TE |
| at_locus.06878 | 4 | 4,039,502 | 4,039,829 | 3  | 0 | 8  | no  | TE |
| at_locus.06879 | 4 | 4,041,132 | 4,044,001 | 56 | 4 | 59 | yes | TE |
| at_locus.06880 | 4 | 4,044,214 | 4,044,326 | 1  | 0 | 4  | no  | TE |
| at_locus.06881 | 4 | 4,044,600 | 4,045,210 | 6  | 0 | 12 | no  | TE |
| at_locus.06882 | 4 | 4,045,702 | 4,047,052 | 31 | 4 | 31 | no  | TE |
| at_locus.06883 | 4 | 4,047,264 | 4,049,150 | 29 | 3 | 16 | yes | TE |
| at_locus.06884 | 4 | 4,051,565 | 4,051,907 | 4  | 0 | 3  | no  | TE |
| at_locus.06885 | 4 | 4,052,993 | 4,053,164 | 4  | 0 | 1  | no  | TE |
| at_locus.06886 | 4 | 4,053,392 | 4,055,236 | 28 | 3 | 18 | yes | TE |
| at_locus.06887 | 4 | 4,055,461 | 4,055,935 | 7  | 1 | 3  | yes | TE |
| at_locus.06888 | 4 | 4,056,108 | 4,056,856 | 9  | 1 | 8  | no  | TE |
| at_locus.06889 | 4 | 4,057,014 | 4,058,509 | 25 | 3 | 11 | no  | TE |
| at_locus.06890 | 4 | 4,059,098 | 4,059,420 | 8  | 0 | 3  | no  | TE |
| at_locus.06891 | 4 | 4,059,624 | 4,062,083 | 31 | 4 | 17 | yes | TE |
| at_locus.06892 | 4 | 4,062,302 | 4,063,582 | 20 | 3 | 8  | no  | TE |
| at_locus.06893 | 4 | 4,063,904 | 4,066,084 | 32 | 3 | 17 | yes | TE |
| at_locus.06894 | 4 | 4,066,392 | 4,067,203 | 14 | 3 | 8  | yes | TE |
| at_locus.06895 | 4 | 4,067,425 | 4,069,406 | 34 | 3 | 11 | yes | TE |
| at_locus.06896 | 4 | 4,087,757 | 4,088,012 | 7  | 1 | 0  | yes | TE |
| at_locus.06897 | 4 | 4,090,193 | 4,090,272 | 4  | 0 | 0  | yes |    |
| at_locus.06898 | 4 | 4,091,392 | 4,091,430 | 5  | 0 | 10 | yes |    |



|                |   |           |           |     |    |     |     |    |
|----------------|---|-----------|-----------|-----|----|-----|-----|----|
| at_locus.06899 | 4 | 4,092,253 | 4,092,449 | 1   | 0  | 4   | yes |    |
| at_locus.06900 | 4 | 4,094,264 | 4,094,814 | 12  | 0  | 2   | no  | TE |
| at_locus.06901 | 4 | 4,095,032 | 4,096,678 | 20  | 1  | 11  | no  | TE |
| at_locus.06902 | 4 | 4,097,736 | 4,097,874 | 35  | 0  | 3   | no  | TE |
| at_locus.06903 | 4 | 4,099,326 | 4,100,895 | 24  | 0  | 29  | yes | TE |
| at_locus.06904 | 4 | 4,101,160 | 4,101,768 | 6   | 0  | 17  | yes | TE |
| at_locus.06905 | 4 | 4,102,046 | 4,103,131 | 7   | 0  | 19  | yes | TE |
| at_locus.06906 | 4 | 4,103,848 | 4,106,089 | 553 | 11 | 192 | yes | TE |
| at_locus.06907 | 4 | 4,106,508 | 4,107,501 | 66  | 2  | 76  | yes | TE |
| at_locus.06908 | 4 | 4,108,405 | 4,108,937 | 2   | 0  | 6   | yes | TE |
| at_locus.06909 | 4 | 4,110,150 | 4,110,285 | 1   | 2  | 4   | yes | TE |
| at_locus.06910 | 4 | 4,125,653 | 4,125,676 | 4   | 0  | 1   | no  | TE |
| at_locus.06911 | 4 | 4,126,373 | 4,126,487 | 4   | 0  | 0   | no  | TE |
| at_locus.06912 | 4 | 4,127,098 | 4,127,305 | 0   | 0  | 5   | no  | TE |
| at_locus.06913 | 4 | 4,136,087 | 4,136,110 | 4   | 0  | 0   | no  | TE |
| at_locus.06914 | 4 | 4,146,123 | 4,146,165 | 9   | 0  | 0   | no  | TE |
| at_locus.06915 | 4 | 4,146,886 | 4,147,117 | 5   | 0  | 0   | no  | TE |
| at_locus.06916 | 4 | 4,147,342 | 4,147,507 | 14  | 1  | 0   | no  | TE |
| at_locus.06917 | 4 | 4,147,885 | 4,148,177 | 38  | 3  | 0   | yes | TE |
| at_locus.06918 | 4 | 4,156,072 | 4,156,183 | 4   | 0  | 3   | no  | TE |
| at_locus.06919 | 4 | 4,156,540 | 4,156,864 | 4   | 0  | 5   | no  | TE |
| at_locus.06920 | 4 | 4,157,020 | 4,157,721 | 9   | 0  | 7   | no  | TE |
| at_locus.06921 | 4 | 4,159,784 | 4,160,187 | 8   | 0  | 1   | no  | TE |
| at_locus.06922 | 4 | 4,161,502 | 4,161,635 | 4   | 0  | 3   | no  | TE |
| at_locus.06923 | 4 | 4,164,395 | 4,164,412 | 6   | 0  | 0   | yes | TE |
| at_locus.06924 | 4 | 4,176,085 | 4,177,280 | 17  | 0  | 23  | no  | TE |
| at_locus.06925 | 4 | 4,177,722 | 4,179,491 | 29  | 0  | 30  | yes | TE |
| at_locus.06926 | 4 | 4,182,213 | 4,182,544 | 12  | 0  | 7   | no  | TE |
| at_locus.06927 | 4 | 4,183,097 | 4,186,046 | 37  | 3  | 57  | no  | TE |
| at_locus.06928 | 4 | 4,190,946 | 4,191,193 | 0   | 0  | 5   | no  | TE |
| at_locus.06929 | 4 | 4,191,343 | 4,191,643 | 6   | 0  | 0   | no  | TE |
| at_locus.06930 | 4 | 4,208,004 | 4,208,281 | 1   | 0  | 5   | yes | TE |
| at_locus.06931 | 4 | 4,208,536 | 4,209,337 | 2   | 0  | 16  | yes | TE |
| at_locus.06932 | 4 | 4,209,794 | 4,210,027 | 12  | 0  | 15  | yes | TE |
| at_locus.06933 | 4 | 4,210,472 | 4,210,528 | 1   | 0  | 5   | no  | TE |
| at_locus.06934 | 4 | 4,219,317 | 4,219,372 | 0   | 0  | 4   | no  |    |
| at_locus.06935 | 4 | 4,220,040 | 4,220,396 | 4   | 2  | 7   | yes |    |

|                |   |           |           |    |   |    |     |    |
|----------------|---|-----------|-----------|----|---|----|-----|----|
| at_locus.06936 | 4 | 4,221,393 | 4,221,440 | 4  | 1 | 1  | yes | TE |
| at_locus.06937 | 4 | 4,223,061 | 4,223,529 | 1  | 0 | 4  | no  | TE |
| at_locus.06938 | 4 | 4,224,473 | 4,225,516 | 14 | 0 | 26 | yes | TE |
| at_locus.06939 | 4 | 4,227,787 | 4,228,358 | 8  | 0 | 15 | yes | TE |
| at_locus.06940 | 4 | 4,239,386 | 4,239,781 | 2  | 0 | 7  | no  | TE |
| at_locus.06941 | 4 | 4,240,171 | 4,240,672 | 21 | 0 | 8  | no  | TE |
| at_locus.06942 | 4 | 4,240,937 | 4,241,390 | 1  | 0 | 6  | no  | TE |
| at_locus.06943 | 4 | 4,244,595 | 4,244,849 | 0  | 0 | 4  | yes | TE |
| at_locus.06944 | 4 | 4,247,355 | 4,247,714 | 0  | 0 | 4  | no  | TE |
| at_locus.06945 | 4 | 4,247,992 | 4,248,197 | 1  | 0 | 4  | no  | TE |
| at_locus.06946 | 4 | 4,248,407 | 4,248,802 | 2  | 0 | 5  | no  | TE |
| at_locus.06947 | 4 | 4,249,188 | 4,249,730 | 12 | 0 | 6  | yes | TE |
| at_locus.06948 | 4 | 4,269,971 | 4,270,670 | 3  | 0 | 11 | no  | TE |
| at_locus.06949 | 4 | 4,271,734 | 4,271,940 | 0  | 0 | 4  | no  | TE |
| at_locus.06950 | 4 | 4,274,233 | 4,274,711 | 9  | 0 | 15 | yes | TE |
| at_locus.06951 | 4 | 4,278,910 | 4,279,608 | 0  | 0 | 8  | no  | TE |
| at_locus.06952 | 4 | 4,279,828 | 4,279,966 | 10 | 0 | 7  | no  | TE |
| at_locus.06953 | 4 | 4,281,064 | 4,281,231 | 0  | 0 | 5  | no  | TE |
| at_locus.06954 | 4 | 4,282,882 | 4,283,199 | 4  | 0 | 0  | no  | TE |
| at_locus.06955 | 4 | 4,283,387 | 4,283,954 | 1  | 0 | 12 | yes | TE |
| at_locus.06956 | 4 | 4,287,497 | 4,287,710 | 4  | 0 | 5  | no  | TE |
| at_locus.06957 | 4 | 4,287,884 | 4,288,329 | 5  | 0 | 1  | no  | TE |
| at_locus.06958 | 4 | 4,294,889 | 4,295,324 | 6  | 0 | 5  | no  | TE |
| at_locus.06959 | 4 | 4,304,269 | 4,304,292 | 4  | 0 | 0  | no  | TE |
| at_locus.06960 | 4 | 4,315,127 | 4,315,357 | 4  | 0 | 1  | no  |    |
| at_locus.06961 | 4 | 4,331,814 | 4,332,352 | 13 | 0 | 5  | no  | TE |
| at_locus.06962 | 4 | 4,336,007 | 4,336,217 | 1  | 0 | 6  | no  | TE |
| at_locus.06963 | 4 | 4,337,051 | 4,337,968 | 3  | 0 | 14 | no  | TE |
| at_locus.06964 | 4 | 4,338,560 | 4,340,769 | 8  | 0 | 55 | yes | TE |
| at_locus.06965 | 4 | 4,341,007 | 4,341,820 | 5  | 0 | 34 | yes | TE |
| at_locus.06966 | 4 | 4,343,376 | 4,343,955 | 11 | 2 | 15 | yes | TE |
| at_locus.06967 | 4 | 4,344,226 | 4,344,720 | 8  | 1 | 5  | yes | TE |
| at_locus.06968 | 4 | 4,344,766 | 4,344,981 | 10 | 1 | 0  | no  | TE |
| at_locus.06969 | 4 | 4,350,102 | 4,350,406 | 0  | 0 | 7  | yes | TE |
| at_locus.06970 | 4 | 4,351,547 | 4,351,829 | 0  | 0 | 4  | no  | TE |
| at_locus.06971 | 4 | 4,354,768 | 4,356,044 | 4  | 0 | 2  | no  | TE |
| at_locus.06972 | 4 | 4,362,632 | 4,362,896 | 4  | 0 | 0  | yes | TE |

|                |   |           |           |    |   |    |     |    |
|----------------|---|-----------|-----------|----|---|----|-----|----|
| at_locus.06973 | 4 | 4,372,328 | 4,372,480 | 5  | 0 | 0  | no  | TE |
| at_locus.06974 | 4 | 4,375,240 | 4,376,110 | 7  | 0 | 3  | yes | TE |
| at_locus.06975 | 4 | 4,380,221 | 4,380,534 | 4  | 0 | 3  | yes |    |
| at_locus.06976 | 4 | 4,385,749 | 4,386,127 | 10 | 0 | 11 | no  | TE |
| at_locus.06977 | 4 | 4,386,183 | 4,386,339 | 4  | 0 | 0  | no  | TE |
| at_locus.06978 | 4 | 4,387,556 | 4,387,844 | 1  | 0 | 6  | no  | TE |
| at_locus.06979 | 4 | 4,389,861 | 4,390,130 | 1  | 0 | 6  | yes | TE |
| at_locus.06980 | 4 | 4,390,705 | 4,391,124 | 4  | 0 | 3  | yes | TE |
| at_locus.06981 | 4 | 4,392,146 | 4,392,612 | 1  | 0 | 5  | no  | TE |
| at_locus.06982 | 4 | 4,393,787 | 4,394,275 | 10 | 0 | 9  | yes | TE |
| at_locus.06983 | 4 | 4,398,154 | 4,398,575 | 0  | 0 | 5  | yes | TE |
| at_locus.06984 | 4 | 4,398,901 | 4,398,952 | 0  | 0 | 7  | yes | TE |
| at_locus.06985 | 4 | 4,399,166 | 4,399,718 | 0  | 0 | 6  | yes | TE |
| at_locus.06986 | 4 | 4,401,604 | 4,401,776 | 5  | 0 | 3  | no  | TE |
| at_locus.06987 | 4 | 4,402,143 | 4,402,298 | 1  | 0 | 4  | no  | TE |
| at_locus.06988 | 4 | 4,402,949 | 4,403,573 | 4  | 0 | 10 | no  | TE |
| at_locus.06989 | 4 | 4,403,805 | 4,404,326 | 5  | 0 | 7  | yes | TE |
| at_locus.06990 | 4 | 4,404,649 | 4,404,711 | 1  | 0 | 4  | yes | TE |
| at_locus.06991 | 4 | 4,408,314 | 4,408,643 | 3  | 0 | 6  | yes | TE |
| at_locus.06992 | 4 | 4,408,970 | 4,409,061 | 0  | 0 | 5  | no  | TE |
| at_locus.06993 | 4 | 4,409,287 | 4,409,486 | 9  | 0 | 4  | no  | TE |
| at_locus.06994 | 4 | 4,410,450 | 4,410,737 | 4  | 0 | 2  | yes | TE |
| at_locus.06995 | 4 | 4,411,010 | 4,411,033 | 4  | 0 | 1  | no  | TE |
| at_locus.06996 | 4 | 4,415,807 | 4,416,413 | 2  | 0 | 6  | no  | TE |
| at_locus.06997 | 4 | 4,416,905 | 4,417,030 | 0  | 0 | 4  | no  | TE |
| at_locus.06998 | 4 | 4,417,221 | 4,417,751 | 9  | 0 | 14 | no  | TE |
| at_locus.06999 | 4 | 4,419,620 | 4,419,799 | 0  | 0 | 4  | yes | TE |
| at_locus.07000 | 4 | 4,422,532 | 4,423,668 | 15 | 0 | 8  | yes | TE |
| at_locus.07001 | 4 | 4,425,035 | 4,428,177 | 49 | 1 | 61 | no  | TE |
| at_locus.07002 | 4 | 4,428,430 | 4,428,514 | 5  | 0 | 1  | no  | TE |
| at_locus.07003 | 4 | 4,428,663 | 4,429,375 | 17 | 0 | 11 | yes | TE |
| at_locus.07004 | 4 | 4,430,084 | 4,431,422 | 30 | 1 | 40 | no  | TE |
| at_locus.07005 | 4 | 4,431,720 | 4,432,285 | 0  | 0 | 7  | no  | TE |
| at_locus.07006 | 4 | 4,432,567 | 4,433,496 | 15 | 0 | 15 | yes | TE |
| at_locus.07007 | 4 | 4,434,533 | 4,434,625 | 7  | 0 | 3  | no  | TE |
| at_locus.07008 | 4 | 4,434,834 | 4,435,054 | 0  | 0 | 4  | yes | TE |
| at_locus.07009 | 4 | 4,435,312 | 4,435,588 | 3  | 0 | 5  | yes | TE |

|                |   |           |           |    |   |    |     |    |
|----------------|---|-----------|-----------|----|---|----|-----|----|
| at_locus.07010 | 4 | 4,435,989 | 4,436,223 | 0  | 0 | 5  | no  | TE |
| at_locus.07011 | 4 | 4,436,449 | 4,436,831 | 5  | 0 | 2  | yes | TE |
| at_locus.07012 | 4 | 4,439,001 | 4,439,374 | 2  | 0 | 5  | no  | TE |
| at_locus.07013 | 4 | 4,440,521 | 4,440,861 | 1  | 0 | 9  | no  | TE |
| at_locus.07014 | 4 | 4,443,376 | 4,443,532 | 5  | 0 | 4  | no  | TE |
| at_locus.07015 | 4 | 4,468,754 | 4,469,111 | 0  | 0 | 5  | no  | TE |
| at_locus.07016 | 4 | 4,472,765 | 4,473,144 | 5  | 0 | 6  | no  | TE |
| at_locus.07017 | 4 | 4,473,590 | 4,473,889 | 6  | 0 | 8  | no  | TE |
| at_locus.07018 | 4 | 4,475,084 | 4,475,302 | 0  | 0 | 4  | no  | TE |
| at_locus.07019 | 4 | 4,480,266 | 4,480,838 | 6  | 0 | 6  | no  | TE |
| at_locus.07020 | 4 | 4,488,909 | 4,489,216 | 1  | 0 | 4  | no  | TE |
| at_locus.07021 | 4 | 4,513,587 | 4,513,671 | 3  | 2 | 4  | no  |    |
| at_locus.07022 | 4 | 4,514,696 | 4,514,719 | 5  | 0 | 0  | no  | TE |
| at_locus.07023 | 4 | 4,528,720 | 4,528,935 | 0  | 0 | 4  | no  | TE |
| at_locus.07024 | 4 | 4,529,969 | 4,530,160 | 9  | 0 | 12 | no  | TE |
| at_locus.07025 | 4 | 4,531,279 | 4,531,804 | 10 | 1 | 0  | no  | TE |
| at_locus.07026 | 4 | 4,532,063 | 4,532,394 | 4  | 0 | 12 | no  | TE |
| at_locus.07027 | 4 | 4,535,027 | 4,535,206 | 4  | 0 | 2  | yes | TE |
| at_locus.07028 | 4 | 4,547,002 | 4,548,158 | 10 | 1 | 43 | yes | TE |
| at_locus.07029 | 4 | 4,549,679 | 4,549,731 | 0  | 0 | 6  | no  | TE |
| at_locus.07030 | 4 | 4,555,225 | 4,555,298 | 2  | 0 | 8  | no  | TE |
| at_locus.07031 | 4 | 4,555,819 | 4,555,967 | 6  | 0 | 3  | no  | TE |
| at_locus.07032 | 4 | 4,556,211 | 4,557,800 | 30 | 0 | 31 | no  | TE |
| at_locus.07033 | 4 | 4,558,251 | 4,558,952 | 12 | 1 | 15 | no  | TE |
| at_locus.07034 | 4 | 4,559,238 | 4,560,399 | 17 | 3 | 24 | no  | TE |
| at_locus.07035 | 4 | 4,561,404 | 4,561,740 | 9  | 0 | 8  | no  | TE |
| at_locus.07036 | 4 | 4,562,218 | 4,562,470 | 8  | 0 | 2  | no  | TE |
| at_locus.07037 | 4 | 4,564,041 | 4,564,902 | 15 | 0 | 10 | no  | TE |
| at_locus.07038 | 4 | 4,565,637 | 4,566,087 | 4  | 0 | 10 | no  | TE |
| at_locus.07039 | 4 | 4,566,243 | 4,567,144 | 9  | 3 | 12 | no  | TE |
| at_locus.07040 | 4 | 4,597,715 | 4,597,799 | 1  | 0 | 4  | yes | TE |
| at_locus.07041 | 4 | 4,602,519 | 4,602,664 | 7  | 0 | 8  | no  | TE |
| at_locus.07042 | 4 | 4,609,460 | 4,609,746 | 4  | 0 | 0  | no  | TE |
| at_locus.07043 | 4 | 4,609,820 | 4,610,541 | 6  | 0 | 10 | no  | TE |
| at_locus.07044 | 4 | 4,642,927 | 4,643,275 | 5  | 0 | 0  | yes |    |
| at_locus.07045 | 4 | 4,645,516 | 4,645,885 | 43 | 0 | 7  | no  | TE |
| at_locus.07046 | 4 | 4,646,316 | 4,647,498 | 27 | 0 | 33 | yes | TE |

|                |   |           |           |    |   |    |     |    |
|----------------|---|-----------|-----------|----|---|----|-----|----|
| at_locus.07047 | 4 | 4,648,092 | 4,648,234 | 6  | 0 | 3  | no  | TE |
| at_locus.07048 | 4 | 4,649,265 | 4,649,487 | 4  | 0 | 0  | no  | TE |
| at_locus.07049 | 4 | 4,650,144 | 4,650,256 | 5  | 0 | 1  | no  |    |
| at_locus.07050 | 4 | 4,657,460 | 4,657,920 | 0  | 0 | 7  | yes | TE |
| at_locus.07051 | 4 | 4,663,385 | 4,663,495 | 4  | 0 | 0  | no  | TE |
| at_locus.07052 | 4 | 4,677,347 | 4,677,632 | 32 | 0 | 3  | no  | TE |
| at_locus.07053 | 4 | 4,679,487 | 4,679,748 | 0  | 0 | 4  | no  | TE |
| at_locus.07054 | 4 | 4,680,092 | 4,680,595 | 2  | 0 | 16 | no  | TE |
| at_locus.07055 | 4 | 4,680,785 | 4,681,393 | 7  | 0 | 11 | no  | TE |
| at_locus.07056 | 4 | 4,681,663 | 4,681,774 | 1  | 0 | 7  | yes | TE |
| at_locus.07057 | 4 | 4,682,020 | 4,682,294 | 2  | 0 | 5  | no  | TE |
| at_locus.07058 | 4 | 4,683,242 | 4,683,380 | 32 | 0 | 3  | no  | TE |
| at_locus.07059 | 4 | 4,685,672 | 4,685,938 | 5  | 0 | 1  | no  |    |
| at_locus.07060 | 4 | 4,688,888 | 4,689,629 | 18 | 0 | 13 | no  | TE |
| at_locus.07061 | 4 | 4,689,861 | 4,690,165 | 36 | 0 | 2  | no  | TE |
| at_locus.07062 | 4 | 4,690,630 | 4,690,741 | 5  | 0 | 1  | no  | TE |
| at_locus.07063 | 4 | 4,705,801 | 4,706,033 | 4  | 0 | 4  | no  | TE |
| at_locus.07064 | 4 | 4,706,323 | 4,707,212 | 6  | 1 | 18 | no  | TE |
| at_locus.07065 | 4 | 4,707,637 | 4,708,478 | 13 | 0 | 20 | yes | TE |
| at_locus.07066 | 4 | 4,708,955 | 4,709,586 | 13 | 0 | 10 | yes | TE |
| at_locus.07067 | 4 | 4,709,876 | 4,710,300 | 4  | 0 | 8  | no  | TE |
| at_locus.07068 | 4 | 4,710,553 | 4,711,101 | 14 | 0 | 15 | yes | TE |
| at_locus.07069 | 4 | 4,717,499 | 4,718,013 | 8  | 0 | 0  | no  | TE |
| at_locus.07070 | 4 | 4,737,181 | 4,737,537 | 5  | 0 | 1  | no  | TE |
| at_locus.07071 | 4 | 4,741,621 | 4,741,912 | 5  | 0 | 1  | no  | TE |
| at_locus.07072 | 4 | 4,748,909 | 4,748,970 | 0  | 0 | 5  | no  | TE |
| at_locus.07073 | 4 | 4,749,538 | 4,749,561 | 1  | 0 | 4  | no  | TE |
| at_locus.07074 | 4 | 4,757,888 | 4,759,071 | 14 | 3 | 18 | no  | TE |
| at_locus.07075 | 4 | 4,759,784 | 4,760,003 | 1  | 0 | 6  | no  | TE |
| at_locus.07076 | 4 | 4,761,346 | 4,761,554 | 4  | 0 | 3  | no  | TE |
| at_locus.07077 | 4 | 4,762,377 | 4,762,454 | 0  | 0 | 5  | no  | TE |
| at_locus.07078 | 4 | 4,765,451 | 4,765,630 | 0  | 0 | 4  | yes | TE |
| at_locus.07079 | 4 | 4,768,707 | 4,770,334 | 23 | 1 | 22 | no  | TE |
| at_locus.07080 | 4 | 4,770,550 | 4,770,880 | 4  | 0 | 4  | no  | TE |
| at_locus.07081 | 4 | 4,771,115 | 4,772,253 | 13 | 1 | 14 | no  | TE |
| at_locus.07082 | 4 | 4,772,265 | 4,772,562 | 6  | 0 | 9  | no  | TE |
| at_locus.07083 | 4 | 4,773,118 | 4,773,985 | 11 | 0 | 7  | yes | TE |

|                |   |           |           |    |   |    |     |    |
|----------------|---|-----------|-----------|----|---|----|-----|----|
| at_locus.07084 | 4 | 4,774,640 | 4,776,968 | 69 | 5 | 62 | yes | TE |
| at_locus.07085 | 4 | 4,778,087 | 4,778,164 | 0  | 0 | 5  | no  | TE |
| at_locus.07086 | 4 | 4,778,721 | 4,778,945 | 5  | 0 | 4  | yes | TE |
| at_locus.07087 | 4 | 4,779,156 | 4,779,535 | 8  | 0 | 10 | no  | TE |
| at_locus.07088 | 4 | 4,780,020 | 4,780,046 | 4  | 0 | 0  | no  | TE |
| at_locus.07089 | 4 | 4,780,566 | 4,781,770 | 10 | 1 | 17 | no  | TE |
| at_locus.07090 | 4 | 4,785,986 | 4,786,025 | 17 | 1 | 1  | no  | TE |
| at_locus.07091 | 4 | 4,789,735 | 4,789,955 | 13 | 0 | 2  | no  | TE |
| at_locus.07092 | 4 | 4,796,725 | 4,796,837 | 4  | 0 | 0  | yes |    |
| at_locus.07093 | 4 | 4,809,512 | 4,809,939 | 5  | 0 | 7  | yes | TE |
| at_locus.07094 | 4 | 4,811,080 | 4,811,256 | 4  | 0 | 1  | no  | TE |
| at_locus.07095 | 4 | 4,815,047 | 4,815,286 | 6  | 0 | 0  | no  | TE |
| at_locus.07096 | 4 | 4,818,375 | 4,818,510 | 5  | 0 | 0  | no  | TE |
| at_locus.07097 | 4 | 4,821,462 | 4,821,757 | 8  | 0 | 1  | no  | TE |
| at_locus.07098 | 4 | 4,832,051 | 4,832,083 | 4  | 0 | 0  | no  | TE |
| at_locus.07099 | 4 | 4,833,442 | 4,833,568 | 1  | 0 | 4  | yes | TE |
| at_locus.07100 | 4 | 4,844,509 | 4,844,679 | 0  | 0 | 4  | yes |    |
| at_locus.07101 | 4 | 4,845,410 | 4,845,450 | 17 | 2 | 1  | no  |    |
| at_locus.07102 | 4 | 4,846,890 | 4,847,199 | 22 | 2 | 1  | no  |    |
| at_locus.07103 | 4 | 4,852,833 | 4,853,016 | 6  | 0 | 2  | no  | TE |
| at_locus.07104 | 4 | 4,854,321 | 4,854,609 | 0  | 0 | 4  | no  | TE |
| at_locus.07105 | 4 | 4,857,743 | 4,858,318 | 9  | 0 | 8  | no  | TE |
| at_locus.07106 | 4 | 4,858,522 | 4,858,599 | 0  | 0 | 4  | no  | TE |
| at_locus.07107 | 4 | 4,858,615 | 4,858,723 | 4  | 0 | 0  | no  | TE |
| at_locus.07108 | 4 | 4,858,925 | 4,859,641 | 7  | 0 | 5  | yes | TE |
| at_locus.07109 | 4 | 4,880,723 | 4,880,831 | 7  | 0 | 0  | yes | TE |
| at_locus.07110 | 4 | 4,889,479 | 4,889,509 | 8  | 0 | 1  | no  | TE |
| at_locus.07111 | 4 | 4,892,348 | 4,894,565 | 41 | 2 | 40 | no  | TE |
| at_locus.07112 | 4 | 4,894,757 | 4,895,349 | 9  | 0 | 12 | no  | TE |
| at_locus.07113 | 4 | 4,895,620 | 4,897,237 | 28 | 4 | 38 | yes | TE |
| at_locus.07114 | 4 | 4,897,466 | 4,897,602 | 4  | 0 | 1  | yes | TE |
| at_locus.07115 | 4 | 4,899,356 | 4,899,917 | 8  | 0 | 9  | yes | TE |
| at_locus.07116 | 4 | 4,899,954 | 4,900,310 | 6  | 0 | 0  | no  | TE |
| at_locus.07117 | 4 | 4,900,461 | 4,903,385 | 41 | 5 | 56 | no  | TE |
| at_locus.07118 | 4 | 4,906,025 | 4,906,213 | 4  | 0 | 2  | no  |    |
| at_locus.07119 | 4 | 4,906,485 | 4,906,513 | 17 | 1 | 2  | no  | TE |
| at_locus.07120 | 4 | 4,909,160 | 4,909,531 | 23 | 1 | 5  | no  | TE |

|                |   |           |           |    |   |    |     |    |
|----------------|---|-----------|-----------|----|---|----|-----|----|
| at_locus.07121 | 4 | 4,916,552 | 4,916,721 | 2  | 0 | 4  | yes | TE |
| at_locus.07122 | 4 | 4,917,638 | 4,917,765 | 1  | 0 | 5  | no  | TE |
| at_locus.07123 | 4 | 4,923,892 | 4,923,931 | 19 | 3 | 0  | yes |    |
| at_locus.07124 | 4 | 4,935,038 | 4,935,061 | 5  | 0 | 0  | no  |    |
| at_locus.07125 | 4 | 4,938,069 | 4,938,092 | 5  | 0 | 0  | no  |    |
| at_locus.07126 | 4 | 4,938,843 | 4,939,097 | 6  | 0 | 1  | no  | TE |
| at_locus.07127 | 4 | 4,942,689 | 4,942,915 | 4  | 0 | 3  | no  | TE |
| at_locus.07128 | 4 | 4,948,302 | 4,948,659 | 30 | 0 | 1  | no  |    |
| at_locus.07129 | 4 | 4,948,944 | 4,949,044 | 5  | 0 | 0  | no  | TE |
| at_locus.07130 | 4 | 4,949,265 | 4,949,504 | 1  | 0 | 5  | yes | TE |
| at_locus.07131 | 4 | 4,956,732 | 4,956,917 | 6  | 0 | 0  | no  | TE |
| at_locus.07132 | 4 | 4,957,165 | 4,957,217 | 1  | 0 | 6  | yes | TE |
| at_locus.07133 | 4 | 4,958,219 | 4,958,378 | 0  | 0 | 4  | no  | TE |
| at_locus.07134 | 4 | 4,958,410 | 4,961,240 | 41 | 5 | 52 | no  | TE |
| at_locus.07135 | 4 | 4,961,851 | 4,962,123 | 6  | 0 | 7  | no  | TE |
| at_locus.07136 | 4 | 4,962,821 | 4,963,038 | 5  | 0 | 1  | no  | TE |
| at_locus.07137 | 4 | 4,964,238 | 4,966,310 | 54 | 4 | 57 | yes | TE |
| at_locus.07138 | 4 | 4,966,530 | 4,966,878 | 10 | 0 | 11 | no  | TE |
| at_locus.07139 | 4 | 4,967,310 | 4,969,552 | 27 | 5 | 28 | no  | TE |
| at_locus.07140 | 4 | 4,986,786 | 4,987,536 | 8  | 0 | 6  | no  | TE |
| at_locus.07141 | 4 | 5,003,337 | 5,003,418 | 1  | 0 | 4  | yes | TE |
| at_locus.07142 | 4 | 5,013,887 | 5,014,168 | 10 | 0 | 2  | no  | TE |
| at_locus.07143 | 4 | 5,015,356 | 5,016,681 | 5  | 0 | 19 | yes | TE |
| at_locus.07144 | 4 | 5,016,797 | 5,016,823 | 6  | 0 | 0  | no  | TE |
| at_locus.07145 | 4 | 5,017,609 | 5,017,679 | 4  | 0 | 0  | no  | TE |
| at_locus.07146 | 4 | 5,020,227 | 5,020,482 | 5  | 0 | 0  | no  | TE |
| at_locus.07147 | 4 | 5,020,811 | 5,021,055 | 5  | 0 | 1  | no  | TE |
| at_locus.07148 | 4 | 5,022,215 | 5,022,405 | 0  | 0 | 4  | no  | TE |
| at_locus.07149 | 4 | 5,022,684 | 5,022,800 | 7  | 0 | 2  | no  | TE |
| at_locus.07150 | 4 | 5,023,892 | 5,024,472 | 4  | 0 | 10 | no  | TE |
| at_locus.07151 | 4 | 5,025,090 | 5,025,507 | 5  | 0 | 6  | yes | TE |
| at_locus.07152 | 4 | 5,025,841 | 5,026,128 | 10 | 1 | 22 | yes | TE |
| at_locus.07153 | 4 | 5,026,831 | 5,027,131 | 12 | 0 | 1  | no  | TE |
| at_locus.07154 | 4 | 5,032,794 | 5,032,966 | 4  | 0 | 3  | no  | TE |
| at_locus.07155 | 4 | 5,036,445 | 5,036,667 | 4  | 0 | 3  | yes | TE |
| at_locus.07156 | 4 | 5,044,237 | 5,045,225 | 7  | 0 | 20 | no  | TE |
| at_locus.07157 | 4 | 5,048,808 | 5,049,170 | 5  | 0 | 0  | yes | TE |

|                |   |           |           |    |   |    |     |    |
|----------------|---|-----------|-----------|----|---|----|-----|----|
| at_locus.07158 | 4 | 5,053,934 | 5,054,423 | 4  | 0 | 5  | no  | TE |
| at_locus.07159 | 4 | 5,055,105 | 5,055,456 | 1  | 0 | 2  | yes | TE |
| at_locus.07160 | 4 | 5,057,206 | 5,058,183 | 16 | 0 | 10 | yes | TE |
| at_locus.07161 | 4 | 5,060,128 | 5,060,555 | 5  | 0 | 5  | yes | TE |
| at_locus.07162 | 4 | 5,060,621 | 5,060,900 | 4  | 0 | 0  | yes | TE |
| at_locus.07163 | 4 | 5,062,800 | 5,062,875 | 0  | 0 | 4  | no  | TE |
| at_locus.07164 | 4 | 5,063,242 | 5,063,370 | 5  | 0 | 1  | no  | TE |
| at_locus.07165 | 4 | 5,068,755 | 5,069,022 | 5  | 0 | 1  | no  | TE |
| at_locus.07166 | 4 | 5,071,462 | 5,072,313 | 0  | 0 | 6  | yes | TE |
| at_locus.07167 | 4 | 5,073,933 | 5,074,262 | 4  | 0 | 4  | yes | TE |
| at_locus.07168 | 4 | 5,074,424 | 5,074,765 | 13 | 0 | 3  | no  | TE |
| at_locus.07169 | 4 | 5,083,395 | 5,084,007 | 6  | 0 | 6  | yes | TE |
| at_locus.07170 | 4 | 5,087,212 | 5,087,286 | 13 | 0 | 0  | yes |    |
| at_locus.07171 | 4 | 5,096,847 | 5,096,876 | 11 | 0 | 2  | no  | TE |
| at_locus.07172 | 4 | 5,097,287 | 5,098,055 | 9  | 2 | 6  | no  | TE |
| at_locus.07173 | 4 | 5,100,233 | 5,100,559 | 13 | 0 | 5  | yes | TE |
| at_locus.07174 | 4 | 5,107,114 | 5,107,281 | 0  | 0 | 4  | no  | TE |
| at_locus.07175 | 4 | 5,109,397 | 5,109,846 | 9  | 0 | 7  | yes | TE |
| at_locus.07176 | 4 | 5,111,255 | 5,111,498 | 0  | 0 | 5  | no  | TE |
| at_locus.07177 | 4 | 5,120,895 | 5,121,302 | 10 | 0 | 0  | yes | TE |
| at_locus.07178 | 4 | 5,126,230 | 5,126,375 | 5  | 0 | 2  | yes | TE |
| at_locus.07179 | 4 | 5,127,147 | 5,128,746 | 71 | 4 | 20 | yes | TE |
| at_locus.07180 | 4 | 5,128,967 | 5,131,671 | 50 | 0 | 79 | yes | TE |
| at_locus.07181 | 4 | 5,131,861 | 5,135,003 | 96 | 4 | 77 | yes | TE |
| at_locus.07182 | 4 | 5,176,946 | 5,177,102 | 6  | 0 | 1  | no  | TE |
| at_locus.07183 | 4 | 5,177,262 | 5,177,673 | 7  | 0 | 4  | no  | TE |
| at_locus.07184 | 4 | 5,177,889 | 5,178,118 | 6  | 0 | 3  | no  | TE |
| at_locus.07185 | 4 | 5,179,468 | 5,179,788 | 9  | 0 | 1  | no  | TE |
| at_locus.07186 | 4 | 5,180,082 | 5,180,756 | 8  | 0 | 3  | yes | TE |
| at_locus.07187 | 4 | 5,194,157 | 5,194,385 | 19 | 0 | 1  | yes | TE |
| at_locus.07188 | 4 | 5,203,546 | 5,203,563 | 4  | 0 | 0  | yes |    |
| at_locus.07189 | 4 | 5,204,536 | 5,204,899 | 3  | 0 | 7  | yes | TE |
| at_locus.07190 | 4 | 5,219,724 | 5,220,168 | 20 | 0 | 7  | no  | TE |
| at_locus.07191 | 4 | 5,229,253 | 5,229,383 | 4  | 0 | 0  | no  | TE |
| at_locus.07192 | 4 | 5,235,202 | 5,235,322 | 5  | 0 | 0  | yes | TE |
| at_locus.07193 | 4 | 5,266,639 | 5,266,662 | 0  | 0 | 6  | yes | TE |
| at_locus.07194 | 4 | 5,271,796 | 5,272,759 | 20 | 1 | 6  | yes | TE |



|                |   |           |           |    |   |    |     |    |
|----------------|---|-----------|-----------|----|---|----|-----|----|
| at_locus.07195 | 4 | 5,279,056 | 5,279,110 | 10 | 0 | 0  | no  | TE |
| at_locus.07196 | 4 | 5,279,534 | 5,279,681 | 40 | 0 | 1  | yes | TE |
| at_locus.07197 | 4 | 5,280,298 | 5,280,330 | 4  | 0 | 0  | no  | TE |
| at_locus.07198 | 4 | 5,281,664 | 5,282,142 | 59 | 2 | 91 | yes |    |
| at_locus.07199 | 4 | 5,284,064 | 5,284,478 | 1  | 0 | 4  | yes | TE |
| at_locus.07200 | 4 | 5,284,790 | 5,285,357 | 4  | 0 | 9  | yes |    |
| at_locus.07201 | 4 | 5,285,605 | 5,285,896 | 6  | 0 | 0  | yes |    |
| at_locus.07202 | 4 | 5,293,496 | 5,294,200 | 5  | 0 | 0  | yes | TE |
| at_locus.07203 | 4 | 5,300,966 | 5,301,043 | 18 | 0 | 1  | yes | TE |
| at_locus.07204 | 4 | 5,302,083 | 5,302,944 | 4  | 0 | 3  | yes |    |
| at_locus.07205 | 4 | 5,313,111 | 5,313,162 | 4  | 0 | 0  | yes | TE |
| at_locus.07206 | 4 | 5,314,493 | 5,314,722 | 6  | 0 | 0  | yes |    |
| at_locus.07207 | 4 | 5,321,253 | 5,321,277 | 4  | 0 | 0  | no  | TE |
| at_locus.07208 | 4 | 5,324,024 | 5,325,126 | 4  | 0 | 4  | yes |    |
| at_locus.07209 | 4 | 5,326,274 | 5,327,202 | 50 | 0 | 10 | yes | TE |
| at_locus.07210 | 4 | 5,327,829 | 5,328,346 | 11 | 1 | 5  | no  | TE |
| at_locus.07211 | 4 | 5,328,566 | 5,330,307 | 61 | 0 | 21 | yes | TE |
| at_locus.07212 | 4 | 5,330,597 | 5,331,563 | 38 | 1 | 12 | no  | TE |
| at_locus.07213 | 4 | 5,339,751 | 5,340,299 | 4  | 0 | 2  | yes |    |
| at_locus.07214 | 4 | 5,340,501 | 5,340,940 | 4  | 0 | 2  | no  |    |
| at_locus.07215 | 4 | 5,353,956 | 5,354,841 | 21 | 0 | 0  | no  | TE |
| at_locus.07216 | 4 | 5,355,175 | 5,355,595 | 7  | 0 | 0  | yes | TE |
| at_locus.07217 | 4 | 5,382,021 | 5,382,524 | 5  | 0 | 2  | no  | TE |
| at_locus.07218 | 4 | 5,383,055 | 5,383,332 | 17 | 0 | 3  | yes | TE |
| at_locus.07219 | 4 | 5,391,814 | 5,391,942 | 5  | 0 | 0  | no  | TE |
| at_locus.07220 | 4 | 5,393,909 | 5,394,286 | 11 | 0 | 3  | no  | TE |
| at_locus.07221 | 4 | 5,394,550 | 5,394,595 | 8  | 0 | 0  | yes |    |
| at_locus.07222 | 4 | 5,396,891 | 5,397,322 | 8  | 0 | 3  | yes | TE |
| at_locus.07223 | 4 | 5,397,634 | 5,398,548 | 10 | 0 | 13 | yes | TE |
| at_locus.07224 | 4 | 5,400,562 | 5,400,833 | 7  | 0 | 1  | no  | TE |
| at_locus.07225 | 4 | 5,401,102 | 5,401,596 | 8  | 0 | 3  | yes | TE |
| at_locus.07226 | 4 | 5,402,009 | 5,402,135 | 5  | 0 | 1  | no  | TE |
| at_locus.07227 | 4 | 5,402,683 | 5,403,120 | 6  | 0 | 1  | yes | TE |
| at_locus.07228 | 4 | 5,407,811 | 5,408,195 | 17 | 0 | 9  | yes |    |
| at_locus.07229 | 4 | 5,415,464 | 5,415,625 | 5  | 0 | 2  | yes |    |
| at_locus.07230 | 4 | 5,415,825 | 5,416,269 | 15 | 0 | 14 | yes |    |
| at_locus.07231 | 4 | 5,422,391 | 5,422,600 | 4  | 0 | 0  | yes | TE |

|                |   |           |           |     |   |     |     |    |
|----------------|---|-----------|-----------|-----|---|-----|-----|----|
| at_locus.07232 | 4 | 5,422,605 | 5,423,377 | 9   | 2 | 12  | yes | TE |
| at_locus.07233 | 4 | 5,438,739 | 5,439,348 | 414 | 6 | 335 | yes |    |
| at_locus.07234 | 4 | 5,439,715 | 5,440,439 | 35  | 1 | 1   | yes | TE |
| at_locus.07235 | 4 | 5,450,633 | 5,450,764 | 6   | 0 | 0   | yes |    |
| at_locus.07236 | 4 | 5,456,440 | 5,456,666 | 17  | 2 | 0   | no  |    |
| at_locus.07237 | 4 | 5,469,796 | 5,469,830 | 0   | 0 | 4   | yes |    |
| at_locus.07238 | 4 | 5,471,387 | 5,472,247 | 29  | 0 | 9   | yes | TE |
| at_locus.07239 | 4 | 5,473,868 | 5,475,154 | 44  | 0 | 33  | yes |    |
| at_locus.07240 | 4 | 5,478,471 | 5,479,105 | 23  | 0 | 0   | yes | TE |
| at_locus.07241 | 4 | 5,485,997 | 5,486,739 | 14  | 3 | 5   | no  | TE |
| at_locus.07242 | 4 | 5,487,042 | 5,487,221 | 4   | 1 | 11  | no  | TE |
| at_locus.07243 | 4 | 5,487,772 | 5,488,121 | 0   | 0 | 5   | yes | TE |
| at_locus.07244 | 4 | 5,488,790 | 5,490,671 | 8   | 0 | 41  | yes | TE |
| at_locus.07245 | 4 | 5,491,314 | 5,492,096 | 3   | 0 | 19  | yes | TE |
| at_locus.07246 | 4 | 5,492,720 | 5,493,139 | 1   | 0 | 6   | no  | TE |
| at_locus.07247 | 4 | 5,493,414 | 5,493,554 | 0   | 0 | 5   | no  | TE |
| at_locus.07248 | 4 | 5,505,839 | 5,506,025 | 8   | 0 | 1   | yes |    |
| at_locus.07249 | 4 | 5,517,835 | 5,518,697 | 21  | 2 | 3   | no  | TE |
| at_locus.07250 | 4 | 5,523,713 | 5,524,198 | 0   | 0 | 5   | yes | TE |
| at_locus.07251 | 4 | 5,530,838 | 5,531,004 | 4   | 0 | 0   | yes | TE |
| at_locus.07252 | 4 | 5,535,505 | 5,535,732 | 2   | 0 | 4   | yes | TE |
| at_locus.07253 | 4 | 5,536,147 | 5,536,189 | 4   | 0 | 1   | no  | TE |
| at_locus.07254 | 4 | 5,539,443 | 5,540,062 | 22  | 1 | 0   | no  | TE |
| at_locus.07255 | 4 | 5,540,351 | 5,540,621 | 11  | 0 | 0   | no  | TE |
| at_locus.07256 | 4 | 5,541,344 | 5,541,386 | 9   | 0 | 0   | no  | TE |
| at_locus.07257 | 4 | 5,541,953 | 5,542,747 | 6   | 0 | 8   | yes | TE |
| at_locus.07258 | 4 | 5,543,611 | 5,543,672 | 0   | 0 | 4   | yes | TE |
| at_locus.07259 | 4 | 5,544,206 | 5,544,241 | 4   | 0 | 0   | yes | TE |
| at_locus.07260 | 4 | 5,544,540 | 5,544,778 | 6   | 0 | 5   | no  | TE |
| at_locus.07261 | 4 | 5,545,091 | 5,545,463 | 1   | 0 | 4   | no  | TE |
| at_locus.07262 | 4 | 5,556,034 | 5,556,518 | 5   | 0 | 2   | yes |    |
| at_locus.07263 | 4 | 5,557,150 | 5,557,412 | 7   | 0 | 1   | yes | TE |
| at_locus.07264 | 4 | 5,557,642 | 5,557,864 | 14  | 0 | 0   | yes |    |
| at_locus.07265 | 4 | 5,558,127 | 5,558,579 | 7   | 0 | 2   | yes | TE |
| at_locus.07266 | 4 | 5,558,762 | 5,561,248 | 111 | 4 | 91  | yes | TE |
| at_locus.07267 | 4 | 5,569,600 | 5,569,724 | 1   | 0 | 4   | yes | TE |
| at_locus.07268 | 4 | 5,570,855 | 5,571,092 | 2   | 0 | 3   | yes |    |

|                |   |           |           |    |   |    |     |    |
|----------------|---|-----------|-----------|----|---|----|-----|----|
| at_locus.07269 | 4 | 5,571,391 | 5,571,536 | 2  | 0 | 6  | no  | TE |
| at_locus.07270 | 4 | 5,571,857 | 5,572,081 | 6  | 0 | 0  | yes | TE |
| at_locus.07271 | 4 | 5,572,471 | 5,572,594 | 5  | 0 | 0  | yes | TE |
| at_locus.07272 | 4 | 5,581,722 | 5,582,005 | 1  | 0 | 6  | no  | TE |
| at_locus.07273 | 4 | 5,582,124 | 5,583,157 | 17 | 1 | 10 | no  | TE |
| at_locus.07274 | 4 | 5,583,531 | 5,583,593 | 1  | 0 | 4  | no  | TE |
| at_locus.07275 | 4 | 5,584,697 | 5,584,980 | 2  | 0 | 6  | no  | TE |
| at_locus.07276 | 4 | 5,585,099 | 5,586,132 | 17 | 1 | 10 | no  | TE |
| at_locus.07277 | 4 | 5,604,462 | 5,604,623 | 4  | 0 | 0  | yes | TE |
| at_locus.07278 | 4 | 5,612,023 | 5,612,172 | 4  | 1 | 3  | no  | TE |
| at_locus.07279 | 4 | 5,612,408 | 5,612,832 | 10 | 0 | 4  | no  | TE |
| at_locus.07280 | 4 | 5,613,038 | 5,613,582 | 4  | 0 | 6  | no  | TE |
| at_locus.07281 | 4 | 5,627,176 | 5,627,200 | 4  | 0 | 0  | no  | TE |
| at_locus.07282 | 4 | 5,629,957 | 5,630,358 | 14 | 0 | 0  | yes | TE |
| at_locus.07283 | 4 | 5,642,481 | 5,642,550 | 6  | 0 | 0  | yes |    |
| at_locus.07284 | 4 | 5,642,793 | 5,643,027 | 9  | 0 | 2  | yes |    |
| at_locus.07285 | 4 | 5,643,253 | 5,643,386 | 4  | 0 | 0  | no  | TE |
| at_locus.07286 | 4 | 5,644,802 | 5,645,002 | 6  | 0 | 1  | no  | TE |
| at_locus.07287 | 4 | 5,663,494 | 5,663,690 | 6  | 0 | 1  | yes | TE |
| at_locus.07288 | 4 | 5,669,973 | 5,670,007 | 4  | 1 | 0  | yes | TE |
| at_locus.07289 | 4 | 5,671,254 | 5,671,698 | 14 | 0 | 7  | no  | TE |
| at_locus.07290 | 4 | 5,672,118 | 5,672,182 | 6  | 0 | 0  | yes | TE |
| at_locus.07291 | 4 | 5,679,235 | 5,679,390 | 24 | 0 | 0  | yes | TE |
| at_locus.07292 | 4 | 5,679,851 | 5,679,999 | 51 | 0 | 2  | yes | TE |
| at_locus.07293 | 4 | 5,681,771 | 5,682,672 | 24 | 2 | 1  | no  | TE |
| at_locus.07294 | 4 | 5,684,203 | 5,684,532 | 12 | 0 | 10 | no  | TE |
| at_locus.07295 | 4 | 5,684,954 | 5,685,635 | 10 | 0 | 6  | no  | TE |
| at_locus.07296 | 4 | 5,687,869 | 5,688,056 | 1  | 0 | 6  | no  | TE |
| at_locus.07297 | 4 | 5,688,820 | 5,689,223 | 2  | 0 | 9  | no  | TE |
| at_locus.07298 | 4 | 5,690,083 | 5,690,473 | 1  | 0 | 4  | no  | TE |
| at_locus.07299 | 4 | 5,690,679 | 5,690,911 | 1  | 0 | 4  | no  | TE |
| at_locus.07300 | 4 | 5,692,184 | 5,692,809 | 8  | 0 | 11 | no  | TE |
| at_locus.07301 | 4 | 5,693,078 | 5,693,277 | 2  | 0 | 5  | no  | TE |
| at_locus.07302 | 4 | 5,693,450 | 5,694,205 | 10 | 0 | 7  | no  | TE |
| at_locus.07303 | 4 | 5,694,458 | 5,694,893 | 1  | 0 | 9  | yes | TE |
| at_locus.07304 | 4 | 5,695,122 | 5,695,917 | 4  | 0 | 10 | no  | TE |
| at_locus.07305 | 4 | 5,696,316 | 5,696,555 | 2  | 0 | 4  | no  | TE |

|                |   |           |           |    |   |    |     |    |
|----------------|---|-----------|-----------|----|---|----|-----|----|
| at_locus.07306 | 4 | 5,696,836 | 5,697,288 | 3  | 0 | 13 | yes | TE |
| at_locus.07307 | 4 | 5,697,443 | 5,697,828 | 9  | 0 | 0  | yes | TE |
| at_locus.07308 | 4 | 5,707,146 | 5,707,200 | 5  | 0 | 0  | yes |    |
| at_locus.07309 | 4 | 5,719,695 | 5,719,847 | 7  | 1 | 0  | yes | TE |
| at_locus.07310 | 4 | 5,743,661 | 5,743,832 | 33 | 2 | 2  | yes | TE |
| at_locus.07311 | 4 | 5,744,615 | 5,744,793 | 8  | 0 | 0  | yes | TE |
| at_locus.07312 | 4 | 5,764,832 | 5,765,182 | 4  | 1 | 0  | yes |    |
| at_locus.07313 | 4 | 5,772,164 | 5,772,223 | 5  | 0 | 0  | yes | TE |
| at_locus.07314 | 4 | 5,773,795 | 5,774,060 | 14 | 0 | 18 | yes |    |
| at_locus.07315 | 4 | 5,790,916 | 5,791,840 | 26 | 0 | 2  | yes | TE |
| at_locus.07316 | 4 | 5,808,618 | 5,808,909 | 66 | 3 | 1  | yes |    |
| at_locus.07317 | 4 | 5,823,613 | 5,823,926 | 0  | 0 | 5  | no  | TE |
| at_locus.07318 | 4 | 5,824,913 | 5,825,192 | 2  | 0 | 4  | no  | TE |
| at_locus.07319 | 4 | 5,827,130 | 5,827,215 | 4  | 0 | 1  | yes | TE |
| at_locus.07320 | 4 | 5,836,504 | 5,837,249 | 46 | 0 | 1  | yes | TE |
| at_locus.07321 | 4 | 5,844,612 | 5,844,677 | 5  | 0 | 0  | yes |    |
| at_locus.07322 | 4 | 5,845,124 | 5,845,474 | 3  | 0 | 3  | no  | TE |
| at_locus.07323 | 4 | 5,845,814 | 5,846,183 | 7  | 0 | 2  | no  | TE |
| at_locus.07324 | 4 | 5,858,062 | 5,858,154 | 16 | 0 | 3  | no  | TE |
| at_locus.07325 | 4 | 5,858,950 | 5,859,069 | 12 | 0 | 0  | no  |    |
| at_locus.07326 | 4 | 5,865,282 | 5,865,621 | 7  | 0 | 0  | no  |    |
| at_locus.07327 | 4 | 5,865,858 | 5,867,091 | 11 | 0 | 10 | no  | TE |
| at_locus.07328 | 4 | 5,867,788 | 5,868,291 | 5  | 0 | 8  | no  |    |
| at_locus.07329 | 4 | 5,868,639 | 5,869,100 | 15 | 0 | 29 | no  |    |
| at_locus.07330 | 4 | 5,871,616 | 5,871,792 | 4  | 0 | 0  | no  |    |
| at_locus.07331 | 4 | 5,875,359 | 5,875,451 | 16 | 0 | 3  | no  | TE |
| at_locus.07332 | 4 | 5,876,247 | 5,876,376 | 12 | 0 | 0  | no  |    |
| at_locus.07333 | 4 | 5,882,589 | 5,882,928 | 7  | 0 | 0  | no  |    |
| at_locus.07334 | 4 | 5,883,165 | 5,884,395 | 11 | 0 | 10 | no  | TE |
| at_locus.07335 | 4 | 5,885,092 | 5,885,595 | 5  | 0 | 8  | no  |    |
| at_locus.07336 | 4 | 5,885,943 | 5,886,404 | 16 | 0 | 30 | yes |    |
| at_locus.07337 | 4 | 5,888,919 | 5,889,095 | 4  | 0 | 0  | no  |    |
| at_locus.07338 | 4 | 5,892,727 | 5,892,754 | 15 | 0 | 3  | no  | TE |
| at_locus.07339 | 4 | 5,901,631 | 5,901,723 | 16 | 0 | 3  | no  | TE |
| at_locus.07340 | 4 | 5,902,519 | 5,902,638 | 12 | 0 | 0  | no  |    |
| at_locus.07341 | 4 | 5,908,881 | 5,909,212 | 6  | 0 | 0  | no  |    |
| at_locus.07342 | 4 | 5,909,962 | 5,910,621 | 5  | 0 | 7  | no  | TE |

|                |   |           |           |    |   |    |     |    |
|----------------|---|-----------|-----------|----|---|----|-----|----|
| at_locus.07343 | 4 | 5,911,482 | 5,911,765 | 2  | 1 | 7  | no  |    |
| at_locus.07344 | 4 | 5,912,050 | 5,912,547 | 11 | 2 | 26 | yes |    |
| at_locus.07345 | 4 | 5,917,352 | 5,917,871 | 6  | 0 | 3  | yes | TE |
| at_locus.07346 | 4 | 5,919,188 | 5,919,422 | 4  | 0 | 0  | yes |    |
| at_locus.07347 | 4 | 5,920,537 | 5,921,190 | 7  | 1 | 8  | yes |    |
| at_locus.07348 | 4 | 5,921,413 | 5,922,140 | 10 | 0 | 19 | yes | TE |
| at_locus.07349 | 4 | 5,922,626 | 5,922,696 | 6  | 0 | 0  | yes |    |
| at_locus.07350 | 4 | 5,930,948 | 5,931,002 | 1  | 0 | 4  | yes | TE |
| at_locus.07351 | 4 | 5,933,861 | 5,935,012 | 30 | 1 | 30 | yes | TE |
| at_locus.07352 | 4 | 5,935,179 | 5,935,497 | 7  | 0 | 0  | no  | TE |
| at_locus.07353 | 4 | 5,935,897 | 5,936,234 | 7  | 0 | 3  | yes | TE |
| at_locus.07354 | 4 | 5,936,324 | 5,936,547 | 2  | 0 | 4  | no  | TE |
| at_locus.07355 | 4 | 5,943,774 | 5,943,973 | 0  | 0 | 4  | no  | TE |
| at_locus.07356 | 4 | 5,944,350 | 5,944,860 | 3  | 1 | 8  | no  | TE |
| at_locus.07357 | 4 | 5,945,507 | 5,945,743 | 6  | 0 | 1  | no  | TE |
| at_locus.07358 | 4 | 5,947,021 | 5,947,598 | 4  | 0 | 9  | no  | TE |
| at_locus.07359 | 4 | 5,947,764 | 5,948,508 | 11 | 0 | 6  | no  | TE |
| at_locus.07360 | 4 | 5,948,741 | 5,949,764 | 4  | 0 | 9  | no  | TE |
| at_locus.07361 | 4 | 5,950,181 | 5,950,644 | 2  | 0 | 5  | no  | TE |
| at_locus.07362 | 4 | 5,951,259 | 5,951,629 | 15 | 0 | 8  | no  | TE |
| at_locus.07363 | 4 | 5,952,095 | 5,952,339 | 1  | 0 | 4  | yes | TE |
| at_locus.07364 | 4 | 5,964,489 | 5,964,831 | 10 | 0 | 1  | yes | TE |
| at_locus.07365 | 4 | 5,976,860 | 5,977,207 | 6  | 0 | 0  | yes | TE |
| at_locus.07366 | 4 | 5,984,052 | 5,984,143 | 9  | 0 | 0  | yes | TE |
| at_locus.07367 | 4 | 5,987,044 | 5,987,207 | 6  | 0 | 0  | no  | TE |
| at_locus.07368 | 4 | 5,991,117 | 5,991,332 | 0  | 0 | 5  | no  | TE |
| at_locus.07369 | 4 | 5,991,637 | 5,991,873 | 7  | 0 | 0  | no  | TE |
| at_locus.07370 | 4 | 6,006,946 | 6,006,975 | 5  | 0 | 0  | no  |    |
| at_locus.07371 | 4 | 6,014,816 | 6,014,845 | 5  | 0 | 0  | no  |    |
| at_locus.07372 | 4 | 6,019,909 | 6,020,439 | 5  | 0 | 11 | yes | TE |
| at_locus.07373 | 4 | 6,032,081 | 6,032,452 | 75 | 5 | 58 | yes |    |
| at_locus.07374 | 4 | 6,033,505 | 6,033,711 | 9  | 1 | 2  | yes | TE |
| at_locus.07375 | 4 | 6,034,192 | 6,034,403 | 24 | 1 | 6  | yes | TE |
| at_locus.07376 | 4 | 6,046,530 | 6,047,483 | 24 | 0 | 20 | yes | TE |
| at_locus.07377 | 4 | 6,054,706 | 6,054,849 | 12 | 0 | 0  | no  |    |
| at_locus.07378 | 4 | 6,055,194 | 6,055,224 | 4  | 0 | 1  | no  |    |
| at_locus.07379 | 4 | 6,056,288 | 6,056,347 | 5  | 0 | 0  | no  | TE |

|                |   |           |           |    |   |    |     |    |
|----------------|---|-----------|-----------|----|---|----|-----|----|
| at_locus.07380 | 4 | 6,057,028 | 6,057,324 | 9  | 0 | 5  | yes |    |
| at_locus.07381 | 4 | 6,067,456 | 6,067,915 | 9  | 0 | 5  | yes | TE |
| at_locus.07382 | 4 | 6,070,699 | 6,071,175 | 4  | 0 | 1  | no  | TE |
| at_locus.07383 | 4 | 6,072,195 | 6,072,617 | 9  | 0 | 2  | yes | TE |
| at_locus.07384 | 4 | 6,079,836 | 6,080,377 | 0  | 0 | 8  | yes | TE |
| at_locus.07385 | 4 | 6,081,339 | 6,081,859 | 1  | 0 | 7  | no  | TE |
| at_locus.07386 | 4 | 6,091,232 | 6,091,464 | 5  | 1 | 2  | yes |    |
| at_locus.07387 | 4 | 6,099,069 | 6,099,104 | 21 | 0 | 0  | yes | TE |
| at_locus.07388 | 4 | 6,103,644 | 6,103,678 | 4  | 0 | 0  | yes |    |
| at_locus.07389 | 4 | 6,110,544 | 6,111,125 | 10 | 0 | 1  | no  | TE |
| at_locus.07390 | 4 | 6,113,384 | 6,113,547 | 5  | 0 | 1  | yes |    |
| at_locus.07391 | 4 | 6,114,898 | 6,115,139 | 5  | 0 | 0  | yes | TE |
| at_locus.07392 | 4 | 6,115,383 | 6,115,865 | 47 | 1 | 2  | no  | TE |
| at_locus.07393 | 4 | 6,132,374 | 6,132,761 | 10 | 1 | 5  | yes | TE |
| at_locus.07394 | 4 | 6,140,448 | 6,140,759 | 21 | 0 | 1  | no  | TE |
| at_locus.07395 | 4 | 6,165,285 | 6,165,461 | 21 | 1 | 0  | yes | TE |
| at_locus.07396 | 4 | 6,165,839 | 6,165,912 | 29 | 2 | 1  | no  | TE |
| at_locus.07397 | 4 | 6,166,209 | 6,166,449 | 10 | 0 | 0  | no  | TE |
| at_locus.07398 | 4 | 6,169,197 | 6,169,224 | 4  | 0 | 0  | no  | TE |
| at_locus.07399 | 4 | 6,172,648 | 6,173,206 | 14 | 0 | 1  | yes | TE |
| at_locus.07400 | 4 | 6,178,445 | 6,178,807 | 15 | 0 | 0  | yes | TE |
| at_locus.07401 | 4 | 6,179,061 | 6,179,448 | 22 | 0 | 1  | yes | TE |
| at_locus.07402 | 4 | 6,184,115 | 6,184,165 | 8  | 2 | 0  | no  |    |
| at_locus.07403 | 4 | 6,184,408 | 6,184,568 | 5  | 0 | 0  | no  |    |
| at_locus.07404 | 4 | 6,198,003 | 6,198,386 | 12 | 0 | 8  | yes | TE |
| at_locus.07405 | 4 | 6,203,781 | 6,204,005 | 14 | 0 | 0  | yes |    |
| at_locus.07406 | 4 | 6,205,757 | 6,206,091 | 4  | 0 | 5  | yes |    |
| at_locus.07407 | 4 | 6,213,212 | 6,213,506 | 6  | 0 | 2  | yes |    |
| at_locus.07408 | 4 | 6,227,570 | 6,227,835 | 3  | 0 | 6  | yes |    |
| at_locus.07409 | 4 | 6,252,421 | 6,252,516 | 4  | 0 | 0  | yes | TE |
| at_locus.07410 | 4 | 6,275,457 | 6,275,499 | 4  | 0 | 0  | yes |    |
| at_locus.07411 | 4 | 6,275,811 | 6,276,098 | 29 | 0 | 22 | yes |    |
| at_locus.07412 | 4 | 6,279,019 | 6,279,227 | 5  | 0 | 0  | no  | TE |
| at_locus.07413 | 4 | 6,280,006 | 6,280,352 | 16 | 0 | 0  | no  | TE |
| at_locus.07414 | 4 | 6,281,047 | 6,281,267 | 14 | 0 | 0  | no  | TE |
| at_locus.07415 | 4 | 6,332,665 | 6,332,770 | 5  | 0 | 0  | yes | TE |
| at_locus.07416 | 4 | 6,339,154 | 6,339,236 | 15 | 0 | 2  | yes | TE |

|                |   |           |           |    |   |    |     |    |
|----------------|---|-----------|-----------|----|---|----|-----|----|
| at_locus.07417 | 4 | 6,339,961 | 6,340,074 | 4  | 0 | 0  | no  | TE |
| at_locus.07418 | 4 | 6,343,923 | 6,344,072 | 5  | 0 | 0  | yes | TE |
| at_locus.07419 | 4 | 6,351,513 | 6,351,549 | 4  | 0 | 0  | yes |    |
| at_locus.07420 | 4 | 6,357,218 | 6,357,657 | 10 | 0 | 5  | yes |    |
| at_locus.07421 | 4 | 6,359,753 | 6,359,812 | 5  | 0 | 0  | yes | TE |
| at_locus.07422 | 4 | 6,362,543 | 6,362,587 | 6  | 0 | 0  | no  |    |
| at_locus.07423 | 4 | 6,366,159 | 6,366,673 | 0  | 0 | 5  | no  |    |
| at_locus.07424 | 4 | 6,374,066 | 6,374,102 | 4  | 0 | 0  | yes | TE |
| at_locus.07425 | 4 | 6,376,658 | 6,377,013 | 7  | 0 | 3  | no  | TE |
| at_locus.07426 | 4 | 6,378,122 | 6,378,511 | 4  | 1 | 4  | no  | TE |
| at_locus.07427 | 4 | 6,378,865 | 6,379,006 | 4  | 0 | 0  | no  | TE |
| at_locus.07428 | 4 | 6,387,069 | 6,387,247 | 4  | 0 | 2  | yes |    |
| at_locus.07429 | 4 | 6,387,496 | 6,387,692 | 7  | 0 | 2  | yes |    |
| at_locus.07430 | 4 | 6,389,303 | 6,389,378 | 9  | 0 | 2  | no  |    |
| at_locus.07431 | 4 | 6,405,191 | 6,405,320 | 7  | 0 | 1  | yes |    |
| at_locus.07432 | 4 | 6,414,058 | 6,414,648 | 8  | 0 | 1  | yes | TE |
| at_locus.07433 | 4 | 6,426,615 | 6,427,210 | 23 | 0 | 0  | no  | TE |
| at_locus.07434 | 4 | 6,429,802 | 6,429,897 | 30 | 1 | 1  | no  | TE |
| at_locus.07435 | 4 | 6,469,851 | 6,470,001 | 4  | 0 | 1  | yes | TE |
| at_locus.07436 | 4 | 6,479,551 | 6,479,743 | 15 | 0 | 0  | yes | TE |
| at_locus.07437 | 4 | 6,487,572 | 6,487,681 | 5  | 0 | 0  | yes |    |
| at_locus.07438 | 4 | 6,504,408 | 6,504,630 | 4  | 0 | 0  | yes | TE |
| at_locus.07439 | 4 | 6,505,625 | 6,505,884 | 13 | 0 | 1  | yes | TE |
| at_locus.07440 | 4 | 6,529,465 | 6,530,960 | 59 | 2 | 18 | yes | TE |
| at_locus.07441 | 4 | 6,531,181 | 6,533,685 | 50 | 0 | 65 | yes | TE |
| at_locus.07442 | 4 | 6,533,828 | 6,533,949 | 0  | 0 | 7  | no  | TE |
| at_locus.07443 | 4 | 6,533,982 | 6,536,829 | 97 | 4 | 89 | yes | TE |
| at_locus.07444 | 4 | 6,537,792 | 6,537,820 | 4  | 0 | 0  | no  | TE |
| at_locus.07445 | 4 | 6,549,010 | 6,549,330 | 8  | 1 | 1  | yes |    |
| at_locus.07446 | 4 | 6,549,582 | 6,549,654 | 5  | 0 | 0  | yes |    |
| at_locus.07447 | 4 | 6,551,610 | 6,551,854 | 8  | 0 | 10 | yes |    |
| at_locus.07448 | 4 | 6,554,825 | 6,554,952 | 6  | 0 | 0  | yes |    |
| at_locus.07449 | 4 | 6,560,383 | 6,561,407 | 15 | 0 | 6  | yes | TE |
| at_locus.07450 | 4 | 6,562,663 | 6,563,094 | 15 | 0 | 3  | yes | TE |
| at_locus.07451 | 4 | 6,579,255 | 6,579,291 | 5  | 0 | 0  | yes |    |
| at_locus.07452 | 4 | 6,581,485 | 6,581,521 | 27 | 0 | 0  | no  | TE |
| at_locus.07453 | 4 | 6,582,508 | 6,582,784 | 4  | 0 | 6  | no  |    |

|                |   |           |           |    |    |    |     |    |
|----------------|---|-----------|-----------|----|----|----|-----|----|
| at_locus.07454 | 4 | 6,598,278 | 6,598,782 | 6  | 0  | 10 | yes |    |
| at_locus.07455 | 4 | 6,624,619 | 6,624,919 | 4  | 0  | 0  | no  | TE |
| at_locus.07456 | 4 | 6,625,877 | 6,625,905 | 11 | 0  | 0  | no  | TE |
| at_locus.07457 | 4 | 6,633,283 | 6,633,343 | 4  | 0  | 0  | no  |    |
| at_locus.07458 | 4 | 6,647,359 | 6,647,422 | 29 | 0  | 0  | yes |    |
| at_locus.07459 | 4 | 6,661,334 | 6,661,489 | 12 | 0  | 0  | yes | TE |
| at_locus.07460 | 4 | 6,664,612 | 6,664,980 | 0  | 5  | 0  | yes |    |
| at_locus.07461 | 4 | 6,668,549 | 6,669,200 | 0  | 22 | 5  | yes |    |
| at_locus.07462 | 4 | 6,686,437 | 6,686,724 | 8  | 0  | 3  | yes |    |
| at_locus.07463 | 4 | 6,699,191 | 6,701,341 | 37 | 1  | 4  | yes | TE |
| at_locus.07464 | 4 | 6,705,789 | 6,705,824 | 2  | 0  | 0  | no  |    |
| at_locus.07465 | 4 | 6,718,932 | 6,719,081 | 37 | 0  | 0  | yes | TE |
| at_locus.07466 | 4 | 6,723,490 | 6,723,581 | 4  | 0  | 1  | yes | TE |
| at_locus.07467 | 4 | 6,728,735 | 6,729,119 | 0  | 0  | 7  | yes | TE |
| at_locus.07468 | 4 | 6,729,339 | 6,729,533 | 7  | 0  | 1  | no  |    |
| at_locus.07469 | 4 | 6,729,622 | 6,729,975 | 25 | 0  | 17 | yes |    |
| at_locus.07470 | 4 | 6,757,668 | 6,758,014 | 8  | 0  | 1  | no  | TE |
| at_locus.07471 | 4 | 6,793,897 | 6,794,067 | 14 | 0  | 0  | yes |    |
| at_locus.07472 | 4 | 6,846,109 | 6,846,459 | 27 | 0  | 2  | yes | TE |
| at_locus.07473 | 4 | 6,879,656 | 6,879,787 | 5  | 1  | 0  | yes |    |
| at_locus.07474 | 4 | 6,890,473 | 6,890,539 | 4  | 0  | 0  | yes | TE |
| at_locus.07475 | 4 | 6,895,464 | 6,895,538 | 9  | 0  | 0  | no  | TE |
| at_locus.07477 | 4 | 6,908,381 | 6,908,759 | 18 | 0  | 1  | yes | TE |
| at_locus.07478 | 4 | 6,908,977 | 6,909,125 | 20 | 0  | 1  | no  | TE |
| at_locus.07479 | 4 | 6,912,317 | 6,912,397 | 8  | 0  | 1  | no  | TE |
| at_locus.07480 | 4 | 6,918,449 | 6,918,683 | 6  | 0  | 0  | yes | TE |
| at_locus.07481 | 4 | 6,934,389 | 6,935,178 | 54 | 0  | 35 | yes |    |
| at_locus.07482 | 4 | 6,943,786 | 6,944,199 | 11 | 0  | 0  | no  |    |
| at_locus.07483 | 4 | 6,944,433 | 6,944,532 | 10 | 0  | 0  | yes | TE |
| at_locus.07484 | 4 | 6,953,507 | 6,953,871 | 12 | 0  | 0  | yes |    |
| at_locus.07485 | 4 | 6,954,190 | 6,954,602 | 15 | 0  | 1  | yes |    |
| at_locus.07486 | 4 | 7,030,119 | 7,030,324 | 4  | 0  | 0  | no  | TE |
| at_locus.07487 | 4 | 7,031,143 | 7,032,258 | 9  | 0  | 10 | yes | TE |
| at_locus.07488 | 4 | 7,032,372 | 7,032,548 | 7  | 0  | 2  | no  | TE |
| at_locus.07489 | 4 | 7,033,499 | 7,033,617 | 4  | 0  | 0  | yes | TE |
| at_locus.07490 | 4 | 7,034,247 | 7,034,271 | 4  | 0  | 0  | no  | TE |
| at_locus.07491 | 4 | 7,034,610 | 7,034,748 | 5  | 0  | 0  | yes | TE |



|                |   |           |           |    |   |    |     |    |
|----------------|---|-----------|-----------|----|---|----|-----|----|
| at_locus.07492 | 4 | 7,040,891 | 7,040,982 | 10 | 0 | 0  | yes | TE |
| at_locus.07493 | 4 | 7,041,404 | 7,041,625 | 4  | 0 | 0  | yes |    |
| at_locus.07494 | 4 | 7,058,874 | 7,059,099 | 17 | 0 | 0  | no  | TE |
| at_locus.07495 | 4 | 7,059,451 | 7,059,985 | 20 | 2 | 2  | no  | TE |
| at_locus.07496 | 4 | 7,060,463 | 7,060,692 | 4  | 0 | 0  | no  | TE |
| at_locus.07497 | 4 | 7,061,764 | 7,062,053 | 2  | 0 | 4  | no  | TE |
| at_locus.07498 | 4 | 7,084,155 | 7,084,207 | 8  | 0 | 0  | no  | TE |
| at_locus.07499 | 4 | 7,084,521 | 7,084,626 | 5  | 0 | 2  | no  | TE |
| at_locus.07500 | 4 | 7,100,076 | 7,100,575 | 5  | 0 | 1  | yes |    |
| at_locus.07501 | 4 | 7,102,438 | 7,102,624 | 12 | 0 | 0  | yes | TE |
| at_locus.07502 | 4 | 7,150,021 | 7,150,162 | 6  | 0 | 0  | yes | TE |
| at_locus.07503 | 4 | 7,154,775 | 7,155,271 | 33 | 0 | 1  | no  | TE |
| at_locus.07504 | 4 | 7,178,610 | 7,179,237 | 16 | 0 | 14 | yes | TE |
| at_locus.07505 | 4 | 7,231,384 | 7,231,491 | 10 | 0 | 0  | no  | TE |
| at_locus.07507 | 4 | 7,235,167 | 7,235,245 | 6  | 0 | 1  | no  | TE |
| at_locus.07508 | 4 | 7,235,812 | 7,236,130 | 3  | 0 | 2  | no  | TE |
| at_locus.07509 | 4 | 7,249,669 | 7,249,807 | 7  | 0 | 0  | yes |    |
| at_locus.07510 | 4 | 7,250,579 | 7,251,295 | 24 | 0 | 15 | yes | TE |
| at_locus.07511 | 4 | 7,267,426 | 7,267,576 | 8  | 0 | 0  | yes |    |
| at_locus.07512 | 4 | 7,300,479 | 7,300,649 | 6  | 1 | 0  | yes | TE |
| at_locus.07513 | 4 | 7,318,569 | 7,318,691 | 4  | 0 | 0  | yes |    |
| at_locus.07514 | 4 | 7,346,031 | 7,346,106 | 7  | 0 | 0  | yes |    |
| at_locus.07515 | 4 | 7,358,703 | 7,358,846 | 6  | 0 | 0  | yes |    |
| at_locus.07516 | 4 | 7,359,242 | 7,360,277 | 81 | 1 | 10 | yes | TE |
| at_locus.07517 | 4 | 7,360,994 | 7,361,318 | 11 | 1 | 4  | no  | TE |
| at_locus.07518 | 4 | 7,361,575 | 7,363,310 | 62 | 0 | 16 | no  | TE |
| at_locus.07519 | 4 | 7,363,693 | 7,364,587 | 55 | 1 | 16 | yes | TE |
| at_locus.07520 | 4 | 7,383,414 | 7,383,534 | 6  | 0 | 0  | no  | TE |
| at_locus.07521 | 4 | 7,384,250 | 7,384,277 | 4  | 0 | 0  | no  | TE |
| at_locus.07522 | 4 | 7,390,942 | 7,390,997 | 5  | 0 | 0  | yes | TE |
| at_locus.07523 | 4 | 7,404,025 | 7,404,068 | 10 | 0 | 0  | no  | TE |
| at_locus.07524 | 4 | 7,425,679 | 7,425,786 | 18 | 1 | 2  | yes | TE |
| at_locus.07525 | 4 | 7,426,152 | 7,426,177 | 11 | 0 | 1  | no  | TE |
| at_locus.07526 | 4 | 7,469,515 | 7,469,534 | 0  | 4 | 0  | yes |    |
| at_locus.07527 | 4 | 7,524,760 | 7,525,160 | 4  | 0 | 0  | yes | TE |
| at_locus.07528 | 4 | 7,526,409 | 7,526,626 | 6  | 0 | 0  | yes | TE |
| at_locus.07529 | 4 | 7,554,975 | 7,555,162 | 5  | 0 | 2  | yes | TE |

|                |   |           |           |     |    |     |     |    |
|----------------|---|-----------|-----------|-----|----|-----|-----|----|
| at_locus.07530 | 4 | 7,555,595 | 7,555,729 | 8   | 0  | 1   | yes |    |
| at_locus.07531 | 4 | 7,556,101 | 7,556,305 | 0   | 0  | 4   | yes |    |
| at_locus.07532 | 4 | 7,564,180 | 7,565,287 | 27  | 0  | 11  | yes | TE |
| at_locus.07533 | 4 | 7,577,976 | 7,578,096 | 6   | 0  | 0   | no  | TE |
| at_locus.07534 | 4 | 7,578,315 | 7,579,092 | 8   | 0  | 4   | no  | TE |
| at_locus.07535 | 4 | 7,591,750 | 7,591,897 | 8   | 0  | 1   | yes |    |
| at_locus.07536 | 4 | 7,592,355 | 7,593,000 | 287 | 5  | 249 | yes |    |
| at_locus.07537 | 4 | 7,593,258 | 7,593,377 | 5   | 0  | 5   | yes | TE |
| at_locus.07538 | 4 | 7,688,034 | 7,688,442 | 11  | 0  | 2   | yes |    |
| at_locus.07539 | 4 | 7,689,488 | 7,689,815 | 6   | 2  | 1   | no  | TE |
| at_locus.07540 | 4 | 7,690,884 | 7,690,955 | 4   | 0  | 0   | no  |    |
| at_locus.07541 | 4 | 7,692,755 | 7,693,082 | 5   | 2  | 1   | no  | TE |
| at_locus.07542 | 4 | 7,694,152 | 7,694,223 | 4   | 0  | 0   | no  |    |
| at_locus.07543 | 4 | 7,696,006 | 7,696,333 | 5   | 2  | 1   | no  | TE |
| at_locus.07544 | 4 | 7,697,403 | 7,697,474 | 4   | 0  | 0   | no  |    |
| at_locus.07545 | 4 | 7,699,257 | 7,699,584 | 6   | 2  | 1   | no  | TE |
| at_locus.07546 | 4 | 7,700,654 | 7,700,725 | 4   | 0  | 0   | no  |    |
| at_locus.07547 | 4 | 7,702,523 | 7,702,850 | 6   | 2  | 0   | yes | TE |
| at_locus.07548 | 4 | 7,703,919 | 7,703,990 | 4   | 0  | 0   | no  |    |
| at_locus.07549 | 4 | 7,735,663 | 7,735,851 | 4   | 0  | 1   | yes |    |
| at_locus.07550 | 4 | 7,774,540 | 7,774,579 | 20  | 0  | 1   | yes |    |
| at_locus.07551 | 4 | 7,784,841 | 7,785,062 | 1   | 0  | 3   | yes |    |
| at_locus.07552 | 4 | 7,812,962 | 7,813,195 | 6   | 0  | 5   | yes |    |
| at_locus.07553 | 4 | 7,816,823 | 7,817,642 | 61  | 1  | 7   | yes | TE |
| at_locus.07554 | 4 | 7,818,175 | 7,818,532 | 19  | 1  | 13  | no  | TE |
| at_locus.07555 | 4 | 7,819,155 | 7,820,417 | 53  | 0  | 18  | yes | TE |
| at_locus.07556 | 4 | 7,820,893 | 7,821,787 | 78  | 1  | 18  | no  | TE |
| at_locus.07557 | 4 | 7,830,191 | 7,830,377 | 22  | 0  | 1   | no  | TE |
| at_locus.07558 | 4 | 7,838,299 | 7,838,628 | 14  | 0  | 1   | yes | TE |
| at_locus.07559 | 4 | 7,853,102 | 7,853,136 | 10  | 0  | 0   | no  | TE |
| at_locus.07560 | 4 | 7,853,444 | 7,853,529 | 16  | 0  | 0   | no  | TE |
| at_locus.07561 | 4 | 7,863,456 | 7,863,537 | 6   | 0  | 1   | yes |    |
| at_locus.07562 | 4 | 7,870,494 | 7,870,515 | 0   | 4  | 0   | yes |    |
| at_locus.07563 | 4 | 7,881,787 | 7,882,233 | 8   | 0  | 10  | yes |    |
| at_locus.07564 | 4 | 7,882,844 | 7,882,960 | 5   | 11 | 7   | yes |    |
| at_locus.07565 | 4 | 7,889,809 | 7,889,970 | 4   | 0  | 0   | yes |    |
| at_locus.07566 | 4 | 7,896,301 | 7,896,454 | 6   | 0  | 0   | yes | TE |

|                |   |           |           |    |     |    |     |    |
|----------------|---|-----------|-----------|----|-----|----|-----|----|
| at_locus.07567 | 4 | 7,896,787 | 7,896,992 | 4  | 0   | 0  | yes | TE |
| at_locus.07568 | 4 | 7,905,257 | 7,905,406 | 7  | 0   | 0  | yes | TE |
| at_locus.07569 | 4 | 7,905,691 | 7,906,535 | 26 | 0   | 0  | yes | TE |
| at_locus.07570 | 4 | 7,923,415 | 7,923,702 | 24 | 0   | 0  | yes | TE |
| at_locus.07571 | 4 | 7,944,562 | 7,945,135 | 34 | 1   | 13 | yes |    |
| at_locus.07572 | 4 | 7,988,878 | 7,989,314 | 8  | 0   | 6  | yes |    |
| at_locus.07573 | 4 | 8,030,375 | 8,030,678 | 11 | 0   | 0  | yes | TE |
| at_locus.07574 | 4 | 8,056,214 | 8,056,390 | 0  | 4   | 1  | yes |    |
| at_locus.07575 | 4 | 8,063,572 | 8,063,657 | 11 | 0   | 0  | no  | TE |
| at_locus.07576 | 4 | 8,064,313 | 8,064,597 | 8  | 0   | 0  | no  | TE |
| at_locus.07577 | 4 | 8,064,852 | 8,065,028 | 14 | 0   | 0  | no  | TE |
| at_locus.07578 | 4 | 8,065,263 | 8,065,697 | 49 | 4   | 0  | no  | TE |
| at_locus.07579 | 4 | 8,130,637 | 8,130,756 | 13 | 0   | 1  | no  | TE |
| at_locus.07580 | 4 | 8,131,079 | 8,131,187 | 4  | 0   | 0  | no  | TE |
| at_locus.07581 | 4 | 8,131,458 | 8,131,766 | 3  | 0   | 4  | yes |    |
| at_locus.07582 | 4 | 8,141,904 | 8,141,930 | 5  | 0   | 0  | yes | TE |
| at_locus.07583 | 4 | 8,262,310 | 8,262,797 | 8  | 0   | 0  | yes |    |
| at_locus.07584 | 4 | 8,263,440 | 8,263,704 | 9  | 1   | 0  | yes |    |
| at_locus.07585 | 4 | 8,264,991 | 8,265,091 | 9  | 0   | 1  | yes |    |
| at_locus.07586 | 4 | 8,265,298 | 8,265,536 | 5  | 0   | 1  | yes |    |
| at_locus.07587 | 4 | 8,271,325 | 8,271,446 | 5  | 0   | 0  | yes |    |
| at_locus.07588 | 4 | 8,317,682 | 8,317,859 | 0  | 0   | 4  | yes | TE |
| at_locus.07589 | 4 | 8,326,934 | 8,327,105 | 7  | 0   | 0  | yes |    |
| at_locus.07590 | 4 | 8,345,638 | 8,345,720 | 12 | 0   | 0  | yes | TE |
| at_locus.07591 | 4 | 8,404,454 | 8,404,546 | 0  | 0   | 6  | yes |    |
| at_locus.07592 | 4 | 8,404,629 | 8,404,863 | 5  | 0   | 0  | yes |    |
| at_locus.07593 | 4 | 8,405,132 | 8,405,273 | 14 | 0   | 0  | yes |    |
| at_locus.07594 | 4 | 8,421,279 | 8,421,877 | 24 | 0   | 0  | no  | TE |
| at_locus.07595 | 4 | 8,442,918 | 8,443,022 | 12 | 0   | 2  | no  | TE |
| at_locus.07596 | 4 | 8,459,705 | 8,459,730 | 1  | 11  | 21 | no  |    |
| at_locus.07597 | 4 | 8,460,051 | 8,460,227 | 0  | 4   | 1  | yes |    |
| at_locus.07598 | 4 | 8,465,849 | 8,466,000 | 9  | 0   | 0  | yes | TE |
| at_locus.07599 | 4 | 8,504,140 | 8,504,304 | 35 | 111 | 26 | yes |    |
| at_locus.07600 | 4 | 8,564,183 | 8,564,433 | 6  | 0   | 1  | no  | TE |
| at_locus.07601 | 4 | 8,564,643 | 8,564,907 | 16 | 0   | 2  | yes | TE |
| at_locus.07602 | 4 | 8,621,851 | 8,622,163 | 0  | 0   | 5  | no  |    |
| at_locus.07603 | 4 | 8,670,539 | 8,670,745 | 7  | 0   | 2  | yes |    |

|                |   |           |           |    |   |    |     |    |
|----------------|---|-----------|-----------|----|---|----|-----|----|
| at_locus.07604 | 4 | 8,671,066 | 8,671,164 | 11 | 0 | 0  | yes |    |
| at_locus.07606 | 4 | 8,718,281 | 8,718,422 | 9  | 0 | 0  | no  |    |
| at_locus.07607 | 4 | 8,728,217 | 8,729,738 | 77 | 2 | 1  | yes | TE |
| at_locus.07608 | 4 | 8,730,411 | 8,730,453 | 9  | 0 | 0  | no  | TE |
| at_locus.07609 | 4 | 8,769,247 | 8,769,297 | 4  | 0 | 0  | no  | TE |
| at_locus.07610 | 4 | 8,799,114 | 8,799,504 | 49 | 4 | 15 | yes | TE |
| at_locus.07611 | 4 | 8,802,132 | 8,802,481 | 4  | 0 | 0  | no  | TE |
| at_locus.07612 | 4 | 8,802,811 | 8,802,914 | 7  | 0 | 1  | no  | TE |
| at_locus.07613 | 4 | 8,803,713 | 8,803,789 | 12 | 0 | 0  | no  | TE |
| at_locus.07614 | 4 | 8,811,442 | 8,811,465 | 4  | 0 | 0  | no  | TE |
| at_locus.07615 | 4 | 8,819,905 | 8,820,021 | 16 | 0 | 0  | no  | TE |
| at_locus.07616 | 4 | 8,836,589 | 8,836,875 | 7  | 0 | 1  | yes | TE |
| at_locus.07617 | 4 | 8,858,741 | 8,858,970 | 8  | 0 | 0  | yes | TE |
| at_locus.07618 | 4 | 8,899,077 | 8,899,164 | 5  | 0 | 0  | no  | TE |
| at_locus.07619 | 4 | 8,899,746 | 8,900,014 | 11 | 0 | 0  | yes | TE |
| at_locus.07620 | 4 | 8,901,545 | 8,901,752 | 2  | 0 | 4  | yes | TE |
| at_locus.07621 | 4 | 8,903,704 | 8,903,891 | 1  | 0 | 4  | yes | TE |
| at_locus.07622 | 4 | 8,905,947 | 8,906,145 | 5  | 0 | 3  | yes |    |
| at_locus.07623 | 4 | 8,942,395 | 8,943,053 | 11 | 0 | 15 | yes |    |
| at_locus.07624 | 4 | 8,947,560 | 8,947,723 | 9  | 0 | 0  | no  | TE |
| at_locus.07625 | 4 | 8,947,995 | 8,948,494 | 23 | 0 | 28 | yes |    |
| at_locus.07626 | 4 | 8,958,029 | 8,958,539 | 15 | 0 | 2  | no  | TE |
| at_locus.07627 | 4 | 8,959,645 | 8,959,756 | 5  | 0 | 0  | yes |    |
| at_locus.07628 | 4 | 9,048,999 | 9,049,481 | 15 | 0 | 4  | yes | TE |
| at_locus.07629 | 4 | 9,079,174 | 9,079,474 | 27 | 0 | 1  | no  | TE |
| at_locus.07630 | 4 | 9,111,605 | 9,111,803 | 17 | 0 | 0  | no  | TE |
| at_locus.07631 | 4 | 9,112,030 | 9,112,117 | 7  | 0 | 0  | no  | TE |
| at_locus.07632 | 4 | 9,145,318 | 9,145,617 | 2  | 0 | 10 | yes |    |
| at_locus.07633 | 4 | 9,146,491 | 9,146,941 | 28 | 0 | 0  | no  | TE |
| at_locus.07634 | 4 | 9,162,271 | 9,162,703 | 26 | 2 | 39 | yes |    |
| at_locus.07635 | 4 | 9,163,478 | 9,163,793 | 66 | 1 | 29 | yes |    |
| at_locus.07636 | 4 | 9,172,824 | 9,172,860 | 5  | 0 | 5  | no  |    |
| at_locus.07637 | 4 | 9,188,783 | 9,189,207 | 4  | 0 | 1  | yes | TE |
| at_locus.07638 | 4 | 9,192,560 | 9,192,646 | 6  | 0 | 0  | no  | TE |
| at_locus.07639 | 4 | 9,284,802 | 9,284,913 | 48 | 1 | 4  | no  | TE |
| at_locus.07640 | 4 | 9,309,329 | 9,309,580 | 5  | 0 | 0  | yes |    |
| at_locus.07641 | 4 | 9,320,427 | 9,320,575 | 10 | 0 | 0  | no  | TE |

|                |   |            |            |    |    |    |     |    |
|----------------|---|------------|------------|----|----|----|-----|----|
| at_locus.07642 | 4 | 9,357,154  | 9,357,385  | 11 | 0  | 0  | yes | TE |
| at_locus.07643 | 4 | 9,368,743  | 9,369,020  | 16 | 1  | 2  | no  | TE |
| at_locus.07644 | 4 | 9,438,856  | 9,438,889  | 5  | 0  | 0  | no  | TE |
| at_locus.07645 | 4 | 9,440,050  | 9,440,326  | 21 | 0  | 0  | no  | TE |
| at_locus.07646 | 4 | 9,521,335  | 9,521,472  | 5  | 0  | 1  | no  |    |
| at_locus.07647 | 4 | 9,541,326  | 9,541,463  | 5  | 0  | 1  | no  |    |
| at_locus.07648 | 4 | 9,560,801  | 9,560,907  | 6  | 0  | 0  | yes |    |
| at_locus.07649 | 4 | 9,570,515  | 9,571,334  | 41 | 3  | 10 | yes | TE |
| at_locus.07650 | 4 | 9,571,885  | 9,572,441  | 14 | 0  | 12 | yes | TE |
| at_locus.07651 | 4 | 9,573,283  | 9,574,275  | 20 | 0  | 10 | yes | TE |
| at_locus.07652 | 4 | 9,574,647  | 9,575,618  | 25 | 3  | 18 | no  | TE |
| at_locus.07653 | 4 | 9,762,939  | 9,763,151  | 4  | 0  | 0  | no  | TE |
| at_locus.07654 | 4 | 9,763,742  | 9,763,827  | 12 | 0  | 0  | no  | TE |
| at_locus.07655 | 4 | 9,795,572  | 9,795,793  | 6  | 0  | 3  | no  | TE |
| at_locus.07656 | 4 | 9,797,190  | 9,797,803  | 11 | 0  | 2  | yes | TE |
| at_locus.07657 | 4 | 9,798,404  | 9,798,616  | 5  | 0  | 1  | yes | TE |
| at_locus.07658 | 4 | 9,800,976  | 9,801,122  | 5  | 0  | 6  | yes |    |
| at_locus.07659 | 4 | 9,802,024  | 9,802,520  | 8  | 1  | 16 | yes |    |
| at_locus.07660 | 4 | 9,842,579  | 9,842,613  | 8  | 0  | 0  | no  | TE |
| at_locus.07661 | 4 | 9,888,999  | 9,889,019  | 8  | 36 | 17 | no  |    |
| at_locus.07662 | 4 | 9,909,014  | 9,909,107  | 25 | 1  | 0  | no  | TE |
| at_locus.07663 | 4 | 9,909,194  | 9,910,000  | 12 | 0  | 17 | yes | TE |
| at_locus.07664 | 4 | 9,910,390  | 9,910,719  | 10 | 0  | 2  | yes | TE |
| at_locus.07665 | 4 | 9,910,943  | 9,911,675  | 12 | 0  | 14 | no  | TE |
| at_locus.07666 | 4 | 9,912,341  | 9,912,816  | 16 | 0  | 13 | no  | TE |
| at_locus.07667 | 4 | 9,913,314  | 9,913,997  | 51 | 1  | 6  | no  | TE |
| at_locus.07668 | 4 | 9,954,287  | 9,954,316  | 0  | 0  | 4  | no  | TE |
| at_locus.07669 | 4 | 9,955,331  | 9,955,501  | 3  | 0  | 7  | no  | TE |
| at_locus.07670 | 4 | 9,955,733  | 9,957,222  | 21 | 2  | 26 | yes | TE |
| at_locus.07671 | 4 | 9,961,928  | 9,962,287  | 26 | 2  | 4  | yes |    |
| at_locus.07672 | 4 | 9,989,432  | 9,990,325  | 35 | 0  | 32 | yes | TE |
| at_locus.07673 | 4 | 10,112,321 | 10,112,479 | 4  | 14 | 8  | yes |    |
| at_locus.07674 | 4 | 10,171,555 | 10,171,826 | 4  | 0  | 1  | yes |    |
| at_locus.07675 | 4 | 10,175,027 | 10,175,288 | 4  | 0  | 1  | yes | TE |
| at_locus.07676 | 4 | 10,178,806 | 10,179,090 | 4  | 0  | 0  | yes |    |
| at_locus.07677 | 4 | 10,189,583 | 10,189,665 | 7  | 0  | 0  | yes |    |
| at_locus.07678 | 4 | 10,266,517 | 10,266,638 | 10 | 0  | 0  | yes |    |

|                |   |            |            |    |     |     |     |    |
|----------------|---|------------|------------|----|-----|-----|-----|----|
| at_locus.07679 | 4 | 10,270,525 | 10,270,968 | 8  | 0   | 6   | no  | TE |
| at_locus.07680 | 4 | 10,271,210 | 10,271,294 | 5  | 0   | 1   | no  | TE |
| at_locus.07682 | 4 | 10,359,619 | 10,359,670 | 6  | 0   | 0   | yes |    |
| at_locus.07683 | 4 | 10,395,488 | 10,395,796 | 25 | 1   | 0   | no  | TE |
| at_locus.07684 | 4 | 10,396,032 | 10,396,109 | 24 | 0   | 0   | no  | TE |
| at_locus.07685 | 4 | 10,396,346 | 10,396,664 | 13 | 0   | 0   | no  | TE |
| at_locus.07686 | 4 | 10,401,474 | 10,401,729 | 8  | 0   | 0   | yes | TE |
| at_locus.07687 | 4 | 10,427,196 | 10,427,338 | 15 | 0   | 1   | yes | TE |
| at_locus.07688 | 4 | 10,492,600 | 10,492,663 | 11 | 0   | 0   | yes |    |
| at_locus.07689 | 4 | 10,538,729 | 10,539,502 | 25 | 0   | 11  | no  | TE |
| at_locus.07690 | 4 | 10,544,953 | 10,545,309 | 4  | 0   | 1   | no  | TE |
| at_locus.07691 | 4 | 10,545,536 | 10,545,890 | 8  | 0   | 7   | no  | TE |
| at_locus.07692 | 4 | 10,547,721 | 10,547,801 | 4  | 0   | 0   | no  | TE |
| at_locus.07693 | 4 | 10,547,826 | 10,548,062 | 0  | 0   | 4   | no  | TE |
| at_locus.07694 | 4 | 10,578,663 | 10,578,768 | 68 | 167 | 156 | yes |    |
| at_locus.07695 | 4 | 10,631,338 | 10,631,388 | 15 | 0   | 2   | no  | TE |
| at_locus.07696 | 4 | 10,633,369 | 10,633,568 | 16 | 1   | 0   | yes | TE |
| at_locus.07697 | 4 | 10,647,449 | 10,647,491 | 4  | 0   | 1   | yes | TE |
| at_locus.07698 | 4 | 10,648,456 | 10,648,669 | 5  | 0   | 0   | yes | TE |
| at_locus.07699 | 4 | 10,711,731 | 10,711,752 | 0  | 1   | 5   | yes |    |
| at_locus.07700 | 4 | 10,716,795 | 10,716,908 | 6  | 0   | 0   | yes |    |
| at_locus.07701 | 4 | 10,770,215 | 10,770,880 | 20 | 0   | 28  | yes | TE |
| at_locus.07702 | 4 | 10,792,618 | 10,792,707 | 9  | 0   | 0   | yes | TE |
| at_locus.07703 | 4 | 10,870,831 | 10,870,884 | 6  | 0   | 0   | yes | TE |
| at_locus.07704 | 4 | 10,899,579 | 10,900,284 | 37 | 3   | 5   | yes | TE |
| at_locus.07705 | 4 | 10,901,093 | 10,901,450 | 15 | 1   | 10  | no  | TE |
| at_locus.07706 | 4 | 10,901,678 | 10,902,093 | 5  | 0   | 1   | no  | TE |
| at_locus.07707 | 4 | 10,902,310 | 10,903,423 | 53 | 0   | 12  | no  | TE |
| at_locus.07708 | 4 | 10,903,714 | 10,904,865 | 70 | 3   | 22  | yes | TE |
| at_locus.07709 | 4 | 10,959,574 | 10,959,766 | 5  | 0   | 0   | yes | TE |
| at_locus.07710 | 4 | 11,000,374 | 11,000,546 | 5  | 0   | 0   | yes | TE |
| at_locus.07711 | 4 | 11,080,621 | 11,081,394 | 24 | 0   | 10  | no  | TE |
| at_locus.07712 | 4 | 11,097,759 | 11,097,927 | 1  | 0   | 5   | no  | TE |
| at_locus.07713 | 4 | 11,109,909 | 11,109,944 | 6  | 0   | 1   | no  | TE |
| at_locus.07714 | 4 | 11,111,789 | 11,112,034 | 6  | 0   | 5   | no  | TE |
| at_locus.07715 | 4 | 11,112,942 | 11,112,964 | 4  | 0   | 0   | yes | TE |
| at_locus.07716 | 4 | 11,123,763 | 11,124,454 | 11 | 1   | 10  | yes | TE |

|                |   |            |            |     |      |     |     |    |
|----------------|---|------------|------------|-----|------|-----|-----|----|
| at_locus.07717 | 4 | 11,137,555 | 11,137,936 | 17  | 0    | 4   | no  | TE |
| at_locus.07718 | 4 | 11,139,089 | 11,139,299 | 4   | 0    | 0   | yes | TE |
| at_locus.07719 | 4 | 11,192,288 | 11,193,103 | 87  | 5    | 2   | no  | TE |
| at_locus.07720 | 4 | 11,193,329 | 11,193,579 | 6   | 1    | 0   | no  | TE |
| at_locus.07721 | 4 | 11,208,605 | 11,209,309 | 1   | 0    | 2   | no  |    |
| at_locus.07722 | 4 | 11,224,594 | 11,224,727 | 4   | 0    | 0   | no  | TE |
| at_locus.07723 | 4 | 11,230,775 | 11,230,945 | 7   | 0    | 0   | no  |    |
| at_locus.07724 | 4 | 11,231,606 | 11,231,638 | 4   | 0    | 1   | yes |    |
| at_locus.07725 | 4 | 11,255,773 | 11,255,849 | 4   | 0    | 0   | yes |    |
| at_locus.07726 | 4 | 11,360,881 | 11,360,966 | 16  | 0    | 0   | no  | TE |
| at_locus.07727 | 4 | 11,361,575 | 11,361,887 | 10  | 0    | 0   | no  | TE |
| at_locus.07728 | 4 | 11,362,109 | 11,362,424 | 31  | 3    | 0   | no  | TE |
| at_locus.07729 | 4 | 11,362,663 | 11,362,733 | 11  | 0    | 0   | no  | TE |
| at_locus.07730 | 4 | 11,375,389 | 11,375,567 | 43  | 94   | 78  | yes |    |
| at_locus.07731 | 4 | 11,383,494 | 11,384,508 | 52  | 80   | 169 | yes |    |
| at_locus.07732 | 4 | 11,389,409 | 11,389,546 | 6   | 4    | 5   | no  |    |
| at_locus.07733 | 4 | 11,474,349 | 11,474,840 | 26  | 4    | 30  | yes |    |
| at_locus.07734 | 4 | 11,475,101 | 11,475,276 | 7   | 0    | 2   | yes |    |
| at_locus.07735 | 4 | 11,483,103 | 11,483,127 | 15  | 18   | 25  | yes |    |
| at_locus.07736 | 4 | 11,676,530 | 11,676,779 | 9   | 0    | 0   | no  | TE |
| at_locus.07737 | 4 | 11,677,076 | 11,677,386 | 1   | 0    | 5   | no  | TE |
| at_locus.07738 | 4 | 11,677,778 | 11,678,283 | 2   | 0    | 5   | no  | TE |
| at_locus.07739 | 4 | 11,678,984 | 11,679,410 | 1   | 0    | 4   | yes | TE |
| at_locus.07740 | 4 | 11,679,631 | 11,679,800 | 5   | 0    | 0   | no  | TE |
| at_locus.07741 | 4 | 11,681,218 | 11,681,296 | 5   | 0    | 0   | no  | TE |
| at_locus.07742 | 4 | 11,696,232 | 11,696,384 | 4   | 0    | 0   | yes | TE |
| at_locus.07744 | 4 | 11,829,277 | 11,829,514 | 0   | 0    | 9   | yes |    |
| at_locus.07745 | 4 | 11,832,464 | 11,833,048 | 14  | 0    | 7   | yes |    |
| at_locus.07746 | 4 | 11,834,142 | 11,834,353 | 4   | 0    | 1   | yes | TE |
| at_locus.07747 | 4 | 11,837,418 | 11,838,015 | 7   | 0    | 4   | no  | TE |
| at_locus.07748 | 4 | 11,962,971 | 11,962,991 | 0   | 4    | 5   | yes |    |
| at_locus.07749 | 4 | 11,963,519 | 11,963,799 | 14  | 0    | 0   | yes |    |
| at_locus.07750 | 4 | 11,979,524 | 11,979,576 | 7   | 0    | 0   | yes | TE |
| at_locus.07751 | 4 | 12,093,350 | 12,093,987 | 28  | 0    | 11  | yes | TE |
| at_locus.07752 | 4 | 12,225,624 | 12,225,786 | 2   | 5    | 5   | yes |    |
| at_locus.07753 | 4 | 12,352,970 | 12,353,140 | 162 | 1541 | 365 | yes |    |
| at_locus.07754 | 4 | 12,365,076 | 12,365,217 | 7   | 0    | 0   | yes | TE |

|                |   |            |            |     |     |     |     |    |
|----------------|---|------------|------------|-----|-----|-----|-----|----|
| at_locus.07755 | 4 | 12,365,526 | 12,365,616 | 7   | 0   | 0   | no  | TE |
| at_locus.07756 | 4 | 12,433,581 | 12,433,633 | 11  | 0   | 4   | no  |    |
| at_locus.07757 | 4 | 12,433,895 | 12,435,371 | 172 | 3   | 147 | yes | TE |
| at_locus.07758 | 4 | 12,484,601 | 12,485,624 | 79  | 1   | 74  | yes |    |
| at_locus.07759 | 4 | 12,566,203 | 12,566,228 | 0   | 4   | 0   | yes |    |
| at_locus.07760 | 4 | 12,598,939 | 12,599,285 | 8   | 0   | 14  | yes |    |
| at_locus.07761 | 4 | 12,606,611 | 12,607,055 | 19  | 0   | 1   | no  | TE |
| at_locus.07762 | 4 | 12,625,138 | 12,625,159 | 242 | 358 | 156 | yes |    |
| at_locus.07763 | 4 | 12,699,247 | 12,699,374 | 8   | 0   | 0   | no  | TE |
| at_locus.07764 | 4 | 12,700,312 | 12,700,512 | 6   | 1   | 1   | yes |    |
| at_locus.07765 | 4 | 12,713,183 | 12,713,377 | 4   | 0   | 0   | yes |    |
| at_locus.07766 | 4 | 12,713,697 | 12,714,031 | 7   | 0   | 1   | yes |    |
| at_locus.07767 | 4 | 12,768,852 | 12,769,214 | 14  | 0   | 0   | yes |    |
| at_locus.07768 | 4 | 12,829,446 | 12,829,789 | 23  | 0   | 0   | yes |    |
| at_locus.07769 | 4 | 12,830,198 | 12,830,284 | 7   | 0   | 0   | no  | TE |
| at_locus.07770 | 4 | 12,841,560 | 12,842,654 | 114 | 1   | 153 | yes |    |
| at_locus.07771 | 4 | 12,842,789 | 12,843,258 | 37  | 0   | 10  | yes |    |
| at_locus.07772 | 4 | 12,844,158 | 12,844,491 | 7   | 0   | 1   | yes | TE |
| at_locus.07773 | 4 | 12,844,981 | 12,845,031 | 4   | 0   | 0   | no  | TE |
| at_locus.07774 | 4 | 12,862,611 | 12,862,694 | 7   | 0   | 3   | yes |    |
| at_locus.07775 | 4 | 12,863,172 | 12,863,625 | 50  | 3   | 37  | yes |    |
| at_locus.07776 | 4 | 12,870,937 | 12,870,956 | 0   | 4   | 0   | yes |    |
| at_locus.07777 | 4 | 12,892,470 | 12,892,732 | 10  | 0   | 0   | no  |    |
| at_locus.07778 | 4 | 13,020,009 | 13,020,031 | 4   | 0   | 0   | yes |    |
| at_locus.07779 | 4 | 13,038,441 | 13,038,675 | 3   | 0   | 0   | yes |    |
| at_locus.07780 | 4 | 13,123,984 | 13,124,410 | 10  | 0   | 0   | yes | TE |
| at_locus.07781 | 4 | 13,293,105 | 13,293,238 | 31  | 0   | 3   | yes |    |
| at_locus.07782 | 4 | 13,294,077 | 13,294,948 | 30  | 0   | 2   | yes |    |
| at_locus.07783 | 4 | 13,295,849 | 13,296,116 | 8   | 46  | 6   | yes |    |
| at_locus.07784 | 4 | 13,329,128 | 13,329,153 | 5   | 0   | 0   | no  | TE |
| at_locus.07785 | 4 | 13,369,578 | 13,369,927 | 16  | 0   | 0   | yes |    |
| at_locus.07786 | 4 | 13,418,363 | 13,418,485 | 9   | 0   | 2   | yes | TE |
| at_locus.07787 | 4 | 13,419,272 | 13,419,307 | 10  | 0   | 0   | no  | TE |
| at_locus.07789 | 4 | 13,472,574 | 13,473,104 | 21  | 2   | 40  | yes |    |
| at_locus.07790 | 4 | 13,537,110 | 13,537,223 | 5   | 0   | 1   | no  | TE |
| at_locus.07791 | 4 | 13,537,584 | 13,537,934 | 8   | 0   | 1   | no  | TE |
| at_locus.07792 | 4 | 13,580,308 | 13,580,727 | 12  | 1   | 5   | yes |    |



|                |   |            |            |     |    |     |     |    |
|----------------|---|------------|------------|-----|----|-----|-----|----|
| at_locus.07793 | 4 | 13,657,048 | 13,657,406 | 62  | 3  | 0   | yes |    |
| at_locus.07794 | 4 | 13,782,215 | 13,782,316 | 11  | 38 | 13  | no  |    |
| at_locus.07795 | 4 | 13,887,324 | 13,887,365 | 5   | 0  | 0   | no  | TE |
| at_locus.07796 | 4 | 13,902,645 | 13,903,244 | 255 | 9  | 250 | yes |    |
| at_locus.07797 | 4 | 13,951,402 | 13,951,804 | 20  | 1  | 11  | no  |    |
| at_locus.07798 | 4 | 14,045,658 | 14,045,723 | 14  | 0  | 0   | yes |    |
| at_locus.07799 | 4 | 14,122,137 | 14,122,416 | 23  | 0  | 0   | yes | TE |
| at_locus.07800 | 4 | 14,249,982 | 14,250,939 | 24  | 0  | 7   | yes | TE |
| at_locus.07801 | 4 | 14,267,972 | 14,268,013 | 3   | 0  | 4   | yes |    |
| at_locus.07802 | 4 | 14,272,265 | 14,272,650 | 5   | 2  | 4   | yes |    |
| at_locus.07803 | 4 | 14,280,453 | 14,280,774 | 2   | 0  | 5   | no  | TE |
| at_locus.07804 | 4 | 14,281,150 | 14,281,616 | 0   | 1  | 7   | no  | TE |
| at_locus.07805 | 4 | 14,281,626 | 14,281,931 | 4   | 0  | 0   | no  | TE |
| at_locus.07806 | 4 | 14,282,304 | 14,282,540 | 6   | 0  | 1   | no  | TE |
| at_locus.07807 | 4 | 14,283,327 | 14,283,459 | 4   | 0  | 3   | no  | TE |
| at_locus.07808 | 4 | 14,283,887 | 14,285,299 | 18  | 0  | 15  | no  | TE |
| at_locus.07809 | 4 | 14,285,557 | 14,286,489 | 5   | 0  | 7   | no  | TE |
| at_locus.07810 | 4 | 14,287,984 | 14,288,282 | 10  | 0  | 6   | yes | TE |
| at_locus.07811 | 4 | 14,328,124 | 14,328,154 | 18  | 1  | 5   | yes | TE |
| at_locus.07812 | 4 | 14,333,576 | 14,333,697 | 7   | 0  | 0   | yes | TE |
| at_locus.07813 | 4 | 14,390,270 | 14,390,986 | 28  | 1  | 1   | no  | TE |
| at_locus.07814 | 4 | 14,434,147 | 14,434,224 | 5   | 0  | 0   | yes |    |
| at_locus.07815 | 4 | 14,457,840 | 14,457,955 | 10  | 0  | 0   | no  | TE |
| at_locus.07816 | 4 | 14,458,219 | 14,458,288 | 10  | 0  | 0   | no  | TE |
| at_locus.07817 | 4 | 14,531,285 | 14,532,264 | 152 | 7  | 119 | yes |    |
| at_locus.07818 | 4 | 14,546,370 | 14,546,555 | 5   | 0  | 0   | yes |    |
| at_locus.07819 | 4 | 14,582,246 | 14,582,459 | 13  | 0  | 0   | yes | TE |
| at_locus.07820 | 4 | 14,887,485 | 14,887,557 | 5   | 0  | 0   | yes | TE |
| at_locus.07821 | 4 | 14,967,295 | 14,967,658 | 6   | 0  | 0   | no  |    |
| at_locus.07822 | 4 | 14,977,988 | 14,978,196 | 1   | 0  | 4   | yes | TE |
| at_locus.07823 | 4 | 14,979,181 | 14,979,649 | 9   | 0  | 2   | yes | TE |
| at_locus.07824 | 4 | 14,987,616 | 14,987,909 | 7   | 0  | 0   | no  |    |
| at_locus.07825 | 4 | 14,989,053 | 14,989,079 | 0   | 0  | 4   | no  |    |
| at_locus.07826 | 4 | 14,989,666 | 14,989,695 | 8   | 1  | 1   | no  |    |
| at_locus.07827 | 4 | 15,012,661 | 15,013,128 | 23  | 0  | 1   | no  | TE |
| at_locus.07828 | 4 | 15,013,417 | 15,013,705 | 2   | 0  | 3   | no  | TE |
| at_locus.07829 | 4 | 15,013,921 | 15,014,171 | 6   | 0  | 0   | no  | TE |

|                |   |            |            |    |    |    |     |    |
|----------------|---|------------|------------|----|----|----|-----|----|
| at_locus.07830 | 4 | 15,014,456 | 15,014,861 | 6  | 0  | 5  | no  | TE |
| at_locus.07831 | 4 | 15,065,926 | 15,066,001 | 7  | 0  | 0  | yes |    |
| at_locus.07832 | 4 | 15,066,624 | 15,066,732 | 5  | 0  | 0  | yes | TE |
| at_locus.07833 | 4 | 15,074,951 | 15,075,032 | 28 | 64 | 12 | yes |    |
| at_locus.07834 | 4 | 15,250,154 | 15,250,171 | 0  | 0  | 43 | no  |    |
| at_locus.07835 | 4 | 15,373,536 | 15,373,569 | 4  | 0  | 0  | yes |    |
| at_locus.07836 | 4 | 15,415,432 | 15,415,516 | 28 | 66 | 11 | yes |    |
| at_locus.07837 | 4 | 15,441,659 | 15,442,192 | 14 | 0  | 2  | no  | TE |
| at_locus.07838 | 4 | 15,466,957 | 15,467,125 | 2  | 2  | 8  | yes |    |
| at_locus.07839 | 4 | 15,481,594 | 15,481,614 | 0  | 4  | 0  | yes |    |
| at_locus.07840 | 4 | 15,595,869 | 15,596,111 | 14 | 0  | 0  | yes | TE |
| at_locus.07841 | 4 | 15,596,379 | 15,596,714 | 20 | 0  | 2  | yes | TE |
| at_locus.07842 | 4 | 15,695,697 | 15,696,139 | 33 | 0  | 0  | yes |    |
| at_locus.07843 | 4 | 15,696,384 | 15,696,650 | 17 | 2  | 4  | yes |    |
| at_locus.07844 | 4 | 15,698,776 | 15,699,214 | 4  | 0  | 0  | yes | TE |
| at_locus.07845 | 4 | 15,816,200 | 15,816,685 | 12 | 0  | 0  | yes | TE |
| at_locus.07846 | 4 | 15,860,163 | 15,860,289 | 5  | 0  | 0  | yes |    |
| at_locus.07847 | 4 | 15,922,841 | 15,922,998 | 8  | 0  | 1  | yes | TE |
| at_locus.07848 | 4 | 15,923,872 | 15,924,046 | 21 | 1  | 2  | yes | TE |
| at_locus.07849 | 4 | 15,965,123 | 15,965,242 | 2  | 13 | 9  | yes |    |
| at_locus.07850 | 4 | 16,055,389 | 16,055,607 | 8  | 0  | 1  | no  | TE |
| at_locus.07851 | 4 | 16,058,592 | 16,058,754 | 9  | 1  | 0  | no  |    |
| at_locus.07852 | 4 | 16,320,964 | 16,321,022 | 5  | 0  | 1  | no  |    |
| at_locus.07853 | 4 | 16,325,471 | 16,325,867 | 7  | 0  | 1  | yes |    |
| at_locus.07854 | 4 | 16,481,286 | 16,481,320 | 1  | 0  | 0  | no  |    |
| at_locus.07855 | 4 | 16,555,570 | 16,556,117 | 16 | 0  | 12 | yes |    |
| at_locus.07856 | 4 | 16,729,235 | 16,729,390 | 5  | 0  | 0  | yes | TE |
| at_locus.07857 | 4 | 16,754,852 | 16,754,931 | 11 | 30 | 8  | no  |    |
| at_locus.07858 | 4 | 16,863,270 | 16,863,704 | 12 | 0  | 0  | no  | TE |
| at_locus.07859 | 4 | 16,863,939 | 16,864,313 | 14 | 0  | 0  | no  | TE |
| at_locus.07860 | 4 | 16,864,990 | 16,865,075 | 16 | 0  | 0  | no  | TE |
| at_locus.07861 | 4 | 16,921,038 | 16,921,109 | 10 | 0  | 0  | no  |    |
| at_locus.07862 | 4 | 17,081,149 | 17,081,526 | 5  | 0  | 1  | yes |    |
| at_locus.07863 | 4 | 17,081,741 | 17,081,771 | 9  | 1  | 0  | yes |    |
| at_locus.07865 | 4 | 17,212,671 | 17,213,201 | 8  | 1  | 15 | yes |    |
| at_locus.07866 | 4 | 17,213,956 | 17,214,000 | 10 | 0  | 2  | yes |    |
| at_locus.07867 | 4 | 17,227,517 | 17,227,693 | 13 | 0  | 7  | yes |    |

|                |   |            |            |     |     |     |     |    |
|----------------|---|------------|------------|-----|-----|-----|-----|----|
| at_locus.07868 | 4 | 17,448,981 | 17,449,122 | 4   | 0   | 0   | no  | TE |
| at_locus.07869 | 4 | 17,449,811 | 17,450,736 | 12  | 0   | 6   | yes | TE |
| at_locus.07870 | 4 | 17,624,724 | 17,625,083 | 5   | 0   | 0   | yes |    |
| at_locus.07871 | 4 | 17,636,539 | 17,637,971 | 73  | 2   | 53  | yes |    |
| at_locus.07872 | 4 | 17,638,239 | 17,638,344 | 5   | 0   | 1   | yes |    |
| at_locus.07873 | 4 | 17,654,922 | 17,655,065 | 15  | 0   | 2   | yes | TE |
| at_locus.07874 | 4 | 17,655,895 | 17,655,947 | 8   | 0   | 0   | no  | TE |
| at_locus.07875 | 4 | 17,711,808 | 17,711,856 | 2   | 0   | 5   | yes |    |
| at_locus.07876 | 4 | 18,087,253 | 18,087,382 | 0   | 2   | 1   | no  | TE |
| at_locus.07877 | 4 | 18,132,998 | 18,133,026 | 1   | 0   | 4   | no  |    |
| at_locus.07878 | 4 | 18,182,269 | 18,182,707 | 7   | 0   | 3   | yes |    |
| at_locus.07879 | 4 | 18,232,339 | 18,233,019 | 21  | 0   | 0   | yes |    |
| at_locus.07881 | 4 | 18,255,864 | 18,256,829 | 149 | 4   | 200 | yes |    |
| at_locus.07882 | 4 | 18,280,504 | 18,280,827 | 19  | 0   | 1   | yes |    |
| at_locus.07884 | 4 | 18,362,018 | 18,362,058 | 4   | 0   | 0   | yes |    |
| at_locus.07885 | 4 | 18,482,177 | 18,482,376 | 8   | 0   | 4   | yes |    |
| at_locus.07886 | 4 | 18,532,407 | 18,532,552 | 11  | 0   | 1   | yes | TE |
| at_locus.07888 | 5 | 56,684     | 56,807     | 20  | 0   | 0   | yes | TE |
| at_locus.07889 | 5 | 64,817     | 65,086     | 39  | 0   | 2   | no  | TE |
| at_locus.07890 | 5 | 65,964     | 66,411     | 5   | 0   | 4   | yes | TE |
| at_locus.07891 | 5 | 67,062     | 67,608     | 4   | 0   | 8   | yes | TE |
| at_locus.07892 | 5 | 70,908     | 71,278     | 39  | 0   | 2   | yes | TE |
| at_locus.07893 | 5 | 91,128     | 91,264     | 5   | 0   | 0   | yes |    |
| at_locus.07894 | 5 | 142,609    | 142,632    | 2   | 1   | 8   | yes |    |
| at_locus.07896 | 5 | 179,535    | 180,119    | 9   | 1   | 12  | yes |    |
| at_locus.07897 | 5 | 250,186    | 250,476    | 6   | 0   | 0   | yes |    |
| at_locus.07898 | 5 | 250,805    | 251,117    | 14  | 0   | 0   | yes |    |
| at_locus.07899 | 5 | 287,502    | 287,733    | 188 | 505 | 152 | yes |    |
| at_locus.07900 | 5 | 347,740    | 348,298    | 5   | 0   | 1   | no  | TE |
| at_locus.07901 | 5 | 349,821    | 349,888    | 6   | 0   | 0   | yes | TE |
| at_locus.07902 | 5 | 350,161    | 350,405    | 5   | 0   | 0   | no  | TE |
| at_locus.07903 | 5 | 354,085    | 354,352    | 15  | 0   | 0   | no  | TE |
| at_locus.07904 | 5 | 355,003    | 356,115    | 21  | 2   | 3   | yes | TE |
| at_locus.07905 | 5 | 393,608    | 394,194    | 67  | 0   | 6   | yes | TE |
| at_locus.07906 | 5 | 394,621    | 394,649    | 6   | 0   | 0   | no  | TE |
| at_locus.07907 | 5 | 486,856    | 486,996    | 19  | 1   | 0   | yes |    |
| at_locus.07908 | 5 | 491,820    | 491,965    | 17  | 1   | 0   | yes |    |

|                |   |           |           |     |    |     |     |    |
|----------------|---|-----------|-----------|-----|----|-----|-----|----|
| at_locus.07909 | 5 | 548,550   | 548,575   | 0   | 4  | 0   | no  |    |
| at_locus.07910 | 5 | 660,605   | 660,786   | 4   | 0  | 0   | yes |    |
| at_locus.07911 | 5 | 706,927   | 706,973   | 4   | 0  | 0   | yes | TE |
| at_locus.07912 | 5 | 743,988   | 744,158   | 12  | 0  | 0   | no  | TE |
| at_locus.07913 | 5 | 744,461   | 744,803   | 0   | 0  | 2   | no  | TE |
| at_locus.07914 | 5 | 745,023   | 745,154   | 21  | 0  | 0   | no  | TE |
| at_locus.07915 | 5 | 765,921   | 766,097   | 10  | 0  | 0   | yes |    |
| at_locus.07916 | 5 | 838,175   | 838,329   | 0   | 0  | 4   | yes |    |
| at_locus.07917 | 5 | 838,867   | 839,263   | 10  | 0  | 12  | yes |    |
| at_locus.07919 | 5 | 897,024   | 897,353   | 6   | 25 | 7   | yes |    |
| at_locus.07920 | 5 | 1,026,666 | 1,027,009 | 5   | 0  | 0   | no  | TE |
| at_locus.07921 | 5 | 1,066,139 | 1,066,964 | 11  | 0  | 17  | yes | TE |
| at_locus.07922 | 5 | 1,067,199 | 1,067,626 | 10  | 0  | 0   | no  | TE |
| at_locus.07923 | 5 | 1,115,380 | 1,115,659 | 12  | 0  | 1   | yes |    |
| at_locus.07924 | 5 | 1,181,971 | 1,182,298 | 2   | 0  | 5   | yes |    |
| at_locus.07925 | 5 | 1,188,211 | 1,188,298 | 33  | 97 | 148 | yes |    |
| at_locus.07926 | 5 | 1,229,867 | 1,230,379 | 7   | 0  | 7   | yes |    |
| at_locus.07927 | 5 | 1,322,777 | 1,323,145 | 0   | 0  | 5   | yes |    |
| at_locus.07928 | 5 | 1,410,419 | 1,410,965 | 172 | 2  | 218 | yes |    |
| at_locus.07929 | 5 | 1,411,167 | 1,411,482 | 6   | 1  | 6   | yes |    |
| at_locus.07930 | 5 | 1,486,799 | 1,486,828 | 7   | 0  | 0   | yes |    |
| at_locus.07931 | 5 | 1,501,714 | 1,501,842 | 5   | 0  | 0   | yes |    |
| at_locus.07932 | 5 | 1,516,221 | 1,516,330 | 6   | 0  | 0   | yes | TE |
| at_locus.07933 | 5 | 1,518,770 | 1,519,052 | 22  | 1  | 0   | yes |    |
| at_locus.07934 | 5 | 1,655,045 | 1,655,275 | 13  | 0  | 11  | yes |    |
| at_locus.07935 | 5 | 1,754,927 | 1,754,974 | 11  | 0  | 0   | yes |    |
| at_locus.07937 | 5 | 1,811,921 | 1,812,371 | 25  | 0  | 11  | yes |    |
| at_locus.07938 | 5 | 1,812,797 | 1,813,269 | 20  | 0  | 7   | yes |    |
| at_locus.07939 | 5 | 1,867,652 | 1,867,833 | 0   | 3  | 5   | yes |    |
| at_locus.07940 | 5 | 1,871,127 | 1,871,186 | 7   | 0  | 0   | yes |    |
| at_locus.07941 | 5 | 1,871,556 | 1,871,607 | 7   | 1  | 0   | no  |    |
| at_locus.07942 | 5 | 1,872,016 | 1,872,246 | 21  | 0  | 5   | yes |    |
| at_locus.07943 | 5 | 1,896,800 | 1,897,012 | 13  | 1  | 0   | no  | TE |
| at_locus.07944 | 5 | 1,897,247 | 1,897,387 | 31  | 2  | 1   | no  | TE |
| at_locus.07945 | 5 | 1,897,669 | 1,897,931 | 7   | 2  | 0   | no  | TE |
| at_locus.07946 | 5 | 2,036,586 | 2,037,586 | 6   | 2  | 8   | yes |    |
| at_locus.07947 | 5 | 2,039,894 | 2,040,267 | 5   | 0  | 2   | yes |    |

|                |   |           |           |    |     |     |     |    |
|----------------|---|-----------|-----------|----|-----|-----|-----|----|
| at_locus.07948 | 5 | 2,040,603 | 2,041,608 | 8  | 1   | 4   | yes |    |
| at_locus.07949 | 5 | 2,187,057 | 2,188,235 | 31 | 1   | 5   | yes | TE |
| at_locus.07950 | 5 | 2,188,628 | 2,188,781 | 6  | 0   | 1   | no  | TE |
| at_locus.07951 | 5 | 2,189,046 | 2,189,095 | 6  | 0   | 0   | no  | TE |
| at_locus.07952 | 5 | 2,253,185 | 2,253,308 | 4  | 0   | 0   | yes |    |
| at_locus.07953 | 5 | 2,262,582 | 2,262,785 | 0  | 0   | 5   | yes |    |
| at_locus.07954 | 5 | 2,289,413 | 2,289,704 | 8  | 0   | 1   | yes | TE |
| at_locus.07955 | 5 | 2,346,596 | 2,346,721 | 0  | 0   | 4   | yes |    |
| at_locus.07956 | 5 | 2,347,732 | 2,348,337 | 18 | 0   | 1   | no  | TE |
| at_locus.07957 | 5 | 2,348,564 | 2,348,620 | 5  | 0   | 0   | no  | TE |
| at_locus.07958 | 5 | 2,353,490 | 2,353,620 | 4  | 0   | 0   | yes |    |
| at_locus.07959 | 5 | 2,394,323 | 2,394,818 | 0  | 0   | 2   | no  |    |
| at_locus.07961 | 5 | 2,436,960 | 2,436,979 | 1  | 5   | 0   | yes |    |
| at_locus.07962 | 5 | 2,559,957 | 2,560,096 | 5  | 0   | 0   | yes |    |
| at_locus.07963 | 5 | 2,603,249 | 2,603,322 | 21 | 0   | 2   | no  | TE |
| at_locus.07964 | 5 | 2,603,588 | 2,603,720 | 4  | 0   | 1   | no  | TE |
| at_locus.07965 | 5 | 2,604,138 | 2,605,258 | 30 | 0   | 5   | no  | TE |
| at_locus.07966 | 5 | 2,634,936 | 2,635,020 | 33 | 107 | 61  | yes |    |
| at_locus.07967 | 5 | 2,656,133 | 2,656,200 | 7  | 0   | 0   | yes |    |
| at_locus.07968 | 5 | 2,759,926 | 2,759,946 | 0  | 5   | 0   | yes |    |
| at_locus.07969 | 5 | 2,838,738 | 2,838,760 | 75 | 438 | 189 | yes |    |
| at_locus.07970 | 5 | 2,840,709 | 2,840,730 | 75 | 438 | 188 | no  |    |
| at_locus.07971 | 5 | 2,860,592 | 2,860,625 | 10 | 0   | 0   | no  |    |
| at_locus.07972 | 5 | 2,896,180 | 2,896,228 | 4  | 0   | 0   | yes |    |
| at_locus.07973 | 5 | 2,946,700 | 2,946,721 | 0  | 4   | 0   | yes |    |
| at_locus.07974 | 5 | 2,957,227 | 2,957,654 | 10 | 0   | 0   | yes |    |
| at_locus.07976 | 5 | 3,005,481 | 3,005,499 | 0  | 4   | 0   | no  |    |
| at_locus.07977 | 5 | 3,005,877 | 3,006,321 | 12 | 0   | 0   | yes | TE |
| at_locus.07978 | 5 | 3,006,620 | 3,007,071 | 7  | 0   | 5   | no  | TE |
| at_locus.07979 | 5 | 3,014,957 | 3,015,174 | 1  | 12  | 2   | yes |    |
| at_locus.07980 | 5 | 3,019,107 | 3,019,305 | 10 | 0   | 1   | no  | TE |
| at_locus.07981 | 5 | 3,020,112 | 3,020,197 | 11 | 0   | 0   | no  | TE |
| at_locus.07983 | 5 | 3,111,020 | 3,111,065 | 33 | 156 | 385 | no  |    |
| at_locus.07984 | 5 | 3,114,652 | 3,115,027 | 8  | 0   | 1   | no  | TE |
| at_locus.07985 | 5 | 3,115,297 | 3,115,701 | 5  | 0   | 5   | no  | TE |
| at_locus.07986 | 5 | 3,116,080 | 3,116,201 | 7  | 0   | 1   | no  | TE |
| at_locus.07987 | 5 | 3,116,517 | 3,116,548 | 5  | 0   | 0   | no  | TE |

|                |   |           |           |     |     |     |     |    |
|----------------|---|-----------|-----------|-----|-----|-----|-----|----|
| at_locus.07988 | 5 | 3,161,623 | 3,161,671 | 4   | 0   | 0   | no  |    |
| at_locus.07989 | 5 | 3,161,963 | 3,162,411 | 10  | 0   | 1   | no  | TE |
| at_locus.07990 | 5 | 3,248,281 | 3,248,618 | 1   | 0   | 4   | no  |    |
| at_locus.07991 | 5 | 3,253,037 | 3,253,250 | 5   | 1   | 11  | yes |    |
| at_locus.07992 | 5 | 3,311,086 | 3,311,115 | 7   | 0   | 0   | yes |    |
| at_locus.07994 | 5 | 3,373,008 | 3,373,107 | 14  | 0   | 1   | no  | TE |
| at_locus.07995 | 5 | 3,456,644 | 3,456,734 | 62  | 140 | 30  | yes |    |
| at_locus.07996 | 5 | 3,549,897 | 3,549,987 | 12  | 0   | 0   | no  |    |
| at_locus.07997 | 5 | 3,566,353 | 3,566,423 | 4   | 0   | 0   | yes | TE |
| at_locus.07998 | 5 | 3,566,635 | 3,566,816 | 4   | 0   | 0   | yes | TE |
| at_locus.08000 | 5 | 3,688,523 | 3,688,700 | 9   | 0   | 2   | yes | TE |
| at_locus.08001 | 5 | 3,751,258 | 3,751,857 | 11  | 0   | 12  | yes |    |
| at_locus.08002 | 5 | 3,752,082 | 3,752,819 | 367 | 10  | 260 | yes |    |
| at_locus.08003 | 5 | 3,753,178 | 3,753,802 | 27  | 0   | 6   | yes |    |
| at_locus.08004 | 5 | 3,815,150 | 3,815,330 | 5   | 0   | 0   | yes |    |
| at_locus.08005 | 5 | 3,867,214 | 3,867,234 | 28  | 64  | 11  | no  |    |
| at_locus.08006 | 5 | 3,962,316 | 3,962,339 | 0   | 5   | 0   | yes |    |
| at_locus.08007 | 5 | 4,141,193 | 4,141,454 | 2   | 0   | 11  | yes |    |
| at_locus.08008 | 5 | 4,161,987 | 4,162,307 | 3   | 6   | 13  | no  |    |
| at_locus.08009 | 5 | 4,208,123 | 4,208,815 | 57  | 0   | 2   | no  | TE |
| at_locus.08010 | 5 | 4,210,031 | 4,210,174 | 1   | 0   | 4   | no  | TE |
| at_locus.08011 | 5 | 4,210,656 | 4,211,023 | 6   | 0   | 1   | no  | TE |
| at_locus.08012 | 5 | 4,211,852 | 4,211,897 | 0   | 0   | 6   | no  | TE |
| at_locus.08013 | 5 | 4,211,923 | 4,212,412 | 4   | 0   | 2   | no  | TE |
| at_locus.08014 | 5 | 4,212,662 | 4,213,015 | 54  | 0   | 1   | no  | TE |
| at_locus.08015 | 5 | 4,312,437 | 4,312,514 | 8   | 0   | 0   | no  | TE |
| at_locus.08016 | 5 | 4,313,229 | 4,313,541 | 11  | 0   | 0   | no  | TE |
| at_locus.08017 | 5 | 4,314,047 | 4,314,595 | 13  | 0   | 1   | yes | TE |
| at_locus.08018 | 5 | 4,322,342 | 4,322,908 | 0   | 0   | 6   | yes |    |
| at_locus.08019 | 5 | 4,325,348 | 4,325,584 | 4   | 0   | 0   | no  |    |
| at_locus.08020 | 5 | 4,479,447 | 4,479,544 | 5   | 7   | 7   | yes |    |
| at_locus.08021 | 5 | 4,529,548 | 4,529,971 | 10  | 0   | 1   | yes | TE |
| at_locus.08022 | 5 | 4,641,357 | 4,641,709 | 11  | 0   | 0   | yes |    |
| at_locus.08023 | 5 | 4,690,036 | 4,690,091 | 0   | 2   | 6   | yes |    |
| at_locus.08024 | 5 | 4,691,037 | 4,691,130 | 1   | 4   | 8   | no  |    |
| at_locus.08025 | 5 | 4,694,709 | 4,694,801 | 1   | 4   | 8   | no  |    |
| at_locus.08026 | 5 | 4,776,076 | 4,776,286 | 28  | 2   | 0   | no  |    |

|                |   |           |           |    |   |   |     |    |
|----------------|---|-----------|-----------|----|---|---|-----|----|
| at_locus.08027 | 5 | 4,780,336 | 4,780,650 | 33 | 2 | 0 | no  | TE |
| at_locus.08028 | 5 | 4,780,917 | 4,780,963 | 28 | 0 | 0 | no  | TE |
| at_locus.08029 | 5 | 4,781,229 | 4,781,541 | 10 | 2 | 0 | no  | TE |
| at_locus.08030 | 5 | 4,787,498 | 4,787,811 | 1  | 0 | 5 | yes | TE |
| at_locus.08031 | 5 | 4,800,314 | 4,800,696 | 3  | 0 | 5 | no  | TE |
| at_locus.08032 | 5 | 4,855,789 | 4,856,096 | 6  | 1 | 7 | yes |    |
| at_locus.08033 | 5 | 4,866,320 | 4,866,484 | 1  | 1 | 7 | yes |    |
| at_locus.08034 | 5 | 4,866,727 | 4,866,748 | 1  | 0 | 5 | yes |    |
| at_locus.08036 | 5 | 4,970,290 | 4,970,331 | 4  | 0 | 0 | yes | TE |
| at_locus.08037 | 5 | 4,970,540 | 4,971,022 | 6  | 0 | 1 | no  | TE |
| at_locus.08038 | 5 | 5,008,392 | 5,008,438 | 4  | 0 | 0 | no  |    |
| at_locus.08039 | 5 | 5,062,381 | 5,062,622 | 5  | 0 | 2 | no  | TE |
| at_locus.08040 | 5 | 5,063,528 | 5,063,608 | 10 | 0 | 1 | no  | TE |
| at_locus.08041 | 5 | 5,097,434 | 5,097,802 | 19 | 0 | 1 | yes |    |
| at_locus.08042 | 5 | 5,098,066 | 5,098,159 | 8  | 0 | 2 | no  |    |
| at_locus.08043 | 5 | 5,098,378 | 5,098,520 | 8  | 0 | 0 | no  | TE |
| at_locus.08044 | 5 | 5,111,388 | 5,112,143 | 22 | 0 | 3 | yes | TE |
| at_locus.08045 | 5 | 5,113,697 | 5,113,829 | 4  | 0 | 0 | no  | TE |
| at_locus.08046 | 5 | 5,114,058 | 5,114,759 | 12 | 0 | 2 | yes | TE |
| at_locus.08047 | 5 | 5,128,507 | 5,128,988 | 17 | 0 | 2 | yes | TE |
| at_locus.08048 | 5 | 5,129,608 | 5,129,837 | 7  | 0 | 0 | no  | TE |
| at_locus.08049 | 5 | 5,220,062 | 5,220,139 | 0  | 0 | 4 | yes | TE |
| at_locus.08050 | 5 | 5,288,511 | 5,288,703 | 18 | 0 | 0 | yes |    |
| at_locus.08051 | 5 | 5,427,957 | 5,428,803 | 39 | 2 | 0 | no  | TE |
| at_locus.08052 | 5 | 5,429,033 | 5,429,345 | 12 | 2 | 0 | no  | TE |
| at_locus.08053 | 5 | 5,429,980 | 5,430,019 | 7  | 0 | 0 | no  | TE |
| at_locus.08054 | 5 | 5,461,635 | 5,462,118 | 1  | 4 | 0 | yes |    |
| at_locus.08055 | 5 | 5,625,189 | 5,625,525 | 13 | 0 | 0 | yes | TE |
| at_locus.08056 | 5 | 5,643,957 | 5,644,250 | 7  | 0 | 0 | no  |    |
| at_locus.08057 | 5 | 5,644,886 | 5,645,504 | 8  | 1 | 8 | yes | TE |
| at_locus.08058 | 5 | 5,645,863 | 5,645,889 | 0  | 0 | 4 | no  |    |
| at_locus.08059 | 5 | 5,646,471 | 5,646,530 | 10 | 0 | 0 | yes |    |
| at_locus.08060 | 5 | 5,647,980 | 5,648,148 | 15 | 0 | 0 | yes | TE |
| at_locus.08061 | 5 | 5,674,261 | 5,674,677 | 4  | 1 | 4 | yes |    |
| at_locus.08062 | 5 | 5,749,189 | 5,749,365 | 37 | 0 | 0 | yes |    |
| at_locus.08063 | 5 | 5,792,553 | 5,792,637 | 4  | 0 | 0 | yes |    |
| at_locus.08064 | 5 | 5,801,418 | 5,802,073 | 43 | 0 | 1 | yes |    |

|                |   |           |           |    |   |    |     |    |
|----------------|---|-----------|-----------|----|---|----|-----|----|
| at_locus.08065 | 5 | 5,855,493 | 5,855,785 | 14 | 1 | 27 | yes |    |
| at_locus.08066 | 5 | 5,938,972 | 5,939,045 | 0  | 4 | 0  | yes |    |
| at_locus.08067 | 5 | 5,969,472 | 5,970,499 | 8  | 0 | 8  | no  | TE |
| at_locus.08068 | 5 | 5,976,875 | 5,977,603 | 27 | 0 | 0  | yes | TE |
| at_locus.08069 | 5 | 5,977,833 | 5,978,055 | 12 | 0 | 0  | no  | TE |
| at_locus.08070 | 5 | 6,073,053 | 6,073,289 | 5  | 0 | 1  | yes | TE |
| at_locus.08071 | 5 | 6,206,072 | 6,206,330 | 8  | 0 | 0  | no  |    |
| at_locus.08072 | 5 | 6,206,554 | 6,207,431 | 7  | 1 | 7  | no  | TE |
| at_locus.08073 | 5 | 6,211,989 | 6,212,267 | 0  | 0 | 4  | yes |    |
| at_locus.08074 | 5 | 6,330,934 | 6,330,957 | 0  | 4 | 0  | yes |    |
| at_locus.08075 | 5 | 6,341,824 | 6,341,951 | 14 | 0 | 0  | yes |    |
| at_locus.08076 | 5 | 6,351,273 | 6,351,436 | 6  | 0 | 1  | yes | TE |
| at_locus.08077 | 5 | 6,361,340 | 6,361,379 | 13 | 0 | 0  | yes |    |
| at_locus.08078 | 5 | 6,398,124 | 6,398,393 | 13 | 0 | 1  | yes |    |
| at_locus.08079 | 5 | 6,403,699 | 6,403,944 | 0  | 0 | 4  | yes | TE |
| at_locus.08080 | 5 | 6,419,948 | 6,420,045 | 7  | 0 | 0  | no  | TE |
| at_locus.08081 | 5 | 6,440,234 | 6,440,601 | 29 | 0 | 8  | yes |    |
| at_locus.08082 | 5 | 6,440,975 | 6,441,470 | 85 | 2 | 13 | yes |    |
| at_locus.08083 | 5 | 6,443,949 | 6,443,975 | 4  | 0 | 0  | no  |    |
| at_locus.08084 | 5 | 6,539,382 | 6,539,448 | 4  | 0 | 0  | yes |    |
| at_locus.08085 | 5 | 6,630,780 | 6,631,950 | 19 | 1 | 8  | no  | TE |
| at_locus.08086 | 5 | 6,632,253 | 6,633,810 | 16 | 0 | 3  | no  | TE |
| at_locus.08087 | 5 | 6,634,113 | 6,634,831 | 9  | 0 | 8  | yes | TE |
| at_locus.08088 | 5 | 6,634,850 | 6,635,474 | 18 | 1 | 2  | yes | TE |
| at_locus.08089 | 5 | 6,690,793 | 6,690,824 | 1  | 0 | 0  | no  |    |
| at_locus.08090 | 5 | 6,701,931 | 6,702,140 | 14 | 0 | 0  | no  | TE |
| at_locus.08091 | 5 | 6,702,354 | 6,702,418 | 6  | 0 | 0  | yes | TE |
| at_locus.08092 | 5 | 6,789,389 | 6,789,428 | 5  | 0 | 0  | yes |    |
| at_locus.08093 | 5 | 6,869,388 | 6,869,628 | 13 | 0 | 0  | yes |    |
| at_locus.08094 | 5 | 6,888,454 | 6,888,470 | 1  | 1 | 4  | no  |    |
| at_locus.08095 | 5 | 6,906,729 | 6,906,791 | 4  | 0 | 0  | yes | TE |
| at_locus.08096 | 5 | 6,915,022 | 6,915,728 | 23 | 0 | 9  | yes | TE |
| at_locus.08097 | 5 | 6,926,112 | 6,926,318 | 4  | 0 | 0  | yes | TE |
| at_locus.08098 | 5 | 6,937,551 | 6,937,577 | 8  | 0 | 1  | no  | TE |
| at_locus.08099 | 5 | 6,982,226 | 6,982,438 | 5  | 0 | 0  | yes |    |
| at_locus.08100 | 5 | 7,027,462 | 7,027,689 | 8  | 0 | 1  | yes |    |
| at_locus.08101 | 5 | 7,028,121 | 7,028,383 | 6  | 0 | 6  | yes | TE |



|                |   |           |           |    |     |    |     |    |
|----------------|---|-----------|-----------|----|-----|----|-----|----|
| at_locus.08102 | 5 | 7,031,749 | 7,032,098 | 6  | 0   | 0  | yes |    |
| at_locus.08103 | 5 | 7,037,796 | 7,037,815 | 0  | 0   | 4  | yes |    |
| at_locus.08104 | 5 | 7,038,886 | 7,038,978 | 0  | 0   | 5  | yes |    |
| at_locus.08105 | 5 | 7,042,697 | 7,042,925 | 5  | 0   | 3  | yes | TE |
| at_locus.08106 | 5 | 7,056,228 | 7,056,573 | 8  | 0   | 0  | no  | TE |
| at_locus.08107 | 5 | 7,056,850 | 7,058,130 | 78 | 2   | 19 | yes | TE |
| at_locus.08108 | 5 | 7,070,035 | 7,070,381 | 5  | 0   | 0  | yes | TE |
| at_locus.08109 | 5 | 7,153,409 | 7,153,741 | 8  | 0   | 0  | no  | TE |
| at_locus.08110 | 5 | 7,154,356 | 7,154,658 | 16 | 0   | 1  | no  | TE |
| at_locus.08111 | 5 | 7,185,248 | 7,185,270 | 4  | 0   | 0  | yes | TE |
| at_locus.08112 | 5 | 7,190,399 | 7,190,524 | 7  | 0   | 0  | yes |    |
| at_locus.08113 | 5 | 7,261,303 | 7,261,396 | 4  | 0   | 0  | yes |    |
| at_locus.08114 | 5 | 7,272,726 | 7,272,784 | 4  | 0   | 0  | yes |    |
| at_locus.08115 | 5 | 7,352,483 | 7,352,735 | 4  | 0   | 0  | yes | TE |
| at_locus.08116 | 5 | 7,378,008 | 7,378,208 | 5  | 0   | 0  | yes |    |
| at_locus.08117 | 5 | 7,415,298 | 7,415,645 | 1  | 0   | 5  | yes |    |
| at_locus.08118 | 5 | 7,415,866 | 7,416,047 | 16 | 0   | 5  | yes | TE |
| at_locus.08119 | 5 | 7,417,336 | 7,417,787 | 16 | 1   | 1  | no  | TE |
| at_locus.08120 | 5 | 7,457,457 | 7,457,653 | 17 | 0   | 1  | yes | TE |
| at_locus.08121 | 5 | 7,488,194 | 7,488,310 | 13 | 0   | 0  | no  | TE |
| at_locus.08122 | 5 | 7,488,951 | 7,488,978 | 4  | 0   | 0  | no  | TE |
| at_locus.08123 | 5 | 7,490,972 | 7,491,075 | 4  | 0   | 0  | yes | TE |
| at_locus.08124 | 5 | 7,504,446 | 7,504,477 | 8  | 0   | 0  | no  |    |
| at_locus.08125 | 5 | 7,605,948 | 7,605,996 | 10 | 0   | 0  | yes |    |
| at_locus.08126 | 5 | 7,639,243 | 7,640,081 | 85 | 1   | 80 | yes |    |
| at_locus.08127 | 5 | 7,640,637 | 7,641,260 | 72 | 1   | 3  | yes |    |
| at_locus.08128 | 5 | 7,641,536 | 7,641,603 | 4  | 0   | 0  | yes |    |
| at_locus.08129 | 5 | 7,648,301 | 7,648,355 | 7  | 2   | 0  | yes | TE |
| at_locus.08130 | 5 | 7,648,400 | 7,649,490 | 43 | 2   | 37 | yes | TE |
| at_locus.08131 | 5 | 7,649,764 | 7,649,862 | 7  | 0   | 2  | yes |    |
| at_locus.08132 | 5 | 7,683,792 | 7,684,310 | 20 | 26  | 69 | yes |    |
| at_locus.08133 | 5 | 7,684,561 | 7,685,078 | 18 | 22  | 67 | yes |    |
| at_locus.08134 | 5 | 7,700,643 | 7,700,667 | 4  | 0   | 0  | no  | TE |
| at_locus.08135 | 5 | 7,701,120 | 7,701,182 | 5  | 0   | 0  | no  | TE |
| at_locus.08136 | 5 | 7,711,746 | 7,712,324 | 22 | 2   | 1  | yes | TE |
| at_locus.08137 | 5 | 7,712,725 | 7,713,132 | 20 | 0   | 0  | yes | TE |
| at_locus.08138 | 5 | 7,740,612 | 7,740,699 | 33 | 107 | 61 | yes |    |

|                |   |           |           |     |     |     |     |    |
|----------------|---|-----------|-----------|-----|-----|-----|-----|----|
| at_locus.08139 | 5 | 7,777,192 | 7,777,365 | 7   | 0   | 0   | yes |    |
| at_locus.08140 | 5 | 7,800,734 | 7,800,853 | 5   | 0   | 0   | yes | TE |
| at_locus.08141 | 5 | 7,818,059 | 7,818,235 | 14  | 0   | 0   | no  | TE |
| at_locus.08142 | 5 | 7,824,483 | 7,824,805 | 5   | 0   | 0   | yes |    |
| at_locus.08143 | 5 | 7,833,888 | 7,833,968 | 13  | 0   | 1   | no  | TE |
| at_locus.08144 | 5 | 7,934,912 | 7,935,080 | 5   | 0   | 0   | yes |    |
| at_locus.08145 | 5 | 7,971,829 | 7,972,073 | 8   | 0   | 0   | yes |    |
| at_locus.08146 | 5 | 7,991,246 | 7,991,885 | 21  | 0   | 7   | yes |    |
| at_locus.08147 | 5 | 8,067,875 | 8,067,935 | 4   | 0   | 0   | yes |    |
| at_locus.08148 | 5 | 8,133,599 | 8,133,974 | 9   | 0   | 0   | yes |    |
| at_locus.08149 | 5 | 8,160,913 | 8,160,971 | 6   | 0   | 0   | yes |    |
| at_locus.08150 | 5 | 8,177,807 | 8,178,160 | 8   | 0   | 3   | yes |    |
| at_locus.08151 | 5 | 8,187,274 | 8,187,449 | 4   | 0   | 0   | yes |    |
| at_locus.08152 | 5 | 8,204,045 | 8,204,403 | 7   | 0   | 7   | yes |    |
| at_locus.08153 | 5 | 8,280,723 | 8,280,769 | 7   | 0   | 0   | no  | TE |
| at_locus.08154 | 5 | 8,281,342 | 8,281,414 | 4   | 0   | 0   | yes | TE |
| at_locus.08155 | 5 | 8,290,653 | 8,290,804 | 7   | 0   | 0   | yes | TE |
| at_locus.08156 | 5 | 8,313,241 | 8,314,148 | 26  | 1   | 4   | no  | TE |
| at_locus.08157 | 5 | 8,353,322 | 8,353,460 | 44  | 3   | 0   | no  | TE |
| at_locus.08158 | 5 | 8,353,886 | 8,354,338 | 17  | 0   | 0   | no  | TE |
| at_locus.08159 | 5 | 8,368,960 | 8,369,104 | 14  | 0   | 1   | no  | TE |
| at_locus.08160 | 5 | 8,398,119 | 8,398,395 | 17  | 0   | 0   | yes | TE |
| at_locus.08161 | 5 | 8,404,491 | 8,404,610 | 6   | 0   | 0   | yes | TE |
| at_locus.08162 | 5 | 8,404,908 | 8,405,019 | 6   | 0   | 0   | no  | TE |
| at_locus.08163 | 5 | 8,419,476 | 8,420,001 | 20  | 0   | 8   | yes |    |
| at_locus.08164 | 5 | 8,439,964 | 8,440,024 | 6   | 0   | 0   | yes |    |
| at_locus.08165 | 5 | 8,446,251 | 8,446,463 | 18  | 0   | 0   | yes | TE |
| at_locus.08166 | 5 | 8,452,584 | 8,453,104 | 8   | 0   | 8   | yes |    |
| at_locus.08167 | 5 | 8,501,522 | 8,501,678 | 4   | 1   | 0   | no  |    |
| at_locus.08168 | 5 | 8,503,853 | 8,503,924 | 0   | 0   | 8   | yes | TE |
| at_locus.08169 | 5 | 8,506,215 | 8,506,373 | 5   | 0   | 0   | yes |    |
| at_locus.08170 | 5 | 8,507,829 | 8,508,231 | 2   | 7   | 2   | yes |    |
| at_locus.08171 | 5 | 8,508,552 | 8,508,708 | 4   | 1   | 0   | no  |    |
| at_locus.08172 | 5 | 8,527,511 | 8,527,535 | 114 | 197 | 125 | yes |    |
| at_locus.08173 | 5 | 8,538,584 | 8,538,841 | 5   | 1   | 1   | yes |    |
| at_locus.08174 | 5 | 8,549,560 | 8,549,901 | 14  | 0   | 1   | yes | TE |
| at_locus.08175 | 5 | 8,550,520 | 8,551,130 | 4   | 0   | 4   | no  | TE |

|                |   |           |           |    |   |    |     |    |
|----------------|---|-----------|-----------|----|---|----|-----|----|
| at_locus.08176 | 5 | 8,572,960 | 8,573,176 | 0  | 0 | 5  | yes |    |
| at_locus.08177 | 5 | 8,575,651 | 8,575,751 | 4  | 0 | 1  | yes | TE |
| at_locus.08178 | 5 | 8,588,903 | 8,589,081 | 7  | 0 | 0  | yes |    |
| at_locus.08179 | 5 | 8,594,173 | 8,594,352 | 6  | 1 | 0  | yes | TE |
| at_locus.08180 | 5 | 8,601,820 | 8,602,035 | 8  | 0 | 0  | no  | TE |
| at_locus.08181 | 5 | 8,611,699 | 8,611,734 | 14 | 0 | 0  | yes | TE |
| at_locus.08182 | 5 | 8,613,990 | 8,614,664 | 22 | 0 | 10 | yes |    |
| at_locus.08183 | 5 | 8,617,718 | 8,617,802 | 4  | 0 | 1  | yes |    |
| at_locus.08184 | 5 | 8,624,537 | 8,624,809 | 31 | 0 | 0  | no  | TE |
| at_locus.08185 | 5 | 8,625,106 | 8,625,416 | 1  | 0 | 5  | no  | TE |
| at_locus.08186 | 5 | 8,625,808 | 8,626,313 | 2  | 0 | 5  | no  | TE |
| at_locus.08187 | 5 | 8,627,667 | 8,627,836 | 5  | 0 | 0  | no  | TE |
| at_locus.08188 | 5 | 8,628,799 | 8,629,221 | 1  | 0 | 5  | yes | TE |
| at_locus.08189 | 5 | 8,629,227 | 8,629,336 | 30 | 0 | 0  | no  | TE |
| at_locus.08190 | 5 | 8,675,323 | 8,676,377 | 16 | 0 | 10 | yes | TE |
| at_locus.08191 | 5 | 8,683,593 | 8,684,253 | 13 | 2 | 0  | yes | TE |
| at_locus.08192 | 5 | 8,684,563 | 8,684,626 | 18 | 0 | 1  | yes | TE |
| at_locus.08193 | 5 | 8,684,846 | 8,685,095 | 5  | 0 | 0  | yes |    |
| at_locus.08194 | 5 | 8,702,929 | 8,703,503 | 20 | 0 | 23 | yes | TE |
| at_locus.08195 | 5 | 8,716,060 | 8,716,175 | 4  | 1 | 0  | yes |    |
| at_locus.08196 | 5 | 8,716,503 | 8,716,575 | 4  | 0 | 0  | yes |    |
| at_locus.08197 | 5 | 8,721,521 | 8,722,878 | 17 | 1 | 8  | yes | TE |
| at_locus.08198 | 5 | 8,723,343 | 8,723,571 | 9  | 0 | 0  | yes |    |
| at_locus.08199 | 5 | 8,728,316 | 8,728,468 | 6  | 0 | 4  | yes |    |
| at_locus.08200 | 5 | 8,744,630 | 8,745,422 | 48 | 3 | 1  | yes | TE |
| at_locus.08201 | 5 | 8,745,689 | 8,746,010 | 11 | 0 | 0  | no  | TE |
| at_locus.08202 | 5 | 8,746,619 | 8,746,704 | 16 | 0 | 0  | no  | TE |
| at_locus.08203 | 5 | 8,748,936 | 8,749,466 | 20 | 0 | 0  | yes | TE |
| at_locus.08204 | 5 | 8,766,017 | 8,766,708 | 11 | 2 | 3  | yes | TE |
| at_locus.08205 | 5 | 8,766,963 | 8,767,211 | 35 | 2 | 1  | no  | TE |
| at_locus.08206 | 5 | 8,769,448 | 8,769,633 | 47 | 1 | 2  | yes | TE |
| at_locus.08207 | 5 | 8,770,519 | 8,770,644 | 16 | 0 | 0  | no  | TE |
| at_locus.08208 | 5 | 8,783,352 | 8,783,728 | 11 | 0 | 7  | yes | TE |
| at_locus.08209 | 5 | 8,810,475 | 8,811,344 | 48 | 1 | 47 | yes |    |
| at_locus.08210 | 5 | 8,811,759 | 8,812,245 | 41 | 0 | 58 | yes |    |
| at_locus.08211 | 5 | 8,813,069 | 8,813,482 | 23 | 0 | 21 | yes |    |
| at_locus.08212 | 5 | 8,824,483 | 8,824,670 | 11 | 0 | 0  | yes |    |

|                |   |           |           |     |    |     |     |    |
|----------------|---|-----------|-----------|-----|----|-----|-----|----|
| at_locus.08213 | 5 | 8,825,154 | 8,826,268 | 312 | 2  | 233 | yes |    |
| at_locus.08214 | 5 | 8,827,283 | 8,827,511 | 4   | 0  | 1   | yes | TE |
| at_locus.08215 | 5 | 8,827,733 | 8,828,290 | 9   | 0  | 2   | yes | TE |
| at_locus.08216 | 5 | 8,860,716 | 8,860,957 | 20  | 1  | 0   | yes | TE |
| at_locus.08217 | 5 | 8,873,047 | 8,873,340 | 5   | 0  | 0   | yes |    |
| at_locus.08218 | 5 | 8,893,319 | 8,893,381 | 10  | 0  | 0   | yes |    |
| at_locus.08219 | 5 | 8,896,668 | 8,896,810 | 7   | 0  | 0   | no  | TE |
| at_locus.08220 | 5 | 8,897,026 | 8,897,119 | 8   | 0  | 2   | no  |    |
| at_locus.08221 | 5 | 8,897,383 | 8,897,695 | 23  | 0  | 1   | yes |    |
| at_locus.08222 | 5 | 8,919,027 | 8,919,274 | 9   | 0  | 0   | yes |    |
| at_locus.08223 | 5 | 8,927,913 | 8,928,290 | 40  | 0  | 0   | yes | TE |
| at_locus.08224 | 5 | 8,931,500 | 8,931,766 | 2   | 0  | 6   | no  | TE |
| at_locus.08225 | 5 | 8,934,016 | 8,934,285 | 39  | 0  | 0   | no  | TE |
| at_locus.08227 | 5 | 8,958,230 | 8,958,741 | 0   | 11 | 3   | yes |    |
| at_locus.08228 | 5 | 8,962,195 | 8,962,435 | 0   | 4  | 0   | yes |    |
| at_locus.08229 | 5 | 8,972,807 | 8,972,968 | 2   | 5  | 4   | yes |    |
| at_locus.08230 | 5 | 9,020,399 | 9,020,440 | 6   | 0  | 0   | yes | TE |
| at_locus.08231 | 5 | 9,021,335 | 9,021,450 | 4   | 0  | 0   | no  | TE |
| at_locus.08232 | 5 | 9,021,947 | 9,022,254 | 13  | 0  | 6   | no  | TE |
| at_locus.08233 | 5 | 9,048,843 | 9,048,874 | 5   | 0  | 0   | no  | TE |
| at_locus.08234 | 5 | 9,068,274 | 9,068,389 | 13  | 0  | 0   | no  | TE |
| at_locus.08235 | 5 | 9,069,321 | 9,070,659 | 80  | 0  | 24  | no  | TE |
| at_locus.08236 | 5 | 9,096,092 | 9,096,115 | 4   | 0  | 0   | yes |    |
| at_locus.08237 | 5 | 9,098,814 | 9,098,901 | 2   | 4  | 0   | yes |    |
| at_locus.08238 | 5 | 9,113,795 | 9,114,068 | 29  | 0  | 5   | yes |    |
| at_locus.08239 | 5 | 9,114,789 | 9,115,119 | 28  | 1  | 2   | yes |    |
| at_locus.08240 | 5 | 9,133,964 | 9,134,153 | 9   | 0  | 0   | no  | TE |
| at_locus.08241 | 5 | 9,134,439 | 9,134,620 | 5   | 0  | 0   | yes | TE |
| at_locus.08242 | 5 | 9,136,129 | 9,136,149 | 28  | 64 | 11  | no  |    |
| at_locus.08243 | 5 | 9,155,919 | 9,156,356 | 14  | 0  | 0   | yes | TE |
| at_locus.08244 | 5 | 9,169,399 | 9,169,540 | 4   | 0  | 3   | yes |    |
| at_locus.08245 | 5 | 9,181,822 | 9,189,262 | 156 | 5  | 163 | yes | TE |
| at_locus.08246 | 5 | 9,203,264 | 9,203,527 | 4   | 0  | 0   | yes |    |
| at_locus.08247 | 5 | 9,226,834 | 9,226,882 | 5   | 0  | 0   | yes |    |
| at_locus.08248 | 5 | 9,237,629 | 9,237,652 | 4   | 0  | 0   | yes |    |
| at_locus.08249 | 5 | 9,259,326 | 9,259,355 | 4   | 0  | 0   | yes | TE |
| at_locus.08250 | 5 | 9,275,568 | 9,275,723 | 5   | 0  | 1   | yes | TE |

|                |   |           |           |    |   |    |     |    |
|----------------|---|-----------|-----------|----|---|----|-----|----|
| at_locus.08251 | 5 | 9,280,512 | 9,280,710 | 6  | 0 | 0  | yes |    |
| at_locus.08252 | 5 | 9,282,152 | 9,282,243 | 4  | 0 | 0  | no  |    |
| at_locus.08253 | 5 | 9,290,294 | 9,290,771 | 6  | 0 | 6  | yes |    |
| at_locus.08254 | 5 | 9,321,443 | 9,321,658 | 18 | 0 | 7  | yes | TE |
| at_locus.08255 | 5 | 9,321,780 | 9,322,522 | 9  | 0 | 11 | yes | TE |
| at_locus.08256 | 5 | 9,323,725 | 9,323,861 | 4  | 0 | 0  | yes |    |
| at_locus.08257 | 5 | 9,324,226 | 9,324,806 | 14 | 1 | 14 | yes |    |
| at_locus.08258 | 5 | 9,340,072 | 9,340,293 | 7  | 0 | 0  | no  | TE |
| at_locus.08259 | 5 | 9,340,913 | 9,341,140 | 32 | 0 | 1  | yes | TE |
| at_locus.08260 | 5 | 9,343,632 | 9,344,395 | 28 | 0 | 11 | yes |    |
| at_locus.08261 | 5 | 9,346,556 | 9,346,835 | 9  | 0 | 1  | yes |    |
| at_locus.08262 | 5 | 9,357,741 | 9,357,917 | 10 | 0 | 0  | yes |    |
| at_locus.08263 | 5 | 9,381,716 | 9,382,287 | 48 | 3 | 14 | no  | TE |
| at_locus.08264 | 5 | 9,382,376 | 9,382,698 | 4  | 0 | 4  | yes | TE |
| at_locus.08265 | 5 | 9,383,069 | 9,384,633 | 36 | 0 | 7  | no  | TE |
| at_locus.08266 | 5 | 9,384,965 | 9,385,482 | 11 | 1 | 4  | no  | TE |
| at_locus.08267 | 5 | 9,386,358 | 9,386,627 | 44 | 5 | 5  | yes | TE |
| at_locus.08268 | 5 | 9,394,222 | 9,394,339 | 4  | 0 | 0  | yes |    |
| at_locus.08269 | 5 | 9,396,288 | 9,396,436 | 5  | 0 | 2  | no  | TE |
| at_locus.08270 | 5 | 9,414,177 | 9,414,201 | 4  | 0 | 0  | yes | TE |
| at_locus.08271 | 5 | 9,428,599 | 9,428,869 | 13 | 0 | 4  | yes |    |
| at_locus.08272 | 5 | 9,444,240 | 9,444,748 | 13 | 1 | 7  | yes |    |
| at_locus.08273 | 5 | 9,462,543 | 9,462,972 | 9  | 0 | 3  | no  | TE |
| at_locus.08274 | 5 | 9,487,404 | 9,487,648 | 4  | 0 | 0  | yes |    |
| at_locus.08275 | 5 | 9,545,137 | 9,545,421 | 9  | 0 | 0  | yes |    |
| at_locus.08276 | 5 | 9,545,882 | 9,546,238 | 5  | 0 | 1  | no  | TE |
| at_locus.08277 | 5 | 9,552,636 | 9,552,960 | 8  | 0 | 0  | yes | TE |
| at_locus.08278 | 5 | 9,557,664 | 9,558,783 | 36 | 0 | 1  | yes | TE |
| at_locus.08279 | 5 | 9,559,425 | 9,559,510 | 16 | 0 | 0  | no  | TE |
| at_locus.08280 | 5 | 9,561,721 | 9,561,768 | 7  | 0 | 0  | yes |    |
| at_locus.08281 | 5 | 9,563,216 | 9,563,584 | 7  | 1 | 1  | no  | TE |
| at_locus.08282 | 5 | 9,563,829 | 9,564,058 | 7  | 0 | 11 | yes | TE |
| at_locus.08283 | 5 | 9,564,626 | 9,564,954 | 1  | 0 | 4  | no  | TE |
| at_locus.08284 | 5 | 9,565,654 | 9,565,954 | 1  | 0 | 16 | no  | TE |
| at_locus.08285 | 5 | 9,567,071 | 9,568,491 | 6  | 0 | 34 | yes | TE |
| at_locus.08286 | 5 | 9,569,057 | 9,569,219 | 1  | 0 | 4  | no  | TE |
| at_locus.08287 | 5 | 9,569,454 | 9,569,891 | 2  | 0 | 8  | no  | TE |

|                |   |           |           |     |   |     |     |    |
|----------------|---|-----------|-----------|-----|---|-----|-----|----|
| at_locus.08288 | 5 | 9,570,570 | 9,570,974 | 0   | 0 | 7   | no  | TE |
| at_locus.08289 | 5 | 9,574,713 | 9,574,959 | 4   | 0 | 0   | no  | TE |
| at_locus.08290 | 5 | 9,590,413 | 9,590,498 | 16  | 0 | 0   | no  | TE |
| at_locus.08291 | 5 | 9,590,947 | 9,591,417 | 12  | 2 | 0   | yes | TE |
| at_locus.08292 | 5 | 9,591,668 | 9,592,362 | 36  | 2 | 2   | no  | TE |
| at_locus.08293 | 5 | 9,604,598 | 9,604,821 | 2   | 0 | 5   | no  |    |
| at_locus.08294 | 5 | 9,612,225 | 9,612,408 | 14  | 0 | 10  | yes |    |
| at_locus.08295 | 5 | 9,612,641 | 9,612,670 | 4   | 0 | 0   | no  | TE |
| at_locus.08296 | 5 | 9,616,271 | 9,616,686 | 5   | 0 | 2   | yes | TE |
| at_locus.08297 | 5 | 9,616,920 | 9,616,970 | 9   | 0 | 0   | yes | TE |
| at_locus.08298 | 5 | 9,632,172 | 9,632,684 | 22  | 1 | 1   | yes |    |
| at_locus.08299 | 5 | 9,637,178 | 9,637,273 | 4   | 0 | 4   | yes |    |
| at_locus.08300 | 5 | 9,639,041 | 9,639,177 | 22  | 0 | 0   | no  | TE |
| at_locus.08301 | 5 | 9,639,409 | 9,640,037 | 14  | 0 | 1   | no  | TE |
| at_locus.08302 | 5 | 9,644,527 | 9,644,717 | 9   | 1 | 0   | yes | TE |
| at_locus.08303 | 5 | 9,664,942 | 9,665,072 | 4   | 0 | 0   | no  | TE |
| at_locus.08304 | 5 | 9,686,250 | 9,686,381 | 4   | 0 | 0   | yes |    |
| at_locus.08305 | 5 | 9,709,538 | 9,709,892 | 7   | 1 | 1   | no  | TE |
| at_locus.08306 | 5 | 9,710,467 | 9,710,921 | 7   | 1 | 5   | yes | TE |
| at_locus.08307 | 5 | 9,721,948 | 9,722,086 | 6   | 0 | 1   | yes | TE |
| at_locus.08308 | 5 | 9,738,751 | 9,740,442 | 30  | 1 | 16  | yes | TE |
| at_locus.08309 | 5 | 9,741,739 | 9,741,863 | 4   | 0 | 0   | yes | TE |
| at_locus.08310 | 5 | 9,750,863 | 9,751,659 | 38  | 0 | 19  | yes | TE |
| at_locus.08311 | 5 | 9,751,902 | 9,753,941 | 99  | 2 | 42  | yes | TE |
| at_locus.08312 | 5 | 9,754,301 | 9,754,546 | 4   | 0 | 1   | no  | TE |
| at_locus.08313 | 5 | 9,755,896 | 9,756,589 | 17  | 0 | 1   | yes |    |
| at_locus.08314 | 5 | 9,756,844 | 9,756,918 | 6   | 0 | 1   | no  |    |
| at_locus.08315 | 5 | 9,758,309 | 9,758,402 | 0   | 0 | 4   | yes | TE |
| at_locus.08316 | 5 | 9,763,037 | 9,763,123 | 15  | 0 | 0   | yes | TE |
| at_locus.08317 | 5 | 9,770,617 | 9,770,646 | 4   | 0 | 0   | no  | TE |
| at_locus.08318 | 5 | 9,789,487 | 9,789,616 | 1   | 6 | 0   | yes |    |
| at_locus.08319 | 5 | 9,800,145 | 9,800,273 | 5   | 0 | 3   | yes |    |
| at_locus.08320 | 5 | 9,800,512 | 9,801,462 | 209 | 4 | 172 | yes |    |
| at_locus.08321 | 5 | 9,802,053 | 9,802,359 | 1   | 0 | 4   | yes | TE |
| at_locus.08322 | 5 | 9,832,579 | 9,832,633 | 0   | 0 | 4   | no  |    |
| at_locus.08323 | 5 | 9,832,709 | 9,832,740 | 2   | 4 | 0   | no  |    |
| at_locus.08324 | 5 | 9,840,884 | 9,841,320 | 15  | 0 | 13  | yes |    |

|                |   |            |            |    |    |    |     |    |
|----------------|---|------------|------------|----|----|----|-----|----|
| at_locus.08325 | 5 | 9,849,350  | 9,849,513  | 5  | 0  | 0  | yes |    |
| at_locus.08326 | 5 | 9,852,688  | 9,852,708  | 4  | 38 | 12 | yes |    |
| at_locus.08327 | 5 | 9,854,350  | 9,854,777  | 10 | 0  | 0  | no  | TE |
| at_locus.08328 | 5 | 9,866,847  | 9,866,874  | 4  | 0  | 0  | no  | TE |
| at_locus.08329 | 5 | 9,867,568  | 9,867,637  | 16 | 0  | 0  | no  | TE |
| at_locus.08330 | 5 | 9,872,448  | 9,872,810  | 26 | 0  | 1  | yes |    |
| at_locus.08331 | 5 | 9,877,718  | 9,877,929  | 19 | 0  | 0  | yes |    |
| at_locus.08332 | 5 | 9,888,940  | 9,889,032  | 4  | 0  | 0  | yes | TE |
| at_locus.08333 | 5 | 9,890,388  | 9,890,671  | 4  | 0  | 0  | no  | TE |
| at_locus.08334 | 5 | 9,891,345  | 9,891,557  | 5  | 0  | 0  | no  | TE |
| at_locus.08335 | 5 | 9,891,686  | 9,893,407  | 17 | 0  | 21 | yes | TE |
| at_locus.08336 | 5 | 9,893,785  | 9,894,482  | 10 | 0  | 17 | yes | TE |
| at_locus.08337 | 5 | 9,894,817  | 9,895,234  | 7  | 0  | 10 | yes | TE |
| at_locus.08338 | 5 | 9,895,595  | 9,895,820  | 0  | 0  | 5  | no  | TE |
| at_locus.08339 | 5 | 9,895,962  | 9,896,891  | 11 | 0  | 28 | yes | TE |
| at_locus.08340 | 5 | 9,897,108  | 9,897,175  | 26 | 0  | 4  | no  | TE |
| at_locus.08341 | 5 | 9,930,940  | 9,931,112  | 31 | 2  | 2  | no  | TE |
| at_locus.08342 | 5 | 9,931,973  | 9,932,144  | 25 | 1  | 1  | yes | TE |
| at_locus.08343 | 5 | 9,940,073  | 9,940,145  | 13 | 1  | 2  | yes |    |
| at_locus.08344 | 5 | 9,963,073  | 9,963,386  | 31 | 2  | 0  | no  | TE |
| at_locus.08345 | 5 | 9,963,621  | 9,964,329  | 45 | 4  | 1  | no  | TE |
| at_locus.08346 | 5 | 9,964,936  | 9,965,021  | 16 | 0  | 0  | no  | TE |
| at_locus.08347 | 5 | 9,972,018  | 9,972,514  | 11 | 0  | 14 | yes |    |
| at_locus.08348 | 5 | 9,979,103  | 9,979,177  | 14 | 0  | 0  | no  | TE |
| at_locus.08349 | 5 | 9,980,986  | 9,981,391  | 0  | 0  | 5  | yes | TE |
| at_locus.08350 | 5 | 9,981,534  | 9,981,722  | 4  | 0  | 0  | yes | TE |
| at_locus.08351 | 5 | 9,983,717  | 9,983,794  | 8  | 0  | 0  | no  |    |
| at_locus.08352 | 5 | 9,988,115  | 9,988,257  | 7  | 0  | 0  | yes | TE |
| at_locus.08353 | 5 | 9,992,400  | 9,992,666  | 6  | 0  | 5  | yes |    |
| at_locus.08354 | 5 | 9,993,731  | 9,993,897  | 3  | 0  | 1  | no  | TE |
| at_locus.08355 | 5 | 9,998,258  | 9,998,283  | 4  | 0  | 0  | no  | TE |
| at_locus.08356 | 5 | 10,019,321 | 10,019,527 | 7  | 0  | 2  | yes | TE |
| at_locus.08357 | 5 | 10,025,825 | 10,025,941 | 20 | 1  | 1  | yes | TE |
| at_locus.08358 | 5 | 10,041,818 | 10,042,364 | 27 | 0  | 0  | no  | TE |
| at_locus.08359 | 5 | 10,052,319 | 10,052,460 | 1  | 0  | 4  | yes | TE |
| at_locus.08360 | 5 | 10,058,394 | 10,058,493 | 4  | 0  | 1  | yes | TE |
| at_locus.08361 | 5 | 10,065,414 | 10,065,724 | 10 | 0  | 3  | yes |    |

|                |   |            |            |    |   |    |     |    |
|----------------|---|------------|------------|----|---|----|-----|----|
| at_locus.08362 | 5 | 10,067,428 | 10,068,620 | 29 | 1 | 13 | yes |    |
| at_locus.08363 | 5 | 10,073,221 | 10,073,489 | 9  | 0 | 5  | yes |    |
| at_locus.08364 | 5 | 10,073,689 | 10,074,978 | 47 | 0 | 37 | yes | TE |
| at_locus.08365 | 5 | 10,076,240 | 10,076,307 | 0  | 0 | 7  | yes |    |
| at_locus.08366 | 5 | 10,084,209 | 10,084,412 | 6  | 0 | 0  | no  |    |
| at_locus.08367 | 5 | 10,088,129 | 10,088,301 | 4  | 0 | 3  | no  | TE |
| at_locus.08368 | 5 | 10,099,748 | 10,099,963 | 6  | 0 | 0  | yes |    |
| at_locus.08369 | 5 | 10,106,720 | 10,107,801 | 16 | 1 | 14 | yes | TE |
| at_locus.08370 | 5 | 10,108,293 | 10,108,440 | 2  | 0 | 5  | no  | TE |
| at_locus.08371 | 5 | 10,109,498 | 10,110,863 | 26 | 1 | 22 | no  | TE |
| at_locus.08372 | 5 | 10,111,355 | 10,111,502 | 2  | 0 | 5  | no  | TE |
| at_locus.08373 | 5 | 10,112,560 | 10,113,925 | 30 | 1 | 23 | no  | TE |
| at_locus.08374 | 5 | 10,114,417 | 10,114,525 | 2  | 0 | 4  | no  | TE |
| at_locus.08375 | 5 | 10,119,633 | 10,119,813 | 8  | 0 | 0  | yes | TE |
| at_locus.08376 | 5 | 10,122,636 | 10,122,745 | 4  | 1 | 1  | yes | TE |
| at_locus.08377 | 5 | 10,125,335 | 10,126,010 | 12 | 0 | 19 | yes | TE |
| at_locus.08378 | 5 | 10,126,844 | 10,126,867 | 5  | 0 | 0  | no  |    |
| at_locus.08379 | 5 | 10,127,012 | 10,127,090 | 0  | 0 | 4  | yes |    |
| at_locus.08380 | 5 | 10,142,006 | 10,142,277 | 0  | 0 | 4  | no  | TE |
| at_locus.08381 | 5 | 10,143,548 | 10,143,840 | 0  | 0 | 4  | yes | TE |
| at_locus.08382 | 5 | 10,152,441 | 10,152,478 | 4  | 0 | 0  | yes |    |
| at_locus.08383 | 5 | 10,153,036 | 10,153,334 | 4  | 0 | 2  | no  | TE |
| at_locus.08384 | 5 | 10,158,054 | 10,158,643 | 13 | 1 | 12 | no  | TE |
| at_locus.08385 | 5 | 10,159,842 | 10,160,253 | 8  | 0 | 1  | no  | TE |
| at_locus.08386 | 5 | 10,160,797 | 10,160,912 | 6  | 0 | 3  | yes | TE |
| at_locus.08387 | 5 | 10,165,076 | 10,165,194 | 15 | 1 | 0  | yes | TE |
| at_locus.08388 | 5 | 10,172,748 | 10,173,169 | 7  | 0 | 14 | yes |    |
| at_locus.08389 | 5 | 10,173,754 | 10,174,123 | 7  | 0 | 1  | yes |    |
| at_locus.08390 | 5 | 10,175,364 | 10,175,574 | 41 | 0 | 16 | yes |    |
| at_locus.08391 | 5 | 10,178,714 | 10,178,986 | 1  | 0 | 7  | yes | TE |
| at_locus.08392 | 5 | 10,179,189 | 10,179,356 | 7  | 0 | 14 | yes |    |
| at_locus.08393 | 5 | 10,180,127 | 10,180,580 | 3  | 0 | 10 | yes | TE |
| at_locus.08394 | 5 | 10,187,523 | 10,187,998 | 14 | 0 | 1  | no  | TE |
| at_locus.08395 | 5 | 10,197,306 | 10,197,952 | 9  | 0 | 12 | no  | TE |
| at_locus.08396 | 5 | 10,198,161 | 10,199,033 | 20 | 0 | 6  | yes | TE |
| at_locus.08397 | 5 | 10,205,712 | 10,206,053 | 6  | 0 | 10 | yes | TE |
| at_locus.08398 | 5 | 10,210,216 | 10,210,285 | 7  | 0 | 0  | no  | TE |



|                |   |            |            |    |   |    |     |    |
|----------------|---|------------|------------|----|---|----|-----|----|
| at_locus.08399 | 5 | 10,210,533 | 10,210,665 | 4  | 0 | 1  | no  | TE |
| at_locus.08400 | 5 | 10,211,494 | 10,211,821 | 12 | 0 | 0  | no  | TE |
| at_locus.08401 | 5 | 10,214,479 | 10,214,628 | 6  | 1 | 0  | yes |    |
| at_locus.08402 | 5 | 10,221,215 | 10,221,863 | 1  | 0 | 3  | yes |    |
| at_locus.08403 | 5 | 10,240,502 | 10,240,531 | 5  | 0 | 0  | yes |    |
| at_locus.08404 | 5 | 10,241,326 | 10,241,838 | 16 | 0 | 13 | no  | TE |
| at_locus.08405 | 5 | 10,242,705 | 10,242,993 | 4  | 0 | 8  | yes | TE |
| at_locus.08406 | 5 | 10,243,226 | 10,244,622 | 23 | 0 | 27 | no  | TE |
| at_locus.08407 | 5 | 10,244,936 | 10,245,185 | 4  | 0 | 6  | no  | TE |
| at_locus.08408 | 5 | 10,245,418 | 10,245,849 | 6  | 0 | 12 | no  | TE |
| at_locus.08409 | 5 | 10,246,029 | 10,247,415 | 29 | 2 | 24 | no  | TE |
| at_locus.08410 | 5 | 10,247,729 | 10,247,978 | 4  | 0 | 6  | no  | TE |
| at_locus.08411 | 5 | 10,248,211 | 10,248,642 | 14 | 0 | 16 | no  | TE |
| at_locus.08412 | 5 | 10,248,822 | 10,250,208 | 29 | 2 | 24 | no  | TE |
| at_locus.08413 | 5 | 10,250,522 | 10,250,771 | 4  | 0 | 6  | no  | TE |
| at_locus.08414 | 5 | 10,251,004 | 10,251,435 | 14 | 0 | 16 | no  | TE |
| at_locus.08415 | 5 | 10,251,615 | 10,253,001 | 29 | 2 | 23 | no  | TE |
| at_locus.08416 | 5 | 10,253,315 | 10,253,564 | 4  | 0 | 6  | no  | TE |
| at_locus.08417 | 5 | 10,253,797 | 10,255,192 | 23 | 0 | 28 | no  | TE |
| at_locus.08418 | 5 | 10,256,241 | 10,256,519 | 0  | 0 | 6  | no  | TE |
| at_locus.08419 | 5 | 10,269,668 | 10,269,696 | 4  | 0 | 0  | no  | TE |
| at_locus.08420 | 5 | 10,270,446 | 10,270,524 | 9  | 0 | 1  | no  | TE |
| at_locus.08421 | 5 | 10,271,000 | 10,271,032 | 4  | 0 | 0  | no  | TE |
| at_locus.08422 | 5 | 10,284,172 | 10,284,202 | 4  | 0 | 0  | yes |    |
| at_locus.08423 | 5 | 10,290,965 | 10,291,691 | 3  | 0 | 9  | yes |    |
| at_locus.08424 | 5 | 10,317,233 | 10,317,832 | 3  | 0 | 10 | no  | TE |
| at_locus.08425 | 5 | 10,330,763 | 10,330,996 | 7  | 0 | 7  | no  | TE |
| at_locus.08426 | 5 | 10,338,061 | 10,338,658 | 3  | 0 | 11 | no  | TE |
| at_locus.08427 | 5 | 10,350,447 | 10,350,638 | 6  | 0 | 0  | yes | TE |
| at_locus.08428 | 5 | 10,354,994 | 10,355,193 | 0  | 0 | 4  | yes | TE |
| at_locus.08429 | 5 | 10,358,182 | 10,358,440 | 0  | 0 | 4  | yes |    |
| at_locus.08430 | 5 | 10,369,960 | 10,370,012 | 5  | 0 | 0  | no  | TE |
| at_locus.08431 | 5 | 10,370,378 | 10,370,451 | 4  | 0 | 0  | yes | TE |
| at_locus.08432 | 5 | 10,370,920 | 10,370,958 | 4  | 0 | 0  | no  |    |
| at_locus.08433 | 5 | 10,372,531 | 10,372,703 | 11 | 0 | 9  | yes |    |
| at_locus.08434 | 5 | 10,373,154 | 10,373,496 | 4  | 0 | 6  | yes | TE |
| at_locus.08435 | 5 | 10,378,734 | 10,379,166 | 3  | 0 | 7  | no  | TE |

|                |   |            |            |    |   |    |     |    |
|----------------|---|------------|------------|----|---|----|-----|----|
| at_locus.08436 | 5 | 10,385,124 | 10,385,394 | 9  | 0 | 3  | yes |    |
| at_locus.08437 | 5 | 10,394,261 | 10,394,422 | 10 | 1 | 1  | no  | TE |
| at_locus.08438 | 5 | 10,397,291 | 10,397,317 | 4  | 0 | 1  | yes |    |
| at_locus.08439 | 5 | 10,400,737 | 10,401,724 | 63 | 4 | 22 | no  | TE |
| at_locus.08440 | 5 | 10,402,013 | 10,403,748 | 59 | 0 | 22 | no  | TE |
| at_locus.08441 | 5 | 10,403,976 | 10,404,492 | 19 | 1 | 11 | no  | TE |
| at_locus.08442 | 5 | 10,405,131 | 10,405,880 | 63 | 4 | 9  | no  | TE |
| at_locus.08443 | 5 | 10,417,994 | 10,418,255 | 8  | 0 | 1  | yes | TE |
| at_locus.08444 | 5 | 10,418,615 | 10,418,960 | 0  | 0 | 5  | yes | TE |
| at_locus.08445 | 5 | 10,420,163 | 10,420,315 | 1  | 0 | 4  | yes |    |
| at_locus.08446 | 5 | 10,433,114 | 10,433,385 | 4  | 0 | 3  | no  | TE |
| at_locus.08447 | 5 | 10,435,036 | 10,435,383 | 2  | 0 | 3  | no  | TE |
| at_locus.08448 | 5 | 10,438,616 | 10,439,298 | 3  | 0 | 3  | yes | TE |
| at_locus.08449 | 5 | 10,441,683 | 10,441,727 | 5  | 0 | 0  | yes | TE |
| at_locus.08450 | 5 | 10,442,549 | 10,442,595 | 4  | 0 | 0  | no  | TE |
| at_locus.08451 | 5 | 10,443,210 | 10,443,351 | 1  | 0 | 8  | no  | TE |
| at_locus.08452 | 5 | 10,444,103 | 10,444,153 | 4  | 0 | 0  | no  | TE |
| at_locus.08453 | 5 | 10,445,180 | 10,446,259 | 19 | 0 | 23 | no  | TE |
| at_locus.08454 | 5 | 10,446,580 | 10,446,808 | 5  | 0 | 0  | no  | TE |
| at_locus.08455 | 5 | 10,475,153 | 10,475,447 | 8  | 1 | 1  | yes |    |
| at_locus.08456 | 5 | 10,479,865 | 10,480,537 | 25 | 2 | 1  | yes | TE |
| at_locus.08457 | 5 | 10,528,255 | 10,528,373 | 5  | 0 | 0  | yes |    |
| at_locus.08458 | 5 | 10,533,063 | 10,533,286 | 1  | 0 | 4  | no  | TE |
| at_locus.08459 | 5 | 10,534,720 | 10,535,126 | 6  | 1 | 10 | yes |    |
| at_locus.08460 | 5 | 10,535,540 | 10,535,917 | 5  | 0 | 4  | yes |    |
| at_locus.08461 | 5 | 10,536,881 | 10,537,048 | 4  | 0 | 0  | yes | TE |
| at_locus.08462 | 5 | 10,537,932 | 10,538,280 | 2  | 0 | 10 | yes |    |
| at_locus.08463 | 5 | 10,543,960 | 10,544,548 | 2  | 0 | 10 | yes | TE |
| at_locus.08464 | 5 | 10,546,602 | 10,546,943 | 10 | 0 | 5  | yes |    |
| at_locus.08465 | 5 | 10,561,493 | 10,562,513 | 24 | 0 | 17 | yes | TE |
| at_locus.08466 | 5 | 10,565,785 | 10,566,016 | 7  | 0 | 0  | yes |    |
| at_locus.08467 | 5 | 10,566,683 | 10,567,541 | 16 | 0 | 9  | yes |    |
| at_locus.08468 | 5 | 10,570,552 | 10,571,359 | 29 | 2 | 29 | yes |    |
| at_locus.08469 | 5 | 10,582,469 | 10,582,672 | 4  | 0 | 5  | no  | TE |
| at_locus.08470 | 5 | 10,583,043 | 10,583,215 | 4  | 0 | 3  | no  | TE |
| at_locus.08471 | 5 | 10,583,972 | 10,584,637 | 9  | 0 | 8  | no  | TE |
| at_locus.08472 | 5 | 10,588,429 | 10,588,761 | 7  | 0 | 4  | no  | TE |

|                |   |            |            |     |   |     |     |    |
|----------------|---|------------|------------|-----|---|-----|-----|----|
| at_locus.08473 | 5 | 10,589,094 | 10,589,494 | 7   | 0 | 18  | no  | TE |
| at_locus.08474 | 5 | 10,590,038 | 10,590,200 | 0   | 0 | 6   | no  | TE |
| at_locus.08475 | 5 | 10,592,986 | 10,593,990 | 10  | 0 | 13  | no  | TE |
| at_locus.08476 | 5 | 10,594,225 | 10,594,517 | 9   | 0 | 6   | no  | TE |
| at_locus.08477 | 5 | 10,594,623 | 10,594,809 | 4   | 0 | 0   | no  | TE |
| at_locus.08478 | 5 | 10,595,484 | 10,596,325 | 21  | 1 | 16  | no  | TE |
| at_locus.08479 | 5 | 10,612,988 | 10,613,394 | 8   | 0 | 3   | yes |    |
| at_locus.08480 | 5 | 10,635,067 | 10,635,238 | 4   | 0 | 0   | yes | TE |
| at_locus.08481 | 5 | 10,644,192 | 10,644,822 | 13  | 0 | 1   | yes | TE |
| at_locus.08482 | 5 | 10,645,088 | 10,645,825 | 9   | 1 | 15  | yes | TE |
| at_locus.08483 | 5 | 10,646,331 | 10,646,821 | 9   | 0 | 0   | yes | TE |
| at_locus.08484 | 5 | 10,660,608 | 10,661,392 | 12  | 0 | 9   | yes | TE |
| at_locus.08485 | 5 | 10,667,699 | 10,668,320 | 7   | 0 | 3   | yes | TE |
| at_locus.08486 | 5 | 10,668,596 | 10,668,793 | 1   | 0 | 9   | yes | TE |
| at_locus.08487 | 5 | 10,669,011 | 10,669,126 | 0   | 0 | 4   | yes | TE |
| at_locus.08488 | 5 | 10,681,276 | 10,681,449 | 43  | 2 | 3   | yes | TE |
| at_locus.08489 | 5 | 10,681,640 | 10,681,915 | 0   | 0 | 2   | no  | TE |
| at_locus.08490 | 5 | 10,682,118 | 10,682,249 | 26  | 0 | 0   | no  | TE |
| at_locus.08491 | 5 | 10,695,747 | 10,696,114 | 16  | 0 | 2   | no  | TE |
| at_locus.08492 | 5 | 10,699,320 | 10,699,609 | 0   | 0 | 6   | no  | TE |
| at_locus.08493 | 5 | 10,701,839 | 10,702,055 | 7   | 0 | 0   | yes | TE |
| at_locus.08494 | 5 | 10,706,390 | 10,706,536 | 4   | 0 | 2   | yes | TE |
| at_locus.08495 | 5 | 10,714,416 | 10,715,005 | 24  | 1 | 0   | yes | TE |
| at_locus.08496 | 5 | 10,715,263 | 10,715,744 | 42  | 4 | 0   | yes | TE |
| at_locus.08497 | 5 | 10,731,248 | 10,731,633 | 1   | 0 | 5   | no  | TE |
| at_locus.08498 | 5 | 10,734,896 | 10,735,345 | 5   | 1 | 5   | yes | TE |
| at_locus.08499 | 5 | 10,740,296 | 10,740,468 | 0   | 0 | 4   | no  | TE |
| at_locus.08500 | 5 | 10,745,713 | 10,745,865 | 3   | 0 | 6   | yes | TE |
| at_locus.08501 | 5 | 10,746,918 | 10,747,284 | 6   | 0 | 2   | yes |    |
| at_locus.08502 | 5 | 10,755,394 | 10,755,439 | 0   | 0 | 5   | yes |    |
| at_locus.08503 | 5 | 10,760,073 | 10,760,526 | 11  | 0 | 7   | yes | TE |
| at_locus.08504 | 5 | 10,760,928 | 10,760,997 | 0   | 0 | 5   | yes |    |
| at_locus.08505 | 5 | 10,761,203 | 10,761,615 | 6   | 0 | 6   | yes | TE |
| at_locus.08506 | 5 | 10,762,273 | 10,762,643 | 6   | 0 | 6   | yes |    |
| at_locus.08507 | 5 | 10,764,308 | 10,769,968 | 148 | 4 | 161 | yes | TE |
| at_locus.08508 | 5 | 10,770,027 | 10,770,616 | 10  | 0 | 24  | no  | TE |
| at_locus.08509 | 5 | 10,770,865 | 10,772,425 | 72  | 3 | 22  | yes | TE |

|                |   |            |            |    |   |    |     |    |
|----------------|---|------------|------------|----|---|----|-----|----|
| at_locus.08510 | 5 | 10,777,527 | 10,777,588 | 0  | 0 | 5  | no  | TE |
| at_locus.08511 | 5 | 10,777,819 | 10,778,219 | 10 | 0 | 9  | no  | TE |
| at_locus.08512 | 5 | 10,785,926 | 10,786,407 | 9  | 0 | 8  | yes | TE |
| at_locus.08513 | 5 | 10,786,927 | 10,787,338 | 1  | 0 | 6  | no  | TE |
| at_locus.08514 | 5 | 10,827,198 | 10,827,469 | 9  | 0 | 5  | yes | TE |
| at_locus.08515 | 5 | 10,845,173 | 10,845,877 | 10 | 0 | 1  | yes | TE |
| at_locus.08516 | 5 | 10,854,934 | 10,855,021 | 4  | 0 | 1  | yes |    |
| at_locus.08517 | 5 | 10,855,683 | 10,856,066 | 7  | 0 | 0  | yes |    |
| at_locus.08518 | 5 | 10,867,810 | 10,867,923 | 6  | 0 | 7  | no  | TE |
| at_locus.08519 | 5 | 10,868,198 | 10,868,998 | 8  | 0 | 9  | no  | TE |
| at_locus.08520 | 5 | 10,873,665 | 10,873,757 | 4  | 0 | 0  | no  | TE |
| at_locus.08521 | 5 | 10,874,116 | 10,874,242 | 6  | 0 | 1  | yes | TE |
| at_locus.08522 | 5 | 10,888,925 | 10,889,167 | 2  | 1 | 5  | yes | TE |
| at_locus.08523 | 5 | 10,902,735 | 10,903,016 | 0  | 0 | 10 | yes | TE |
| at_locus.08524 | 5 | 10,909,197 | 10,909,543 | 4  | 0 | 5  | no  | TE |
| at_locus.08525 | 5 | 10,915,602 | 10,915,624 | 0  | 0 | 4  | yes |    |
| at_locus.08526 | 5 | 10,915,998 | 10,916,115 | 1  | 0 | 5  | yes | TE |
| at_locus.08527 | 5 | 10,916,353 | 10,916,803 | 5  | 0 | 2  | no  | TE |
| at_locus.08528 | 5 | 10,916,959 | 10,917,075 | 3  | 0 | 4  | no  | TE |
| at_locus.08529 | 5 | 10,924,287 | 10,924,333 | 9  | 0 | 0  | no  | TE |
| at_locus.08530 | 5 | 10,938,479 | 10,938,709 | 8  | 0 | 0  | yes | TE |
| at_locus.08531 | 5 | 10,946,819 | 10,947,323 | 9  | 0 | 3  | no  | TE |
| at_locus.08532 | 5 | 10,947,506 | 10,947,648 | 2  | 0 | 4  | no  | TE |
| at_locus.08533 | 5 | 10,948,670 | 10,948,822 | 6  | 0 | 0  | no  | TE |
| at_locus.08534 | 5 | 10,952,179 | 10,952,726 | 8  | 0 | 3  | no  | TE |
| at_locus.08535 | 5 | 10,953,389 | 10,953,909 | 2  | 0 | 4  | no  | TE |
| at_locus.08536 | 5 | 10,956,256 | 10,956,441 | 0  | 0 | 3  | yes | TE |
| at_locus.08537 | 5 | 10,962,103 | 10,962,128 | 4  | 0 | 0  | no  | TE |
| at_locus.08538 | 5 | 11,007,177 | 11,007,413 | 0  | 0 | 4  | no  | TE |
| at_locus.08539 | 5 | 11,013,742 | 11,013,989 | 6  | 0 | 1  | no  | TE |
| at_locus.08540 | 5 | 11,016,578 | 11,017,142 | 13 | 1 | 12 | no  | TE |
| at_locus.08541 | 5 | 11,018,722 | 11,018,944 | 5  | 0 | 3  | no  | TE |
| at_locus.08542 | 5 | 11,025,340 | 11,025,408 | 10 | 0 | 0  | no  | TE |
| at_locus.08543 | 5 | 11,026,134 | 11,026,380 | 6  | 0 | 0  | no  | TE |
| at_locus.08544 | 5 | 11,027,057 | 11,027,991 | 67 | 5 | 0  | yes | TE |
| at_locus.08545 | 5 | 11,030,482 | 11,030,669 | 1  | 0 | 4  | yes |    |
| at_locus.08546 | 5 | 11,073,010 | 11,073,388 | 12 | 0 | 1  | no  | TE |

|                |   |            |            |    |   |    |     |    |
|----------------|---|------------|------------|----|---|----|-----|----|
| at_locus.08547 | 5 | 11,074,893 | 11,075,196 | 0  | 0 | 5  | yes | TE |
| at_locus.08548 | 5 | 11,075,330 | 11,075,555 | 4  | 0 | 3  | no  | TE |
| at_locus.08549 | 5 | 11,078,184 | 11,078,744 | 5  | 0 | 8  | no  | TE |
| at_locus.08550 | 5 | 11,078,957 | 11,079,957 | 14 | 0 | 16 | no  | TE |
| at_locus.08551 | 5 | 11,080,303 | 11,081,203 | 9  | 1 | 16 | yes | TE |
| at_locus.08552 | 5 | 11,083,365 | 11,083,654 | 5  | 0 | 1  | no  | TE |
| at_locus.08553 | 5 | 11,083,656 | 11,084,485 | 12 | 0 | 18 | no  | TE |
| at_locus.08554 | 5 | 11,084,938 | 11,085,036 | 11 | 0 | 6  | no  | TE |
| at_locus.08555 | 5 | 11,085,414 | 11,085,570 | 4  | 0 | 2  | no  | TE |
| at_locus.08556 | 5 | 11,086,467 | 11,086,634 | 0  | 2 | 4  | yes |    |
| at_locus.08557 | 5 | 11,099,146 | 11,099,320 | 2  | 0 | 6  | yes | TE |
| at_locus.08558 | 5 | 11,099,697 | 11,100,357 | 12 | 3 | 4  | no  | TE |
| at_locus.08559 | 5 | 11,100,827 | 11,101,000 | 2  | 0 | 4  | no  | TE |
| at_locus.08560 | 5 | 11,101,703 | 11,102,126 | 9  | 0 | 3  | no  | TE |
| at_locus.08561 | 5 | 11,102,396 | 11,102,819 | 4  | 0 | 5  | yes | TE |
| at_locus.08562 | 5 | 11,110,355 | 11,110,768 | 0  | 0 | 5  | no  | TE |
| at_locus.08563 | 5 | 11,111,107 | 11,111,500 | 11 | 0 | 1  | no  | TE |
| at_locus.08564 | 5 | 11,118,758 | 11,119,137 | 7  | 0 | 1  | no  | TE |
| at_locus.08565 | 5 | 11,128,689 | 11,129,097 | 9  | 0 | 4  | no  | TE |
| at_locus.08566 | 5 | 11,134,757 | 11,134,868 | 4  | 0 | 2  | no  | TE |
| at_locus.08567 | 5 | 11,135,602 | 11,135,981 | 6  | 0 | 1  | no  | TE |
| at_locus.08568 | 5 | 11,138,504 | 11,139,273 | 17 | 2 | 8  | no  | TE |
| at_locus.08569 | 5 | 11,139,579 | 11,140,127 | 5  | 0 | 3  | yes | TE |
| at_locus.08570 | 5 | 11,140,606 | 11,140,784 | 4  | 1 | 2  | no  | TE |
| at_locus.08571 | 5 | 11,143,045 | 11,143,210 | 5  | 0 | 3  | no  | TE |
| at_locus.08572 | 5 | 11,144,266 | 11,144,525 | 14 | 2 | 7  | no  | TE |
| at_locus.08573 | 5 | 11,144,736 | 11,145,096 | 5  | 0 | 4  | no  | TE |
| at_locus.08574 | 5 | 11,145,527 | 11,145,597 | 4  | 0 | 0  | no  | TE |
| at_locus.08575 | 5 | 11,146,068 | 11,146,281 | 2  | 0 | 5  | no  | TE |
| at_locus.08576 | 5 | 11,147,375 | 11,147,936 | 4  | 0 | 7  | no  | TE |
| at_locus.08577 | 5 | 11,150,532 | 11,150,769 | 4  | 0 | 0  | yes | TE |
| at_locus.08578 | 5 | 11,159,559 | 11,159,714 | 0  | 0 | 4  | no  | TE |
| at_locus.08579 | 5 | 11,160,094 | 11,160,266 | 4  | 0 | 3  | no  | TE |
| at_locus.08580 | 5 | 11,161,223 | 11,161,840 | 6  | 0 | 4  | no  | TE |
| at_locus.08581 | 5 | 11,164,214 | 11,164,768 | 8  | 0 | 7  | no  | TE |
| at_locus.08582 | 5 | 11,164,966 | 11,165,121 | 2  | 0 | 4  | no  | TE |
| at_locus.08583 | 5 | 11,165,501 | 11,165,833 | 7  | 0 | 4  | no  | TE |

|                |   |            |            |     |     |     |     |    |
|----------------|---|------------|------------|-----|-----|-----|-----|----|
| at_locus.08584 | 5 | 11,170,901 | 11,171,241 | 3   | 0   | 4   | no  | TE |
| at_locus.08585 | 5 | 11,176,300 | 11,176,598 | 1   | 0   | 4   | yes | TE |
| at_locus.08586 | 5 | 11,177,272 | 11,177,773 | 12  | 0   | 4   | no  | TE |
| at_locus.08587 | 5 | 11,181,033 | 11,182,166 | 28  | 0   | 7   | no  | TE |
| at_locus.08588 | 5 | 11,182,566 | 11,183,132 | 3   | 0   | 6   | no  | TE |
| at_locus.08589 | 5 | 11,184,556 | 11,188,947 | 331 | 288 | 405 | yes |    |
| at_locus.08590 | 5 | 11,194,932 | 11,195,507 | 12  | 4   | 9   | no  | TE |
| at_locus.08591 | 5 | 11,197,515 | 11,197,538 | 4   | 0   | 0   | no  | TE |
| at_locus.08592 | 5 | 11,202,555 | 11,202,579 | 4   | 0   | 1   | no  |    |
| at_locus.08593 | 5 | 11,203,647 | 11,204,017 | 20  | 0   | 3   | no  | TE |
| at_locus.08594 | 5 | 11,204,780 | 11,205,560 | 7   | 0   | 8   | no  | TE |
| at_locus.08595 | 5 | 11,213,211 | 11,213,404 | 2   | 0   | 6   | no  | TE |
| at_locus.08596 | 5 | 11,213,634 | 11,213,781 | 9   | 0   | 9   | no  | TE |
| at_locus.08597 | 5 | 11,213,959 | 11,216,265 | 31  | 4   | 50  | yes | TE |
| at_locus.08598 | 5 | 11,216,416 | 11,216,772 | 5   | 0   | 0   | no  | TE |
| at_locus.08599 | 5 | 11,224,662 | 11,224,830 | 0   | 0   | 4   | no  | TE |
| at_locus.08600 | 5 | 11,225,171 | 11,225,335 | 6   | 0   | 6   | no  | TE |
| at_locus.08601 | 5 | 11,225,847 | 11,226,306 | 63  | 104 | 175 | no  | TE |
| at_locus.08602 | 5 | 11,244,846 | 11,244,998 | 6   | 0   | 6   | no  | TE |
| at_locus.08603 | 5 | 11,246,170 | 11,255,054 | 43  | 0   | 44  | yes |    |
| at_locus.08604 | 5 | 11,255,292 | 11,255,760 | 32  | 0   | 33  | no  |    |
| at_locus.08605 | 5 | 11,255,958 | 11,257,056 | 38  | 0   | 40  | no  |    |
| at_locus.08606 | 5 | 11,257,254 | 11,283,764 | 48  | 0   | 44  | yes |    |
| at_locus.08607 | 5 | 11,283,878 | 11,285,376 | 26  | 0   | 25  | yes |    |
| at_locus.08608 | 5 | 11,289,136 | 11,289,298 | 4   | 1   | 4   | yes | TE |
| at_locus.08609 | 5 | 11,293,948 | 11,294,181 | 5   | 0   | 0   | no  |    |
| at_locus.08610 | 5 | 11,306,575 | 11,306,744 | 4   | 0   | 2   | no  | TE |
| at_locus.08611 | 5 | 11,314,753 | 11,314,909 | 8   | 0   | 0   | yes | TE |
| at_locus.08612 | 5 | 11,321,335 | 11,321,538 | 3   | 0   | 4   | no  | TE |
| at_locus.08613 | 5 | 11,326,918 | 11,327,047 | 47  | 108 | 95  | no  |    |
| at_locus.08614 | 5 | 11,327,281 | 11,327,581 | 6   | 15  | 28  | yes |    |
| at_locus.08615 | 5 | 11,327,950 | 11,328,375 | 33  | 89  | 72  | yes |    |
| at_locus.08616 | 5 | 11,328,703 | 11,328,806 | 2   | 9   | 15  | no  |    |
| at_locus.08617 | 5 | 11,329,672 | 11,329,850 | 7   | 17  | 45  | no  |    |
| at_locus.08618 | 5 | 11,330,730 | 11,330,753 | 7   | 0   | 1   | no  |    |
| at_locus.08619 | 5 | 11,332,006 | 11,332,407 | 11  | 4   | 18  | no  |    |
| at_locus.08620 | 5 | 11,333,069 | 11,333,094 | 1   | 4   | 2   | yes |    |

|                |   |            |            |     |   |     |     |    |
|----------------|---|------------|------------|-----|---|-----|-----|----|
| at_locus.08621 | 5 | 11,333,465 | 11,333,484 | 0   | 5 | 2   | no  |    |
| at_locus.08622 | 5 | 11,333,572 | 11,333,598 | 8   | 0 | 0   | no  |    |
| at_locus.08623 | 5 | 11,333,792 | 11,333,990 | 2   | 6 | 4   | yes |    |
| at_locus.08624 | 5 | 11,337,587 | 11,337,620 | 4   | 0 | 0   | no  | TE |
| at_locus.08625 | 5 | 11,337,795 | 11,344,686 | 175 | 1 | 175 | yes | TE |
| at_locus.08626 | 5 | 11,345,148 | 11,345,529 | 6   | 0 | 5   | no  | TE |
| at_locus.08627 | 5 | 11,345,804 | 11,346,186 | 5   | 0 | 5   | no  | TE |
| at_locus.08628 | 5 | 11,346,445 | 11,349,119 | 85  | 2 | 67  | no  | TE |
| at_locus.08629 | 5 | 11,354,844 | 11,355,267 | 8   | 0 | 4   | no  | TE |
| at_locus.08630 | 5 | 11,355,972 | 11,356,265 | 2   | 0 | 6   | no  | TE |
| at_locus.08631 | 5 | 11,364,790 | 11,365,236 | 5   | 0 | 2   | no  | TE |
| at_locus.08632 | 5 | 11,372,072 | 11,372,269 | 0   | 0 | 4   | no  | TE |
| at_locus.08633 | 5 | 11,372,540 | 11,372,630 | 0   | 0 | 4   | no  | TE |
| at_locus.08634 | 5 | 11,381,062 | 11,381,085 | 4   | 0 | 0   | no  | TE |
| at_locus.08635 | 5 | 11,385,368 | 11,385,523 | 4   | 0 | 5   | yes | TE |
| at_locus.08636 | 5 | 11,388,990 | 11,389,201 | 0   | 0 | 5   | no  | TE |
| at_locus.08637 | 5 | 11,389,957 | 11,390,139 | 0   | 0 | 4   | no  | TE |
| at_locus.08638 | 5 | 11,390,516 | 11,390,727 | 4   | 0 | 2   | no  | TE |
| at_locus.08639 | 5 | 11,393,329 | 11,393,501 | 4   | 0 | 2   | no  | TE |
| at_locus.08640 | 5 | 11,396,095 | 11,396,327 | 6   | 0 | 1   | no  | TE |
| at_locus.08641 | 5 | 11,400,461 | 11,400,699 | 4   | 0 | 1   | no  | TE |
| at_locus.08642 | 5 | 11,401,067 | 11,401,267 | 8   | 0 | 1   | yes | TE |
| at_locus.08643 | 5 | 11,401,503 | 11,401,713 | 4   | 0 | 2   | no  | TE |
| at_locus.08644 | 5 | 11,413,915 | 11,414,311 | 8   | 0 | 5   | no  | TE |
| at_locus.08645 | 5 | 11,414,450 | 11,414,627 | 3   | 0 | 5   | no  | TE |
| at_locus.08646 | 5 | 11,415,579 | 11,416,308 | 10  | 0 | 8   | no  | TE |
| at_locus.08647 | 5 | 11,416,562 | 11,416,591 | 0   | 0 | 4   | no  | TE |
| at_locus.08648 | 5 | 11,416,986 | 11,417,283 | 1   | 0 | 5   | yes | TE |
| at_locus.08649 | 5 | 11,417,974 | 11,418,220 | 4   | 0 | 5   | no  | TE |
| at_locus.08650 | 5 | 11,419,428 | 11,420,414 | 35  | 3 | 25  | yes | TE |
| at_locus.08651 | 5 | 11,420,696 | 11,422,237 | 16  | 1 | 20  | no  | TE |
| at_locus.08652 | 5 | 11,422,463 | 11,422,648 | 7   | 0 | 6   | no  | TE |
| at_locus.08653 | 5 | 11,423,542 | 11,424,460 | 7   | 3 | 13  | no  | TE |
| at_locus.08654 | 5 | 11,430,108 | 11,430,235 | 0   | 0 | 5   | no  | TE |
| at_locus.08655 | 5 | 11,430,737 | 11,431,090 | 4   | 0 | 7   | no  | TE |
| at_locus.08656 | 5 | 11,433,337 | 11,433,387 | 7   | 0 | 0   | no  | TE |
| at_locus.08657 | 5 | 11,433,945 | 11,434,125 | 25  | 0 | 3   | yes |    |

|                |   |            |            |    |   |    |     |    |
|----------------|---|------------|------------|----|---|----|-----|----|
| at_locus.08658 | 5 | 11,437,824 | 11,437,951 | 1  | 0 | 5  | no  | TE |
| at_locus.08659 | 5 | 11,438,415 | 11,441,489 | 41 | 1 | 35 | no  | TE |
| at_locus.08660 | 5 | 11,441,705 | 11,442,180 | 8  | 0 | 10 | no  | TE |
| at_locus.08661 | 5 | 11,442,595 | 11,443,065 | 5  | 0 | 4  | yes | TE |
| at_locus.08662 | 5 | 11,443,631 | 11,443,891 | 2  | 0 | 7  | no  | TE |
| at_locus.08663 | 5 | 11,444,150 | 11,444,505 | 5  | 0 | 7  | no  | TE |
| at_locus.08664 | 5 | 11,444,934 | 11,445,308 | 11 | 0 | 8  | no  | TE |
| at_locus.08665 | 5 | 11,445,487 | 11,445,864 | 5  | 0 | 2  | no  | TE |
| at_locus.08666 | 5 | 11,455,093 | 11,455,489 | 7  | 0 | 3  | no  | TE |
| at_locus.08667 | 5 | 11,455,853 | 11,456,383 | 13 | 3 | 18 | no  | TE |
| at_locus.08668 | 5 | 11,458,644 | 11,458,703 | 26 | 0 | 9  | no  |    |
| at_locus.08669 | 5 | 11,477,584 | 11,477,789 | 3  | 0 | 4  | no  | TE |
| at_locus.08670 | 5 | 11,478,052 | 11,479,287 | 22 | 1 | 33 | no  | TE |
| at_locus.08671 | 5 | 11,485,442 | 11,485,679 | 1  | 0 | 5  | no  | TE |
| at_locus.08672 | 5 | 11,488,254 | 11,488,503 | 5  | 0 | 9  | no  | TE |
| at_locus.08673 | 5 | 11,496,508 | 11,496,677 | 4  | 0 | 2  | no  | TE |
| at_locus.08674 | 5 | 11,502,032 | 11,502,209 | 4  | 0 | 0  | no  | TE |
| at_locus.08675 | 5 | 11,503,234 | 11,503,711 | 2  | 1 | 5  | no  | TE |
| at_locus.08676 | 5 | 11,519,555 | 11,519,964 | 23 | 0 | 8  | no  | TE |
| at_locus.08677 | 5 | 11,530,228 | 11,530,513 | 15 | 0 | 0  | no  | TE |
| at_locus.08678 | 5 | 11,531,085 | 11,531,183 | 8  | 0 | 0  | no  | TE |
| at_locus.08679 | 5 | 11,532,047 | 11,532,448 | 11 | 0 | 6  | no  | TE |
| at_locus.08680 | 5 | 11,555,426 | 11,555,505 | 5  | 0 | 2  | no  |    |
| at_locus.08681 | 5 | 11,589,987 | 11,590,063 | 0  | 0 | 4  | no  | TE |
| at_locus.08682 | 5 | 11,591,312 | 11,591,491 | 2  | 0 | 4  | no  | TE |
| at_locus.08683 | 5 | 11,594,532 | 11,594,603 | 9  | 0 | 2  | no  | TE |
| at_locus.08684 | 5 | 11,594,819 | 11,595,930 | 10 | 0 | 13 | no  | TE |
| at_locus.08685 | 5 | 11,596,980 | 11,597,054 | 1  | 0 | 4  | no  | TE |
| at_locus.08686 | 5 | 11,597,762 | 11,598,230 | 7  | 0 | 14 | no  | TE |
| at_locus.08687 | 5 | 11,599,886 | 11,600,072 | 7  | 0 | 3  | yes | TE |
| at_locus.08688 | 5 | 11,600,588 | 11,601,321 | 6  | 0 | 11 | yes | TE |
| at_locus.08689 | 5 | 11,601,525 | 11,602,495 | 18 | 0 | 18 | no  | TE |
| at_locus.08690 | 5 | 11,602,704 | 11,603,053 | 4  | 0 | 1  | no  | TE |
| at_locus.08691 | 5 | 11,603,149 | 11,603,337 | 2  | 0 | 4  | no  | TE |
| at_locus.08692 | 5 | 11,603,569 | 11,603,958 | 19 | 0 | 11 | no  | TE |
| at_locus.08693 | 5 | 11,604,186 | 11,604,418 | 6  | 0 | 13 | no  | TE |
| at_locus.08694 | 5 | 11,604,857 | 11,604,892 | 4  | 0 | 0  | no  | TE |



|                |   |            |            |     |   |     |     |    |
|----------------|---|------------|------------|-----|---|-----|-----|----|
| at_locus.08695 | 5 | 11,608,386 | 11,608,533 | 0   | 0 | 5   | no  | TE |
| at_locus.08696 | 5 | 11,617,211 | 11,617,558 | 6   | 0 | 2   | yes | TE |
| at_locus.08697 | 5 | 11,618,216 | 11,618,995 | 8   | 0 | 8   | no  | TE |
| at_locus.08698 | 5 | 11,621,329 | 11,621,688 | 7   | 0 | 9   | no  | TE |
| at_locus.08699 | 5 | 11,622,153 | 11,622,285 | 4   | 0 | 0   | no  | TE |
| at_locus.08700 | 5 | 11,622,648 | 11,622,820 | 5   | 0 | 1   | no  | TE |
| at_locus.08701 | 5 | 11,628,475 | 11,628,695 | 5   | 0 | 0   | no  | TE |
| at_locus.08702 | 5 | 11,656,602 | 11,656,740 | 15  | 0 | 9   | no  | TE |
| at_locus.08703 | 5 | 11,656,922 | 11,657,803 | 22  | 0 | 16  | yes | TE |
| at_locus.08704 | 5 | 11,658,170 | 11,658,343 | 7   | 1 | 2   | no  | TE |
| at_locus.08705 | 5 | 11,662,011 | 11,663,359 | 13  | 0 | 5   | yes | TE |
| at_locus.08706 | 5 | 11,664,696 | 11,664,880 | 1   | 0 | 6   | no  | TE |
| at_locus.08707 | 5 | 11,666,547 | 11,667,171 | 4   | 0 | 8   | no  | TE |
| at_locus.08708 | 5 | 11,667,453 | 11,667,729 | 0   | 0 | 5   | no  | TE |
| at_locus.08709 | 5 | 11,667,941 | 11,668,997 | 28  | 2 | 24  | yes | TE |
| at_locus.08710 | 5 | 11,677,193 | 11,677,315 | 5   | 0 | 4   | no  | TE |
| at_locus.08711 | 5 | 11,677,730 | 11,677,852 | 4   | 0 | 4   | no  | TE |
| at_locus.08712 | 5 | 11,678,103 | 11,678,905 | 15  | 1 | 16  | no  | TE |
| at_locus.08713 | 5 | 11,682,132 | 11,683,014 | 7   | 2 | 8   | no  | TE |
| at_locus.08714 | 5 | 11,684,586 | 11,685,731 | 17  | 2 | 18  | no  | TE |
| at_locus.08715 | 5 | 11,686,044 | 11,686,209 | 0   | 0 | 4   | no  | TE |
| at_locus.08716 | 5 | 11,686,847 | 11,688,567 | 14  | 2 | 14  | no  | TE |
| at_locus.08717 | 5 | 11,688,606 | 11,688,822 | 5   | 0 | 2   | no  | TE |
| at_locus.08718 | 5 | 11,689,385 | 11,690,523 | 9   | 2 | 9   | no  | TE |
| at_locus.08719 | 5 | 11,690,759 | 11,691,715 | 9   | 2 | 11  | no  | TE |
| at_locus.08720 | 5 | 11,692,119 | 11,692,313 | 0   | 0 | 3   | no  | TE |
| at_locus.08721 | 5 | 11,692,352 | 11,693,187 | 6   | 1 | 7   | no  | TE |
| at_locus.08722 | 5 | 11,693,750 | 11,694,888 | 9   | 2 | 9   | no  | TE |
| at_locus.08723 | 5 | 11,695,124 | 11,696,080 | 9   | 2 | 11  | no  | TE |
| at_locus.08724 | 5 | 11,696,484 | 11,696,678 | 0   | 0 | 3   | no  | TE |
| at_locus.08725 | 5 | 11,696,717 | 11,697,552 | 6   | 1 | 7   | no  | TE |
| at_locus.08726 | 5 | 11,697,888 | 11,698,844 | 9   | 2 | 10  | no  | TE |
| at_locus.08727 | 5 | 11,699,248 | 11,699,442 | 0   | 0 | 3   | no  | TE |
| at_locus.08728 | 5 | 11,699,481 | 11,700,061 | 6   | 1 | 7   | no  | TE |
| at_locus.08729 | 5 | 11,700,250 | 11,701,214 | 14  | 1 | 23  | no  | TE |
| at_locus.08730 | 5 | 11,703,289 | 11,710,177 | 170 | 1 | 177 | yes | TE |
| at_locus.08731 | 5 | 11,710,639 | 11,710,816 | 5   | 0 | 1   | no  | TE |

|                |   |            |            |     |   |     |     |    |
|----------------|---|------------|------------|-----|---|-----|-----|----|
| at_locus.08732 | 5 | 11,711,294 | 11,711,698 | 5   | 0 | 6   | no  | TE |
| at_locus.08733 | 5 | 11,711,935 | 11,714,581 | 91  | 1 | 77  | yes | TE |
| at_locus.08734 | 5 | 11,717,389 | 11,717,881 | 14  | 0 | 5   | no  | TE |
| at_locus.08735 | 5 | 11,718,434 | 11,732,804 | 163 | 5 | 213 | yes | TE |
| at_locus.08736 | 5 | 11,733,729 | 11,733,948 | 4   | 0 | 3   | no  | TE |
| at_locus.08737 | 5 | 11,735,703 | 11,735,872 | 1   | 0 | 6   | no  | TE |
| at_locus.08738 | 5 | 11,736,207 | 11,736,916 | 6   | 0 | 14  | no  | TE |
| at_locus.08739 | 5 | 11,738,086 | 11,742,203 | 109 | 4 | 154 | yes | TE |
| at_locus.08740 | 5 | 11,743,259 | 11,747,191 | 53  | 5 | 80  | no  | TE |
| at_locus.08741 | 5 | 11,747,446 | 11,753,630 | 57  | 5 | 94  | yes | TE |
| at_locus.08742 | 5 | 11,753,947 | 11,755,598 | 22  | 3 | 23  | no  | TE |
| at_locus.08743 | 5 | 11,758,911 | 11,759,366 | 15  | 0 | 5   | no  | TE |
| at_locus.08744 | 5 | 11,763,144 | 11,763,169 | 0   | 0 | 4   | no  | TE |
| at_locus.08745 | 5 | 11,763,692 | 11,764,866 | 18  | 1 | 16  | no  | TE |
| at_locus.08746 | 5 | 11,768,930 | 11,769,087 | 1   | 0 | 5   | no  | TE |
| at_locus.08747 | 5 | 11,769,654 | 11,769,963 | 11  | 0 | 2   | no  | TE |
| at_locus.08748 | 5 | 11,771,288 | 11,772,224 | 20  | 2 | 16  | no  | TE |
| at_locus.08749 | 5 | 11,772,684 | 11,773,769 | 20  | 4 | 23  | yes | TE |
| at_locus.08750 | 5 | 11,774,371 | 11,774,944 | 14  | 0 | 32  | no  | TE |
| at_locus.08751 | 5 | 11,775,173 | 11,775,655 | 16  | 1 | 35  | no  | TE |
| at_locus.08752 | 5 | 11,775,884 | 11,776,365 | 8   | 0 | 4   | yes | TE |
| at_locus.08753 | 5 | 11,776,885 | 11,777,074 | 7   | 0 | 3   | no  | TE |
| at_locus.08754 | 5 | 11,777,594 | 11,777,783 | 7   | 0 | 3   | no  | TE |
| at_locus.08755 | 5 | 11,778,303 | 11,778,492 | 7   | 0 | 3   | no  | TE |
| at_locus.08756 | 5 | 11,779,012 | 11,779,201 | 7   | 0 | 3   | no  | TE |
| at_locus.08757 | 5 | 11,780,140 | 11,780,974 | 19  | 0 | 33  | no  | TE |
| at_locus.08758 | 5 | 11,781,738 | 11,781,815 | 0   | 0 | 5   | no  | TE |
| at_locus.08759 | 5 | 11,783,391 | 11,783,416 | 5   | 0 | 2   | no  | TE |
| at_locus.08760 | 5 | 11,785,221 | 11,786,725 | 26  | 0 | 18  | yes | TE |
| at_locus.08761 | 5 | 11,788,061 | 11,788,564 | 3   | 0 | 5   | no  | TE |
| at_locus.08762 | 5 | 11,789,129 | 11,789,639 | 8   | 0 | 6   | no  | TE |
| at_locus.08763 | 5 | 11,789,827 | 11,791,294 | 10  | 1 | 35  | no  | TE |
| at_locus.08764 | 5 | 11,791,425 | 11,792,987 | 26  | 0 | 26  | no  | TE |
| at_locus.08765 | 5 | 11,793,335 | 11,793,423 | 0   | 0 | 4   | yes | TE |
| at_locus.08766 | 5 | 11,793,685 | 11,793,961 | 9   | 0 | 6   | no  | TE |
| at_locus.08767 | 5 | 11,794,676 | 11,795,160 | 8   | 0 | 6   | no  | TE |
| at_locus.08768 | 5 | 11,795,505 | 11,797,400 | 41  | 0 | 35  | yes | TE |

|                |   |            |            |     |   |     |     |    |
|----------------|---|------------|------------|-----|---|-----|-----|----|
| at_locus.08769 | 5 | 11,797,830 | 11,799,924 | 44  | 5 | 54  | no  | TE |
| at_locus.08770 | 5 | 11,800,274 | 11,800,780 | 11  | 0 | 9   | yes | TE |
| at_locus.08771 | 5 | 11,801,180 | 11,801,643 | 4   | 0 | 6   | no  | TE |
| at_locus.08772 | 5 | 11,803,013 | 11,803,090 | 0   | 0 | 5   | no  | TE |
| at_locus.08773 | 5 | 11,804,213 | 11,804,340 | 5   | 0 | 4   | no  | TE |
| at_locus.08774 | 5 | 11,805,101 | 11,805,890 | 8   | 0 | 11  | no  | TE |
| at_locus.08775 | 5 | 11,806,169 | 11,806,296 | 17  | 0 | 11  | no  | TE |
| at_locus.08776 | 5 | 11,806,817 | 11,808,032 | 17  | 1 | 19  | no  | TE |
| at_locus.08777 | 5 | 11,808,299 | 11,808,426 | 17  | 0 | 11  | no  | TE |
| at_locus.08778 | 5 | 11,808,947 | 11,810,160 | 14  | 1 | 19  | no  | TE |
| at_locus.08779 | 5 | 11,810,427 | 11,810,854 | 17  | 0 | 13  | no  | TE |
| at_locus.08780 | 5 | 11,811,075 | 11,811,383 | 4   | 1 | 8   | no  | TE |
| at_locus.08781 | 5 | 11,811,514 | 11,812,278 | 16  | 0 | 9   | no  | TE |
| at_locus.08782 | 5 | 11,812,570 | 11,813,478 | 20  | 2 | 17  | no  | TE |
| at_locus.08783 | 5 | 11,813,791 | 11,814,981 | 30  | 0 | 45  | no  | TE |
| at_locus.08784 | 5 | 11,816,768 | 11,817,119 | 11  | 0 | 10  | no  | TE |
| at_locus.08785 | 5 | 11,817,222 | 11,819,631 | 69  | 5 | 58  | yes | TE |
| at_locus.08786 | 5 | 11,821,524 | 11,821,949 | 10  | 0 | 6   | no  | TE |
| at_locus.08787 | 5 | 11,822,445 | 11,823,650 | 14  | 0 | 18  | yes | TE |
| at_locus.08788 | 5 | 11,823,922 | 11,824,978 | 19  | 1 | 26  | no  | TE |
| at_locus.08789 | 5 | 11,825,416 | 11,826,454 | 23  | 2 | 24  | no  | TE |
| at_locus.08790 | 5 | 11,827,448 | 11,834,419 | 173 | 1 | 172 | no  | TE |
| at_locus.08791 | 5 | 11,834,881 | 11,835,262 | 6   | 0 | 5   | no  | TE |
| at_locus.08792 | 5 | 11,835,536 | 11,835,939 | 5   | 0 | 6   | no  | TE |
| at_locus.08793 | 5 | 11,836,176 | 11,838,911 | 84  | 2 | 75  | no  | TE |
| at_locus.08794 | 5 | 11,839,177 | 11,839,817 | 15  | 2 | 14  | no  | TE |
| at_locus.08795 | 5 | 11,840,321 | 11,840,511 | 8   | 0 | 5   | no  | TE |
| at_locus.08796 | 5 | 11,840,736 | 11,841,647 | 3   | 0 | 4   | no  | TE |
| at_locus.08797 | 5 | 11,841,901 | 11,842,290 | 8   | 0 | 10  | no  | TE |
| at_locus.08798 | 5 | 11,842,843 | 11,843,000 | 7   | 0 | 4   | no  | TE |
| at_locus.08799 | 5 | 11,843,642 | 11,844,844 | 4   | 0 | 9   | no  | TE |
| at_locus.08800 | 5 | 11,845,100 | 11,845,460 | 2   | 0 | 7   | no  | TE |
| at_locus.08801 | 5 | 11,845,958 | 11,846,347 | 7   | 0 | 9   | no  | TE |
| at_locus.08802 | 5 | 11,846,989 | 11,847,302 | 1   | 0 | 4   | no  | TE |
| at_locus.08803 | 5 | 11,847,557 | 11,850,640 | 86  | 1 | 83  | no  | TE |
| at_locus.08804 | 5 | 11,850,877 | 11,851,281 | 5   | 0 | 6   | no  | TE |
| at_locus.08805 | 5 | 11,851,650 | 11,851,937 | 5   | 0 | 4   | no  | TE |

|                |   |            |            |     |   |    |     |    |
|----------------|---|------------|------------|-----|---|----|-----|----|
| at_locus.08806 | 5 | 11,852,399 | 11,852,907 | 7   | 0 | 17 | no  | TE |
| at_locus.08807 | 5 | 11,853,099 | 11,856,919 | 68  | 0 | 76 | no  | TE |
| at_locus.08808 | 5 | 11,857,135 | 11,860,264 | 100 | 1 | 96 | no  | TE |
| at_locus.08809 | 5 | 11,860,501 | 11,860,905 | 5   | 0 | 6  | no  | TE |
| at_locus.08810 | 5 | 11,861,274 | 11,861,561 | 5   | 0 | 4  | no  | TE |
| at_locus.08811 | 5 | 11,862,023 | 11,862,530 | 4   | 0 | 13 | no  | TE |
| at_locus.08812 | 5 | 11,862,733 | 11,862,827 | 1   | 0 | 4  | no  | TE |
| at_locus.08813 | 5 | 11,863,167 | 11,866,464 | 63  | 0 | 68 | yes | TE |
| at_locus.08814 | 5 | 11,866,795 | 11,868,399 | 56  | 1 | 42 | no  | TE |
| at_locus.08815 | 5 | 11,868,552 | 11,869,250 | 20  | 0 | 23 | no  | TE |
| at_locus.08816 | 5 | 11,869,504 | 11,869,987 | 4   | 0 | 10 | no  | TE |
| at_locus.08817 | 5 | 11,870,392 | 11,871,026 | 3   | 0 | 10 | no  | TE |
| at_locus.08818 | 5 | 11,871,280 | 11,871,914 | 4   | 0 | 8  | no  | TE |
| at_locus.08819 | 5 | 11,872,168 | 11,873,514 | 4   | 0 | 10 | no  | TE |
| at_locus.08820 | 5 | 11,873,768 | 11,874,402 | 4   | 0 | 10 | no  | TE |
| at_locus.08821 | 5 | 11,874,656 | 11,875,016 | 4   | 0 | 6  | no  | TE |
| at_locus.08822 | 5 | 11,875,274 | 11,875,646 | 2   | 0 | 6  | no  | TE |
| at_locus.08823 | 5 | 11,875,900 | 11,876,534 | 4   | 0 | 9  | no  | TE |
| at_locus.08824 | 5 | 11,876,788 | 11,877,422 | 4   | 0 | 10 | no  | TE |
| at_locus.08825 | 5 | 11,877,676 | 11,878,667 | 2   | 0 | 8  | no  | TE |
| at_locus.08826 | 5 | 11,878,922 | 11,879,023 | 0   | 0 | 4  | no  | TE |
| at_locus.08827 | 5 | 11,879,197 | 11,879,632 | 4   | 0 | 4  | no  | TE |
| at_locus.08828 | 5 | 11,879,886 | 11,880,518 | 4   | 0 | 8  | no  | TE |
| at_locus.08829 | 5 | 11,880,738 | 11,881,051 | 1   | 0 | 4  | no  | TE |
| at_locus.08830 | 5 | 11,881,305 | 11,881,939 | 2   | 0 | 9  | no  | TE |
| at_locus.08831 | 5 | 11,882,193 | 11,882,827 | 1   | 0 | 8  | no  | TE |
| at_locus.08832 | 5 | 11,883,082 | 11,883,716 | 4   | 0 | 10 | no  | TE |
| at_locus.08833 | 5 | 11,883,970 | 11,884,604 | 3   | 0 | 10 | no  | TE |
| at_locus.08834 | 5 | 11,884,858 | 11,885,341 | 4   | 0 | 10 | no  | TE |
| at_locus.08835 | 5 | 11,885,826 | 11,886,559 | 5   | 0 | 6  | no  | TE |
| at_locus.08836 | 5 | 11,886,893 | 11,887,473 | 4   | 0 | 6  | no  | TE |
| at_locus.08837 | 5 | 11,887,701 | 11,888,335 | 4   | 0 | 7  | no  | TE |
| at_locus.08838 | 5 | 11,888,589 | 11,889,223 | 2   | 0 | 9  | no  | TE |
| at_locus.08839 | 5 | 11,889,477 | 11,890,111 | 3   | 0 | 8  | no  | TE |
| at_locus.08840 | 5 | 11,890,365 | 11,891,711 | 11  | 3 | 14 | no  | TE |
| at_locus.08841 | 5 | 11,891,965 | 11,893,310 | 4   | 0 | 10 | no  | TE |
| at_locus.08842 | 5 | 11,893,564 | 11,894,636 | 4   | 0 | 9  | no  | TE |

|                |   |            |            |    |   |    |     |    |
|----------------|---|------------|------------|----|---|----|-----|----|
| at_locus.08843 | 5 | 11,895,158 | 11,895,518 | 4  | 0 | 8  | no  | TE |
| at_locus.08844 | 5 | 11,896,046 | 11,896,406 | 4  | 0 | 8  | no  | TE |
| at_locus.08845 | 5 | 11,896,934 | 11,897,298 | 3  | 0 | 9  | no  | TE |
| at_locus.08846 | 5 | 11,897,822 | 11,898,182 | 4  | 0 | 8  | no  | TE |
| at_locus.08847 | 5 | 11,898,710 | 11,901,216 | 4  | 0 | 10 | no  | TE |
| at_locus.08848 | 5 | 11,901,470 | 11,902,104 | 2  | 0 | 9  | no  | TE |
| at_locus.08849 | 5 | 11,902,358 | 11,903,882 | 4  | 0 | 9  | no  | TE |
| at_locus.08850 | 5 | 11,904,136 | 11,904,770 | 3  | 0 | 9  | no  | TE |
| at_locus.08851 | 5 | 11,905,024 | 11,905,658 | 2  | 0 | 9  | no  | TE |
| at_locus.08852 | 5 | 11,905,912 | 11,906,272 | 4  | 0 | 8  | no  | TE |
| at_locus.08853 | 5 | 11,906,800 | 11,907,434 | 4  | 0 | 9  | no  | TE |
| at_locus.08854 | 5 | 11,907,688 | 11,909,208 | 4  | 0 | 9  | no  | TE |
| at_locus.08855 | 5 | 11,909,462 | 11,910,096 | 2  | 0 | 9  | no  | TE |
| at_locus.08856 | 5 | 11,910,350 | 11,910,984 | 4  | 0 | 10 | no  | TE |
| at_locus.08857 | 5 | 11,911,238 | 11,911,872 | 2  | 0 | 9  | no  | TE |
| at_locus.08858 | 5 | 11,912,206 | 11,912,760 | 4  | 0 | 6  | no  | TE |
| at_locus.08859 | 5 | 11,913,014 | 11,913,497 | 4  | 0 | 10 | no  | TE |
| at_locus.08860 | 5 | 11,913,902 | 11,914,536 | 4  | 0 | 9  | no  | TE |
| at_locus.08861 | 5 | 11,914,967 | 11,915,327 | 2  | 0 | 7  | no  | TE |
| at_locus.08862 | 5 | 11,917,032 | 11,917,345 | 1  | 0 | 4  | no  | TE |
| at_locus.08863 | 5 | 11,917,600 | 11,918,234 | 1  | 0 | 8  | no  | TE |
| at_locus.08864 | 5 | 11,918,927 | 11,919,655 | 3  | 0 | 8  | no  | TE |
| at_locus.08865 | 5 | 11,919,909 | 11,921,760 | 9  | 0 | 26 | no  | TE |
| at_locus.08866 | 5 | 11,922,468 | 11,923,156 | 12 | 0 | 11 | no  | TE |
| at_locus.08867 | 5 | 11,923,563 | 11,924,694 | 13 | 0 | 15 | no  | TE |
| at_locus.08868 | 5 | 11,925,240 | 11,925,750 | 6  | 0 | 7  | no  | TE |
| at_locus.08869 | 5 | 11,925,899 | 11,926,143 | 2  | 0 | 7  | no  | TE |
| at_locus.08870 | 5 | 11,927,471 | 11,927,732 | 6  | 0 | 4  | no  | TE |
| at_locus.08871 | 5 | 11,928,200 | 11,928,299 | 5  | 0 | 2  | yes | TE |
| at_locus.08872 | 5 | 11,929,702 | 11,930,533 | 8  | 0 | 10 | no  | TE |
| at_locus.08873 | 5 | 11,930,692 | 11,930,845 | 1  | 0 | 5  | no  | TE |
| at_locus.08874 | 5 | 11,931,003 | 11,931,668 | 10 | 0 | 15 | no  | TE |
| at_locus.08875 | 5 | 11,931,906 | 11,931,963 | 3  | 0 | 6  | no  | TE |
| at_locus.08876 | 5 | 11,932,246 | 11,933,679 | 12 | 0 | 16 | no  | TE |
| at_locus.08877 | 5 | 11,933,865 | 11,934,155 | 7  | 0 | 4  | no  | TE |
| at_locus.08878 | 5 | 11,934,365 | 11,935,646 | 22 | 0 | 20 | no  | TE |
| at_locus.08879 | 5 | 11,935,982 | 11,936,388 | 1  | 0 | 9  | no  | TE |

|                |   |            |            |    |   |     |     |    |
|----------------|---|------------|------------|----|---|-----|-----|----|
| at_locus.08880 | 5 | 11,939,068 | 11,939,231 | 2  | 0 | 5   | yes | TE |
| at_locus.08881 | 5 | 11,941,806 | 11,942,655 | 18 | 0 | 17  | no  | TE |
| at_locus.08882 | 5 | 11,943,084 | 11,943,312 | 8  | 0 | 11  | no  | TE |
| at_locus.08883 | 5 | 11,943,521 | 11,943,880 | 4  | 0 | 5   | no  | TE |
| at_locus.08884 | 5 | 11,943,976 | 11,944,509 | 4  | 0 | 10  | no  | TE |
| at_locus.08885 | 5 | 11,944,776 | 11,946,155 | 19 | 0 | 13  | no  | TE |
| at_locus.08886 | 5 | 11,946,490 | 11,947,044 | 8  | 0 | 8   | no  | TE |
| at_locus.08887 | 5 | 11,947,251 | 11,947,577 | 1  | 0 | 6   | no  | TE |
| at_locus.08888 | 5 | 11,947,832 | 11,947,933 | 0  | 0 | 4   | no  | TE |
| at_locus.08889 | 5 | 11,948,031 | 11,948,466 | 8  | 0 | 7   | no  | TE |
| at_locus.08890 | 5 | 11,948,801 | 11,949,355 | 7  | 0 | 8   | no  | TE |
| at_locus.08891 | 5 | 11,949,809 | 11,950,244 | 7  | 0 | 7   | no  | TE |
| at_locus.08892 | 5 | 11,950,698 | 11,951,133 | 7  | 0 | 6   | no  | TE |
| at_locus.08893 | 5 | 11,951,340 | 11,951,736 | 4  | 0 | 6   | no  | TE |
| at_locus.08894 | 5 | 11,952,153 | 11,955,072 | 98 | 1 | 83  | no  | TE |
| at_locus.08895 | 5 | 11,955,988 | 11,956,369 | 6  | 0 | 5   | no  | TE |
| at_locus.08896 | 5 | 11,956,831 | 11,961,918 | 92 | 0 | 113 | no  | TE |
| at_locus.08897 | 5 | 11,961,922 | 11,963,341 | 52 | 1 | 38  | no  | TE |
| at_locus.08898 | 5 | 11,963,526 | 11,964,009 | 7  | 0 | 10  | no  | TE |
| at_locus.08899 | 5 | 11,964,415 | 11,964,763 | 4  | 0 | 5   | no  | TE |
| at_locus.08900 | 5 | 11,964,900 | 11,965,049 | 0  | 0 | 5   | no  | TE |
| at_locus.08901 | 5 | 11,965,147 | 11,965,296 | 4  | 0 | 0   | no  | TE |
| at_locus.08902 | 5 | 11,965,713 | 11,966,115 | 7  | 0 | 8   | yes | TE |
| at_locus.08903 | 5 | 11,966,450 | 11,966,853 | 8  | 0 | 7   | no  | TE |
| at_locus.08904 | 5 | 11,967,259 | 11,967,607 | 4  | 0 | 5   | no  | TE |
| at_locus.08905 | 5 | 11,967,792 | 11,968,275 | 2  | 0 | 7   | no  | TE |
| at_locus.08906 | 5 | 11,968,681 | 11,969,164 | 8  | 0 | 10  | no  | TE |
| at_locus.08907 | 5 | 11,969,522 | 11,970,095 | 4  | 0 | 6   | no  | TE |
| at_locus.08908 | 5 | 11,970,280 | 11,970,914 | 8  | 0 | 11  | no  | TE |
| at_locus.08909 | 5 | 11,971,315 | 11,971,558 | 7  | 0 | 6   | no  | TE |
| at_locus.08910 | 5 | 11,971,984 | 11,972,792 | 8  | 0 | 15  | no  | TE |
| at_locus.08911 | 5 | 11,973,369 | 11,973,503 | 12 | 0 | 8   | no  | TE |
| at_locus.08912 | 5 | 11,973,868 | 11,974,214 | 18 | 2 | 35  | no  | TE |
| at_locus.08913 | 5 | 11,974,565 | 11,974,604 | 4  | 0 | 1   | no  |    |
| at_locus.08914 | 5 | 11,975,549 | 11,976,185 | 18 | 1 | 40  | no  | TE |
| at_locus.08915 | 5 | 11,976,439 | 11,976,574 | 12 | 0 | 8   | no  | TE |
| at_locus.08916 | 5 | 11,977,006 | 11,977,462 | 3  | 0 | 7   | no  | TE |

|                |   |            |            |    |   |    |     |    |
|----------------|---|------------|------------|----|---|----|-----|----|
| at_locus.08917 | 5 | 11,977,561 | 11,977,762 | 3  | 0 | 0  | no  | TE |
| at_locus.08918 | 5 | 11,978,024 | 11,978,172 | 16 | 2 | 13 | no  | TE |
| at_locus.08919 | 5 | 11,978,537 | 11,978,883 | 18 | 2 | 35 | no  | TE |
| at_locus.08920 | 5 | 11,979,233 | 11,979,273 | 5  | 0 | 1  | no  |    |
| at_locus.08921 | 5 | 11,980,088 | 11,980,215 | 4  | 0 | 4  | no  | TE |
| at_locus.08922 | 5 | 11,980,444 | 11,981,054 | 14 | 0 | 12 | no  | TE |
| at_locus.08923 | 5 | 11,981,393 | 11,981,461 | 17 | 0 | 12 | no  | TE |
| at_locus.08924 | 5 | 11,981,744 | 11,982,977 | 17 | 0 | 30 | no  | TE |
| at_locus.08925 | 5 | 11,983,175 | 11,983,269 | 4  | 0 | 0  | no  | TE |
| at_locus.08926 | 5 | 11,983,518 | 11,983,899 | 16 | 1 | 16 | no  | TE |
| at_locus.08927 | 5 | 11,984,180 | 11,984,315 | 12 | 0 | 8  | no  | TE |
| at_locus.08928 | 5 | 11,984,533 | 11,985,024 | 8  | 0 | 8  | no  | TE |
| at_locus.08929 | 5 | 11,985,374 | 11,985,509 | 12 | 0 | 8  | no  | TE |
| at_locus.08930 | 5 | 11,985,727 | 11,986,218 | 8  | 0 | 8  | no  | TE |
| at_locus.08931 | 5 | 11,986,568 | 11,986,594 | 6  | 0 | 2  | no  | TE |
| at_locus.08932 | 5 | 11,986,921 | 11,987,324 | 7  | 0 | 7  | no  | TE |
| at_locus.08933 | 5 | 11,987,578 | 11,987,713 | 12 | 0 | 8  | no  | TE |
| at_locus.08934 | 5 | 11,987,931 | 11,988,069 | 12 | 0 | 30 | no  | TE |
| at_locus.08935 | 5 | 11,988,270 | 11,988,312 | 12 | 2 | 7  | no  | TE |
| at_locus.08936 | 5 | 11,988,630 | 11,988,951 | 13 | 1 | 13 | no  | TE |
| at_locus.08937 | 5 | 11,991,119 | 11,991,277 | 3  | 0 | 4  | no  | TE |
| at_locus.08938 | 5 | 11,991,740 | 11,991,974 | 3  | 1 | 6  | no  | TE |
| at_locus.08939 | 5 | 11,992,270 | 11,993,029 | 12 | 3 | 13 | no  | TE |
| at_locus.08940 | 5 | 11,996,242 | 11,996,668 | 4  | 0 | 2  | no  | TE |
| at_locus.08941 | 5 | 11,996,829 | 11,997,011 | 0  | 0 | 4  | no  | TE |
| at_locus.08942 | 5 | 11,998,064 | 11,998,427 | 4  | 0 | 8  | no  | TE |
| at_locus.08943 | 5 | 11,998,494 | 11,998,858 | 4  | 0 | 1  | no  | TE |
| at_locus.08944 | 5 | 11,999,878 | 12,000,070 | 0  | 0 | 5  | yes | TE |
| at_locus.08945 | 5 | 12,003,729 | 12,003,948 | 4  | 0 | 3  | no  | TE |
| at_locus.08946 | 5 | 12,004,873 | 12,005,958 | 15 | 0 | 31 | no  | TE |
| at_locus.08947 | 5 | 12,006,261 | 12,008,619 | 88 | 1 | 63 | yes | TE |
| at_locus.08948 | 5 | 12,010,140 | 12,010,593 | 4  | 0 | 9  | no  | TE |
| at_locus.08949 | 5 | 12,011,382 | 12,011,520 | 4  | 0 | 0  | no  | TE |
| at_locus.08950 | 5 | 12,024,939 | 12,025,997 | 17 | 1 | 24 | no  | TE |
| at_locus.08951 | 5 | 12,026,502 | 12,027,419 | 17 | 1 | 20 | no  | TE |
| at_locus.08952 | 5 | 12,027,637 | 12,028,302 | 14 | 0 | 7  | no  | TE |
| at_locus.08953 | 5 | 12,029,000 | 12,029,080 | 6  | 0 | 3  | no  | TE |

|                |   |            |            |    |    |    |     |    |
|----------------|---|------------|------------|----|----|----|-----|----|
| at_locus.08954 | 5 | 12,030,201 | 12,033,165 | 82 | 4  | 81 | yes | TE |
| at_locus.08955 | 5 | 12,033,617 | 12,033,908 | 13 | 1  | 7  | no  | TE |
| at_locus.08956 | 5 | 12,034,561 | 12,035,633 | 19 | 1  | 23 | no  | TE |
| at_locus.08957 | 5 | 12,036,862 | 12,036,987 | 3  | 0  | 7  | no  | TE |
| at_locus.08958 | 5 | 12,038,314 | 12,038,871 | 6  | 0  | 5  | yes | TE |
| at_locus.08959 | 5 | 12,041,310 | 12,041,677 | 6  | 0  | 8  | yes | TE |
| at_locus.08960 | 5 | 12,042,230 | 12,042,324 | 18 | 33 | 14 | no  |    |
| at_locus.08961 | 5 | 12,042,629 | 12,042,932 | 19 | 61 | 61 | yes |    |
| at_locus.08962 | 5 | 12,043,140 | 12,044,780 | 18 | 0  | 36 | yes | TE |
| at_locus.08963 | 5 | 12,045,115 | 12,045,309 | 7  | 0  | 6  | no  | TE |
| at_locus.08964 | 5 | 12,045,889 | 12,047,489 | 30 | 3  | 38 | no  | TE |
| at_locus.08965 | 5 | 12,047,680 | 12,048,726 | 25 | 1  | 24 | no  | TE |
| at_locus.08966 | 5 | 12,049,158 | 12,050,767 | 35 | 0  | 38 | yes | TE |
| at_locus.08967 | 5 | 12,051,010 | 12,051,159 | 9  | 0  | 2  | no  | TE |
| at_locus.08968 | 5 | 12,051,506 | 12,051,816 | 6  | 0  | 7  | yes | TE |
| at_locus.08969 | 5 | 12,052,712 | 12,053,081 | 4  | 0  | 6  | no  | TE |
| at_locus.08970 | 5 | 12,053,454 | 12,053,651 | 7  | 0  | 4  | no  | TE |
| at_locus.08971 | 5 | 12,054,193 | 12,054,445 | 6  | 0  | 2  | no  | TE |
| at_locus.08972 | 5 | 12,055,874 | 12,056,210 | 5  | 0  | 0  | yes | TE |
| at_locus.08973 | 5 | 12,056,773 | 12,057,111 | 4  | 0  | 5  | yes | TE |
| at_locus.08974 | 5 | 12,057,478 | 12,058,485 | 13 | 1  | 21 | no  | TE |
| at_locus.08975 | 5 | 12,058,762 | 12,060,857 | 24 | 1  | 48 | no  | TE |
| at_locus.08976 | 5 | 12,061,132 | 12,062,424 | 25 | 2  | 22 | no  | TE |
| at_locus.08977 | 5 | 12,062,684 | 12,063,800 | 21 | 2  | 37 | no  | TE |
| at_locus.08978 | 5 | 12,064,055 | 12,064,688 | 18 | 2  | 17 | no  | TE |
| at_locus.08979 | 5 | 12,064,963 | 12,065,045 | 18 | 2  | 14 | no  | TE |
| at_locus.08980 | 5 | 12,065,274 | 12,067,727 | 43 | 2  | 48 | no  | TE |
| at_locus.08981 | 5 | 12,067,930 | 12,068,512 | 10 | 0  | 7  | no  | TE |
| at_locus.08982 | 5 | 12,069,346 | 12,069,449 | 16 | 2  | 30 | no  | TE |
| at_locus.08983 | 5 | 12,069,702 | 12,069,896 | 4  | 0  | 3  | no  | TE |
| at_locus.08984 | 5 | 12,070,655 | 12,074,382 | 28 | 2  | 46 | no  | TE |
| at_locus.08985 | 5 | 12,074,742 | 12,075,229 | 12 | 0  | 10 | no  | TE |
| at_locus.08986 | 5 | 12,075,483 | 12,075,670 | 5  | 0  | 26 | yes | TE |
| at_locus.08987 | 5 | 12,075,922 | 12,078,634 | 24 | 2  | 40 | no  | TE |
| at_locus.08988 | 5 | 12,078,883 | 12,080,683 | 18 | 0  | 37 | yes | TE |
| at_locus.08989 | 5 | 12,080,723 | 12,081,561 | 10 | 0  | 10 | no  | TE |
| at_locus.08990 | 5 | 12,081,955 | 12,082,509 | 7  | 0  | 5  | no  | TE |



|                |   |            |            |    |   |    |     |    |
|----------------|---|------------|------------|----|---|----|-----|----|
| at_locus.08991 | 5 | 12,087,156 | 12,088,201 | 16 | 0 | 32 | yes | TE |
| at_locus.08992 | 5 | 12,088,473 | 12,088,611 | 4  | 0 | 3  | no  | TE |
| at_locus.08993 | 5 | 12,091,262 | 12,091,387 | 0  | 0 | 4  | no  | TE |
| at_locus.08994 | 5 | 12,091,629 | 12,091,703 | 3  | 0 | 7  | yes | TE |
| at_locus.08995 | 5 | 12,108,517 | 12,109,134 | 7  | 0 | 6  | yes | TE |
| at_locus.08996 | 5 | 12,112,764 | 12,112,910 | 4  | 1 | 2  | yes | TE |
| at_locus.08997 | 5 | 12,117,018 | 12,117,186 | 2  | 0 | 6  | no  | TE |
| at_locus.08998 | 5 | 12,117,292 | 12,117,758 | 10 | 0 | 11 | no  | TE |
| at_locus.08999 | 5 | 12,118,064 | 12,118,695 | 4  | 0 | 12 | yes | TE |
| at_locus.09000 | 5 | 12,119,179 | 12,119,554 | 11 | 0 | 11 | no  | TE |
| at_locus.09001 | 5 | 12,119,657 | 12,121,839 | 52 | 4 | 49 | yes | TE |
| at_locus.09002 | 5 | 12,121,998 | 12,122,466 | 7  | 0 | 4  | yes |    |
| at_locus.09003 | 5 | 12,122,651 | 12,122,830 | 8  | 0 | 2  | no  | TE |
| at_locus.09004 | 5 | 12,123,101 | 12,123,375 | 4  | 0 | 4  | no  | TE |
| at_locus.09005 | 5 | 12,124,015 | 12,124,652 | 12 | 0 | 6  | no  | TE |
| at_locus.09006 | 5 | 12,124,678 | 12,125,619 | 11 | 1 | 12 | no  | TE |
| at_locus.09007 | 5 | 12,126,570 | 12,127,180 | 8  | 0 | 5  | yes | TE |
| at_locus.09008 | 5 | 12,127,704 | 12,128,042 | 2  | 0 | 6  | no  | TE |
| at_locus.09009 | 5 | 12,128,257 | 12,128,873 | 8  | 1 | 16 | no  | TE |
| at_locus.09010 | 5 | 12,129,104 | 12,129,428 | 8  | 0 | 11 | no  | TE |
| at_locus.09011 | 5 | 12,130,955 | 12,131,224 | 40 | 0 | 1  | no  | TE |
| at_locus.09012 | 5 | 12,135,724 | 12,136,171 | 3  | 0 | 5  | no  | TE |
| at_locus.09013 | 5 | 12,136,971 | 12,137,318 | 43 | 0 | 1  | no  | TE |
| at_locus.09014 | 5 | 12,140,259 | 12,141,207 | 14 | 0 | 11 | no  | TE |
| at_locus.09015 | 5 | 12,141,975 | 12,144,149 | 40 | 4 | 40 | no  | TE |
| at_locus.09016 | 5 | 12,144,341 | 12,145,724 | 13 | 0 | 14 | yes | TE |
| at_locus.09017 | 5 | 12,146,018 | 12,147,002 | 20 | 0 | 20 | no  | TE |
| at_locus.09018 | 5 | 12,147,295 | 12,147,645 | 2  | 0 | 8  | no  | TE |
| at_locus.09019 | 5 | 12,147,685 | 12,147,997 | 14 | 1 | 7  | no  | TE |
| at_locus.09020 | 5 | 12,148,430 | 12,148,738 | 9  | 0 | 10 | no  | TE |
| at_locus.09021 | 5 | 12,148,883 | 12,151,093 | 51 | 4 | 53 | yes | TE |
| at_locus.09022 | 5 | 12,151,359 | 12,151,699 | 5  | 0 | 2  | yes | TE |
| at_locus.09023 | 5 | 12,151,905 | 12,152,125 | 11 | 0 | 4  | no  | TE |
| at_locus.09024 | 5 | 12,152,440 | 12,152,780 | 4  | 0 | 5  | yes | TE |
| at_locus.09025 | 5 | 12,153,193 | 12,153,858 | 9  | 0 | 5  | yes | TE |
| at_locus.09026 | 5 | 12,154,016 | 12,155,171 | 14 | 1 | 12 | no  | TE |
| at_locus.09027 | 5 | 12,155,504 | 12,156,393 | 18 | 0 | 22 | yes | TE |

|                |   |            |            |    |   |    |     |    |
|----------------|---|------------|------------|----|---|----|-----|----|
| at_locus.09028 | 5 | 12,156,592 | 12,158,312 | 60 | 1 | 42 | no  | TE |
| at_locus.09029 | 5 | 12,158,566 | 12,158,757 | 14 | 0 | 15 | no  | TE |
| at_locus.09030 | 5 | 12,158,989 | 12,161,913 | 63 | 1 | 50 | yes | TE |
| at_locus.09031 | 5 | 12,162,377 | 12,163,610 | 22 | 0 | 33 | yes | TE |
| at_locus.09032 | 5 | 12,164,180 | 12,164,359 | 4  | 0 | 4  | no  | TE |
| at_locus.09033 | 5 | 12,165,336 | 12,168,330 | 65 | 1 | 81 | yes | TE |
| at_locus.09034 | 5 | 12,169,209 | 12,169,328 | 3  | 0 | 8  | yes |    |
| at_locus.09035 | 5 | 12,176,191 | 12,176,278 | 4  | 0 | 1  | no  |    |
| at_locus.09036 | 5 | 12,184,683 | 12,184,977 | 4  | 0 | 1  | yes | TE |
| at_locus.09037 | 5 | 12,187,015 | 12,187,576 | 21 | 0 | 7  | no  | TE |
| at_locus.09038 | 5 | 12,195,819 | 12,196,525 | 4  | 0 | 12 | no  | TE |
| at_locus.09039 | 5 | 12,197,133 | 12,197,633 | 15 | 0 | 15 | yes | TE |
| at_locus.09040 | 5 | 12,197,886 | 12,198,567 | 5  | 0 | 10 | no  | TE |
| at_locus.09041 | 5 | 12,199,618 | 12,200,045 | 14 | 1 | 4  | yes | TE |
| at_locus.09042 | 5 | 12,227,858 | 12,228,042 | 6  | 0 | 0  | no  | TE |
| at_locus.09043 | 5 | 12,228,187 | 12,229,200 | 6  | 1 | 14 | yes | TE |
| at_locus.09044 | 5 | 12,229,494 | 12,230,022 | 11 | 0 | 7  | no  | TE |
| at_locus.09045 | 5 | 12,230,556 | 12,230,806 | 8  | 0 | 9  | no  | TE |
| at_locus.09046 | 5 | 12,231,018 | 12,231,273 | 0  | 0 | 5  | no  | TE |
| at_locus.09047 | 5 | 12,243,296 | 12,243,441 | 4  | 0 | 0  | yes | TE |
| at_locus.09048 | 5 | 12,245,798 | 12,245,885 | 5  | 0 | 2  | no  | TE |
| at_locus.09049 | 5 | 12,257,879 | 12,258,016 | 4  | 0 | 5  | no  | TE |
| at_locus.09050 | 5 | 12,258,283 | 12,258,993 | 2  | 0 | 8  | no  | TE |
| at_locus.09051 | 5 | 12,294,206 | 12,294,684 | 8  | 0 | 2  | yes | TE |
| at_locus.09052 | 5 | 12,296,933 | 12,297,195 | 0  | 0 | 5  | yes | TE |
| at_locus.09053 | 5 | 12,306,299 | 12,306,489 | 4  | 0 | 3  | no  | TE |
| at_locus.09054 | 5 | 12,307,341 | 12,307,476 | 1  | 0 | 4  | no  | TE |
| at_locus.09055 | 5 | 12,308,153 | 12,308,467 | 2  | 0 | 6  | no  | TE |
| at_locus.09056 | 5 | 12,309,977 | 12,311,908 | 24 | 0 | 25 | yes | TE |
| at_locus.09057 | 5 | 12,312,539 | 12,312,731 | 7  | 0 | 8  | no  | TE |
| at_locus.09058 | 5 | 12,313,819 | 12,314,826 | 27 | 0 | 19 | yes | TE |
| at_locus.09059 | 5 | 12,316,046 | 12,316,069 | 4  | 0 | 1  | no  | TE |
| at_locus.09060 | 5 | 12,317,612 | 12,317,768 | 0  | 0 | 5  | no  | TE |
| at_locus.09061 | 5 | 12,334,318 | 12,334,537 | 0  | 0 | 5  | no  | TE |
| at_locus.09062 | 5 | 12,334,752 | 12,334,914 | 6  | 0 | 6  | no  | TE |
| at_locus.09063 | 5 | 12,338,831 | 12,339,040 | 4  | 0 | 1  | yes | TE |
| at_locus.09064 | 5 | 12,339,607 | 12,339,718 | 4  | 0 | 2  | no  | TE |

|                |   |            |            |    |   |    |     |    |
|----------------|---|------------|------------|----|---|----|-----|----|
| at_locus.09065 | 5 | 12,356,095 | 12,358,233 | 24 | 0 | 33 | no  | TE |
| at_locus.09066 | 5 | 12,358,381 | 12,358,795 | 7  | 0 | 4  | yes | TE |
| at_locus.09067 | 5 | 12,359,341 | 12,359,378 | 2  | 0 | 6  | no  | TE |
| at_locus.09068 | 5 | 12,360,123 | 12,360,255 | 4  | 0 | 1  | no  | TE |
| at_locus.09069 | 5 | 12,360,379 | 12,360,606 | 1  | 0 | 4  | no  | TE |
| at_locus.09070 | 5 | 12,360,904 | 12,361,164 | 6  | 0 | 6  | no  | TE |
| at_locus.09071 | 5 | 12,363,836 | 12,364,153 | 3  | 0 | 6  | yes | TE |
| at_locus.09072 | 5 | 12,364,565 | 12,364,649 | 6  | 0 | 0  | no  | TE |
| at_locus.09073 | 5 | 12,365,122 | 12,366,058 | 13 | 1 | 18 | no  | TE |
| at_locus.09074 | 5 | 12,366,252 | 12,367,277 | 20 | 0 | 27 | no  | TE |
| at_locus.09075 | 5 | 12,367,583 | 12,367,818 | 2  | 0 | 5  | yes | TE |
| at_locus.09076 | 5 | 12,369,679 | 12,369,923 | 4  | 0 | 2  | no  | TE |
| at_locus.09077 | 5 | 12,383,137 | 12,383,342 | 1  | 0 | 4  | no  | TE |
| at_locus.09078 | 5 | 12,391,567 | 12,391,668 | 4  | 0 | 0  | yes | TE |
| at_locus.09079 | 5 | 12,399,781 | 12,400,552 | 10 | 0 | 2  | no  | TE |
| at_locus.09080 | 5 | 12,405,121 | 12,405,143 | 4  | 0 | 0  | no  | TE |
| at_locus.09081 | 5 | 12,413,314 | 12,413,638 | 4  | 0 | 1  | yes | TE |
| at_locus.09082 | 5 | 12,413,738 | 12,413,794 | 0  | 0 | 4  | no  | TE |
| at_locus.09083 | 5 | 12,414,160 | 12,414,270 | 4  | 0 | 3  | yes | TE |
| at_locus.09084 | 5 | 12,414,540 | 12,415,937 | 14 | 0 | 22 | yes | TE |
| at_locus.09085 | 5 | 12,417,780 | 12,418,196 | 10 | 0 | 16 | no  | TE |
| at_locus.09086 | 5 | 12,419,245 | 12,419,623 | 5  | 0 | 2  | yes | TE |
| at_locus.09087 | 5 | 12,419,876 | 12,420,566 | 14 | 0 | 7  | no  | TE |
| at_locus.09088 | 5 | 12,425,514 | 12,427,012 | 23 | 0 | 26 | no  | TE |
| at_locus.09089 | 5 | 12,427,221 | 12,427,600 | 4  | 0 | 1  | no  | TE |
| at_locus.09090 | 5 | 12,427,700 | 12,427,849 | 0  | 0 | 6  | no  | TE |
| at_locus.09091 | 5 | 12,428,122 | 12,429,860 | 26 | 0 | 30 | no  | TE |
| at_locus.09092 | 5 | 12,430,190 | 12,430,410 | 15 | 0 | 6  | no  | TE |
| at_locus.09093 | 5 | 12,430,627 | 12,431,006 | 5  | 0 | 2  | no  | TE |
| at_locus.09094 | 5 | 12,431,132 | 12,431,255 | 0  | 0 | 4  | no  | TE |
| at_locus.09095 | 5 | 12,431,528 | 12,431,659 | 4  | 0 | 6  | no  | TE |
| at_locus.09096 | 5 | 12,431,863 | 12,432,058 | 10 | 0 | 5  | no  | TE |
| at_locus.09097 | 5 | 12,432,293 | 12,433,268 | 8  | 0 | 22 | no  | TE |
| at_locus.09098 | 5 | 12,433,639 | 12,433,826 | 13 | 0 | 14 | no  | TE |
| at_locus.09099 | 5 | 12,434,080 | 12,434,608 | 6  | 1 | 7  | no  | TE |
| at_locus.09100 | 5 | 12,434,903 | 12,435,015 | 2  | 0 | 7  | no  | TE |
| at_locus.09101 | 5 | 12,441,481 | 12,441,662 | 12 | 0 | 0  | no  |    |

|                |   |            |            |    |   |    |     |    |
|----------------|---|------------|------------|----|---|----|-----|----|
| at_locus.09102 | 5 | 12,445,196 | 12,445,943 | 17 | 0 | 24 | no  | TE |
| at_locus.09103 | 5 | 12,446,163 | 12,446,785 | 8  | 0 | 4  | no  | TE |
| at_locus.09104 | 5 | 12,446,875 | 12,447,824 | 13 | 1 | 14 | no  | TE |
| at_locus.09105 | 5 | 12,447,975 | 12,448,639 | 12 | 0 | 1  | no  | TE |
| at_locus.09106 | 5 | 12,450,073 | 12,450,328 | 2  | 0 | 9  | no  | TE |
| at_locus.09107 | 5 | 12,450,592 | 12,450,901 | 10 | 0 | 11 | no  | TE |
| at_locus.09108 | 5 | 12,451,332 | 12,453,590 | 38 | 2 | 38 | no  | TE |
| at_locus.09109 | 5 | 12,472,023 | 12,472,202 | 3  | 0 | 8  | no  | TE |
| at_locus.09110 | 5 | 12,477,970 | 12,477,993 | 4  | 0 | 0  | no  | TE |
| at_locus.09111 | 5 | 12,485,120 | 12,485,614 | 5  | 0 | 5  | yes | TE |
| at_locus.09112 | 5 | 12,486,248 | 12,487,503 | 16 | 4 | 28 | yes | TE |
| at_locus.09113 | 5 | 12,487,738 | 12,488,400 | 4  | 1 | 13 | no  | TE |
| at_locus.09114 | 5 | 12,488,870 | 12,489,179 | 8  | 0 | 9  | no  | TE |
| at_locus.09115 | 5 | 12,489,436 | 12,490,172 | 9  | 0 | 14 | no  | TE |
| at_locus.09116 | 5 | 12,492,411 | 12,493,226 | 9  | 0 | 5  | yes | TE |
| at_locus.09117 | 5 | 12,493,379 | 12,493,936 | 15 | 0 | 7  | no  | TE |
| at_locus.09118 | 5 | 12,496,092 | 12,496,258 | 2  | 0 | 4  | yes | TE |
| at_locus.09119 | 5 | 12,497,285 | 12,497,755 | 0  | 0 | 4  | no  | TE |
| at_locus.09120 | 5 | 12,499,270 | 12,499,505 | 6  | 0 | 2  | no  | TE |
| at_locus.09121 | 5 | 12,506,358 | 12,506,540 | 0  | 0 | 4  | no  | TE |
| at_locus.09122 | 5 | 12,506,917 | 12,507,128 | 4  | 0 | 1  | no  | TE |
| at_locus.09123 | 5 | 12,516,019 | 12,516,157 | 4  | 0 | 0  | no  |    |
| at_locus.09124 | 5 | 12,517,959 | 12,518,134 | 4  | 0 | 0  | no  | TE |
| at_locus.09125 | 5 | 12,518,470 | 12,519,754 | 29 | 2 | 37 | no  | TE |
| at_locus.09126 | 5 | 12,519,958 | 12,524,279 | 39 | 0 | 80 | yes | TE |
| at_locus.09127 | 5 | 12,524,969 | 12,525,086 | 4  | 0 | 0  | no  | TE |
| at_locus.09128 | 5 | 12,525,688 | 12,526,071 | 26 | 2 | 7  | no  | TE |
| at_locus.09129 | 5 | 12,534,565 | 12,534,705 | 5  | 0 | 0  | no  | TE |
| at_locus.09130 | 5 | 12,534,953 | 12,535,157 | 4  | 0 | 4  | no  | TE |
| at_locus.09131 | 5 | 12,535,652 | 12,535,862 | 5  | 0 | 5  | yes | TE |
| at_locus.09132 | 5 | 12,536,582 | 12,536,653 | 10 | 0 | 4  | no  | TE |
| at_locus.09133 | 5 | 12,537,130 | 12,537,529 | 8  | 0 | 9  | no  | TE |
| at_locus.09134 | 5 | 12,541,372 | 12,541,574 | 4  | 0 | 4  | no  | TE |
| at_locus.09135 | 5 | 12,544,989 | 12,545,248 | 1  | 0 | 3  | no  | TE |
| at_locus.09136 | 5 | 12,545,567 | 12,545,930 | 1  | 0 | 6  | no  | TE |
| at_locus.09137 | 5 | 12,547,275 | 12,547,562 | 1  | 0 | 5  | no  | TE |
| at_locus.09138 | 5 | 12,547,773 | 12,548,001 | 1  | 0 | 6  | no  | TE |

|                |   |            |            |    |   |    |     |    |
|----------------|---|------------|------------|----|---|----|-----|----|
| at_locus.09139 | 5 | 12,555,334 | 12,555,768 | 13 | 0 | 6  | yes | TE |
| at_locus.09140 | 5 | 12,560,312 | 12,560,658 | 3  | 0 | 5  | no  | TE |
| at_locus.09141 | 5 | 12,583,634 | 12,583,997 | 13 | 0 | 4  | yes | TE |
| at_locus.09142 | 5 | 12,586,368 | 12,586,781 | 36 | 1 | 4  | yes | TE |
| at_locus.09143 | 5 | 12,588,660 | 12,588,755 | 3  | 2 | 4  | no  |    |
| at_locus.09144 | 5 | 12,600,016 | 12,600,095 | 5  | 0 | 2  | no  | TE |
| at_locus.09145 | 5 | 12,600,313 | 12,601,064 | 55 | 1 | 15 | no  | TE |
| at_locus.09146 | 5 | 12,618,686 | 12,618,875 | 5  | 0 | 1  | yes | TE |
| at_locus.09147 | 5 | 12,628,059 | 12,628,945 | 21 | 0 | 11 | yes | TE |
| at_locus.09148 | 5 | 12,632,677 | 12,632,804 | 4  | 0 | 2  | yes | TE |
| at_locus.09149 | 5 | 12,633,264 | 12,633,305 | 3  | 0 | 5  | no  | TE |
| at_locus.09150 | 5 | 12,643,425 | 12,644,018 | 3  | 0 | 11 | no  | TE |
| at_locus.09151 | 5 | 12,644,709 | 12,645,096 | 1  | 0 | 5  | no  | TE |
| at_locus.09152 | 5 | 12,647,103 | 12,647,470 | 4  | 0 | 3  | no  | TE |
| at_locus.09153 | 5 | 12,649,181 | 12,649,465 | 1  | 0 | 6  | no  | TE |
| at_locus.09154 | 5 | 12,652,672 | 12,653,510 | 1  | 0 | 15 | yes | TE |
| at_locus.09155 | 5 | 12,657,954 | 12,658,231 | 2  | 1 | 8  | no  | TE |
| at_locus.09156 | 5 | 12,660,028 | 12,660,057 | 0  | 0 | 4  | no  | TE |
| at_locus.09157 | 5 | 12,660,682 | 12,660,793 | 5  | 0 | 5  | yes | TE |
| at_locus.09158 | 5 | 12,661,162 | 12,661,655 | 5  | 0 | 8  | no  | TE |
| at_locus.09159 | 5 | 12,661,867 | 12,661,955 | 4  | 0 | 2  | no  | TE |
| at_locus.09160 | 5 | 12,662,939 | 12,664,798 | 40 | 3 | 47 | yes | TE |
| at_locus.09161 | 5 | 12,665,893 | 12,666,494 | 6  | 0 | 6  | no  | TE |
| at_locus.09162 | 5 | 12,666,832 | 12,667,953 | 13 | 1 | 17 | no  | TE |
| at_locus.09163 | 5 | 12,685,693 | 12,685,861 | 0  | 0 | 4  | no  | TE |
| at_locus.09164 | 5 | 12,701,633 | 12,702,837 | 6  | 0 | 30 | yes | TE |
| at_locus.09165 | 5 | 12,720,135 | 12,720,273 | 1  | 0 | 4  | no  |    |
| at_locus.09166 | 5 | 12,720,939 | 12,721,327 | 2  | 1 | 6  | yes |    |
| at_locus.09167 | 5 | 12,725,968 | 12,726,000 | 4  | 0 | 0  | no  | TE |
| at_locus.09168 | 5 | 12,728,060 | 12,728,255 | 1  | 0 | 5  | no  | TE |
| at_locus.09169 | 5 | 12,730,516 | 12,730,945 | 1  | 0 | 5  | no  | TE |
| at_locus.09170 | 5 | 12,732,237 | 12,732,369 | 4  | 0 | 1  | no  | TE |
| at_locus.09171 | 5 | 12,732,661 | 12,732,964 | 4  | 0 | 1  | no  | TE |
| at_locus.09172 | 5 | 12,733,629 | 12,733,913 | 0  | 0 | 4  | no  | TE |
| at_locus.09173 | 5 | 12,736,059 | 12,736,272 | 4  | 0 | 7  | no  | TE |
| at_locus.09175 | 5 | 12,757,723 | 12,758,188 | 1  | 0 | 6  | yes | TE |
| at_locus.09176 | 5 | 12,763,874 | 12,765,127 | 26 | 0 | 23 | no  | TE |

|                |   |            |            |     |     |     |     |    |
|----------------|---|------------|------------|-----|-----|-----|-----|----|
| at_locus.09177 | 5 | 12,771,286 | 12,771,401 | 0   | 0   | 5   | yes | TE |
| at_locus.09178 | 5 | 12,776,559 | 12,776,876 | 4   | 0   | 1   | no  | TE |
| at_locus.09179 | 5 | 12,784,043 | 12,784,366 | 5   | 0   | 2   | yes | TE |
| at_locus.09180 | 5 | 12,793,918 | 12,794,198 | 0   | 0   | 6   | no  | TE |
| at_locus.09181 | 5 | 12,808,334 | 12,808,449 | 4   | 0   | 5   | yes | TE |
| at_locus.09182 | 5 | 12,819,386 | 12,819,422 | 0   | 0   | 4   | no  | TE |
| at_locus.09183 | 5 | 12,821,751 | 12,821,862 | 0   | 0   | 5   | no  |    |
| at_locus.09184 | 5 | 12,824,469 | 12,844,566 | 276 | 294 | 277 | no  |    |
| at_locus.09185 | 5 | 12,845,736 | 12,846,166 | 85  | 24  | 91  | no  |    |
| at_locus.09186 | 5 | 12,850,391 | 12,851,223 | 164 | 173 | 159 | no  |    |
| at_locus.09187 | 5 | 12,861,355 | 12,861,391 | 0   | 0   | 4   | no  | TE |
| at_locus.09188 | 5 | 12,863,720 | 12,863,831 | 0   | 0   | 5   | no  |    |
| at_locus.09189 | 5 | 12,866,438 | 12,887,623 | 276 | 294 | 279 | no  |    |
| at_locus.09190 | 5 | 12,887,831 | 12,887,935 | 4   | 1   | 1   | no  |    |
| at_locus.09191 | 5 | 12,888,788 | 12,888,953 | 2   | 0   | 6   | no  |    |
| at_locus.09192 | 5 | 12,890,218 | 12,890,295 | 0   | 0   | 5   | no  |    |
| at_locus.09193 | 5 | 12,890,503 | 12,890,688 | 4   | 1   | 4   | no  |    |
| at_locus.09194 | 5 | 12,891,112 | 12,891,189 | 0   | 0   | 5   | no  |    |
| at_locus.09195 | 5 | 12,892,736 | 12,892,975 | 4   | 1   | 6   | no  |    |
| at_locus.09196 | 5 | 12,894,528 | 12,894,713 | 4   | 1   | 4   | no  |    |
| at_locus.09197 | 5 | 12,894,975 | 12,895,079 | 4   | 1   | 1   | no  |    |
| at_locus.09198 | 5 | 12,895,422 | 12,895,607 | 4   | 1   | 4   | no  |    |
| at_locus.09199 | 5 | 12,896,825 | 12,896,990 | 2   | 0   | 6   | no  |    |
| at_locus.09200 | 5 | 12,898,255 | 12,898,332 | 0   | 0   | 5   | no  |    |
| at_locus.09201 | 5 | 12,898,540 | 12,898,725 | 4   | 1   | 4   | no  |    |
| at_locus.09202 | 5 | 12,899,149 | 12,899,226 | 0   | 0   | 5   | no  |    |
| at_locus.09203 | 5 | 12,900,772 | 12,901,011 | 4   | 1   | 6   | no  |    |
| at_locus.09204 | 5 | 12,902,276 | 12,902,353 | 0   | 0   | 5   | no  |    |
| at_locus.09205 | 5 | 12,903,528 | 12,903,639 | 2   | 0   | 4   | no  |    |
| at_locus.09206 | 5 | 12,903,902 | 12,904,006 | 4   | 1   | 0   | no  |    |
| at_locus.09207 | 5 | 12,904,511 | 12,904,588 | 0   | 0   | 5   | no  |    |
| at_locus.09208 | 5 | 12,913,619 | 12,913,885 | 6   | 0   | 4   | yes | TE |
| at_locus.09209 | 5 | 12,935,558 | 12,935,669 | 2   | 0   | 4   | no  |    |
| at_locus.09210 | 5 | 12,936,005 | 12,936,171 | 2   | 0   | 6   | no  |    |
| at_locus.09211 | 5 | 12,942,978 | 12,943,041 | 0   | 0   | 5   | no  | TE |
| at_locus.09212 | 5 | 12,943,603 | 12,943,670 | 8   | 0   | 5   | no  | TE |
| at_locus.09213 | 5 | 12,948,117 | 12,948,599 | 13  | 0   | 6   | no  | TE |

|                |   |            |            |    |   |    |     |    |
|----------------|---|------------|------------|----|---|----|-----|----|
| at_locus.09214 | 5 | 12,952,720 | 12,953,120 | 5  | 0 | 4  | no  | TE |
| at_locus.09215 | 5 | 12,957,376 | 12,957,723 | 1  | 0 | 8  | no  | TE |
| at_locus.09216 | 5 | 12,965,421 | 12,965,443 | 0  | 0 | 4  | no  | TE |
| at_locus.09217 | 5 | 13,014,264 | 13,015,428 | 25 | 0 | 13 | yes | TE |
| at_locus.09218 | 5 | 13,015,912 | 13,016,192 | 0  | 0 | 6  | no  | TE |
| at_locus.09219 | 5 | 13,018,341 | 13,018,791 | 9  | 0 | 17 | yes | TE |
| at_locus.09220 | 5 | 13,020,198 | 13,021,406 | 18 | 0 | 10 | no  | TE |
| at_locus.09221 | 5 | 13,021,467 | 13,021,638 | 2  | 0 | 9  | no  | TE |
| at_locus.09222 | 5 | 13,027,352 | 13,027,766 | 6  | 0 | 9  | no  | TE |
| at_locus.09223 | 5 | 13,028,001 | 13,028,168 | 7  | 0 | 6  | no  | TE |
| at_locus.09224 | 5 | 13,028,385 | 13,028,571 | 4  | 0 | 1  | no  | TE |
| at_locus.09225 | 5 | 13,029,288 | 13,030,072 | 25 | 0 | 18 | no  | TE |
| at_locus.09226 | 5 | 13,033,905 | 13,033,921 | 3  | 8 | 0  | no  | TE |
| at_locus.09227 | 5 | 13,038,259 | 13,038,625 | 6  | 0 | 0  | yes | TE |
| at_locus.09228 | 5 | 13,039,096 | 13,039,766 | 13 | 0 | 13 | yes | TE |
| at_locus.09229 | 5 | 13,040,404 | 13,040,763 | 0  | 0 | 4  | no  | TE |
| at_locus.09230 | 5 | 13,043,440 | 13,043,487 | 0  | 0 | 4  | no  | TE |
| at_locus.09231 | 5 | 13,045,342 | 13,045,784 | 6  | 0 | 2  | no  | TE |
| at_locus.09232 | 5 | 13,047,741 | 13,047,880 | 0  | 0 | 4  | no  | TE |
| at_locus.09233 | 5 | 13,048,332 | 13,048,690 | 10 | 0 | 15 | yes | TE |
| at_locus.09234 | 5 | 13,051,534 | 13,052,075 | 4  | 0 | 7  | yes | TE |
| at_locus.09235 | 5 | 13,054,018 | 13,054,440 | 4  | 0 | 2  | no  | TE |
| at_locus.09236 | 5 | 13,058,565 | 13,059,097 | 6  | 2 | 12 | no  | TE |
| at_locus.09237 | 5 | 13,062,509 | 13,063,403 | 6  | 0 | 16 | no  | TE |
| at_locus.09238 | 5 | 13,063,618 | 13,063,931 | 0  | 0 | 4  | no  | TE |
| at_locus.09239 | 5 | 13,071,005 | 13,071,205 | 5  | 0 | 1  | yes |    |
| at_locus.09240 | 5 | 13,071,971 | 13,072,235 | 5  | 0 | 2  | yes | TE |
| at_locus.09241 | 5 | 13,072,770 | 13,072,998 | 4  | 0 | 1  | yes | TE |
| at_locus.09242 | 5 | 13,073,487 | 13,074,083 | 19 | 2 | 21 | yes |    |
| at_locus.09243 | 5 | 13,077,512 | 13,077,770 | 5  | 0 | 1  | yes |    |
| at_locus.09244 | 5 | 13,086,914 | 13,086,945 | 5  | 0 | 1  | no  | TE |
| at_locus.09245 | 5 | 13,087,170 | 13,087,555 | 33 | 2 | 7  | yes | TE |
| at_locus.09246 | 5 | 13,087,589 | 13,087,647 | 4  | 0 | 0  | no  | TE |
| at_locus.09247 | 5 | 13,088,356 | 13,090,085 | 8  | 0 | 32 | yes | TE |
| at_locus.09248 | 5 | 13,090,419 | 13,090,720 | 1  | 0 | 4  | no  | TE |
| at_locus.09249 | 5 | 13,090,841 | 13,091,861 | 15 | 0 | 22 | no  | TE |
| at_locus.09250 | 5 | 13,093,106 | 13,093,240 | 4  | 0 | 3  | no  | TE |

|                |   |            |            |    |   |    |     |    |
|----------------|---|------------|------------|----|---|----|-----|----|
| at_locus.09251 | 5 | 13,093,813 | 13,093,844 | 5  | 0 | 2  | no  | TE |
| at_locus.09252 | 5 | 13,113,575 | 13,115,461 | 12 | 0 | 35 | yes | TE |
| at_locus.09253 | 5 | 13,129,128 | 13,129,178 | 8  | 0 | 0  | yes |    |
| at_locus.09254 | 5 | 13,136,331 | 13,136,530 | 1  | 0 | 6  | no  | TE |
| at_locus.09255 | 5 | 13,142,417 | 13,142,440 | 4  | 0 | 0  | no  | TE |
| at_locus.09256 | 5 | 13,145,275 | 13,145,457 | 0  | 0 | 4  | no  | TE |
| at_locus.09257 | 5 | 13,150,648 | 13,150,697 | 7  | 0 | 0  | no  |    |
| at_locus.09258 | 5 | 13,151,275 | 13,152,840 | 15 | 1 | 27 | yes | TE |
| at_locus.09259 | 5 | 13,160,536 | 13,160,569 | 4  | 0 | 0  | no  | TE |
| at_locus.09260 | 5 | 13,160,809 | 13,161,483 | 8  | 0 | 6  | no  | TE |
| at_locus.09261 | 5 | 13,163,705 | 13,163,976 | 5  | 0 | 0  | no  | TE |
| at_locus.09262 | 5 | 13,164,246 | 13,164,459 | 2  | 0 | 5  | no  | TE |
| at_locus.09263 | 5 | 13,165,810 | 13,166,062 | 5  | 0 | 1  | no  | TE |
| at_locus.09264 | 5 | 13,182,306 | 13,182,326 | 1  | 0 | 4  | yes | TE |
| at_locus.09265 | 5 | 13,215,013 | 13,215,305 | 6  | 0 | 1  | no  |    |
| at_locus.09266 | 5 | 13,216,959 | 13,217,251 | 4  | 2 | 1  | no  |    |
| at_locus.09267 | 5 | 13,218,907 | 13,219,199 | 5  | 2 | 1  | no  |    |
| at_locus.09268 | 5 | 13,220,855 | 13,221,147 | 5  | 0 | 1  | no  |    |
| at_locus.09269 | 5 | 13,222,320 | 13,222,676 | 21 | 0 | 23 | no  | TE |
| at_locus.09270 | 5 | 13,222,889 | 13,223,474 | 9  | 0 | 4  | no  | TE |
| at_locus.09271 | 5 | 13,227,322 | 13,227,358 | 1  | 0 | 5  | no  | TE |
| at_locus.09272 | 5 | 13,227,781 | 13,228,279 | 5  | 0 | 1  | no  | TE |
| at_locus.09273 | 5 | 13,230,442 | 13,230,869 | 3  | 0 | 1  | no  | TE |
| at_locus.09274 | 5 | 13,231,247 | 13,231,421 | 7  | 0 | 0  | no  | TE |
| at_locus.09275 | 5 | 13,232,425 | 13,232,545 | 5  | 0 | 3  | no  | TE |
| at_locus.09276 | 5 | 13,235,582 | 13,235,724 | 4  | 0 | 4  | no  | TE |
| at_locus.09277 | 5 | 13,236,274 | 13,237,346 | 12 | 1 | 26 | yes | TE |
| at_locus.09278 | 5 | 13,237,463 | 13,238,071 | 13 | 0 | 6  | yes | TE |
| at_locus.09279 | 5 | 13,238,551 | 13,238,840 | 4  | 2 | 1  | no  |    |
| at_locus.09280 | 5 | 13,240,494 | 13,240,631 | 4  | 0 | 0  | no  |    |
| at_locus.09281 | 5 | 13,242,676 | 13,243,098 | 7  | 0 | 2  | no  | TE |
| at_locus.09282 | 5 | 13,248,967 | 13,249,301 | 23 | 0 | 0  | no  | TE |
| at_locus.09283 | 5 | 13,258,015 | 13,258,216 | 9  | 0 | 3  | yes |    |
| at_locus.09284 | 5 | 13,276,350 | 13,277,095 | 5  | 0 | 19 | no  | TE |
| at_locus.09285 | 5 | 13,277,405 | 13,277,824 | 7  | 0 | 5  | no  | TE |
| at_locus.09286 | 5 | 13,278,322 | 13,280,019 | 66 | 0 | 55 | no  | TE |
| at_locus.09287 | 5 | 13,280,266 | 13,280,711 | 17 | 0 | 15 | no  | TE |



|                |   |            |            |    |   |    |     |    |
|----------------|---|------------|------------|----|---|----|-----|----|
| at_locus.09288 | 5 | 13,280,781 | 13,281,856 | 19 | 0 | 30 | no  | TE |
| at_locus.09289 | 5 | 13,285,259 | 13,285,968 | 7  | 0 | 14 | yes | TE |
| at_locus.09290 | 5 | 13,286,531 | 13,286,901 | 3  | 0 | 4  | yes | TE |
| at_locus.09291 | 5 | 13,287,138 | 13,289,740 | 75 | 0 | 77 | no  | TE |
| at_locus.09292 | 5 | 13,290,704 | 13,290,963 | 4  | 0 | 1  | yes | TE |
| at_locus.09293 | 5 | 13,291,542 | 13,291,787 | 1  | 0 | 5  | no  | TE |
| at_locus.09294 | 5 | 13,293,236 | 13,293,765 | 0  | 1 | 7  | no  | TE |
| at_locus.09295 | 5 | 13,293,971 | 13,294,801 | 1  | 0 | 10 | no  | TE |
| at_locus.09296 | 5 | 13,295,343 | 13,296,254 | 8  | 0 | 6  | no  | TE |
| at_locus.09297 | 5 | 13,296,893 | 13,297,136 | 4  | 0 | 2  | yes | TE |
| at_locus.09298 | 5 | 13,297,426 | 13,297,546 | 4  | 0 | 1  | no  | TE |
| at_locus.09299 | 5 | 13,298,017 | 13,298,480 | 4  | 0 | 8  | no  | TE |
| at_locus.09300 | 5 | 13,298,564 | 13,299,296 | 4  | 0 | 9  | no  | TE |
| at_locus.09301 | 5 | 13,299,760 | 13,299,880 | 6  | 0 | 8  | no  | TE |
| at_locus.09302 | 5 | 13,300,088 | 13,300,734 | 4  | 0 | 11 | yes | TE |
| at_locus.09303 | 5 | 13,300,889 | 13,301,277 | 19 | 0 | 1  | yes | TE |
| at_locus.09304 | 5 | 13,302,594 | 13,302,820 | 3  | 0 | 4  | no  | TE |
| at_locus.09305 | 5 | 13,304,800 | 13,305,161 | 0  | 0 | 6  | no  | TE |
| at_locus.09306 | 5 | 13,315,965 | 13,316,332 | 3  | 0 | 5  | no  | TE |
| at_locus.09307 | 5 | 13,317,442 | 13,317,704 | 10 | 0 | 7  | no  | TE |
| at_locus.09308 | 5 | 13,319,855 | 13,320,022 | 0  | 0 | 5  | no  | TE |
| at_locus.09309 | 5 | 13,321,762 | 13,321,852 | 0  | 0 | 4  | no  | TE |
| at_locus.09310 | 5 | 13,325,799 | 13,325,875 | 9  | 0 | 6  | no  | TE |
| at_locus.09311 | 5 | 13,330,995 | 13,331,433 | 5  | 0 | 1  | yes | TE |
| at_locus.09312 | 5 | 13,334,512 | 13,334,815 | 5  | 0 | 2  | no  | TE |
| at_locus.09313 | 5 | 13,334,842 | 13,335,514 | 5  | 0 | 14 | no  | TE |
| at_locus.09314 | 5 | 13,335,716 | 13,335,753 | 2  | 0 | 5  | no  | TE |
| at_locus.09315 | 5 | 13,336,026 | 13,336,197 | 4  | 0 | 1  | no  | TE |
| at_locus.09316 | 5 | 13,336,480 | 13,336,647 | 10 | 0 | 6  | no  | TE |
| at_locus.09317 | 5 | 13,336,900 | 13,339,721 | 41 | 2 | 41 | yes | TE |
| at_locus.09318 | 5 | 13,340,919 | 13,341,158 | 3  | 0 | 7  | yes | TE |
| at_locus.09319 | 5 | 13,341,793 | 13,342,213 | 4  | 0 | 9  | no  | TE |
| at_locus.09320 | 5 | 13,343,029 | 13,343,187 | 0  | 0 | 6  | no  | TE |
| at_locus.09321 | 5 | 13,344,000 | 13,344,685 | 13 | 0 | 18 | yes | TE |
| at_locus.09322 | 5 | 13,345,571 | 13,345,742 | 4  | 0 | 1  | no  | TE |
| at_locus.09323 | 5 | 13,349,547 | 13,349,609 | 6  | 0 | 1  | no  |    |
| at_locus.09324 | 5 | 13,356,320 | 13,356,484 | 10 | 0 | 1  | no  |    |

|                |   |            |            |    |   |    |     |    |
|----------------|---|------------|------------|----|---|----|-----|----|
| at_locus.09325 | 5 | 13,361,567 | 13,361,965 | 4  | 0 | 0  | yes | TE |
| at_locus.09326 | 5 | 13,374,662 | 13,374,739 | 6  | 0 | 0  | yes |    |
| at_locus.09327 | 5 | 13,388,499 | 13,388,747 | 11 | 2 | 5  | no  | TE |
| at_locus.09328 | 5 | 13,388,940 | 13,389,352 | 7  | 0 | 3  | yes | TE |
| at_locus.09329 | 5 | 13,390,824 | 13,392,241 | 14 | 0 | 27 | no  | TE |
| at_locus.09330 | 5 | 13,392,846 | 13,394,003 | 1  | 0 | 22 | yes | TE |
| at_locus.09331 | 5 | 13,394,301 | 13,394,399 | 1  | 0 | 8  | no  | TE |
| at_locus.09332 | 5 | 13,394,640 | 13,394,760 | 0  | 0 | 4  | no  | TE |
| at_locus.09333 | 5 | 13,395,037 | 13,395,066 | 2  | 0 | 16 | no  | TE |
| at_locus.09334 | 5 | 13,395,436 | 13,395,626 | 4  | 0 | 7  | no  | TE |
| at_locus.09335 | 5 | 13,395,968 | 13,396,303 | 7  | 0 | 1  | no  | TE |
| at_locus.09336 | 5 | 13,413,283 | 13,413,546 | 3  | 0 | 5  | no  | TE |
| at_locus.09337 | 5 | 13,414,216 | 13,414,452 | 4  | 0 | 0  | no  | TE |
| at_locus.09338 | 5 | 13,415,463 | 13,416,187 | 1  | 0 | 9  | yes | TE |
| at_locus.09339 | 5 | 13,418,094 | 13,418,257 | 3  | 0 | 5  | yes | TE |
| at_locus.09340 | 5 | 13,418,853 | 13,419,143 | 6  | 0 | 0  | no  | TE |
| at_locus.09341 | 5 | 13,419,866 | 13,420,170 | 6  | 0 | 3  | yes | TE |
| at_locus.09342 | 5 | 13,420,382 | 13,420,795 | 4  | 0 | 5  | yes | TE |
| at_locus.09343 | 5 | 13,422,195 | 13,422,813 | 6  | 0 | 7  | no  | TE |
| at_locus.09344 | 5 | 13,422,885 | 13,423,074 | 0  | 0 | 4  | no  | TE |
| at_locus.09345 | 5 | 13,424,717 | 13,425,496 | 4  | 0 | 10 | yes | TE |
| at_locus.09346 | 5 | 13,435,051 | 13,435,467 | 5  | 0 | 0  | no  | TE |
| at_locus.09347 | 5 | 13,457,106 | 13,457,308 | 4  | 0 | 0  | yes |    |
| at_locus.09348 | 5 | 13,466,040 | 13,466,546 | 3  | 0 | 0  | no  |    |
| at_locus.09349 | 5 | 13,471,442 | 13,471,602 | 1  | 0 | 4  | no  |    |
| at_locus.09350 | 5 | 13,484,244 | 13,484,463 | 0  | 0 | 4  | yes |    |
| at_locus.09351 | 5 | 13,522,076 | 13,522,363 | 4  | 0 | 8  | yes | TE |
| at_locus.09352 | 5 | 13,523,033 | 13,523,221 | 4  | 0 | 1  | no  | TE |
| at_locus.09353 | 5 | 13,524,885 | 13,525,778 | 16 | 1 | 35 | yes | TE |
| at_locus.09354 | 5 | 13,526,736 | 13,527,204 | 1  | 0 | 4  | no  | TE |
| at_locus.09355 | 5 | 13,532,272 | 13,532,332 | 4  | 0 | 0  | no  | TE |
| at_locus.09356 | 5 | 13,535,155 | 13,535,565 | 8  | 0 | 1  | yes |    |
| at_locus.09357 | 5 | 13,535,796 | 13,535,959 | 5  | 0 | 1  | yes |    |
| at_locus.09358 | 5 | 13,551,669 | 13,551,920 | 6  | 0 | 1  | yes | TE |
| at_locus.09359 | 5 | 13,553,275 | 13,553,815 | 13 | 0 | 10 | no  | TE |
| at_locus.09360 | 5 | 13,558,012 | 13,558,383 | 1  | 0 | 5  | no  | TE |
| at_locus.09361 | 5 | 13,558,879 | 13,559,295 | 11 | 0 | 12 | no  | TE |

|                |   |            |            |    |    |    |     |    |
|----------------|---|------------|------------|----|----|----|-----|----|
| at_locus.09362 | 5 | 13,559,668 | 13,560,096 | 0  | 0  | 5  | no  | TE |
| at_locus.09363 | 5 | 13,562,639 | 13,562,747 | 6  | 0  | 0  | yes | TE |
| at_locus.09364 | 5 | 13,564,341 | 13,564,410 | 7  | 0  | 0  | no  | TE |
| at_locus.09365 | 5 | 13,564,675 | 13,564,828 | 6  | 0  | 1  | no  | TE |
| at_locus.09366 | 5 | 13,565,195 | 13,566,252 | 19 | 0  | 4  | yes | TE |
| at_locus.09367 | 5 | 13,587,039 | 13,587,410 | 0  | 0  | 4  | yes | TE |
| at_locus.09368 | 5 | 13,588,860 | 13,589,532 | 5  | 0  | 5  | yes | TE |
| at_locus.09369 | 5 | 13,600,456 | 13,600,798 | 6  | 0  | 2  | yes | TE |
| at_locus.09370 | 5 | 13,624,856 | 13,624,973 | 4  | 0  | 0  | yes | TE |
| at_locus.09371 | 5 | 13,625,641 | 13,625,788 | 5  | 0  | 1  | no  |    |
| at_locus.09372 | 5 | 13,629,038 | 13,629,154 | 23 | 80 | 42 | yes |    |
| at_locus.09373 | 5 | 13,637,128 | 13,638,245 | 30 | 0  | 6  | no  | TE |
| at_locus.09374 | 5 | 13,638,637 | 13,638,790 | 8  | 0  | 0  | yes | TE |
| at_locus.09375 | 5 | 13,639,056 | 13,639,130 | 25 | 0  | 2  | no  | TE |
| at_locus.09376 | 5 | 13,649,464 | 13,649,772 | 13 | 0  | 0  | yes | TE |
| at_locus.09377 | 5 | 13,649,899 | 13,650,653 | 58 | 2  | 6  | yes | TE |
| at_locus.09378 | 5 | 13,669,365 | 13,669,497 | 0  | 0  | 5  | yes |    |
| at_locus.09379 | 5 | 13,673,666 | 13,674,187 | 29 | 2  | 4  | yes | TE |
| at_locus.09380 | 5 | 13,695,851 | 13,696,108 | 4  | 0  | 1  | no  | TE |
| at_locus.09381 | 5 | 13,698,202 | 13,698,833 | 6  | 0  | 5  | yes |    |
| at_locus.09382 | 5 | 13,699,777 | 13,700,044 | 9  | 0  | 1  | yes |    |
| at_locus.09383 | 5 | 13,701,833 | 13,702,010 | 11 | 0  | 4  | yes |    |
| at_locus.09384 | 5 | 13,706,550 | 13,706,693 | 2  | 0  | 6  | yes |    |
| at_locus.09385 | 5 | 13,707,206 | 13,708,040 | 14 | 0  | 13 | yes | TE |
| at_locus.09386 | 5 | 13,708,633 | 13,709,111 | 13 | 0  | 11 | yes |    |
| at_locus.09387 | 5 | 13,720,635 | 13,720,676 | 7  | 0  | 0  | yes | TE |
| at_locus.09388 | 5 | 13,726,127 | 13,726,159 | 6  | 0  | 0  | yes |    |
| at_locus.09389 | 5 | 13,731,116 | 13,731,604 | 10 | 0  | 2  | yes |    |
| at_locus.09390 | 5 | 13,733,299 | 13,733,547 | 0  | 0  | 4  | yes | TE |
| at_locus.09391 | 5 | 13,735,154 | 13,735,247 | 4  | 0  | 0  | yes | TE |
| at_locus.09392 | 5 | 13,743,195 | 13,743,228 | 9  | 0  | 0  | yes |    |
| at_locus.09393 | 5 | 13,750,260 | 13,750,289 | 4  | 0  | 0  | no  | TE |
| at_locus.09394 | 5 | 13,785,864 | 13,785,951 | 6  | 1  | 0  | yes |    |
| at_locus.09395 | 5 | 13,791,022 | 13,791,175 | 6  | 0  | 0  | yes |    |
| at_locus.09396 | 5 | 13,792,279 | 13,792,733 | 32 | 1  | 1  | yes |    |
| at_locus.09397 | 5 | 13,803,879 | 13,803,922 | 7  | 0  | 0  | yes |    |
| at_locus.09398 | 5 | 13,804,226 | 13,804,432 | 21 | 0  | 1  | no  |    |

|                |   |            |            |    |   |    |     |    |
|----------------|---|------------|------------|----|---|----|-----|----|
| at_locus.09399 | 5 | 13,809,439 | 13,809,820 | 7  | 0 | 1  | yes | TE |
| at_locus.09400 | 5 | 13,820,315 | 13,820,865 | 17 | 0 | 6  | yes | TE |
| at_locus.09401 | 5 | 13,828,519 | 13,828,836 | 8  | 0 | 0  | yes | TE |
| at_locus.09402 | 5 | 13,830,650 | 13,830,830 | 4  | 0 | 2  | no  | TE |
| at_locus.09403 | 5 | 13,831,134 | 13,831,219 | 4  | 0 | 1  | no  | TE |
| at_locus.09404 | 5 | 13,833,186 | 13,833,707 | 13 | 0 | 5  | yes | TE |
| at_locus.09405 | 5 | 13,833,990 | 13,834,813 | 17 | 0 | 12 | yes | TE |
| at_locus.09406 | 5 | 13,836,690 | 13,836,835 | 11 | 1 | 1  | yes |    |
| at_locus.09407 | 5 | 13,837,396 | 13,837,498 | 6  | 0 | 0  | yes |    |
| at_locus.09408 | 5 | 13,844,322 | 13,844,441 | 4  | 0 | 1  | yes |    |
| at_locus.09409 | 5 | 13,845,609 | 13,846,147 | 11 | 0 | 2  | yes | TE |
| at_locus.09410 | 5 | 13,846,428 | 13,846,510 | 10 | 0 | 0  | no  | TE |
| at_locus.09411 | 5 | 13,853,824 | 13,854,999 | 10 | 0 | 23 | yes | TE |
| at_locus.09412 | 5 | 13,858,011 | 13,858,159 | 0  | 0 | 5  | no  | TE |
| at_locus.09413 | 5 | 13,858,405 | 13,858,532 | 5  | 0 | 1  | no  | TE |
| at_locus.09414 | 5 | 13,858,921 | 13,859,324 | 3  | 0 | 8  | no  | TE |
| at_locus.09415 | 5 | 13,860,526 | 13,860,804 | 0  | 0 | 5  | no  | TE |
| at_locus.09416 | 5 | 13,861,893 | 13,862,091 | 0  | 0 | 4  | no  | TE |
| at_locus.09417 | 5 | 13,863,457 | 13,863,961 | 5  | 0 | 6  | yes | TE |
| at_locus.09418 | 5 | 13,864,324 | 13,864,511 | 2  | 0 | 5  | no  | TE |
| at_locus.09419 | 5 | 13,865,116 | 13,865,438 | 4  | 0 | 6  | yes | TE |
| at_locus.09420 | 5 | 13,865,810 | 13,866,273 | 5  | 0 | 11 | no  | TE |
| at_locus.09421 | 5 | 13,866,540 | 13,867,089 | 3  | 0 | 10 | no  | TE |
| at_locus.09422 | 5 | 13,867,552 | 13,867,884 | 6  | 0 | 7  | yes | TE |
| at_locus.09423 | 5 | 13,868,074 | 13,868,367 | 4  | 0 | 11 | yes | TE |
| at_locus.09424 | 5 | 13,868,681 | 13,869,044 | 19 | 1 | 1  | yes | TE |
| at_locus.09425 | 5 | 13,872,428 | 13,872,664 | 7  | 0 | 0  | yes | TE |
| at_locus.09426 | 5 | 13,878,274 | 13,878,389 | 4  | 0 | 0  | yes |    |
| at_locus.09427 | 5 | 13,880,103 | 13,880,266 | 6  | 1 | 3  | yes |    |
| at_locus.09428 | 5 | 13,909,395 | 13,909,938 | 43 | 0 | 1  | yes | TE |
| at_locus.09429 | 5 | 13,935,025 | 13,935,164 | 11 | 2 | 0  | no  | TE |
| at_locus.09430 | 5 | 13,935,796 | 13,936,022 | 10 | 0 | 0  | no  | TE |
| at_locus.09431 | 5 | 13,974,215 | 13,974,299 | 0  | 6 | 0  | yes |    |
| at_locus.09432 | 5 | 13,977,909 | 13,978,107 | 4  | 3 | 0  | no  | TE |
| at_locus.09433 | 5 | 13,981,534 | 13,981,759 | 5  | 0 | 4  | no  | TE |
| at_locus.09434 | 5 | 13,984,212 | 13,984,399 | 0  | 2 | 5  | no  | TE |
| at_locus.09435 | 5 | 13,986,244 | 13,986,292 | 0  | 0 | 4  | yes |    |

|                |   |            |            |    |   |    |     |    |
|----------------|---|------------|------------|----|---|----|-----|----|
| at_locus.09436 | 5 | 13,994,855 | 13,995,028 | 4  | 0 | 0  | no  | TE |
| at_locus.09437 | 5 | 13,999,356 | 13,999,398 | 8  | 0 | 0  | yes | TE |
| at_locus.09438 | 5 | 13,999,912 | 14,000,153 | 8  | 2 | 0  | yes | TE |
| at_locus.09439 | 5 | 14,000,633 | 14,000,901 | 15 | 1 | 1  | no  | TE |
| at_locus.09440 | 5 | 14,012,481 | 14,012,555 | 4  | 0 | 5  | no  | TE |
| at_locus.09441 | 5 | 14,014,536 | 14,015,134 | 1  | 1 | 6  | no  | TE |
| at_locus.09442 | 5 | 14,017,277 | 14,017,351 | 4  | 0 | 5  | no  | TE |
| at_locus.09443 | 5 | 14,020,114 | 14,020,170 | 24 | 0 | 2  | no  | TE |
| at_locus.09444 | 5 | 14,020,456 | 14,020,602 | 5  | 0 | 1  | no  | TE |
| at_locus.09445 | 5 | 14,020,984 | 14,021,467 | 7  | 0 | 3  | yes | TE |
| at_locus.09446 | 5 | 14,021,952 | 14,021,980 | 4  | 0 | 0  | no  | TE |
| at_locus.09447 | 5 | 14,032,010 | 14,032,065 | 4  | 0 | 0  | yes |    |
| at_locus.09448 | 5 | 14,035,409 | 14,035,546 | 8  | 0 | 2  | no  | TE |
| at_locus.09449 | 5 | 14,039,727 | 14,040,193 | 9  | 2 | 0  | no  | TE |
| at_locus.09450 | 5 | 14,040,606 | 14,040,724 | 4  | 0 | 0  | no  | TE |
| at_locus.09451 | 5 | 14,054,030 | 14,054,070 | 0  | 0 | 4  | no  | TE |
| at_locus.09452 | 5 | 14,055,747 | 14,056,065 | 2  | 0 | 4  | no  | TE |
| at_locus.09453 | 5 | 14,056,483 | 14,056,635 | 5  | 0 | 0  | no  | TE |
| at_locus.09454 | 5 | 14,062,515 | 14,062,977 | 2  | 0 | 5  | yes |    |
| at_locus.09455 | 5 | 14,063,637 | 14,063,798 | 4  | 0 | 0  | yes |    |
| at_locus.09456 | 5 | 14,064,055 | 14,064,361 | 3  | 0 | 9  | yes |    |
| at_locus.09457 | 5 | 14,067,939 | 14,068,044 | 6  | 0 | 4  | no  |    |
| at_locus.09458 | 5 | 14,070,097 | 14,070,547 | 7  | 0 | 5  | yes |    |
| at_locus.09459 | 5 | 14,072,395 | 14,073,136 | 11 | 0 | 2  | yes |    |
| at_locus.09460 | 5 | 14,073,457 | 14,074,141 | 20 | 0 | 14 | yes | TE |
| at_locus.09461 | 5 | 14,076,315 | 14,076,584 | 6  | 0 | 1  | yes | TE |
| at_locus.09462 | 5 | 14,077,100 | 14,077,458 | 5  | 0 | 1  | yes |    |
| at_locus.09463 | 5 | 14,079,546 | 14,079,578 | 4  | 0 | 0  | no  |    |
| at_locus.09464 | 5 | 14,079,915 | 14,080,169 | 4  | 0 | 2  | yes |    |
| at_locus.09465 | 5 | 14,092,940 | 14,093,003 | 4  | 0 | 1  | yes | TE |
| at_locus.09466 | 5 | 14,094,467 | 14,094,521 | 0  | 0 | 4  | yes |    |
| at_locus.09467 | 5 | 14,097,320 | 14,097,530 | 14 | 0 | 0  | no  | TE |
| at_locus.09468 | 5 | 14,098,116 | 14,098,251 | 25 | 0 | 0  | no  | TE |
| at_locus.09469 | 5 | 14,098,672 | 14,098,841 | 8  | 0 | 0  | no  | TE |
| at_locus.09470 | 5 | 14,099,243 | 14,099,351 | 5  | 2 | 0  | no  | TE |
| at_locus.09471 | 5 | 14,099,980 | 14,100,065 | 16 | 0 | 0  | no  | TE |
| at_locus.09472 | 5 | 14,113,054 | 14,113,271 | 6  | 0 | 0  | no  | TE |

|                |   |            |            |    |     |    |     |    |
|----------------|---|------------|------------|----|-----|----|-----|----|
| at_locus.09473 | 5 | 14,114,154 | 14,114,307 | 4  | 0   | 0  | no  | TE |
| at_locus.09474 | 5 | 14,120,899 | 14,121,436 | 49 | 0   | 0  | no  | TE |
| at_locus.09475 | 5 | 14,140,950 | 14,141,313 | 46 | 0   | 0  | yes | TE |
| at_locus.09476 | 5 | 14,166,557 | 14,167,281 | 53 | 2   | 0  | yes | TE |
| at_locus.09477 | 5 | 14,167,509 | 14,167,821 | 10 | 2   | 0  | no  | TE |
| at_locus.09478 | 5 | 14,168,483 | 14,168,558 | 6  | 0   | 0  | no  | TE |
| at_locus.09479 | 5 | 14,169,041 | 14,169,561 | 6  | 0   | 0  | yes |    |
| at_locus.09480 | 5 | 14,170,473 | 14,170,559 | 11 | 0   | 0  | no  | TE |
| at_locus.09481 | 5 | 14,170,835 | 14,171,055 | 1  | 0   | 2  | no  | TE |
| at_locus.09482 | 5 | 14,171,129 | 14,171,698 | 30 | 1   | 4  | no  | TE |
| at_locus.09483 | 5 | 14,175,321 | 14,175,746 | 4  | 1   | 2  | yes | TE |
| at_locus.09484 | 5 | 14,176,716 | 14,177,178 | 0  | 0   | 4  | no  | TE |
| at_locus.09485 | 5 | 14,181,474 | 14,181,710 | 0  | 0   | 4  | no  | TE |
| at_locus.09486 | 5 | 14,182,084 | 14,182,774 | 6  | 0   | 0  | no  | TE |
| at_locus.09487 | 5 | 14,183,654 | 14,184,008 | 8  | 0   | 7  | no  | TE |
| at_locus.09488 | 5 | 14,184,235 | 14,184,592 | 4  | 0   | 1  | no  | TE |
| at_locus.09489 | 5 | 14,185,305 | 14,185,775 | 4  | 0   | 1  | no  | TE |
| at_locus.09490 | 5 | 14,192,028 | 14,192,615 | 7  | 0   | 4  | no  | TE |
| at_locus.09491 | 5 | 14,193,271 | 14,193,637 | 8  | 0   | 2  | no  | TE |
| at_locus.09492 | 5 | 14,196,735 | 14,197,324 | 13 | 1   | 12 | no  | TE |
| at_locus.09493 | 5 | 14,198,828 | 14,199,015 | 4  | 0   | 2  | no  | TE |
| at_locus.09494 | 5 | 14,206,519 | 14,206,787 | 21 | 0   | 0  | yes | TE |
| at_locus.09495 | 5 | 14,206,842 | 14,207,117 | 0  | 0   | 2  | no  | TE |
| at_locus.09496 | 5 | 14,207,306 | 14,207,478 | 62 | 2   | 4  | no  | TE |
| at_locus.09497 | 5 | 14,228,816 | 14,228,905 | 7  | 0   | 0  | no  | TE |
| at_locus.09498 | 5 | 14,229,319 | 14,229,371 | 5  | 0   | 0  | yes | TE |
| at_locus.09499 | 5 | 14,233,504 | 14,233,538 | 17 | 0   | 0  | no  | TE |
| at_locus.09500 | 5 | 14,239,126 | 14,239,198 | 4  | 0   | 0  | yes | TE |
| at_locus.09501 | 5 | 14,257,435 | 14,257,520 | 12 | 0   | 0  | yes |    |
| at_locus.09502 | 5 | 14,259,433 | 14,259,541 | 7  | 0   | 0  | yes | TE |
| at_locus.09503 | 5 | 14,270,578 | 14,270,884 | 87 | 198 | 73 | yes |    |
| at_locus.09504 | 5 | 14,273,599 | 14,274,046 | 0  | 0   | 5  | yes |    |
| at_locus.09505 | 5 | 14,286,671 | 14,286,985 | 5  | 0   | 0  | yes | TE |
| at_locus.09506 | 5 | 14,312,123 | 14,312,198 | 6  | 0   | 0  | yes | TE |
| at_locus.09507 | 5 | 14,312,353 | 14,312,536 | 1  | 7   | 0  | no  |    |
| at_locus.09508 | 5 | 14,318,249 | 14,318,598 | 12 | 0   | 2  | yes |    |
| at_locus.09509 | 5 | 14,319,242 | 14,319,311 | 4  | 0   | 0  | yes |    |

|                |   |            |            |     |   |     |     |    |
|----------------|---|------------|------------|-----|---|-----|-----|----|
| at_locus.09510 | 5 | 14,329,105 | 14,329,379 | 14  | 0 | 1   | yes | TE |
| at_locus.09511 | 5 | 14,331,300 | 14,331,557 | 11  | 0 | 5   | yes |    |
| at_locus.09512 | 5 | 14,332,204 | 14,333,324 | 142 | 2 | 103 | yes |    |
| at_locus.09513 | 5 | 14,333,712 | 14,334,040 | 24  | 0 | 11  | yes |    |
| at_locus.09514 | 5 | 14,334,349 | 14,334,479 | 2   | 0 | 4   | yes |    |
| at_locus.09515 | 5 | 14,337,563 | 14,337,960 | 6   | 0 | 0   | yes |    |
| at_locus.09516 | 5 | 14,338,308 | 14,338,506 | 6   | 0 | 0   | yes |    |
| at_locus.09517 | 5 | 14,341,951 | 14,342,229 | 25  | 0 | 6   | no  |    |
| at_locus.09518 | 5 | 14,344,141 | 14,344,386 | 13  | 0 | 1   | yes |    |
| at_locus.09519 | 5 | 14,346,338 | 14,346,616 | 25  | 0 | 6   | no  |    |
| at_locus.09520 | 5 | 14,348,526 | 14,348,804 | 25  | 0 | 6   | no  |    |
| at_locus.09521 | 5 | 14,350,713 | 14,351,000 | 26  | 0 | 6   | no  |    |
| at_locus.09522 | 5 | 14,352,908 | 14,353,195 | 23  | 0 | 5   | no  |    |
| at_locus.09523 | 5 | 14,355,105 | 14,355,392 | 26  | 0 | 6   | no  |    |
| at_locus.09524 | 5 | 14,357,302 | 14,357,589 | 26  | 0 | 6   | no  |    |
| at_locus.09525 | 5 | 14,359,497 | 14,359,784 | 26  | 0 | 6   | no  |    |
| at_locus.09526 | 5 | 14,361,692 | 14,361,979 | 26  | 0 | 6   | no  |    |
| at_locus.09527 | 5 | 14,363,887 | 14,364,174 | 26  | 0 | 6   | no  |    |
| at_locus.09528 | 5 | 14,366,082 | 14,366,369 | 26  | 0 | 6   | no  |    |
| at_locus.09529 | 5 | 14,368,277 | 14,368,564 | 26  | 0 | 6   | no  |    |
| at_locus.09530 | 5 | 14,370,473 | 14,370,760 | 26  | 0 | 6   | no  |    |
| at_locus.09531 | 5 | 14,372,670 | 14,372,957 | 26  | 0 | 6   | no  |    |
| at_locus.09532 | 5 | 14,374,866 | 14,375,153 | 26  | 0 | 6   | no  |    |
| at_locus.09533 | 5 | 14,377,063 | 14,377,350 | 26  | 0 | 6   | no  |    |
| at_locus.09534 | 5 | 14,379,260 | 14,379,547 | 26  | 0 | 6   | no  |    |
| at_locus.09535 | 5 | 14,381,457 | 14,381,744 | 26  | 0 | 6   | no  |    |
| at_locus.09536 | 5 | 14,383,654 | 14,383,899 | 28  | 0 | 2   | no  |    |
| at_locus.09537 | 5 | 14,385,956 | 14,386,139 | 21  | 0 | 5   | no  |    |
| at_locus.09538 | 5 | 14,388,158 | 14,388,341 | 24  | 0 | 6   | no  |    |
| at_locus.09539 | 5 | 14,390,248 | 14,390,485 | 26  | 0 | 2   | no  |    |
| at_locus.09540 | 5 | 14,392,602 | 14,392,728 | 23  | 0 | 6   | no  |    |
| at_locus.09541 | 5 | 14,394,634 | 14,394,879 | 27  | 0 | 2   | no  |    |
| at_locus.09542 | 5 | 14,399,785 | 14,399,997 | 0   | 0 | 3   | no  | TE |
| at_locus.09543 | 5 | 14,401,117 | 14,401,405 | 26  | 0 | 6   | no  |    |
| at_locus.09544 | 5 | 14,403,312 | 14,403,557 | 26  | 0 | 5   | no  |    |
| at_locus.09545 | 5 | 14,405,512 | 14,405,750 | 6   | 0 | 1   | no  |    |
| at_locus.09546 | 5 | 14,407,669 | 14,407,914 | 6   | 0 | 1   | no  |    |

|                |   |            |            |    |   |    |    |    |
|----------------|---|------------|------------|----|---|----|----|----|
| at_locus.09547 | 5 | 14,409,859 | 14,410,146 | 21 | 0 | 6  | no |    |
| at_locus.09548 | 5 | 14,412,375 | 14,412,563 | 10 | 0 | 0  | no | TE |
| at_locus.09549 | 5 | 14,412,965 | 14,413,061 | 4  | 0 | 0  | no | TE |
| at_locus.09550 | 5 | 14,413,800 | 14,413,835 | 4  | 0 | 0  | no | TE |
| at_locus.09551 | 5 | 14,415,827 | 14,415,858 | 6  | 0 | 0  | no | TE |
| at_locus.09552 | 5 | 14,426,812 | 14,427,290 | 9  | 1 | 2  | no | TE |
| at_locus.09553 | 5 | 14,427,950 | 14,428,506 | 18 | 0 | 12 | no | TE |
| at_locus.09554 | 5 | 14,429,082 | 14,430,176 | 18 | 0 | 8  | no | TE |
| at_locus.09555 | 5 | 14,430,803 | 14,431,670 | 16 | 3 | 10 | no | TE |
| at_locus.09556 | 5 | 14,451,466 | 14,451,552 | 4  | 0 | 0  | no | TE |
| at_locus.09557 | 5 | 14,460,373 | 14,460,752 | 26 | 1 | 1  | no | TE |
| at_locus.09558 | 5 | 14,460,896 | 14,461,351 | 5  | 0 | 14 | no | TE |
| at_locus.09559 | 5 | 14,461,537 | 14,461,818 | 5  | 0 | 1  | no | TE |
| at_locus.09560 | 5 | 14,462,268 | 14,462,881 | 2  | 0 | 14 | no | TE |
| at_locus.09561 | 5 | 14,463,148 | 14,463,515 | 5  | 0 | 10 | no | TE |
| at_locus.09562 | 5 | 14,463,900 | 14,465,875 | 22 | 0 | 28 | no | TE |
| at_locus.09563 | 5 | 14,466,968 | 14,467,213 | 6  | 0 | 1  | no |    |
| at_locus.09564 | 5 | 14,469,158 | 14,469,445 | 21 | 0 | 6  | no |    |
| at_locus.09565 | 5 | 14,471,674 | 14,471,862 | 10 | 0 | 0  | no | TE |
| at_locus.09566 | 5 | 14,472,264 | 14,472,360 | 4  | 0 | 0  | no | TE |
| at_locus.09567 | 5 | 14,473,099 | 14,473,134 | 4  | 0 | 0  | no | TE |
| at_locus.09568 | 5 | 14,475,126 | 14,475,157 | 6  | 0 | 0  | no | TE |
| at_locus.09569 | 5 | 14,486,112 | 14,486,590 | 9  | 1 | 2  | no | TE |
| at_locus.09570 | 5 | 14,487,250 | 14,487,806 | 18 | 0 | 12 | no | TE |
| at_locus.09571 | 5 | 14,488,382 | 14,489,476 | 18 | 0 | 8  | no | TE |
| at_locus.09572 | 5 | 14,490,103 | 14,490,970 | 16 | 3 | 10 | no | TE |
| at_locus.09573 | 5 | 14,510,766 | 14,510,852 | 4  | 0 | 0  | no | TE |
| at_locus.09574 | 5 | 14,519,673 | 14,520,052 | 26 | 1 | 1  | no | TE |
| at_locus.09575 | 5 | 14,520,196 | 14,520,651 | 5  | 0 | 14 | no | TE |
| at_locus.09576 | 5 | 14,520,837 | 14,521,118 | 5  | 0 | 1  | no | TE |
| at_locus.09577 | 5 | 14,521,568 | 14,522,181 | 2  | 0 | 14 | no | TE |
| at_locus.09578 | 5 | 14,522,448 | 14,522,815 | 5  | 0 | 10 | no | TE |
| at_locus.09579 | 5 | 14,523,200 | 14,525,175 | 22 | 0 | 28 | no | TE |
| at_locus.09580 | 5 | 14,526,539 | 14,527,410 | 3  | 0 | 12 | no | TE |
| at_locus.09581 | 5 | 14,527,724 | 14,528,296 | 5  | 1 | 6  | no | TE |
| at_locus.09582 | 5 | 14,529,327 | 14,529,902 | 5  | 0 | 8  | no | TE |
| at_locus.09583 | 5 | 14,530,291 | 14,530,838 | 8  | 0 | 7  | no | TE |



|                |   |            |            |    |   |    |     |    |
|----------------|---|------------|------------|----|---|----|-----|----|
| at_locus.09584 | 5 | 14,531,084 | 14,531,134 | 2  | 0 | 4  | no  | TE |
| at_locus.09585 | 5 | 14,531,426 | 14,531,768 | 4  | 0 | 1  | yes | TE |
| at_locus.09586 | 5 | 14,533,069 | 14,533,750 | 10 | 0 | 6  | no  | TE |
| at_locus.09587 | 5 | 14,533,809 | 14,534,738 | 20 | 1 | 26 | no  | TE |
| at_locus.09588 | 5 | 14,541,033 | 14,541,175 | 1  | 1 | 5  | no  | TE |
| at_locus.09589 | 5 | 14,541,466 | 14,542,902 | 20 | 0 | 12 | yes | TE |
| at_locus.09590 | 5 | 14,563,884 | 14,563,944 | 5  | 0 | 0  | yes |    |
| at_locus.09591 | 5 | 14,570,709 | 14,570,916 | 6  | 0 | 0  | yes | TE |
| at_locus.09592 | 5 | 14,572,535 | 14,572,565 | 4  | 0 | 0  | no  |    |
| at_locus.09593 | 5 | 14,573,513 | 14,573,601 | 5  | 0 | 0  | yes |    |
| at_locus.09594 | 5 | 14,578,209 | 14,578,434 | 4  | 0 | 0  | yes |    |
| at_locus.09595 | 5 | 14,590,729 | 14,591,262 | 5  | 0 | 4  | yes | TE |
| at_locus.09596 | 5 | 14,591,702 | 14,592,031 | 0  | 0 | 6  | yes | TE |
| at_locus.09597 | 5 | 14,597,369 | 14,597,436 | 4  | 0 | 0  | no  | TE |
| at_locus.09598 | 5 | 14,597,867 | 14,598,416 | 3  | 0 | 3  | yes | TE |
| at_locus.09599 | 5 | 14,604,299 | 14,605,131 | 9  | 0 | 1  | yes | TE |
| at_locus.09600 | 5 | 14,605,355 | 14,605,618 | 7  | 0 | 2  | no  | TE |
| at_locus.09601 | 5 | 14,611,906 | 14,612,013 | 5  | 0 | 0  | yes | TE |
| at_locus.09602 | 5 | 14,620,898 | 14,620,958 | 5  | 0 | 0  | yes | TE |
| at_locus.09603 | 5 | 14,627,566 | 14,628,077 | 14 | 2 | 1  | yes | TE |
| at_locus.09604 | 5 | 14,628,507 | 14,629,026 | 10 | 1 | 3  | no  | TE |
| at_locus.09605 | 5 | 14,642,958 | 14,643,416 | 7  | 0 | 3  | yes | TE |
| at_locus.09606 | 5 | 14,643,628 | 14,643,743 | 4  | 0 | 1  | no  | TE |
| at_locus.09607 | 5 | 14,644,237 | 14,644,484 | 5  | 0 | 0  | yes | TE |
| at_locus.09608 | 5 | 14,672,373 | 14,672,705 | 11 | 1 | 10 | yes |    |
| at_locus.09609 | 5 | 14,672,909 | 14,673,206 | 1  | 0 | 5  | yes |    |
| at_locus.09610 | 5 | 14,676,366 | 14,676,394 | 16 | 0 | 2  | yes | TE |
| at_locus.09611 | 5 | 14,697,789 | 14,697,923 | 0  | 0 | 6  | yes | TE |
| at_locus.09612 | 5 | 14,729,315 | 14,729,352 | 5  | 0 | 0  | yes |    |
| at_locus.09613 | 5 | 14,749,943 | 14,749,992 | 9  | 0 | 0  | no  | TE |
| at_locus.09614 | 5 | 14,762,869 | 14,762,906 | 16 | 1 | 1  | yes |    |
| at_locus.09615 | 5 | 14,771,588 | 14,771,751 | 6  | 0 | 0  | yes |    |
| at_locus.09616 | 5 | 14,774,727 | 14,774,752 | 4  | 0 | 0  | yes |    |
| at_locus.09617 | 5 | 14,777,146 | 14,777,706 | 43 | 0 | 1  | yes | TE |
| at_locus.09618 | 5 | 14,778,328 | 14,778,394 | 8  | 0 | 0  | no  | TE |
| at_locus.09619 | 5 | 14,793,701 | 14,793,902 | 7  | 0 | 0  | yes |    |
| at_locus.09620 | 5 | 14,803,277 | 14,803,352 | 5  | 0 | 1  | yes | TE |

|                |   |            |            |    |   |    |     |    |
|----------------|---|------------|------------|----|---|----|-----|----|
| at_locus.09621 | 5 | 14,817,135 | 14,817,224 | 1  | 0 | 4  | yes |    |
| at_locus.09622 | 5 | 14,820,203 | 14,820,562 | 6  | 0 | 1  | yes |    |
| at_locus.09623 | 5 | 14,827,405 | 14,828,053 | 48 | 1 | 0  | yes | TE |
| at_locus.09624 | 5 | 14,843,579 | 14,843,877 | 12 | 0 | 8  | no  | TE |
| at_locus.09625 | 5 | 14,844,486 | 14,844,943 | 2  | 0 | 5  | no  | TE |
| at_locus.09626 | 5 | 14,845,360 | 14,845,830 | 0  | 0 | 5  | no  | TE |
| at_locus.09627 | 5 | 14,845,892 | 14,846,292 | 4  | 0 | 2  | no  | TE |
| at_locus.09628 | 5 | 14,847,212 | 14,847,338 | 7  | 0 | 0  | yes | TE |
| at_locus.09629 | 5 | 14,847,694 | 14,848,064 | 4  | 0 | 7  | no  | TE |
| at_locus.09630 | 5 | 14,848,992 | 14,849,228 | 6  | 0 | 1  | no  | TE |
| at_locus.09631 | 5 | 14,849,698 | 14,850,377 | 4  | 1 | 8  | yes | TE |
| at_locus.09632 | 5 | 14,851,181 | 14,851,456 | 7  | 0 | 1  | yes | TE |
| at_locus.09633 | 5 | 14,863,914 | 14,863,988 | 25 | 0 | 2  | no  | TE |
| at_locus.09634 | 5 | 14,864,253 | 14,864,406 | 6  | 0 | 1  | no  | TE |
| at_locus.09635 | 5 | 14,864,900 | 14,864,981 | 0  | 0 | 4  | yes | TE |
| at_locus.09636 | 5 | 14,865,087 | 14,865,292 | 13 | 0 | 2  | no  | TE |
| at_locus.09637 | 5 | 14,865,552 | 14,865,931 | 8  | 0 | 0  | no  | TE |
| at_locus.09638 | 5 | 14,866,454 | 14,866,610 | 4  | 0 | 0  | yes | TE |
| at_locus.09639 | 5 | 14,866,621 | 14,866,882 | 0  | 0 | 6  | yes | TE |
| at_locus.09640 | 5 | 14,867,759 | 14,867,947 | 8  | 1 | 0  | yes |    |
| at_locus.09642 | 5 | 14,889,563 | 14,889,921 | 8  | 0 | 7  | yes |    |
| at_locus.09643 | 5 | 14,890,465 | 14,891,061 | 4  | 0 | 0  | yes | TE |
| at_locus.09644 | 5 | 14,897,337 | 14,898,041 | 44 | 0 | 1  | yes | TE |
| at_locus.09645 | 5 | 14,913,757 | 14,913,921 | 15 | 0 | 0  | yes |    |
| at_locus.09646 | 5 | 14,943,720 | 14,943,863 | 8  | 0 | 0  | yes |    |
| at_locus.09647 | 5 | 14,954,387 | 14,954,755 | 9  | 0 | 4  | yes |    |
| at_locus.09648 | 5 | 14,964,229 | 14,964,334 | 9  | 0 | 1  | yes | TE |
| at_locus.09649 | 5 | 14,973,380 | 14,973,536 | 5  | 0 | 1  | no  | TE |
| at_locus.09650 | 5 | 14,979,346 | 14,979,729 | 15 | 0 | 0  | no  | TE |
| at_locus.09651 | 5 | 14,980,006 | 14,980,608 | 13 | 0 | 3  | no  | TE |
| at_locus.09652 | 5 | 14,980,896 | 14,980,930 | 4  | 0 | 0  | no  | TE |
| at_locus.09653 | 5 | 14,982,036 | 14,982,828 | 7  | 0 | 11 | no  | TE |
| at_locus.09654 | 5 | 14,982,855 | 14,983,018 | 6  | 0 | 0  | no  | TE |
| at_locus.09655 | 5 | 14,983,472 | 14,984,104 | 5  | 0 | 13 | no  | TE |
| at_locus.09656 | 5 | 15,002,077 | 15,002,542 | 7  | 0 | 2  | yes |    |
| at_locus.09657 | 5 | 15,011,705 | 15,011,779 | 9  | 0 | 0  | no  | TE |
| at_locus.09658 | 5 | 15,012,055 | 15,012,251 | 5  | 0 | 1  | yes | TE |

|                |   |            |            |    |   |    |     |    |
|----------------|---|------------|------------|----|---|----|-----|----|
| at_locus.09659 | 5 | 15,020,620 | 15,020,809 | 23 | 0 | 0  | yes |    |
| at_locus.09660 | 5 | 15,021,113 | 15,021,160 | 4  | 0 | 0  | yes |    |
| at_locus.09661 | 5 | 15,031,587 | 15,032,518 | 21 | 1 | 5  | no  | TE |
| at_locus.09662 | 5 | 15,035,698 | 15,035,799 | 4  | 0 | 0  | yes |    |
| at_locus.09663 | 5 | 15,041,293 | 15,041,770 | 0  | 6 | 1  | yes |    |
| at_locus.09664 | 5 | 15,042,066 | 15,042,195 | 0  | 3 | 0  | no  |    |
| at_locus.09665 | 5 | 15,048,146 | 15,048,372 | 20 | 0 | 0  | no  | TE |
| at_locus.09666 | 5 | 15,058,482 | 15,058,876 | 16 | 0 | 13 | yes |    |
| at_locus.09667 | 5 | 15,059,366 | 15,060,181 | 80 | 3 | 2  | no  | TE |
| at_locus.09668 | 5 | 15,060,406 | 15,060,658 | 14 | 1 | 0  | no  | TE |
| at_locus.09669 | 5 | 15,065,487 | 15,065,616 | 20 | 1 | 0  | yes |    |
| at_locus.09670 | 5 | 15,070,116 | 15,070,201 | 5  | 0 | 1  | yes |    |
| at_locus.09671 | 5 | 15,093,650 | 15,093,675 | 8  | 0 | 0  | no  | TE |
| at_locus.09672 | 5 | 15,094,350 | 15,094,595 | 7  | 1 | 6  | yes | TE |
| at_locus.09673 | 5 | 15,118,757 | 15,119,061 | 11 | 0 | 0  | no  |    |
| at_locus.09674 | 5 | 15,123,080 | 15,123,450 | 7  | 0 | 5  | no  | TE |
| at_locus.09675 | 5 | 15,123,781 | 15,123,914 | 4  | 0 | 0  | no  | TE |
| at_locus.09676 | 5 | 15,131,602 | 15,131,699 | 4  | 0 | 1  | yes |    |
| at_locus.09677 | 5 | 15,158,111 | 15,158,512 | 16 | 0 | 2  | yes |    |
| at_locus.09678 | 5 | 15,179,487 | 15,179,790 | 8  | 0 | 0  | no  | TE |
| at_locus.09679 | 5 | 15,180,137 | 15,180,513 | 19 | 0 | 1  | no  | TE |
| at_locus.09680 | 5 | 15,200,479 | 15,200,578 | 15 | 0 | 0  | yes | TE |
| at_locus.09681 | 5 | 15,201,637 | 15,201,804 | 42 | 2 | 5  | no  | TE |
| at_locus.09682 | 5 | 15,213,786 | 15,214,010 | 14 | 0 | 0  | yes |    |
| at_locus.09683 | 5 | 15,222,591 | 15,224,252 | 21 | 0 | 13 | yes | TE |
| at_locus.09684 | 5 | 15,230,180 | 15,230,438 | 4  | 0 | 1  | yes |    |
| at_locus.09685 | 5 | 15,249,000 | 15,249,139 | 6  | 0 | 3  | no  |    |
| at_locus.09686 | 5 | 15,276,979 | 15,277,111 | 7  | 0 | 11 | yes |    |
| at_locus.09687 | 5 | 15,285,055 | 15,285,384 | 26 | 1 | 6  | no  | TE |
| at_locus.09688 | 5 | 15,304,751 | 15,304,836 | 4  | 0 | 2  | yes |    |
| at_locus.09689 | 5 | 15,318,885 | 15,319,658 | 31 | 0 | 10 | no  | TE |
| at_locus.09690 | 5 | 15,351,422 | 15,352,032 | 10 | 0 | 6  | yes |    |
| at_locus.09691 | 5 | 15,356,821 | 15,357,130 | 4  | 0 | 2  | yes |    |
| at_locus.09692 | 5 | 15,357,575 | 15,357,967 | 13 | 0 | 9  | yes |    |
| at_locus.09693 | 5 | 15,358,956 | 15,359,221 | 11 | 0 | 1  | yes | TE |
| at_locus.09694 | 5 | 15,359,698 | 15,359,926 | 10 | 0 | 0  | no  | TE |
| at_locus.09695 | 5 | 15,367,435 | 15,367,722 | 11 | 0 | 0  | yes |    |

|                |   |            |            |    |   |    |     |    |
|----------------|---|------------|------------|----|---|----|-----|----|
| at_locus.09696 | 5 | 15,372,199 | 15,372,252 | 0  | 0 | 5  | yes | TE |
| at_locus.09697 | 5 | 15,376,380 | 15,376,550 | 6  | 0 | 3  | yes | TE |
| at_locus.09698 | 5 | 15,394,836 | 15,394,936 | 5  | 2 | 0  | no  |    |
| at_locus.09699 | 5 | 15,398,538 | 15,398,829 | 4  | 4 | 0  | yes |    |
| at_locus.09700 | 5 | 15,401,685 | 15,401,785 | 5  | 2 | 0  | no  |    |
| at_locus.09701 | 5 | 15,401,991 | 15,402,251 | 0  | 4 | 1  | yes |    |
| at_locus.09702 | 5 | 15,403,280 | 15,404,106 | 12 | 0 | 6  | yes | TE |
| at_locus.09703 | 5 | 15,418,670 | 15,418,790 | 4  | 0 | 3  | yes | TE |
| at_locus.09704 | 5 | 15,425,419 | 15,425,795 | 15 | 1 | 14 | yes |    |
| at_locus.09705 | 5 | 15,449,104 | 15,449,256 | 20 | 0 | 1  | yes | TE |
| at_locus.09706 | 5 | 15,449,766 | 15,449,939 | 14 | 0 | 0  | yes | TE |
| at_locus.09707 | 5 | 15,501,989 | 15,502,392 | 8  | 0 | 9  | yes |    |
| at_locus.09708 | 5 | 15,508,088 | 15,509,638 | 46 | 3 | 16 | no  | TE |
| at_locus.09709 | 5 | 15,509,907 | 15,512,379 | 42 | 0 | 65 | no  | TE |
| at_locus.09710 | 5 | 15,512,553 | 15,515,810 | 62 | 2 | 73 | yes | TE |
| at_locus.09711 | 5 | 15,525,037 | 15,525,104 | 4  | 0 | 0  | yes | TE |
| at_locus.09712 | 5 | 15,552,456 | 15,552,572 | 6  | 0 | 0  | no  | TE |
| at_locus.09713 | 5 | 15,553,154 | 15,553,367 | 6  | 0 | 0  | no  | TE |
| at_locus.09714 | 5 | 15,566,668 | 15,566,891 | 5  | 0 | 2  | yes |    |
| at_locus.09715 | 5 | 15,593,917 | 15,594,465 | 25 | 0 | 0  | no  | TE |
| at_locus.09716 | 5 | 15,597,886 | 15,598,670 | 11 | 0 | 0  | yes | TE |
| at_locus.09717 | 5 | 15,608,794 | 15,609,228 | 4  | 0 | 0  | yes | TE |
| at_locus.09718 | 5 | 15,622,573 | 15,623,138 | 25 | 2 | 0  | no  | TE |
| at_locus.09719 | 5 | 15,623,746 | 15,623,831 | 16 | 0 | 0  | no  | TE |
| at_locus.09720 | 5 | 15,653,572 | 15,653,629 | 11 | 0 | 0  | no  | TE |
| at_locus.09721 | 5 | 15,656,266 | 15,656,362 | 5  | 0 | 1  | no  | TE |
| at_locus.09722 | 5 | 15,657,720 | 15,658,253 | 7  | 0 | 1  | yes | TE |
| at_locus.09723 | 5 | 15,665,013 | 15,665,036 | 4  | 0 | 0  | yes | TE |
| at_locus.09724 | 5 | 15,676,496 | 15,676,657 | 16 | 0 | 0  | no  | TE |
| at_locus.09725 | 5 | 15,713,834 | 15,713,920 | 7  | 0 | 0  | no  | TE |
| at_locus.09726 | 5 | 15,713,981 | 15,714,377 | 2  | 0 | 3  | no  | TE |
| at_locus.09727 | 5 | 15,714,570 | 15,714,650 | 15 | 0 | 0  | no  | TE |
| at_locus.09728 | 5 | 15,716,387 | 15,716,618 | 7  | 0 | 0  | yes | TE |
| at_locus.09729 | 5 | 15,717,230 | 15,717,376 | 8  | 0 | 0  | no  |    |
| at_locus.09730 | 5 | 15,718,059 | 15,718,255 | 5  | 0 | 5  | yes | TE |
| at_locus.09731 | 5 | 15,727,598 | 15,727,653 | 5  | 0 | 0  | yes |    |
| at_locus.09732 | 5 | 15,728,271 | 15,728,375 | 9  | 0 | 2  | yes |    |

|                |   |            |            |    |     |    |     |    |
|----------------|---|------------|------------|----|-----|----|-----|----|
| at_locus.09733 | 5 | 15,732,203 | 15,732,245 | 7  | 0   | 0  | no  | TE |
| at_locus.09734 | 5 | 15,733,641 | 15,734,539 | 15 | 0   | 5  | yes | TE |
| at_locus.09735 | 5 | 15,735,097 | 15,735,504 | 5  | 0   | 5  | no  | TE |
| at_locus.09736 | 5 | 15,739,351 | 15,739,707 | 0  | 0   | 4  | yes | TE |
| at_locus.09737 | 5 | 15,774,895 | 15,775,318 | 6  | 19  | 26 | yes |    |
| at_locus.09738 | 5 | 15,796,272 | 15,796,358 | 30 | 0   | 0  | no  | TE |
| at_locus.09739 | 5 | 15,829,352 | 15,829,875 | 8  | 0   | 10 | yes | TE |
| at_locus.09740 | 5 | 15,845,617 | 15,845,676 | 12 | 0   | 0  | yes |    |
| at_locus.09741 | 5 | 15,846,115 | 15,846,466 | 2  | 0   | 5  | yes | TE |
| at_locus.09742 | 5 | 15,847,880 | 15,847,939 | 4  | 0   | 0  | yes |    |
| at_locus.09743 | 5 | 15,858,285 | 15,858,403 | 5  | 1   | 0  | yes |    |
| at_locus.09744 | 5 | 15,873,677 | 15,873,796 | 15 | 0   | 4  | no  | TE |
| at_locus.09745 | 5 | 15,888,095 | 15,888,117 | 87 | 137 | 89 | yes |    |
| at_locus.09746 | 5 | 15,890,234 | 15,890,727 | 17 | 1   | 13 | yes |    |
| at_locus.09747 | 5 | 15,899,528 | 15,899,992 | 12 | 1   | 0  | no  | TE |
| at_locus.09748 | 5 | 15,904,811 | 15,904,970 | 10 | 0   | 1  | yes |    |
| at_locus.09749 | 5 | 15,906,099 | 15,906,126 | 4  | 0   | 0  | no  |    |
| at_locus.09750 | 5 | 15,908,840 | 15,909,085 | 1  | 8   | 0  | yes |    |
| at_locus.09751 | 5 | 15,936,768 | 15,937,012 | 1  | 0   | 4  | yes |    |
| at_locus.09752 | 5 | 15,939,688 | 15,939,717 | 11 | 0   | 2  | no  |    |
| at_locus.09753 | 5 | 15,944,098 | 15,944,333 | 15 | 0   | 2  | yes |    |
| at_locus.09754 | 5 | 15,984,866 | 15,984,974 | 1  | 0   | 4  | yes |    |
| at_locus.09756 | 5 | 15,999,410 | 15,999,769 | 8  | 0   | 12 | yes |    |
| at_locus.09757 | 5 | 15,999,979 | 16,001,057 | 87 | 1   | 55 | yes |    |
| at_locus.09758 | 5 | 16,001,505 | 16,001,813 | 13 | 0   | 8  | yes |    |
| at_locus.09759 | 5 | 16,002,446 | 16,002,580 | 5  | 0   | 0  | yes |    |
| at_locus.09760 | 5 | 16,009,658 | 16,010,320 | 12 | 0   | 11 | yes | TE |
| at_locus.09761 | 5 | 16,020,714 | 16,020,982 | 4  | 0   | 0  | yes |    |
| at_locus.09762 | 5 | 16,031,079 | 16,032,137 | 10 | 0   | 4  | no  | TE |
| at_locus.09763 | 5 | 16,032,898 | 16,033,401 | 34 | 0   | 23 | yes |    |
| at_locus.09764 | 5 | 16,034,917 | 16,035,316 | 15 | 0   | 14 | yes |    |
| at_locus.09765 | 5 | 16,036,027 | 16,036,105 | 0  | 0   | 4  | yes |    |
| at_locus.09766 | 5 | 16,040,919 | 16,040,967 | 4  | 0   | 0  | yes |    |
| at_locus.09767 | 5 | 16,047,892 | 16,047,926 | 9  | 0   | 0  | no  | TE |
| at_locus.09768 | 5 | 16,050,920 | 16,051,260 | 18 | 0   | 0  | yes |    |
| at_locus.09769 | 5 | 16,066,390 | 16,066,556 | 4  | 0   | 0  | yes | TE |
| at_locus.09770 | 5 | 16,067,096 | 16,068,544 | 27 | 0   | 15 | no  | TE |

|                |   |            |            |     |      |     |     |    |
|----------------|---|------------|------------|-----|------|-----|-----|----|
| at_locus.09771 | 5 | 16,137,432 | 16,137,689 | 14  | 0    | 0   | no  | TE |
| at_locus.09772 | 5 | 16,148,024 | 16,148,258 | 4   | 0    | 0   | yes | TE |
| at_locus.09773 | 5 | 16,221,488 | 16,221,890 | 6   | 0    | 0   | yes |    |
| at_locus.09774 | 5 | 16,228,609 | 16,229,100 | 14  | 0    | 1   | yes | TE |
| at_locus.09775 | 5 | 16,275,033 | 16,275,581 | 19  | 0    | 2   | yes | TE |
| at_locus.09776 | 5 | 16,276,395 | 16,277,154 | 19  | 0    | 11  | yes | TE |
| at_locus.09777 | 5 | 16,281,422 | 16,281,836 | 15  | 0    | 1   | yes | TE |
| at_locus.09778 | 5 | 16,374,396 | 16,374,737 | 10  | 0    | 0   | no  | TE |
| at_locus.09779 | 5 | 16,374,962 | 16,375,069 | 23  | 2    | 0   | no  | TE |
| at_locus.09780 | 5 | 16,375,480 | 16,375,550 | 6   | 0    | 1   | no  | TE |
| at_locus.09781 | 5 | 16,382,336 | 16,382,519 | 7   | 0    | 2   | yes |    |
| at_locus.09782 | 5 | 16,392,299 | 16,392,322 | 1   | 0    | 4   | no  |    |
| at_locus.09783 | 5 | 16,410,806 | 16,410,882 | 4   | 0    | 0   | yes |    |
| at_locus.09784 | 5 | 16,577,657 | 16,578,367 | 14  | 0    | 9   | yes | TE |
| at_locus.09785 | 5 | 16,657,142 | 16,657,838 | 1   | 10   | 5   | yes |    |
| at_locus.09786 | 5 | 16,659,299 | 16,659,521 | 13  | 0    | 1   | no  |    |
| at_locus.09787 | 5 | 16,677,696 | 16,677,866 | 177 | 1642 | 448 | yes |    |
| at_locus.09788 | 5 | 16,698,614 | 16,698,812 | 5   | 0    | 0   | yes |    |
| at_locus.09789 | 5 | 16,699,585 | 16,699,904 | 4   | 0    | 0   | yes | TE |
| at_locus.09790 | 5 | 16,730,081 | 16,730,189 | 5   | 0    | 0   | no  | TE |
| at_locus.09791 | 5 | 16,730,480 | 16,730,619 | 4   | 0    | 0   | no  | TE |
| at_locus.09792 | 5 | 16,733,408 | 16,733,787 | 2   | 4    | 1   | yes |    |
| at_locus.09793 | 5 | 16,738,926 | 16,739,009 | 6   | 0    | 1   | yes | TE |
| at_locus.09794 | 5 | 16,764,470 | 16,764,888 | 7   | 0    | 0   | yes | TE |
| at_locus.09795 | 5 | 16,771,081 | 16,771,244 | 9   | 0    | 0   | yes |    |
| at_locus.09796 | 5 | 16,792,751 | 16,792,886 | 76  | 441  | 198 | yes |    |
| at_locus.09797 | 5 | 16,873,365 | 16,873,600 | 9   | 0    | 2   | yes | TE |
| at_locus.09798 | 5 | 16,888,153 | 16,888,672 | 37  | 0    | 0   | yes | TE |
| at_locus.09799 | 5 | 16,918,903 | 16,919,113 | 8   | 0    | 4   | yes |    |
| at_locus.09800 | 5 | 16,925,724 | 16,926,244 | 10  | 0    | 5   | no  | TE |
| at_locus.09801 | 5 | 16,927,455 | 16,927,540 | 5   | 0    | 0   | yes | TE |
| at_locus.09802 | 5 | 16,931,463 | 16,931,862 | 5   | 0    | 0   | yes |    |
| at_locus.09803 | 5 | 16,939,536 | 16,939,652 | 4   | 0    | 0   | yes | TE |
| at_locus.09804 | 5 | 16,979,675 | 16,979,877 | 4   | 0    | 0   | yes |    |
| at_locus.09805 | 5 | 16,983,765 | 16,983,995 | 1   | 0    | 4   | yes | TE |
| at_locus.09806 | 5 | 17,037,300 | 17,037,528 | 4   | 0    | 0   | yes |    |
| at_locus.09807 | 5 | 17,045,977 | 17,046,444 | 6   | 0    | 1   | yes | TE |

|                |   |            |            |     |    |    |     |    |
|----------------|---|------------|------------|-----|----|----|-----|----|
| at_locus.09808 | 5 | 17,046,973 | 17,047,759 | 11  | 0  | 3  | no  | TE |
| at_locus.09809 | 5 | 17,059,001 | 17,059,154 | 9   | 1  | 2  | no  | TE |
| at_locus.09810 | 5 | 17,059,456 | 17,059,792 | 19  | 0  | 4  | yes | TE |
| at_locus.09811 | 5 | 17,060,956 | 17,061,127 | 10  | 0  | 0  | no  | TE |
| at_locus.09812 | 5 | 17,064,479 | 17,064,742 | 4   | 0  | 0  | yes | TE |
| at_locus.09813 | 5 | 17,093,408 | 17,093,488 | 8   | 0  | 0  | yes |    |
| at_locus.09814 | 5 | 17,093,851 | 17,094,015 | 10  | 0  | 0  | no  |    |
| at_locus.09815 | 5 | 17,102,783 | 17,104,552 | 86  | 0  | 23 | yes | TE |
| at_locus.09816 | 5 | 17,112,203 | 17,112,503 | 0   | 0  | 5  | yes | TE |
| at_locus.09817 | 5 | 17,130,580 | 17,130,624 | 5   | 0  | 1  | yes |    |
| at_locus.09818 | 5 | 17,152,332 | 17,152,403 | 4   | 0  | 0  | yes | TE |
| at_locus.09819 | 5 | 17,164,716 | 17,164,776 | 11  | 0  | 0  | yes | TE |
| at_locus.09820 | 5 | 17,190,773 | 17,190,937 | 2   | 0  | 7  | yes |    |
| at_locus.09821 | 5 | 17,191,249 | 17,191,278 | 4   | 0  | 1  | yes |    |
| at_locus.09822 | 5 | 17,191,804 | 17,192,497 | 106 | 3  | 79 | yes | TE |
| at_locus.09823 | 5 | 17,208,153 | 17,208,366 | 6   | 0  | 0  | yes |    |
| at_locus.09824 | 5 | 17,214,119 | 17,214,331 | 5   | 0  | 0  | yes |    |
| at_locus.09825 | 5 | 17,227,801 | 17,227,843 | 5   | 1  | 0  | yes | TE |
| at_locus.09826 | 5 | 17,233,675 | 17,233,692 | 2   | 15 | 3  | yes |    |
| at_locus.09827 | 5 | 17,239,306 | 17,239,455 | 8   | 0  | 0  | yes | TE |
| at_locus.09828 | 5 | 17,249,191 | 17,249,419 | 6   | 0  | 0  | no  |    |
| at_locus.09829 | 5 | 17,251,078 | 17,251,306 | 5   | 0  | 0  | no  |    |
| at_locus.09830 | 5 | 17,268,614 | 17,268,645 | 4   | 0  | 0  | no  |    |
| at_locus.09831 | 5 | 17,293,137 | 17,293,160 | 4   | 0  | 0  | no  | TE |
| at_locus.09832 | 5 | 17,299,151 | 17,299,241 | 4   | 0  | 0  | yes | TE |
| at_locus.09833 | 5 | 17,308,156 | 17,308,327 | 9   | 0  | 0  | yes |    |
| at_locus.09834 | 5 | 17,308,987 | 17,309,028 | 4   | 0  | 0  | yes | TE |
| at_locus.09835 | 5 | 17,344,440 | 17,344,743 | 8   | 0  | 1  | yes |    |
| at_locus.09836 | 5 | 17,364,288 | 17,364,509 | 24  | 2  | 0  | yes |    |
| at_locus.09837 | 5 | 17,376,581 | 17,377,324 | 22  | 0  | 2  | yes | TE |
| at_locus.09838 | 5 | 17,382,253 | 17,382,328 | 13  | 0  | 0  | no  | TE |
| at_locus.09839 | 5 | 17,382,963 | 17,383,275 | 8   | 2  | 0  | no  | TE |
| at_locus.09840 | 5 | 17,383,505 | 17,384,129 | 21  | 1  | 0  | no  | TE |
| at_locus.09841 | 5 | 17,422,782 | 17,424,005 | 14  | 0  | 12 | no  | TE |
| at_locus.09842 | 5 | 17,424,173 | 17,424,472 | 0   | 0  | 5  | no  | TE |
| at_locus.09843 | 5 | 17,449,726 | 17,449,932 | 5   | 0  | 2  | yes |    |
| at_locus.09844 | 5 | 17,450,143 | 17,450,459 | 5   | 1  | 0  | yes |    |

|                |   |            |            |    |     |     |     |    |
|----------------|---|------------|------------|----|-----|-----|-----|----|
| at_locus.09845 | 5 | 17,455,580 | 17,455,929 | 9  | 0   | 3   | no  |    |
| at_locus.09847 | 5 | 17,486,779 | 17,486,855 | 12 | 0   | 0   | yes |    |
| at_locus.09848 | 5 | 17,491,523 | 17,491,782 | 15 | 0   | 0   | yes |    |
| at_locus.09849 | 5 | 17,492,292 | 17,492,371 | 2  | 4   | 0   | yes |    |
| at_locus.09850 | 5 | 17,495,435 | 17,495,558 | 10 | 0   | 0   | yes |    |
| at_locus.09851 | 5 | 17,497,512 | 17,497,934 | 8  | 0   | 4   | yes | TE |
| at_locus.09852 | 5 | 17,498,381 | 17,498,467 | 5  | 0   | 0   | no  | TE |
| at_locus.09853 | 5 | 17,499,035 | 17,499,158 | 9  | 0   | 0   | no  | TE |
| at_locus.09854 | 5 | 17,499,701 | 17,499,812 | 11 | 0   | 0   | no  |    |
| at_locus.09855 | 5 | 17,501,858 | 17,502,102 | 13 | 0   | 0   | yes |    |
| at_locus.09856 | 5 | 17,505,563 | 17,505,684 | 8  | 0   | 0   | yes |    |
| at_locus.09857 | 5 | 17,533,537 | 17,533,626 | 74 | 441 | 198 | yes |    |
| at_locus.09858 | 5 | 17,560,401 | 17,560,660 | 7  | 1   | 5   | yes |    |
| at_locus.09859 | 5 | 17,583,844 | 17,584,576 | 5  | 14  | 3   | yes |    |
| at_locus.09860 | 5 | 17,595,988 | 17,596,066 | 6  | 0   | 0   | yes | TE |
| at_locus.09861 | 5 | 17,600,202 | 17,600,259 | 5  | 0   | 0   | yes | TE |
| at_locus.09862 | 5 | 17,614,008 | 17,614,526 | 16 | 0   | 4   | no  | TE |
| at_locus.09863 | 5 | 17,622,385 | 17,623,254 | 17 | 0   | 6   | yes | TE |
| at_locus.09864 | 5 | 17,627,548 | 17,627,581 | 6  | 0   | 0   | yes |    |
| at_locus.09865 | 5 | 17,634,581 | 17,635,219 | 25 | 2   | 1   | yes | TE |
| at_locus.09866 | 5 | 17,635,827 | 17,635,860 | 5  | 0   | 0   | no  | TE |
| at_locus.09867 | 5 | 17,661,683 | 17,661,826 | 10 | 0   | 0   | no  | TE |
| at_locus.09868 | 5 | 17,743,663 | 17,744,210 | 67 | 0   | 1   | no  | TE |
| at_locus.09869 | 5 | 17,759,499 | 17,759,674 | 4  | 0   | 0   | yes | TE |
| at_locus.09870 | 5 | 17,792,975 | 17,793,041 | 8  | 0   | 0   | no  | TE |
| at_locus.09871 | 5 | 17,793,721 | 17,794,807 | 55 | 4   | 0   | no  | TE |
| at_locus.09872 | 5 | 17,813,587 | 17,813,657 | 11 | 0   | 0   | no  | TE |
| at_locus.09873 | 5 | 17,813,927 | 17,814,012 | 16 | 0   | 0   | no  | TE |
| at_locus.09874 | 5 | 17,829,836 | 17,829,967 | 5  | 1   | 0   | no  | TE |
| at_locus.09875 | 5 | 17,850,749 | 17,851,022 | 15 | 0   | 0   | yes | TE |
| at_locus.09876 | 5 | 17,867,590 | 17,867,896 | 5  | 0   | 0   | yes | TE |
| at_locus.09877 | 5 | 17,868,546 | 17,868,947 | 9  | 1   | 15  | yes | TE |
| at_locus.09878 | 5 | 17,869,175 | 17,869,654 | 14 | 0   | 1   | yes | TE |
| at_locus.09879 | 5 | 17,884,397 | 17,884,507 | 7  | 0   | 1   | yes | TE |
| at_locus.09880 | 5 | 17,884,980 | 17,885,528 | 8  | 0   | 4   | yes | TE |
| at_locus.09881 | 5 | 17,885,872 | 17,886,065 | 6  | 0   | 2   | no  | TE |
| at_locus.09882 | 5 | 17,886,337 | 17,886,453 | 11 | 0   | 0   | yes | TE |



|                |   |            |            |    |   |    |     |    |
|----------------|---|------------|------------|----|---|----|-----|----|
| at_locus.09883 | 5 | 17,907,485 | 17,907,789 | 4  | 0 | 0  | yes | TE |
| at_locus.09884 | 5 | 17,910,864 | 17,911,404 | 8  | 0 | 4  | yes | TE |
| at_locus.09885 | 5 | 17,911,885 | 17,912,395 | 3  | 1 | 8  | no  | TE |
| at_locus.09886 | 5 | 17,914,300 | 17,914,669 | 3  | 0 | 8  | no  | TE |
| at_locus.09887 | 5 | 17,914,966 | 17,915,082 | 7  | 0 | 0  | no  | TE |
| at_locus.09888 | 5 | 17,915,329 | 17,915,700 | 1  | 0 | 5  | no  | TE |
| at_locus.09889 | 5 | 17,916,024 | 17,916,956 | 4  | 0 | 7  | no  | TE |
| at_locus.09890 | 5 | 17,917,373 | 17,917,821 | 3  | 0 | 5  | no  | TE |
| at_locus.09891 | 5 | 17,918,432 | 17,918,739 | 15 | 0 | 9  | yes | TE |
| at_locus.09892 | 5 | 17,943,751 | 17,943,839 | 9  | 0 | 0  | yes |    |
| at_locus.09893 | 5 | 17,972,828 | 17,973,116 | 9  | 0 | 0  | no  | TE |
| at_locus.09894 | 5 | 17,973,687 | 17,974,158 | 19 | 0 | 0  | no  | TE |
| at_locus.09895 | 5 | 17,992,862 | 17,993,065 | 4  | 0 | 0  | yes | TE |
| at_locus.09896 | 5 | 18,013,044 | 18,013,070 | 4  | 0 | 2  | yes |    |
| at_locus.09897 | 5 | 18,057,172 | 18,057,486 | 7  | 0 | 4  | yes |    |
| at_locus.09898 | 5 | 18,069,367 | 18,069,437 | 4  | 0 | 0  | yes |    |
| at_locus.09899 | 5 | 18,080,764 | 18,080,950 | 4  | 0 | 0  | yes | TE |
| at_locus.09900 | 5 | 18,135,896 | 18,136,106 | 4  | 0 | 0  | yes | TE |
| at_locus.09901 | 5 | 18,136,693 | 18,137,000 | 13 | 0 | 1  | no  | TE |
| at_locus.09902 | 5 | 18,137,265 | 18,137,569 | 4  | 0 | 4  | no  | TE |
| at_locus.09903 | 5 | 18,139,013 | 18,139,749 | 8  | 0 | 10 | no  | TE |
| at_locus.09904 | 5 | 18,141,240 | 18,141,878 | 1  | 0 | 8  | no  | TE |
| at_locus.09905 | 5 | 18,142,271 | 18,142,681 | 1  | 1 | 5  | no  | TE |
| at_locus.09906 | 5 | 18,143,472 | 18,144,088 | 7  | 0 | 5  | no  | TE |
| at_locus.09907 | 5 | 18,144,613 | 18,145,373 | 18 | 0 | 5  | no  | TE |
| at_locus.09908 | 5 | 18,146,125 | 18,146,419 | 1  | 0 | 5  | no  | TE |
| at_locus.09909 | 5 | 18,146,943 | 18,147,271 | 4  | 0 | 0  | no  | TE |
| at_locus.09910 | 5 | 18,147,539 | 18,147,854 | 5  | 0 | 0  | no  | TE |
| at_locus.09911 | 5 | 18,148,119 | 18,148,302 | 5  | 0 | 2  | no  | TE |
| at_locus.09912 | 5 | 18,148,767 | 18,149,324 | 6  | 0 | 1  | no  | TE |
| at_locus.09913 | 5 | 18,149,549 | 18,149,930 | 16 | 0 | 4  | no  | TE |
| at_locus.09914 | 5 | 18,163,649 | 18,164,019 | 12 | 0 | 3  | yes | TE |
| at_locus.09915 | 5 | 18,188,604 | 18,189,141 | 27 | 0 | 24 | no  | TE |
| at_locus.09916 | 5 | 18,211,633 | 18,212,143 | 9  | 0 | 1  | yes | TE |
| at_locus.09917 | 5 | 18,212,703 | 18,213,140 | 0  | 0 | 4  | no  | TE |
| at_locus.09918 | 5 | 18,213,394 | 18,214,104 | 7  | 0 | 6  | yes | TE |
| at_locus.09919 | 5 | 18,215,816 | 18,216,262 | 5  | 0 | 2  | no  | TE |

|                |   |            |            |    |     |     |     |    |
|----------------|---|------------|------------|----|-----|-----|-----|----|
| at_locus.09920 | 5 | 18,216,451 | 18,216,547 | 0  | 0   | 4   | no  | TE |
| at_locus.09921 | 5 | 18,216,605 | 18,217,098 | 4  | 0   | 0   | yes | TE |
| at_locus.09922 | 5 | 18,217,334 | 18,217,695 | 7  | 0   | 1   | no  | TE |
| at_locus.09923 | 5 | 18,256,376 | 18,256,548 | 3  | 0   | 0   | yes |    |
| at_locus.09924 | 5 | 18,376,099 | 18,376,120 | 66 | 115 | 127 | no  |    |
| at_locus.09925 | 5 | 18,432,063 | 18,432,098 | 5  | 0   | 0   | yes |    |
| at_locus.09926 | 5 | 18,438,216 | 18,438,425 | 18 | 0   | 4   | yes |    |
| at_locus.09927 | 5 | 18,473,762 | 18,473,868 | 4  | 0   | 0   | yes | TE |
| at_locus.09928 | 5 | 18,496,953 | 18,497,839 | 17 | 0   | 6   | yes | TE |
| at_locus.09929 | 5 | 18,503,945 | 18,503,981 | 5  | 0   | 0   | yes | TE |
| at_locus.09930 | 5 | 18,507,836 | 18,508,021 | 8  | 0   | 1   | no  | TE |
| at_locus.09931 | 5 | 18,512,191 | 18,512,559 | 9  | 0   | 1   | no  | TE |
| at_locus.09932 | 5 | 18,537,440 | 18,537,480 | 5  | 0   | 1   | no  |    |
| at_locus.09933 | 5 | 18,538,097 | 18,538,276 | 11 | 0   | 1   | yes |    |
| at_locus.09934 | 5 | 18,551,077 | 18,551,513 | 9  | 0   | 5   | yes |    |
| at_locus.09935 | 5 | 18,567,925 | 18,568,028 | 5  | 0   | 0   | yes |    |
| at_locus.09936 | 5 | 18,571,344 | 18,571,624 | 11 | 0   | 1   | yes | TE |
| at_locus.09937 | 5 | 18,588,099 | 18,588,180 | 20 | 1   | 0   | yes |    |
| at_locus.09938 | 5 | 18,643,437 | 18,643,700 | 7  | 0   | 2   | no  | TE |
| at_locus.09939 | 5 | 18,643,924 | 18,644,410 | 6  | 0   | 1   | no  |    |
| at_locus.09940 | 5 | 18,653,591 | 18,653,669 | 6  | 0   | 2   | yes |    |
| at_locus.09941 | 5 | 18,654,304 | 18,654,735 | 51 | 1   | 7   | yes |    |
| at_locus.09942 | 5 | 18,684,572 | 18,684,658 | 4  | 0   | 0   | yes | TE |
| at_locus.09943 | 5 | 18,686,154 | 18,687,072 | 45 | 0   | 20  | yes | TE |
| at_locus.09944 | 5 | 18,734,892 | 18,734,953 | 7  | 0   | 0   | yes |    |
| at_locus.09945 | 5 | 18,744,171 | 18,744,730 | 8  | 0   | 10  | yes | TE |
| at_locus.09946 | 5 | 18,755,062 | 18,755,171 | 6  | 1   | 0   | yes |    |
| at_locus.09948 | 5 | 18,826,162 | 18,826,422 | 20 | 2   | 0   | yes |    |
| at_locus.09949 | 5 | 18,871,179 | 18,871,264 | 16 | 0   | 0   | no  | TE |
| at_locus.09950 | 5 | 18,872,298 | 18,872,474 | 19 | 0   | 0   | no  | TE |
| at_locus.09951 | 5 | 18,872,709 | 18,873,028 | 22 | 1   | 0   | no  | TE |
| at_locus.09952 | 5 | 18,895,607 | 18,895,625 | 0  | 16  | 0   | yes |    |
| at_locus.09953 | 5 | 18,919,120 | 18,919,157 | 4  | 0   | 0   | yes |    |
| at_locus.09954 | 5 | 18,936,873 | 18,937,308 | 10 | 0   | 0   | yes | TE |
| at_locus.09955 | 5 | 18,944,541 | 18,944,941 | 4  | 0   | 0   | yes |    |
| at_locus.09956 | 5 | 18,950,398 | 18,950,492 | 6  | 0   | 2   | no  | TE |
| at_locus.09957 | 5 | 18,950,730 | 18,951,099 | 0  | 0   | 4   | no  | TE |

|                |   |            |            |    |    |    |     |    |
|----------------|---|------------|------------|----|----|----|-----|----|
| at_locus.09958 | 5 | 18,953,144 | 18,953,431 | 0  | 0  | 4  | no  | TE |
| at_locus.09959 | 5 | 18,955,714 | 18,955,846 | 7  | 0  | 2  | no  | TE |
| at_locus.09960 | 5 | 18,997,407 | 18,998,056 | 11 | 1  | 3  | no  | TE |
| at_locus.09961 | 5 | 18,998,270 | 18,998,675 | 12 | 2  | 5  | yes | TE |
| at_locus.09962 | 5 | 19,019,211 | 19,019,663 | 7  | 0  | 0  | yes | TE |
| at_locus.09963 | 5 | 19,026,322 | 19,026,406 | 9  | 48 | 17 | yes |    |
| at_locus.09964 | 5 | 19,035,897 | 19,036,363 | 26 | 0  | 1  | yes |    |
| at_locus.09965 | 5 | 19,036,640 | 19,036,775 | 9  | 0  | 0  | no  | TE |
| at_locus.09966 | 5 | 19,043,604 | 19,043,842 | 9  | 0  | 0  | yes |    |
| at_locus.09967 | 5 | 19,044,886 | 19,044,968 | 30 | 0  | 0  | yes | TE |
| at_locus.09968 | 5 | 19,060,066 | 19,060,159 | 5  | 0  | 0  | yes | TE |
| at_locus.09969 | 5 | 19,078,238 | 19,078,275 | 11 | 0  | 5  | yes |    |
| at_locus.09970 | 5 | 19,080,973 | 19,081,496 | 16 | 0  | 12 | yes |    |
| at_locus.09971 | 5 | 19,097,817 | 19,097,865 | 6  | 0  | 1  | no  | TE |
| at_locus.09972 | 5 | 19,118,913 | 19,119,338 | 14 | 1  | 0  | no  | TE |
| at_locus.09973 | 5 | 19,131,810 | 19,132,251 | 5  | 0  | 0  | no  | TE |
| at_locus.09974 | 5 | 19,170,909 | 19,170,971 | 6  | 0  | 0  | no  | TE |
| at_locus.09975 | 5 | 19,192,939 | 19,193,061 | 5  | 1  | 0  | yes | TE |
| at_locus.09976 | 5 | 19,206,805 | 19,206,993 | 0  | 0  | 4  | yes |    |
| at_locus.09977 | 5 | 19,216,131 | 19,216,332 | 0  | 0  | 4  | yes |    |
| at_locus.09978 | 5 | 19,297,565 | 19,297,844 | 6  | 0  | 0  | yes |    |
| at_locus.09979 | 5 | 19,359,903 | 19,359,919 | 0  | 0  | 4  | no  |    |
| at_locus.09980 | 5 | 19,424,851 | 19,425,213 | 12 | 0  | 7  | yes |    |
| at_locus.09981 | 5 | 19,425,606 | 19,425,741 | 11 | 0  | 0  | no  | TE |
| at_locus.09982 | 5 | 19,436,269 | 19,436,343 | 21 | 0  | 2  | no  | TE |
| at_locus.09983 | 5 | 19,436,596 | 19,436,749 | 6  | 0  | 1  | no  | TE |
| at_locus.09984 | 5 | 19,437,008 | 19,437,769 | 25 | 0  | 5  | no  | TE |
| at_locus.09985 | 5 | 19,443,433 | 19,443,624 | 0  | 0  | 1  | no  | TE |
| at_locus.09986 | 5 | 19,444,183 | 19,444,331 | 21 | 2  | 2  | no  | TE |
| at_locus.09987 | 5 | 19,456,253 | 19,456,890 | 5  | 0  | 5  | yes | TE |
| at_locus.09988 | 5 | 19,465,096 | 19,465,131 | 7  | 0  | 0  | no  |    |
| at_locus.09989 | 5 | 19,496,844 | 19,496,978 | 24 | 0  | 1  | no  | TE |
| at_locus.09990 | 5 | 19,497,212 | 19,497,301 | 8  | 0  | 0  | yes | TE |
| at_locus.09991 | 5 | 19,511,094 | 19,511,194 | 4  | 0  | 0  | yes | TE |
| at_locus.09992 | 5 | 19,513,150 | 19,513,408 | 14 | 0  | 0  | no  | TE |
| at_locus.09993 | 5 | 19,514,004 | 19,514,260 | 26 | 2  | 2  | yes | TE |
| at_locus.09994 | 5 | 19,516,096 | 19,516,412 | 8  | 0  | 2  | yes | TE |

|                |   |            |            |    |    |    |     |    |
|----------------|---|------------|------------|----|----|----|-----|----|
| at_locus.09995 | 5 | 19,543,561 | 19,543,817 | 12 | 0  | 0  | yes |    |
| at_locus.09996 | 5 | 19,561,275 | 19,561,755 | 6  | 0  | 1  | no  |    |
| at_locus.09997 | 5 | 19,624,813 | 19,625,064 | 5  | 0  | 1  | yes |    |
| at_locus.09998 | 5 | 19,688,035 | 19,688,112 | 9  | 0  | 0  | no  | TE |
| at_locus.09999 | 5 | 19,688,837 | 19,688,974 | 18 | 2  | 0  | no  | TE |
| at_locus.10000 | 5 | 19,743,589 | 19,743,664 | 10 | 0  | 1  | yes |    |
| at_locus.10001 | 5 | 19,757,860 | 19,758,560 | 64 | 6  | 1  | no  | TE |
| at_locus.10002 | 5 | 19,758,816 | 19,759,128 | 11 | 2  | 0  | no  | TE |
| at_locus.10003 | 5 | 19,759,758 | 19,759,835 | 9  | 0  | 0  | no  | TE |
| at_locus.10004 | 5 | 19,763,698 | 19,763,741 | 11 | 1  | 0  | yes |    |
| at_locus.10005 | 5 | 19,769,445 | 19,770,030 | 15 | 0  | 11 | yes |    |
| at_locus.10006 | 5 | 19,829,262 | 19,829,427 | 12 | 1  | 0  | yes |    |
| at_locus.10007 | 5 | 19,849,633 | 19,849,820 | 4  | 0  | 0  | yes | TE |
| at_locus.10008 | 5 | 19,887,996 | 19,888,161 | 96 | 0  | 0  | yes | TE |
| at_locus.10009 | 5 | 19,902,925 | 19,902,960 | 4  | 0  | 1  | no  |    |
| at_locus.10010 | 5 | 19,903,159 | 19,903,320 | 0  | 1  | 5  | yes |    |
| at_locus.10011 | 5 | 19,908,344 | 19,909,867 | 5  | 0  | 2  | no  |    |
| at_locus.10012 | 5 | 19,927,691 | 19,927,813 | 6  | 0  | 1  | yes | TE |
| at_locus.10013 | 5 | 19,947,532 | 19,947,933 | 15 | 0  | 2  | no  | TE |
| at_locus.10014 | 5 | 19,948,705 | 19,948,784 | 11 | 0  | 0  | no  | TE |
| at_locus.10015 | 5 | 19,969,699 | 19,969,907 | 21 | 0  | 0  | yes |    |
| at_locus.10016 | 5 | 19,984,963 | 19,985,154 | 7  | 0  | 0  | yes | TE |
| at_locus.10017 | 5 | 20,015,363 | 20,015,601 | 11 | 0  | 0  | yes |    |
| at_locus.10018 | 5 | 20,106,923 | 20,107,120 | 11 | 1  | 0  | yes |    |
| at_locus.10019 | 5 | 20,136,854 | 20,136,937 | 4  | 0  | 0  | no  | TE |
| at_locus.10020 | 5 | 20,145,622 | 20,145,653 | 4  | 0  | 3  | yes | TE |
| at_locus.10021 | 5 | 20,146,059 | 20,146,182 | 2  | 0  | 5  | no  | TE |
| at_locus.10022 | 5 | 20,146,315 | 20,146,929 | 55 | 1  | 0  | no  | TE |
| at_locus.10023 | 5 | 20,151,642 | 20,151,910 | 14 | 47 | 19 | yes |    |
| at_locus.10024 | 5 | 20,267,190 | 20,267,429 | 11 | 0  | 1  | yes |    |
| at_locus.10025 | 5 | 20,294,320 | 20,294,683 | 6  | 0  | 0  | yes | TE |
| at_locus.10026 | 5 | 20,295,169 | 20,295,368 | 8  | 0  | 1  | yes | TE |
| at_locus.10027 | 5 | 20,295,842 | 20,296,052 | 12 | 0  | 0  | yes | TE |
| at_locus.10028 | 5 | 20,297,260 | 20,297,955 | 50 | 2  | 1  | no  | TE |
| at_locus.10029 | 5 | 20,298,177 | 20,298,518 | 9  | 2  | 0  | no  | TE |
| at_locus.10030 | 5 | 20,299,142 | 20,299,210 | 4  | 0  | 0  | no  | TE |
| at_locus.10031 | 5 | 20,312,351 | 20,312,456 | 9  | 0  | 0  | yes |    |

|                |   |            |            |     |    |    |     |    |
|----------------|---|------------|------------|-----|----|----|-----|----|
| at_locus.10032 | 5 | 20,330,275 | 20,331,633 | 174 | 1  | 93 | yes |    |
| at_locus.10033 | 5 | 20,331,916 | 20,332,143 | 6   | 0  | 5  | yes |    |
| at_locus.10034 | 5 | 20,415,444 | 20,416,209 | 38  | 2  | 3  | no  | TE |
| at_locus.10035 | 5 | 20,416,560 | 20,416,594 | 16  | 0  | 0  | no  | TE |
| at_locus.10036 | 5 | 20,444,003 | 20,444,124 | 34  | 0  | 2  | no  | TE |
| at_locus.10037 | 5 | 20,444,531 | 20,444,792 | 45  | 1  | 0  | yes | TE |
| at_locus.10038 | 5 | 20,457,377 | 20,458,471 | 20  | 0  | 14 | yes | TE |
| at_locus.10039 | 5 | 20,481,736 | 20,481,759 | 8   | 61 | 14 | yes |    |
| at_locus.10040 | 5 | 20,490,317 | 20,490,855 | 17  | 1  | 6  | yes |    |
| at_locus.10041 | 5 | 20,544,051 | 20,544,404 | 15  | 0  | 0  | yes | TE |
| at_locus.10042 | 5 | 20,574,779 | 20,574,911 | 11  | 0  | 0  | yes |    |
| at_locus.10043 | 5 | 20,592,909 | 20,593,762 | 53  | 0  | 22 | no  |    |
| at_locus.10044 | 5 | 20,609,338 | 20,609,411 | 4   | 0  | 0  | no  |    |
| at_locus.10045 | 5 | 20,611,727 | 20,611,870 | 56  | 2  | 4  | no  | TE |
| at_locus.10046 | 5 | 20,626,251 | 20,627,104 | 53  | 0  | 22 | no  |    |
| at_locus.10047 | 5 | 20,642,680 | 20,642,753 | 4   | 0  | 0  | no  |    |
| at_locus.10048 | 5 | 20,645,069 | 20,645,212 | 56  | 2  | 4  | no  | TE |
| at_locus.10049 | 5 | 20,649,374 | 20,649,609 | 0   | 0  | 5  | yes | TE |
| at_locus.10050 | 5 | 20,649,775 | 20,649,924 | 10  | 0  | 0  | yes | TE |
| at_locus.10051 | 5 | 20,656,769 | 20,657,577 | 14  | 0  | 5  | no  | TE |
| at_locus.10052 | 5 | 20,666,626 | 20,666,860 | 4   | 0  | 0  | yes |    |
| at_locus.10053 | 5 | 20,677,529 | 20,677,904 | 9   | 0  | 0  | no  |    |
| at_locus.10054 | 5 | 20,687,195 | 20,687,317 | 7   | 0  | 0  | yes |    |
| at_locus.10055 | 5 | 20,691,558 | 20,692,046 | 18  | 0  | 1  | yes | TE |
| at_locus.10056 | 5 | 20,697,661 | 20,698,386 | 69  | 4  | 0  | no  | TE |
| at_locus.10057 | 5 | 20,698,615 | 20,698,927 | 10  | 1  | 0  | no  | TE |
| at_locus.10059 | 5 | 20,773,971 | 20,774,271 | 7   | 0  | 0  | yes |    |
| at_locus.10060 | 5 | 20,788,996 | 20,789,222 | 21  | 1  | 5  | yes |    |
| at_locus.10061 | 5 | 20,790,301 | 20,790,436 | 9   | 0  | 0  | yes |    |
| at_locus.10062 | 5 | 20,805,426 | 20,805,643 | 22  | 0  | 0  | yes |    |
| at_locus.10063 | 5 | 20,805,904 | 20,805,972 | 4   | 0  | 0  | no  | TE |
| at_locus.10064 | 5 | 20,812,948 | 20,812,971 | 0   | 0  | 12 | yes |    |
| at_locus.10066 | 5 | 20,819,883 | 20,819,936 | 4   | 0  | 0  | yes |    |
| at_locus.10067 | 5 | 20,873,800 | 20,873,991 | 13  | 0  | 0  | yes | TE |
| at_locus.10068 | 5 | 20,901,345 | 20,901,451 | 5   | 0  | 0  | no  |    |
| at_locus.10069 | 5 | 20,995,655 | 20,996,326 | 19  | 0  | 15 | yes |    |
| at_locus.10070 | 5 | 21,013,987 | 21,014,149 | 2   | 6  | 4  | yes |    |

|                |   |            |            |    |   |    |     |    |
|----------------|---|------------|------------|----|---|----|-----|----|
| at_locus.10071 | 5 | 21,031,908 | 21,032,592 | 18 | 0 | 23 | yes | TE |
| at_locus.10072 | 5 | 21,033,565 | 21,033,795 | 7  | 0 | 0  | yes | TE |
| at_locus.10073 | 5 | 21,045,319 | 21,045,499 | 5  | 0 | 0  | yes |    |
| at_locus.10074 | 5 | 21,173,006 | 21,173,150 | 6  | 0 | 0  | yes |    |
| at_locus.10075 | 5 | 21,178,733 | 21,179,009 | 2  | 3 | 5  | yes |    |
| at_locus.10076 | 5 | 21,179,393 | 21,179,547 | 6  | 0 | 1  | yes |    |
| at_locus.10077 | 5 | 21,179,758 | 21,180,010 | 4  | 0 | 4  | yes |    |
| at_locus.10078 | 5 | 21,184,338 | 21,184,426 | 50 | 0 | 0  | no  |    |
| at_locus.10079 | 5 | 21,186,795 | 21,186,887 | 53 | 0 | 0  | yes |    |
| at_locus.10080 | 5 | 21,191,667 | 21,192,078 | 25 | 0 | 1  | yes | TE |
| at_locus.10081 | 5 | 21,193,023 | 21,193,078 | 8  | 0 | 0  | no  |    |
| at_locus.10082 | 5 | 21,210,168 | 21,210,449 | 5  | 0 | 0  | yes |    |
| at_locus.10083 | 5 | 21,286,348 | 21,286,414 | 7  | 0 | 0  | yes |    |
| at_locus.10084 | 5 | 21,440,975 | 21,441,125 | 4  | 0 | 0  | yes |    |
| at_locus.10085 | 5 | 21,473,360 | 21,474,025 | 34 | 1 | 8  | yes |    |
| at_locus.10086 | 5 | 21,484,047 | 21,484,142 | 4  | 0 | 4  | no  |    |
| at_locus.10087 | 5 | 21,484,785 | 21,485,376 | 13 | 0 | 11 | yes |    |
| at_locus.10088 | 5 | 21,485,964 | 21,486,148 | 7  | 0 | 4  | yes |    |
| at_locus.10089 | 5 | 21,547,315 | 21,547,400 | 11 | 0 | 0  | no  | TE |
| at_locus.10090 | 5 | 21,548,354 | 21,549,132 | 22 | 1 | 1  | no  | TE |
| at_locus.10091 | 5 | 21,570,043 | 21,570,405 | 10 | 0 | 0  | yes |    |
| at_locus.10092 | 5 | 21,601,518 | 21,601,658 | 11 | 1 | 1  | no  | TE |
| at_locus.10093 | 5 | 21,685,281 | 21,685,318 | 10 | 0 | 0  | no  |    |
| at_locus.10094 | 5 | 21,713,877 | 21,714,682 | 39 | 0 | 10 | yes |    |
| at_locus.10095 | 5 | 21,717,086 | 21,717,111 | 4  | 0 | 0  | yes |    |
| at_locus.10096 | 5 | 21,792,918 | 21,793,270 | 6  | 0 | 0  | no  | TE |
| at_locus.10097 | 5 | 21,793,631 | 21,793,779 | 18 | 0 | 0  | no  | TE |
| at_locus.10098 | 5 | 21,796,109 | 21,796,614 | 11 | 0 | 0  | yes |    |
| at_locus.10099 | 5 | 21,820,535 | 21,821,203 | 20 | 0 | 10 | yes | TE |
| at_locus.10100 | 5 | 21,828,993 | 21,829,101 | 1  | 4 | 0  | no  |    |
| at_locus.10101 | 5 | 21,831,258 | 21,831,366 | 1  | 4 | 0  | no  |    |
| at_locus.10102 | 5 | 21,854,400 | 21,855,344 | 74 | 1 | 11 | yes |    |
| at_locus.10103 | 5 | 21,863,719 | 21,864,207 | 64 | 2 | 1  | yes |    |
| at_locus.10104 | 5 | 21,864,619 | 21,864,924 | 31 | 1 | 30 | yes |    |
| at_locus.10106 | 5 | 21,959,658 | 21,959,796 | 4  | 0 | 0  | yes |    |
| at_locus.10108 | 5 | 22,019,266 | 22,019,538 | 28 | 0 | 0  | no  | TE |
| at_locus.10109 | 5 | 22,019,835 | 22,020,145 | 1  | 0 | 5  | no  | TE |

|                |   |            |            |    |    |    |     |    |
|----------------|---|------------|------------|----|----|----|-----|----|
| at_locus.10110 | 5 | 22,020,537 | 22,021,042 | 2  | 0  | 5  | no  | TE |
| at_locus.10111 | 5 | 22,022,393 | 22,022,562 | 5  | 0  | 0  | no  | TE |
| at_locus.10112 | 5 | 22,023,525 | 22,023,947 | 1  | 0  | 4  | no  | TE |
| at_locus.10113 | 5 | 22,023,953 | 22,024,061 | 9  | 0  | 0  | yes | TE |
| at_locus.10114 | 5 | 22,037,997 | 22,038,287 | 8  | 0  | 0  | yes | TE |
| at_locus.10117 | 5 | 22,111,393 | 22,112,176 | 11 | 0  | 10 | yes |    |
| at_locus.10118 | 5 | 22,127,629 | 22,127,985 | 9  | 0  | 5  | yes |    |
| at_locus.10119 | 5 | 22,154,277 | 22,154,466 | 7  | 0  | 0  | no  | TE |
| at_locus.10120 | 5 | 22,155,230 | 22,155,302 | 6  | 0  | 0  | yes | TE |
| at_locus.10121 | 5 | 22,182,157 | 22,182,677 | 17 | 1  | 9  | yes |    |
| at_locus.10122 | 5 | 22,240,332 | 22,240,383 | 5  | 0  | 0  | no  |    |
| at_locus.10123 | 5 | 22,248,297 | 22,248,626 | 33 | 2  | 0  | yes | TE |
| at_locus.10124 | 5 | 22,248,862 | 22,249,010 | 9  | 0  | 0  | no  | TE |
| at_locus.10125 | 5 | 22,249,238 | 22,249,315 | 4  | 1  | 0  | no  | TE |
| at_locus.10126 | 5 | 22,264,426 | 22,264,863 | 3  | 13 | 5  | yes |    |
| at_locus.10127 | 5 | 22,289,287 | 22,289,390 | 6  | 0  | 0  | yes |    |
| at_locus.10128 | 5 | 22,336,745 | 22,336,762 | 1  | 1  | 8  | no  |    |
| at_locus.10129 | 5 | 22,339,960 | 22,340,164 | 13 | 50 | 47 | yes |    |
| at_locus.10130 | 5 | 22,352,442 | 22,352,760 | 25 | 0  | 1  | no  | TE |
| at_locus.10131 | 5 | 22,409,058 | 22,409,100 | 4  | 0  | 0  | yes |    |
| at_locus.10132 | 5 | 22,458,272 | 22,458,420 | 11 | 0  | 1  | yes |    |
| at_locus.10133 | 5 | 22,458,681 | 22,459,372 | 34 | 1  | 10 | yes |    |
| at_locus.10134 | 5 | 22,480,903 | 22,480,958 | 5  | 0  | 0  | no  | TE |
| at_locus.10135 | 5 | 22,481,302 | 22,481,426 | 6  | 0  | 0  | no  | TE |
| at_locus.10137 | 5 | 22,527,996 | 22,528,214 | 12 | 0  | 2  | yes | TE |
| at_locus.10138 | 5 | 22,529,657 | 22,530,149 | 23 | 1  | 7  | yes | TE |
| at_locus.10139 | 5 | 22,531,145 | 22,531,506 | 8  | 1  | 0  | yes |    |
| at_locus.10140 | 5 | 22,551,862 | 22,552,315 | 13 | 0  | 4  | yes |    |
| at_locus.10141 | 5 | 22,614,313 | 22,614,333 | 7  | 41 | 8  | yes |    |
| at_locus.10142 | 5 | 22,633,231 | 22,633,418 | 4  | 0  | 0  | no  | TE |
| at_locus.10143 | 5 | 22,638,081 | 22,638,172 | 6  | 0  | 1  | no  | TE |
| at_locus.10144 | 5 | 22,638,406 | 22,638,618 | 17 | 0  | 0  | no  | TE |
| at_locus.10145 | 5 | 22,660,038 | 22,660,145 | 4  | 0  | 0  | yes |    |
| at_locus.10146 | 5 | 22,691,545 | 22,691,704 | 17 | 0  | 1  | yes |    |
| at_locus.10147 | 5 | 22,692,559 | 22,692,655 | 1  | 0  | 6  | yes |    |
| at_locus.10148 | 5 | 22,718,551 | 22,718,847 | 1  | 0  | 5  | no  |    |
| at_locus.10149 | 5 | 22,722,492 | 22,722,890 | 48 | 3  | 40 | yes |    |

|                |   |            |            |     |     |     |     |    |
|----------------|---|------------|------------|-----|-----|-----|-----|----|
| at_locus.10150 | 5 | 22,723,191 | 22,723,522 | 42  | 2   | 28  | yes |    |
| at_locus.10151 | 5 | 22,723,958 | 22,724,422 | 57  | 1   | 23  | yes |    |
| at_locus.10152 | 5 | 22,724,965 | 22,725,194 | 84  | 3   | 41  | yes |    |
| at_locus.10153 | 5 | 22,725,569 | 22,726,504 | 197 | 9   | 153 | yes |    |
| at_locus.10154 | 5 | 22,763,914 | 22,764,108 | 8   | 0   | 0   | yes |    |
| at_locus.10155 | 5 | 22,819,077 | 22,819,214 | 6   | 0   | 0   | yes |    |
| at_locus.10156 | 5 | 22,846,035 | 22,846,206 | 0   | 1   | 5   | yes |    |
| at_locus.10157 | 5 | 22,850,814 | 22,850,845 | 4   | 0   | 0   | no  |    |
| at_locus.10158 | 5 | 22,858,343 | 22,858,549 | 13  | 0   | 0   | yes |    |
| at_locus.10159 | 5 | 22,928,264 | 22,929,092 | 37  | 0   | 4   | yes | TE |
| at_locus.10160 | 5 | 22,929,880 | 22,930,148 | 3   | 0   | 4   | no  | TE |
| at_locus.10161 | 5 | 22,930,469 | 22,931,420 | 20  | 0   | 8   | no  | TE |
| at_locus.10162 | 5 | 22,931,692 | 22,932,027 | 36  | 0   | 2   | no  | TE |
| at_locus.10163 | 5 | 22,932,399 | 22,933,373 | 56  | 4   | 15  | no  | TE |
| at_locus.10164 | 5 | 23,041,835 | 23,042,278 | 14  | 0   | 0   | yes |    |
| at_locus.10165 | 5 | 23,043,272 | 23,043,447 | 19  | 1   | 2   | no  | TE |
| at_locus.10166 | 5 | 23,044,217 | 23,044,519 | 4   | 0   | 8   | yes | TE |
| at_locus.10167 | 5 | 23,063,898 | 23,064,070 | 5   | 0   | 0   | yes |    |
| at_locus.10169 | 5 | 23,152,346 | 23,152,544 | 2   | 0   | 2   | no  | TE |
| at_locus.10170 | 5 | 23,154,109 | 23,154,277 | 0   | 0   | 4   | yes | TE |
| at_locus.10171 | 5 | 23,154,609 | 23,154,636 | 4   | 0   | 0   | no  | TE |
| at_locus.10172 | 5 | 23,155,244 | 23,155,484 | 0   | 0   | 6   | yes | TE |
| at_locus.10173 | 5 | 23,156,640 | 23,157,086 | 8   | 0   | 5   | no  | TE |
| at_locus.10174 | 5 | 23,324,374 | 23,324,607 | 0   | 5   | 0   | yes |    |
| at_locus.10175 | 5 | 23,410,395 | 23,410,428 | 9   | 0   | 0   | yes |    |
| at_locus.10176 | 5 | 23,411,501 | 23,411,676 | 5   | 5   | 3   | yes |    |
| at_locus.10177 | 5 | 23,448,622 | 23,448,703 | 0   | 5   | 7   | no  |    |
| at_locus.10178 | 5 | 23,448,788 | 23,449,400 | 45  | 0   | 1   | no  | TE |
| at_locus.10179 | 5 | 23,449,677 | 23,449,955 | 7   | 0   | 0   | no  | TE |
| at_locus.10180 | 5 | 23,465,072 | 23,465,136 | 0   | 0   | 5   | no  |    |
| at_locus.10181 | 5 | 23,522,157 | 23,522,365 | 3   | 5   | 4   | yes |    |
| at_locus.10182 | 5 | 23,609,884 | 23,610,098 | 12  | 0   | 3   | yes |    |
| at_locus.10183 | 5 | 23,654,186 | 23,654,280 | 297 | 671 | 180 | yes |    |
| at_locus.10184 | 5 | 23,671,992 | 23,672,036 | 6   | 0   | 0   | yes |    |
| at_locus.10185 | 5 | 23,780,531 | 23,780,569 | 14  | 0   | 0   | yes |    |
| at_locus.10186 | 5 | 23,791,549 | 23,792,886 | 60  | 0   | 24  | yes | TE |
| at_locus.10187 | 5 | 24,005,710 | 24,005,816 | 12  | 46  | 39  | yes |    |



|                |   |            |            |    |    |   |     |    |
|----------------|---|------------|------------|----|----|---|-----|----|
| at_locus.10188 | 5 | 24,019,417 | 24,019,791 | 41 | 0  | 1 | no  | TE |
| at_locus.10189 | 5 | 24,020,207 | 24,020,472 | 12 | 0  | 0 | no  | TE |
| at_locus.10190 | 5 | 24,040,009 | 24,040,281 | 2  | 0  | 4 | no  |    |
| at_locus.10191 | 5 | 24,044,545 | 24,044,641 | 4  | 0  | 3 | no  | TE |
| at_locus.10192 | 5 | 24,128,047 | 24,128,293 | 4  | 0  | 0 | no  |    |
| at_locus.10193 | 5 | 24,135,188 | 24,135,255 | 9  | 0  | 0 | no  | TE |
| at_locus.10194 | 5 | 24,203,053 | 24,203,307 | 10 | 1  | 0 | yes | TE |
| at_locus.10195 | 5 | 24,203,823 | 24,203,895 | 11 | 0  | 0 | no  | TE |
| at_locus.10196 | 5 | 24,204,146 | 24,204,433 | 7  | 2  | 0 | no  | TE |
| at_locus.10197 | 5 | 24,204,674 | 24,204,703 | 0  | 0  | 4 | no  | TE |
| at_locus.10198 | 5 | 24,205,065 | 24,205,094 | 4  | 0  | 0 | no  | TE |
| at_locus.10199 | 5 | 24,310,386 | 24,310,464 | 12 | 40 | 4 | yes |    |
| at_locus.10200 | 5 | 24,331,599 | 24,331,723 | 7  | 0  | 0 | no  | TE |
| at_locus.10201 | 5 | 24,361,317 | 24,361,520 | 4  | 0  | 0 | yes | TE |
| at_locus.10202 | 5 | 24,361,829 | 24,362,313 | 2  | 0  | 0 | no  | TE |
| at_locus.10203 | 5 | 24,396,183 | 24,396,211 | 5  | 0  | 0 | yes |    |
| at_locus.10204 | 5 | 24,453,116 | 24,453,203 | 4  | 0  | 1 | yes | TE |
| at_locus.10205 | 5 | 24,453,741 | 24,453,824 | 5  | 0  | 0 | no  | TE |
| at_locus.10206 | 5 | 24,466,042 | 24,466,599 | 57 | 1  | 1 | yes | TE |
| at_locus.10207 | 5 | 24,492,519 | 24,493,242 | 18 | 0  | 0 | no  | TE |
| at_locus.10208 | 5 | 24,544,148 | 24,544,223 | 7  | 0  | 1 | yes |    |
| at_locus.10209 | 5 | 24,548,400 | 24,548,474 | 19 | 0  | 1 | yes |    |
| at_locus.10210 | 5 | 24,603,890 | 24,604,292 | 27 | 0  | 0 | yes | TE |
| at_locus.10211 | 5 | 24,618,611 | 24,618,652 | 5  | 0  | 0 | no  | TE |
| at_locus.10212 | 5 | 24,671,641 | 24,671,769 | 0  | 4  | 2 | yes |    |
| at_locus.10213 | 5 | 24,712,869 | 24,713,286 | 9  | 0  | 1 | no  | TE |
| at_locus.10214 | 5 | 24,718,913 | 24,718,930 | 0  | 4  | 0 | no  |    |
| at_locus.10215 | 5 | 24,720,945 | 24,721,091 | 11 | 0  | 0 | no  |    |
| at_locus.10218 | 5 | 24,836,004 | 24,836,176 | 68 | 1  | 4 | no  | TE |
| at_locus.10219 | 5 | 24,837,260 | 24,837,392 | 22 | 0  | 0 | yes | TE |
| at_locus.10220 | 5 | 24,925,990 | 24,926,205 | 6  | 0  | 0 | yes |    |
| at_locus.10221 | 5 | 24,961,185 | 24,961,445 | 0  | 0  | 3 | yes |    |
| at_locus.10222 | 5 | 24,979,723 | 24,979,814 | 3  | 4  | 1 | yes |    |
| at_locus.10223 | 5 | 24,983,768 | 24,983,859 | 22 | 0  | 0 | yes |    |
| at_locus.10224 | 5 | 24,988,127 | 24,988,518 | 12 | 0  | 0 | yes |    |
| at_locus.10225 | 5 | 25,011,424 | 25,011,519 | 10 | 0  | 0 | yes | TE |
| at_locus.10226 | 5 | 25,065,933 | 25,066,059 | 4  | 0  | 0 | yes | TE |

|                |   |            |            |    |     |     |     |    |
|----------------|---|------------|------------|----|-----|-----|-----|----|
| at_locus.10227 | 5 | 25,196,017 | 25,196,168 | 5  | 0   | 0   | no  | TE |
| at_locus.10228 | 5 | 25,281,654 | 25,281,968 | 17 | 0   | 0   | no  | TE |
| at_locus.10229 | 5 | 25,282,309 | 25,282,561 | 9  | 0   | 1   | yes | TE |
| at_locus.10230 | 5 | 25,296,825 | 25,296,926 | 11 | 38  | 13  | no  |    |
| at_locus.10231 | 5 | 25,504,180 | 25,504,496 | 7  | 0   | 6   | yes |    |
| at_locus.10232 | 5 | 25,522,108 | 25,522,129 | 73 | 439 | 197 | no  |    |
| at_locus.10233 | 5 | 25,841,062 | 25,841,488 | 3  | 0   | 8   | yes |    |
| at_locus.10234 | 5 | 25,861,828 | 25,862,097 | 5  | 0   | 0   | no  | TE |
| at_locus.10235 | 5 | 25,921,954 | 25,922,180 | 4  | 0   | 0   | yes | TE |
| at_locus.10236 | 5 | 25,922,406 | 25,922,839 | 15 | 1   | 1   | no  | TE |
| at_locus.10237 | 5 | 25,985,760 | 25,985,836 | 11 | 0   | 0   | yes |    |
| at_locus.10238 | 5 | 26,032,577 | 26,032,983 | 17 | 0   | 1   | no  | TE |
| at_locus.10239 | 5 | 26,087,065 | 26,087,489 | 13 | 1   | 5   | yes | TE |
| at_locus.10240 | 5 | 26,089,385 | 26,090,182 | 4  | 0   | 0   | yes |    |
| at_locus.10241 | 5 | 26,226,729 | 26,226,912 | 4  | 0   | 1   | no  | TE |
| at_locus.10242 | 5 | 26,227,119 | 26,227,211 | 4  | 0   | 1   | yes | TE |
| at_locus.10243 | 5 | 26,250,610 | 26,250,772 | 8  | 0   | 1   | yes |    |
| at_locus.10244 | 5 | 26,306,778 | 26,306,803 | 6  | 0   | 0   | yes |    |
| at_locus.10245 | 5 | 26,367,027 | 26,367,051 | 0  | 0   | 4   | yes |    |
| at_locus.10246 | 5 | 26,428,820 | 26,428,881 | 3  | 19  | 16  | yes |    |
| at_locus.10247 | 5 | 26,432,617 | 26,432,712 | 8  | 0   | 0   | yes | TE |
| at_locus.10248 | 5 | 26,468,446 | 26,468,466 | 0  | 1   | 12  | yes |    |
| at_locus.10249 | 5 | 26,482,070 | 26,482,337 | 25 | 0   | 0   | yes |    |
| at_locus.10250 | 5 | 26,500,467 | 26,501,647 | 31 | 0   | 4   | no  | TE |
| at_locus.10251 | 5 | 26,502,065 | 26,502,197 | 4  | 0   | 1   | no  | TE |
| at_locus.10252 | 5 | 26,502,462 | 26,502,536 | 21 | 0   | 2   | no  | TE |
| at_locus.10253 | 5 | 26,572,850 | 26,572,878 | 1  | 17  | 5   | no  |    |
| at_locus.10255 | 5 | 26,687,714 | 26,687,847 | 4  | 0   | 0   | yes |    |
| at_locus.10256 | 5 | 26,804,334 | 26,804,543 | 16 | 0   | 0   | no  | TE |
| at_locus.10257 | 5 | 26,909,523 | 26,909,848 | 4  | 0   | 0   | no  | TE |
| at_locus.10258 | 5 | 26,910,482 | 26,910,623 | 8  | 0   | 0   | no  | TE |
| at_locus.10259 | 5 | 26,966,898 | 26,966,998 | 0  | 4   | 4   | no  |    |
