# Supplementary material
Source: PubMed Central journal article supplement (PMC2268599)
Supplement: pnas_0709632105_5.pdf [file pnas_0709632105_5.pdf]

**Table 3. Bisulfite sequencing data**

| Locus 00687       | first replicate<br>% methylation ( $\pm$ SD) |                |                |                 | second replicate<br>% methylation ( $\pm$ SD) |                |                |                 |
|-------------------|----------------------------------------------|----------------|----------------|-----------------|-----------------------------------------------|----------------|----------------|-----------------|
|                   | n                                            | CG (7)         | CnG(5)         | Cnn(26)         | n                                             | CG (7)         | CnG(5)         | Cnn(26)         |
| wt                | 6                                            | 100 ( $\pm$ 0) | 62 ( $\pm$ 20) | 48 ( $\pm$ 21)  | 4                                             | 89 ( $\pm$ 11) | 62 ( $\pm$ 11) | 45 ( $\pm$ 7)   |
| nrpd1a            | 8                                            | 100 ( $\pm$ 0) | 48 ( $\pm$ 18) | 15 ( $\pm$ 18)  | 8                                             | 91 ( $\pm$ 12) | 56 ( $\pm$ 34) | 14 ( $\pm$ 14)  |
| nrpd1b            | 11                                           | 100 ( $\pm$ 0) | 36 ( $\pm$ 9)  | 25 ( $\pm$ 16)  | 6                                             | 93 ( $\pm$ 7)  | 42 ( $\pm$ 13) | 16 ( $\pm$ 11)  |
| p value (wt v 1a) |                                              | -              | 0.2897         | <b>1.39E-07</b> |                                               | 0.6488         | 0.7142         | <b>3.63E-12</b> |
| p value (wt v 1b) |                                              | -              | 0.0309         | <b>4.10E-05</b> |                                               | 0.4227         | 0.0386         | <b>9.57E-13</b> |

  

| Locus 08002       | first replicate<br>% methylation ( $\pm$ SD) |                |                |                 | second replicate<br>% methylation ( $\pm$ SD) |               |                |                 |
|-------------------|----------------------------------------------|----------------|----------------|-----------------|-----------------------------------------------|---------------|----------------|-----------------|
|                   | n                                            | CG (15)        | CnG(16)        | Cnn(78)         | n                                             | CG (15)       | CnG(16)        | Cnn(78)         |
| wt                | 12                                           | 94 ( $\pm$ 9)  | 67 ( $\pm$ 15) | 44 ( $\pm$ 15)  | 14                                            | 93 ( $\pm$ 7) | 62 ( $\pm$ 21) | 29 ( $\pm$ 10)  |
| nrpd1a            | 16                                           | 100 ( $\pm$ 0) | 72 ( $\pm$ 35) | 71 ( $\pm$ 29)  | 12                                            | 98 ( $\pm$ 6) | 59 ( $\pm$ 28) | 36 ( $\pm$ 15)  |
| nrpd1b            | 7                                            | 93 ( $\pm$ 20) | 84 ( $\pm$ 21) | 71 ( $\pm$ 33)  | 6                                             | 99 ( $\pm$ 3) | 85 ( $\pm$ 16) | 82 ( $\pm$ 15)  |
| p value (wt v 1a) |                                              | 0.0151         | 0.7039         | <b>1.64E-11</b> |                                               | 0.0764        | 0.763          | <b>3.15E-04</b> |
| p value (wt v 1b) |                                              | 0.9352         | 0.0115         | <b>9.54E-10</b> |                                               | 0.0114        | <b>0.0014</b>  | <b>4.99E-58</b> |

  

| Locus 10102       | first replicate<br>% methylation ( $\pm$ SD) |                |                |                | second replicate<br>% methylation ( $\pm$ SD) |                |                |                |
|-------------------|----------------------------------------------|----------------|----------------|----------------|-----------------------------------------------|----------------|----------------|----------------|
|                   | n                                            | CG (5)         | CnG(4)         | Cnn(56)        | n                                             | CG (5)         | CnG(4)         | Cnn(56)        |
| wt                | 4                                            | 85 ( $\pm$ 14) | 100 ( $\pm$ 0) | 81 ( $\pm$ 26) | 12                                            | 98 ( $\pm$ 4)  | 100 ( $\pm$ 0) | 87 ( $\pm$ 32) |
| nrpd1a            | 3                                            | 96 ( $\pm$ 5)  | 98 ( $\pm$ 5)  | 92 ( $\pm$ 17) | 9                                             | 100 ( $\pm$ 0) | 100 ( $\pm$ 0) | 86 ( $\pm$ 35) |
| nrpd1b            | 12                                           | 86 ( $\pm$ 26) | 92 ( $\pm$ 19) | 90 ( $\pm$ 24) | 5                                             | 100 ( $\pm$ 0) | 97 ( $\pm$ 6)  | 85 ( $\pm$ 25) |
| p value (wt v 1a) |                                              | 0.1180         | 0.3559         | 0.0159         |                                               | 0.3466         | -              | 0.8589         |
| p value (wt v 1b) |                                              | 0.8956         | 0.3559         | 0.0543         |                                               | 0.3466         | 0.3559         | 0.7809         |

  

| Locus 04138       | first replicate<br>% methylation ( $\pm$ SD) |                |                |                | second replicate<br>% methylation ( $\pm$ SD) |                |                |                |
|-------------------|----------------------------------------------|----------------|----------------|----------------|-----------------------------------------------|----------------|----------------|----------------|
|                   | n                                            | CG (10)        | CnG(9)         | Cnn(63)        | n                                             | CG (10)        | CnG(9)         | Cnn(63)        |
| wt                | 12                                           | 38 ( $\pm$ 24) | 65 ( $\pm$ 25) | 65 ( $\pm$ 23) | 8                                             | 50 ( $\pm$ 16) | 72 ( $\pm$ 24) | 69 ( $\pm$ 17) |
| nrpd1a            | 16                                           | 57 ( $\pm$ 20) | 75 ( $\pm$ 15) | 75 ( $\pm$ 13) | 15                                            | 34 ( $\pm$ 17) | 53 ( $\pm$ 17) | 59 ( $\pm$ 18) |
| nrpd1b            | 15                                           | 42 ( $\pm$ 37) | 70 ( $\pm$ 28) | 73 ( $\pm$ 24) | 14                                            | 50 ( $\pm$ 33) | 73 ( $\pm$ 23) | 73 ( $\pm$ 20) |
| p value (wt v 1a) |                                              | 0.0694         | 0.2958         | <b>0.0017</b>  |                                               | 0.0379         | 0.0510         | <b>0.0015</b>  |
| p value (wt v 1b) |                                              | 0.7888         | 0.7129         | 0.0541         |                                               | 0.9798         | 0.9476         | 0.2522         |
