# Supplementary material
Source: PubMed Central journal article supplement (PMC2268599)
Supplement: pnas_0709632105_6.pdf [file pnas_0709632105_6.pdf]

**Table 4. Adapters and primers.**

| <b>Cloning adapters*</b> |                                                                                   |
|--------------------------|-----------------------------------------------------------------------------------|
| ADAPTER-5                | TGGGAATTCCTCACTaaa                                                                |
| ADAPTER-5.2              | TGGGAATTCCTCATGaaa                                                                |
| ADAPTER-3.454A           | uuuCAATCCATGGACTGT                                                                |
| ADAPTER-3.454B           | uuuATATCCATGGACTGT                                                                |
| ADAPTER-3.454C           | uuuTGATCCATGGACTGT                                                                |
| ADAPTER-3.454D           | uuuGCATCCATGGACTGT                                                                |
| <b>Cloning primers</b>   |                                                                                   |
| 454for                   | GCCTCCCTCGCGCCATCAGTGGGAATTCCTCACT                                                |
| 454for2                  | GCCTCCCTCGCGCCATCAGTGGGAATTCCTCATG                                                |
| 454revA                  | GCCTTGCCAGCCCGCTCAGACAGTCCATGGATTG                                                |
| 454revB                  | GCCTTGCCAGCCCGCTCAGACAGTCCATGGATAT                                                |
| 454revC                  | GCCTTGCCAGCCCGCTCAGACAGTCCATGGATCA                                                |
| 454revD                  | GCCTTGCCAGCCCGCTCAGACAGTCCATGGATGC                                                |
| <b>Riboprobe primers</b> |                                                                                   |
| Locus 04138              | ACACACAAC TATTTTGCCC<br>CCCTAATACGACTCACTATAGGGAGACAAGATGAATCAAAC TTTGTCTC        |
| Locus 10102              | GAAGGAAGTGACATGTGG<br>CCCTAATACGACTCACTATAGGGAGACCACATGTCACTTCCTTC                |
| Locus 01813              | AAGCGGAGGTGGCAAAAAC TG<br>CCCTAATACGACTCACTATAGGGAGACCCAAGCCGATGTCCTCTTTG         |
| Locus 08127              | CTAATGACCTAAAT TGAAGACC<br>CCCTAATACGACTCACTATAGGGAGATCGTGGATAGATTTTAGTGG         |
| Locus 07316              | CACATATACACTAAAAC TAATGGG<br>CCCTAATACGACTCACTATAGGGAGACATCAAGAAT T GATTGGTTATTCC |
| Locus 00550              | GAGGCACGAAAACCGATTGG<br>CCTAATACGACTCACTATAGGGAGAAGACGAAAC TTTGTATCGG             |

|                          |                                                                         |
|--------------------------|-------------------------------------------------------------------------|
| Locus 02209              | GAGGACCAAAATATCGTTG<br>CCCTAATACGACTCACTATAGGGAGACCCAATATGTTAAGAAC      |
| Locus 02815              | GAGATGAGTGTTAAAAGCATC<br>CCCTAATACGACTCACTATAGGGAGACAACCAAAAAGTACGGAAG  |
| Locus 05902              | AGGCGCTGACATCGTAGATCG<br>CCCTAATACGACTCACTATAGGGAGACAACAACAGATCAGATTCTG |
| Locus 08002              | AGACAAAAGGTTCTTGAAG<br>CCCTAATACGACTCACTATAGGGAGAGAGAGAGATATATAG        |
| Locus 00687              | GAGCGCACTAATTGTTATTTT<br>CCCTAATACGACTCACTATAGGGAGAAACCAACTGCTGTAGG     |
| <b>Bisulfite primers</b> |                                                                         |
| Locus 10102              | CATCCACATRTCAC TTCCTTCTTTCTTC<br>ATTAARTTATAAACRARRTRCTAAAATCAC         |
| Locus 04138              | TTAAAAC TTATACACACA ACTATTTTRCCC<br>TTTTTAAARATATRTACAAAATTTTAACATC     |
| Locus 08002              | CTAAAAARACCR TAACCCTAATTTTCACAC<br>ATCATAAATCTACATATCTARAACRTAC         |
| Locus 00687              | TCTCTCCRTTATTCTCTTTTTCR TTTTCTC<br>ATTATTTTAATAATRARTTTTTRARCRCAC       |

\*lower case letters are RNA, uppercase are DNA
