# Supplementary material
Source: PubMed Central journal article supplement (PMC2268599)

# Locus 08002 5:3752082..3752819

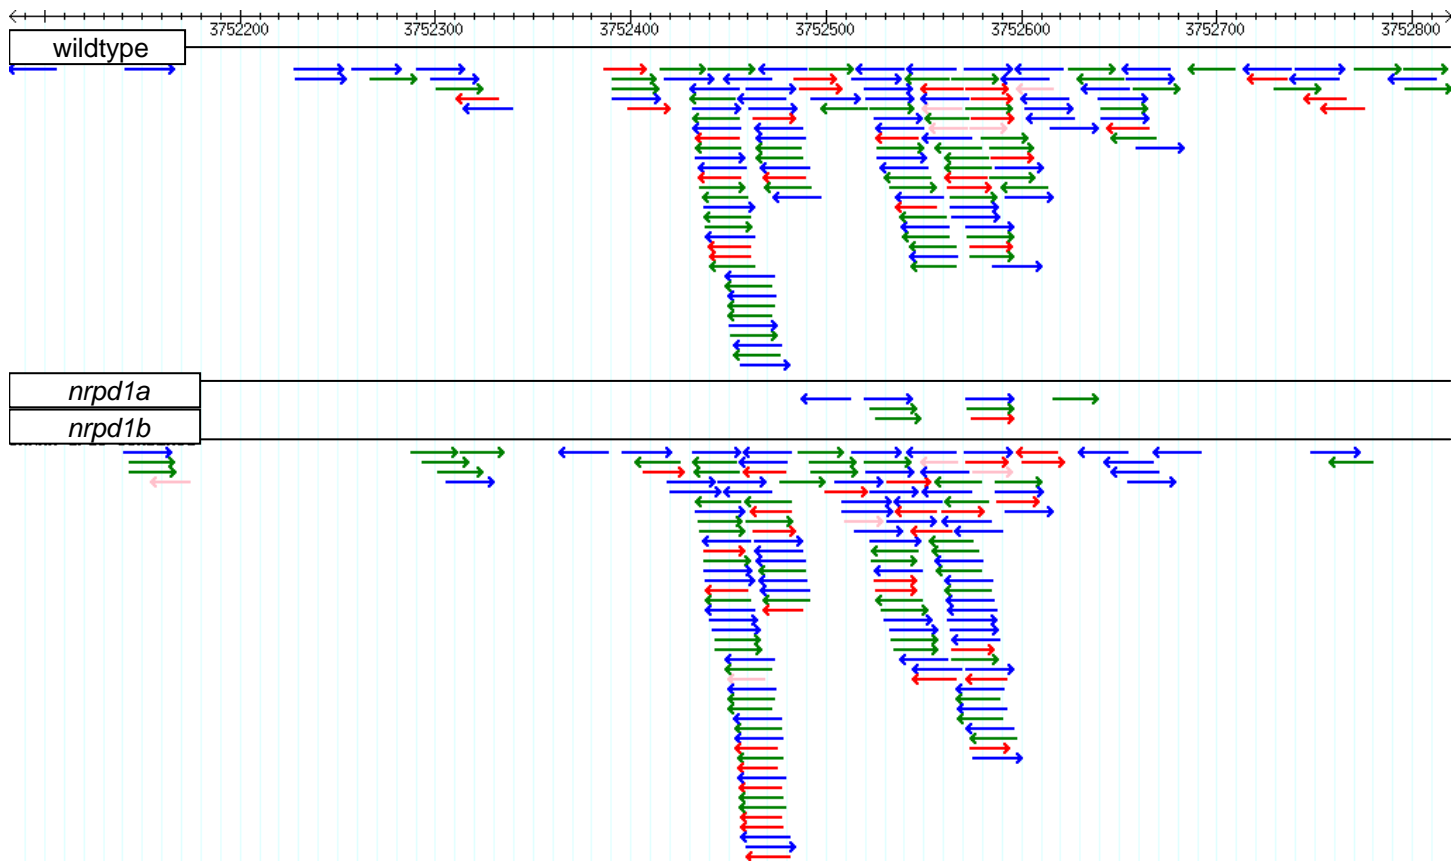

# Locus 00687 1:12727626..12728966

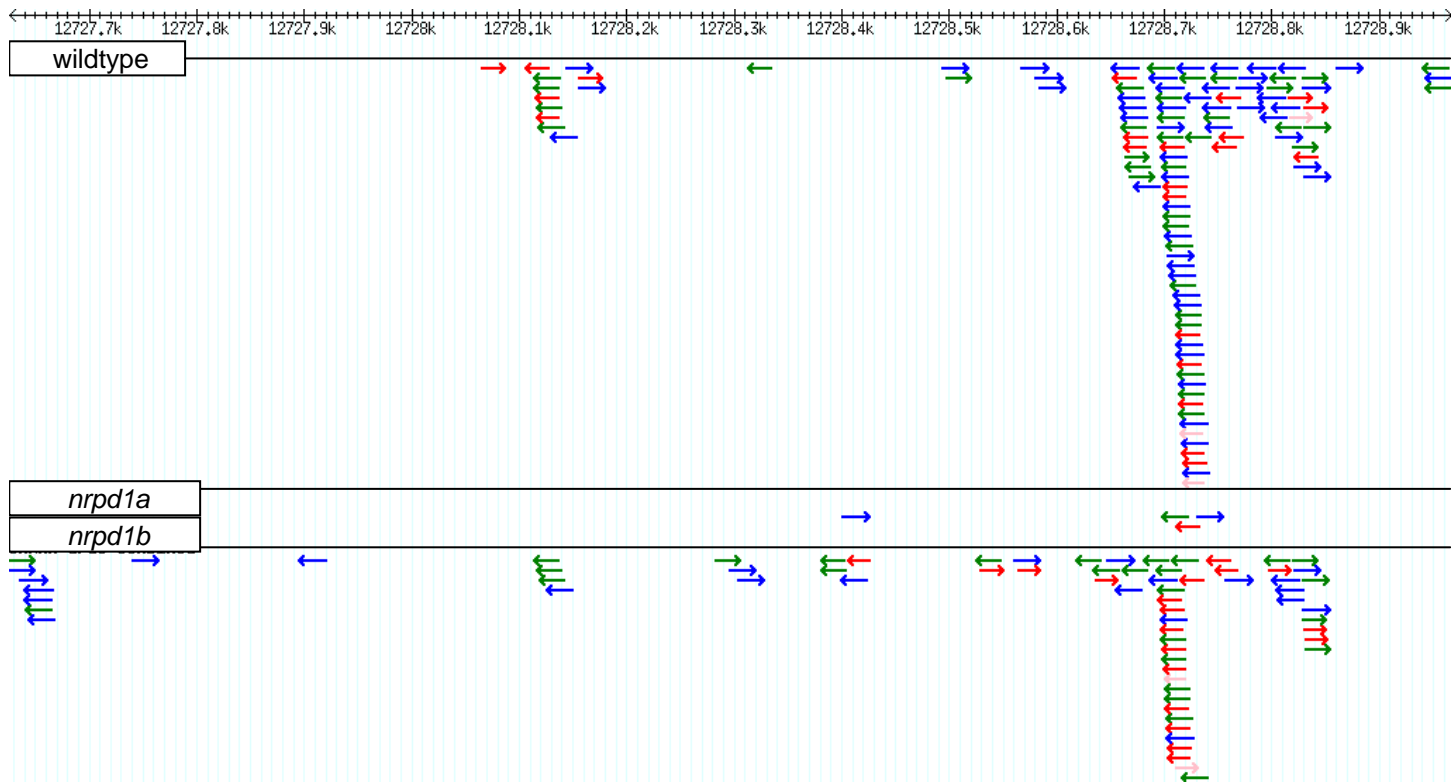

# Locus 00550 1:11619109..11619597

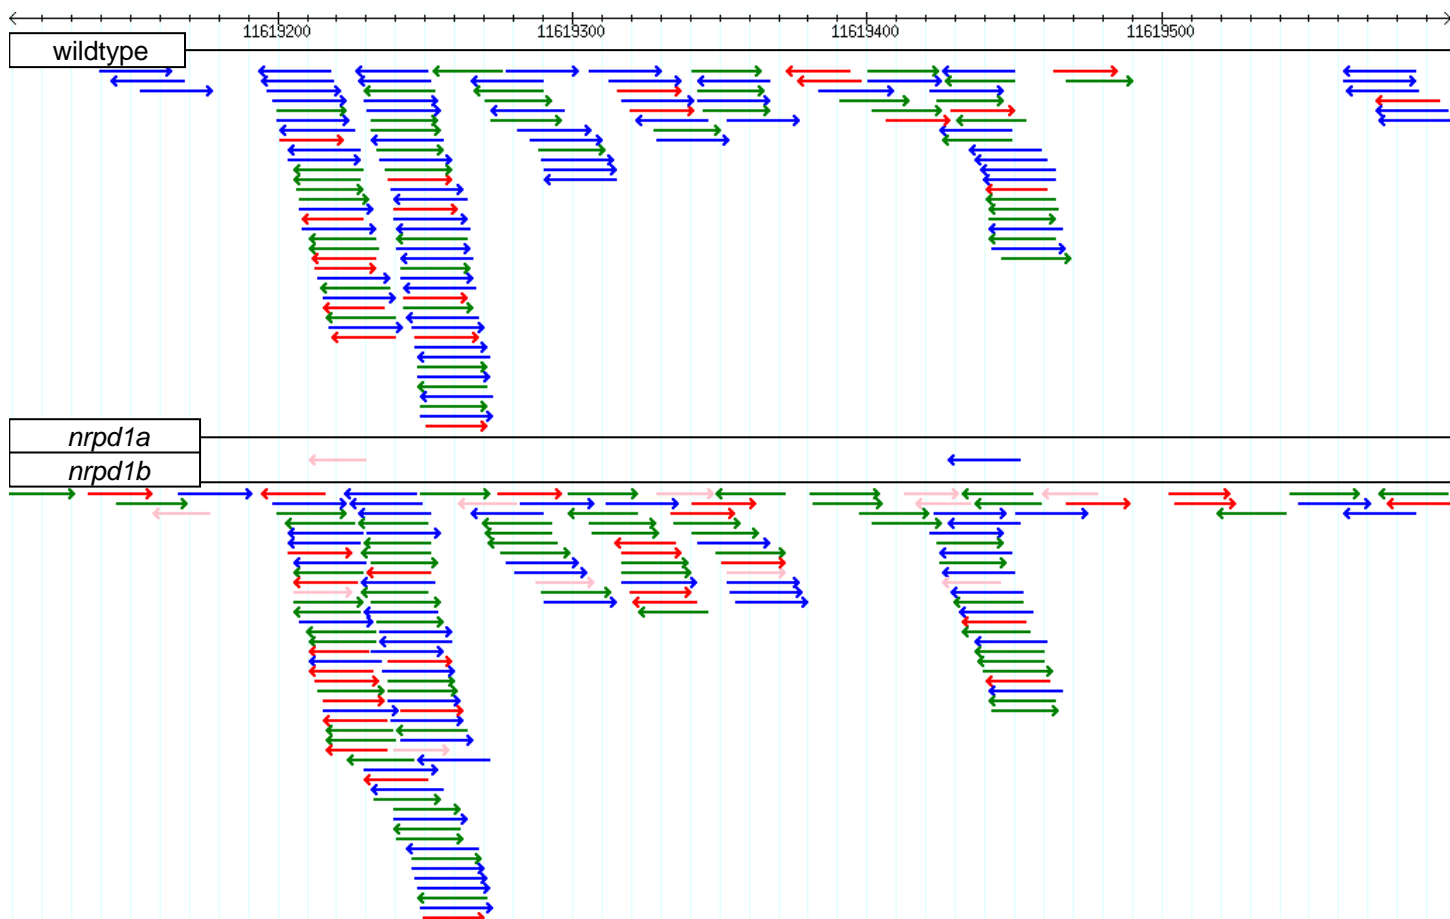

Locus 02815 2:2866642..2867057

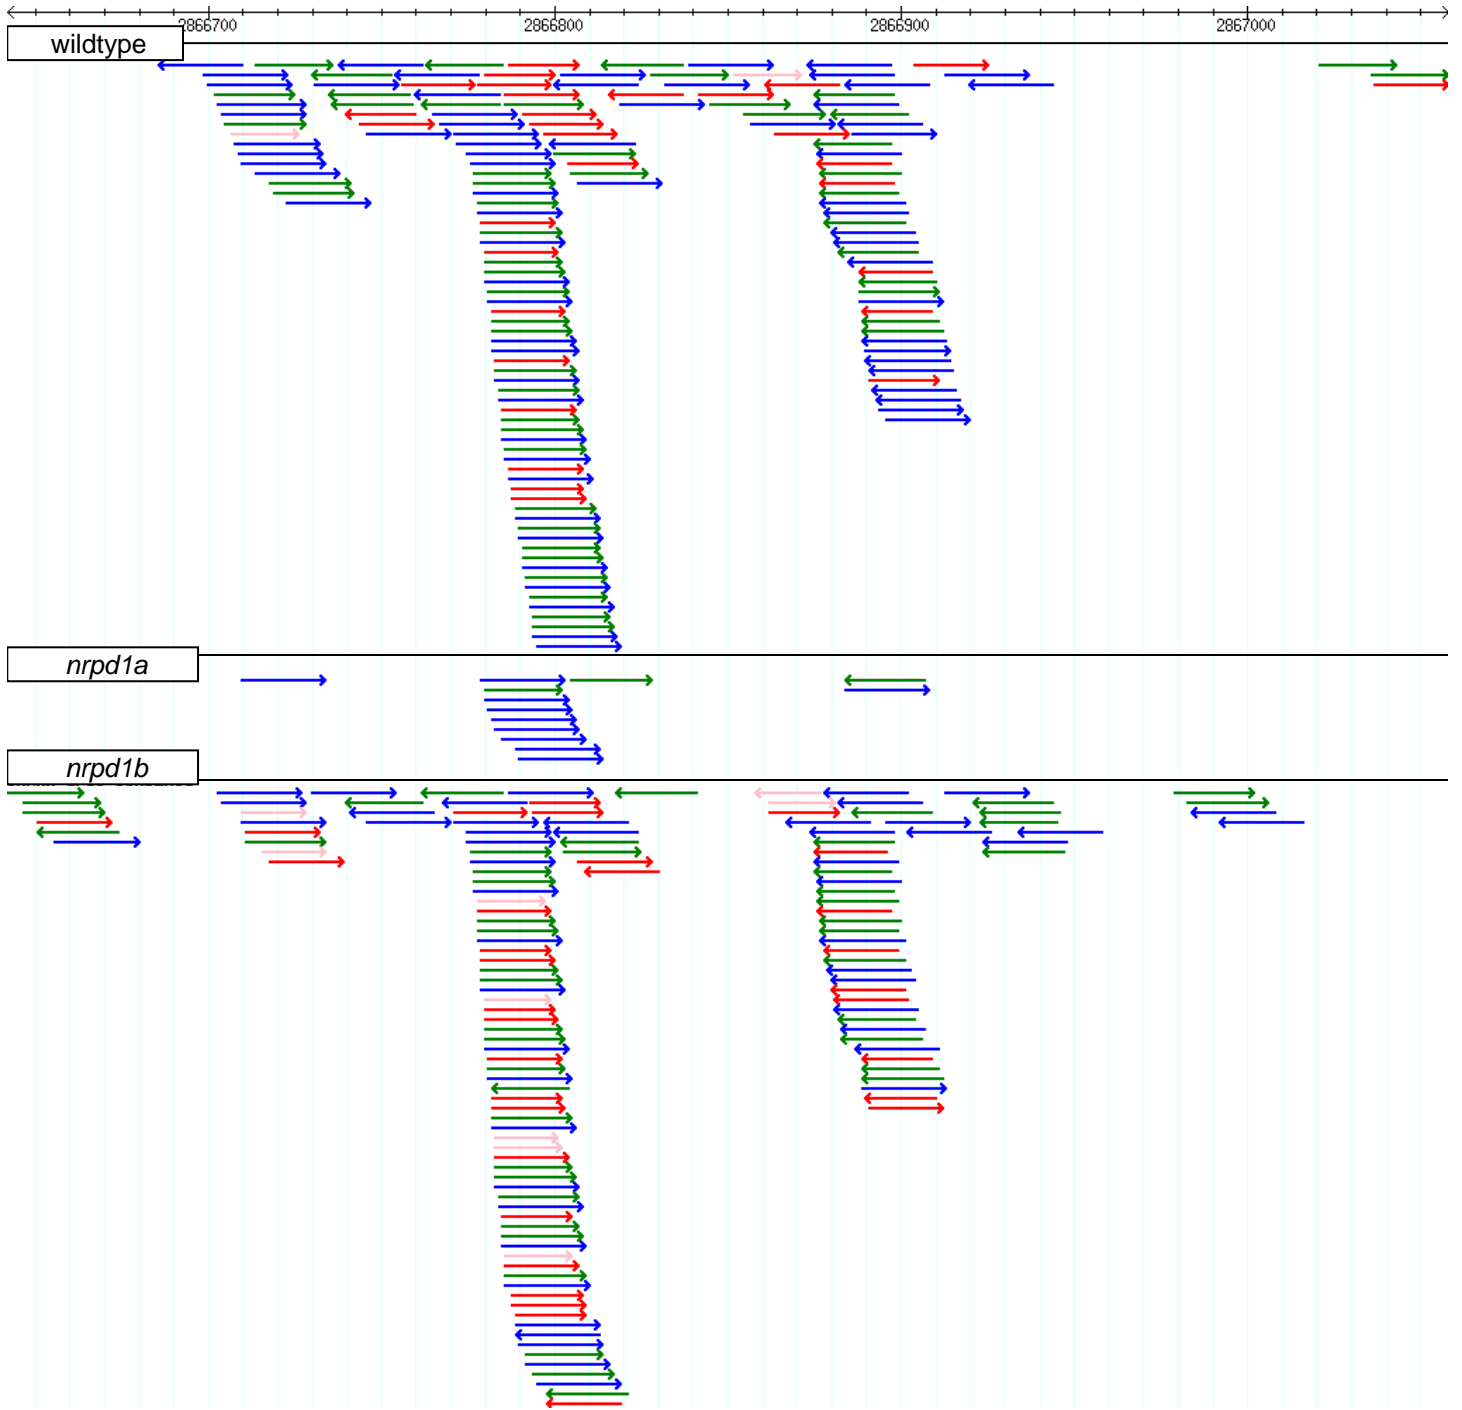

### Locus 10102 5:21854400..21855344

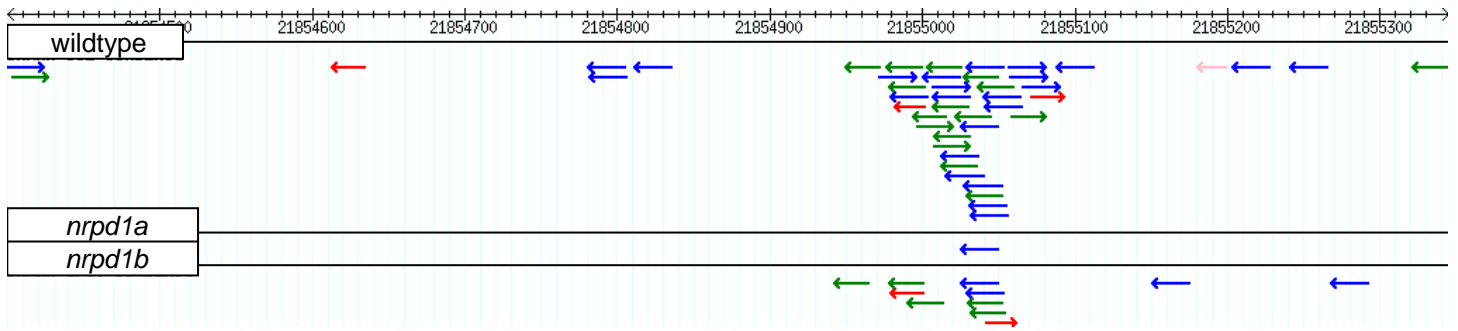

### Locus 08127 5:7640637..7641260

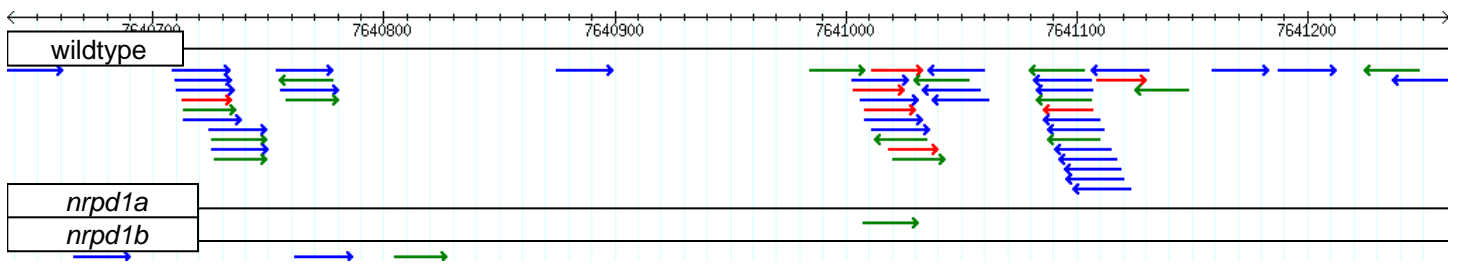

### Locus 02209 1:24429197..24429954

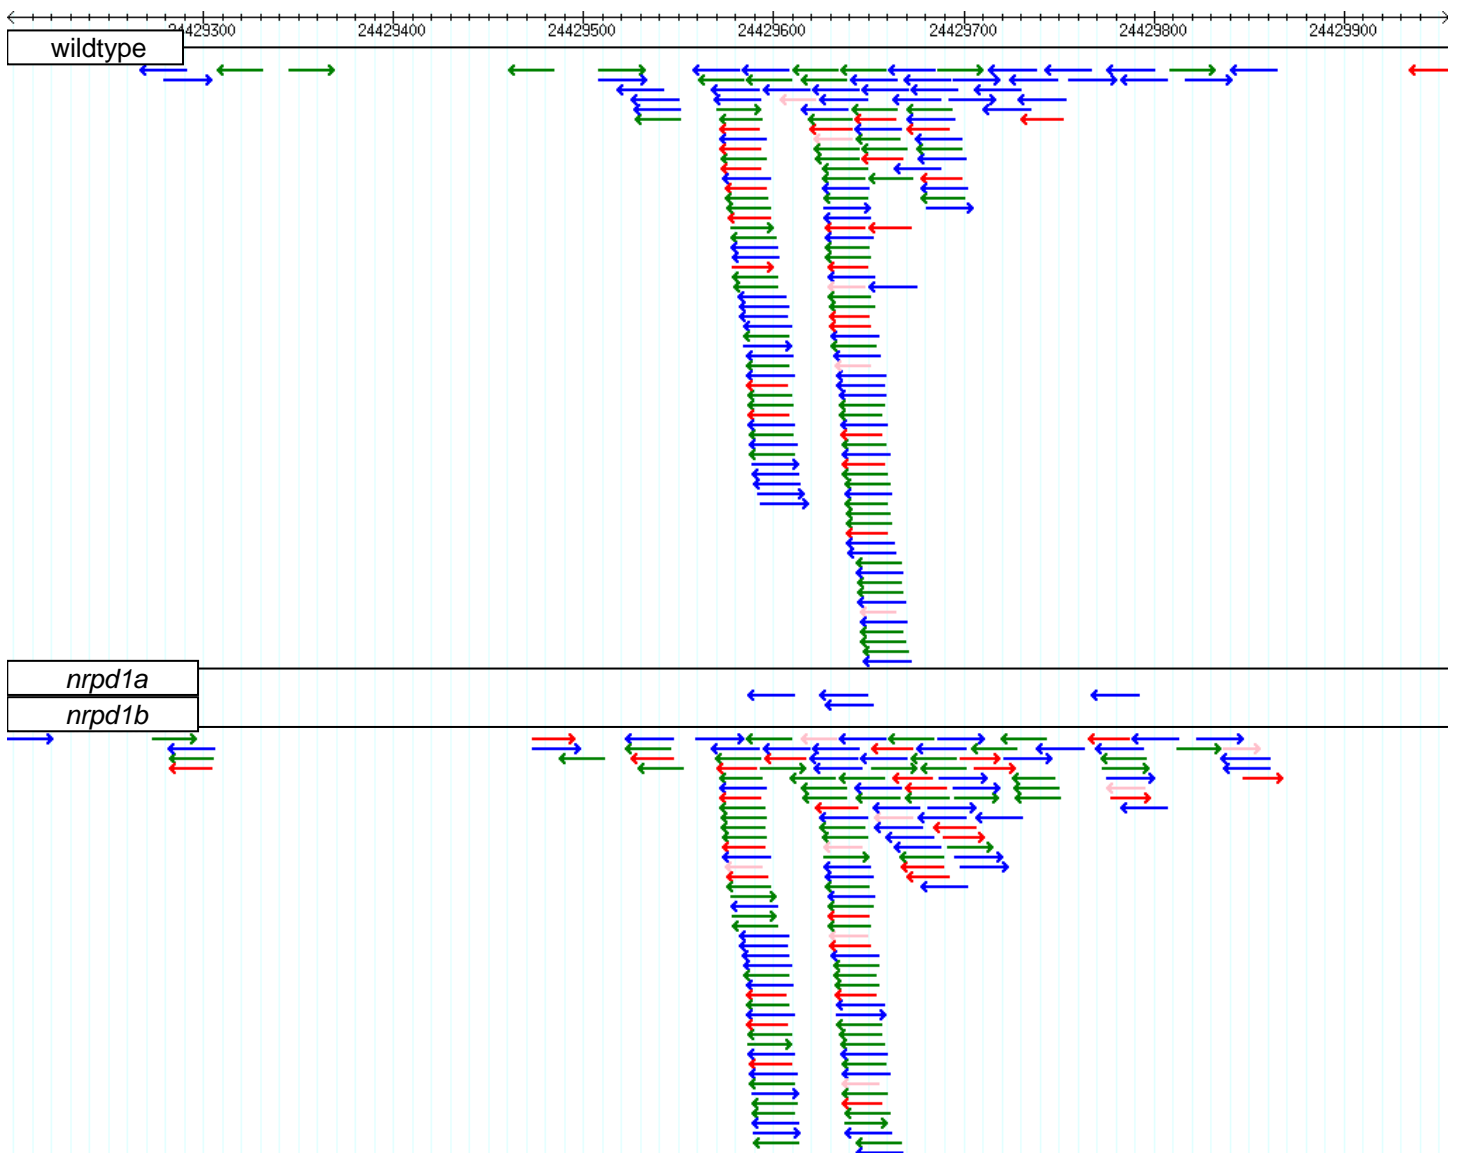

**Locus 04138 2:17854254..17854924**

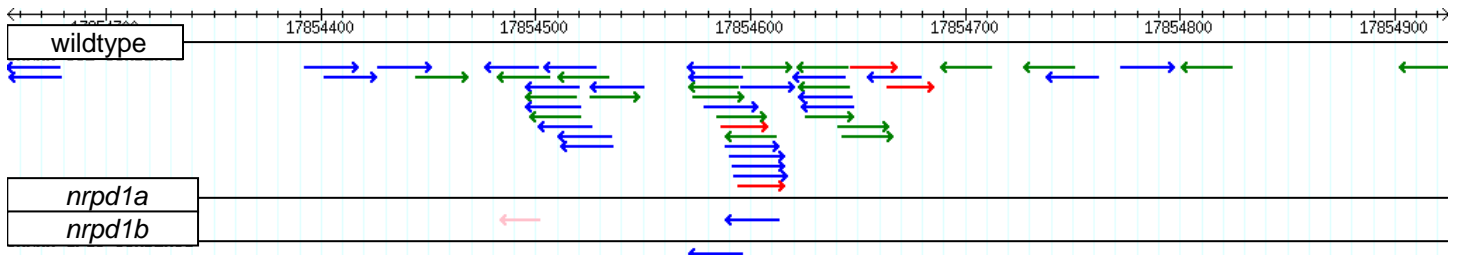

**Locus 01813 1:18229644..18230413**

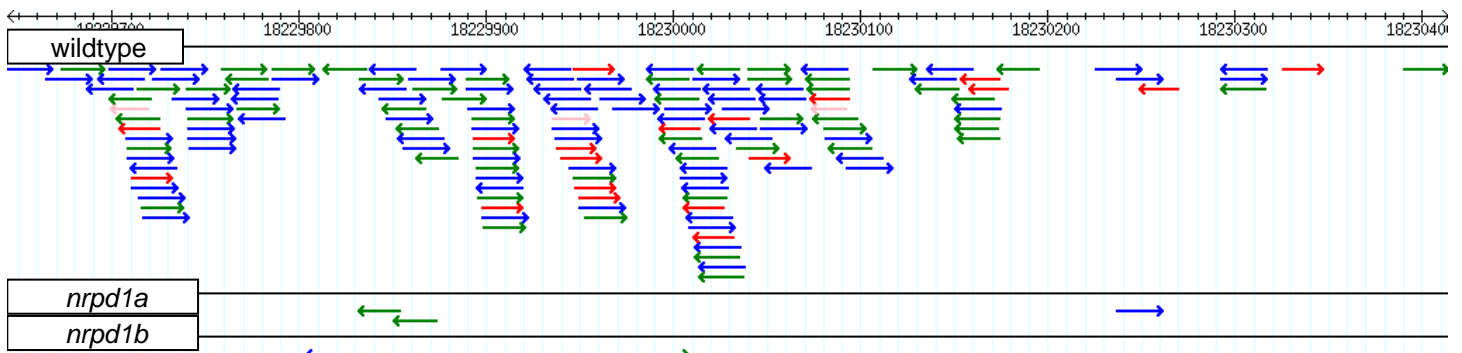

**Locus 05902 3:18556313..18557079**

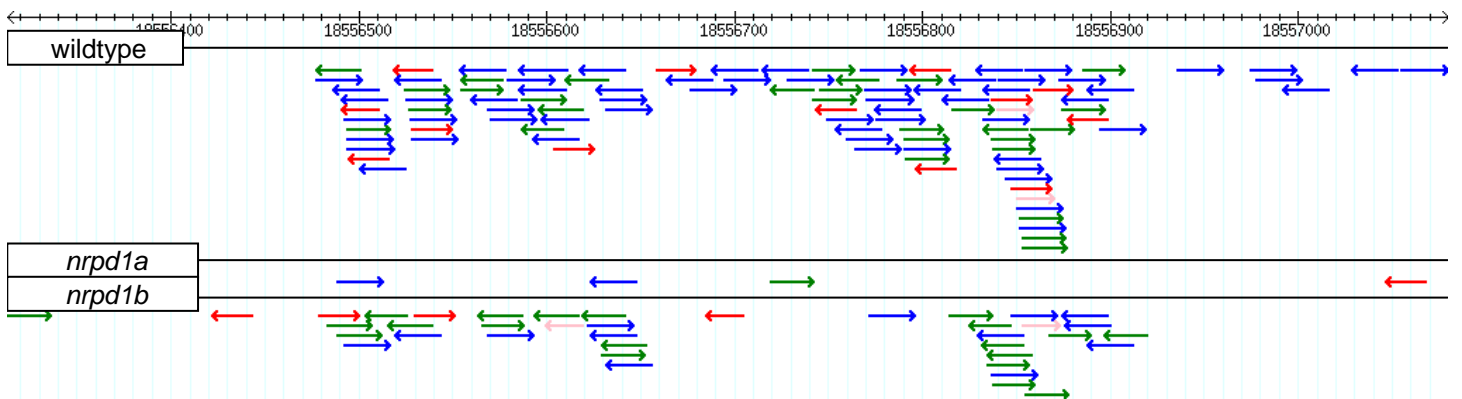

**Locus 07316 4:5808618..5808909**

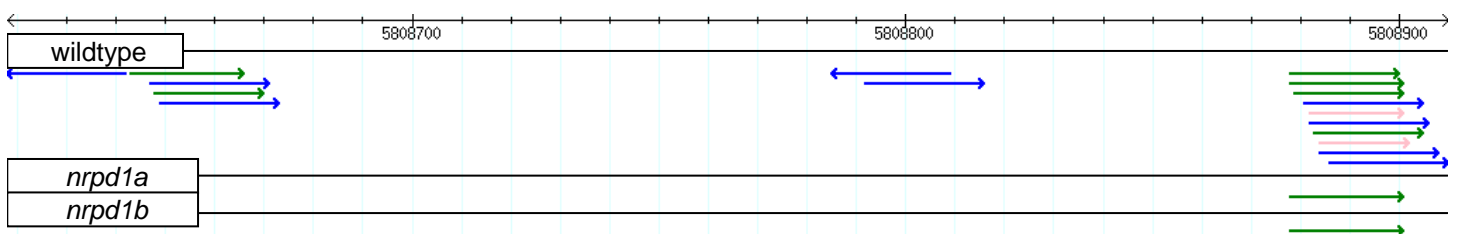

Supplement: pnas_0709632105_2.pdf [file pnas_0709632105_2.pdf]

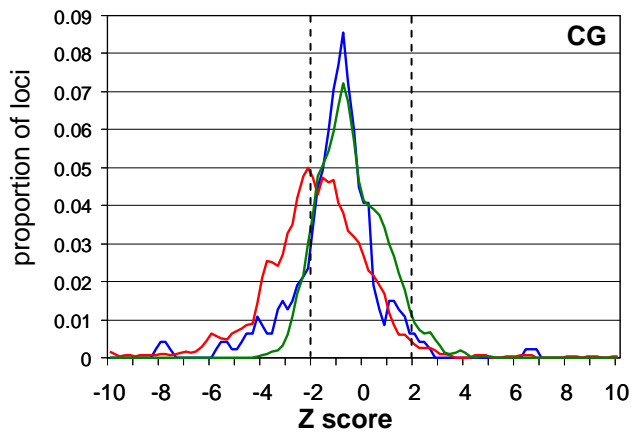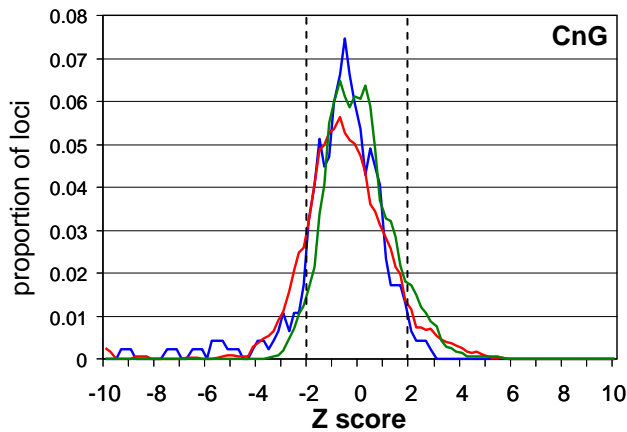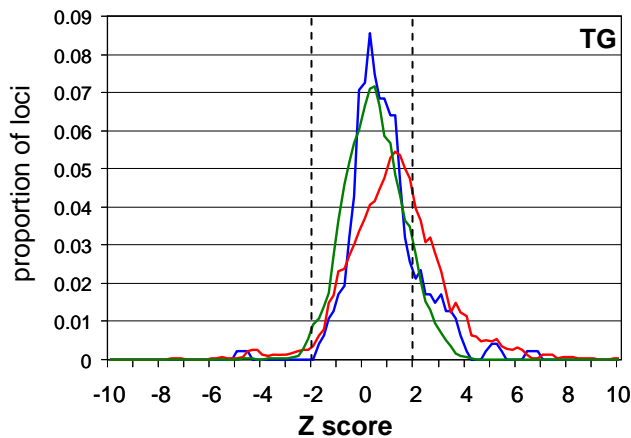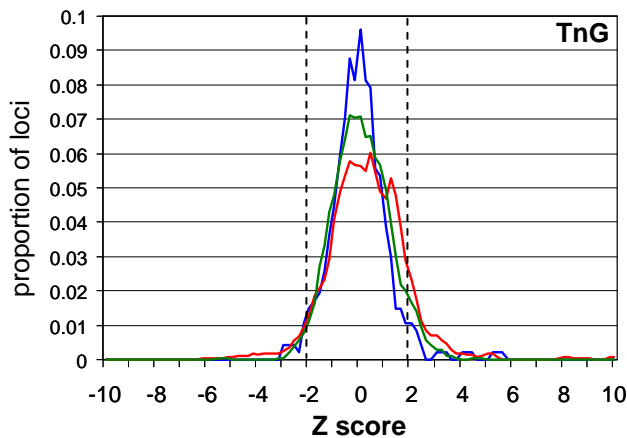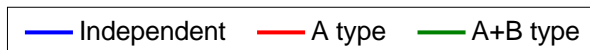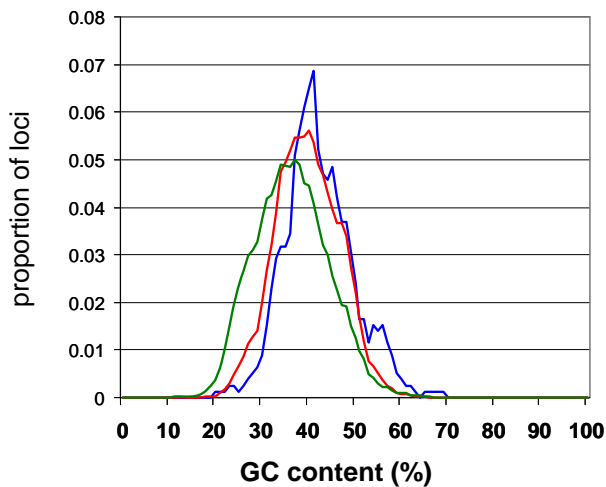

Supplement: pnas_0709632105_3.pdf [file pnas_0709632105_3.pdf]
